# Supplementary material for: Novel hydrocarbon-degradation pathways in uncultured bacteria in industrial-impacted ocean waters
Source: Research Square preprint supplement (doi:10.21203/rs.3.rs-2060586/v1), 2022-09-16
Supplement: Supplementary file 1 [file 2058a303155fc4d00a4ebc41.xlsx]

## Sheet: Sp4
		Supplementary Table 4. Relative abundance of MAGs in the metagenomes. Fist columns indicate the data used to calculate the abundance; the genome size, contig length, sequencing depth, number of reads, and coverage. The final columns indicate the relative abundance values.
		Bin	Original contig name	Sampling Site	Size	contigLen	Sample	Depth	Reads	cov	Sum_cov	NormalizedCov	RelativeAbundance	RelativeAbundanceReadable
		SIP_700_Bin15	700mSIPHEX1_15_scaffold_2_c1	700mSIPHEX1	3787977	1119410	700mSIPHEX1	5932.53	235445848	6.64093e+09	2.24032e+10	5914.3	2.51196e-05	2511.96
		SIP_700_Bin15	700mSIPHEX1_15_scaffold_9_c1	700mSIPHEX1	3787977	601528	700mSIPHEX1	5942.81	235445848	3.57477e+09	2.24032e+10	5914.3	2.51196e-05	2511.96
		SIP_700_Bin15	700mSIPHEX1_15_scaffold_11_c1	700mSIPHEX1	3787977	578285	700mSIPHEX1	6014.96	235445848	3.47836e+09	2.24032e+10	5914.3	2.51196e-05	2511.96
		SIP_700_Bin15	700mSIPHEX1_15_scaffold_16_c1	700mSIPHEX1	3787977	483303	700mSIPHEX1	5760.94	235445848	2.78428e+09	2.24032e+10	5914.3	2.51196e-05	2511.96
		SIP_700_Bin15	700mSIPHEX1_15_scaffold_36_c1	700mSIPHEX1	3787977	311803	700mSIPHEX1	5995.95	235445848	1.86956e+09	2.24032e+10	5914.3	2.51196e-05	2511.96
		SIP_700_Bin15	700mSIPHEX1_15_scaffold_57_c1	700mSIPHEX1	3787977	226414	700mSIPHEX1	5754.53	235445848	1.30291e+09	2.24032e+10	5914.3	2.51196e-05	2511.96
		SIP_700_Bin15	700mSIPHEX1_15_scaffold_116_c1	700mSIPHEX1	3787977	110215	700mSIPHEX1	5964.2	235445848	657344303	2.24032e+10	5914.3	2.51196e-05	2511.96
		SIP_700_Bin15	700mSIPHEX1_15_scaffold_126_c1	700mSIPHEX1	3787977	100791	700mSIPHEX1	5775.89	235445848	5.82158e+08	2.24032e+10	5914.3	2.51196e-05	2511.96
		SIP_700_Bin15	700mSIPHEX1_15_scaffold_131_c1	700mSIPHEX1	3787977	97808	700mSIPHEX1	6147.08	235445848	6.01234e+08	2.24032e+10	5914.3	2.51196e-05	2511.96
		SIP_700_Bin15	700mSIPHEX1_15_scaffold_161_c1	700mSIPHEX1	3787977	79657	700mSIPHEX1	5591.04	235445848	4.45365e+08	2.24032e+10	5914.3	2.51196e-05	2511.96
		SIP_700_Bin15	700mSIPHEX1_15_scaffold_288_c1	700mSIPHEX1	3787977	42401	700mSIPHEX1	5843.77	235445848	2.47782e+08	2.24032e+10	5914.3	2.51196e-05	2511.96
		SIP_700_Bin15	700mSIPHEX1_15_scaffold_338_c1	700mSIPHEX1	3787977	36366	700mSIPHEX1	6009.28	235445848	2.18533e+08	2.24032e+10	5914.3	2.51196e-05	2511.96
		SIP_700_Bin17	700mSIPHEX1_17_scaffold_1_c2	700mSIPHEX1	3544363	945042	700mSIPHEX1	131.532	235445848	1.24303e+08	5.45464e+08	153.896	6.53638e-07	65.3638
		SIP_700_Bin17	700mSIPHEX1_17_scaffold_15_c1	700mSIPHEX1	3544363	508649	700mSIPHEX1	180.535	235445848	9.18289e+07	5.45464e+08	153.896	6.53638e-07	65.3638
		SIP_700_Bin17	700mSIPHEX1_17_scaffold_18_c1	700mSIPHEX1	3544363	458266	700mSIPHEX1	171.507	235445848	7.85958e+07	5.45464e+08	153.896	6.53638e-07	65.3638
		SIP_700_Bin17	700mSIPHEX1_17_scaffold_20_c1	700mSIPHEX1	3544363	446616	700mSIPHEX1	165.943	235445848	7.41128e+07	5.45464e+08	153.896	6.53638e-07	65.3638
		SIP_700_Bin17	700mSIPHEX1_17_scaffold_28_c2	700mSIPHEX1	3544363	344444	700mSIPHEX1	124.609	235445848	4.29208e+07	5.45464e+08	153.896	6.53638e-07	65.3638
		SIP_700_Bin17	700mSIPHEX1_17_scaffold_50_c1	700mSIPHEX1	3544363	243335	700mSIPHEX1	170.086	235445848	4.13879e+07	5.45464e+08	153.896	6.53638e-07	65.3638
		SIP_700_Bin17	700mSIPHEX1_17_scaffold_1_c4	700mSIPHEX1	3544363	202615	700mSIPHEX1	139.851	235445848	2.83359e+07	5.45464e+08	153.896	6.53638e-07	65.3638
		SIP_700_Bin17	700mSIPHEX1_17_scaffold_81_c1	700mSIPHEX1	3544363	157414	700mSIPHEX1	167.866	235445848	2.64245e+07	5.45464e+08	153.896	6.53638e-07	65.3638
		SIP_700_Bin17	700mSIPHEX1_17_scaffold_107_c1	700mSIPHEX1	3544363	118327	700mSIPHEX1	155.569	235445848	1.8408e+07	5.45464e+08	153.896	6.53638e-07	65.3638
		SIP_700_Bin17	700mSIPHEX1_17_scaffold_204_c1	700mSIPHEX1	3544363	59231	700mSIPHEX1	118.698	235445848	7.0306e+06	5.45464e+08	153.896	6.53638e-07	65.3638
		SIP_700_Bin17	700mSIPHEX1_17_scaffold_233_c1	700mSIPHEX1	3544363	53279	700mSIPHEX1	172.49	235445848	9.19009e+06	5.45464e+08	153.896	6.53638e-07	65.3638
		SIP_700_Bin17	700mSIPHEX1_17_scaffold_2173_c1	700mSIPHEX1	3544363	3959	700mSIPHEX1	405.343	235445848	1.60475e+06	5.45464e+08	153.896	6.53638e-07	65.3638
		SIP_700_Bin17	700mSIPHEX1_17_scaffold_2809_c1	700mSIPHEX1	3544363	3186	700mSIPHEX1	414.663	235445848	1.32112e+06	5.45464e+08	153.896	6.53638e-07	65.3638
		SIP_700_Bin20	700mSIPHEX1_20_scaffold_3_c1	700mSIPHEX1	3668711	866949	700mSIPHEX1	1143.46	235445848	9.91322e+08	4.19584e+09	1143.68	4.85752e-06	485.752
		SIP_700_Bin20	700mSIPHEX1_20_scaffold_10_c1	700mSIPHEX1	3668711	589819	700mSIPHEX1	1150.79	235445848	6.78758e+08	4.19584e+09	1143.68	4.85752e-06	485.752
		SIP_700_Bin20	700mSIPHEX1_20_scaffold_13_c1	700mSIPHEX1	3668711	533724	700mSIPHEX1	1100.93	235445848	5.87593e+08	4.19584e+09	1143.68	4.85752e-06	485.752
		SIP_700_Bin20	700mSIPHEX1_20_scaffold_42_c1	700mSIPHEX1	3668711	287327	700mSIPHEX1	1036.7	235445848	2.97872e+08	4.19584e+09	1143.68	4.85752e-06	485.752
		SIP_700_Bin20	700mSIPHEX1_20_scaffold_17_c3	700mSIPHEX1	3668711	276524	700mSIPHEX1	1090.59	235445848	3.01574e+08	4.19584e+09	1143.68	4.85752e-06	485.752
		SIP_700_Bin20	700mSIPHEX1_20_scaffold_17_c1	700mSIPHEX1	3668711	179298	700mSIPHEX1	1091.44	235445848	1.95693e+08	4.19584e+09	1143.68	4.85752e-06	485.752
		SIP_700_Bin20	700mSIPHEX1_20_scaffold_76_c1	700mSIPHEX1	3668711	165589	700mSIPHEX1	1292.46	235445848	2.14017e+08	4.19584e+09	1143.68	4.85752e-06	485.752
		SIP_700_Bin20	700mSIPHEX1_20_scaffold_80_c1	700mSIPHEX1	3668711	159100	700mSIPHEX1	1113.7	235445848	177189670	4.19584e+09	1143.68	4.85752e-06	485.752
		SIP_700_Bin20	700mSIPHEX1_20_scaffold_3_c2	700mSIPHEX1	3668711	122843	700mSIPHEX1	1086.41	235445848	1.33458e+08	4.19584e+09	1143.68	4.85752e-06	485.752
		SIP_700_Bin20	700mSIPHEX1_20_scaffold_106_c1	700mSIPHEX1	3668711	119759	700mSIPHEX1	1289.96	235445848	1.54484e+08	4.19584e+09	1143.68	4.85752e-06	485.752
		SIP_700_Bin20	700mSIPHEX1_20_scaffold_121_c1	700mSIPHEX1	3668711	108528	700mSIPHEX1	1154.44	235445848	1.25289e+08	4.19584e+09	1143.68	4.85752e-06	485.752
		SIP_700_Bin20	700mSIPHEX1_20_scaffold_240_c1	700mSIPHEX1	3668711	51631	700mSIPHEX1	1452.38	235445848	7.49878e+07	4.19584e+09	1143.68	4.85752e-06	485.752
		SIP_700_Bin20	700mSIPHEX1_20_scaffold_278_c1	700mSIPHEX1	3668711	43644	700mSIPHEX1	1361.5	235445848	59421306	4.19584e+09	1143.68	4.85752e-06	485.752
		SIP_700_Bin20	700mSIPHEX1_20_scaffold_281_c1	700mSIPHEX1	3668711	43306	700mSIPHEX1	1038.91	235445848	4.4991e+07	4.19584e+09	1143.68	4.85752e-06	485.752
		SIP_700_Bin20	700mSIPHEX1_20_scaffold_3_c3	700mSIPHEX1	3668711	40323	700mSIPHEX1	959.511	235445848	3.86904e+07	4.19584e+09	1143.68	4.85752e-06	485.752
		SIP_700_Bin20	700mSIPHEX1_20_scaffold_424_c1	700mSIPHEX1	3668711	27840	700mSIPHEX1	988.954	235445848	2.75325e+07	4.19584e+09	1143.68	4.85752e-06	485.752
		SIP_700_Bin20	700mSIPHEX1_20_scaffold_827_c1	700mSIPHEX1	3668711	11762	700mSIPHEX1	1766.64	235445848	2.07792e+07	4.19584e+09	1143.68	4.85752e-06	485.752
		SIP_700_Bin20	700mSIPHEX1_20_scaffold_907_c1	700mSIPHEX1	3668711	10069	700mSIPHEX1	879.511	235445848	8.8558e+06	4.19584e+09	1143.68	4.85752e-06	485.752
		SIP_700_Bin20	700mSIPHEX1_20_scaffold_1149_c1	700mSIPHEX1	3668711	7197	700mSIPHEX1	1506.98	235445848	1.08457e+07	4.19584e+09	1143.68	4.85752e-06	485.752
		SIP_700_Bin20	700mSIPHEX1_20_scaffold_1229_c1	700mSIPHEX1	3668711	6640	700mSIPHEX1	3048.73	235445848	2.02436e+07	4.19584e+09	1143.68	4.85752e-06	485.752
		SIP_700_Bin20	700mSIPHEX1_20_scaffold_1523_c1	700mSIPHEX1	3668711	5375	700mSIPHEX1	2309.96	235445848	12416035	4.19584e+09	1143.68	4.85752e-06	485.752
		SIP_700_Bin20	700mSIPHEX1_20_scaffold_1682_c1	700mSIPHEX1	3668711	4921	700mSIPHEX1	3098.24	235445848	1.52464e+07	4.19584e+09	1143.68	4.85752e-06	485.752
		SIP_700_Bin20	700mSIPHEX1_20_scaffold_17_c2	700mSIPHEX1	3668711	3525	700mSIPHEX1	1014.9	235445848	3.57752e+06	4.19584e+09	1143.68	4.85752e-06	485.752
		SIP_700_Bin20	700mSIPHEX1_20_scaffold_3010_c1	700mSIPHEX1	3668711	3018	700mSIPHEX1	333.927	235445848	1.00779e+06	4.19584e+09	1143.68	4.85752e-06	485.752
		SIP_700_Bin12	700mSIPHEX1_12_scaffold_4_c1	700mSIPHEX1	3645291	764440	700mSIPHEX1	41.748	235445848	3.19138e+07	1.33963e+08	36.7497	1.56086e-07	15.6086
		SIP_700_Bin12	700mSIPHEX1_12_scaffold_7_c1	700mSIPHEX1	3645291	641070	700mSIPHEX1	36.1378	235445848	2.31669e+07	1.33963e+08	36.7497	1.56086e-07	15.6086
		SIP_700_Bin12	700mSIPHEX1_12_scaffold_14_c1	700mSIPHEX1	3645291	520948	700mSIPHEX1	35.1392	235445848	1.83057e+07	1.33963e+08	36.7497	1.56086e-07	15.6086
		SIP_700_Bin12	700mSIPHEX1_12_scaffold_21_c1	700mSIPHEX1	3645291	444409	700mSIPHEX1	36.0921	235445848	1.60397e+07	1.33963e+08	36.7497	1.56086e-07	15.6086
		SIP_700_Bin12	700mSIPHEX1_12_scaffold_35_c1	700mSIPHEX1	3645291	312776	700mSIPHEX1	33.665	235445848	1.05296e+07	1.33963e+08	36.7497	1.56086e-07	15.6086
		SIP_700_Bin12	700mSIPHEX1_12_scaffold_8_c1	700mSIPHEX1	3645291	289261	700mSIPHEX1	34.2633	235445848	9.91104e+06	1.33963e+08	36.7497	1.56086e-07	15.6086
		SIP_700_Bin12	700mSIPHEX1_12_scaffold_37_c2	700mSIPHEX1	3645291	241164	700mSIPHEX1	37.2853	235445848	8.99187e+06	1.33963e+08	36.7497	1.56086e-07	15.6086
		SIP_700_Bin12	700mSIPHEX1_12_scaffold_8_c2	700mSIPHEX1	3645291	225648	700mSIPHEX1	35.1052	235445848	7.92142e+06	1.33963e+08	36.7497	1.56086e-07	15.6086
		SIP_700_Bin12	700mSIPHEX1_12_scaffold_8_c4	700mSIPHEX1	3645291	118864	700mSIPHEX1	35.7272	235445848	4.24668e+06	1.33963e+08	36.7497	1.56086e-07	15.6086
		SIP_700_Bin12	700mSIPHEX1_12_scaffold_37_c1	700mSIPHEX1	3645291	68989	700mSIPHEX1	33.8109	235445848	2.33258e+06	1.33963e+08	36.7497	1.56086e-07	15.6086
		SIP_700_Bin12	700mSIPHEX1_12_scaffold_851_c1	700mSIPHEX1	3645291	11096	700mSIPHEX1	33.3748	235445848	370327	1.33963e+08	36.7497	1.56086e-07	15.6086
		SIP_700_Bin12	700mSIPHEX1_12_scaffold_1232_c1	700mSIPHEX1	3645291	6626	700mSIPHEX1	35.2761	235445848	233739	1.33963e+08	36.7497	1.56086e-07	15.6086
		SIP_700_Bin1	700mSIPHEX1_1_scaffold_5_c1	700mSIPHEX1	3417584	762443	700mSIPHEX1	28.1583	235445848	2.14691e+07	8.33533e+07	24.3895	1.03589e-07	10.3589
		SIP_700_Bin1	700mSIPHEX1_1_scaffold_19_c1	700mSIPHEX1	3417584	453135	700mSIPHEX1	27.5801	235445848	1.24975e+07	8.33533e+07	24.3895	1.03589e-07	10.3589
		SIP_700_Bin1	700mSIPHEX1_1_scaffold_32_c1	700mSIPHEX1	3417584	323503	700mSIPHEX1	23.7541	235445848	7.68452e+06	8.33533e+07	24.3895	1.03589e-07	10.3589
		SIP_700_Bin1	700mSIPHEX1_1_scaffold_40_c1	700mSIPHEX1	3417584	300120	700mSIPHEX1	24.4891	235445848	7.34967e+06	8.33533e+07	24.3895	1.03589e-07	10.3589
		SIP_700_Bin1	700mSIPHEX1_1_scaffold_47_c1	700mSIPHEX1	3417584	250335	700mSIPHEX1	29.6394	235445848	7.41978e+06	8.33533e+07	24.3895	1.03589e-07	10.3589
		SIP_700_Bin1	700mSIPHEX1_1_scaffold_72_c1	700mSIPHEX1	3417584	181925	700mSIPHEX1	25.988	235445848	4.72787e+06	8.33533e+07	24.3895	1.03589e-07	10.3589
		SIP_700_Bin1	700mSIPHEX1_1_scaffold_75_c1	700mSIPHEX1	3417584	165843	700mSIPHEX1	26.5545	235445848	4.40388e+06	8.33533e+07	24.3895	1.03589e-07	10.3589
		SIP_700_Bin1	700mSIPHEX1_1_scaffold_91_c1	700mSIPHEX1	3417584	134972	700mSIPHEX1	27.2515	235445848	3.67819e+06	8.33533e+07	24.3895	1.03589e-07	10.3589
		SIP_700_Bin1	700mSIPHEX1_1_scaffold_94_c1	700mSIPHEX1	3417584	130498	700mSIPHEX1	21.4027	235445848	2.79301e+06	8.33533e+07	24.3895	1.03589e-07	10.3589
		SIP_700_Bin1	700mSIPHEX1_1_scaffold_102_c1	700mSIPHEX1	3417584	122059	700mSIPHEX1	26.2194	235445848	3.20031e+06	8.33533e+07	24.3895	1.03589e-07	10.3589
		SIP_700_Bin1	700mSIPHEX1_1_scaffold_154_c1	700mSIPHEX1	3417584	83851	700mSIPHEX1	26.3438	235445848	2.20895e+06	8.33533e+07	24.3895	1.03589e-07	10.3589
		SIP_700_Bin1	700mSIPHEX1_1_scaffold_168_c1	700mSIPHEX1	3417584	75988	700mSIPHEX1	10.3345	235445848	785298	8.33533e+07	24.3895	1.03589e-07	10.3589
		SIP_700_Bin1	700mSIPHEX1_1_scaffold_133_c2	700mSIPHEX1	3417584	67670	700mSIPHEX1	11.2091	235445848	758520	8.33533e+07	24.3895	1.03589e-07	10.3589
		SIP_700_Bin1	700mSIPHEX1_1_scaffold_265_c1	700mSIPHEX1	3417584	45688	700mSIPHEX1	11.1379	235445848	508868	8.33533e+07	24.3895	1.03589e-07	10.3589
		SIP_700_Bin1	700mSIPHEX1_1_scaffold_297_c1	700mSIPHEX1	3417584	41103	700mSIPHEX1	10.5125	235445848	432095	8.33533e+07	24.3895	1.03589e-07	10.3589
		SIP_700_Bin1	700mSIPHEX1_1_scaffold_325_c1	700mSIPHEX1	3417584	37171	700mSIPHEX1	10.4219	235445848	387392	8.33533e+07	24.3895	1.03589e-07	10.3589
		SIP_700_Bin1	700mSIPHEX1_1_scaffold_327_c1	700mSIPHEX1	3417584	37026	700mSIPHEX1	22.1952	235445848	821799	8.33533e+07	24.3895	1.03589e-07	10.3589
		SIP_700_Bin1	700mSIPHEX1_1_scaffold_329_c1	700mSIPHEX1	3417584	37017	700mSIPHEX1	11.317	235445848	418921	8.33533e+07	24.3895	1.03589e-07	10.3589
		SIP_700_Bin1	700mSIPHEX1_1_scaffold_355_c1	700mSIPHEX1	3417584	34269	700mSIPHEX1	10.9805	235445848	376291	8.33533e+07	24.3895	1.03589e-07	10.3589
		SIP_700_Bin1	700mSIPHEX1_1_scaffold_133_c1	700mSIPHEX1	3417584	29411	700mSIPHEX1	11.8609	235445848	348841	8.33533e+07	24.3895	1.03589e-07	10.3589
		SIP_700_Bin1	700mSIPHEX1_1_scaffold_445_c1	700mSIPHEX1	3417584	26194	700mSIPHEX1	11.5328	235445848	302090	8.33533e+07	24.3895	1.03589e-07	10.3589
		SIP_700_Bin1	700mSIPHEX1_1_scaffold_452_c1	700mSIPHEX1	3417584	25755	700mSIPHEX1	10.5287	235445848	271167	8.33533e+07	24.3895	1.03589e-07	10.3589
		SIP_700_Bin1	700mSIPHEX1_1_scaffold_520_c1	700mSIPHEX1	3417584	21355	700mSIPHEX1	9.37769	235445848	200261	8.33533e+07	24.3895	1.03589e-07	10.3589
		SIP_700_Bin1	700mSIPHEX1_1_scaffold_534_c1	700mSIPHEX1	3417584	20620	700mSIPHEX1	10.275	235445848	211870	8.33533e+07	24.3895	1.03589e-07	10.3589
		SIP_700_Bin1	700mSIPHEX1_1_scaffold_933_c1	700mSIPHEX1	3417584	9633	700mSIPHEX1	10.0827	235445848	97126.6	8.33533e+07	24.3895	1.03589e-07	10.3589
		SIP_700_Bin3	700mSIPHEX1_3_scaffold_6_c1	700mSIPHEX1	4239060	676425	700mSIPHEX1	271.934	235445848	1.83943e+08	1.13438e+09	267.603	1.13658e-06	113.658
		SIP_700_Bin3	700mSIPHEX1_3_scaffold_12_c1	700mSIPHEX1	4239060	574438	700mSIPHEX1	256.107	235445848	1.47118e+08	1.13438e+09	267.603	1.13658e-06	113.658
		SIP_700_Bin3	700mSIPHEX1_3_scaffold_24_c1	700mSIPHEX1	4239060	414785	700mSIPHEX1	295.52	235445848	1.22577e+08	1.13438e+09	267.603	1.13658e-06	113.658
		SIP_700_Bin3	700mSIPHEX1_3_scaffold_31_c1	700mSIPHEX1	4239060	326428	700mSIPHEX1	254.035	235445848	8.29241e+07	1.13438e+09	267.603	1.13658e-06	113.658
		SIP_700_Bin3	700mSIPHEX1_3_scaffold_33_c1	700mSIPHEX1	4239060	317976	700mSIPHEX1	254.318	235445848	8.0867e+07	1.13438e+09	267.603	1.13658e-06	113.658
		SIP_700_Bin3	700mSIPHEX1_3_scaffold_41_c1	700mSIPHEX1	4239060	297570	700mSIPHEX1	267.438	235445848	7.95815e+07	1.13438e+09	267.603	1.13658e-06	113.658
		SIP_700_Bin3	700mSIPHEX1_3_scaffold_52_c1	700mSIPHEX1	4239060	236601	700mSIPHEX1	291.308	235445848	6.89238e+07	1.13438e+09	267.603	1.13658e-06	113.658
		SIP_700_Bin3	700mSIPHEX1_3_scaffold_65_c1	700mSIPHEX1	4239060	204992	700mSIPHEX1	267.979	235445848	5.49336e+07	1.13438e+09	267.603	1.13658e-06	113.658
		SIP_700_Bin3	700mSIPHEX1_3_scaffold_70_c1	700mSIPHEX1	4239060	186532	700mSIPHEX1	255.339	235445848	4.76289e+07	1.13438e+09	267.603	1.13658e-06	113.658
		SIP_700_Bin3	700mSIPHEX1_3_scaffold_71_c1	700mSIPHEX1	4239060	184752	700mSIPHEX1	260.691	235445848	4.81632e+07	1.13438e+09	267.603	1.13658e-06	113.658
		SIP_700_Bin3	700mSIPHEX1_3_scaffold_93_c1	700mSIPHEX1	4239060	130775	700mSIPHEX1	267.565	235445848	3.49908e+07	1.13438e+09	267.603	1.13658e-06	113.658
		SIP_700_Bin3	700mSIPHEX1_3_scaffold_109_c1	700mSIPHEX1	4239060	117680	700mSIPHEX1	250.403	235445848	2.94674e+07	1.13438e+09	267.603	1.13658e-06	113.658
		SIP_700_Bin3	700mSIPHEX1_3_scaffold_134_c1	700mSIPHEX1	4239060	96367	700mSIPHEX1	254.261	235445848	2.45024e+07	1.13438e+09	267.603	1.13658e-06	113.658
		SIP_700_Bin3	700mSIPHEX1_3_scaffold_151_c1	700mSIPHEX1	4239060	85408	700mSIPHEX1	261.94	235445848	2.23718e+07	1.13438e+09	267.603	1.13658e-06	113.658
		SIP_700_Bin3	700mSIPHEX1_3_scaffold_178_c1	700mSIPHEX1	4239060	72210	700mSIPHEX1	287.325	235445848	2.07477e+07	1.13438e+09	267.603	1.13658e-06	113.658
		SIP_700_Bin3	700mSIPHEX1_3_scaffold_199_c1	700mSIPHEX1	4239060	62481	700mSIPHEX1	246.956	235445848	1.54301e+07	1.13438e+09	267.603	1.13658e-06	113.658
		SIP_700_Bin3	700mSIPHEX1_3_scaffold_129_c1	700mSIPHEX1	4239060	60036	700mSIPHEX1	276.876	235445848	1.66225e+07	1.13438e+09	267.603	1.13658e-06	113.658
		SIP_700_Bin3	700mSIPHEX1_3_scaffold_284_c1	700mSIPHEX1	4239060	43034	700mSIPHEX1	258.078	235445848	1.11061e+07	1.13438e+09	267.603	1.13658e-06	113.658
		SIP_700_Bin3	700mSIPHEX1_3_scaffold_129_c2	700mSIPHEX1	4239060	39286	700mSIPHEX1	286.724	235445848	1.12642e+07	1.13438e+09	267.603	1.13658e-06	113.658
		SIP_700_Bin3	700mSIPHEX1_3_scaffold_328_c1	700mSIPHEX1	4239060	37024	700mSIPHEX1	283.036	235445848	1.04791e+07	1.13438e+09	267.603	1.13658e-06	113.658
		SIP_700_Bin3	700mSIPHEX1_3_scaffold_359_c1	700mSIPHEX1	4239060	33692	700mSIPHEX1	263.633	235445848	8.88232e+06	1.13438e+09	267.603	1.13658e-06	113.658
		SIP_700_Bin3	700mSIPHEX1_3_scaffold_420_c1	700mSIPHEX1	4239060	28123	700mSIPHEX1	289.419	235445848	8.13933e+06	1.13438e+09	267.603	1.13658e-06	113.658
		SIP_700_Bin3	700mSIPHEX1_3_scaffold_1165_c1	700mSIPHEX1	4239060	7096	700mSIPHEX1	293.513	235445848	2.08277e+06	1.13438e+09	267.603	1.13658e-06	113.658
		SIP_700_Bin3	700mSIPHEX1_3_scaffold_1537_c1	700mSIPHEX1	4239060	5349	700mSIPHEX1	306.11	235445848	1.63738e+06	1.13438e+09	267.603	1.13658e-06	113.658
		SIP_700_Bin18	700mSIPHEX1_18_scaffold_22_c1	700mSIPHEX1	4300731	420903	700mSIPHEX1	409.209	235445848	1.72237e+08	1.85106e+09	430.406	1.82805e-06	182.805
		SIP_700_Bin18	700mSIPHEX1_18_scaffold_29_c1	700mSIPHEX1	4300731	332917	700mSIPHEX1	433.402	235445848	1.44287e+08	1.85106e+09	430.406	1.82805e-06	182.805
		SIP_700_Bin18	700mSIPHEX1_18_scaffold_30_c1	700mSIPHEX1	4300731	326890	700mSIPHEX1	429.102	235445848	1.40269e+08	1.85106e+09	430.406	1.82805e-06	182.805
		SIP_700_Bin18	700mSIPHEX1_18_scaffold_55_c1	700mSIPHEX1	4300731	229929	700mSIPHEX1	444.112	235445848	1.02114e+08	1.85106e+09	430.406	1.82805e-06	182.805
		SIP_700_Bin18	700mSIPHEX1_18_scaffold_63_c1	700mSIPHEX1	4300731	217423	700mSIPHEX1	430.553	235445848	9.36121e+07	1.85106e+09	430.406	1.82805e-06	182.805
		SIP_700_Bin18	700mSIPHEX1_18_scaffold_64_c1	700mSIPHEX1	4300731	213903	700mSIPHEX1	424.532	235445848	9.08087e+07	1.85106e+09	430.406	1.82805e-06	182.805
		SIP_700_Bin18	700mSIPHEX1_18_scaffold_25_c2	700mSIPHEX1	4300731	206811	700mSIPHEX1	438.615	235445848	9.07104e+07	1.85106e+09	430.406	1.82805e-06	182.805
		SIP_700_Bin18	700mSIPHEX1_18_scaffold_25_c1	700mSIPHEX1	4300731	202892	700mSIPHEX1	438.825	235445848	8.90341e+07	1.85106e+09	430.406	1.82805e-06	182.805
		SIP_700_Bin18	700mSIPHEX1_18_scaffold_83_c1	700mSIPHEX1	4300731	143841	700mSIPHEX1	438.901	235445848	6.3132e+07	1.85106e+09	430.406	1.82805e-06	182.805
		SIP_700_Bin18	700mSIPHEX1_18_scaffold_85_c1	700mSIPHEX1	4300731	142338	700mSIPHEX1	428.517	235445848	6.09943e+07	1.85106e+09	430.406	1.82805e-06	182.805
		SIP_700_Bin18	700mSIPHEX1_18_scaffold_95_c1	700mSIPHEX1	4300731	129603	700mSIPHEX1	437.872	235445848	5.67495e+07	1.85106e+09	430.406	1.82805e-06	182.805
		SIP_700_Bin18	700mSIPHEX1_18_scaffold_97_c1	700mSIPHEX1	4300731	127452	700mSIPHEX1	429.155	235445848	5.46967e+07	1.85106e+09	430.406	1.82805e-06	182.805
		SIP_700_Bin18	700mSIPHEX1_18_scaffold_98_c1	700mSIPHEX1	4300731	126680	700mSIPHEX1	428.683	235445848	5.43056e+07	1.85106e+09	430.406	1.82805e-06	182.805
		SIP_700_Bin18	700mSIPHEX1_18_scaffold_111_c1	700mSIPHEX1	4300731	116363	700mSIPHEX1	435.312	235445848	5.06542e+07	1.85106e+09	430.406	1.82805e-06	182.805
		SIP_700_Bin18	700mSIPHEX1_18_scaffold_115_c1	700mSIPHEX1	4300731	110891	700mSIPHEX1	443.818	235445848	4.92154e+07	1.85106e+09	430.406	1.82805e-06	182.805
		SIP_700_Bin18	700mSIPHEX1_18_scaffold_122_c1	700mSIPHEX1	4300731	106452	700mSIPHEX1	426.344	235445848	4.53852e+07	1.85106e+09	430.406	1.82805e-06	182.805
		SIP_700_Bin18	700mSIPHEX1_18_scaffold_138_c1	700mSIPHEX1	4300731	94564	700mSIPHEX1	422.41	235445848	3.99448e+07	1.85106e+09	430.406	1.82805e-06	182.805
		SIP_700_Bin18	700mSIPHEX1_18_scaffold_145_c1	700mSIPHEX1	4300731	88633	700mSIPHEX1	438.435	235445848	3.88598e+07	1.85106e+09	430.406	1.82805e-06	182.805
		SIP_700_Bin18	700mSIPHEX1_18_scaffold_148_c1	700mSIPHEX1	4300731	86199	700mSIPHEX1	396.177	235445848	3.41501e+07	1.85106e+09	430.406	1.82805e-06	182.805
		SIP_700_Bin18	700mSIPHEX1_18_scaffold_159_c1	700mSIPHEX1	4300731	80919	700mSIPHEX1	426.073	235445848	3.44774e+07	1.85106e+09	430.406	1.82805e-06	182.805
		SIP_700_Bin18	700mSIPHEX1_18_scaffold_162_c1	700mSIPHEX1	4300731	79011	700mSIPHEX1	442.184	235445848	3.49374e+07	1.85106e+09	430.406	1.82805e-06	182.805
		SIP_700_Bin18	700mSIPHEX1_18_scaffold_165_c1	700mSIPHEX1	4300731	77470	700mSIPHEX1	415.813	235445848	3.2213e+07	1.85106e+09	430.406	1.82805e-06	182.805
		SIP_700_Bin18	700mSIPHEX1_18_scaffold_174_c1	700mSIPHEX1	4300731	73963	700mSIPHEX1	443.058	235445848	3.27699e+07	1.85106e+09	430.406	1.82805e-06	182.805
		SIP_700_Bin18	700mSIPHEX1_18_scaffold_181_c1	700mSIPHEX1	4300731	70091	700mSIPHEX1	443.692	235445848	3.10988e+07	1.85106e+09	430.406	1.82805e-06	182.805
		SIP_700_Bin18	700mSIPHEX1_18_scaffold_183_c1	700mSIPHEX1	4300731	69352	700mSIPHEX1	440.992	235445848	3.05837e+07	1.85106e+09	430.406	1.82805e-06	182.805
		SIP_700_Bin18	700mSIPHEX1_18_scaffold_226_c1	700mSIPHEX1	4300731	54728	700mSIPHEX1	441.105	235445848	2.41408e+07	1.85106e+09	430.406	1.82805e-06	182.805
		SIP_700_Bin18	700mSIPHEX1_18_scaffold_252_c1	700mSIPHEX1	4300731	48066	700mSIPHEX1	388.828	235445848	1.86894e+07	1.85106e+09	430.406	1.82805e-06	182.805
		SIP_700_Bin18	700mSIPHEX1_18_scaffold_257_c1	700mSIPHEX1	4300731	47209	700mSIPHEX1	427.778	235445848	2.0195e+07	1.85106e+09	430.406	1.82805e-06	182.805
		SIP_700_Bin18	700mSIPHEX1_18_scaffold_268_c1	700mSIPHEX1	4300731	45358	700mSIPHEX1	462.54	235445848	2.09799e+07	1.85106e+09	430.406	1.82805e-06	182.805
		SIP_700_Bin18	700mSIPHEX1_18_scaffold_272_c1	700mSIPHEX1	4300731	44711	700mSIPHEX1	444.531	235445848	1.98754e+07	1.85106e+09	430.406	1.82805e-06	182.805
		SIP_700_Bin18	700mSIPHEX1_18_scaffold_330_c1	700mSIPHEX1	4300731	36991	700mSIPHEX1	448.922	235445848	1.66061e+07	1.85106e+09	430.406	1.82805e-06	182.805
		SIP_700_Bin18	700mSIPHEX1_18_scaffold_429_c1	700mSIPHEX1	4300731	27302	700mSIPHEX1	412.293	235445848	1.12564e+07	1.85106e+09	430.406	1.82805e-06	182.805
		SIP_700_Bin18	700mSIPHEX1_18_scaffold_442_c1	700mSIPHEX1	4300731	26294	700mSIPHEX1	414.438	235445848	1.08972e+07	1.85106e+09	430.406	1.82805e-06	182.805
		SIP_700_Bin18	700mSIPHEX1_18_scaffold_655_c1	700mSIPHEX1	4300731	15897	700mSIPHEX1	406.111	235445848	6.45595e+06	1.85106e+09	430.406	1.82805e-06	182.805
		SIP_700_Bin18	700mSIPHEX1_18_scaffold_707_c1	700mSIPHEX1	4300731	14464	700mSIPHEX1	448.918	235445848	6.49315e+06	1.85106e+09	430.406	1.82805e-06	182.805
		SIP_700_Bin18	700mSIPHEX1_18_scaffold_756_c1	700mSIPHEX1	4300731	13012	700mSIPHEX1	541.641	235445848	7.04783e+06	1.85106e+09	430.406	1.82805e-06	182.805
		SIP_700_Bin18	700mSIPHEX1_18_scaffold_936_c1	700mSIPHEX1	4300731	9606	700mSIPHEX1	411.426	235445848	3.95216e+06	1.85106e+09	430.406	1.82805e-06	182.805
		SIP_700_Bin18	700mSIPHEX1_18_scaffold_1048_c1	700mSIPHEX1	4300731	8090	700mSIPHEX1	398.056	235445848	3.22027e+06	1.85106e+09	430.406	1.82805e-06	182.805
		SIP_700_Bin18	700mSIPHEX1_18_scaffold_1071_c1	700mSIPHEX1	4300731	7895	700mSIPHEX1	418.019	235445848	3.30026e+06	1.85106e+09	430.406	1.82805e-06	182.805
		SIP_700_Bin18	700mSIPHEX1_18_scaffold_1623_c1	700mSIPHEX1	4300731	5093	700mSIPHEX1	392.532	235445848	1.99917e+06	1.85106e+09	430.406	1.82805e-06	182.805
		SIP_700_Bin18	700mSIPHEX1_18_scaffold_1946_c1	700mSIPHEX1	4300731	4350	700mSIPHEX1	429.956	235445848	1.87031e+06	1.85106e+09	430.406	1.82805e-06	182.805
		SIP_700_Bin18	700mSIPHEX1_18_scaffold_2059_c1	700mSIPHEX1	4300731	4151	700mSIPHEX1	402.338	235445848	1.67011e+06	1.85106e+09	430.406	1.82805e-06	182.805
		SIP_700_Bin18	700mSIPHEX1_18_scaffold_2722_c1	700mSIPHEX1	4300731	3275	700mSIPHEX1	441.679	235445848	1.4465e+06	1.85106e+09	430.406	1.82805e-06	182.805
		SIP_700_Bin18	700mSIPHEX1_18_scaffold_2734_c1	700mSIPHEX1	4300731	3255	700mSIPHEX1	431.058	235445848	1.40309e+06	1.85106e+09	430.406	1.82805e-06	182.805
		SIP_700_Bin18	700mSIPHEX1_18_scaffold_3290_c1	700mSIPHEX1	4300731	2824	700mSIPHEX1	427.491	235445848	1.20723e+06	1.85106e+09	430.406	1.82805e-06	182.805
		SIP_700_Bin18	700mSIPHEX1_18_scaffold_3549_c1	700mSIPHEX1	4300731	2670	700mSIPHEX1	417.387	235445848	1.11442e+06	1.85106e+09	430.406	1.82805e-06	182.805
		SIP_700_Bin8	700mSIPHEX1_8_scaffold_23_c1	700mSIPHEX1	4061898	417207	700mSIPHEX1	36.3925	235445848	1.51832e+07	1.45408e+08	35.7981	1.52044e-07	15.2044
		SIP_700_Bin8	700mSIPHEX1_8_scaffold_26_c1	700mSIPHEX1	4061898	384967	700mSIPHEX1	38.9428	235445848	1.49917e+07	1.45408e+08	35.7981	1.52044e-07	15.2044
		SIP_700_Bin8	700mSIPHEX1_8_scaffold_62_c1	700mSIPHEX1	4061898	217571	700mSIPHEX1	37.5137	235445848	8.16189e+06	1.45408e+08	35.7981	1.52044e-07	15.2044
		SIP_700_Bin8	700mSIPHEX1_8_scaffold_38_c2	700mSIPHEX1	4061898	211339	700mSIPHEX1	33.4088	235445848	7.06058e+06	1.45408e+08	35.7981	1.52044e-07	15.2044
		SIP_700_Bin8	700mSIPHEX1_8_scaffold_69_c1	700mSIPHEX1	4061898	190704	700mSIPHEX1	36.3697	235445848	6.93585e+06	1.45408e+08	35.7981	1.52044e-07	15.2044
		SIP_700_Bin8	700mSIPHEX1_8_scaffold_78_c1	700mSIPHEX1	4061898	163342	700mSIPHEX1	34.3376	235445848	5.60877e+06	1.45408e+08	35.7981	1.52044e-07	15.2044
		SIP_700_Bin8	700mSIPHEX1_8_scaffold_79_c1	700mSIPHEX1	4061898	162465	700mSIPHEX1	35.3055	235445848	5.73591e+06	1.45408e+08	35.7981	1.52044e-07	15.2044
		SIP_700_Bin8	700mSIPHEX1_8_scaffold_48_c1	700mSIPHEX1	4061898	159016	700mSIPHEX1	36.075	235445848	5.7365e+06	1.45408e+08	35.7981	1.52044e-07	15.2044
		SIP_700_Bin8	700mSIPHEX1_8_scaffold_82_c1	700mSIPHEX1	4061898	155931	700mSIPHEX1	33.7213	235445848	5.2582e+06	1.45408e+08	35.7981	1.52044e-07	15.2044
		SIP_700_Bin8	700mSIPHEX1_8_scaffold_84_c1	700mSIPHEX1	4061898	143343	700mSIPHEX1	34.2558	235445848	4.91033e+06	1.45408e+08	35.7981	1.52044e-07	15.2044
		SIP_700_Bin8	700mSIPHEX1_8_scaffold_51_c1	700mSIPHEX1	4061898	141577	700mSIPHEX1	31.9451	235445848	4.52269e+06	1.45408e+08	35.7981	1.52044e-07	15.2044
		SIP_700_Bin8	700mSIPHEX1_8_scaffold_101_c1	700mSIPHEX1	4061898	123688	700mSIPHEX1	32.1428	235445848	3.97568e+06	1.45408e+08	35.7981	1.52044e-07	15.2044
		SIP_700_Bin8	700mSIPHEX1_8_scaffold_110_c1	700mSIPHEX1	4061898	117258	700mSIPHEX1	33.7887	235445848	3.962e+06	1.45408e+08	35.7981	1.52044e-07	15.2044
		SIP_700_Bin8	700mSIPHEX1_8_scaffold_132_c1	700mSIPHEX1	4061898	97778	700mSIPHEX1	32.2372	235445848	3.15209e+06	1.45408e+08	35.7981	1.52044e-07	15.2044
		SIP_700_Bin8	700mSIPHEX1_8_scaffold_38_c1	700mSIPHEX1	4061898	96750	700mSIPHEX1	34.3249	235445848	3.32093e+06	1.45408e+08	35.7981	1.52044e-07	15.2044
		SIP_700_Bin8	700mSIPHEX1_8_scaffold_51_c2	700mSIPHEX1	4061898	96253	700mSIPHEX1	32.5684	235445848	3.13481e+06	1.45408e+08	35.7981	1.52044e-07	15.2044
		SIP_700_Bin8	700mSIPHEX1_8_scaffold_135_c1	700mSIPHEX1	4061898	95811	700mSIPHEX1	35.6738	235445848	3.41794e+06	1.45408e+08	35.7981	1.52044e-07	15.2044
		SIP_700_Bin8	700mSIPHEX1_8_scaffold_48_c2	700mSIPHEX1	4061898	85832	700mSIPHEX1	39.105	235445848	3.35646e+06	1.45408e+08	35.7981	1.52044e-07	15.2044
		SIP_700_Bin8	700mSIPHEX1_8_scaffold_149_c1	700mSIPHEX1	4061898	85622	700mSIPHEX1	38.6605	235445848	3.31019e+06	1.45408e+08	35.7981	1.52044e-07	15.2044
		SIP_700_Bin8	700mSIPHEX1_8_scaffold_157_c1	700mSIPHEX1	4061898	82955	700mSIPHEX1	35.2006	235445848	2.92007e+06	1.45408e+08	35.7981	1.52044e-07	15.2044
		SIP_700_Bin8	700mSIPHEX1_8_scaffold_187_c1	700mSIPHEX1	4061898	67516	700mSIPHEX1	37.4304	235445848	2.52715e+06	1.45408e+08	35.7981	1.52044e-07	15.2044
		SIP_700_Bin8	700mSIPHEX1_8_scaffold_189_c1	700mSIPHEX1	4061898	67077	700mSIPHEX1	34.1411	235445848	2.29008e+06	1.45408e+08	35.7981	1.52044e-07	15.2044
		SIP_700_Bin8	700mSIPHEX1_8_scaffold_196_c1	700mSIPHEX1	4061898	64595	700mSIPHEX1	37.444	235445848	2.4187e+06	1.45408e+08	35.7981	1.52044e-07	15.2044
		SIP_700_Bin8	700mSIPHEX1_8_scaffold_147_c2	700mSIPHEX1	4061898	54011	700mSIPHEX1	32.9801	235445848	1.78129e+06	1.45408e+08	35.7981	1.52044e-07	15.2044
		SIP_700_Bin8	700mSIPHEX1_8_scaffold_254_c1	700mSIPHEX1	4061898	47786	700mSIPHEX1	35.3785	235445848	1.6906e+06	1.45408e+08	35.7981	1.52044e-07	15.2044
		SIP_700_Bin8	700mSIPHEX1_8_scaffold_271_c1	700mSIPHEX1	4061898	44894	700mSIPHEX1	35.0791	235445848	1.57484e+06	1.45408e+08	35.7981	1.52044e-07	15.2044
		SIP_700_Bin8	700mSIPHEX1_8_scaffold_283_c1	700mSIPHEX1	4061898	43077	700mSIPHEX1	37.018	235445848	1.59462e+06	1.45408e+08	35.7981	1.52044e-07	15.2044
		SIP_700_Bin8	700mSIPHEX1_8_scaffold_294_c1	700mSIPHEX1	4061898	41582	700mSIPHEX1	39.9681	235445848	1.66195e+06	1.45408e+08	35.7981	1.52044e-07	15.2044
		SIP_700_Bin8	700mSIPHEX1_8_scaffold_324_c1	700mSIPHEX1	4061898	37776	700mSIPHEX1	43.7156	235445848	1.6514e+06	1.45408e+08	35.7981	1.52044e-07	15.2044
		SIP_700_Bin8	700mSIPHEX1_8_scaffold_147_c1	700mSIPHEX1	4061898	33124	700mSIPHEX1	32.2938	235445848	1.0697e+06	1.45408e+08	35.7981	1.52044e-07	15.2044
		SIP_700_Bin8	700mSIPHEX1_8_scaffold_370_c1	700mSIPHEX1	4061898	32401	700mSIPHEX1	36.8885	235445848	1.19522e+06	1.45408e+08	35.7981	1.52044e-07	15.2044
		SIP_700_Bin8	700mSIPHEX1_8_scaffold_412_c1	700mSIPHEX1	4061898	29048	700mSIPHEX1	37.7967	235445848	1.09792e+06	1.45408e+08	35.7981	1.52044e-07	15.2044
		SIP_700_Bin8	700mSIPHEX1_8_scaffold_422_c1	700mSIPHEX1	4061898	27907	700mSIPHEX1	41.9377	235445848	1.17036e+06	1.45408e+08	35.7981	1.52044e-07	15.2044
		SIP_700_Bin8	700mSIPHEX1_8_scaffold_494_c1	700mSIPHEX1	4061898	22741	700mSIPHEX1	36.087	235445848	820654	1.45408e+08	35.7981	1.52044e-07	15.2044
		SIP_700_Bin8	700mSIPHEX1_8_scaffold_499_c1	700mSIPHEX1	4061898	22529	700mSIPHEX1	32.8405	235445848	739864	1.45408e+08	35.7981	1.52044e-07	15.2044
		SIP_700_Bin8	700mSIPHEX1_8_scaffold_517_c1	700mSIPHEX1	4061898	21477	700mSIPHEX1	37.8116	235445848	812080	1.45408e+08	35.7981	1.52044e-07	15.2044
		SIP_700_Bin8	700mSIPHEX1_8_scaffold_566_c1	700mSIPHEX1	4061898	19298	700mSIPHEX1	50.402	235445848	972658	1.45408e+08	35.7981	1.52044e-07	15.2044
		SIP_700_Bin8	700mSIPHEX1_8_scaffold_574_c1	700mSIPHEX1	4061898	18945	700mSIPHEX1	39.0871	235445848	740505	1.45408e+08	35.7981	1.52044e-07	15.2044
		SIP_700_Bin8	700mSIPHEX1_8_scaffold_673_c1	700mSIPHEX1	4061898	15364	700mSIPHEX1	34.1914	235445848	525317	1.45408e+08	35.7981	1.52044e-07	15.2044
		SIP_700_Bin8	700mSIPHEX1_8_scaffold_680_c1	700mSIPHEX1	4061898	15167	700mSIPHEX1	29.8886	235445848	453320	1.45408e+08	35.7981	1.52044e-07	15.2044
		SIP_700_Bin8	700mSIPHEX1_8_scaffold_693_c1	700mSIPHEX1	4061898	14772	700mSIPHEX1	37.6963	235445848	556850	1.45408e+08	35.7981	1.52044e-07	15.2044
		SIP_700_Bin8	700mSIPHEX1_8_scaffold_695_c1	700mSIPHEX1	4061898	14702	700mSIPHEX1	38.1986	235445848	561596	1.45408e+08	35.7981	1.52044e-07	15.2044
		SIP_700_Bin8	700mSIPHEX1_8_scaffold_815_c1	700mSIPHEX1	4061898	11960	700mSIPHEX1	36.0296	235445848	430914	1.45408e+08	35.7981	1.52044e-07	15.2044
		SIP_700_Bin8	700mSIPHEX1_8_scaffold_964_c1	700mSIPHEX1	4061898	9161	700mSIPHEX1	39.6188	235445848	362948	1.45408e+08	35.7981	1.52044e-07	15.2044
		SIP_700_Bin8	700mSIPHEX1_8_scaffold_978_c1	700mSIPHEX1	4061898	8986	700mSIPHEX1	35.1399	235445848	315767	1.45408e+08	35.7981	1.52044e-07	15.2044
		SIP_700_Bin8	700mSIPHEX1_8_scaffold_1072_c1	700mSIPHEX1	4061898	7894	700mSIPHEX1	35.9542	235445848	283822	1.45408e+08	35.7981	1.52044e-07	15.2044
		SIP_700_Bin8	700mSIPHEX1_8_scaffold_1100_c1	700mSIPHEX1	4061898	7634	700mSIPHEX1	44.4388	235445848	339246	1.45408e+08	35.7981	1.52044e-07	15.2044
		SIP_700_Bin8	700mSIPHEX1_8_scaffold_1124_c1	700mSIPHEX1	4061898	7397	700mSIPHEX1	35.7197	235445848	264219	1.45408e+08	35.7981	1.52044e-07	15.2044
		SIP_700_Bin8	700mSIPHEX1_8_scaffold_1501_c1	700mSIPHEX1	4061898	5475	700mSIPHEX1	35.4935	235445848	194327	1.45408e+08	35.7981	1.52044e-07	15.2044
		SIP_700_Bin8	700mSIPHEX1_8_scaffold_1702_c1	700mSIPHEX1	4061898	4878	700mSIPHEX1	36.7223	235445848	179131	1.45408e+08	35.7981	1.52044e-07	15.2044
		SIP_700_Bin8	700mSIPHEX1_8_scaffold_1739_c1	700mSIPHEX1	4061898	4809	700mSIPHEX1	33.7697	235445848	162398	1.45408e+08	35.7981	1.52044e-07	15.2044
		SIP_700_Bin8	700mSIPHEX1_8_scaffold_1978_c1	700mSIPHEX1	4061898	4301	700mSIPHEX1	38.3888	235445848	165110	1.45408e+08	35.7981	1.52044e-07	15.2044
		SIP_700_Bin8	700mSIPHEX1_8_scaffold_4556_c1	700mSIPHEX1	4061898	2204	700mSIPHEX1	38.2264	235445848	84251	1.45408e+08	35.7981	1.52044e-07	15.2044
		SIP_700_Bin8	700mSIPHEX1_8_scaffold_5201_c1	700mSIPHEX1	4061898	2001	700mSIPHEX1	31.7266	235445848	63484.9	1.45408e+08	35.7981	1.52044e-07	15.2044
		SIP_700_Bin2	700mSIPHEX1_2_scaffold_56_c1	700mSIPHEX1	4000208	229671	700mSIPHEX1	48.5011	235445848	1.11393e+07	1.93496e+08	48.3715	2.05446e-07	20.5446
		SIP_700_Bin2	700mSIPHEX1_2_scaffold_87_c1	700mSIPHEX1	4000208	139290	700mSIPHEX1	46.6362	235445848	6.49596e+06	1.93496e+08	48.3715	2.05446e-07	20.5446
		SIP_700_Bin2	700mSIPHEX1_2_scaffold_112_c1	700mSIPHEX1	4000208	113105	700mSIPHEX1	48.5619	235445848	5.49259e+06	1.93496e+08	48.3715	2.05446e-07	20.5446
		SIP_700_Bin2	700mSIPHEX1_2_scaffold_120_c1	700mSIPHEX1	4000208	109252	700mSIPHEX1	48.3993	235445848	5.28772e+06	1.93496e+08	48.3715	2.05446e-07	20.5446
		SIP_700_Bin2	700mSIPHEX1_2_scaffold_125_c1	700mSIPHEX1	4000208	101182	700mSIPHEX1	49.4578	235445848	5.00424e+06	1.93496e+08	48.3715	2.05446e-07	20.5446
		SIP_700_Bin2	700mSIPHEX1_2_scaffold_128_c1	700mSIPHEX1	4000208	100473	700mSIPHEX1	50.5742	235445848	5.08134e+06	1.93496e+08	48.3715	2.05446e-07	20.5446
		SIP_700_Bin2	700mSIPHEX1_2_scaffold_139_c1	700mSIPHEX1	4000208	92861	700mSIPHEX1	50.4519	235445848	4.68501e+06	1.93496e+08	48.3715	2.05446e-07	20.5446
		SIP_700_Bin2	700mSIPHEX1_2_scaffold_144_c1	700mSIPHEX1	4000208	88988	700mSIPHEX1	48.9347	235445848	4.3546e+06	1.93496e+08	48.3715	2.05446e-07	20.5446
		SIP_700_Bin2	700mSIPHEX1_2_scaffold_146_c1	700mSIPHEX1	4000208	87182	700mSIPHEX1	49.3361	235445848	4.30122e+06	1.93496e+08	48.3715	2.05446e-07	20.5446
		SIP_700_Bin2	700mSIPHEX1_2_scaffold_150_c1	700mSIPHEX1	4000208	85486	700mSIPHEX1	48.3883	235445848	4.13652e+06	1.93496e+08	48.3715	2.05446e-07	20.5446
		SIP_700_Bin2	700mSIPHEX1_2_scaffold_153_c1	700mSIPHEX1	4000208	84081	700mSIPHEX1	49.7589	235445848	4.18378e+06	1.93496e+08	48.3715	2.05446e-07	20.5446
		SIP_700_Bin2	700mSIPHEX1_2_scaffold_163_c1	700mSIPHEX1	4000208	78778	700mSIPHEX1	47.7121	235445848	3.75866e+06	1.93496e+08	48.3715	2.05446e-07	20.5446
		SIP_700_Bin2	700mSIPHEX1_2_scaffold_166_c1	700mSIPHEX1	4000208	76628	700mSIPHEX1	49.9334	235445848	3.8263e+06	1.93496e+08	48.3715	2.05446e-07	20.5446
		SIP_700_Bin2	700mSIPHEX1_2_scaffold_167_c1	700mSIPHEX1	4000208	76503	700mSIPHEX1	49.3588	235445848	3.7761e+06	1.93496e+08	48.3715	2.05446e-07	20.5446
		SIP_700_Bin2	700mSIPHEX1_2_scaffold_169_c1	700mSIPHEX1	4000208	75913	700mSIPHEX1	47.3687	235445848	3.5959e+06	1.93496e+08	48.3715	2.05446e-07	20.5446
		SIP_700_Bin2	700mSIPHEX1_2_scaffold_175_c1	700mSIPHEX1	4000208	73777	700mSIPHEX1	47.929	235445848	3.53606e+06	1.93496e+08	48.3715	2.05446e-07	20.5446
		SIP_700_Bin2	700mSIPHEX1_2_scaffold_176_c1	700mSIPHEX1	4000208	73496	700mSIPHEX1	44.6663	235445848	3.28279e+06	1.93496e+08	48.3715	2.05446e-07	20.5446
		SIP_700_Bin2	700mSIPHEX1_2_scaffold_180_c1	700mSIPHEX1	4000208	70802	700mSIPHEX1	48.4195	235445848	3.4282e+06	1.93496e+08	48.3715	2.05446e-07	20.5446
		SIP_700_Bin2	700mSIPHEX1_2_scaffold_182_c1	700mSIPHEX1	4000208	69454	700mSIPHEX1	46.894	235445848	3.25698e+06	1.93496e+08	48.3715	2.05446e-07	20.5446
		SIP_700_Bin2	700mSIPHEX1_2_scaffold_186_c1	700mSIPHEX1	4000208	68285	700mSIPHEX1	47.8456	235445848	3.26714e+06	1.93496e+08	48.3715	2.05446e-07	20.5446
		SIP_700_Bin2	700mSIPHEX1_2_scaffold_191_c1	700mSIPHEX1	4000208	66556	700mSIPHEX1	50.502	235445848	3.36121e+06	1.93496e+08	48.3715	2.05446e-07	20.5446
		SIP_700_Bin2	700mSIPHEX1_2_scaffold_202_c1	700mSIPHEX1	4000208	60874	700mSIPHEX1	46.6312	235445848	2.83863e+06	1.93496e+08	48.3715	2.05446e-07	20.5446
		SIP_700_Bin2	700mSIPHEX1_2_scaffold_207_c1	700mSIPHEX1	4000208	58787	700mSIPHEX1	46.2767	235445848	2.72047e+06	1.93496e+08	48.3715	2.05446e-07	20.5446
		SIP_700_Bin2	700mSIPHEX1_2_scaffold_208_c1	700mSIPHEX1	4000208	58741	700mSIPHEX1	48.6889	235445848	2.86003e+06	1.93496e+08	48.3715	2.05446e-07	20.5446
		SIP_700_Bin2	700mSIPHEX1_2_scaffold_212_c1	700mSIPHEX1	4000208	58056	700mSIPHEX1	48.0686	235445848	2.79067e+06	1.93496e+08	48.3715	2.05446e-07	20.5446
		SIP_700_Bin2	700mSIPHEX1_2_scaffold_213_c1	700mSIPHEX1	4000208	58048	700mSIPHEX1	46.7656	235445848	2.71465e+06	1.93496e+08	48.3715	2.05446e-07	20.5446
		SIP_700_Bin2	700mSIPHEX1_2_scaffold_218_c1	700mSIPHEX1	4000208	57033	700mSIPHEX1	49.4204	235445848	2.81859e+06	1.93496e+08	48.3715	2.05446e-07	20.5446
		SIP_700_Bin2	700mSIPHEX1_2_scaffold_219_c1	700mSIPHEX1	4000208	56343	700mSIPHEX1	47.2021	235445848	2.65951e+06	1.93496e+08	48.3715	2.05446e-07	20.5446
		SIP_700_Bin2	700mSIPHEX1_2_scaffold_220_c1	700mSIPHEX1	4000208	56253	700mSIPHEX1	45.496	235445848	2.55929e+06	1.93496e+08	48.3715	2.05446e-07	20.5446
		SIP_700_Bin2	700mSIPHEX1_2_scaffold_221_c1	700mSIPHEX1	4000208	56087	700mSIPHEX1	49.721	235445848	2.7887e+06	1.93496e+08	48.3715	2.05446e-07	20.5446
		SIP_700_Bin2	700mSIPHEX1_2_scaffold_225_c1	700mSIPHEX1	4000208	55000	700mSIPHEX1	48.2038	235445848	2651209	1.93496e+08	48.3715	2.05446e-07	20.5446
		SIP_700_Bin2	700mSIPHEX1_2_scaffold_238_c1	700mSIPHEX1	4000208	52021	700mSIPHEX1	46.8279	235445848	2.43603e+06	1.93496e+08	48.3715	2.05446e-07	20.5446
		SIP_700_Bin2	700mSIPHEX1_2_scaffold_239_c1	700mSIPHEX1	4000208	51909	700mSIPHEX1	48.9488	235445848	2.54088e+06	1.93496e+08	48.3715	2.05446e-07	20.5446
		SIP_700_Bin2	700mSIPHEX1_2_scaffold_243_c1	700mSIPHEX1	4000208	50747	700mSIPHEX1	49.1925	235445848	2.49637e+06	1.93496e+08	48.3715	2.05446e-07	20.5446
		SIP_700_Bin2	700mSIPHEX1_2_scaffold_255_c1	700mSIPHEX1	4000208	47664	700mSIPHEX1	49.9064	235445848	2.37874e+06	1.93496e+08	48.3715	2.05446e-07	20.5446
		SIP_700_Bin2	700mSIPHEX1_2_scaffold_269_c1	700mSIPHEX1	4000208	45334	700mSIPHEX1	49.2443	235445848	2.23244e+06	1.93496e+08	48.3715	2.05446e-07	20.5446
		SIP_700_Bin2	700mSIPHEX1_2_scaffold_273_c1	700mSIPHEX1	4000208	44630	700mSIPHEX1	47.8017	235445848	2.13339e+06	1.93496e+08	48.3715	2.05446e-07	20.5446
		SIP_700_Bin2	700mSIPHEX1_2_scaffold_289_c1	700mSIPHEX1	4000208	42380	700mSIPHEX1	46.8192	235445848	1.9842e+06	1.93496e+08	48.3715	2.05446e-07	20.5446
		SIP_700_Bin2	700mSIPHEX1_2_scaffold_298_c1	700mSIPHEX1	4000208	40616	700mSIPHEX1	46.6009	235445848	1.89274e+06	1.93496e+08	48.3715	2.05446e-07	20.5446
		SIP_700_Bin2	700mSIPHEX1_2_scaffold_336_c1	700mSIPHEX1	4000208	36459	700mSIPHEX1	44.3374	235445848	1.6165e+06	1.93496e+08	48.3715	2.05446e-07	20.5446
		SIP_700_Bin2	700mSIPHEX1_2_scaffold_339_c1	700mSIPHEX1	4000208	36245	700mSIPHEX1	48.9292	235445848	1.77344e+06	1.93496e+08	48.3715	2.05446e-07	20.5446
		SIP_700_Bin2	700mSIPHEX1_2_scaffold_347_c1	700mSIPHEX1	4000208	35434	700mSIPHEX1	46.9399	235445848	1.66327e+06	1.93496e+08	48.3715	2.05446e-07	20.5446
		SIP_700_Bin2	700mSIPHEX1_2_scaffold_373_c1	700mSIPHEX1	4000208	32296	700mSIPHEX1	47.819	235445848	1.54436e+06	1.93496e+08	48.3715	2.05446e-07	20.5446
		SIP_700_Bin2	700mSIPHEX1_2_scaffold_396_c1	700mSIPHEX1	4000208	30696	700mSIPHEX1	48.8558	235445848	1.49968e+06	1.93496e+08	48.3715	2.05446e-07	20.5446
		SIP_700_Bin2	700mSIPHEX1_2_scaffold_421_c1	700mSIPHEX1	4000208	28057	700mSIPHEX1	48.7533	235445848	1.36787e+06	1.93496e+08	48.3715	2.05446e-07	20.5446
		SIP_700_Bin2	700mSIPHEX1_2_scaffold_432_c1	700mSIPHEX1	4000208	27191	700mSIPHEX1	53.3227	235445848	1.4499e+06	1.93496e+08	48.3715	2.05446e-07	20.5446
		SIP_700_Bin2	700mSIPHEX1_2_scaffold_435_c1	700mSIPHEX1	4000208	27000	700mSIPHEX1	47.9479	235445848	1.29459e+06	1.93496e+08	48.3715	2.05446e-07	20.5446
		SIP_700_Bin2	700mSIPHEX1_2_scaffold_450_c1	700mSIPHEX1	4000208	25982	700mSIPHEX1	49.9943	235445848	1.29895e+06	1.93496e+08	48.3715	2.05446e-07	20.5446
		SIP_700_Bin2	700mSIPHEX1_2_scaffold_456_c1	700mSIPHEX1	4000208	25131	700mSIPHEX1	51.0896	235445848	1.28393e+06	1.93496e+08	48.3715	2.05446e-07	20.5446
		SIP_700_Bin2	700mSIPHEX1_2_scaffold_457_c1	700mSIPHEX1	4000208	24978	700mSIPHEX1	49.7848	235445848	1.24352e+06	1.93496e+08	48.3715	2.05446e-07	20.5446
		SIP_700_Bin2	700mSIPHEX1_2_scaffold_459_c1	700mSIPHEX1	4000208	24955	700mSIPHEX1	50.267	235445848	1.25441e+06	1.93496e+08	48.3715	2.05446e-07	20.5446
		SIP_700_Bin2	700mSIPHEX1_2_scaffold_473_c1	700mSIPHEX1	4000208	23947	700mSIPHEX1	49.2905	235445848	1.18036e+06	1.93496e+08	48.3715	2.05446e-07	20.5446
		SIP_700_Bin2	700mSIPHEX1_2_scaffold_490_c1	700mSIPHEX1	4000208	22877	700mSIPHEX1	48.4383	235445848	1.10812e+06	1.93496e+08	48.3715	2.05446e-07	20.5446
		SIP_700_Bin2	700mSIPHEX1_2_scaffold_493_c1	700mSIPHEX1	4000208	22750	700mSIPHEX1	48.4504	235445848	1.10225e+06	1.93496e+08	48.3715	2.05446e-07	20.5446
		SIP_700_Bin2	700mSIPHEX1_2_scaffold_497_c1	700mSIPHEX1	4000208	22580	700mSIPHEX1	48.1862	235445848	1.08804e+06	1.93496e+08	48.3715	2.05446e-07	20.5446
		SIP_700_Bin2	700mSIPHEX1_2_scaffold_504_c1	700mSIPHEX1	4000208	22322	700mSIPHEX1	47.2112	235445848	1.05385e+06	1.93496e+08	48.3715	2.05446e-07	20.5446
		SIP_700_Bin2	700mSIPHEX1_2_scaffold_540_c1	700mSIPHEX1	4000208	20509	700mSIPHEX1	51.1532	235445848	1.0491e+06	1.93496e+08	48.3715	2.05446e-07	20.5446
		SIP_700_Bin2	700mSIPHEX1_2_scaffold_550_c1	700mSIPHEX1	4000208	20135	700mSIPHEX1	46.3826	235445848	933914	1.93496e+08	48.3715	2.05446e-07	20.5446
		SIP_700_Bin2	700mSIPHEX1_2_scaffold_551_c1	700mSIPHEX1	4000208	20130	700mSIPHEX1	49.6103	235445848	998655	1.93496e+08	48.3715	2.05446e-07	20.5446
		SIP_700_Bin2	700mSIPHEX1_2_scaffold_569_c1	700mSIPHEX1	4000208	19223	700mSIPHEX1	49.6878	235445848	955149	1.93496e+08	48.3715	2.05446e-07	20.5446
		SIP_700_Bin2	700mSIPHEX1_2_scaffold_577_c1	700mSIPHEX1	4000208	18747	700mSIPHEX1	48.7144	235445848	913249	1.93496e+08	48.3715	2.05446e-07	20.5446
		SIP_700_Bin2	700mSIPHEX1_2_scaffold_586_c1	700mSIPHEX1	4000208	18176	700mSIPHEX1	51.4738	235445848	935588	1.93496e+08	48.3715	2.05446e-07	20.5446
		SIP_700_Bin2	700mSIPHEX1_2_scaffold_588_c1	700mSIPHEX1	4000208	18111	700mSIPHEX1	44.7361	235445848	810216	1.93496e+08	48.3715	2.05446e-07	20.5446
		SIP_700_Bin2	700mSIPHEX1_2_scaffold_590_c1	700mSIPHEX1	4000208	18063	700mSIPHEX1	47.1718	235445848	852064	1.93496e+08	48.3715	2.05446e-07	20.5446
		SIP_700_Bin2	700mSIPHEX1_2_scaffold_616_c1	700mSIPHEX1	4000208	17030	700mSIPHEX1	50.4068	235445848	858428	1.93496e+08	48.3715	2.05446e-07	20.5446
		SIP_700_Bin2	700mSIPHEX1_2_scaffold_624_c1	700mSIPHEX1	4000208	16712	700mSIPHEX1	49.5372	235445848	827866	1.93496e+08	48.3715	2.05446e-07	20.5446
		SIP_700_Bin2	700mSIPHEX1_2_scaffold_630_c1	700mSIPHEX1	4000208	16618	700mSIPHEX1	50.1064	235445848	832668	1.93496e+08	48.3715	2.05446e-07	20.5446
		SIP_700_Bin2	700mSIPHEX1_2_scaffold_631_c1	700mSIPHEX1	4000208	16614	700mSIPHEX1	48.0986	235445848	799110	1.93496e+08	48.3715	2.05446e-07	20.5446
		SIP_700_Bin2	700mSIPHEX1_2_scaffold_641_c1	700mSIPHEX1	4000208	16295	700mSIPHEX1	48.1342	235445848	784347	1.93496e+08	48.3715	2.05446e-07	20.5446
		SIP_700_Bin2	700mSIPHEX1_2_scaffold_646_c1	700mSIPHEX1	4000208	16114	700mSIPHEX1	49.6358	235445848	799831	1.93496e+08	48.3715	2.05446e-07	20.5446
		SIP_700_Bin2	700mSIPHEX1_2_scaffold_653_c1	700mSIPHEX1	4000208	15953	700mSIPHEX1	64.2648	235445848	1.02522e+06	1.93496e+08	48.3715	2.05446e-07	20.5446
		SIP_700_Bin2	700mSIPHEX1_2_scaffold_656_c1	700mSIPHEX1	4000208	15894	700mSIPHEX1	30.4317	235445848	483681	1.93496e+08	48.3715	2.05446e-07	20.5446
		SIP_700_Bin2	700mSIPHEX1_2_scaffold_667_c1	700mSIPHEX1	4000208	15566	700mSIPHEX1	51.1781	235445848	796638	1.93496e+08	48.3715	2.05446e-07	20.5446
		SIP_700_Bin2	700mSIPHEX1_2_scaffold_674_c1	700mSIPHEX1	4000208	15335	700mSIPHEX1	44.4441	235445848	681550	1.93496e+08	48.3715	2.05446e-07	20.5446
		SIP_700_Bin2	700mSIPHEX1_2_scaffold_679_c1	700mSIPHEX1	4000208	15202	700mSIPHEX1	50.7986	235445848	772240	1.93496e+08	48.3715	2.05446e-07	20.5446
		SIP_700_Bin2	700mSIPHEX1_2_scaffold_683_c1	700mSIPHEX1	4000208	15055	700mSIPHEX1	46.8721	235445848	705659	1.93496e+08	48.3715	2.05446e-07	20.5446
		SIP_700_Bin2	700mSIPHEX1_2_scaffold_697_c1	700mSIPHEX1	4000208	14649	700mSIPHEX1	45.1088	235445848	660799	1.93496e+08	48.3715	2.05446e-07	20.5446
		SIP_700_Bin2	700mSIPHEX1_2_scaffold_712_c1	700mSIPHEX1	4000208	14213	700mSIPHEX1	48.1371	235445848	684173	1.93496e+08	48.3715	2.05446e-07	20.5446
		SIP_700_Bin2	700mSIPHEX1_2_scaffold_730_c1	700mSIPHEX1	4000208	13591	700mSIPHEX1	51.9086	235445848	705490	1.93496e+08	48.3715	2.05446e-07	20.5446
		SIP_700_Bin2	700mSIPHEX1_2_scaffold_743_c1	700mSIPHEX1	4000208	13367	700mSIPHEX1	45.6184	235445848	609781	1.93496e+08	48.3715	2.05446e-07	20.5446
		SIP_700_Bin2	700mSIPHEX1_2_scaffold_760_c1	700mSIPHEX1	4000208	12917	700mSIPHEX1	50.7248	235445848	655212	1.93496e+08	48.3715	2.05446e-07	20.5446
		SIP_700_Bin2	700mSIPHEX1_2_scaffold_765_c1	700mSIPHEX1	4000208	12826	700mSIPHEX1	52.4738	235445848	673029	1.93496e+08	48.3715	2.05446e-07	20.5446
		SIP_700_Bin2	700mSIPHEX1_2_scaffold_807_c1	700mSIPHEX1	4000208	12109	700mSIPHEX1	54.0057	235445848	653955	1.93496e+08	48.3715	2.05446e-07	20.5446
		SIP_700_Bin2	700mSIPHEX1_2_scaffold_838_c1	700mSIPHEX1	4000208	11289	700mSIPHEX1	49.3633	235445848	557262	1.93496e+08	48.3715	2.05446e-07	20.5446
		SIP_700_Bin2	700mSIPHEX1_2_scaffold_848_c1	700mSIPHEX1	4000208	11108	700mSIPHEX1	46.2706	235445848	513974	1.93496e+08	48.3715	2.05446e-07	20.5446
		SIP_700_Bin2	700mSIPHEX1_2_scaffold_904_c1	700mSIPHEX1	4000208	10085	700mSIPHEX1	48.7882	235445848	492029	1.93496e+08	48.3715	2.05446e-07	20.5446
		SIP_700_Bin2	700mSIPHEX1_2_scaffold_915_c1	700mSIPHEX1	4000208	9890	700mSIPHEX1	48.5328	235445848	479989	1.93496e+08	48.3715	2.05446e-07	20.5446
		SIP_700_Bin2	700mSIPHEX1_2_scaffold_949_c1	700mSIPHEX1	4000208	9429	700mSIPHEX1	49.9504	235445848	470982	1.93496e+08	48.3715	2.05446e-07	20.5446
		SIP_700_Bin2	700mSIPHEX1_2_scaffold_955_c1	700mSIPHEX1	4000208	9340	700mSIPHEX1	53.2606	235445848	497454	1.93496e+08	48.3715	2.05446e-07	20.5446
		SIP_700_Bin2	700mSIPHEX1_2_scaffold_963_c1	700mSIPHEX1	4000208	9174	700mSIPHEX1	45.261	235445848	415224	1.93496e+08	48.3715	2.05446e-07	20.5446
		SIP_700_Bin2	700mSIPHEX1_2_scaffold_977_c1	700mSIPHEX1	4000208	9014	700mSIPHEX1	48.6079	235445848	438152	1.93496e+08	48.3715	2.05446e-07	20.5446
		SIP_700_Bin2	700mSIPHEX1_2_scaffold_1005_c1	700mSIPHEX1	4000208	8584	700mSIPHEX1	51.0853	235445848	438516	1.93496e+08	48.3715	2.05446e-07	20.5446
		SIP_700_Bin2	700mSIPHEX1_2_scaffold_1029_c1	700mSIPHEX1	4000208	8323	700mSIPHEX1	45.0597	235445848	375032	1.93496e+08	48.3715	2.05446e-07	20.5446
		SIP_700_Bin2	700mSIPHEX1_2_scaffold_1092_c1	700mSIPHEX1	4000208	7704	700mSIPHEX1	51.1651	235445848	394176	1.93496e+08	48.3715	2.05446e-07	20.5446
		SIP_700_Bin2	700mSIPHEX1_2_scaffold_1096_c1	700mSIPHEX1	4000208	7691	700mSIPHEX1	46.3838	235445848	356738	1.93496e+08	48.3715	2.05446e-07	20.5446
		SIP_700_Bin2	700mSIPHEX1_2_scaffold_1119_c1	700mSIPHEX1	4000208	7427	700mSIPHEX1	51.0078	235445848	378835	1.93496e+08	48.3715	2.05446e-07	20.5446
		SIP_700_Bin2	700mSIPHEX1_2_scaffold_1126_c1	700mSIPHEX1	4000208	7365	700mSIPHEX1	25.7902	235445848	189945	1.93496e+08	48.3715	2.05446e-07	20.5446
		SIP_700_Bin2	700mSIPHEX1_2_scaffold_1175_c1	700mSIPHEX1	4000208	6988	700mSIPHEX1	45.1325	235445848	315386	1.93496e+08	48.3715	2.05446e-07	20.5446
		SIP_700_Bin2	700mSIPHEX1_2_scaffold_1321_c1	700mSIPHEX1	4000208	6099	700mSIPHEX1	44.6599	235445848	272381	1.93496e+08	48.3715	2.05446e-07	20.5446
		SIP_700_Bin2	700mSIPHEX1_2_scaffold_1369_c1	700mSIPHEX1	4000208	5927	700mSIPHEX1	43.256	235445848	256378	1.93496e+08	48.3715	2.05446e-07	20.5446
		SIP_700_Bin2	700mSIPHEX1_2_scaffold_1382_c1	700mSIPHEX1	4000208	5887	700mSIPHEX1	48.2974	235445848	284327	1.93496e+08	48.3715	2.05446e-07	20.5446
		SIP_700_Bin2	700mSIPHEX1_2_scaffold_1494_c1	700mSIPHEX1	4000208	5505	700mSIPHEX1	44.8672	235445848	246994	1.93496e+08	48.3715	2.05446e-07	20.5446
		SIP_700_Bin2	700mSIPHEX1_2_scaffold_1610_c1	700mSIPHEX1	4000208	5115	700mSIPHEX1	52.5404	235445848	268744	1.93496e+08	48.3715	2.05446e-07	20.5446
		SIP_700_Bin2	700mSIPHEX1_2_scaffold_1631_c1	700mSIPHEX1	4000208	5064	700mSIPHEX1	52.9851	235445848	268317	1.93496e+08	48.3715	2.05446e-07	20.5446
		SIP_700_Bin2	700mSIPHEX1_2_scaffold_1825_c1	700mSIPHEX1	4000208	4610	700mSIPHEX1	43.6087	235445848	201036	1.93496e+08	48.3715	2.05446e-07	20.5446
		SIP_700_Bin2	700mSIPHEX1_2_scaffold_2967_c1	700mSIPHEX1	4000208	3053	700mSIPHEX1	49.815	235445848	152085	1.93496e+08	48.3715	2.05446e-07	20.5446
		SIP_700_Bin2	700mSIPHEX1_2_scaffold_3214_c1	700mSIPHEX1	4000208	2878	700mSIPHEX1	45.4586	235445848	130830	1.93496e+08	48.3715	2.05446e-07	20.5446
		SIP_700_Bin2	700mSIPHEX1_2_scaffold_4252_c1	700mSIPHEX1	4000208	2319	700mSIPHEX1	31.2619	235445848	72496.3	1.93496e+08	48.3715	2.05446e-07	20.5446
		SIP_700_Bin0	700mSIPHEX1_0_scaffold_372_c1	700mSIPHEX1	1881949	32347	700mSIPHEX1	20.3755	235445848	659086	2.13414e+07	11.34	4.81641e-08	4.81641
		SIP_700_Bin0	700mSIPHEX1_0_scaffold_560_c1	700mSIPHEX1	1881949	19621	700mSIPHEX1	11.1563	235445848	218898	2.13414e+07	11.34	4.81641e-08	4.81641
		SIP_700_Bin0	700mSIPHEX1_0_scaffold_597_c1	700mSIPHEX1	1881949	17841	700mSIPHEX1	9.87236	235445848	176133	2.13414e+07	11.34	4.81641e-08	4.81641
		SIP_700_Bin0	700mSIPHEX1_0_scaffold_617_c1	700mSIPHEX1	1881949	17011	700mSIPHEX1	9.73537	235445848	165608	2.13414e+07	11.34	4.81641e-08	4.81641
		SIP_700_Bin0	700mSIPHEX1_0_scaffold_676_c1	700mSIPHEX1	1881949	15315	700mSIPHEX1	8.94507	235445848	136994	2.13414e+07	11.34	4.81641e-08	4.81641
		SIP_700_Bin0	700mSIPHEX1_0_scaffold_681_c1	700mSIPHEX1	1881949	15078	700mSIPHEX1	19.8119	235445848	298724	2.13414e+07	11.34	4.81641e-08	4.81641
		SIP_700_Bin0	700mSIPHEX1_0_scaffold_463_c2	700mSIPHEX1	1881949	13620	700mSIPHEX1	12.3843	235445848	168674	2.13414e+07	11.34	4.81641e-08	4.81641
		SIP_700_Bin0	700mSIPHEX1_0_scaffold_728_c1	700mSIPHEX1	1881949	13612	700mSIPHEX1	9.13289	235445848	124317	2.13414e+07	11.34	4.81641e-08	4.81641
		SIP_700_Bin0	700mSIPHEX1_0_scaffold_739_c1	700mSIPHEX1	1881949	13429	700mSIPHEX1	10.9547	235445848	147111	2.13414e+07	11.34	4.81641e-08	4.81641
		SIP_700_Bin0	700mSIPHEX1_0_scaffold_768_c1	700mSIPHEX1	1881949	12794	700mSIPHEX1	10.2406	235445848	131018	2.13414e+07	11.34	4.81641e-08	4.81641
		SIP_700_Bin0	700mSIPHEX1_0_scaffold_779_c1	700mSIPHEX1	1881949	12632	700mSIPHEX1	7.06626	235445848	89261	2.13414e+07	11.34	4.81641e-08	4.81641
		SIP_700_Bin0	700mSIPHEX1_0_scaffold_803_c1	700mSIPHEX1	1881949	12148	700mSIPHEX1	8.38773	235445848	101894	2.13414e+07	11.34	4.81641e-08	4.81641
		SIP_700_Bin0	700mSIPHEX1_0_scaffold_897_c1	700mSIPHEX1	1881949	10261	700mSIPHEX1	10.5368	235445848	108118	2.13414e+07	11.34	4.81641e-08	4.81641
		SIP_700_Bin0	700mSIPHEX1_0_scaffold_922_c1	700mSIPHEX1	1881949	9726	700mSIPHEX1	9.13137	235445848	88811.7	2.13414e+07	11.34	4.81641e-08	4.81641
		SIP_700_Bin0	700mSIPHEX1_0_scaffold_931_c1	700mSIPHEX1	1881949	9641	700mSIPHEX1	12.814	235445848	123540	2.13414e+07	11.34	4.81641e-08	4.81641
		SIP_700_Bin0	700mSIPHEX1_0_scaffold_943_c1	700mSIPHEX1	1881949	9538	700mSIPHEX1	15.3299	235445848	146217	2.13414e+07	11.34	4.81641e-08	4.81641
		SIP_700_Bin0	700mSIPHEX1_0_scaffold_948_c1	700mSIPHEX1	1881949	9439	700mSIPHEX1	10.9225	235445848	103097	2.13414e+07	11.34	4.81641e-08	4.81641
		SIP_700_Bin0	700mSIPHEX1_0_scaffold_971_c1	700mSIPHEX1	1881949	9087	700mSIPHEX1	12.668	235445848	115114	2.13414e+07	11.34	4.81641e-08	4.81641
		SIP_700_Bin0	700mSIPHEX1_0_scaffold_989_c1	700mSIPHEX1	1881949	8810	700mSIPHEX1	11.8972	235445848	104814	2.13414e+07	11.34	4.81641e-08	4.81641
		SIP_700_Bin0	700mSIPHEX1_0_scaffold_990_c1	700mSIPHEX1	1881949	8807	700mSIPHEX1	11.2567	235445848	99137.8	2.13414e+07	11.34	4.81641e-08	4.81641
		SIP_700_Bin0	700mSIPHEX1_0_scaffold_996_c1	700mSIPHEX1	1881949	8697	700mSIPHEX1	9.43068	235445848	82018.6	2.13414e+07	11.34	4.81641e-08	4.81641
		SIP_700_Bin0	700mSIPHEX1_0_scaffold_997_c1	700mSIPHEX1	1881949	8691	700mSIPHEX1	11.0577	235445848	96102.5	2.13414e+07	11.34	4.81641e-08	4.81641
		SIP_700_Bin0	700mSIPHEX1_0_scaffold_1002_c1	700mSIPHEX1	1881949	8630	700mSIPHEX1	11.5493	235445848	99670.5	2.13414e+07	11.34	4.81641e-08	4.81641
		SIP_700_Bin0	700mSIPHEX1_0_scaffold_1003_c1	700mSIPHEX1	1881949	8605	700mSIPHEX1	11.1755	235445848	96165.2	2.13414e+07	11.34	4.81641e-08	4.81641
		SIP_700_Bin0	700mSIPHEX1_0_scaffold_1025_c1	700mSIPHEX1	1881949	8380	700mSIPHEX1	12.6571	235445848	106066	2.13414e+07	11.34	4.81641e-08	4.81641
		SIP_700_Bin0	700mSIPHEX1_0_scaffold_1042_c1	700mSIPHEX1	1881949	8201	700mSIPHEX1	11.3519	235445848	93096.9	2.13414e+07	11.34	4.81641e-08	4.81641
		SIP_700_Bin0	700mSIPHEX1_0_scaffold_1043_c1	700mSIPHEX1	1881949	8174	700mSIPHEX1	10.9001	235445848	89097.4	2.13414e+07	11.34	4.81641e-08	4.81641
		SIP_700_Bin0	700mSIPHEX1_0_scaffold_1059_c1	700mSIPHEX1	1881949	7966	700mSIPHEX1	9.95343	235445848	79289	2.13414e+07	11.34	4.81641e-08	4.81641
		SIP_700_Bin0	700mSIPHEX1_0_scaffold_1060_c1	700mSIPHEX1	1881949	7961	700mSIPHEX1	11.1536	235445848	88793.8	2.13414e+07	11.34	4.81641e-08	4.81641
		SIP_700_Bin0	700mSIPHEX1_0_scaffold_1065_c1	700mSIPHEX1	1881949	7943	700mSIPHEX1	11.2895	235445848	89672.5	2.13414e+07	11.34	4.81641e-08	4.81641
		SIP_700_Bin0	700mSIPHEX1_0_scaffold_1068_c1	700mSIPHEX1	1881949	7918	700mSIPHEX1	11.151	235445848	88293.6	2.13414e+07	11.34	4.81641e-08	4.81641
		SIP_700_Bin0	700mSIPHEX1_0_scaffold_723_c3	700mSIPHEX1	1881949	7843	700mSIPHEX1	9.86637	235445848	77381.9	2.13414e+07	11.34	4.81641e-08	4.81641
		SIP_700_Bin0	700mSIPHEX1_0_scaffold_1082_c1	700mSIPHEX1	1881949	7764	700mSIPHEX1	8.39506	235445848	65179.2	2.13414e+07	11.34	4.81641e-08	4.81641
		SIP_700_Bin0	700mSIPHEX1_0_scaffold_1083_c1	700mSIPHEX1	1881949	7754	700mSIPHEX1	8.79169	235445848	68170.8	2.13414e+07	11.34	4.81641e-08	4.81641
		SIP_700_Bin0	700mSIPHEX1_0_scaffold_1089_c1	700mSIPHEX1	1881949	7721	700mSIPHEX1	10.2198	235445848	78907.1	2.13414e+07	11.34	4.81641e-08	4.81641
		SIP_700_Bin0	700mSIPHEX1_0_scaffold_1091_c1	700mSIPHEX1	1881949	7719	700mSIPHEX1	11.016	235445848	85032.5	2.13414e+07	11.34	4.81641e-08	4.81641
		SIP_700_Bin0	700mSIPHEX1_0_scaffold_1106_c1	700mSIPHEX1	1881949	7565	700mSIPHEX1	10.1893	235445848	77082.1	2.13414e+07	11.34	4.81641e-08	4.81641
		SIP_700_Bin0	700mSIPHEX1_0_scaffold_1131_c1	700mSIPHEX1	1881949	7306	700mSIPHEX1	12.2362	235445848	89397.7	2.13414e+07	11.34	4.81641e-08	4.81641
		SIP_700_Bin0	700mSIPHEX1_0_scaffold_1133_c1	700mSIPHEX1	1881949	7305	700mSIPHEX1	9.16436	235445848	66945.6	2.13414e+07	11.34	4.81641e-08	4.81641
		SIP_700_Bin0	700mSIPHEX1_0_scaffold_1135_c1	700mSIPHEX1	1881949	7293	700mSIPHEX1	13.8048	235445848	100678	2.13414e+07	11.34	4.81641e-08	4.81641
		SIP_700_Bin0	700mSIPHEX1_0_scaffold_1138_c1	700mSIPHEX1	1881949	7269	700mSIPHEX1	12.4426	235445848	90445.3	2.13414e+07	11.34	4.81641e-08	4.81641
		SIP_700_Bin0	700mSIPHEX1_0_scaffold_982_c1	700mSIPHEX1	1881949	7262	700mSIPHEX1	12.6384	235445848	91780.1	2.13414e+07	11.34	4.81641e-08	4.81641
		SIP_700_Bin0	700mSIPHEX1_0_scaffold_1142_c1	700mSIPHEX1	1881949	7236	700mSIPHEX1	8.66342	235445848	62688.5	2.13414e+07	11.34	4.81641e-08	4.81641
		SIP_700_Bin0	700mSIPHEX1_0_scaffold_1151_c1	700mSIPHEX1	1881949	7183	700mSIPHEX1	13.1443	235445848	94415.5	2.13414e+07	11.34	4.81641e-08	4.81641
		SIP_700_Bin0	700mSIPHEX1_0_scaffold_1159_c1	700mSIPHEX1	1881949	7122	700mSIPHEX1	12.8038	235445848	91188.7	2.13414e+07	11.34	4.81641e-08	4.81641
		SIP_700_Bin0	700mSIPHEX1_0_scaffold_1169_c1	700mSIPHEX1	1881949	7059	700mSIPHEX1	15.2311	235445848	107516	2.13414e+07	11.34	4.81641e-08	4.81641
		SIP_700_Bin0	700mSIPHEX1_0_scaffold_1172_c1	700mSIPHEX1	1881949	7024	700mSIPHEX1	11.4775	235445848	80618	2.13414e+07	11.34	4.81641e-08	4.81641
		SIP_700_Bin0	700mSIPHEX1_0_scaffold_1178_c1	700mSIPHEX1	1881949	6982	700mSIPHEX1	12.8703	235445848	89860.4	2.13414e+07	11.34	4.81641e-08	4.81641
		SIP_700_Bin0	700mSIPHEX1_0_scaffold_1189_c1	700mSIPHEX1	1881949	6894	700mSIPHEX1	12.9646	235445848	89378	2.13414e+07	11.34	4.81641e-08	4.81641
		SIP_700_Bin0	700mSIPHEX1_0_scaffold_1196_c1	700mSIPHEX1	1881949	6854	700mSIPHEX1	10.7534	235445848	73703.8	2.13414e+07	11.34	4.81641e-08	4.81641
		SIP_700_Bin0	700mSIPHEX1_0_scaffold_1201_c1	700mSIPHEX1	1881949	6808	700mSIPHEX1	10.7804	235445848	73393	2.13414e+07	11.34	4.81641e-08	4.81641
		SIP_700_Bin0	700mSIPHEX1_0_scaffold_1202_c1	700mSIPHEX1	1881949	6800	700mSIPHEX1	8.91714	235445848	60636.6	2.13414e+07	11.34	4.81641e-08	4.81641
		SIP_700_Bin0	700mSIPHEX1_0_scaffold_1205_c1	700mSIPHEX1	1881949	6788	700mSIPHEX1	9.75128	235445848	66191.7	2.13414e+07	11.34	4.81641e-08	4.81641
		SIP_700_Bin0	700mSIPHEX1_0_scaffold_1206_c1	700mSIPHEX1	1881949	6777	700mSIPHEX1	13.3871	235445848	90724.4	2.13414e+07	11.34	4.81641e-08	4.81641
		SIP_700_Bin0	700mSIPHEX1_0_scaffold_1231_c1	700mSIPHEX1	1881949	6627	700mSIPHEX1	14.897	235445848	98722.4	2.13414e+07	11.34	4.81641e-08	4.81641
		SIP_700_Bin0	700mSIPHEX1_0_scaffold_1249_c1	700mSIPHEX1	1881949	6535	700mSIPHEX1	12.0334	235445848	78638.3	2.13414e+07	11.34	4.81641e-08	4.81641
		SIP_700_Bin0	700mSIPHEX1_0_scaffold_1250_c1	700mSIPHEX1	1881949	6530	700mSIPHEX1	9.86661	235445848	64429	2.13414e+07	11.34	4.81641e-08	4.81641
		SIP_700_Bin0	700mSIPHEX1_0_scaffold_1258_c1	700mSIPHEX1	1881949	6481	700mSIPHEX1	11.5612	235445848	74928.1	2.13414e+07	11.34	4.81641e-08	4.81641
		SIP_700_Bin0	700mSIPHEX1_0_scaffold_1262_c1	700mSIPHEX1	1881949	6457	700mSIPHEX1	11.5954	235445848	74871.5	2.13414e+07	11.34	4.81641e-08	4.81641
		SIP_700_Bin0	700mSIPHEX1_0_scaffold_1274_c1	700mSIPHEX1	1881949	6354	700mSIPHEX1	12.799	235445848	81324.8	2.13414e+07	11.34	4.81641e-08	4.81641
		SIP_700_Bin0	700mSIPHEX1_0_scaffold_1290_c1	700mSIPHEX1	1881949	6246	700mSIPHEX1	13.2218	235445848	82583.4	2.13414e+07	11.34	4.81641e-08	4.81641
		SIP_700_Bin0	700mSIPHEX1_0_scaffold_1292_c1	700mSIPHEX1	1881949	6228	700mSIPHEX1	11.3883	235445848	70926.3	2.13414e+07	11.34	4.81641e-08	4.81641
		SIP_700_Bin0	700mSIPHEX1_0_scaffold_1293_c1	700mSIPHEX1	1881949	6226	700mSIPHEX1	13.1381	235445848	81797.8	2.13414e+07	11.34	4.81641e-08	4.81641
		SIP_700_Bin0	700mSIPHEX1_0_scaffold_1299_c1	700mSIPHEX1	1881949	6203	700mSIPHEX1	10.7585	235445848	66735	2.13414e+07	11.34	4.81641e-08	4.81641
		SIP_700_Bin0	700mSIPHEX1_0_scaffold_1298_c1	700mSIPHEX1	1881949	6203	700mSIPHEX1	11.1345	235445848	69067.3	2.13414e+07	11.34	4.81641e-08	4.81641
		SIP_700_Bin0	700mSIPHEX1_0_scaffold_1301_c1	700mSIPHEX1	1881949	6184	700mSIPHEX1	11.501	235445848	71122.2	2.13414e+07	11.34	4.81641e-08	4.81641
		SIP_700_Bin0	700mSIPHEX1_0_scaffold_1305_c1	700mSIPHEX1	1881949	6164	700mSIPHEX1	11.6525	235445848	71826	2.13414e+07	11.34	4.81641e-08	4.81641
		SIP_700_Bin0	700mSIPHEX1_0_scaffold_1306_c1	700mSIPHEX1	1881949	6160	700mSIPHEX1	11.4148	235445848	70315.2	2.13414e+07	11.34	4.81641e-08	4.81641
		SIP_700_Bin0	700mSIPHEX1_0_scaffold_1308_c1	700mSIPHEX1	1881949	6134	700mSIPHEX1	14.07	235445848	86305.4	2.13414e+07	11.34	4.81641e-08	4.81641
		SIP_700_Bin0	700mSIPHEX1_0_scaffold_1320_c1	700mSIPHEX1	1881949	6103	700mSIPHEX1	14.8182	235445848	90435.5	2.13414e+07	11.34	4.81641e-08	4.81641
		SIP_700_Bin0	700mSIPHEX1_0_scaffold_1325_c1	700mSIPHEX1	1881949	6085	700mSIPHEX1	10.4374	235445848	63511.6	2.13414e+07	11.34	4.81641e-08	4.81641
		SIP_700_Bin0	700mSIPHEX1_0_scaffold_1349_c1	700mSIPHEX1	1881949	5994	700mSIPHEX1	8.66393	235445848	51931.6	2.13414e+07	11.34	4.81641e-08	4.81641
		SIP_700_Bin0	700mSIPHEX1_0_scaffold_1370_c1	700mSIPHEX1	1881949	5925	700mSIPHEX1	13.5337	235445848	80187.2	2.13414e+07	11.34	4.81641e-08	4.81641
		SIP_700_Bin0	700mSIPHEX1_0_scaffold_1372_c1	700mSIPHEX1	1881949	5907	700mSIPHEX1	11.1874	235445848	66084	2.13414e+07	11.34	4.81641e-08	4.81641
		SIP_700_Bin0	700mSIPHEX1_0_scaffold_1380_c1	700mSIPHEX1	1881949	5893	700mSIPHEX1	13.0824	235445848	77094.6	2.13414e+07	11.34	4.81641e-08	4.81641
		SIP_700_Bin0	700mSIPHEX1_0_scaffold_1381_c1	700mSIPHEX1	1881949	5891	700mSIPHEX1	9.1343	235445848	53810.2	2.13414e+07	11.34	4.81641e-08	4.81641
		SIP_700_Bin0	700mSIPHEX1_0_scaffold_1389_c1	700mSIPHEX1	1881949	5874	700mSIPHEX1	10.3819	235445848	60983.3	2.13414e+07	11.34	4.81641e-08	4.81641
		SIP_700_Bin0	700mSIPHEX1_0_scaffold_1399_c1	700mSIPHEX1	1881949	5860	700mSIPHEX1	10.0408	235445848	58839.1	2.13414e+07	11.34	4.81641e-08	4.81641
		SIP_700_Bin0	700mSIPHEX1_0_scaffold_1420_c1	700mSIPHEX1	1881949	5772	700mSIPHEX1	11.537	235445848	66591.6	2.13414e+07	11.34	4.81641e-08	4.81641
		SIP_700_Bin0	700mSIPHEX1_0_scaffold_1424_c1	700mSIPHEX1	1881949	5762	700mSIPHEX1	11.7739	235445848	67841.2	2.13414e+07	11.34	4.81641e-08	4.81641
		SIP_700_Bin0	700mSIPHEX1_0_scaffold_1428_c1	700mSIPHEX1	1881949	5751	700mSIPHEX1	11.7675	235445848	67674.9	2.13414e+07	11.34	4.81641e-08	4.81641
		SIP_700_Bin0	700mSIPHEX1_0_scaffold_1454_c1	700mSIPHEX1	1881949	5660	700mSIPHEX1	12.9882	235445848	73513.2	2.13414e+07	11.34	4.81641e-08	4.81641
		SIP_700_Bin0	700mSIPHEX1_0_scaffold_1458_c1	700mSIPHEX1	1881949	5656	700mSIPHEX1	13.2181	235445848	74761.6	2.13414e+07	11.34	4.81641e-08	4.81641
		SIP_700_Bin0	700mSIPHEX1_0_scaffold_1481_c1	700mSIPHEX1	1881949	5551	700mSIPHEX1	10.5562	235445848	58597.5	2.13414e+07	11.34	4.81641e-08	4.81641
		SIP_700_Bin0	700mSIPHEX1_0_scaffold_1484_c1	700mSIPHEX1	1881949	5545	700mSIPHEX1	12.894	235445848	71497.2	2.13414e+07	11.34	4.81641e-08	4.81641
		SIP_700_Bin0	700mSIPHEX1_0_scaffold_1244_c1	700mSIPHEX1	1881949	5543	700mSIPHEX1	9.99833	235445848	55420.7	2.13414e+07	11.34	4.81641e-08	4.81641
		SIP_700_Bin0	700mSIPHEX1_0_scaffold_1485_c1	700mSIPHEX1	1881949	5539	700mSIPHEX1	9.83633	235445848	54483.4	2.13414e+07	11.34	4.81641e-08	4.81641
		SIP_700_Bin0	700mSIPHEX1_0_scaffold_1487_c1	700mSIPHEX1	1881949	5523	700mSIPHEX1	10.5991	235445848	58538.8	2.13414e+07	11.34	4.81641e-08	4.81641
		SIP_700_Bin0	700mSIPHEX1_0_scaffold_1488_c1	700mSIPHEX1	1881949	5520	700mSIPHEX1	11.5084	235445848	63526.4	2.13414e+07	11.34	4.81641e-08	4.81641
		SIP_700_Bin0	700mSIPHEX1_0_scaffold_1489_c1	700mSIPHEX1	1881949	5519	700mSIPHEX1	12.8206	235445848	70756.9	2.13414e+07	11.34	4.81641e-08	4.81641
		SIP_700_Bin0	700mSIPHEX1_0_scaffold_1495_c1	700mSIPHEX1	1881949	5502	700mSIPHEX1	9.52074	235445848	52383.1	2.13414e+07	11.34	4.81641e-08	4.81641
		SIP_700_Bin0	700mSIPHEX1_0_scaffold_1496_c1	700mSIPHEX1	1881949	5499	700mSIPHEX1	9.75678	235445848	53652.5	2.13414e+07	11.34	4.81641e-08	4.81641
		SIP_700_Bin0	700mSIPHEX1_0_scaffold_1502_c1	700mSIPHEX1	1881949	5472	700mSIPHEX1	11.698	235445848	64011.5	2.13414e+07	11.34	4.81641e-08	4.81641
		SIP_700_Bin0	700mSIPHEX1_0_scaffold_1438_c2	700mSIPHEX1	1881949	5424	700mSIPHEX1	9.20231	235445848	49913.3	2.13414e+07	11.34	4.81641e-08	4.81641
		SIP_700_Bin0	700mSIPHEX1_0_scaffold_1511_c1	700mSIPHEX1	1881949	5420	700mSIPHEX1	8.88842	235445848	48175.2	2.13414e+07	11.34	4.81641e-08	4.81641
		SIP_700_Bin0	700mSIPHEX1_0_scaffold_1143_c2	700mSIPHEX1	1881949	5405	700mSIPHEX1	11.0407	235445848	59675	2.13414e+07	11.34	4.81641e-08	4.81641
		SIP_700_Bin0	700mSIPHEX1_0_scaffold_1518_c1	700mSIPHEX1	1881949	5388	700mSIPHEX1	11.311	235445848	60943.7	2.13414e+07	11.34	4.81641e-08	4.81641
		SIP_700_Bin0	700mSIPHEX1_0_scaffold_1530_c1	700mSIPHEX1	1881949	5361	700mSIPHEX1	8.635	235445848	46292.2	2.13414e+07	11.34	4.81641e-08	4.81641
		SIP_700_Bin0	700mSIPHEX1_0_scaffold_1538_c1	700mSIPHEX1	1881949	5345	700mSIPHEX1	10.6337	235445848	56837.1	2.13414e+07	11.34	4.81641e-08	4.81641
		SIP_700_Bin0	700mSIPHEX1_0_scaffold_1540_c1	700mSIPHEX1	1881949	5338	700mSIPHEX1	11.1781	235445848	59668.7	2.13414e+07	11.34	4.81641e-08	4.81641
		SIP_700_Bin0	700mSIPHEX1_0_scaffold_1543_c1	700mSIPHEX1	1881949	5330	700mSIPHEX1	11.9915	235445848	63914.7	2.13414e+07	11.34	4.81641e-08	4.81641
		SIP_700_Bin0	700mSIPHEX1_0_scaffold_1548_c1	700mSIPHEX1	1881949	5298	700mSIPHEX1	11.8421	235445848	62739.4	2.13414e+07	11.34	4.81641e-08	4.81641
		SIP_700_Bin0	700mSIPHEX1_0_scaffold_1569_c1	700mSIPHEX1	1881949	5242	700mSIPHEX1	11.8682	235445848	62213.1	2.13414e+07	11.34	4.81641e-08	4.81641
		SIP_700_Bin0	700mSIPHEX1_0_scaffold_1571_c1	700mSIPHEX1	1881949	5234	700mSIPHEX1	12.6998	235445848	66470.8	2.13414e+07	11.34	4.81641e-08	4.81641
		SIP_700_Bin0	700mSIPHEX1_0_scaffold_1577_c1	700mSIPHEX1	1881949	5212	700mSIPHEX1	13.6416	235445848	71100	2.13414e+07	11.34	4.81641e-08	4.81641
		SIP_700_Bin0	700mSIPHEX1_0_scaffold_1598_c1	700mSIPHEX1	1881949	5147	700mSIPHEX1	11.2912	235445848	58115.8	2.13414e+07	11.34	4.81641e-08	4.81641
		SIP_700_Bin0	700mSIPHEX1_0_scaffold_1601_c1	700mSIPHEX1	1881949	5140	700mSIPHEX1	14.4645	235445848	74347.5	2.13414e+07	11.34	4.81641e-08	4.81641
		SIP_700_Bin0	700mSIPHEX1_0_scaffold_1603_c1	700mSIPHEX1	1881949	5139	700mSIPHEX1	12.5155	235445848	64317.2	2.13414e+07	11.34	4.81641e-08	4.81641
		SIP_700_Bin0	700mSIPHEX1_0_scaffold_1602_c1	700mSIPHEX1	1881949	5139	700mSIPHEX1	11.1112	235445848	57100.5	2.13414e+07	11.34	4.81641e-08	4.81641
		SIP_700_Bin0	700mSIPHEX1_0_scaffold_1607_c1	700mSIPHEX1	1881949	5124	700mSIPHEX1	13.6305	235445848	69842.7	2.13414e+07	11.34	4.81641e-08	4.81641
		SIP_700_Bin0	700mSIPHEX1_0_scaffold_1606_c1	700mSIPHEX1	1881949	5124	700mSIPHEX1	9.73442	235445848	49879.2	2.13414e+07	11.34	4.81641e-08	4.81641
		SIP_700_Bin0	700mSIPHEX1_0_scaffold_1611_c1	700mSIPHEX1	1881949	5112	700mSIPHEX1	9.51229	235445848	48626.8	2.13414e+07	11.34	4.81641e-08	4.81641
		SIP_700_Bin0	700mSIPHEX1_0_scaffold_1622_c1	700mSIPHEX1	1881949	5099	700mSIPHEX1	12.9364	235445848	65962.7	2.13414e+07	11.34	4.81641e-08	4.81641
		SIP_700_Bin0	700mSIPHEX1_0_scaffold_1626_c1	700mSIPHEX1	1881949	5079	700mSIPHEX1	9.93974	235445848	50483.9	2.13414e+07	11.34	4.81641e-08	4.81641
		SIP_700_Bin0	700mSIPHEX1_0_scaffold_1628_c1	700mSIPHEX1	1881949	5077	700mSIPHEX1	10.7223	235445848	54437.1	2.13414e+07	11.34	4.81641e-08	4.81641
		SIP_700_Bin0	700mSIPHEX1_0_scaffold_1629_c1	700mSIPHEX1	1881949	5073	700mSIPHEX1	10.284	235445848	52170.7	2.13414e+07	11.34	4.81641e-08	4.81641
		SIP_700_Bin0	700mSIPHEX1_0_scaffold_1641_c1	700mSIPHEX1	1881949	5044	700mSIPHEX1	11.3032	235445848	57013.3	2.13414e+07	11.34	4.81641e-08	4.81641
		SIP_700_Bin0	700mSIPHEX1_0_scaffold_1652_c1	700mSIPHEX1	1881949	5015	700mSIPHEX1	11.5877	235445848	58112.3	2.13414e+07	11.34	4.81641e-08	4.81641
		SIP_700_Bin0	700mSIPHEX1_0_scaffold_1676_c1	700mSIPHEX1	1881949	4940	700mSIPHEX1	9.51608	235445848	47009.4	2.13414e+07	11.34	4.81641e-08	4.81641
		SIP_700_Bin0	700mSIPHEX1_0_scaffold_1677_c1	700mSIPHEX1	1881949	4936	700mSIPHEX1	12.1509	235445848	59976.8	2.13414e+07	11.34	4.81641e-08	4.81641
		SIP_700_Bin0	700mSIPHEX1_0_scaffold_1681_c1	700mSIPHEX1	1881949	4923	700mSIPHEX1	10.3685	235445848	51044.1	2.13414e+07	11.34	4.81641e-08	4.81641
		SIP_700_Bin0	700mSIPHEX1_0_scaffold_1685_c1	700mSIPHEX1	1881949	4912	700mSIPHEX1	10.4666	235445848	51411.9	2.13414e+07	11.34	4.81641e-08	4.81641
		SIP_700_Bin0	700mSIPHEX1_0_scaffold_1690_c1	700mSIPHEX1	1881949	4899	700mSIPHEX1	12.0272	235445848	58921.3	2.13414e+07	11.34	4.81641e-08	4.81641
		SIP_700_Bin0	700mSIPHEX1_0_scaffold_1694_c1	700mSIPHEX1	1881949	4890	700mSIPHEX1	11.0468	235445848	54018.9	2.13414e+07	11.34	4.81641e-08	4.81641
		SIP_700_Bin0	700mSIPHEX1_0_scaffold_1697_c1	700mSIPHEX1	1881949	4888	700mSIPHEX1	11.1188	235445848	54348.7	2.13414e+07	11.34	4.81641e-08	4.81641
		SIP_700_Bin0	700mSIPHEX1_0_scaffold_1707_c1	700mSIPHEX1	1881949	4866	700mSIPHEX1	10.6397	235445848	51772.8	2.13414e+07	11.34	4.81641e-08	4.81641
		SIP_700_Bin0	700mSIPHEX1_0_scaffold_1709_c1	700mSIPHEX1	1881949	4865	700mSIPHEX1	12.4414	235445848	60527.4	2.13414e+07	11.34	4.81641e-08	4.81641
		SIP_700_Bin0	700mSIPHEX1_0_scaffold_1711_c1	700mSIPHEX1	1881949	4864	700mSIPHEX1	13.0218	235445848	63338	2.13414e+07	11.34	4.81641e-08	4.81641
		SIP_700_Bin0	700mSIPHEX1_0_scaffold_1710_c1	700mSIPHEX1	1881949	4864	700mSIPHEX1	6.48345	235445848	31535.5	2.13414e+07	11.34	4.81641e-08	4.81641
		SIP_700_Bin0	700mSIPHEX1_0_scaffold_1717_c1	700mSIPHEX1	1881949	4848	700mSIPHEX1	10.7869	235445848	52294.9	2.13414e+07	11.34	4.81641e-08	4.81641
		SIP_700_Bin0	700mSIPHEX1_0_scaffold_1721_c1	700mSIPHEX1	1881949	4844	700mSIPHEX1	13.4759	235445848	65277.3	2.13414e+07	11.34	4.81641e-08	4.81641
		SIP_700_Bin0	700mSIPHEX1_0_scaffold_1725_c1	700mSIPHEX1	1881949	4837	700mSIPHEX1	12.2084	235445848	59052	2.13414e+07	11.34	4.81641e-08	4.81641
		SIP_700_Bin0	700mSIPHEX1_0_scaffold_1731_c1	700mSIPHEX1	1881949	4826	700mSIPHEX1	14.2994	235445848	69008.9	2.13414e+07	11.34	4.81641e-08	4.81641
		SIP_700_Bin0	700mSIPHEX1_0_scaffold_1742_c1	700mSIPHEX1	1881949	4805	700mSIPHEX1	11.9542	235445848	57439.9	2.13414e+07	11.34	4.81641e-08	4.81641
		SIP_700_Bin0	700mSIPHEX1_0_scaffold_1744_c1	700mSIPHEX1	1881949	4799	700mSIPHEX1	13.9682	235445848	67033.4	2.13414e+07	11.34	4.81641e-08	4.81641
		SIP_700_Bin0	700mSIPHEX1_0_scaffold_1749_c1	700mSIPHEX1	1881949	4790	700mSIPHEX1	10.5688	235445848	50624.6	2.13414e+07	11.34	4.81641e-08	4.81641
		SIP_700_Bin0	700mSIPHEX1_0_scaffold_1762_c1	700mSIPHEX1	1881949	4759	700mSIPHEX1	10.8811	235445848	51783.2	2.13414e+07	11.34	4.81641e-08	4.81641
		SIP_700_Bin0	700mSIPHEX1_0_scaffold_1772_c1	700mSIPHEX1	1881949	4734	700mSIPHEX1	12.1348	235445848	57446.1	2.13414e+07	11.34	4.81641e-08	4.81641
		SIP_700_Bin0	700mSIPHEX1_0_scaffold_1773_c1	700mSIPHEX1	1881949	4733	700mSIPHEX1	9.36134	235445848	44307.2	2.13414e+07	11.34	4.81641e-08	4.81641
		SIP_700_Bin0	700mSIPHEX1_0_scaffold_1786_c1	700mSIPHEX1	1881949	4696	700mSIPHEX1	10.6368	235445848	49950.4	2.13414e+07	11.34	4.81641e-08	4.81641
		SIP_700_Bin0	700mSIPHEX1_0_scaffold_1795_c1	700mSIPHEX1	1881949	4678	700mSIPHEX1	10.4848	235445848	49047.9	2.13414e+07	11.34	4.81641e-08	4.81641
		SIP_700_Bin0	700mSIPHEX1_0_scaffold_1799_c1	700mSIPHEX1	1881949	4669	700mSIPHEX1	11.8267	235445848	55218.9	2.13414e+07	11.34	4.81641e-08	4.81641
		SIP_700_Bin0	700mSIPHEX1_0_scaffold_1801_c1	700mSIPHEX1	1881949	4662	700mSIPHEX1	9.51529	235445848	44360.3	2.13414e+07	11.34	4.81641e-08	4.81641
		SIP_700_Bin0	700mSIPHEX1_0_scaffold_1804_c1	700mSIPHEX1	1881949	4655	700mSIPHEX1	11.4719	235445848	53401.7	2.13414e+07	11.34	4.81641e-08	4.81641
		SIP_700_Bin0	700mSIPHEX1_0_scaffold_1806_c1	700mSIPHEX1	1881949	4651	700mSIPHEX1	11.4255	235445848	53140	2.13414e+07	11.34	4.81641e-08	4.81641
		SIP_700_Bin0	700mSIPHEX1_0_scaffold_1808_c1	700mSIPHEX1	1881949	4646	700mSIPHEX1	11.9117	235445848	55341.8	2.13414e+07	11.34	4.81641e-08	4.81641
		SIP_700_Bin0	700mSIPHEX1_0_scaffold_1812_c1	700mSIPHEX1	1881949	4628	700mSIPHEX1	9.61791	235445848	44511.7	2.13414e+07	11.34	4.81641e-08	4.81641
		SIP_700_Bin0	700mSIPHEX1_0_scaffold_1816_c1	700mSIPHEX1	1881949	4621	700mSIPHEX1	10.7074	235445848	49478.9	2.13414e+07	11.34	4.81641e-08	4.81641
		SIP_700_Bin0	700mSIPHEX1_0_scaffold_1829_c1	700mSIPHEX1	1881949	4600	700mSIPHEX1	12.1526	235445848	55902	2.13414e+07	11.34	4.81641e-08	4.81641
		SIP_700_Bin0	700mSIPHEX1_0_scaffold_1834_c1	700mSIPHEX1	1881949	4587	700mSIPHEX1	9.33942	235445848	42839.9	2.13414e+07	11.34	4.81641e-08	4.81641
		SIP_700_Bin0	700mSIPHEX1_0_scaffold_1843_c1	700mSIPHEX1	1881949	4560	700mSIPHEX1	7.37914	235445848	33648.9	2.13414e+07	11.34	4.81641e-08	4.81641
		SIP_700_Bin0	700mSIPHEX1_0_scaffold_1845_c1	700mSIPHEX1	1881949	4553	700mSIPHEX1	13.3806	235445848	60921.9	2.13414e+07	11.34	4.81641e-08	4.81641
		SIP_700_Bin0	700mSIPHEX1_0_scaffold_1857_c1	700mSIPHEX1	1881949	4519	700mSIPHEX1	9.96544	235445848	45033.8	2.13414e+07	11.34	4.81641e-08	4.81641
		SIP_700_Bin0	700mSIPHEX1_0_scaffold_1858_c1	700mSIPHEX1	1881949	4517	700mSIPHEX1	11.1995	235445848	50588.1	2.13414e+07	11.34	4.81641e-08	4.81641
		SIP_700_Bin0	700mSIPHEX1_0_scaffold_1866_c1	700mSIPHEX1	1881949	4505	700mSIPHEX1	11.0473	235445848	49768.1	2.13414e+07	11.34	4.81641e-08	4.81641
		SIP_700_Bin0	700mSIPHEX1_0_scaffold_1868_c1	700mSIPHEX1	1881949	4503	700mSIPHEX1	13.2568	235445848	59695.4	2.13414e+07	11.34	4.81641e-08	4.81641
		SIP_700_Bin0	700mSIPHEX1_0_scaffold_1874_c1	700mSIPHEX1	1881949	4487	700mSIPHEX1	11.4535	235445848	51391.9	2.13414e+07	11.34	4.81641e-08	4.81641
		SIP_700_Bin0	700mSIPHEX1_0_scaffold_1876_c1	700mSIPHEX1	1881949	4485	700mSIPHEX1	12.0397	235445848	53998.1	2.13414e+07	11.34	4.81641e-08	4.81641
		SIP_700_Bin0	700mSIPHEX1_0_scaffold_1881_c1	700mSIPHEX1	1881949	4471	700mSIPHEX1	11.5922	235445848	51828.7	2.13414e+07	11.34	4.81641e-08	4.81641
		SIP_700_Bin0	700mSIPHEX1_0_scaffold_1887_c1	700mSIPHEX1	1881949	4452	700mSIPHEX1	12.2771	235445848	54657.6	2.13414e+07	11.34	4.81641e-08	4.81641
		SIP_700_Bin0	700mSIPHEX1_0_scaffold_1889_c1	700mSIPHEX1	1881949	4450	700mSIPHEX1	10.4107	235445848	46327.6	2.13414e+07	11.34	4.81641e-08	4.81641
		SIP_700_Bin0	700mSIPHEX1_0_scaffold_1892_c1	700mSIPHEX1	1881949	4448	700mSIPHEX1	13.402	235445848	59612.1	2.13414e+07	11.34	4.81641e-08	4.81641
		SIP_700_Bin0	700mSIPHEX1_0_scaffold_1897_c1	700mSIPHEX1	1881949	4438	700mSIPHEX1	12.7971	235445848	56793.5	2.13414e+07	11.34	4.81641e-08	4.81641
		SIP_700_Bin0	700mSIPHEX1_0_scaffold_1903_c1	700mSIPHEX1	1881949	4428	700mSIPHEX1	11.4299	235445848	50611.6	2.13414e+07	11.34	4.81641e-08	4.81641
		SIP_700_Bin0	700mSIPHEX1_0_scaffold_1908_c1	700mSIPHEX1	1881949	4424	700mSIPHEX1	9.98853	235445848	44189.3	2.13414e+07	11.34	4.81641e-08	4.81641
		SIP_700_Bin0	700mSIPHEX1_0_scaffold_1912_c1	700mSIPHEX1	1881949	4422	700mSIPHEX1	10.4389	235445848	46160.8	2.13414e+07	11.34	4.81641e-08	4.81641
		SIP_700_Bin0	700mSIPHEX1_0_scaffold_1916_c1	700mSIPHEX1	1881949	4411	700mSIPHEX1	11.3574	235445848	50097.5	2.13414e+07	11.34	4.81641e-08	4.81641
		SIP_700_Bin0	700mSIPHEX1_0_scaffold_1920_c1	700mSIPHEX1	1881949	4401	700mSIPHEX1	10.151	235445848	44674.6	2.13414e+07	11.34	4.81641e-08	4.81641
		SIP_700_Bin0	700mSIPHEX1_0_scaffold_1926_c1	700mSIPHEX1	1881949	4393	700mSIPHEX1	11.63	235445848	51090.6	2.13414e+07	11.34	4.81641e-08	4.81641
		SIP_700_Bin0	700mSIPHEX1_0_scaffold_1927_c1	700mSIPHEX1	1881949	4391	700mSIPHEX1	9.42631	235445848	41390.9	2.13414e+07	11.34	4.81641e-08	4.81641
		SIP_700_Bin0	700mSIPHEX1_0_scaffold_1931_c1	700mSIPHEX1	1881949	4381	700mSIPHEX1	10.8116	235445848	47365.6	2.13414e+07	11.34	4.81641e-08	4.81641
		SIP_700_Bin0	700mSIPHEX1_0_scaffold_1938_c1	700mSIPHEX1	1881949	4367	700mSIPHEX1	10.9976	235445848	48026.5	2.13414e+07	11.34	4.81641e-08	4.81641
		SIP_700_Bin0	700mSIPHEX1_0_scaffold_1942_c1	700mSIPHEX1	1881949	4359	700mSIPHEX1	12.1782	235445848	53084.8	2.13414e+07	11.34	4.81641e-08	4.81641
		SIP_700_Bin0	700mSIPHEX1_0_scaffold_1945_c1	700mSIPHEX1	1881949	4352	700mSIPHEX1	9.75155	235445848	42438.7	2.13414e+07	11.34	4.81641e-08	4.81641
		SIP_700_Bin0	700mSIPHEX1_0_scaffold_1949_c1	700mSIPHEX1	1881949	4345	700mSIPHEX1	11.5709	235445848	50275.6	2.13414e+07	11.34	4.81641e-08	4.81641
		SIP_700_Bin0	700mSIPHEX1_0_scaffold_1645_c2	700mSIPHEX1	1881949	4311	700mSIPHEX1	13.6044	235445848	58648.6	2.13414e+07	11.34	4.81641e-08	4.81641
		SIP_700_Bin0	700mSIPHEX1_0_scaffold_1973_c1	700mSIPHEX1	1881949	4303	700mSIPHEX1	9.86901	235445848	42466.4	2.13414e+07	11.34	4.81641e-08	4.81641
		SIP_700_Bin0	700mSIPHEX1_0_scaffold_1984_c1	700mSIPHEX1	1881949	4284	700mSIPHEX1	12.1543	235445848	52069	2.13414e+07	11.34	4.81641e-08	4.81641
		SIP_700_Bin0	700mSIPHEX1_0_scaffold_2000_c1	700mSIPHEX1	1881949	4261	700mSIPHEX1	10.2564	235445848	43702.5	2.13414e+07	11.34	4.81641e-08	4.81641
		SIP_700_Bin0	700mSIPHEX1_0_scaffold_1757_c2	700mSIPHEX1	1881949	4259	700mSIPHEX1	7.21051	235445848	30709.6	2.13414e+07	11.34	4.81641e-08	4.81641
		SIP_700_Bin0	700mSIPHEX1_0_scaffold_2003_c1	700mSIPHEX1	1881949	4252	700mSIPHEX1	14.1078	235445848	59986.4	2.13414e+07	11.34	4.81641e-08	4.81641
		SIP_700_Bin0	700mSIPHEX1_0_scaffold_2008_c1	700mSIPHEX1	1881949	4244	700mSIPHEX1	11.5134	235445848	48862.9	2.13414e+07	11.34	4.81641e-08	4.81641
		SIP_700_Bin0	700mSIPHEX1_0_scaffold_2007_c1	700mSIPHEX1	1881949	4244	700mSIPHEX1	10.789	235445848	45788.5	2.13414e+07	11.34	4.81641e-08	4.81641
		SIP_700_Bin0	700mSIPHEX1_0_scaffold_2020_c1	700mSIPHEX1	1881949	4229	700mSIPHEX1	12.0932	235445848	51142.1	2.13414e+07	11.34	4.81641e-08	4.81641
		SIP_700_Bin0	700mSIPHEX1_0_scaffold_2022_c1	700mSIPHEX1	1881949	4223	700mSIPHEX1	11.5446	235445848	48752.8	2.13414e+07	11.34	4.81641e-08	4.81641
		SIP_700_Bin0	700mSIPHEX1_0_scaffold_2027_c1	700mSIPHEX1	1881949	4213	700mSIPHEX1	13.6232	235445848	57394.5	2.13414e+07	11.34	4.81641e-08	4.81641
		SIP_700_Bin0	700mSIPHEX1_0_scaffold_2028_c1	700mSIPHEX1	1881949	4210	700mSIPHEX1	10.4562	235445848	44020.6	2.13414e+07	11.34	4.81641e-08	4.81641
		SIP_700_Bin0	700mSIPHEX1_0_scaffold_2034_c1	700mSIPHEX1	1881949	4196	700mSIPHEX1	11.4172	235445848	47906.6	2.13414e+07	11.34	4.81641e-08	4.81641
		SIP_700_Bin0	700mSIPHEX1_0_scaffold_2038_c1	700mSIPHEX1	1881949	4184	700mSIPHEX1	9.86019	235445848	41255	2.13414e+07	11.34	4.81641e-08	4.81641
		SIP_700_Bin0	700mSIPHEX1_0_scaffold_2041_c1	700mSIPHEX1	1881949	4181	700mSIPHEX1	12.5711	235445848	52559.8	2.13414e+07	11.34	4.81641e-08	4.81641
		SIP_700_Bin0	700mSIPHEX1_0_scaffold_2042_c1	700mSIPHEX1	1881949	4180	700mSIPHEX1	10.9578	235445848	45803.6	2.13414e+07	11.34	4.81641e-08	4.81641
		SIP_700_Bin0	700mSIPHEX1_0_scaffold_2044_c1	700mSIPHEX1	1881949	4178	700mSIPHEX1	11.496	235445848	48030.3	2.13414e+07	11.34	4.81641e-08	4.81641
		SIP_700_Bin0	700mSIPHEX1_0_scaffold_2043_c1	700mSIPHEX1	1881949	4178	700mSIPHEX1	10.7736	235445848	45012.1	2.13414e+07	11.34	4.81641e-08	4.81641
		SIP_700_Bin0	700mSIPHEX1_0_scaffold_2045_c1	700mSIPHEX1	1881949	4177	700mSIPHEX1	13.587	235445848	56752.9	2.13414e+07	11.34	4.81641e-08	4.81641
		SIP_700_Bin0	700mSIPHEX1_0_scaffold_2047_c1	700mSIPHEX1	1881949	4176	700mSIPHEX1	13.1615	235445848	54962.4	2.13414e+07	11.34	4.81641e-08	4.81641
		SIP_700_Bin0	700mSIPHEX1_0_scaffold_2054_c1	700mSIPHEX1	1881949	4163	700mSIPHEX1	11.8747	235445848	49434.4	2.13414e+07	11.34	4.81641e-08	4.81641
		SIP_700_Bin0	700mSIPHEX1_0_scaffold_2056_c1	700mSIPHEX1	1881949	4156	700mSIPHEX1	13.0132	235445848	54082.9	2.13414e+07	11.34	4.81641e-08	4.81641
		SIP_700_Bin0	700mSIPHEX1_0_scaffold_2065_c1	700mSIPHEX1	1881949	4143	700mSIPHEX1	8.61608	235445848	35696.4	2.13414e+07	11.34	4.81641e-08	4.81641
		SIP_700_Bin0	700mSIPHEX1_0_scaffold_2067_c1	700mSIPHEX1	1881949	4139	700mSIPHEX1	9.65631	235445848	39967.5	2.13414e+07	11.34	4.81641e-08	4.81641
		SIP_700_Bin0	700mSIPHEX1_0_scaffold_2075_c1	700mSIPHEX1	1881949	4128	700mSIPHEX1	8.56611	235445848	35360.9	2.13414e+07	11.34	4.81641e-08	4.81641
		SIP_700_Bin0	700mSIPHEX1_0_scaffold_2078_c1	700mSIPHEX1	1881949	4121	700mSIPHEX1	9.58524	235445848	39500.8	2.13414e+07	11.34	4.81641e-08	4.81641
		SIP_700_Bin0	700mSIPHEX1_0_scaffold_2090_c1	700mSIPHEX1	1881949	4097	700mSIPHEX1	8.97517	235445848	36771.3	2.13414e+07	11.34	4.81641e-08	4.81641
		SIP_700_Bin0	700mSIPHEX1_0_scaffold_1913_c2	700mSIPHEX1	1881949	4085	700mSIPHEX1	10.786	235445848	44060.8	2.13414e+07	11.34	4.81641e-08	4.81641
		SIP_700_Bin0	700mSIPHEX1_0_scaffold_2098_c1	700mSIPHEX1	1881949	4080	700mSIPHEX1	8.0972	235445848	33036.6	2.13414e+07	11.34	4.81641e-08	4.81641
		SIP_700_Bin0	700mSIPHEX1_0_scaffold_2103_c1	700mSIPHEX1	1881949	4073	700mSIPHEX1	17.3477	235445848	70657.2	2.13414e+07	11.34	4.81641e-08	4.81641
		SIP_700_Bin0	700mSIPHEX1_0_scaffold_2104_c1	700mSIPHEX1	1881949	4072	700mSIPHEX1	10.126	235445848	41233.1	2.13414e+07	11.34	4.81641e-08	4.81641
		SIP_700_Bin0	700mSIPHEX1_0_scaffold_2110_c1	700mSIPHEX1	1881949	4060	700mSIPHEX1	9.63785	235445848	39129.7	2.13414e+07	11.34	4.81641e-08	4.81641
		SIP_700_Bin0	700mSIPHEX1_0_scaffold_2111_c1	700mSIPHEX1	1881949	4058	700mSIPHEX1	10.458	235445848	42438.6	2.13414e+07	11.34	4.81641e-08	4.81641
		SIP_700_Bin0	700mSIPHEX1_0_scaffold_2113_c1	700mSIPHEX1	1881949	4057	700mSIPHEX1	8.14052	235445848	33026.1	2.13414e+07	11.34	4.81641e-08	4.81641
		SIP_700_Bin0	700mSIPHEX1_0_scaffold_2118_c1	700mSIPHEX1	1881949	4053	700mSIPHEX1	8.84115	235445848	35833.2	2.13414e+07	11.34	4.81641e-08	4.81641
		SIP_700_Bin0	700mSIPHEX1_0_scaffold_2125_c1	700mSIPHEX1	1881949	4036	700mSIPHEX1	10.1889	235445848	41122.4	2.13414e+07	11.34	4.81641e-08	4.81641
		SIP_700_Bin0	700mSIPHEX1_0_scaffold_2132_c1	700mSIPHEX1	1881949	4032	700mSIPHEX1	14.271	235445848	57540.7	2.13414e+07	11.34	4.81641e-08	4.81641
		SIP_700_Bin0	700mSIPHEX1_0_scaffold_2131_c1	700mSIPHEX1	1881949	4032	700mSIPHEX1	9.25708	235445848	37324.5	2.13414e+07	11.34	4.81641e-08	4.81641
		SIP_700_Bin0	700mSIPHEX1_0_scaffold_2130_c1	700mSIPHEX1	1881949	4032	700mSIPHEX1	10.7043	235445848	43159.7	2.13414e+07	11.34	4.81641e-08	4.81641
		SIP_700_Bin0	700mSIPHEX1_0_scaffold_2134_c1	700mSIPHEX1	1881949	4031	700mSIPHEX1	9.81886	235445848	39579.8	2.13414e+07	11.34	4.81641e-08	4.81641
		SIP_700_Bin0	700mSIPHEX1_0_scaffold_2138_c1	700mSIPHEX1	1881949	4027	700mSIPHEX1	12.8971	235445848	51936.6	2.13414e+07	11.34	4.81641e-08	4.81641
		SIP_700_Bin0	700mSIPHEX1_0_scaffold_2153_c1	700mSIPHEX1	1881949	3997	700mSIPHEX1	9.9176	235445848	39640.6	2.13414e+07	11.34	4.81641e-08	4.81641
		SIP_700_Bin0	700mSIPHEX1_0_scaffold_2159_c1	700mSIPHEX1	1881949	3991	700mSIPHEX1	9.3861	235445848	37459.9	2.13414e+07	11.34	4.81641e-08	4.81641
		SIP_700_Bin0	700mSIPHEX1_0_scaffold_2164_c1	700mSIPHEX1	1881949	3979	700mSIPHEX1	11.9446	235445848	47527.6	2.13414e+07	11.34	4.81641e-08	4.81641
		SIP_700_Bin0	700mSIPHEX1_0_scaffold_1883_c1	700mSIPHEX1	1881949	3971	700mSIPHEX1	9.89662	235445848	39299.5	2.13414e+07	11.34	4.81641e-08	4.81641
		SIP_700_Bin0	700mSIPHEX1_0_scaffold_1800_c2	700mSIPHEX1	1881949	3942	700mSIPHEX1	10.1134	235445848	39867	2.13414e+07	11.34	4.81641e-08	4.81641
		SIP_700_Bin0	700mSIPHEX1_0_scaffold_2192_c1	700mSIPHEX1	1881949	3935	700mSIPHEX1	11.8021	235445848	46441.3	2.13414e+07	11.34	4.81641e-08	4.81641
		SIP_700_Bin0	700mSIPHEX1_0_scaffold_2193_c1	700mSIPHEX1	1881949	3934	700mSIPHEX1	8.85544	235445848	34837.3	2.13414e+07	11.34	4.81641e-08	4.81641
		SIP_700_Bin0	700mSIPHEX1_0_scaffold_2195_c1	700mSIPHEX1	1881949	3931	700mSIPHEX1	8.93943	235445848	35140.9	2.13414e+07	11.34	4.81641e-08	4.81641
		SIP_700_Bin0	700mSIPHEX1_0_scaffold_2202_c1	700mSIPHEX1	1881949	3915	700mSIPHEX1	11.6943	235445848	45783.2	2.13414e+07	11.34	4.81641e-08	4.81641
		SIP_700_Bin0	700mSIPHEX1_0_scaffold_2209_c1	700mSIPHEX1	1881949	3904	700mSIPHEX1	8.60176	235445848	33581.3	2.13414e+07	11.34	4.81641e-08	4.81641
		SIP_700_Bin0	700mSIPHEX1_0_scaffold_2218_c1	700mSIPHEX1	1881949	3889	700mSIPHEX1	10.5253	235445848	40932.9	2.13414e+07	11.34	4.81641e-08	4.81641
		SIP_700_Bin0	700mSIPHEX1_0_scaffold_2241_c1	700mSIPHEX1	1881949	3858	700mSIPHEX1	10.8492	235445848	41856.2	2.13414e+07	11.34	4.81641e-08	4.81641
		SIP_700_Bin0	700mSIPHEX1_0_scaffold_2244_c1	700mSIPHEX1	1881949	3857	700mSIPHEX1	12.3763	235445848	47735.4	2.13414e+07	11.34	4.81641e-08	4.81641
		SIP_700_Bin0	700mSIPHEX1_0_scaffold_2250_c1	700mSIPHEX1	1881949	3849	700mSIPHEX1	11.3209	235445848	43574.1	2.13414e+07	11.34	4.81641e-08	4.81641
		SIP_700_Bin0	700mSIPHEX1_0_scaffold_2249_c1	700mSIPHEX1	1881949	3849	700mSIPHEX1	7.13301	235445848	27455	2.13414e+07	11.34	4.81641e-08	4.81641
		SIP_700_Bin0	700mSIPHEX1_0_scaffold_2252_c1	700mSIPHEX1	1881949	3847	700mSIPHEX1	14.036	235445848	53996.5	2.13414e+07	11.34	4.81641e-08	4.81641
		SIP_700_Bin0	700mSIPHEX1_0_scaffold_2260_c1	700mSIPHEX1	1881949	3837	700mSIPHEX1	10.46	235445848	40135	2.13414e+07	11.34	4.81641e-08	4.81641
		SIP_700_Bin0	700mSIPHEX1_0_scaffold_2265_c1	700mSIPHEX1	1881949	3829	700mSIPHEX1	11.4884	235445848	43989.1	2.13414e+07	11.34	4.81641e-08	4.81641
		SIP_700_Bin0	700mSIPHEX1_0_scaffold_2268_c1	700mSIPHEX1	1881949	3824	700mSIPHEX1	10.2866	235445848	39336	2.13414e+07	11.34	4.81641e-08	4.81641
		SIP_700_Bin0	700mSIPHEX1_0_scaffold_2274_c1	700mSIPHEX1	1881949	3819	700mSIPHEX1	10.3279	235445848	39442.3	2.13414e+07	11.34	4.81641e-08	4.81641
		SIP_700_Bin0	700mSIPHEX1_0_scaffold_1643_c2	700mSIPHEX1	1881949	3817	700mSIPHEX1	11.949	235445848	45609.3	2.13414e+07	11.34	4.81641e-08	4.81641
		SIP_700_Bin0	700mSIPHEX1_0_scaffold_2277_c1	700mSIPHEX1	1881949	3816	700mSIPHEX1	11.1427	235445848	42520.5	2.13414e+07	11.34	4.81641e-08	4.81641
		SIP_700_Bin0	700mSIPHEX1_0_scaffold_2279_c1	700mSIPHEX1	1881949	3813	700mSIPHEX1	11.4409	235445848	43624.2	2.13414e+07	11.34	4.81641e-08	4.81641
		SIP_700_Bin0	700mSIPHEX1_0_scaffold_2282_c1	700mSIPHEX1	1881949	3808	700mSIPHEX1	12.5686	235445848	47861.2	2.13414e+07	11.34	4.81641e-08	4.81641
		SIP_700_Bin0	700mSIPHEX1_0_scaffold_2285_c1	700mSIPHEX1	1881949	3803	700mSIPHEX1	12.3594	235445848	47002.8	2.13414e+07	11.34	4.81641e-08	4.81641
		SIP_700_Bin0	700mSIPHEX1_0_scaffold_2287_c1	700mSIPHEX1	1881949	3799	700mSIPHEX1	5.8627	235445848	22272.4	2.13414e+07	11.34	4.81641e-08	4.81641
		SIP_700_Bin0	700mSIPHEX1_0_scaffold_2294_c1	700mSIPHEX1	1881949	3788	700mSIPHEX1	10.8719	235445848	41182.8	2.13414e+07	11.34	4.81641e-08	4.81641
		SIP_700_Bin0	700mSIPHEX1_0_scaffold_2305_c1	700mSIPHEX1	1881949	3772	700mSIPHEX1	12.6991	235445848	47901	2.13414e+07	11.34	4.81641e-08	4.81641
		SIP_700_Bin0	700mSIPHEX1_0_scaffold_2310_c1	700mSIPHEX1	1881949	3767	700mSIPHEX1	14.6793	235445848	55296.9	2.13414e+07	11.34	4.81641e-08	4.81641
		SIP_700_Bin0	700mSIPHEX1_0_scaffold_2311_c1	700mSIPHEX1	1881949	3763	700mSIPHEX1	8.23582	235445848	30991.4	2.13414e+07	11.34	4.81641e-08	4.81641
		SIP_700_Bin0	700mSIPHEX1_0_scaffold_2313_c1	700mSIPHEX1	1881949	3762	700mSIPHEX1	10.5975	235445848	39867.8	2.13414e+07	11.34	4.81641e-08	4.81641
		SIP_700_Bin0	700mSIPHEX1_0_scaffold_2318_c1	700mSIPHEX1	1881949	3751	700mSIPHEX1	12.175	235445848	45668.4	2.13414e+07	11.34	4.81641e-08	4.81641
		SIP_700_Bin0	700mSIPHEX1_0_scaffold_2324_c1	700mSIPHEX1	1881949	3746	700mSIPHEX1	10.2383	235445848	38352.7	2.13414e+07	11.34	4.81641e-08	4.81641
		SIP_700_Bin0	700mSIPHEX1_0_scaffold_2325_c1	700mSIPHEX1	1881949	3745	700mSIPHEX1	10.3878	235445848	38902.3	2.13414e+07	11.34	4.81641e-08	4.81641
		SIP_700_Bin0	700mSIPHEX1_0_scaffold_2340_c1	700mSIPHEX1	1881949	3716	700mSIPHEX1	12.4285	235445848	46184.3	2.13414e+07	11.34	4.81641e-08	4.81641
		SIP_700_Bin0	700mSIPHEX1_0_scaffold_2341_c1	700mSIPHEX1	1881949	3714	700mSIPHEX1	12.0715	235445848	44833.6	2.13414e+07	11.34	4.81641e-08	4.81641
		SIP_700_Bin0	700mSIPHEX1_0_scaffold_2347_c1	700mSIPHEX1	1881949	3711	700mSIPHEX1	10.7857	235445848	40025.7	2.13414e+07	11.34	4.81641e-08	4.81641
		SIP_700_Bin0	700mSIPHEX1_0_scaffold_2351_c1	700mSIPHEX1	1881949	3702	700mSIPHEX1	9.69398	235445848	35887.1	2.13414e+07	11.34	4.81641e-08	4.81641
		SIP_700_Bin0	700mSIPHEX1_0_scaffold_2360_c1	700mSIPHEX1	1881949	3681	700mSIPHEX1	8.67771	235445848	31942.7	2.13414e+07	11.34	4.81641e-08	4.81641
		SIP_700_Bin0	700mSIPHEX1_0_scaffold_2368_c1	700mSIPHEX1	1881949	3669	700mSIPHEX1	10.1259	235445848	37151.9	2.13414e+07	11.34	4.81641e-08	4.81641
		SIP_700_Bin0	700mSIPHEX1_0_scaffold_2367_c1	700mSIPHEX1	1881949	3669	700mSIPHEX1	11.6689	235445848	42813.2	2.13414e+07	11.34	4.81641e-08	4.81641
		SIP_700_Bin0	700mSIPHEX1_0_scaffold_2371_c1	700mSIPHEX1	1881949	3667	700mSIPHEX1	9.27779	235445848	34021.7	2.13414e+07	11.34	4.81641e-08	4.81641
		SIP_700_Bin0	700mSIPHEX1_0_scaffold_1975_c2	700mSIPHEX1	1881949	3661	700mSIPHEX1	13.6494	235445848	49970.5	2.13414e+07	11.34	4.81641e-08	4.81641
		SIP_700_Bin0	700mSIPHEX1_0_scaffold_2384_c1	700mSIPHEX1	1881949	3651	700mSIPHEX1	10.7952	235445848	39413.3	2.13414e+07	11.34	4.81641e-08	4.81641
		SIP_700_Bin0	700mSIPHEX1_0_scaffold_2383_c1	700mSIPHEX1	1881949	3651	700mSIPHEX1	8.99543	235445848	32842.3	2.13414e+07	11.34	4.81641e-08	4.81641
		SIP_700_Bin0	700mSIPHEX1_0_scaffold_2386_c1	700mSIPHEX1	1881949	3646	700mSIPHEX1	11.6256	235445848	42386.9	2.13414e+07	11.34	4.81641e-08	4.81641
		SIP_700_Bin0	700mSIPHEX1_0_scaffold_2392_c1	700mSIPHEX1	1881949	3635	700mSIPHEX1	11.8304	235445848	43003.5	2.13414e+07	11.34	4.81641e-08	4.81641
		SIP_700_Bin0	700mSIPHEX1_0_scaffold_2399_c1	700mSIPHEX1	1881949	3629	700mSIPHEX1	9.06582	235445848	32899.9	2.13414e+07	11.34	4.81641e-08	4.81641
		SIP_700_Bin0	700mSIPHEX1_0_scaffold_2403_c1	700mSIPHEX1	1881949	3624	700mSIPHEX1	12.3941	235445848	44916.2	2.13414e+07	11.34	4.81641e-08	4.81641
		SIP_700_Bin0	700mSIPHEX1_0_scaffold_2407_c1	700mSIPHEX1	1881949	3619	700mSIPHEX1	12.0458	235445848	43593.8	2.13414e+07	11.34	4.81641e-08	4.81641
		SIP_700_Bin0	700mSIPHEX1_0_scaffold_2413_c1	700mSIPHEX1	1881949	3614	700mSIPHEX1	8.07015	235445848	29165.5	2.13414e+07	11.34	4.81641e-08	4.81641
		SIP_700_Bin0	700mSIPHEX1_0_scaffold_2430_c1	700mSIPHEX1	1881949	3598	700mSIPHEX1	9.55771	235445848	34388.6	2.13414e+07	11.34	4.81641e-08	4.81641
		SIP_700_Bin0	700mSIPHEX1_0_scaffold_2437_c1	700mSIPHEX1	1881949	3593	700mSIPHEX1	10.036	235445848	36059.3	2.13414e+07	11.34	4.81641e-08	4.81641
		SIP_700_Bin0	700mSIPHEX1_0_scaffold_2442_c1	700mSIPHEX1	1881949	3584	700mSIPHEX1	13.1043	235445848	46965.8	2.13414e+07	11.34	4.81641e-08	4.81641
		SIP_700_Bin0	700mSIPHEX1_0_scaffold_2445_c1	700mSIPHEX1	1881949	3582	700mSIPHEX1	11.5766	235445848	41467.4	2.13414e+07	11.34	4.81641e-08	4.81641
		SIP_700_Bin0	700mSIPHEX1_0_scaffold_2447_c1	700mSIPHEX1	1881949	3581	700mSIPHEX1	9.73331	235445848	34855	2.13414e+07	11.34	4.81641e-08	4.81641
		SIP_700_Bin0	700mSIPHEX1_0_scaffold_2449_c1	700mSIPHEX1	1881949	3575	700mSIPHEX1	12.1469	235445848	43425.2	2.13414e+07	11.34	4.81641e-08	4.81641
		SIP_700_Bin0	700mSIPHEX1_0_scaffold_2450_c1	700mSIPHEX1	1881949	3573	700mSIPHEX1	11.2559	235445848	40217.3	2.13414e+07	11.34	4.81641e-08	4.81641
		SIP_700_Bin0	700mSIPHEX1_0_scaffold_2453_c1	700mSIPHEX1	1881949	3565	700mSIPHEX1	15.2662	235445848	54424	2.13414e+07	11.34	4.81641e-08	4.81641
		SIP_700_Bin0	700mSIPHEX1_0_scaffold_2457_c1	700mSIPHEX1	1881949	3557	700mSIPHEX1	10.081	235445848	35858.1	2.13414e+07	11.34	4.81641e-08	4.81641
		SIP_700_Bin0	700mSIPHEX1_0_scaffold_2233_c2	700mSIPHEX1	1881949	3555	700mSIPHEX1	12.3653	235445848	43958.6	2.13414e+07	11.34	4.81641e-08	4.81641
		SIP_700_Bin0	700mSIPHEX1_0_scaffold_2463_c1	700mSIPHEX1	1881949	3548	700mSIPHEX1	4.09329	235445848	14523	2.13414e+07	11.34	4.81641e-08	4.81641
		SIP_700_Bin0	700mSIPHEX1_0_scaffold_2465_c1	700mSIPHEX1	1881949	3547	700mSIPHEX1	11.995	235445848	42546.3	2.13414e+07	11.34	4.81641e-08	4.81641
		SIP_700_Bin0	700mSIPHEX1_0_scaffold_2478_c1	700mSIPHEX1	1881949	3535	700mSIPHEX1	11.7923	235445848	41685.8	2.13414e+07	11.34	4.81641e-08	4.81641
		SIP_700_Bin0	700mSIPHEX1_0_scaffold_1986_c2	700mSIPHEX1	1881949	3518	700mSIPHEX1	13.5606	235445848	47706.2	2.13414e+07	11.34	4.81641e-08	4.81641
		SIP_700_Bin0	700mSIPHEX1_0_scaffold_2501_c1	700mSIPHEX1	1881949	3510	700mSIPHEX1	13.6943	235445848	48067	2.13414e+07	11.34	4.81641e-08	4.81641
		SIP_700_Bin0	700mSIPHEX1_0_scaffold_2509_c1	700mSIPHEX1	1881949	3502	700mSIPHEX1	11.0271	235445848	38616.9	2.13414e+07	11.34	4.81641e-08	4.81641
		SIP_700_Bin0	700mSIPHEX1_0_scaffold_2511_c1	700mSIPHEX1	1881949	3501	700mSIPHEX1	13.3835	235445848	46855.6	2.13414e+07	11.34	4.81641e-08	4.81641
		SIP_700_Bin0	700mSIPHEX1_0_scaffold_2523_c1	700mSIPHEX1	1881949	3488	700mSIPHEX1	9.83703	235445848	34311.6	2.13414e+07	11.34	4.81641e-08	4.81641
		SIP_700_Bin0	700mSIPHEX1_0_scaffold_2524_c1	700mSIPHEX1	1881949	3487	700mSIPHEX1	9.87714	235445848	34441.6	2.13414e+07	11.34	4.81641e-08	4.81641
		SIP_700_Bin0	700mSIPHEX1_0_scaffold_2539_c1	700mSIPHEX1	1881949	3463	700mSIPHEX1	12.2496	235445848	42420.4	2.13414e+07	11.34	4.81641e-08	4.81641
		SIP_700_Bin0	700mSIPHEX1_0_scaffold_2542_c1	700mSIPHEX1	1881949	3460	700mSIPHEX1	12.4018	235445848	42910.2	2.13414e+07	11.34	4.81641e-08	4.81641
		SIP_700_Bin0	700mSIPHEX1_0_scaffold_2546_c1	700mSIPHEX1	1881949	3456	700mSIPHEX1	14.2871	235445848	49376.2	2.13414e+07	11.34	4.81641e-08	4.81641
		SIP_700_Bin0	700mSIPHEX1_0_scaffold_2553_c1	700mSIPHEX1	1881949	3449	700mSIPHEX1	10.5044	235445848	36229.7	2.13414e+07	11.34	4.81641e-08	4.81641
		SIP_700_Bin0	700mSIPHEX1_0_scaffold_2558_c1	700mSIPHEX1	1881949	3443	700mSIPHEX1	11.6945	235445848	40264.2	2.13414e+07	11.34	4.81641e-08	4.81641
		SIP_700_Bin0	700mSIPHEX1_0_scaffold_2567_c1	700mSIPHEX1	1881949	3436	700mSIPHEX1	10.9379	235445848	37582.6	2.13414e+07	11.34	4.81641e-08	4.81641
		SIP_700_Bin0	700mSIPHEX1_0_scaffold_2566_c1	700mSIPHEX1	1881949	3436	700mSIPHEX1	8.93335	235445848	30695	2.13414e+07	11.34	4.81641e-08	4.81641
		SIP_700_Bin0	700mSIPHEX1_0_scaffold_2574_c1	700mSIPHEX1	1881949	3427	700mSIPHEX1	13.9786	235445848	47904.7	2.13414e+07	11.34	4.81641e-08	4.81641
		SIP_700_Bin0	700mSIPHEX1_0_scaffold_2582_c1	700mSIPHEX1	1881949	3421	700mSIPHEX1	9.82116	235445848	33598.2	2.13414e+07	11.34	4.81641e-08	4.81641
		SIP_700_Bin0	700mSIPHEX1_0_scaffold_2599_c1	700mSIPHEX1	1881949	3402	700mSIPHEX1	14.6036	235445848	49681.4	2.13414e+07	11.34	4.81641e-08	4.81641
		SIP_700_Bin0	700mSIPHEX1_0_scaffold_2610_c1	700mSIPHEX1	1881949	3387	700mSIPHEX1	12.7309	235445848	43119.6	2.13414e+07	11.34	4.81641e-08	4.81641
		SIP_700_Bin0	700mSIPHEX1_0_scaffold_2609_c1	700mSIPHEX1	1881949	3387	700mSIPHEX1	9.14952	235445848	30989.4	2.13414e+07	11.34	4.81641e-08	4.81641
		SIP_700_Bin0	700mSIPHEX1_0_scaffold_2612_c1	700mSIPHEX1	1881949	3385	700mSIPHEX1	11.5975	235445848	39257.5	2.13414e+07	11.34	4.81641e-08	4.81641
		SIP_700_Bin0	700mSIPHEX1_0_scaffold_2627_c1	700mSIPHEX1	1881949	3373	700mSIPHEX1	10.7887	235445848	36390.3	2.13414e+07	11.34	4.81641e-08	4.81641
		SIP_700_Bin0	700mSIPHEX1_0_scaffold_2630_c1	700mSIPHEX1	1881949	3369	700mSIPHEX1	11.1252	235445848	37480.8	2.13414e+07	11.34	4.81641e-08	4.81641
		SIP_700_Bin0	700mSIPHEX1_0_scaffold_2634_c1	700mSIPHEX1	1881949	3366	700mSIPHEX1	8.12282	235445848	27341.4	2.13414e+07	11.34	4.81641e-08	4.81641
		SIP_700_Bin0	700mSIPHEX1_0_scaffold_2636_c1	700mSIPHEX1	1881949	3365	700mSIPHEX1	17.288	235445848	58174.1	2.13414e+07	11.34	4.81641e-08	4.81641
		SIP_700_Bin0	700mSIPHEX1_0_scaffold_2640_c1	700mSIPHEX1	1881949	3362	700mSIPHEX1	11.0725	235445848	37225.7	2.13414e+07	11.34	4.81641e-08	4.81641
		SIP_700_Bin0	700mSIPHEX1_0_scaffold_2642_c1	700mSIPHEX1	1881949	3358	700mSIPHEX1	10.851	235445848	36437.7	2.13414e+07	11.34	4.81641e-08	4.81641
		SIP_700_Bin0	700mSIPHEX1_0_scaffold_2372_c2	700mSIPHEX1	1881949	3357	700mSIPHEX1	12.2123	235445848	40996.7	2.13414e+07	11.34	4.81641e-08	4.81641
		SIP_700_Bin0	700mSIPHEX1_0_scaffold_2650_c1	700mSIPHEX1	1881949	3353	700mSIPHEX1	11.3981	235445848	38217.8	2.13414e+07	11.34	4.81641e-08	4.81641
		SIP_700_Bin0	700mSIPHEX1_0_scaffold_2648_c1	700mSIPHEX1	1881949	3353	700mSIPHEX1	6.75211	235445848	22639.8	2.13414e+07	11.34	4.81641e-08	4.81641
		SIP_700_Bin0	700mSIPHEX1_0_scaffold_2652_c1	700mSIPHEX1	1881949	3352	700mSIPHEX1	12.5974	235445848	42226.5	2.13414e+07	11.34	4.81641e-08	4.81641
		SIP_700_Bin0	700mSIPHEX1_0_scaffold_2662_c1	700mSIPHEX1	1881949	3346	700mSIPHEX1	11.3129	235445848	37853	2.13414e+07	11.34	4.81641e-08	4.81641
		SIP_700_Bin0	700mSIPHEX1_0_scaffold_2663_c1	700mSIPHEX1	1881949	3345	700mSIPHEX1	12.1915	235445848	40780.6	2.13414e+07	11.34	4.81641e-08	4.81641
		SIP_700_Bin0	700mSIPHEX1_0_scaffold_1781_c2	700mSIPHEX1	1881949	3343	700mSIPHEX1	11.4854	235445848	38395.7	2.13414e+07	11.34	4.81641e-08	4.81641
		SIP_700_Bin0	700mSIPHEX1_0_scaffold_2674_c1	700mSIPHEX1	1881949	3331	700mSIPHEX1	12.7281	235445848	42397.3	2.13414e+07	11.34	4.81641e-08	4.81641
		SIP_700_Bin0	700mSIPHEX1_0_scaffold_2678_c1	700mSIPHEX1	1881949	3322	700mSIPHEX1	11.7718	235445848	39105.9	2.13414e+07	11.34	4.81641e-08	4.81641
		SIP_700_Bin0	700mSIPHEX1_0_scaffold_2686_c1	700mSIPHEX1	1881949	3316	700mSIPHEX1	10.0938	235445848	33471	2.13414e+07	11.34	4.81641e-08	4.81641
		SIP_700_Bin0	700mSIPHEX1_0_scaffold_2685_c1	700mSIPHEX1	1881949	3316	700mSIPHEX1	9.82407	235445848	32576.6	2.13414e+07	11.34	4.81641e-08	4.81641
		SIP_700_Bin0	700mSIPHEX1_0_scaffold_2691_c1	700mSIPHEX1	1881949	3309	700mSIPHEX1	10.8294	235445848	35834.5	2.13414e+07	11.34	4.81641e-08	4.81641
		SIP_700_Bin0	700mSIPHEX1_0_scaffold_2697_c1	700mSIPHEX1	1881949	3306	700mSIPHEX1	8.78992	235445848	29059.5	2.13414e+07	11.34	4.81641e-08	4.81641
		SIP_700_Bin0	700mSIPHEX1_0_scaffold_2701_c1	700mSIPHEX1	1881949	3301	700mSIPHEX1	14.9629	235445848	49392.5	2.13414e+07	11.34	4.81641e-08	4.81641
		SIP_700_Bin0	700mSIPHEX1_0_scaffold_2703_c1	700mSIPHEX1	1881949	3299	700mSIPHEX1	9.90727	235445848	32684.1	2.13414e+07	11.34	4.81641e-08	4.81641
		SIP_700_Bin0	700mSIPHEX1_0_scaffold_1838_c1	700mSIPHEX1	1881949	3293	700mSIPHEX1	8.63411	235445848	28432.1	2.13414e+07	11.34	4.81641e-08	4.81641
		SIP_700_Bin0	700mSIPHEX1_0_scaffold_2715_c1	700mSIPHEX1	1881949	3285	700mSIPHEX1	12.2829	235445848	40349.3	2.13414e+07	11.34	4.81641e-08	4.81641
		SIP_700_Bin0	700mSIPHEX1_0_scaffold_2719_c1	700mSIPHEX1	1881949	3279	700mSIPHEX1	10.0051	235445848	32806.7	2.13414e+07	11.34	4.81641e-08	4.81641
		SIP_700_Bin0	700mSIPHEX1_0_scaffold_2732_c1	700mSIPHEX1	1881949	3257	700mSIPHEX1	12.5243	235445848	40791.6	2.13414e+07	11.34	4.81641e-08	4.81641
		SIP_700_Bin0	700mSIPHEX1_0_scaffold_2740_c1	700mSIPHEX1	1881949	3248	700mSIPHEX1	14.6685	235445848	47643.3	2.13414e+07	11.34	4.81641e-08	4.81641
		SIP_700_Bin0	700mSIPHEX1_0_scaffold_2739_c1	700mSIPHEX1	1881949	3248	700mSIPHEX1	13.4587	235445848	43713.9	2.13414e+07	11.34	4.81641e-08	4.81641
		SIP_700_Bin0	700mSIPHEX1_0_scaffold_2753_c1	700mSIPHEX1	1881949	3237	700mSIPHEX1	10.9281	235445848	35374.3	2.13414e+07	11.34	4.81641e-08	4.81641
		SIP_700_Bin0	700mSIPHEX1_0_scaffold_2759_c1	700mSIPHEX1	1881949	3233	700mSIPHEX1	12.2018	235445848	39448.4	2.13414e+07	11.34	4.81641e-08	4.81641
		SIP_700_Bin0	700mSIPHEX1_0_scaffold_2761_c1	700mSIPHEX1	1881949	3231	700mSIPHEX1	10.3408	235445848	33411.1	2.13414e+07	11.34	4.81641e-08	4.81641
		SIP_700_Bin0	700mSIPHEX1_0_scaffold_2765_c1	700mSIPHEX1	1881949	3229	700mSIPHEX1	12.3638	235445848	39922.7	2.13414e+07	11.34	4.81641e-08	4.81641
		SIP_700_Bin0	700mSIPHEX1_0_scaffold_2764_c1	700mSIPHEX1	1881949	3229	700mSIPHEX1	6.73855	235445848	21758.8	2.13414e+07	11.34	4.81641e-08	4.81641
		SIP_700_Bin0	700mSIPHEX1_0_scaffold_2773_c1	700mSIPHEX1	1881949	3220	700mSIPHEX1	12.0648	235445848	38848.7	2.13414e+07	11.34	4.81641e-08	4.81641
		SIP_700_Bin0	700mSIPHEX1_0_scaffold_2775_c1	700mSIPHEX1	1881949	3219	700mSIPHEX1	8.2333	235445848	26503	2.13414e+07	11.34	4.81641e-08	4.81641
		SIP_700_Bin0	700mSIPHEX1_0_scaffold_2779_c1	700mSIPHEX1	1881949	3215	700mSIPHEX1	11.2166	235445848	36061.4	2.13414e+07	11.34	4.81641e-08	4.81641
		SIP_700_Bin0	700mSIPHEX1_0_scaffold_2782_c1	700mSIPHEX1	1881949	3214	700mSIPHEX1	10.344	235445848	33245.6	2.13414e+07	11.34	4.81641e-08	4.81641
		SIP_700_Bin0	700mSIPHEX1_0_scaffold_2781_c1	700mSIPHEX1	1881949	3214	700mSIPHEX1	11.0336	235445848	35462	2.13414e+07	11.34	4.81641e-08	4.81641
		SIP_700_Bin0	700mSIPHEX1_0_scaffold_2787_c1	700mSIPHEX1	1881949	3210	700mSIPHEX1	12.9915	235445848	41702.7	2.13414e+07	11.34	4.81641e-08	4.81641
		SIP_700_Bin0	700mSIPHEX1_0_scaffold_2792_c1	700mSIPHEX1	1881949	3206	700mSIPHEX1	11.1263	235445848	35670.9	2.13414e+07	11.34	4.81641e-08	4.81641
		SIP_700_Bin0	700mSIPHEX1_0_scaffold_2816_c1	700mSIPHEX1	1881949	3177	700mSIPHEX1	10.9349	235445848	34740.2	2.13414e+07	11.34	4.81641e-08	4.81641
		SIP_700_Bin0	700mSIPHEX1_0_scaffold_2826_c1	700mSIPHEX1	1881949	3171	700mSIPHEX1	13.7382	235445848	43563.8	2.13414e+07	11.34	4.81641e-08	4.81641
		SIP_700_Bin0	700mSIPHEX1_0_scaffold_2829_c1	700mSIPHEX1	1881949	3169	700mSIPHEX1	11.8635	235445848	37595.4	2.13414e+07	11.34	4.81641e-08	4.81641
		SIP_700_Bin0	700mSIPHEX1_0_scaffold_2830_c1	700mSIPHEX1	1881949	3168	700mSIPHEX1	10.4781	235445848	33194.6	2.13414e+07	11.34	4.81641e-08	4.81641
		SIP_700_Bin0	700mSIPHEX1_0_scaffold_2841_c1	700mSIPHEX1	1881949	3161	700mSIPHEX1	9.80372	235445848	30989.6	2.13414e+07	11.34	4.81641e-08	4.81641
		SIP_700_Bin0	700mSIPHEX1_0_scaffold_2844_c1	700mSIPHEX1	1881949	3159	700mSIPHEX1	11.5008	235445848	36331	2.13414e+07	11.34	4.81641e-08	4.81641
		SIP_700_Bin0	700mSIPHEX1_0_scaffold_2851_c1	700mSIPHEX1	1881949	3152	700mSIPHEX1	12.2465	235445848	38601	2.13414e+07	11.34	4.81641e-08	4.81641
		SIP_700_Bin0	700mSIPHEX1_0_scaffold_2858_c1	700mSIPHEX1	1881949	3146	700mSIPHEX1	16.8331	235445848	52956.9	2.13414e+07	11.34	4.81641e-08	4.81641
		SIP_700_Bin0	700mSIPHEX1_0_scaffold_1776_c1	700mSIPHEX1	1881949	3132	700mSIPHEX1	9.24111	235445848	28943.2	2.13414e+07	11.34	4.81641e-08	4.81641
		SIP_700_Bin0	700mSIPHEX1_0_scaffold_2876_c1	700mSIPHEX1	1881949	3130	700mSIPHEX1	11.8362	235445848	37047.3	2.13414e+07	11.34	4.81641e-08	4.81641
		SIP_700_Bin0	700mSIPHEX1_0_scaffold_2882_c1	700mSIPHEX1	1881949	3124	700mSIPHEX1	10.3722	235445848	32402.8	2.13414e+07	11.34	4.81641e-08	4.81641
		SIP_700_Bin0	700mSIPHEX1_0_scaffold_2886_c1	700mSIPHEX1	1881949	3121	700mSIPHEX1	9.69236	235445848	30249.9	2.13414e+07	11.34	4.81641e-08	4.81641
		SIP_700_Bin0	700mSIPHEX1_0_scaffold_2885_c1	700mSIPHEX1	1881949	3121	700mSIPHEX1	9.48199	235445848	29593.3	2.13414e+07	11.34	4.81641e-08	4.81641
		SIP_700_Bin0	700mSIPHEX1_0_scaffold_2900_c1	700mSIPHEX1	1881949	3106	700mSIPHEX1	9.86231	235445848	30632.3	2.13414e+07	11.34	4.81641e-08	4.81641
		SIP_700_Bin0	700mSIPHEX1_0_scaffold_2904_c1	700mSIPHEX1	1881949	3105	700mSIPHEX1	12.203	235445848	37890.3	2.13414e+07	11.34	4.81641e-08	4.81641
		SIP_700_Bin0	700mSIPHEX1_0_scaffold_2907_c1	700mSIPHEX1	1881949	3103	700mSIPHEX1	9.97697	235445848	30958.5	2.13414e+07	11.34	4.81641e-08	4.81641
		SIP_700_Bin0	700mSIPHEX1_0_scaffold_2910_c1	700mSIPHEX1	1881949	3100	700mSIPHEX1	9.58339	235445848	29708.5	2.13414e+07	11.34	4.81641e-08	4.81641
		SIP_700_Bin0	700mSIPHEX1_0_scaffold_2914_c1	700mSIPHEX1	1881949	3097	700mSIPHEX1	11.3244	235445848	35071.7	2.13414e+07	11.34	4.81641e-08	4.81641
		SIP_700_Bin0	700mSIPHEX1_0_scaffold_2920_c1	700mSIPHEX1	1881949	3091	700mSIPHEX1	8.95988	235445848	27695	2.13414e+07	11.34	4.81641e-08	4.81641
		SIP_700_Bin0	700mSIPHEX1_0_scaffold_2922_c1	700mSIPHEX1	1881949	3090	700mSIPHEX1	8.04728	235445848	24866.1	2.13414e+07	11.34	4.81641e-08	4.81641
		SIP_700_Bin0	700mSIPHEX1_0_scaffold_2924_c1	700mSIPHEX1	1881949	3088	700mSIPHEX1	8.03404	235445848	24809.1	2.13414e+07	11.34	4.81641e-08	4.81641
		SIP_700_Bin0	700mSIPHEX1_0_scaffold_2929_c1	700mSIPHEX1	1881949	3086	700mSIPHEX1	10.8811	235445848	33579.1	2.13414e+07	11.34	4.81641e-08	4.81641
		SIP_700_Bin0	700mSIPHEX1_0_scaffold_2932_c1	700mSIPHEX1	1881949	3085	700mSIPHEX1	8.80102	235445848	27151.1	2.13414e+07	11.34	4.81641e-08	4.81641
		SIP_700_Bin0	700mSIPHEX1_0_scaffold_1909_c2	700mSIPHEX1	1881949	3080	700mSIPHEX1	14.0474	235445848	43266	2.13414e+07	11.34	4.81641e-08	4.81641
		SIP_700_Bin0	700mSIPHEX1_0_scaffold_2946_c1	700mSIPHEX1	1881949	3068	700mSIPHEX1	14.3437	235445848	44006.5	2.13414e+07	11.34	4.81641e-08	4.81641
		SIP_700_Bin0	700mSIPHEX1_0_scaffold_2953_c1	700mSIPHEX1	1881949	3062	700mSIPHEX1	15.0045	235445848	45943.8	2.13414e+07	11.34	4.81641e-08	4.81641
		SIP_700_Bin0	700mSIPHEX1_0_scaffold_2961_c1	700mSIPHEX1	1881949	3058	700mSIPHEX1	10.6461	235445848	32555.8	2.13414e+07	11.34	4.81641e-08	4.81641
		SIP_700_Bin0	700mSIPHEX1_0_scaffold_2963_c1	700mSIPHEX1	1881949	3056	700mSIPHEX1	5.0905	235445848	15556.6	2.13414e+07	11.34	4.81641e-08	4.81641
		SIP_700_Bin0	700mSIPHEX1_0_scaffold_2966_c1	700mSIPHEX1	1881949	3053	700mSIPHEX1	10.7485	235445848	32815.2	2.13414e+07	11.34	4.81641e-08	4.81641
		SIP_700_Bin0	700mSIPHEX1_0_scaffold_2968_c1	700mSIPHEX1	1881949	3052	700mSIPHEX1	10.6413	235445848	32477.2	2.13414e+07	11.34	4.81641e-08	4.81641
		SIP_700_Bin0	700mSIPHEX1_0_scaffold_2971_c1	700mSIPHEX1	1881949	3050	700mSIPHEX1	10.2779	235445848	31347.6	2.13414e+07	11.34	4.81641e-08	4.81641
		SIP_700_Bin0	700mSIPHEX1_0_scaffold_2975_c1	700mSIPHEX1	1881949	3048	700mSIPHEX1	9.49034	235445848	28926.6	2.13414e+07	11.34	4.81641e-08	4.81641
		SIP_700_Bin0	700mSIPHEX1_0_scaffold_2979_c1	700mSIPHEX1	1881949	3045	700mSIPHEX1	12.3098	235445848	37483.3	2.13414e+07	11.34	4.81641e-08	4.81641
		SIP_700_Bin0	700mSIPHEX1_0_scaffold_2980_c1	700mSIPHEX1	1881949	3042	700mSIPHEX1	12.9786	235445848	39480.9	2.13414e+07	11.34	4.81641e-08	4.81641
		SIP_700_Bin0	700mSIPHEX1_0_scaffold_2984_c1	700mSIPHEX1	1881949	3040	700mSIPHEX1	10.6578	235445848	32399.7	2.13414e+07	11.34	4.81641e-08	4.81641
		SIP_700_Bin0	700mSIPHEX1_0_scaffold_2987_c1	700mSIPHEX1	1881949	3038	700mSIPHEX1	11.9813	235445848	36399.2	2.13414e+07	11.34	4.81641e-08	4.81641
		SIP_700_Bin0	700mSIPHEX1_0_scaffold_2989_c1	700mSIPHEX1	1881949	3034	700mSIPHEX1	9.86442	235445848	29928.7	2.13414e+07	11.34	4.81641e-08	4.81641
		SIP_700_Bin0	700mSIPHEX1_0_scaffold_3007_c1	700mSIPHEX1	1881949	3020	700mSIPHEX1	11.2359	235445848	33932.4	2.13414e+07	11.34	4.81641e-08	4.81641
		SIP_700_Bin0	700mSIPHEX1_0_scaffold_3009_c1	700mSIPHEX1	1881949	3019	700mSIPHEX1	10.7989	235445848	32601.9	2.13414e+07	11.34	4.81641e-08	4.81641
		SIP_700_Bin0	700mSIPHEX1_0_scaffold_3031_c1	700mSIPHEX1	1881949	3003	700mSIPHEX1	12.4318	235445848	37332.7	2.13414e+07	11.34	4.81641e-08	4.81641
		SIP_700_Bin21	700mSIPHEX2_21_scaffold_1_c1	700mSIPHEX2	3786831	1156080	700mSIPHEX2	4278.21	330280538	4.94595e+09	1.62552e+10	4292.56	1.29967e-05	1299.67
		SIP_700_Bin21	700mSIPHEX2_21_scaffold_5_c1	700mSIPHEX2	3786831	602707	700mSIPHEX2	4548.34	330280538	2.74132e+09	1.62552e+10	4292.56	1.29967e-05	1299.67
		SIP_700_Bin21	700mSIPHEX2_21_scaffold_7_c1	700mSIPHEX2	3786831	578285	700mSIPHEX2	4318.29	330280538	2.4972e+09	1.62552e+10	4292.56	1.29967e-05	1299.67
		SIP_700_Bin21	700mSIPHEX2_21_scaffold_11_c1	700mSIPHEX2	3786831	483303	700mSIPHEX2	4395.66	330280538	2.12444e+09	1.62552e+10	4292.56	1.29967e-05	1299.67
		SIP_700_Bin21	700mSIPHEX2_21_scaffold_47_c1	700mSIPHEX2	3786831	247233	700mSIPHEX2	4090.28	330280538	1.01125e+09	1.62552e+10	4292.56	1.29967e-05	1299.67
		SIP_700_Bin21	700mSIPHEX2_21_scaffold_57_c1	700mSIPHEX2	3786831	226414	700mSIPHEX2	3694.48	330280538	8.36482e+08	1.62552e+10	4292.56	1.29967e-05	1299.67
		SIP_700_Bin21	700mSIPHEX2_21_scaffold_122_c1	700mSIPHEX2	3786831	110215	700mSIPHEX2	4301.85	330280538	4.74128e+08	1.62552e+10	4292.56	1.29967e-05	1299.67
		SIP_700_Bin21	700mSIPHEX2_21_scaffold_134_c1	700mSIPHEX2	3786831	100791	700mSIPHEX2	4654.35	330280538	4.69117e+08	1.62552e+10	4292.56	1.29967e-05	1299.67
		SIP_700_Bin21	700mSIPHEX2_21_scaffold_138_c1	700mSIPHEX2	3786831	97808	700mSIPHEX2	4356.12	330280538	4.26063e+08	1.62552e+10	4292.56	1.29967e-05	1299.67
		SIP_700_Bin21	700mSIPHEX2_21_scaffold_166_c1	700mSIPHEX2	3786831	79239	700mSIPHEX2	3937.98	330280538	3.12042e+08	1.62552e+10	4292.56	1.29967e-05	1299.67
		SIP_700_Bin21	700mSIPHEX2_21_scaffold_195_c1	700mSIPHEX2	3786831	64690	700mSIPHEX2	4078.24	330280538	2.63821e+08	1.62552e+10	4292.56	1.29967e-05	1299.67
		SIP_700_Bin21	700mSIPHEX2_21_scaffold_285_c1	700mSIPHEX2	3786831	40070	700mSIPHEX2	3827.79	330280538	1.5338e+08	1.62552e+10	4292.56	1.29967e-05	1299.67
		SIP_700_Bin14	700mSIPHEX2_14_scaffold_2_c2	700mSIPHEX2	3545922	945042	700mSIPHEX2	157.423	330280538	1.48771e+08	6.0462e+08	170.511	5.16262e-07	51.6262
		SIP_700_Bin14	700mSIPHEX2_14_scaffold_10_c1	700mSIPHEX2	3545922	508649	700mSIPHEX2	184.687	330280538	9.39409e+07	6.0462e+08	170.511	5.16262e-07	51.6262
		SIP_700_Bin14	700mSIPHEX2_14_scaffold_14_c1	700mSIPHEX2	3545922	458266	700mSIPHEX2	196.324	330280538	8.99686e+07	6.0462e+08	170.511	5.16262e-07	51.6262
		SIP_700_Bin14	700mSIPHEX2_14_scaffold_17_c1	700mSIPHEX2	3545922	446616	700mSIPHEX2	163.755	330280538	7.31356e+07	6.0462e+08	170.511	5.16262e-07	51.6262
		SIP_700_Bin14	700mSIPHEX2_14_scaffold_26_c2	700mSIPHEX2	3545922	344525	700mSIPHEX2	149.986	330280538	5.16739e+07	6.0462e+08	170.511	5.16262e-07	51.6262
		SIP_700_Bin14	700mSIPHEX2_14_scaffold_34_c1	700mSIPHEX2	3545922	296487	700mSIPHEX2	184.377	330280538	5.46654e+07	6.0462e+08	170.511	5.16262e-07	51.6262
		SIP_700_Bin14	700mSIPHEX2_14_scaffold_2_c4	700mSIPHEX2	3545922	204220	700mSIPHEX2	166.761	330280538	3.40559e+07	6.0462e+08	170.511	5.16262e-07	51.6262
		SIP_700_Bin14	700mSIPHEX2_14_scaffold_88_c1	700mSIPHEX2	3545922	157414	700mSIPHEX2	165.411	330280538	2.6038e+07	6.0462e+08	170.511	5.16262e-07	51.6262
		SIP_700_Bin14	700mSIPHEX2_14_scaffold_115_c1	700mSIPHEX2	3545922	118327	700mSIPHEX2	173.578	330280538	2.0539e+07	6.0462e+08	170.511	5.16262e-07	51.6262
		SIP_700_Bin14	700mSIPHEX2_14_scaffold_211_c1	700mSIPHEX2	3545922	59231	700mSIPHEX2	156.675	330280538	9.28002e+06	6.0462e+08	170.511	5.16262e-07	51.6262
		SIP_700_Bin14	700mSIPHEX2_14_scaffold_2197_c1	700mSIPHEX2	3545922	3959	700mSIPHEX2	352.71	330280538	1.39638e+06	6.0462e+08	170.511	5.16262e-07	51.6262
		SIP_700_Bin14	700mSIPHEX2_14_scaffold_2912_c1	700mSIPHEX2	3545922	3186	700mSIPHEX2	362.392	330280538	1.15458e+06	6.0462e+08	170.511	5.16262e-07	51.6262
		SIP_700_Bin24	700mSIPHEX2_24_scaffold_3_c1	700mSIPHEX2	2571546	676425	700mSIPHEX2	825.928	330280538	5.58678e+08	2.15264e+09	837.099	2.53451e-06	253.451
		SIP_700_Bin24	700mSIPHEX2_24_scaffold_21_c1	700mSIPHEX2	2571546	414785	700mSIPHEX2	841.717	330280538	3.49132e+08	2.15264e+09	837.099	2.53451e-06	253.451
		SIP_700_Bin24	700mSIPHEX2_24_scaffold_33_c1	700mSIPHEX2	2571546	297570	700mSIPHEX2	827.972	330280538	2.4638e+08	2.15264e+09	837.099	2.53451e-06	253.451
		SIP_700_Bin24	700mSIPHEX2_24_scaffold_52_c1	700mSIPHEX2	2571546	236601	700mSIPHEX2	825.619	330280538	1.95342e+08	2.15264e+09	837.099	2.53451e-06	253.451
		SIP_700_Bin24	700mSIPHEX2_24_scaffold_65_c1	700mSIPHEX2	2571546	204992	700mSIPHEX2	847.769	330280538	1.73786e+08	2.15264e+09	837.099	2.53451e-06	253.451
		SIP_700_Bin24	700mSIPHEX2_24_scaffold_68_c1	700mSIPHEX2	2571546	192643	700mSIPHEX2	851.665	330280538	1.64067e+08	2.15264e+09	837.099	2.53451e-06	253.451
		SIP_700_Bin24	700mSIPHEX2_24_scaffold_116_c1	700mSIPHEX2	2571546	117680	700mSIPHEX2	862.756	330280538	1.01529e+08	2.15264e+09	837.099	2.53451e-06	253.451
		SIP_700_Bin24	700mSIPHEX2_24_scaffold_139_c1	700mSIPHEX2	2571546	96367	700mSIPHEX2	829.682	330280538	7.9954e+07	2.15264e+09	837.099	2.53451e-06	253.451
		SIP_700_Bin24	700mSIPHEX2_24_scaffold_155_c1	700mSIPHEX2	2571546	85408	700mSIPHEX2	901.831	330280538	7.70236e+07	2.15264e+09	837.099	2.53451e-06	253.451
		SIP_700_Bin24	700mSIPHEX2_24_scaffold_176_c1	700mSIPHEX2	2571546	72210	700mSIPHEX2	842.522	330280538	6.08385e+07	2.15264e+09	837.099	2.53451e-06	253.451
		SIP_700_Bin24	700mSIPHEX2_24_scaffold_135_c1	700mSIPHEX2	2571546	60036	700mSIPHEX2	828.546	330280538	4.97426e+07	2.15264e+09	837.099	2.53451e-06	253.451
		SIP_700_Bin24	700mSIPHEX2_24_scaffold_135_c2	700mSIPHEX2	2571546	39237	700mSIPHEX2	822.812	330280538	3.22847e+07	2.15264e+09	837.099	2.53451e-06	253.451
		SIP_700_Bin24	700mSIPHEX2_24_scaffold_300_c1	700mSIPHEX2	2571546	37024	700mSIPHEX2	844.641	330280538	3.1272e+07	2.15264e+09	837.099	2.53451e-06	253.451
		SIP_700_Bin24	700mSIPHEX2_24_scaffold_368_c1	700mSIPHEX2	2571546	28123	700mSIPHEX2	797.665	330280538	2.24327e+07	2.15264e+09	837.099	2.53451e-06	253.451
		SIP_700_Bin24	700mSIPHEX2_24_scaffold_1172_c1	700mSIPHEX2	2571546	7096	700mSIPHEX2	846.952	330280538	6.00997e+06	2.15264e+09	837.099	2.53451e-06	253.451
		SIP_700_Bin24	700mSIPHEX2_24_scaffold_1595_c1	700mSIPHEX2	2571546	5349	700mSIPHEX2	778.747	330280538	4.16552e+06	2.15264e+09	837.099	2.53451e-06	253.451
		SIP_700_Bin9	700mSIPHEX2_9_scaffold_16_c1	700mSIPHEX2	3178790	453129	700mSIPHEX2	15.7475	330280538	7.13565e+06	4.72389e+07	14.8606	4.4994e-08	4.4994
		SIP_700_Bin9	700mSIPHEX2_9_scaffold_4_c2	700mSIPHEX2	3178790	357711	700mSIPHEX2	16.833	330280538	6.02135e+06	4.72389e+07	14.8606	4.4994e-08	4.4994
		SIP_700_Bin9	700mSIPHEX2_9_scaffold_19_c2	700mSIPHEX2	3178790	337660	700mSIPHEX2	14.892	330280538	5.02843e+06	4.72389e+07	14.8606	4.4994e-08	4.4994
		SIP_700_Bin9	700mSIPHEX2_9_scaffold_4_c1	700mSIPHEX2	3178790	313703	700mSIPHEX2	16.226	330280538	5.09014e+06	4.72389e+07	14.8606	4.4994e-08	4.4994
		SIP_700_Bin9	700mSIPHEX2_9_scaffold_46_c1	700mSIPHEX2	3178790	250330	700mSIPHEX2	16.5061	330280538	4.13197e+06	4.72389e+07	14.8606	4.4994e-08	4.4994
		SIP_700_Bin9	700mSIPHEX2_9_scaffold_79_c1	700mSIPHEX2	3178790	165873	700mSIPHEX2	15.1507	330280538	2.51309e+06	4.72389e+07	14.8606	4.4994e-08	4.4994
		SIP_700_Bin9	700mSIPHEX2_9_scaffold_90_c1	700mSIPHEX2	3178790	149585	700mSIPHEX2	14.0289	330280538	2.09851e+06	4.72389e+07	14.8606	4.4994e-08	4.4994
		SIP_700_Bin9	700mSIPHEX2_9_scaffold_102_c1	700mSIPHEX2	3178790	129196	700mSIPHEX2	15.6445	330280538	2.02121e+06	4.72389e+07	14.8606	4.4994e-08	4.4994
		SIP_700_Bin9	700mSIPHEX2_9_scaffold_108_c1	700mSIPHEX2	3178790	122397	700mSIPHEX2	14.4067	330280538	1.76334e+06	4.72389e+07	14.8606	4.4994e-08	4.4994
		SIP_700_Bin9	700mSIPHEX2_9_scaffold_125_c1	700mSIPHEX2	3178790	107577	700mSIPHEX2	14.9377	330280538	1.60695e+06	4.72389e+07	14.8606	4.4994e-08	4.4994
		SIP_700_Bin9	700mSIPHEX2_9_scaffold_144_c1	700mSIPHEX2	3178790	90010	700mSIPHEX2	16.4301	330280538	1.47887e+06	4.72389e+07	14.8606	4.4994e-08	4.4994
		SIP_700_Bin9	700mSIPHEX2_9_scaffold_153_c1	700mSIPHEX2	3178790	85826	700mSIPHEX2	14.9976	330280538	1.28718e+06	4.72389e+07	14.8606	4.4994e-08	4.4994
		SIP_700_Bin9	700mSIPHEX2_9_scaffold_199_c1	700mSIPHEX2	3178790	63278	700mSIPHEX2	14.3474	330280538	907875	4.72389e+07	14.8606	4.4994e-08	4.4994
		SIP_700_Bin9	700mSIPHEX2_9_scaffold_19_c3	700mSIPHEX2	3178790	59146	700mSIPHEX2	14.0835	330280538	832983	4.72389e+07	14.8606	4.4994e-08	4.4994
		SIP_700_Bin9	700mSIPHEX2_9_scaffold_224_c1	700mSIPHEX2	3178790	56514	700mSIPHEX2	16.0026	330280538	904371	4.72389e+07	14.8606	4.4994e-08	4.4994
		SIP_700_Bin9	700mSIPHEX2_9_scaffold_263_c1	700mSIPHEX2	3178790	44560	700mSIPHEX2	14.6002	330280538	650585	4.72389e+07	14.8606	4.4994e-08	4.4994
		SIP_700_Bin9	700mSIPHEX2_9_scaffold_240_c2	700mSIPHEX2	3178790	41850	700mSIPHEX2	14.5158	330280538	607486	4.72389e+07	14.8606	4.4994e-08	4.4994
		SIP_700_Bin9	700mSIPHEX2_9_scaffold_299_c1	700mSIPHEX2	3178790	37024	700mSIPHEX2	12.8789	330280538	476828	4.72389e+07	14.8606	4.4994e-08	4.4994
		SIP_700_Bin9	700mSIPHEX2_9_scaffold_354_c1	700mSIPHEX2	3178790	16925	700mSIPHEX2	14.5936	330280538	246997	4.72389e+07	14.8606	4.4994e-08	4.4994
		SIP_700_Bin9	700mSIPHEX2_9_scaffold_609_c1	700mSIPHEX2	3178790	14473	700mSIPHEX2	12.7487	330280538	184512	4.72389e+07	14.8606	4.4994e-08	4.4994
		SIP_700_Bin9	700mSIPHEX2_9_scaffold_650_c1	700mSIPHEX2	3178790	13320	700mSIPHEX2	7.72825	330280538	102940	4.72389e+07	14.8606	4.4994e-08	4.4994
		SIP_700_Bin9	700mSIPHEX2_9_scaffold_354_c2	700mSIPHEX2	3178790	12913	700mSIPHEX2	14.7153	330280538	190019	4.72389e+07	14.8606	4.4994e-08	4.4994
		SIP_700_Bin9	700mSIPHEX2_9_scaffold_698_c1	700mSIPHEX2	3178790	12302	700mSIPHEX2	7.03267	330280538	86515.9	4.72389e+07	14.8606	4.4994e-08	4.4994
		SIP_700_Bin9	700mSIPHEX2_9_scaffold_794_c1	700mSIPHEX2	3178790	10698	700mSIPHEX2	7.15245	330280538	76516.9	4.72389e+07	14.8606	4.4994e-08	4.4994
		SIP_700_Bin9	700mSIPHEX2_9_scaffold_841_c1	700mSIPHEX2	3178790	10049	700mSIPHEX2	7.55935	330280538	75963.9	4.72389e+07	14.8606	4.4994e-08	4.4994
		SIP_700_Bin9	700mSIPHEX2_9_scaffold_843_c1	700mSIPHEX2	3178790	10041	700mSIPHEX2	12.437	330280538	124880	4.72389e+07	14.8606	4.4994e-08	4.4994
		SIP_700_Bin9	700mSIPHEX2_9_scaffold_852_c1	700mSIPHEX2	3178790	9962	700mSIPHEX2	7.56655	330280538	75378	4.72389e+07	14.8606	4.4994e-08	4.4994
		SIP_700_Bin9	700mSIPHEX2_9_scaffold_240_c1	700mSIPHEX2	3178790	9707	700mSIPHEX2	13.3474	330280538	129563	4.72389e+07	14.8606	4.4994e-08	4.4994
		SIP_700_Bin9	700mSIPHEX2_9_scaffold_984_c1	700mSIPHEX2	3178790	8527	700mSIPHEX2	7.20234	330280538	61414.4	4.72389e+07	14.8606	4.4994e-08	4.4994
		SIP_700_Bin9	700mSIPHEX2_9_scaffold_1075_c1	700mSIPHEX2	3178790	7764	700mSIPHEX2	7.43446	330280538	57721.1	4.72389e+07	14.8606	4.4994e-08	4.4994
		SIP_700_Bin9	700mSIPHEX2_9_scaffold_941_c1	700mSIPHEX2	3178790	7320	700mSIPHEX2	8.05537	330280538	58965.3	4.72389e+07	14.8606	4.4994e-08	4.4994
		SIP_700_Bin9	700mSIPHEX2_9_scaffold_1159_c1	700mSIPHEX2	3178790	7198	700mSIPHEX2	6.82108	330280538	49098.1	4.72389e+07	14.8606	4.4994e-08	4.4994
		SIP_700_Bin9	700mSIPHEX2_9_scaffold_1176_c1	700mSIPHEX2	3178790	7074	700mSIPHEX2	7.54564	330280538	53377.9	4.72389e+07	14.8606	4.4994e-08	4.4994
		SIP_700_Bin9	700mSIPHEX2_9_scaffold_1221_c1	700mSIPHEX2	3178790	6826	700mSIPHEX2	6.52591	330280538	44545.9	4.72389e+07	14.8606	4.4994e-08	4.4994
		SIP_700_Bin9	700mSIPHEX2_9_scaffold_1224_c1	700mSIPHEX2	3178790	6815	700mSIPHEX2	7.68192	330280538	52352.3	4.72389e+07	14.8606	4.4994e-08	4.4994
		SIP_700_Bin9	700mSIPHEX2_9_scaffold_1225_c1	700mSIPHEX2	3178790	6811	700mSIPHEX2	6.69224	330280538	45580.8	4.72389e+07	14.8606	4.4994e-08	4.4994
		SIP_700_Bin9	700mSIPHEX2_9_scaffold_1338_c1	700mSIPHEX2	3178790	6220	700mSIPHEX2	8.17232	330280538	50831.8	4.72389e+07	14.8606	4.4994e-08	4.4994
		SIP_700_Bin9	700mSIPHEX2_9_scaffold_1339_c1	700mSIPHEX2	3178790	6216	700mSIPHEX2	6.97923	330280538	43382.9	4.72389e+07	14.8606	4.4994e-08	4.4994
		SIP_700_Bin9	700mSIPHEX2_9_scaffold_1432_c1	700mSIPHEX2	3178790	5876	700mSIPHEX2	6.38666	330280538	37528	4.72389e+07	14.8606	4.4994e-08	4.4994
		SIP_700_Bin9	700mSIPHEX2_9_scaffold_1480_c1	700mSIPHEX2	3178790	5727	700mSIPHEX2	7.27022	330280538	41636.5	4.72389e+07	14.8606	4.4994e-08	4.4994
		SIP_700_Bin9	700mSIPHEX2_9_scaffold_1526_c1	700mSIPHEX2	3178790	5558	700mSIPHEX2	6.82748	330280538	37947.1	4.72389e+07	14.8606	4.4994e-08	4.4994
		SIP_700_Bin9	700mSIPHEX2_9_scaffold_1644_c1	700mSIPHEX2	3178790	5212	700mSIPHEX2	7.20387	330280538	37546.6	4.72389e+07	14.8606	4.4994e-08	4.4994
		SIP_700_Bin9	700mSIPHEX2_9_scaffold_1648_c1	700mSIPHEX2	3178790	5191	700mSIPHEX2	7.13628	330280538	37044.4	4.72389e+07	14.8606	4.4994e-08	4.4994
		SIP_700_Bin9	700mSIPHEX2_9_scaffold_1101_c3	700mSIPHEX2	3178790	5073	700mSIPHEX2	8.2145	330280538	41672.2	4.72389e+07	14.8606	4.4994e-08	4.4994
		SIP_700_Bin9	700mSIPHEX2_9_scaffold_1710_c1	700mSIPHEX2	3178790	5024	700mSIPHEX2	7.40234	330280538	37189.4	4.72389e+07	14.8606	4.4994e-08	4.4994
		SIP_700_Bin9	700mSIPHEX2_9_scaffold_926_c1	700mSIPHEX2	3178790	4977	700mSIPHEX2	6.91133	330280538	34397.7	4.72389e+07	14.8606	4.4994e-08	4.4994
		SIP_700_Bin9	700mSIPHEX2_9_scaffold_1741_c1	700mSIPHEX2	3178790	4922	700mSIPHEX2	6.69028	330280538	32929.6	4.72389e+07	14.8606	4.4994e-08	4.4994
		SIP_700_Bin9	700mSIPHEX2_9_scaffold_1765_c1	700mSIPHEX2	3178790	4873	700mSIPHEX2	11.3028	330280538	55078.5	4.72389e+07	14.8606	4.4994e-08	4.4994
		SIP_700_Bin9	700mSIPHEX2_9_scaffold_1878_c1	700mSIPHEX2	3178790	4613	700mSIPHEX2	6.16065	330280538	28419.1	4.72389e+07	14.8606	4.4994e-08	4.4994
		SIP_700_Bin9	700mSIPHEX2_9_scaffold_929_c2	700mSIPHEX2	3178790	4541	700mSIPHEX2	6.3555	330280538	28860.3	4.72389e+07	14.8606	4.4994e-08	4.4994
		SIP_700_Bin9	700mSIPHEX2_9_scaffold_1902_c1	700mSIPHEX2	3178790	4535	700mSIPHEX2	7.86613	330280538	35672.9	4.72389e+07	14.8606	4.4994e-08	4.4994
		SIP_700_Bin9	700mSIPHEX2_9_scaffold_929_c1	700mSIPHEX2	3178790	4462	700mSIPHEX2	7.59439	330280538	33886.2	4.72389e+07	14.8606	4.4994e-08	4.4994
		SIP_700_Bin9	700mSIPHEX2_9_scaffold_2100_c1	700mSIPHEX2	3178790	4112	700mSIPHEX2	5.77587	330280538	23750.4	4.72389e+07	14.8606	4.4994e-08	4.4994
		SIP_700_Bin9	700mSIPHEX2_9_scaffold_926_c2	700mSIPHEX2	3178790	4066	700mSIPHEX2	7.24234	330280538	29447.4	4.72389e+07	14.8606	4.4994e-08	4.4994
		SIP_700_Bin9	700mSIPHEX2_9_scaffold_2183_c2	700mSIPHEX2	3178790	3646	700mSIPHEX2	6.65418	330280538	24261.1	4.72389e+07	14.8606	4.4994e-08	4.4994
		SIP_700_Bin9	700mSIPHEX2_9_scaffold_2487_c1	700mSIPHEX2	3178790	3631	700mSIPHEX2	7.77449	330280538	28229.2	4.72389e+07	14.8606	4.4994e-08	4.4994
		SIP_700_Bin9	700mSIPHEX2_9_scaffold_2107_c1	700mSIPHEX2	3178790	3578	700mSIPHEX2	6.14936	330280538	22002.4	4.72389e+07	14.8606	4.4994e-08	4.4994
		SIP_700_Bin9	700mSIPHEX2_9_scaffold_2594_c1	700mSIPHEX2	3178790	3514	700mSIPHEX2	7.18222	330280538	25238.3	4.72389e+07	14.8606	4.4994e-08	4.4994
		SIP_700_Bin9	700mSIPHEX2_9_scaffold_2642_c1	700mSIPHEX2	3178790	3469	700mSIPHEX2	7.88942	330280538	27368.4	4.72389e+07	14.8606	4.4994e-08	4.4994
		SIP_700_Bin9	700mSIPHEX2_9_scaffold_2677_c1	700mSIPHEX2	3178790	3418	700mSIPHEX2	7.38525	330280538	25242.8	4.72389e+07	14.8606	4.4994e-08	4.4994
		SIP_700_Bin9	700mSIPHEX2_9_scaffold_2714_c1	700mSIPHEX2	3178790	3381	700mSIPHEX2	7.38502	330280538	24968.8	4.72389e+07	14.8606	4.4994e-08	4.4994
		SIP_700_Bin9	700mSIPHEX2_9_scaffold_2889_c1	700mSIPHEX2	3178790	3199	700mSIPHEX2	6.77074	330280538	21659.6	4.72389e+07	14.8606	4.4994e-08	4.4994
		SIP_700_Bin9	700mSIPHEX2_9_scaffold_2939_c1	700mSIPHEX2	3178790	3159	700mSIPHEX2	6.23629	330280538	19700.4	4.72389e+07	14.8606	4.4994e-08	4.4994
		SIP_700_Bin9	700mSIPHEX2_9_scaffold_2959_c1	700mSIPHEX2	3178790	3137	700mSIPHEX2	5.35119	330280538	16786.7	4.72389e+07	14.8606	4.4994e-08	4.4994
		SIP_700_Bin9	700mSIPHEX2_9_scaffold_2969_c1	700mSIPHEX2	3178790	3126	700mSIPHEX2	6.59308	330280538	20610	4.72389e+07	14.8606	4.4994e-08	4.4994
		SIP_700_Bin9	700mSIPHEX2_9_scaffold_2972_c1	700mSIPHEX2	3178790	3123	700mSIPHEX2	6.37403	330280538	19906.1	4.72389e+07	14.8606	4.4994e-08	4.4994
		SIP_700_Bin9	700mSIPHEX2_9_scaffold_2979_c1	700mSIPHEX2	3178790	3117	700mSIPHEX2	7.21975	330280538	22504	4.72389e+07	14.8606	4.4994e-08	4.4994
		SIP_700_Bin23	700mSIPHEX2_23_scaffold_15_c1	700mSIPHEX2	3464572	423242	700mSIPHEX2	13.7917	330280538	5.83723e+06	4.74713e+07	13.7019	4.14858e-08	4.14858
		SIP_700_Bin23	700mSIPHEX2_23_scaffold_36_c1	700mSIPHEX2	3464572	285417	700mSIPHEX2	14.7288	330280538	4.20385e+06	4.74713e+07	13.7019	4.14858e-08	4.14858
		SIP_700_Bin23	700mSIPHEX2_23_scaffold_44_c1	700mSIPHEX2	3464572	252890	700mSIPHEX2	12.3842	330280538	3.13184e+06	4.74713e+07	13.7019	4.14858e-08	4.14858
		SIP_700_Bin23	700mSIPHEX2_23_scaffold_61_c1	700mSIPHEX2	3464572	216430	700mSIPHEX2	16.2822	330280538	3.52396e+06	4.74713e+07	13.7019	4.14858e-08	4.14858
		SIP_700_Bin23	700mSIPHEX2_23_scaffold_63_c1	700mSIPHEX2	3464572	213819	700mSIPHEX2	14.3066	330280538	3.05902e+06	4.74713e+07	13.7019	4.14858e-08	4.14858
		SIP_700_Bin23	700mSIPHEX2_23_scaffold_66_c1	700mSIPHEX2	3464572	198747	700mSIPHEX2	12.5938	330280538	2.50298e+06	4.74713e+07	13.7019	4.14858e-08	4.14858
		SIP_700_Bin23	700mSIPHEX2_23_scaffold_45_c2	700mSIPHEX2	3464572	193606	700mSIPHEX2	14.0313	330280538	2.71654e+06	4.74713e+07	13.7019	4.14858e-08	4.14858
		SIP_700_Bin23	700mSIPHEX2_23_scaffold_37_c2	700mSIPHEX2	3464572	187123	700mSIPHEX2	14.3815	330280538	2.69111e+06	4.74713e+07	13.7019	4.14858e-08	4.14858
		SIP_700_Bin23	700mSIPHEX2_23_scaffold_81_c1	700mSIPHEX2	3464572	164193	700mSIPHEX2	14.6762	330280538	2.40973e+06	4.74713e+07	13.7019	4.14858e-08	4.14858
		SIP_700_Bin23	700mSIPHEX2_23_scaffold_96_c1	700mSIPHEX2	3464572	137240	700mSIPHEX2	12.8885	330280538	1.76882e+06	4.74713e+07	13.7019	4.14858e-08	4.14858
		SIP_700_Bin23	700mSIPHEX2_23_scaffold_43_c3	700mSIPHEX2	3464572	110239	700mSIPHEX2	13.5529	330280538	1.49406e+06	4.74713e+07	13.7019	4.14858e-08	4.14858
		SIP_700_Bin23	700mSIPHEX2_23_scaffold_130_c1	700mSIPHEX2	3464572	105905	700mSIPHEX2	12.7259	330280538	1.34774e+06	4.74713e+07	13.7019	4.14858e-08	4.14858
		SIP_700_Bin23	700mSIPHEX2_23_scaffold_136_c1	700mSIPHEX2	3464572	98486	700mSIPHEX2	12.8608	330280538	1.26661e+06	4.74713e+07	13.7019	4.14858e-08	4.14858
		SIP_700_Bin23	700mSIPHEX2_23_scaffold_37_c1	700mSIPHEX2	3464572	95906	700mSIPHEX2	15.5961	330280538	1.49576e+06	4.74713e+07	13.7019	4.14858e-08	4.14858
		SIP_700_Bin23	700mSIPHEX2_23_scaffold_140_c1	700mSIPHEX2	3464572	95830	700mSIPHEX2	11.9005	330280538	1.14042e+06	4.74713e+07	13.7019	4.14858e-08	4.14858
		SIP_700_Bin23	700mSIPHEX2_23_scaffold_168_c1	700mSIPHEX2	3464572	78403	700mSIPHEX2	12.2062	330280538	957003	4.74713e+07	13.7019	4.14858e-08	4.14858
		SIP_700_Bin23	700mSIPHEX2_23_scaffold_183_c1	700mSIPHEX2	3464572	69241	700mSIPHEX2	14.4343	330280538	999445	4.74713e+07	13.7019	4.14858e-08	4.14858
		SIP_700_Bin23	700mSIPHEX2_23_scaffold_43_c4	700mSIPHEX2	3464572	65304	700mSIPHEX2	12.7983	330280538	835780	4.74713e+07	13.7019	4.14858e-08	4.14858
		SIP_700_Bin23	700mSIPHEX2_23_scaffold_45_c1	700mSIPHEX2	3464572	57548	700mSIPHEX2	13.9954	330280538	805407	4.74713e+07	13.7019	4.14858e-08	4.14858
		SIP_700_Bin23	700mSIPHEX2_23_scaffold_230_c1	700mSIPHEX2	3464572	55626	700mSIPHEX2	11.5228	330280538	640967	4.74713e+07	13.7019	4.14858e-08	4.14858
		SIP_700_Bin23	700mSIPHEX2_23_scaffold_43_c1	700mSIPHEX2	3464572	44945	700mSIPHEX2	11.3708	330280538	511061	4.74713e+07	13.7019	4.14858e-08	4.14858
		SIP_700_Bin23	700mSIPHEX2_23_scaffold_43_c2	700mSIPHEX2	3464572	42742	700mSIPHEX2	12.0616	330280538	515537	4.74713e+07	13.7019	4.14858e-08	4.14858
		SIP_700_Bin23	700mSIPHEX2_23_scaffold_303_c1	700mSIPHEX2	3464572	36652	700mSIPHEX2	12.7112	330280538	465891	4.74713e+07	13.7019	4.14858e-08	4.14858
		SIP_700_Bin23	700mSIPHEX2_23_scaffold_324_c1	700mSIPHEX2	3464572	32468	700mSIPHEX2	13.144	330280538	426759	4.74713e+07	13.7019	4.14858e-08	4.14858
		SIP_700_Bin23	700mSIPHEX2_23_scaffold_335_c1	700mSIPHEX2	3464572	31827	700mSIPHEX2	13.225	330280538	420912	4.74713e+07	13.7019	4.14858e-08	4.14858
		SIP_700_Bin23	700mSIPHEX2_23_scaffold_15_c2	700mSIPHEX2	3464572	30776	700mSIPHEX2	12.7199	330280538	391468	4.74713e+07	13.7019	4.14858e-08	4.14858
		SIP_700_Bin23	700mSIPHEX2_23_scaffold_358_c1	700mSIPHEX2	3464572	29644	700mSIPHEX2	15.6193	330280538	463019	4.74713e+07	13.7019	4.14858e-08	4.14858
		SIP_700_Bin23	700mSIPHEX2_23_scaffold_404_c1	700mSIPHEX2	3464572	24563	700mSIPHEX2	13.5605	330280538	333087	4.74713e+07	13.7019	4.14858e-08	4.14858
		SIP_700_Bin23	700mSIPHEX2_23_scaffold_423_c1	700mSIPHEX2	3464572	22870	700mSIPHEX2	13.4371	330280538	307306	4.74713e+07	13.7019	4.14858e-08	4.14858
		SIP_700_Bin23	700mSIPHEX2_23_scaffold_500_c1	700mSIPHEX2	3464572	18018	700mSIPHEX2	11.9898	330280538	216032	4.74713e+07	13.7019	4.14858e-08	4.14858
		SIP_700_Bin23	700mSIPHEX2_23_scaffold_551_c1	700mSIPHEX2	3464572	15927	700mSIPHEX2	13.5036	330280538	215072	4.74713e+07	13.7019	4.14858e-08	4.14858
		SIP_700_Bin23	700mSIPHEX2_23_scaffold_711_c1	700mSIPHEX2	3464572	12098	700mSIPHEX2	13.2929	330280538	160818	4.74713e+07	13.7019	4.14858e-08	4.14858
		SIP_700_Bin23	700mSIPHEX2_23_scaffold_1222_c1	700mSIPHEX2	3464572	6819	700mSIPHEX2	13.9196	330280538	94917.8	4.74713e+07	13.7019	4.14858e-08	4.14858
		SIP_700_Bin23	700mSIPHEX2_23_scaffold_1229_c1	700mSIPHEX2	3464572	6794	700mSIPHEX2	11.8752	330280538	80680.1	4.74713e+07	13.7019	4.14858e-08	4.14858
		SIP_700_Bin23	700mSIPHEX2_23_scaffold_2856_c1	700mSIPHEX2	3464572	3234	700mSIPHEX2	12.5292	330280538	40519.4	4.74713e+07	13.7019	4.14858e-08	4.14858
		SIP_700_Bin13	700mSIPHEX2_13_scaffold_20_c1	700mSIPHEX2	4051957	417036	700mSIPHEX2	90.086	330280538	3.75691e+07	3.52647e+08	87.0313	2.63507e-07	26.3507
		SIP_700_Bin13	700mSIPHEX2_13_scaffold_24_c1	700mSIPHEX2	4051957	384978	700mSIPHEX2	88.5438	330280538	3.40874e+07	3.52647e+08	87.0313	2.63507e-07	26.3507
		SIP_700_Bin13	700mSIPHEX2_13_scaffold_32_c1	700mSIPHEX2	4051957	308059	700mSIPHEX2	85.5616	330280538	2.6358e+07	3.52647e+08	87.0313	2.63507e-07	26.3507
		SIP_700_Bin13	700mSIPHEX2_13_scaffold_48_c1	700mSIPHEX2	4051957	245945	700mSIPHEX2	82.5561	330280538	2.03043e+07	3.52647e+08	87.0313	2.63507e-07	26.3507
		SIP_700_Bin13	700mSIPHEX2_13_scaffold_51_c1	700mSIPHEX2	4051957	237781	700mSIPHEX2	85.4669	330280538	2.03224e+07	3.52647e+08	87.0313	2.63507e-07	26.3507
		SIP_700_Bin13	700mSIPHEX2_13_scaffold_60_c1	700mSIPHEX2	4051957	217571	700mSIPHEX2	82.3587	330280538	1.79189e+07	3.52647e+08	87.0313	2.63507e-07	26.3507
		SIP_700_Bin13	700mSIPHEX2_13_scaffold_71_c1	700mSIPHEX2	4051957	190704	700mSIPHEX2	86.1751	330280538	1.64339e+07	3.52647e+08	87.0313	2.63507e-07	26.3507
		SIP_700_Bin13	700mSIPHEX2_13_scaffold_83_c1	700mSIPHEX2	4051957	163342	700mSIPHEX2	83.7902	330280538	1.36865e+07	3.52647e+08	87.0313	2.63507e-07	26.3507
		SIP_700_Bin13	700mSIPHEX2_13_scaffold_85_c1	700mSIPHEX2	4051957	162465	700mSIPHEX2	85.3335	330280538	1.38637e+07	3.52647e+08	87.0313	2.63507e-07	26.3507
		SIP_700_Bin13	700mSIPHEX2_13_scaffold_89_c1	700mSIPHEX2	4051957	155931	700mSIPHEX2	85.8099	330280538	1.33804e+07	3.52647e+08	87.0313	2.63507e-07	26.3507
		SIP_700_Bin13	700mSIPHEX2_13_scaffold_92_c1	700mSIPHEX2	4051957	143343	700mSIPHEX2	86.3091	330280538	1.23718e+07	3.52647e+08	87.0313	2.63507e-07	26.3507
		SIP_700_Bin13	700mSIPHEX2_13_scaffold_105_c1	700mSIPHEX2	4051957	126551	700mSIPHEX2	88.6486	330280538	1.12186e+07	3.52647e+08	87.0313	2.63507e-07	26.3507
		SIP_700_Bin13	700mSIPHEX2_13_scaffold_107_c1	700mSIPHEX2	4051957	123702	700mSIPHEX2	82.6592	330280538	1.02251e+07	3.52647e+08	87.0313	2.63507e-07	26.3507
		SIP_700_Bin13	700mSIPHEX2_13_scaffold_111_c1	700mSIPHEX2	4051957	121163	700mSIPHEX2	84.883	330280538	1.02847e+07	3.52647e+08	87.0313	2.63507e-07	26.3507
		SIP_700_Bin13	700mSIPHEX2_13_scaffold_141_c1	700mSIPHEX2	4051957	95810	700mSIPHEX2	94.7473	330280538	9.07774e+06	3.52647e+08	87.0313	2.63507e-07	26.3507
		SIP_700_Bin13	700mSIPHEX2_13_scaffold_150_c1	700mSIPHEX2	4051957	87134	700mSIPHEX2	82.1998	330280538	7.1624e+06	3.52647e+08	87.0313	2.63507e-07	26.3507
		SIP_700_Bin13	700mSIPHEX2_13_scaffold_154_c1	700mSIPHEX2	4051957	85621	700mSIPHEX2	102.149	330280538	8.7461e+06	3.52647e+08	87.0313	2.63507e-07	26.3507
		SIP_700_Bin13	700mSIPHEX2_13_scaffold_160_c1	700mSIPHEX2	4051957	82955	700mSIPHEX2	89.7834	330280538	7.44798e+06	3.52647e+08	87.0313	2.63507e-07	26.3507
		SIP_700_Bin13	700mSIPHEX2_13_scaffold_189_c1	700mSIPHEX2	4051957	67598	700mSIPHEX2	89.4436	330280538	6.04621e+06	3.52647e+08	87.0313	2.63507e-07	26.3507
		SIP_700_Bin13	700mSIPHEX2_13_scaffold_190_c1	700mSIPHEX2	4051957	67516	700mSIPHEX2	86.2483	330280538	5.82314e+06	3.52647e+08	87.0313	2.63507e-07	26.3507
		SIP_700_Bin13	700mSIPHEX2_13_scaffold_196_c1	700mSIPHEX2	4051957	64595	700mSIPHEX2	85.2924	330280538	5.50946e+06	3.52647e+08	87.0313	2.63507e-07	26.3507
		SIP_700_Bin13	700mSIPHEX2_13_scaffold_251_c1	700mSIPHEX2	4051957	47786	700mSIPHEX2	86.3442	330280538	4.12604e+06	3.52647e+08	87.0313	2.63507e-07	26.3507
		SIP_700_Bin13	700mSIPHEX2_13_scaffold_261_c1	700mSIPHEX2	4051957	44893	700mSIPHEX2	83.6694	330280538	3.75617e+06	3.52647e+08	87.0313	2.63507e-07	26.3507
		SIP_700_Bin13	700mSIPHEX2_13_scaffold_269_c1	700mSIPHEX2	4051957	43077	700mSIPHEX2	88.4613	330280538	3.81065e+06	3.52647e+08	87.0313	2.63507e-07	26.3507
		SIP_700_Bin13	700mSIPHEX2_13_scaffold_278_c1	700mSIPHEX2	4051957	41582	700mSIPHEX2	78.5631	330280538	3.26681e+06	3.52647e+08	87.0313	2.63507e-07	26.3507
		SIP_700_Bin13	700mSIPHEX2_13_scaffold_296_c1	700mSIPHEX2	4051957	37776	700mSIPHEX2	99.7348	330280538	3.76758e+06	3.52647e+08	87.0313	2.63507e-07	26.3507
		SIP_700_Bin13	700mSIPHEX2_13_scaffold_328_c1	700mSIPHEX2	4051957	32420	700mSIPHEX2	88.256	330280538	2.86126e+06	3.52647e+08	87.0313	2.63507e-07	26.3507
		SIP_700_Bin13	700mSIPHEX2_13_scaffold_361_c1	700mSIPHEX2	4051957	29049	700mSIPHEX2	88.2686	330280538	2.56411e+06	3.52647e+08	87.0313	2.63507e-07	26.3507
		SIP_700_Bin13	700mSIPHEX2_13_scaffold_370_c1	700mSIPHEX2	4051957	27907	700mSIPHEX2	94.2402	330280538	2.62996e+06	3.52647e+08	87.0313	2.63507e-07	26.3507
		SIP_700_Bin13	700mSIPHEX2_13_scaffold_392_c1	700mSIPHEX2	4051957	25642	700mSIPHEX2	90.9291	330280538	2.3316e+06	3.52647e+08	87.0313	2.63507e-07	26.3507
		SIP_700_Bin13	700mSIPHEX2_13_scaffold_444_c1	700mSIPHEX2	4051957	21477	700mSIPHEX2	83.9891	330280538	1.80383e+06	3.52647e+08	87.0313	2.63507e-07	26.3507
		SIP_700_Bin13	700mSIPHEX2_13_scaffold_479_c1	700mSIPHEX2	4051957	19298	700mSIPHEX2	128.286	330280538	2.47566e+06	3.52647e+08	87.0313	2.63507e-07	26.3507
		SIP_700_Bin13	700mSIPHEX2_13_scaffold_485_c1	700mSIPHEX2	4051957	18945	700mSIPHEX2	86.2076	330280538	1.6332e+06	3.52647e+08	87.0313	2.63507e-07	26.3507
		SIP_700_Bin13	700mSIPHEX2_13_scaffold_566_c1	700mSIPHEX2	4051957	15364	700mSIPHEX2	88.7119	330280538	1.36297e+06	3.52647e+08	87.0313	2.63507e-07	26.3507
		SIP_700_Bin13	700mSIPHEX2_13_scaffold_597_c1	700mSIPHEX2	4051957	14772	700mSIPHEX2	88.8423	330280538	1.31238e+06	3.52647e+08	87.0313	2.63507e-07	26.3507
		SIP_700_Bin13	700mSIPHEX2_13_scaffold_601_c1	700mSIPHEX2	4051957	14702	700mSIPHEX2	96.2044	330280538	1.4144e+06	3.52647e+08	87.0313	2.63507e-07	26.3507
		SIP_700_Bin13	700mSIPHEX2_13_scaffold_715_c1	700mSIPHEX2	4051957	11960	700mSIPHEX2	79.8238	330280538	954693	3.52647e+08	87.0313	2.63507e-07	26.3507
		SIP_700_Bin13	700mSIPHEX2_13_scaffold_934_c1	700mSIPHEX2	4051957	8986	700mSIPHEX2	82.461	330280538	740995	3.52647e+08	87.0313	2.63507e-07	26.3507
		SIP_700_Bin13	700mSIPHEX2_13_scaffold_1061_c1	700mSIPHEX2	4051957	7894	700mSIPHEX2	80.5174	330280538	635604	3.52647e+08	87.0313	2.63507e-07	26.3507
		SIP_700_Bin13	700mSIPHEX2_13_scaffold_1096_c1	700mSIPHEX2	4051957	7634	700mSIPHEX2	90.384	330280538	689991	3.52647e+08	87.0313	2.63507e-07	26.3507
		SIP_700_Bin13	700mSIPHEX2_13_scaffold_1136_c1	700mSIPHEX2	4051957	7397	700mSIPHEX2	77.3967	330280538	572503	3.52647e+08	87.0313	2.63507e-07	26.3507
		SIP_700_Bin13	700mSIPHEX2_13_scaffold_1362_c1	700mSIPHEX2	4051957	6121	700mSIPHEX2	90.0735	330280538	551340	3.52647e+08	87.0313	2.63507e-07	26.3507
		SIP_700_Bin13	700mSIPHEX2_13_scaffold_1553_c1	700mSIPHEX2	4051957	5475	700mSIPHEX2	88.5054	330280538	484567	3.52647e+08	87.0313	2.63507e-07	26.3507
		SIP_700_Bin13	700mSIPHEX2_13_scaffold_1759_c1	700mSIPHEX2	4051957	4892	700mSIPHEX2	86.4779	330280538	423050	3.52647e+08	87.0313	2.63507e-07	26.3507
		SIP_700_Bin13	700mSIPHEX2_13_scaffold_1763_c1	700mSIPHEX2	4051957	4877	700mSIPHEX2	89.6351	330280538	437150	3.52647e+08	87.0313	2.63507e-07	26.3507
		SIP_700_Bin13	700mSIPHEX2_13_scaffold_4366_c1	700mSIPHEX2	4051957	2231	700mSIPHEX2	90.8357	330280538	202654	3.52647e+08	87.0313	2.63507e-07	26.3507
		SIP_700_Bin16	700mSIPHEX2_16_scaffold_25_c1	700mSIPHEX2	4292674	363118	700mSIPHEX2	191.634	330280538	6.95858e+07	8.61558e+08	200.704	6.07678e-07	60.7678
		SIP_700_Bin16	700mSIPHEX2_16_scaffold_27_c1	700mSIPHEX2	4292674	332917	700mSIPHEX2	200.263	330280538	6.6671e+07	8.61558e+08	200.704	6.07678e-07	60.7678
		SIP_700_Bin16	700mSIPHEX2_16_scaffold_28_c1	700mSIPHEX2	4292674	326890	700mSIPHEX2	197.513	330280538	6.4565e+07	8.61558e+08	200.704	6.07678e-07	60.7678
		SIP_700_Bin16	700mSIPHEX2_16_scaffold_56_c1	700mSIPHEX2	4292674	229929	700mSIPHEX2	207.481	330280538	4.77059e+07	8.61558e+08	200.704	6.07678e-07	60.7678
		SIP_700_Bin16	700mSIPHEX2_16_scaffold_59_c1	700mSIPHEX2	4292674	219479	700mSIPHEX2	202.293	330280538	4.43991e+07	8.61558e+08	200.704	6.07678e-07	60.7678
		SIP_700_Bin16	700mSIPHEX2_16_scaffold_62_c1	700mSIPHEX2	4292674	213903	700mSIPHEX2	194.734	330280538	4.16542e+07	8.61558e+08	200.704	6.07678e-07	60.7678
		SIP_700_Bin16	700mSIPHEX2_16_scaffold_22_c1	700mSIPHEX2	4292674	206811	700mSIPHEX2	203.551	330280538	4.20966e+07	8.61558e+08	200.704	6.07678e-07	60.7678
		SIP_700_Bin16	700mSIPHEX2_16_scaffold_22_c2	700mSIPHEX2	4292674	202706	700mSIPHEX2	201.434	330280538	4.08319e+07	8.61558e+08	200.704	6.07678e-07	60.7678
		SIP_700_Bin16	700mSIPHEX2_16_scaffold_67_c1	700mSIPHEX2	4292674	194256	700mSIPHEX2	210.951	330280538	4.09785e+07	8.61558e+08	200.704	6.07678e-07	60.7678
		SIP_700_Bin16	700mSIPHEX2_16_scaffold_91_c1	700mSIPHEX2	4292674	143841	700mSIPHEX2	204.193	330280538	2.93713e+07	8.61558e+08	200.704	6.07678e-07	60.7678
		SIP_700_Bin16	700mSIPHEX2_16_scaffold_94_c1	700mSIPHEX2	4292674	142338	700mSIPHEX2	202.143	330280538	2.87726e+07	8.61558e+08	200.704	6.07678e-07	60.7678
		SIP_700_Bin16	700mSIPHEX2_16_scaffold_101_c1	700mSIPHEX2	4292674	129603	700mSIPHEX2	204.822	330280538	2.65455e+07	8.61558e+08	200.704	6.07678e-07	60.7678
		SIP_700_Bin16	700mSIPHEX2_16_scaffold_103_c1	700mSIPHEX2	4292674	127452	700mSIPHEX2	196.21	330280538	2.50074e+07	8.61558e+08	200.704	6.07678e-07	60.7678
		SIP_700_Bin16	700mSIPHEX2_16_scaffold_104_c1	700mSIPHEX2	4292674	126680	700mSIPHEX2	198.965	330280538	2.52049e+07	8.61558e+08	200.704	6.07678e-07	60.7678
		SIP_700_Bin16	700mSIPHEX2_16_scaffold_117_c1	700mSIPHEX2	4292674	116493	700mSIPHEX2	208.958	330280538	2.43421e+07	8.61558e+08	200.704	6.07678e-07	60.7678
		SIP_700_Bin16	700mSIPHEX2_16_scaffold_128_c1	700mSIPHEX2	4292674	106452	700mSIPHEX2	195.648	330280538	2.08271e+07	8.61558e+08	200.704	6.07678e-07	60.7678
		SIP_700_Bin16	700mSIPHEX2_16_scaffold_142_c1	700mSIPHEX2	4292674	94564	700mSIPHEX2	194.902	330280538	1.84307e+07	8.61558e+08	200.704	6.07678e-07	60.7678
		SIP_700_Bin16	700mSIPHEX2_16_scaffold_146_c1	700mSIPHEX2	4292674	88633	700mSIPHEX2	203.749	330280538	1.80589e+07	8.61558e+08	200.704	6.07678e-07	60.7678
		SIP_700_Bin16	700mSIPHEX2_16_scaffold_152_c1	700mSIPHEX2	4292674	86199	700mSIPHEX2	186.51	330280538	1.6077e+07	8.61558e+08	200.704	6.07678e-07	60.7678
		SIP_700_Bin16	700mSIPHEX2_16_scaffold_165_c1	700mSIPHEX2	4292674	80919	700mSIPHEX2	196.194	330280538	1.58758e+07	8.61558e+08	200.704	6.07678e-07	60.7678
		SIP_700_Bin16	700mSIPHEX2_16_scaffold_167_c1	700mSIPHEX2	4292674	79011	700mSIPHEX2	208.533	330280538	1.64764e+07	8.61558e+08	200.704	6.07678e-07	60.7678
		SIP_700_Bin16	700mSIPHEX2_16_scaffold_169_c1	700mSIPHEX2	4292674	77470	700mSIPHEX2	192.507	330280538	1.49135e+07	8.61558e+08	200.704	6.07678e-07	60.7678
		SIP_700_Bin16	700mSIPHEX2_16_scaffold_172_c1	700mSIPHEX2	4292674	73963	700mSIPHEX2	205.114	330280538	1.51708e+07	8.61558e+08	200.704	6.07678e-07	60.7678
		SIP_700_Bin16	700mSIPHEX2_16_scaffold_180_c1	700mSIPHEX2	4292674	70091	700mSIPHEX2	210.518	330280538	1.47554e+07	8.61558e+08	200.704	6.07678e-07	60.7678
		SIP_700_Bin16	700mSIPHEX2_16_scaffold_206_c1	700mSIPHEX2	4292674	59975	700mSIPHEX2	201.427	330280538	1.20806e+07	8.61558e+08	200.704	6.07678e-07	60.7678
		SIP_700_Bin16	700mSIPHEX2_16_scaffold_218_c1	700mSIPHEX2	4292674	57912	700mSIPHEX2	184.784	330280538	1.07012e+07	8.61558e+08	200.704	6.07678e-07	60.7678
		SIP_700_Bin16	700mSIPHEX2_16_scaffold_249_c1	700mSIPHEX2	4292674	48066	700mSIPHEX2	190.685	330280538	9.16547e+06	8.61558e+08	200.704	6.07678e-07	60.7678
		SIP_700_Bin16	700mSIPHEX2_16_scaffold_253_c1	700mSIPHEX2	4292674	47207	700mSIPHEX2	201.886	330280538	9.53043e+06	8.61558e+08	200.704	6.07678e-07	60.7678
		SIP_700_Bin16	700mSIPHEX2_16_scaffold_259_c1	700mSIPHEX2	4292674	45358	700mSIPHEX2	232.242	330280538	1.0534e+07	8.61558e+08	200.704	6.07678e-07	60.7678
		SIP_700_Bin16	700mSIPHEX2_16_scaffold_262_c1	700mSIPHEX2	4292674	44711	700mSIPHEX2	206.645	330280538	9.2393e+06	8.61558e+08	200.704	6.07678e-07	60.7678
		SIP_700_Bin16	700mSIPHEX2_16_scaffold_301_c1	700mSIPHEX2	4292674	36991	700mSIPHEX2	208.887	330280538	7.72694e+06	8.61558e+08	200.704	6.07678e-07	60.7678
		SIP_700_Bin16	700mSIPHEX2_16_scaffold_376_c1	700mSIPHEX2	4292674	27302	700mSIPHEX2	191.729	330280538	5.23459e+06	8.61558e+08	200.704	6.07678e-07	60.7678
		SIP_700_Bin16	700mSIPHEX2_16_scaffold_385_c1	700mSIPHEX2	4292674	26294	700mSIPHEX2	199.622	330280538	5.24886e+06	8.61558e+08	200.704	6.07678e-07	60.7678
		SIP_700_Bin16	700mSIPHEX2_16_scaffold_554_c1	700mSIPHEX2	4292674	15895	700mSIPHEX2	200.993	330280538	3.19478e+06	8.61558e+08	200.704	6.07678e-07	60.7678
		SIP_700_Bin16	700mSIPHEX2_16_scaffold_611_c1	700mSIPHEX2	4292674	14464	700mSIPHEX2	205.81	330280538	2.97684e+06	8.61558e+08	200.704	6.07678e-07	60.7678
		SIP_700_Bin16	700mSIPHEX2_16_scaffold_1040_c1	700mSIPHEX2	4292674	8089	700mSIPHEX2	187.293	330280538	1.51501e+06	8.61558e+08	200.704	6.07678e-07	60.7678
		SIP_700_Bin16	700mSIPHEX2_16_scaffold_1060_c1	700mSIPHEX2	4292674	7895	700mSIPHEX2	266.541	330280538	2.10434e+06	8.61558e+08	200.704	6.07678e-07	60.7678
		SIP_700_Bin16	700mSIPHEX2_16_scaffold_1679_c1	700mSIPHEX2	4292674	5093	700mSIPHEX2	201.76	330280538	1.02756e+06	8.61558e+08	200.704	6.07678e-07	60.7678
		SIP_700_Bin16	700mSIPHEX2_16_scaffold_1989_c1	700mSIPHEX2	4292674	4350	700mSIPHEX2	219.583	330280538	955186	8.61558e+08	200.704	6.07678e-07	60.7678
		SIP_700_Bin16	700mSIPHEX2_16_scaffold_2812_c1	700mSIPHEX2	4292674	3275	700mSIPHEX2	224.228	330280538	734347	8.61558e+08	200.704	6.07678e-07	60.7678
		SIP_700_Bin16	700mSIPHEX2_16_scaffold_2833_c1	700mSIPHEX2	4292674	3255	700mSIPHEX2	213.214	330280538	694012	8.61558e+08	200.704	6.07678e-07	60.7678
		SIP_700_Bin16	700mSIPHEX2_16_scaffold_3350_c1	700mSIPHEX2	4292674	2824	700mSIPHEX2	204.49	330280538	577480	8.61558e+08	200.704	6.07678e-07	60.7678
		SIP_700_Bin22	700mSIPHEX2_22_scaffold_49_c1	700mSIPHEX2	3975403	245266	700mSIPHEX2	26.2149	330280538	6.42962e+06	1.09441e+08	27.5296	8.3352e-08	8.3352
		SIP_700_Bin22	700mSIPHEX2_22_scaffold_58_c1	700mSIPHEX2	3975403	225110	700mSIPHEX2	27.3507	330280538	6.15692e+06	1.09441e+08	27.5296	8.3352e-08	8.3352
		SIP_700_Bin22	700mSIPHEX2_22_scaffold_86_c1	700mSIPHEX2	3975403	160451	700mSIPHEX2	28.0805	330280538	4.50554e+06	1.09441e+08	27.5296	8.3352e-08	8.3352
		SIP_700_Bin22	700mSIPHEX2_22_scaffold_119_c1	700mSIPHEX2	3975403	113087	700mSIPHEX2	28.718	330280538	3.24763e+06	1.09441e+08	27.5296	8.3352e-08	8.3352
		SIP_700_Bin22	700mSIPHEX2_22_scaffold_120_c1	700mSIPHEX2	3975403	112002	700mSIPHEX2	29.236	330280538	3.27449e+06	1.09441e+08	27.5296	8.3352e-08	8.3352
		SIP_700_Bin22	700mSIPHEX2_22_scaffold_143_c1	700mSIPHEX2	3975403	92575	700mSIPHEX2	25.0163	330280538	2.31588e+06	1.09441e+08	27.5296	8.3352e-08	8.3352
		SIP_700_Bin22	700mSIPHEX2_22_scaffold_148_c1	700mSIPHEX2	3975403	87293	700mSIPHEX2	28.4171	330280538	2.48061e+06	1.09441e+08	27.5296	8.3352e-08	8.3352
		SIP_700_Bin22	700mSIPHEX2_22_scaffold_149_c1	700mSIPHEX2	3975403	87182	700mSIPHEX2	27.7724	330280538	2.42125e+06	1.09441e+08	27.5296	8.3352e-08	8.3352
		SIP_700_Bin22	700mSIPHEX2_22_scaffold_156_c1	700mSIPHEX2	3975403	84551	700mSIPHEX2	26.3715	330280538	2.22974e+06	1.09441e+08	27.5296	8.3352e-08	8.3352
		SIP_700_Bin22	700mSIPHEX2_22_scaffold_161_c1	700mSIPHEX2	3975403	82733	700mSIPHEX2	23.4795	330280538	1.94253e+06	1.09441e+08	27.5296	8.3352e-08	8.3352
		SIP_700_Bin22	700mSIPHEX2_22_scaffold_162_c1	700mSIPHEX2	3975403	82153	700mSIPHEX2	28.4947	330280538	2.34093e+06	1.09441e+08	27.5296	8.3352e-08	8.3352
		SIP_700_Bin22	700mSIPHEX2_22_scaffold_184_c1	700mSIPHEX2	3975403	68917	700mSIPHEX2	25.8229	330280538	1.77964e+06	1.09441e+08	27.5296	8.3352e-08	8.3352
		SIP_700_Bin22	700mSIPHEX2_22_scaffold_187_c1	700mSIPHEX2	3975403	68275	700mSIPHEX2	26.4961	330280538	1.80902e+06	1.09441e+08	27.5296	8.3352e-08	8.3352
		SIP_700_Bin22	700mSIPHEX2_22_scaffold_193_c1	700mSIPHEX2	3975403	66535	700mSIPHEX2	29.0951	330280538	1.93584e+06	1.09441e+08	27.5296	8.3352e-08	8.3352
		SIP_700_Bin22	700mSIPHEX2_22_scaffold_204_c1	700mSIPHEX2	3975403	60874	700mSIPHEX2	25.5111	330280538	1.55296e+06	1.09441e+08	27.5296	8.3352e-08	8.3352
		SIP_700_Bin22	700mSIPHEX2_22_scaffold_209_c1	700mSIPHEX2	3975403	59240	700mSIPHEX2	28.3263	330280538	1.67805e+06	1.09441e+08	27.5296	8.3352e-08	8.3352
		SIP_700_Bin22	700mSIPHEX2_22_scaffold_214_c1	700mSIPHEX2	3975403	58741	700mSIPHEX2	27.2398	330280538	1.60009e+06	1.09441e+08	27.5296	8.3352e-08	8.3352
		SIP_700_Bin22	700mSIPHEX2_22_scaffold_215_c1	700mSIPHEX2	3975403	58666	700mSIPHEX2	30.2935	330280538	1.7772e+06	1.09441e+08	27.5296	8.3352e-08	8.3352
		SIP_700_Bin22	700mSIPHEX2_22_scaffold_219_c1	700mSIPHEX2	3975403	57829	700mSIPHEX2	30.3355	330280538	1.75427e+06	1.09441e+08	27.5296	8.3352e-08	8.3352
		SIP_700_Bin22	700mSIPHEX2_22_scaffold_220_c1	700mSIPHEX2	3975403	57604	700mSIPHEX2	28.096	330280538	1.61844e+06	1.09441e+08	27.5296	8.3352e-08	8.3352
		SIP_700_Bin22	700mSIPHEX2_22_scaffold_225_c1	700mSIPHEX2	3975403	56163	700mSIPHEX2	25.8615	330280538	1.45246e+06	1.09441e+08	27.5296	8.3352e-08	8.3352
		SIP_700_Bin22	700mSIPHEX2_22_scaffold_226_c1	700mSIPHEX2	3975403	56111	700mSIPHEX2	30.2646	330280538	1.69818e+06	1.09441e+08	27.5296	8.3352e-08	8.3352
		SIP_700_Bin22	700mSIPHEX2_22_scaffold_227_c1	700mSIPHEX2	3975403	56093	700mSIPHEX2	27.5709	330280538	1.54653e+06	1.09441e+08	27.5296	8.3352e-08	8.3352
		SIP_700_Bin22	700mSIPHEX2_22_scaffold_228_c1	700mSIPHEX2	3975403	55946	700mSIPHEX2	28.3029	330280538	1.58343e+06	1.09441e+08	27.5296	8.3352e-08	8.3352
		SIP_700_Bin22	700mSIPHEX2_22_scaffold_234_c1	700mSIPHEX2	3975403	52602	700mSIPHEX2	25.6952	330280538	1.35162e+06	1.09441e+08	27.5296	8.3352e-08	8.3352
		SIP_700_Bin22	700mSIPHEX2_22_scaffold_239_c1	700mSIPHEX2	3975403	51582	700mSIPHEX2	27.4688	330280538	1.4169e+06	1.09441e+08	27.5296	8.3352e-08	8.3352
		SIP_700_Bin22	700mSIPHEX2_22_scaffold_243_c1	700mSIPHEX2	3975403	49529	700mSIPHEX2	27.0162	330280538	1.33809e+06	1.09441e+08	27.5296	8.3352e-08	8.3352
		SIP_700_Bin22	700mSIPHEX2_22_scaffold_254_c1	700mSIPHEX2	3975403	47000	700mSIPHEX2	26.7066	330280538	1.25521e+06	1.09441e+08	27.5296	8.3352e-08	8.3352
		SIP_700_Bin22	700mSIPHEX2_22_scaffold_260_c1	700mSIPHEX2	3975403	45335	700mSIPHEX2	26.4892	330280538	1.20089e+06	1.09441e+08	27.5296	8.3352e-08	8.3352
		SIP_700_Bin22	700mSIPHEX2_22_scaffold_272_c1	700mSIPHEX2	3975403	42453	700mSIPHEX2	25.8416	330280538	1.09705e+06	1.09441e+08	27.5296	8.3352e-08	8.3352
		SIP_700_Bin22	700mSIPHEX2_22_scaffold_273_c1	700mSIPHEX2	3975403	42434	700mSIPHEX2	26.5223	330280538	1.12545e+06	1.09441e+08	27.5296	8.3352e-08	8.3352
		SIP_700_Bin22	700mSIPHEX2_22_scaffold_276_c1	700mSIPHEX2	3975403	41960	700mSIPHEX2	30.8179	330280538	1.29312e+06	1.09441e+08	27.5296	8.3352e-08	8.3352
		SIP_700_Bin22	700mSIPHEX2_22_scaffold_277_c1	700mSIPHEX2	3975403	41829	700mSIPHEX2	26.6766	330280538	1.11586e+06	1.09441e+08	27.5296	8.3352e-08	8.3352
		SIP_700_Bin22	700mSIPHEX2_22_scaffold_282_c1	700mSIPHEX2	3975403	41150	700mSIPHEX2	27.8837	330280538	1.14741e+06	1.09441e+08	27.5296	8.3352e-08	8.3352
		SIP_700_Bin22	700mSIPHEX2_22_scaffold_297_c1	700mSIPHEX2	3975403	37109	700mSIPHEX2	27.4084	330280538	1.0171e+06	1.09441e+08	27.5296	8.3352e-08	8.3352
		SIP_700_Bin22	700mSIPHEX2_22_scaffold_304_c1	700mSIPHEX2	3975403	36479	700mSIPHEX2	26.5123	330280538	967142	1.09441e+08	27.5296	8.3352e-08	8.3352
		SIP_700_Bin22	700mSIPHEX2_22_scaffold_307_c1	700mSIPHEX2	3975403	36315	700mSIPHEX2	28.8392	330280538	1.0473e+06	1.09441e+08	27.5296	8.3352e-08	8.3352
		SIP_700_Bin22	700mSIPHEX2_22_scaffold_309_c1	700mSIPHEX2	3975403	36124	700mSIPHEX2	24.8785	330280538	898711	1.09441e+08	27.5296	8.3352e-08	8.3352
		SIP_700_Bin22	700mSIPHEX2_22_scaffold_312_c1	700mSIPHEX2	3975403	35685	700mSIPHEX2	28.5543	330280538	1.01896e+06	1.09441e+08	27.5296	8.3352e-08	8.3352
		SIP_700_Bin22	700mSIPHEX2_22_scaffold_314_c1	700mSIPHEX2	3975403	35434	700mSIPHEX2	25.928	330280538	918733	1.09441e+08	27.5296	8.3352e-08	8.3352
		SIP_700_Bin22	700mSIPHEX2_22_scaffold_316_c1	700mSIPHEX2	3975403	35349	700mSIPHEX2	26.8694	330280538	949806	1.09441e+08	27.5296	8.3352e-08	8.3352
		SIP_700_Bin22	700mSIPHEX2_22_scaffold_322_c1	700mSIPHEX2	3975403	33593	700mSIPHEX2	27.6346	330280538	928329	1.09441e+08	27.5296	8.3352e-08	8.3352
		SIP_700_Bin22	700mSIPHEX2_22_scaffold_331_c1	700mSIPHEX2	3975403	32035	700mSIPHEX2	27.6915	330280538	887097	1.09441e+08	27.5296	8.3352e-08	8.3352
		SIP_700_Bin22	700mSIPHEX2_22_scaffold_339_c1	700mSIPHEX2	3975403	31450	700mSIPHEX2	30.2195	330280538	950403	1.09441e+08	27.5296	8.3352e-08	8.3352
		SIP_700_Bin22	700mSIPHEX2_22_scaffold_349_c1	700mSIPHEX2	3975403	30693	700mSIPHEX2	29.2776	330280538	898617	1.09441e+08	27.5296	8.3352e-08	8.3352
		SIP_700_Bin22	700mSIPHEX2_22_scaffold_351_c1	700mSIPHEX2	3975403	30262	700mSIPHEX2	26.4042	330280538	799044	1.09441e+08	27.5296	8.3352e-08	8.3352
		SIP_700_Bin22	700mSIPHEX2_22_scaffold_375_c1	700mSIPHEX2	3975403	27326	700mSIPHEX2	26.8643	330280538	734094	1.09441e+08	27.5296	8.3352e-08	8.3352
		SIP_700_Bin22	700mSIPHEX2_22_scaffold_380_c1	700mSIPHEX2	3975403	27063	700mSIPHEX2	27.1358	330280538	734376	1.09441e+08	27.5296	8.3352e-08	8.3352
		SIP_700_Bin22	700mSIPHEX2_22_scaffold_384_c1	700mSIPHEX2	3975403	26873	700mSIPHEX2	30.5506	330280538	820986	1.09441e+08	27.5296	8.3352e-08	8.3352
		SIP_700_Bin22	700mSIPHEX2_22_scaffold_389_c1	700mSIPHEX2	3975403	25990	700mSIPHEX2	28.5282	330280538	741448	1.09441e+08	27.5296	8.3352e-08	8.3352
		SIP_700_Bin22	700mSIPHEX2_22_scaffold_393_c1	700mSIPHEX2	3975403	25569	700mSIPHEX2	27.5117	330280538	703447	1.09441e+08	27.5296	8.3352e-08	8.3352
		SIP_700_Bin22	700mSIPHEX2_22_scaffold_394_c1	700mSIPHEX2	3975403	25514	700mSIPHEX2	25.4022	330280538	648112	1.09441e+08	27.5296	8.3352e-08	8.3352
		SIP_700_Bin22	700mSIPHEX2_22_scaffold_400_c1	700mSIPHEX2	3975403	25026	700mSIPHEX2	23.9428	330280538	599193	1.09441e+08	27.5296	8.3352e-08	8.3352
		SIP_700_Bin22	700mSIPHEX2_22_scaffold_401_c1	700mSIPHEX2	3975403	24978	700mSIPHEX2	29.8134	330280538	744679	1.09441e+08	27.5296	8.3352e-08	8.3352
		SIP_700_Bin22	700mSIPHEX2_22_scaffold_409_c1	700mSIPHEX2	3975403	23947	700mSIPHEX2	26.9469	330280538	645297	1.09441e+08	27.5296	8.3352e-08	8.3352
		SIP_700_Bin22	700mSIPHEX2_22_scaffold_414_c1	700mSIPHEX2	3975403	23663	700mSIPHEX2	25.6794	330280538	607652	1.09441e+08	27.5296	8.3352e-08	8.3352
		SIP_700_Bin22	700mSIPHEX2_22_scaffold_416_c1	700mSIPHEX2	3975403	23586	700mSIPHEX2	30.0639	330280538	709087	1.09441e+08	27.5296	8.3352e-08	8.3352
		SIP_700_Bin22	700mSIPHEX2_22_scaffold_420_c1	700mSIPHEX2	3975403	23217	700mSIPHEX2	28.5268	330280538	662307	1.09441e+08	27.5296	8.3352e-08	8.3352
		SIP_700_Bin22	700mSIPHEX2_22_scaffold_425_c1	700mSIPHEX2	3975403	22762	700mSIPHEX2	28.1485	330280538	640716	1.09441e+08	27.5296	8.3352e-08	8.3352
		SIP_700_Bin22	700mSIPHEX2_22_scaffold_426_c1	700mSIPHEX2	3975403	22750	700mSIPHEX2	28.9359	330280538	658292	1.09441e+08	27.5296	8.3352e-08	8.3352
		SIP_700_Bin22	700mSIPHEX2_22_scaffold_433_c1	700mSIPHEX2	3975403	22322	700mSIPHEX2	26.8591	330280538	599549	1.09441e+08	27.5296	8.3352e-08	8.3352
		SIP_700_Bin22	700mSIPHEX2_22_scaffold_438_c1	700mSIPHEX2	3975403	21951	700mSIPHEX2	28.1036	330280538	616902	1.09441e+08	27.5296	8.3352e-08	8.3352
		SIP_700_Bin22	700mSIPHEX2_22_scaffold_442_c1	700mSIPHEX2	3975403	21640	700mSIPHEX2	26.0538	330280538	563804	1.09441e+08	27.5296	8.3352e-08	8.3352
		SIP_700_Bin22	700mSIPHEX2_22_scaffold_456_c1	700mSIPHEX2	3975403	20626	700mSIPHEX2	30.3962	330280538	626952	1.09441e+08	27.5296	8.3352e-08	8.3352
		SIP_700_Bin22	700mSIPHEX2_22_scaffold_460_c1	700mSIPHEX2	3975403	20508	700mSIPHEX2	29.2064	330280538	598965	1.09441e+08	27.5296	8.3352e-08	8.3352
		SIP_700_Bin22	700mSIPHEX2_22_scaffold_467_c1	700mSIPHEX2	3975403	20130	700mSIPHEX2	27.0051	330280538	543613	1.09441e+08	27.5296	8.3352e-08	8.3352
		SIP_700_Bin22	700mSIPHEX2_22_scaffold_478_c1	700mSIPHEX2	3975403	19395	700mSIPHEX2	29.4791	330280538	571747	1.09441e+08	27.5296	8.3352e-08	8.3352
		SIP_700_Bin22	700mSIPHEX2_22_scaffold_498_c1	700mSIPHEX2	3975403	18149	700mSIPHEX2	26.4968	330280538	480890	1.09441e+08	27.5296	8.3352e-08	8.3352
		SIP_700_Bin22	700mSIPHEX2_22_scaffold_499_c1	700mSIPHEX2	3975403	18109	700mSIPHEX2	26.9833	330280538	488641	1.09441e+08	27.5296	8.3352e-08	8.3352
		SIP_700_Bin22	700mSIPHEX2_22_scaffold_520_c1	700mSIPHEX2	3975403	17234	700mSIPHEX2	25.6735	330280538	442457	1.09441e+08	27.5296	8.3352e-08	8.3352
		SIP_700_Bin22	700mSIPHEX2_22_scaffold_532_c1	700mSIPHEX2	3975403	16613	700mSIPHEX2	27.28	330280538	453203	1.09441e+08	27.5296	8.3352e-08	8.3352
		SIP_700_Bin22	700mSIPHEX2_22_scaffold_547_c1	700mSIPHEX2	3975403	15996	700mSIPHEX2	27.5377	330280538	440493	1.09441e+08	27.5296	8.3352e-08	8.3352
		SIP_700_Bin22	700mSIPHEX2_22_scaffold_550_c1	700mSIPHEX2	3975403	15953	700mSIPHEX2	33.802	330280538	539243	1.09441e+08	27.5296	8.3352e-08	8.3352
		SIP_700_Bin22	700mSIPHEX2_22_scaffold_561_c1	700mSIPHEX2	3975403	15613	700mSIPHEX2	32.8903	330280538	513516	1.09441e+08	27.5296	8.3352e-08	8.3352
		SIP_700_Bin22	700mSIPHEX2_22_scaffold_567_c1	700mSIPHEX2	3975403	15335	700mSIPHEX2	26.4489	330280538	405594	1.09441e+08	27.5296	8.3352e-08	8.3352
		SIP_700_Bin22	700mSIPHEX2_22_scaffold_578_c1	700mSIPHEX2	3975403	15108	700mSIPHEX2	25.8572	330280538	390651	1.09441e+08	27.5296	8.3352e-08	8.3352
		SIP_700_Bin22	700mSIPHEX2_22_scaffold_647_c1	700mSIPHEX2	3975403	13367	700mSIPHEX2	25.7431	330280538	344108	1.09441e+08	27.5296	8.3352e-08	8.3352
		SIP_700_Bin22	700mSIPHEX2_22_scaffold_676_c1	700mSIPHEX2	3975403	12814	700mSIPHEX2	25.3636	330280538	325009	1.09441e+08	27.5296	8.3352e-08	8.3352
		SIP_700_Bin22	700mSIPHEX2_22_scaffold_716_c1	700mSIPHEX2	3975403	11947	700mSIPHEX2	29.4214	330280538	351497	1.09441e+08	27.5296	8.3352e-08	8.3352
		SIP_700_Bin22	700mSIPHEX2_22_scaffold_739_c1	700mSIPHEX2	3975403	11699	700mSIPHEX2	29.1568	330280538	341105	1.09441e+08	27.5296	8.3352e-08	8.3352
		SIP_700_Bin22	700mSIPHEX2_22_scaffold_754_c1	700mSIPHEX2	3975403	11312	700mSIPHEX2	20.7082	330280538	234251	1.09441e+08	27.5296	8.3352e-08	8.3352
		SIP_700_Bin22	700mSIPHEX2_22_scaffold_769_c1	700mSIPHEX2	3975403	11108	700mSIPHEX2	28.1164	330280538	312317	1.09441e+08	27.5296	8.3352e-08	8.3352
		SIP_700_Bin22	700mSIPHEX2_22_scaffold_770_c1	700mSIPHEX2	3975403	11100	700mSIPHEX2	37.9705	330280538	421473	1.09441e+08	27.5296	8.3352e-08	8.3352
		SIP_700_Bin22	700mSIPHEX2_22_scaffold_788_c1	700mSIPHEX2	3975403	10798	700mSIPHEX2	30.4344	330280538	328631	1.09441e+08	27.5296	8.3352e-08	8.3352
		SIP_700_Bin22	700mSIPHEX2_22_scaffold_789_c1	700mSIPHEX2	3975403	10778	700mSIPHEX2	30.6319	330280538	330151	1.09441e+08	27.5296	8.3352e-08	8.3352
		SIP_700_Bin22	700mSIPHEX2_22_scaffold_792_c1	700mSIPHEX2	3975403	10721	700mSIPHEX2	29.4505	330280538	315739	1.09441e+08	27.5296	8.3352e-08	8.3352
		SIP_700_Bin22	700mSIPHEX2_22_scaffold_830_c1	700mSIPHEX2	3975403	10199	700mSIPHEX2	26.7055	330280538	272369	1.09441e+08	27.5296	8.3352e-08	8.3352
		SIP_700_Bin22	700mSIPHEX2_22_scaffold_847_c1	700mSIPHEX2	3975403	10015	700mSIPHEX2	30.3399	330280538	303854	1.09441e+08	27.5296	8.3352e-08	8.3352
		SIP_700_Bin22	700mSIPHEX2_22_scaffold_856_c1	700mSIPHEX2	3975403	9877	700mSIPHEX2	24.8485	330280538	245429	1.09441e+08	27.5296	8.3352e-08	8.3352
		SIP_700_Bin22	700mSIPHEX2_22_scaffold_857_c1	700mSIPHEX2	3975403	9874	700mSIPHEX2	26.7448	330280538	264078	1.09441e+08	27.5296	8.3352e-08	8.3352
		SIP_700_Bin22	700mSIPHEX2_22_scaffold_895_c1	700mSIPHEX2	3975403	9429	700mSIPHEX2	28.3587	330280538	267394	1.09441e+08	27.5296	8.3352e-08	8.3352
		SIP_700_Bin22	700mSIPHEX2_22_scaffold_899_c1	700mSIPHEX2	3975403	9394	700mSIPHEX2	29.4465	330280538	276620	1.09441e+08	27.5296	8.3352e-08	8.3352
		SIP_700_Bin22	700mSIPHEX2_22_scaffold_900_c1	700mSIPHEX2	3975403	9364	700mSIPHEX2	22.9785	330280538	215171	1.09441e+08	27.5296	8.3352e-08	8.3352
		SIP_700_Bin22	700mSIPHEX2_22_scaffold_915_c1	700mSIPHEX2	3975403	9236	700mSIPHEX2	30.0482	330280538	277525	1.09441e+08	27.5296	8.3352e-08	8.3352
		SIP_700_Bin22	700mSIPHEX2_22_scaffold_974_c1	700mSIPHEX2	3975403	8572	700mSIPHEX2	26.9605	330280538	231105	1.09441e+08	27.5296	8.3352e-08	8.3352
		SIP_700_Bin22	700mSIPHEX2_22_scaffold_1036_c1	700mSIPHEX2	3975403	8142	700mSIPHEX2	16.164	330280538	131607	1.09441e+08	27.5296	8.3352e-08	8.3352
		SIP_700_Bin22	700mSIPHEX2_22_scaffold_1043_c1	700mSIPHEX2	3975403	8065	700mSIPHEX2	31.8905	330280538	257197	1.09441e+08	27.5296	8.3352e-08	8.3352
		SIP_700_Bin22	700mSIPHEX2_22_scaffold_1126_c1	700mSIPHEX2	3975403	7427	700mSIPHEX2	29.3926	330280538	218299	1.09441e+08	27.5296	8.3352e-08	8.3352
		SIP_700_Bin22	700mSIPHEX2_22_scaffold_1163_c1	700mSIPHEX2	3975403	7184	700mSIPHEX2	26.0826	330280538	187377	1.09441e+08	27.5296	8.3352e-08	8.3352
		SIP_700_Bin22	700mSIPHEX2_22_scaffold_1368_c1	700mSIPHEX2	3975403	6098	700mSIPHEX2	29.3431	330280538	178934	1.09441e+08	27.5296	8.3352e-08	8.3352
		SIP_700_Bin22	700mSIPHEX2_22_scaffold_1372_c1	700mSIPHEX2	3975403	6083	700mSIPHEX2	25.6671	330280538	156133	1.09441e+08	27.5296	8.3352e-08	8.3352
		SIP_700_Bin22	700mSIPHEX2_22_scaffold_1406_c1	700mSIPHEX2	3975403	5954	700mSIPHEX2	32.53	330280538	193684	1.09441e+08	27.5296	8.3352e-08	8.3352
		SIP_700_Bin22	700mSIPHEX2_22_scaffold_1430_c1	700mSIPHEX2	3975403	5887	700mSIPHEX2	29.1539	330280538	171629	1.09441e+08	27.5296	8.3352e-08	8.3352
		SIP_700_Bin22	700mSIPHEX2_22_scaffold_1455_c1	700mSIPHEX2	3975403	5790	700mSIPHEX2	31.8486	330280538	184403	1.09441e+08	27.5296	8.3352e-08	8.3352
		SIP_700_Bin22	700mSIPHEX2_22_scaffold_1522_c1	700mSIPHEX2	3975403	5566	700mSIPHEX2	24.9173	330280538	138690	1.09441e+08	27.5296	8.3352e-08	8.3352
		SIP_700_Bin22	700mSIPHEX2_22_scaffold_1540_c1	700mSIPHEX2	3975403	5505	700mSIPHEX2	29.1094	330280538	160247	1.09441e+08	27.5296	8.3352e-08	8.3352
		SIP_700_Bin22	700mSIPHEX2_22_scaffold_1617_c1	700mSIPHEX2	3975403	5295	700mSIPHEX2	28.3405	330280538	150063	1.09441e+08	27.5296	8.3352e-08	8.3352
		SIP_700_Bin22	700mSIPHEX2_22_scaffold_1672_c1	700mSIPHEX2	3975403	5115	700mSIPHEX2	30.2073	330280538	154510	1.09441e+08	27.5296	8.3352e-08	8.3352
		SIP_700_Bin22	700mSIPHEX2_22_scaffold_1874_c1	700mSIPHEX2	3975403	4615	700mSIPHEX2	26.8011	330280538	123687	1.09441e+08	27.5296	8.3352e-08	8.3352
		SIP_700_Bin22	700mSIPHEX2_22_scaffold_2562_c1	700mSIPHEX2	3975403	3561	700mSIPHEX2	29.6957	330280538	105746	1.09441e+08	27.5296	8.3352e-08	8.3352
		SIP_700_Bin22	700mSIPHEX2_22_scaffold_2606_c1	700mSIPHEX2	3975403	3504	700mSIPHEX2	28.0817	330280538	98398.3	1.09441e+08	27.5296	8.3352e-08	8.3352
		SIP_700_Bin22	700mSIPHEX2_22_scaffold_2643_c1	700mSIPHEX2	3975403	3469	700mSIPHEX2	18.3531	330280538	63666.9	1.09441e+08	27.5296	8.3352e-08	8.3352
		SIP_700_Bin22	700mSIPHEX2_22_scaffold_2663_c1	700mSIPHEX2	3975403	3440	700mSIPHEX2	25.896	330280538	89082.2	1.09441e+08	27.5296	8.3352e-08	8.3352
		SIP_700_Bin22	700mSIPHEX2_22_scaffold_3265_c1	700mSIPHEX2	3975403	2883	700mSIPHEX2	35.0948	330280538	101178	1.09441e+08	27.5296	8.3352e-08	8.3352
		SIP_700_Bin22	700mSIPHEX2_22_scaffold_3483_c1	700mSIPHEX2	3975403	2725	700mSIPHEX2	39.5779	330280538	107850	1.09441e+08	27.5296	8.3352e-08	8.3352
		SIP_700_Bin22	700mSIPHEX2_22_scaffold_3773_c1	700mSIPHEX2	3975403	2553	700mSIPHEX2	24.1868	330280538	61748.9	1.09441e+08	27.5296	8.3352e-08	8.3352
		SIP_700_Bin22	700mSIPHEX2_22_scaffold_4463_c1	700mSIPHEX2	3975403	2193	700mSIPHEX2	31.5188	330280538	69120.7	1.09441e+08	27.5296	8.3352e-08	8.3352
		SIP_5_Bin13	5mSIPHEX1_13_scaffold_1_c1	5mSIPHEX1	2886452	1204180	5mSIPHEX1	1453.72	243158626	1.75054e+09	4.45028e+09	1541.78	6.34064e-06	634.064
		SIP_5_Bin13	5mSIPHEX1_13_scaffold_2_c1	5mSIPHEX1	2886452	583211	5mSIPHEX1	1555.35	243158626	9.07097e+08	4.45028e+09	1541.78	6.34064e-06	634.064
		SIP_5_Bin13	5mSIPHEX1_13_scaffold_44_c1	5mSIPHEX1	2886452	248851	5mSIPHEX1	1559.52	243158626	3.88088e+08	4.45028e+09	1541.78	6.34064e-06	634.064
		SIP_5_Bin13	5mSIPHEX1_13_scaffold_2_c2	5mSIPHEX1	2886452	232305	5mSIPHEX1	1663.1	243158626	3.86346e+08	4.45028e+09	1541.78	6.34064e-06	634.064
		SIP_5_Bin13	5mSIPHEX1_13_scaffold_54_c1	5mSIPHEX1	2886452	216733	5mSIPHEX1	1695.2	243158626	3.67406e+08	4.45028e+09	1541.78	6.34064e-06	634.064
		SIP_5_Bin13	5mSIPHEX1_13_scaffold_93_c1	5mSIPHEX1	2886452	139788	5mSIPHEX1	1808.42	243158626	2.52795e+08	4.45028e+09	1541.78	6.34064e-06	634.064
		SIP_5_Bin13	5mSIPHEX1_13_scaffold_102_c1	5mSIPHEX1	2886452	128140	5mSIPHEX1	1465.43	243158626	1.8778e+08	4.45028e+09	1541.78	6.34064e-06	634.064
		SIP_5_Bin13	5mSIPHEX1_13_scaffold_165_c1	5mSIPHEX1	2886452	77546	5mSIPHEX1	1890.84	243158626	1.46627e+08	4.45028e+09	1541.78	6.34064e-06	634.064
		SIP_5_Bin13	5mSIPHEX1_13_scaffold_356_c1	5mSIPHEX1	2886452	36270	5mSIPHEX1	1105.42	243158626	4.00936e+07	4.45028e+09	1541.78	6.34064e-06	634.064
		SIP_5_Bin13	5mSIPHEX1_13_scaffold_616_c1	5mSIPHEX1	2886452	19430	5mSIPHEX1	1209.65	243158626	2.35035e+07	4.45028e+09	1541.78	6.34064e-06	634.064
		SIP_5_Bin0	5mSIPHEX1_0_scaffold_3_c1	5mSIPHEX1	3292271	710174	5mSIPHEX1	19.2131	243158626	1.36446e+07	5.97967e+07	18.1628	7.46951e-08	7.46951
		SIP_5_Bin0	5mSIPHEX1_0_scaffold_4_c1	5mSIPHEX1	3292271	673114	5mSIPHEX1	18.7454	243158626	1.26178e+07	5.97967e+07	18.1628	7.46951e-08	7.46951
		SIP_5_Bin0	5mSIPHEX1_0_scaffold_9_c1	5mSIPHEX1	3292271	463471	5mSIPHEX1	17.4166	243158626	8.07209e+06	5.97967e+07	18.1628	7.46951e-08	7.46951
		SIP_5_Bin0	5mSIPHEX1_0_scaffold_12_c2	5mSIPHEX1	3292271	429550	5mSIPHEX1	18.4125	243158626	7.90909e+06	5.97967e+07	18.1628	7.46951e-08	7.46951
		SIP_5_Bin0	5mSIPHEX1_0_scaffold_23_c1	5mSIPHEX1	3292271	330400	5mSIPHEX1	19.2919	243158626	6.37404e+06	5.97967e+07	18.1628	7.46951e-08	7.46951
		SIP_5_Bin0	5mSIPHEX1_0_scaffold_41_c1	5mSIPHEX1	3292271	255084	5mSIPHEX1	17.7353	243158626	4.52399e+06	5.97967e+07	18.1628	7.46951e-08	7.46951
		SIP_5_Bin0	5mSIPHEX1_0_scaffold_62_c1	5mSIPHEX1	3292271	199818	5mSIPHEX1	18.4155	243158626	3.67975e+06	5.97967e+07	18.1628	7.46951e-08	7.46951
		SIP_5_Bin0	5mSIPHEX1_0_scaffold_190_c1	5mSIPHEX1	3292271	68228	5mSIPHEX1	17.7224	243158626	1.20916e+06	5.97967e+07	18.1628	7.46951e-08	7.46951
		SIP_5_Bin0	5mSIPHEX1_0_scaffold_256_c1	5mSIPHEX1	3292271	52167	5mSIPHEX1	13.4138	243158626	699758	5.97967e+07	18.1628	7.46951e-08	7.46951
		SIP_5_Bin0	5mSIPHEX1_0_scaffold_659_c1	5mSIPHEX1	3292271	18048	5mSIPHEX1	19.1844	243158626	346240	5.97967e+07	18.1628	7.46951e-08	7.46951
		SIP_5_Bin0	5mSIPHEX1_0_scaffold_1104_c1	5mSIPHEX1	3292271	10263	5mSIPHEX1	5.95807	243158626	61147.7	5.97967e+07	18.1628	7.46951e-08	7.46951
		SIP_5_Bin0	5mSIPHEX1_0_scaffold_1458_c1	5mSIPHEX1	3292271	7795	5mSIPHEX1	7.00026	243158626	54567	5.97967e+07	18.1628	7.46951e-08	7.46951
		SIP_5_Bin0	5mSIPHEX1_0_scaffold_2702_c1	5mSIPHEX1	3292271	4444	5mSIPHEX1	5.16092	243158626	22935.1	5.97967e+07	18.1628	7.46951e-08	7.46951
		SIP_5_Bin0	5mSIPHEX1_0_scaffold_2721_c1	5mSIPHEX1	3292271	4428	5mSIPHEX1	6.75035	243158626	29890.5	5.97967e+07	18.1628	7.46951e-08	7.46951
		SIP_5_Bin0	5mSIPHEX1_0_scaffold_2931_c1	5mSIPHEX1	3292271	4175	5mSIPHEX1	5.16323	243158626	21556.5	5.97967e+07	18.1628	7.46951e-08	7.46951
		SIP_5_Bin0	5mSIPHEX1_0_scaffold_2955_c1	5mSIPHEX1	3292271	4160	5mSIPHEX1	5.84688	243158626	24323	5.97967e+07	18.1628	7.46951e-08	7.46951
		SIP_5_Bin0	5mSIPHEX1_0_scaffold_3031_c1	5mSIPHEX1	3292271	4088	5mSIPHEX1	6.0965	243158626	24922.5	5.97967e+07	18.1628	7.46951e-08	7.46951
		SIP_5_Bin0	5mSIPHEX1_0_scaffold_3033_c1	5mSIPHEX1	3292271	4087	5mSIPHEX1	5.81179	243158626	23752.8	5.97967e+07	18.1628	7.46951e-08	7.46951
		SIP_5_Bin0	5mSIPHEX1_0_scaffold_3216_c1	5mSIPHEX1	3292271	3903	5mSIPHEX1	28.6017	243158626	111632	5.97967e+07	18.1628	7.46951e-08	7.46951
		SIP_5_Bin0	5mSIPHEX1_0_scaffold_3256_c1	5mSIPHEX1	3292271	3874	5mSIPHEX1	5.80129	243158626	22474.2	5.97967e+07	18.1628	7.46951e-08	7.46951
		SIP_5_Bin0	5mSIPHEX1_0_scaffold_3388_c1	5mSIPHEX1	3292271	3742	5mSIPHEX1	6.34883	243158626	23757.3	5.97967e+07	18.1628	7.46951e-08	7.46951
		SIP_5_Bin0	5mSIPHEX1_0_scaffold_3473_c1	5mSIPHEX1	3292271	3663	5mSIPHEX1	5.02448	243158626	18404.7	5.97967e+07	18.1628	7.46951e-08	7.46951
		SIP_5_Bin0	5mSIPHEX1_0_scaffold_3476_c1	5mSIPHEX1	3292271	3659	5mSIPHEX1	5.03733	243158626	18431.6	5.97967e+07	18.1628	7.46951e-08	7.46951
		SIP_5_Bin0	5mSIPHEX1_0_scaffold_3573_c1	5mSIPHEX1	3292271	3586	5mSIPHEX1	6.08498	243158626	21820.7	5.97967e+07	18.1628	7.46951e-08	7.46951
		SIP_5_Bin0	5mSIPHEX1_0_scaffold_3616_c1	5mSIPHEX1	3292271	3556	5mSIPHEX1	6.68203	243158626	23761.3	5.97967e+07	18.1628	7.46951e-08	7.46951
		SIP_5_Bin0	5mSIPHEX1_0_scaffold_3679_c1	5mSIPHEX1	3292271	3509	5mSIPHEX1	5.96695	243158626	20938	5.97967e+07	18.1628	7.46951e-08	7.46951
		SIP_5_Bin0	5mSIPHEX1_0_scaffold_3792_c1	5mSIPHEX1	3292271	3442	5mSIPHEX1	29.2445	243158626	100660	5.97967e+07	18.1628	7.46951e-08	7.46951
		SIP_5_Bin0	5mSIPHEX1_0_scaffold_3929_c1	5mSIPHEX1	3292271	3344	5mSIPHEX1	6.74984	243158626	22571.5	5.97967e+07	18.1628	7.46951e-08	7.46951
		SIP_5_Bin0	5mSIPHEX1_0_scaffold_4088_c1	5mSIPHEX1	3292271	3238	5mSIPHEX1	5.62694	243158626	18220	5.97967e+07	18.1628	7.46951e-08	7.46951
		SIP_5_Bin0	5mSIPHEX1_0_scaffold_4294_c1	5mSIPHEX1	3292271	3137	5mSIPHEX1	5.57348	243158626	17484	5.97967e+07	18.1628	7.46951e-08	7.46951
		SIP_5_Bin0	5mSIPHEX1_0_scaffold_4349_c1	5mSIPHEX1	3292271	3115	5mSIPHEX1	5.80169	243158626	18072.3	5.97967e+07	18.1628	7.46951e-08	7.46951
		SIP_5_Bin0	5mSIPHEX1_0_scaffold_4569_c1	5mSIPHEX1	3292271	3009	5mSIPHEX1	6.26023	243158626	18837	5.97967e+07	18.1628	7.46951e-08	7.46951
		SIP_5_Bin25_sub	5mSIPHEX1_25_scaffold_5_c1	5mSIPHEX1	3510082	649480	5mSIPHEX1	2802.42	243158626	1.82012e+09	1.03786e+10	2956.81	1.216e-05	1216
		SIP_5_Bin25_sub	5mSIPHEX1_25_scaffold_13_c1	5mSIPHEX1	3510082	410873	5mSIPHEX1	2962.98	243158626	1.21741e+09	1.03786e+10	2956.81	1.216e-05	1216
		SIP_5_Bin25_sub	5mSIPHEX1_25_scaffold_42_c1	5mSIPHEX1	3510082	252193	5mSIPHEX1	2960.33	243158626	7.46575e+08	1.03786e+10	2956.81	1.216e-05	1216
		SIP_5_Bin25_sub	5mSIPHEX1_25_scaffold_46_c1	5mSIPHEX1	3510082	238715	5mSIPHEX1	2860.5	243158626	6.82844e+08	1.03786e+10	2956.81	1.216e-05	1216
		SIP_5_Bin25_sub	5mSIPHEX1_25_scaffold_56_c1	5mSIPHEX1	3510082	212976	5mSIPHEX1	3112.68	243158626	6.62926e+08	1.03786e+10	2956.81	1.216e-05	1216
		SIP_5_Bin25_sub	5mSIPHEX1_25_scaffold_57_c1	5mSIPHEX1	3510082	211130	5mSIPHEX1	3043.89	243158626	6.42656e+08	1.03786e+10	2956.81	1.216e-05	1216
		SIP_5_Bin25_sub	5mSIPHEX1_25_scaffold_74_c1	5mSIPHEX1	3510082	164751	5mSIPHEX1	3181.58	243158626	5.24168e+08	1.03786e+10	2956.81	1.216e-05	1216
		SIP_5_Bin25_sub	5mSIPHEX1_25_scaffold_76_c1	5mSIPHEX1	3510082	161739	5mSIPHEX1	3164.25	243158626	5.11783e+08	1.03786e+10	2956.81	1.216e-05	1216
		SIP_5_Bin25_sub	5mSIPHEX1_25_scaffold_115_c1	5mSIPHEX1	3510082	117628	5mSIPHEX1	2850.86	243158626	3.35341e+08	1.03786e+10	2956.81	1.216e-05	1216
		SIP_5_Bin25_sub	5mSIPHEX1_25_scaffold_127_c1	5mSIPHEX1	3510082	102368	5mSIPHEX1	3082.9	243158626	3.1559e+08	1.03786e+10	2956.81	1.216e-05	1216
		SIP_5_Bin25_sub	5mSIPHEX1_25_scaffold_142_c1	5mSIPHEX1	3510082	91821	5mSIPHEX1	3161.44	243158626	2.90287e+08	1.03786e+10	2956.81	1.216e-05	1216
		SIP_5_Bin25_sub	5mSIPHEX1_25_scaffold_174_c1	5mSIPHEX1	3510082	73099	5mSIPHEX1	2815.37	243158626	2.05801e+08	1.03786e+10	2956.81	1.216e-05	1216
		SIP_5_Bin25_sub	5mSIPHEX1_25_scaffold_188_c1	5mSIPHEX1	3510082	69248	5mSIPHEX1	2989.69	243158626	2.0703e+08	1.03786e+10	2956.81	1.216e-05	1216
		SIP_5_Bin25_sub	5mSIPHEX1_25_scaffold_199_c1	5mSIPHEX1	3510082	66155	5mSIPHEX1	2765.31	243158626	1.82939e+08	1.03786e+10	2956.81	1.216e-05	1216
		SIP_5_Bin25_sub	5mSIPHEX1_25_scaffold_211_c1	5mSIPHEX1	3510082	61010	5mSIPHEX1	2777.42	243158626	1.6945e+08	1.03786e+10	2956.81	1.216e-05	1216
		SIP_5_Bin25_sub	5mSIPHEX1_25_scaffold_239_c1	5mSIPHEX1	3510082	55523	5mSIPHEX1	2941.65	243158626	1.63329e+08	1.03786e+10	2956.81	1.216e-05	1216
		SIP_5_Bin25_sub	5mSIPHEX1_25_scaffold_253_c1	5mSIPHEX1	3510082	53057	5mSIPHEX1	3401.42	243158626	1.80469e+08	1.03786e+10	2956.81	1.216e-05	1216
		SIP_5_Bin25_sub	5mSIPHEX1_25_scaffold_286_c1	5mSIPHEX1	3510082	46990	5mSIPHEX1	3277.13	243158626	1.53992e+08	1.03786e+10	2956.81	1.216e-05	1216
		SIP_5_Bin25_sub	5mSIPHEX1_25_scaffold_296_c1	5mSIPHEX1	3510082	45169	5mSIPHEX1	3111.91	243158626	1.40562e+08	1.03786e+10	2956.81	1.216e-05	1216
		SIP_5_Bin25_sub	5mSIPHEX1_25_scaffold_300_c1	5mSIPHEX1	3510082	44367	5mSIPHEX1	2850.98	243158626	1.26489e+08	1.03786e+10	2956.81	1.216e-05	1216
		SIP_5_Bin25_sub	5mSIPHEX1_25_scaffold_318_c1	5mSIPHEX1	3510082	41671	5mSIPHEX1	2732.43	243158626	1.13863e+08	1.03786e+10	2956.81	1.216e-05	1216
		SIP_5_Bin25_sub	5mSIPHEX1_25_scaffold_352_c1	5mSIPHEX1	3510082	36698	5mSIPHEX1	2819.48	243158626	1.03469e+08	1.03786e+10	2956.81	1.216e-05	1216
		SIP_5_Bin25_sub	5mSIPHEX1_25_scaffold_354_c1	5mSIPHEX1	3510082	36575	5mSIPHEX1	2981.96	243158626	109065187	1.03786e+10	2956.81	1.216e-05	1216
		SIP_5_Bin25_sub	5mSIPHEX1_25_scaffold_370_c1	5mSIPHEX1	3510082	34772	5mSIPHEX1	3015.16	243158626	1.04843e+08	1.03786e+10	2956.81	1.216e-05	1216
		SIP_5_Bin25_sub	5mSIPHEX1_25_scaffold_371_c1	5mSIPHEX1	3510082	34754	5mSIPHEX1	2605.04	243158626	9.05356e+07	1.03786e+10	2956.81	1.216e-05	1216
		SIP_5_Bin25_sub	5mSIPHEX1_25_scaffold_487_c1	5mSIPHEX1	3510082	25157	5mSIPHEX1	2713.87	243158626	6.82728e+07	1.03786e+10	2956.81	1.216e-05	1216
		SIP_5_Bin25_sub	5mSIPHEX1_25_scaffold_615_c1	5mSIPHEX1	3510082	19436	5mSIPHEX1	4773.78	243158626	9.27832e+07	1.03786e+10	2956.81	1.216e-05	1216
		SIP_5_Bin25_sub	5mSIPHEX1_25_scaffold_643_c1	5mSIPHEX1	3510082	18551	5mSIPHEX1	2885.9	243158626	5.35363e+07	1.03786e+10	2956.81	1.216e-05	1216
		SIP_5_Bin25_sub	5mSIPHEX1_25_scaffold_530_c3	5mSIPHEX1	3510082	17623	5mSIPHEX1	575.71	243158626	1.01457e+07	1.03786e+10	2956.81	1.216e-05	1216
		SIP_5_Bin25_sub	5mSIPHEX1_25_scaffold_285_c1	5mSIPHEX1	3510082	16019	5mSIPHEX1	3648.75	243158626	5.84493e+07	1.03786e+10	2956.81	1.216e-05	1216
		SIP_5_Bin25_sub	5mSIPHEX1_25_scaffold_857_c1	5mSIPHEX1	3510082	13602	5mSIPHEX1	2873.15	243158626	3.90806e+07	1.03786e+10	2956.81	1.216e-05	1216
		SIP_5_Bin25_sub	5mSIPHEX1_25_scaffold_905_c1	5mSIPHEX1	3510082	12841	5mSIPHEX1	2981.24	243158626	3.82821e+07	1.03786e+10	2956.81	1.216e-05	1216
		SIP_5_Bin25_sub	5mSIPHEX1_25_scaffold_923_c1	5mSIPHEX1	3510082	12558	5mSIPHEX1	4353.18	243158626	5.46672e+07	1.03786e+10	2956.81	1.216e-05	1216
		SIP_5_Bin25_sub	5mSIPHEX1_25_scaffold_1048_c1	5mSIPHEX1	3510082	10784	5mSIPHEX1	2101.23	243158626	2.26597e+07	1.03786e+10	2956.81	1.216e-05	1216
		SIP_5_Bin25_sub	5mSIPHEX1_25_scaffold_1322_c1	5mSIPHEX1	3510082	8677	5mSIPHEX1	7357.01	243158626	6.38368e+07	1.03786e+10	2956.81	1.216e-05	1216
		SIP_5_Bin25_sub	5mSIPHEX1_25_scaffold_1385_c1	5mSIPHEX1	3510082	8317	5mSIPHEX1	2950.13	243158626	2.45362e+07	1.03786e+10	2956.81	1.216e-05	1216
		SIP_5_Bin25_sub	5mSIPHEX1_25_scaffold_1579_c1	5mSIPHEX1	3510082	7153	5mSIPHEX1	1784.8	243158626	1.27667e+07	1.03786e+10	2956.81	1.216e-05	1216
		SIP_5_Bin25_sub	5mSIPHEX1_25_scaffold_1615_c1	5mSIPHEX1	3510082	6987	5mSIPHEX1	736.636	243158626	5.14688e+06	1.03786e+10	2956.81	1.216e-05	1216
		SIP_5_Bin25_sub	5mSIPHEX1_25_scaffold_1883_c1	5mSIPHEX1	3510082	5987	5mSIPHEX1	675.614	243158626	4.0449e+06	1.03786e+10	2956.81	1.216e-05	1216
		SIP_5_Bin25_sub	5mSIPHEX1_25_scaffold_1977_c1	5mSIPHEX1	3510082	5734	5mSIPHEX1	2307.38	243158626	1.32305e+07	1.03786e+10	2956.81	1.216e-05	1216
		SIP_5_Bin25_sub	5mSIPHEX1_25_scaffold_2788_c1	5mSIPHEX1	3510082	4361	5mSIPHEX1	2153.45	243158626	9.3912e+06	1.03786e+10	2956.81	1.216e-05	1216
		SIP_5_Bin25_sub	5mSIPHEX1_25_scaffold_3645_c1	5mSIPHEX1	3510082	3533	5mSIPHEX1	1779.39	243158626	6.28658e+06	1.03786e+10	2956.81	1.216e-05	1216
		SIP_5_Bin33	5mSIPHEX1_33_scaffold_6_c1	5mSIPHEX1	2704863	620709	5mSIPHEX1	31.8992	243158626	1.98001e+07	8.31564e+07	30.7433	1.26433e-07	12.6433
		SIP_5_Bin33	5mSIPHEX1_33_scaffold_17_c1	5mSIPHEX1	2704863	367636	5mSIPHEX1	28.9488	243158626	1.06426e+07	8.31564e+07	30.7433	1.26433e-07	12.6433
		SIP_5_Bin33	5mSIPHEX1_33_scaffold_18_c1	5mSIPHEX1	2704863	366512	5mSIPHEX1	33.6546	243158626	1.23348e+07	8.31564e+07	30.7433	1.26433e-07	12.6433
		SIP_5_Bin33	5mSIPHEX1_33_scaffold_37_c1	5mSIPHEX1	2704863	269534	5mSIPHEX1	31.1075	243158626	8.38453e+06	8.31564e+07	30.7433	1.26433e-07	12.6433
		SIP_5_Bin33	5mSIPHEX1_33_scaffold_61_c1	5mSIPHEX1	2704863	201481	5mSIPHEX1	28.6949	243158626	5.78148e+06	8.31564e+07	30.7433	1.26433e-07	12.6433
		SIP_5_Bin33	5mSIPHEX1_33_scaffold_92_c1	5mSIPHEX1	2704863	142431	5mSIPHEX1	25.5988	243158626	3.64606e+06	8.31564e+07	30.7433	1.26433e-07	12.6433
		SIP_5_Bin33	5mSIPHEX1_33_scaffold_100_c1	5mSIPHEX1	2704863	132063	5mSIPHEX1	31.4139	243158626	4.14861e+06	8.31564e+07	30.7433	1.26433e-07	12.6433
		SIP_5_Bin33	5mSIPHEX1_33_scaffold_101_c1	5mSIPHEX1	2704863	130751	5mSIPHEX1	32.7031	243158626	4.27596e+06	8.31564e+07	30.7433	1.26433e-07	12.6433
		SIP_5_Bin33	5mSIPHEX1_33_scaffold_135_c1	5mSIPHEX1	2704863	95820	5mSIPHEX1	26.1985	243158626	2.51034e+06	8.31564e+07	30.7433	1.26433e-07	12.6433
		SIP_5_Bin33	5mSIPHEX1_33_scaffold_146_c1	5mSIPHEX1	2704863	88506	5mSIPHEX1	34.0664	243158626	3.01508e+06	8.31564e+07	30.7433	1.26433e-07	12.6433
		SIP_5_Bin33	5mSIPHEX1_33_scaffold_200_c1	5mSIPHEX1	2704863	65718	5mSIPHEX1	26.2833	243158626	1.72729e+06	8.31564e+07	30.7433	1.26433e-07	12.6433
		SIP_5_Bin33	5mSIPHEX1_33_scaffold_226_c1	5mSIPHEX1	2704863	58459	5mSIPHEX1	30.481	243158626	1.78189e+06	8.31564e+07	30.7433	1.26433e-07	12.6433
		SIP_5_Bin33	5mSIPHEX1_33_scaffold_255_c1	5mSIPHEX1	2704863	52241	5mSIPHEX1	28.6674	243158626	1.49761e+06	8.31564e+07	30.7433	1.26433e-07	12.6433
		SIP_5_Bin33	5mSIPHEX1_33_scaffold_258_c1	5mSIPHEX1	2704863	51774	5mSIPHEX1	30.9399	243158626	1.60188e+06	8.31564e+07	30.7433	1.26433e-07	12.6433
		SIP_5_Bin33	5mSIPHEX1_33_scaffold_376_c1	5mSIPHEX1	2704863	34079	5mSIPHEX1	34.6513	243158626	1.18088e+06	8.31564e+07	30.7433	1.26433e-07	12.6433
		SIP_5_Bin33	5mSIPHEX1_33_scaffold_843_c1	5mSIPHEX1	2704863	13829	5mSIPHEX1	31.2831	243158626	432614	8.31564e+07	30.7433	1.26433e-07	12.6433
		SIP_5_Bin33	5mSIPHEX1_33_scaffold_2103_c1	5mSIPHEX1	2704863	5464	5mSIPHEX1	27.5777	243158626	150685	8.31564e+07	30.7433	1.26433e-07	12.6433
		SIP_5_Bin33	5mSIPHEX1_33_scaffold_2778_c1	5mSIPHEX1	2704863	4372	5mSIPHEX1	31.2314	243158626	136544	8.31564e+07	30.7433	1.26433e-07	12.6433
		SIP_5_Bin33	5mSIPHEX1_33_scaffold_3728_c1	5mSIPHEX1	2704863	3484	5mSIPHEX1	30.832	243158626	107419	8.31564e+07	30.7433	1.26433e-07	12.6433
		SIP_5_Bin11	5mSIPHEX1_11_scaffold_7_c2	5mSIPHEX1	3514585	533776	5mSIPHEX1	679.933	243158626	3.62932e+08	2.37634e+09	676.137	2.78064e-06	278.064
		SIP_5_Bin11	5mSIPHEX1_11_scaffold_29_c1	5mSIPHEX1	3514585	293319	5mSIPHEX1	705.976	243158626	2.07076e+08	2.37634e+09	676.137	2.78064e-06	278.064
		SIP_5_Bin11	5mSIPHEX1_11_scaffold_33_c1	5mSIPHEX1	3514585	280424	5mSIPHEX1	657.342	243158626	1.84334e+08	2.37634e+09	676.137	2.78064e-06	278.064
		SIP_5_Bin11	5mSIPHEX1_11_scaffold_43_c1	5mSIPHEX1	3514585	249440	5mSIPHEX1	715.798	243158626	1.78549e+08	2.37634e+09	676.137	2.78064e-06	278.064
		SIP_5_Bin11	5mSIPHEX1_11_scaffold_45_c1	5mSIPHEX1	3514585	241919	5mSIPHEX1	634.308	243158626	1.53451e+08	2.37634e+09	676.137	2.78064e-06	278.064
		SIP_5_Bin11	5mSIPHEX1_11_scaffold_72_c1	5mSIPHEX1	3514585	168053	5mSIPHEX1	644.398	243158626	1.08293e+08	2.37634e+09	676.137	2.78064e-06	278.064
		SIP_5_Bin11	5mSIPHEX1_11_scaffold_94_c2	5mSIPHEX1	3514585	134371	5mSIPHEX1	664.066	243158626	8.92312e+07	2.37634e+09	676.137	2.78064e-06	278.064
		SIP_5_Bin11	5mSIPHEX1_11_scaffold_103_c1	5mSIPHEX1	3514585	126369	5mSIPHEX1	691.864	243158626	8.74302e+07	2.37634e+09	676.137	2.78064e-06	278.064
		SIP_5_Bin11	5mSIPHEX1_11_scaffold_113_c1	5mSIPHEX1	3514585	116735	5mSIPHEX1	688.952	243158626	8.04248e+07	2.37634e+09	676.137	2.78064e-06	278.064
		SIP_5_Bin11	5mSIPHEX1_11_scaffold_130_c1	5mSIPHEX1	3514585	100381	5mSIPHEX1	691.836	243158626	6.94472e+07	2.37634e+09	676.137	2.78064e-06	278.064
		SIP_5_Bin11	5mSIPHEX1_11_scaffold_136_c1	5mSIPHEX1	3514585	95659	5mSIPHEX1	647.542	243158626	6.19432e+07	2.37634e+09	676.137	2.78064e-06	278.064
		SIP_5_Bin11	5mSIPHEX1_11_scaffold_132_c1	5mSIPHEX1	3514585	91094	5mSIPHEX1	696.717	243158626	6.34667e+07	2.37634e+09	676.137	2.78064e-06	278.064
		SIP_5_Bin11	5mSIPHEX1_11_scaffold_148_c1	5mSIPHEX1	3514585	85773	5mSIPHEX1	646.347	243158626	5.54391e+07	2.37634e+09	676.137	2.78064e-06	278.064
		SIP_5_Bin11	5mSIPHEX1_11_scaffold_168_c1	5mSIPHEX1	3514585	75660	5mSIPHEX1	703.5	243158626	53226810	2.37634e+09	676.137	2.78064e-06	278.064
		SIP_5_Bin11	5mSIPHEX1_11_scaffold_171_c1	5mSIPHEX1	3514585	74354	5mSIPHEX1	693.867	243158626	5.15918e+07	2.37634e+09	676.137	2.78064e-06	278.064
		SIP_5_Bin11	5mSIPHEX1_11_scaffold_182_c1	5mSIPHEX1	3514585	71611	5mSIPHEX1	690.414	243158626	4.94412e+07	2.37634e+09	676.137	2.78064e-06	278.064
		SIP_5_Bin11	5mSIPHEX1_11_scaffold_164_c2	5mSIPHEX1	3514585	60902	5mSIPHEX1	686.953	243158626	4.18368e+07	2.37634e+09	676.137	2.78064e-06	278.064
		SIP_5_Bin11	5mSIPHEX1_11_scaffold_216_c1	5mSIPHEX1	3514585	60456	5mSIPHEX1	677.755	243158626	4.09744e+07	2.37634e+09	676.137	2.78064e-06	278.064
		SIP_5_Bin11	5mSIPHEX1_11_scaffold_227_c1	5mSIPHEX1	3514585	58380	5mSIPHEX1	714.832	243158626	4.17319e+07	2.37634e+09	676.137	2.78064e-06	278.064
		SIP_5_Bin11	5mSIPHEX1_11_scaffold_307_c1	5mSIPHEX1	3514585	43307	5mSIPHEX1	734.701	243158626	3.18177e+07	2.37634e+09	676.137	2.78064e-06	278.064
		SIP_5_Bin11	5mSIPHEX1_11_scaffold_350_c1	5mSIPHEX1	3514585	36852	5mSIPHEX1	616.612	243158626	2.27234e+07	2.37634e+09	676.137	2.78064e-06	278.064
		SIP_5_Bin11	5mSIPHEX1_11_scaffold_368_c1	5mSIPHEX1	3514585	34860	5mSIPHEX1	667.916	243158626	2.32836e+07	2.37634e+09	676.137	2.78064e-06	278.064
		SIP_5_Bin11	5mSIPHEX1_11_scaffold_421_c1	5mSIPHEX1	3514585	29646	5mSIPHEX1	518.743	243158626	1.53787e+07	2.37634e+09	676.137	2.78064e-06	278.064
		SIP_5_Bin11	5mSIPHEX1_11_scaffold_432_c1	5mSIPHEX1	3514585	28404	5mSIPHEX1	731.243	243158626	2.07702e+07	2.37634e+09	676.137	2.78064e-06	278.064
		SIP_5_Bin11	5mSIPHEX1_11_scaffold_7_c1	5mSIPHEX1	3514585	27099	5mSIPHEX1	660.334	243158626	1.78944e+07	2.37634e+09	676.137	2.78064e-06	278.064
		SIP_5_Bin11	5mSIPHEX1_11_scaffold_416_c1	5mSIPHEX1	3514585	26062	5mSIPHEX1	687.972	243158626	1.79299e+07	2.37634e+09	676.137	2.78064e-06	278.064
		SIP_5_Bin11	5mSIPHEX1_11_scaffold_490_c1	5mSIPHEX1	3514585	24956	5mSIPHEX1	588.727	243158626	1.46923e+07	2.37634e+09	676.137	2.78064e-06	278.064
		SIP_5_Bin11	5mSIPHEX1_11_scaffold_499_c1	5mSIPHEX1	3514585	24615	5mSIPHEX1	545.049	243158626	1.34164e+07	2.37634e+09	676.137	2.78064e-06	278.064
		SIP_5_Bin11	5mSIPHEX1_11_scaffold_402_c2	5mSIPHEX1	3514585	23453	5mSIPHEX1	653.594	243158626	1.53287e+07	2.37634e+09	676.137	2.78064e-06	278.064
		SIP_5_Bin11	5mSIPHEX1_11_scaffold_573_c1	5mSIPHEX1	3514585	21118	5mSIPHEX1	701.351	243158626	1.48111e+07	2.37634e+09	676.137	2.78064e-06	278.064
		SIP_5_Bin11	5mSIPHEX1_11_scaffold_594_c1	5mSIPHEX1	3514585	20241	5mSIPHEX1	687.252	243158626	1.39107e+07	2.37634e+09	676.137	2.78064e-06	278.064
		SIP_5_Bin11	5mSIPHEX1_11_scaffold_707_c1	5mSIPHEX1	3514585	16781	5mSIPHEX1	354.936	243158626	5.95618e+06	2.37634e+09	676.137	2.78064e-06	278.064
		SIP_5_Bin11	5mSIPHEX1_11_scaffold_406_c1	5mSIPHEX1	3514585	16443	5mSIPHEX1	718.782	243158626	1.18189e+07	2.37634e+09	676.137	2.78064e-06	278.064
		SIP_5_Bin11	5mSIPHEX1_11_scaffold_752_c1	5mSIPHEX1	3514585	15698	5mSIPHEX1	480.449	243158626	7.54209e+06	2.37634e+09	676.137	2.78064e-06	278.064
		SIP_5_Bin11	5mSIPHEX1_11_scaffold_788_c1	5mSIPHEX1	3514585	14981	5mSIPHEX1	727.558	243158626	1.08995e+07	2.37634e+09	676.137	2.78064e-06	278.064
		SIP_5_Bin11	5mSIPHEX1_11_scaffold_406_c2	5mSIPHEX1	3514585	14923	5mSIPHEX1	707.351	243158626	1.05558e+07	2.37634e+09	676.137	2.78064e-06	278.064
		SIP_5_Bin11	5mSIPHEX1_11_scaffold_850_c1	5mSIPHEX1	3514585	13763	5mSIPHEX1	713.717	243158626	9.82289e+06	2.37634e+09	676.137	2.78064e-06	278.064
		SIP_5_Bin11	5mSIPHEX1_11_scaffold_865_c1	5mSIPHEX1	3514585	13384	5mSIPHEX1	712.644	243158626	9.53803e+06	2.37634e+09	676.137	2.78064e-06	278.064
		SIP_5_Bin11	5mSIPHEX1_11_scaffold_889_c1	5mSIPHEX1	3514585	13074	5mSIPHEX1	655.57	243158626	8.57092e+06	2.37634e+09	676.137	2.78064e-06	278.064
		SIP_5_Bin11	5mSIPHEX1_11_scaffold_907_c1	5mSIPHEX1	3514585	12799	5mSIPHEX1	712.324	243158626	9.11703e+06	2.37634e+09	676.137	2.78064e-06	278.064
		SIP_5_Bin11	5mSIPHEX1_11_scaffold_997_c1	5mSIPHEX1	3514585	11448	5mSIPHEX1	743.68	243158626	8.51365e+06	2.37634e+09	676.137	2.78064e-06	278.064
		SIP_5_Bin11	5mSIPHEX1_11_scaffold_1205_c1	5mSIPHEX1	3514585	9447	5mSIPHEX1	922.302	243158626	8.71299e+06	2.37634e+09	676.137	2.78064e-06	278.064
		SIP_5_Bin11	5mSIPHEX1_11_scaffold_711_c1	5mSIPHEX1	3514585	9415	5mSIPHEX1	744.375	243158626	7.00829e+06	2.37634e+09	676.137	2.78064e-06	278.064
		SIP_5_Bin11	5mSIPHEX1_11_scaffold_1273_c1	5mSIPHEX1	3514585	9004	5mSIPHEX1	686.076	243158626	6.17743e+06	2.37634e+09	676.137	2.78064e-06	278.064
		SIP_5_Bin11	5mSIPHEX1_11_scaffold_164_c3	5mSIPHEX1	3514585	8591	5mSIPHEX1	704.082	243158626	6.04877e+06	2.37634e+09	676.137	2.78064e-06	278.064
		SIP_5_Bin11	5mSIPHEX1_11_scaffold_402_c1	5mSIPHEX1	3514585	8224	5mSIPHEX1	721.503	243158626	5.93364e+06	2.37634e+09	676.137	2.78064e-06	278.064
		SIP_5_Bin11	5mSIPHEX1_11_scaffold_164_c1	5mSIPHEX1	3514585	7974	5mSIPHEX1	648.377	243158626	5.17016e+06	2.37634e+09	676.137	2.78064e-06	278.064
		SIP_5_Bin11	5mSIPHEX1_11_scaffold_132_c2	5mSIPHEX1	3514585	7826	5mSIPHEX1	628.251	243158626	4.91669e+06	2.37634e+09	676.137	2.78064e-06	278.064
		SIP_5_Bin11	5mSIPHEX1_11_scaffold_1545_c1	5mSIPHEX1	3514585	7354	5mSIPHEX1	705.691	243158626	5.18965e+06	2.37634e+09	676.137	2.78064e-06	278.064
		SIP_5_Bin11	5mSIPHEX1_11_scaffold_711_c2	5mSIPHEX1	3514585	7180	5mSIPHEX1	707.498	243158626	5.07984e+06	2.37634e+09	676.137	2.78064e-06	278.064
		SIP_5_Bin11	5mSIPHEX1_11_scaffold_1596_c1	5mSIPHEX1	3514585	7062	5mSIPHEX1	798.426	243158626	5.63848e+06	2.37634e+09	676.137	2.78064e-06	278.064
		SIP_5_Bin11	5mSIPHEX1_11_scaffold_1643_c1	5mSIPHEX1	3514585	6834	5mSIPHEX1	738.514	243158626	5.047e+06	2.37634e+09	676.137	2.78064e-06	278.064
		SIP_5_Bin11	5mSIPHEX1_11_scaffold_1734_c1	5mSIPHEX1	3514585	6422	5mSIPHEX1	633.806	243158626	4.0703e+06	2.37634e+09	676.137	2.78064e-06	278.064
		SIP_5_Bin11	5mSIPHEX1_11_scaffold_2359_c1	5mSIPHEX1	3514585	5005	5mSIPHEX1	786.697	243158626	3.93742e+06	2.37634e+09	676.137	2.78064e-06	278.064
		SIP_5_Bin11	5mSIPHEX1_11_scaffold_416_c2	5mSIPHEX1	3514585	4566	5mSIPHEX1	679.669	243158626	3.10337e+06	2.37634e+09	676.137	2.78064e-06	278.064
		SIP_5_Bin11	5mSIPHEX1_11_scaffold_3348_c1	5mSIPHEX1	3514585	3777	5mSIPHEX1	693.635	243158626	2.61986e+06	2.37634e+09	676.137	2.78064e-06	278.064
		SIP_5_Bin11	5mSIPHEX1_11_scaffold_530_c2	5mSIPHEX1	3514585	3321	5mSIPHEX1	775.214	243158626	2.57449e+06	2.37634e+09	676.137	2.78064e-06	278.064
		SIP1_5_Bin10	5mSIPHEX1_10_scaffold_8_c1	5mSIPHEX1	4313497	532415	5mSIPHEX1	76.0759	243158626	4.0504e+07	3.3891e+08	78.5696	3.23121e-07	32.3121
		SIP1_5_Bin10	5mSIPHEX1_10_scaffold_10_c1	5mSIPHEX1	4313497	459226	5mSIPHEX1	74.3305	243158626	3.41345e+07	3.3891e+08	78.5696	3.23121e-07	32.3121
		SIP1_5_Bin10	5mSIPHEX1_10_scaffold_16_c1	5mSIPHEX1	4313497	369414	5mSIPHEX1	85.3443	243158626	3.15274e+07	3.3891e+08	78.5696	3.23121e-07	32.3121
		SIP1_5_Bin10	5mSIPHEX1_10_scaffold_24_c1	5mSIPHEX1	4313497	317976	5mSIPHEX1	86.8141	243158626	2.76048e+07	3.3891e+08	78.5696	3.23121e-07	32.3121
		SIP1_5_Bin10	5mSIPHEX1_10_scaffold_28_c1	5mSIPHEX1	4313497	297570	5mSIPHEX1	72.0305	243158626	2.14341e+07	3.3891e+08	78.5696	3.23121e-07	32.3121
		SIP1_5_Bin10	5mSIPHEX1_10_scaffold_32_c1	5mSIPHEX1	4313497	285144	5mSIPHEX1	80.2733	243158626	2.28894e+07	3.3891e+08	78.5696	3.23121e-07	32.3121
		SIP1_5_Bin10	5mSIPHEX1_10_scaffold_36_c1	5mSIPHEX1	4313497	271263	5mSIPHEX1	87.7875	243158626	2.38135e+07	3.3891e+08	78.5696	3.23121e-07	32.3121
		SIP1_5_Bin10	5mSIPHEX1_10_scaffold_47_c1	5mSIPHEX1	4313497	236601	5mSIPHEX1	72.7259	243158626	1.7207e+07	3.3891e+08	78.5696	3.23121e-07	32.3121
		SIP1_5_Bin10	5mSIPHEX1_10_scaffold_53_c1	5mSIPHEX1	4313497	217326	5mSIPHEX1	69.2232	243158626	1.5044e+07	3.3891e+08	78.5696	3.23121e-07	32.3121
		SIP1_5_Bin10	5mSIPHEX1_10_scaffold_60_c1	5mSIPHEX1	4313497	204992	5mSIPHEX1	78.0849	243158626	1.60068e+07	3.3891e+08	78.5696	3.23121e-07	32.3121
		SIP1_5_Bin10	5mSIPHEX1_10_scaffold_67_c1	5mSIPHEX1	4313497	184752	5mSIPHEX1	85.7227	243158626	1.58374e+07	3.3891e+08	78.5696	3.23121e-07	32.3121
		SIP1_5_Bin10	5mSIPHEX1_10_scaffold_95_c1	5mSIPHEX1	4313497	138456	5mSIPHEX1	78.1753	243158626	1.08238e+07	3.3891e+08	78.5696	3.23121e-07	32.3121
		SIP1_5_Bin10	5mSIPHEX1_10_scaffold_98_c1	5mSIPHEX1	4313497	133430	5mSIPHEX1	82.7983	243158626	1.10478e+07	3.3891e+08	78.5696	3.23121e-07	32.3121
		SIP1_5_Bin10	5mSIPHEX1_10_scaffold_133_c1	5mSIPHEX1	4313497	96367	5mSIPHEX1	74.5491	243158626	7.18407e+06	3.3891e+08	78.5696	3.23121e-07	32.3121
		SIP1_5_Bin10	5mSIPHEX1_10_scaffold_149_c1	5mSIPHEX1	4313497	85396	5mSIPHEX1	86.7833	243158626	7.41095e+06	3.3891e+08	78.5696	3.23121e-07	32.3121
		SIP1_5_Bin10	5mSIPHEX1_10_scaffold_180_c1	5mSIPHEX1	4313497	72210	5mSIPHEX1	74.2679	243158626	5.36289e+06	3.3891e+08	78.5696	3.23121e-07	32.3121
		SIP1_5_Bin10	5mSIPHEX1_10_scaffold_217_c1	5mSIPHEX1	4313497	60028	5mSIPHEX1	75.9237	243158626	4.55755e+06	3.3891e+08	78.5696	3.23121e-07	32.3121
		SIP1_5_Bin10	5mSIPHEX1_10_scaffold_250_c1	5mSIPHEX1	4313497	53229	5mSIPHEX1	89.5218	243158626	4.76516e+06	3.3891e+08	78.5696	3.23121e-07	32.3121
		SIP1_5_Bin10	5mSIPHEX1_10_scaffold_322_c1	5mSIPHEX1	4313497	40242	5mSIPHEX1	71.9173	243158626	2.8941e+06	3.3891e+08	78.5696	3.23121e-07	32.3121
		SIP1_5_Bin10	5mSIPHEX1_10_scaffold_327_c1	5mSIPHEX1	4313497	39409	5mSIPHEX1	71.6375	243158626	2.82316e+06	3.3891e+08	78.5696	3.23121e-07	32.3121
		SIP1_5_Bin10	5mSIPHEX1_10_scaffold_349_c1	5mSIPHEX1	4313497	37024	5mSIPHEX1	71.0981	243158626	2.63234e+06	3.3891e+08	78.5696	3.23121e-07	32.3121
		SIP1_5_Bin10	5mSIPHEX1_10_scaffold_379_c1	5mSIPHEX1	4313497	33692	5mSIPHEX1	88.9287	243158626	2.99619e+06	3.3891e+08	78.5696	3.23121e-07	32.3121
		SIP1_5_Bin10	5mSIPHEX1_10_scaffold_435_c1	5mSIPHEX1	4313497	28123	5mSIPHEX1	64.3145	243158626	1.80872e+06	3.3891e+08	78.5696	3.23121e-07	32.3121
		SIP1_5_Bin10	5mSIPHEX1_10_scaffold_538_c1	5mSIPHEX1	4313497	22562	5mSIPHEX1	52.2638	243158626	1.17918e+06	3.3891e+08	78.5696	3.23121e-07	32.3121
		SIP1_5_Bin10	5mSIPHEX1_10_scaffold_650_c1	5mSIPHEX1	4313497	18285	5mSIPHEX1	79.7145	243158626	1.45758e+06	3.3891e+08	78.5696	3.23121e-07	32.3121
		SIP1_5_Bin10	5mSIPHEX1_10_scaffold_523_c2	5mSIPHEX1	4313497	16108	5mSIPHEX1	59.6194	243158626	960349	3.3891e+08	78.5696	3.23121e-07	32.3121
		SIP1_5_Bin10	5mSIPHEX1_10_scaffold_801_c1	5mSIPHEX1	4313497	14685	5mSIPHEX1	70.9759	243158626	1.04228e+06	3.3891e+08	78.5696	3.23121e-07	32.3121
		SIP1_5_Bin10	5mSIPHEX1_10_scaffold_940_c1	5mSIPHEX1	4313497	12264	5mSIPHEX1	17.3596	243158626	212898	3.3891e+08	78.5696	3.23121e-07	32.3121
		SIP1_5_Bin10	5mSIPHEX1_10_scaffold_1043_c1	5mSIPHEX1	4313497	10824	5mSIPHEX1	200.85	243158626	2.174e+06	3.3891e+08	78.5696	3.23121e-07	32.3121
		SIP1_5_Bin10	5mSIPHEX1_10_scaffold_1591_c1	5mSIPHEX1	4313497	7096	5mSIPHEX1	74.7318	243158626	530297	3.3891e+08	78.5696	3.23121e-07	32.3121
		SIP1_5_Bin10	5mSIPHEX1_10_scaffold_2165_c1	5mSIPHEX1	4313497	5349	5mSIPHEX1	65.1139	243158626	348294	3.3891e+08	78.5696	3.23121e-07	32.3121
		SIP1_5_Bin10	5mSIPHEX1_10_scaffold_2732_c1	5mSIPHEX1	4313497	4417	5mSIPHEX1	68.2032	243158626	301254	3.3891e+08	78.5696	3.23121e-07	32.3121
		SIP1_5_Bin10	5mSIPHEX1_10_scaffold_2920_c1	5mSIPHEX1	4313497	4186	5mSIPHEX1	57.3702	243158626	240152	3.3891e+08	78.5696	3.23121e-07	32.3121
		SIP1_5_Bin10	5mSIPHEX1_10_scaffold_3799_c1	5mSIPHEX1	4313497	3436	5mSIPHEX1	44.7985	243158626	153928	3.3891e+08	78.5696	3.23121e-07	32.3121
		SIP_5_Bin19	5mSIPHEX1_19_scaffold_15_c1	5mSIPHEX1	3431868	379976	5mSIPHEX1	2196.85	243158626	8.3475e+08	7.26342e+09	2116.46	8.70404e-06	870.404
		SIP_5_Bin19	5mSIPHEX1_19_scaffold_25_c1	5mSIPHEX1	3431868	306328	5mSIPHEX1	2151.09	243158626	6.58939e+08	7.26342e+09	2116.46	8.70404e-06	870.404
		SIP_5_Bin19	5mSIPHEX1_19_scaffold_21_c1	5mSIPHEX1	3431868	238013	5mSIPHEX1	1998.65	243158626	4.75705e+08	7.26342e+09	2116.46	8.70404e-06	870.404
		SIP_5_Bin19	5mSIPHEX1_19_scaffold_48_c1	5mSIPHEX1	3431868	234955	5mSIPHEX1	2123.17	243158626	4.98849e+08	7.26342e+09	2116.46	8.70404e-06	870.404
		SIP_5_Bin19	5mSIPHEX1_19_scaffold_55_c1	5mSIPHEX1	3431868	213691	5mSIPHEX1	1780.49	243158626	3.80475e+08	7.26342e+09	2116.46	8.70404e-06	870.404
		SIP_5_Bin19	5mSIPHEX1_19_scaffold_59_c1	5mSIPHEX1	3431868	206392	5mSIPHEX1	2545.25	243158626	525319238	7.26342e+09	2116.46	8.70404e-06	870.404
		SIP_5_Bin19	5mSIPHEX1_19_scaffold_69_c1	5mSIPHEX1	3431868	172867	5mSIPHEX1	2116.27	243158626	3.65833e+08	7.26342e+09	2116.46	8.70404e-06	870.404
		SIP_5_Bin19	5mSIPHEX1_19_scaffold_70_c1	5mSIPHEX1	3431868	172122	5mSIPHEX1	2224.83	243158626	3.82942e+08	7.26342e+09	2116.46	8.70404e-06	870.404
		SIP_5_Bin19	5mSIPHEX1_19_scaffold_73_c1	5mSIPHEX1	3431868	167494	5mSIPHEX1	2181.22	243158626	3.65341e+08	7.26342e+09	2116.46	8.70404e-06	870.404
		SIP_5_Bin19	5mSIPHEX1_19_scaffold_79_c1	5mSIPHEX1	3431868	156266	5mSIPHEX1	2291.42	243158626	3.58071e+08	7.26342e+09	2116.46	8.70404e-06	870.404
		SIP_5_Bin19	5mSIPHEX1_19_scaffold_90_c1	5mSIPHEX1	3431868	142685	5mSIPHEX1	2070.94	243158626	2.95492e+08	7.26342e+09	2116.46	8.70404e-06	870.404
		SIP_5_Bin19	5mSIPHEX1_19_scaffold_96_c1	5mSIPHEX1	3431868	133728	5mSIPHEX1	2113.16	243158626	2.82589e+08	7.26342e+09	2116.46	8.70404e-06	870.404
		SIP_5_Bin19	5mSIPHEX1_19_scaffold_104_c1	5mSIPHEX1	3431868	123919	5mSIPHEX1	2380.97	243158626	2.95047e+08	7.26342e+09	2116.46	8.70404e-06	870.404
		SIP_5_Bin19	5mSIPHEX1_19_scaffold_21_c2	5mSIPHEX1	3431868	119285	5mSIPHEX1	1987.81	243158626	2.37116e+08	7.26342e+09	2116.46	8.70404e-06	870.404
		SIP_5_Bin19	5mSIPHEX1_19_scaffold_158_c1	5mSIPHEX1	3431868	80867	5mSIPHEX1	2164.62	243158626	1.75046e+08	7.26342e+09	2116.46	8.70404e-06	870.404
		SIP_5_Bin19	5mSIPHEX1_19_scaffold_162_c1	5mSIPHEX1	3431868	78226	5mSIPHEX1	1774.5	243158626	138812037	7.26342e+09	2116.46	8.70404e-06	870.404
		SIP_5_Bin19	5mSIPHEX1_19_scaffold_175_c1	5mSIPHEX1	3431868	73094	5mSIPHEX1	1856.2	243158626	1.35677e+08	7.26342e+09	2116.46	8.70404e-06	870.404
		SIP_5_Bin19	5mSIPHEX1_19_scaffold_197_c1	5mSIPHEX1	3431868	66535	5mSIPHEX1	2045.85	243158626	1.36121e+08	7.26342e+09	2116.46	8.70404e-06	870.404
		SIP_5_Bin19	5mSIPHEX1_19_scaffold_201_c1	5mSIPHEX1	3431868	65606	5mSIPHEX1	1907.97	243158626	1.25174e+08	7.26342e+09	2116.46	8.70404e-06	870.404
		SIP_5_Bin19	5mSIPHEX1_19_scaffold_221_c1	5mSIPHEX1	3431868	59362	5mSIPHEX1	1931.32	243158626	1.14647e+08	7.26342e+09	2116.46	8.70404e-06	870.404
		SIP_5_Bin19	5mSIPHEX1_19_scaffold_228_c1	5mSIPHEX1	3431868	58017	5mSIPHEX1	2196.01	243158626	1.27406e+08	7.26342e+09	2116.46	8.70404e-06	870.404
		SIP_5_Bin19	5mSIPHEX1_19_scaffold_229_c1	5mSIPHEX1	3431868	57381	5mSIPHEX1	1908.54	243158626	1.09514e+08	7.26342e+09	2116.46	8.70404e-06	870.404
		SIP_5_Bin19	5mSIPHEX1_19_scaffold_244_c1	5mSIPHEX1	3431868	54731	5mSIPHEX1	1807.07	243158626	9.89027e+07	7.26342e+09	2116.46	8.70404e-06	870.404
		SIP_5_Bin19	5mSIPHEX1_19_scaffold_282_c1	5mSIPHEX1	3431868	47298	5mSIPHEX1	2152.53	243158626	1.0181e+08	7.26342e+09	2116.46	8.70404e-06	870.404
		SIP_5_Bin19	5mSIPHEX1_19_scaffold_733_c1	5mSIPHEX1	3431868	16193	5mSIPHEX1	1980.9	243158626	3.20767e+07	7.26342e+09	2116.46	8.70404e-06	870.404
		SIP_5_Bin19	5mSIPHEX1_19_scaffold_2613_c1	5mSIPHEX1	3431868	4570	5mSIPHEX1	1685.75	243158626	7.70388e+06	7.26342e+09	2116.46	8.70404e-06	870.404
		SIP_5_Bin19	5mSIPHEX1_19_scaffold_6696_c1	5mSIPHEX1	3431868	2267	5mSIPHEX1	1789.39	243158626	4.05655e+06	7.26342e+09	2116.46	8.70404e-06	870.404
		SIP_5_Bin15	5mSIPHEX1_15_scaffold_20_c1	5mSIPHEX1	3136236	360912	5mSIPHEX1	15.4275	243158626	5.56797e+06	4.51186e+07	14.3862	5.9164e-08	5.9164
		SIP_5_Bin15	5mSIPHEX1_15_scaffold_58_c1	5mSIPHEX1	3136236	206418	5mSIPHEX1	15.1167	243158626	3.12036e+06	4.51186e+07	14.3862	5.9164e-08	5.9164
		SIP_5_Bin15	5mSIPHEX1_15_scaffold_50_c1	5mSIPHEX1	3136236	186355	5mSIPHEX1	14.0703	243158626	2.62207e+06	4.51186e+07	14.3862	5.9164e-08	5.9164
		SIP_5_Bin15	5mSIPHEX1_15_scaffold_71_c1	5mSIPHEX1	3136236	169395	5mSIPHEX1	13.8121	243158626	2.3397e+06	4.51186e+07	14.3862	5.9164e-08	5.9164
		SIP_5_Bin15	5mSIPHEX1_15_scaffold_78_c1	5mSIPHEX1	3136236	157217	5mSIPHEX1	14.113	243158626	2.2188e+06	4.51186e+07	14.3862	5.9164e-08	5.9164
		SIP_5_Bin15	5mSIPHEX1_15_scaffold_91_c1	5mSIPHEX1	3136236	142566	5mSIPHEX1	14.9607	243158626	2.13289e+06	4.51186e+07	14.3862	5.9164e-08	5.9164
		SIP_5_Bin15	5mSIPHEX1_15_scaffold_64_c2	5mSIPHEX1	3136236	123832	5mSIPHEX1	14.3948	243158626	1.78254e+06	4.51186e+07	14.3862	5.9164e-08	5.9164
		SIP_5_Bin15	5mSIPHEX1_15_scaffold_105_c1	5mSIPHEX1	3136236	123764	5mSIPHEX1	13.8937	243158626	1.71954e+06	4.51186e+07	14.3862	5.9164e-08	5.9164
		SIP_5_Bin15	5mSIPHEX1_15_scaffold_106_c1	5mSIPHEX1	3136236	123629	5mSIPHEX1	15.1342	243158626	1.87103e+06	4.51186e+07	14.3862	5.9164e-08	5.9164
		SIP_5_Bin15	5mSIPHEX1_15_scaffold_85_c1	5mSIPHEX1	3136236	108361	5mSIPHEX1	12.5927	243158626	1.36456e+06	4.51186e+07	14.3862	5.9164e-08	5.9164
		SIP_5_Bin15	5mSIPHEX1_15_scaffold_121_c1	5mSIPHEX1	3136236	108115	5mSIPHEX1	13.9107	243158626	1.50396e+06	4.51186e+07	14.3862	5.9164e-08	5.9164
		SIP_5_Bin15	5mSIPHEX1_15_scaffold_143_c1	5mSIPHEX1	3136236	91796	5mSIPHEX1	15.4216	243158626	1.41564e+06	4.51186e+07	14.3862	5.9164e-08	5.9164
		SIP_5_Bin15	5mSIPHEX1_15_scaffold_161_c1	5mSIPHEX1	3136236	78639	5mSIPHEX1	14.2911	243158626	1.12384e+06	4.51186e+07	14.3862	5.9164e-08	5.9164
		SIP_5_Bin15	5mSIPHEX1_15_scaffold_170_c1	5mSIPHEX1	3136236	74900	5mSIPHEX1	14.1666	243158626	1.06108e+06	4.51186e+07	14.3862	5.9164e-08	5.9164
		SIP_5_Bin15	5mSIPHEX1_15_scaffold_179_c1	5mSIPHEX1	3136236	72322	5mSIPHEX1	14.7404	243158626	1.06606e+06	4.51186e+07	14.3862	5.9164e-08	5.9164
		SIP_5_Bin15	5mSIPHEX1_15_scaffold_64_c1	5mSIPHEX1	3136236	68050	5mSIPHEX1	14.6125	243158626	994381	4.51186e+07	14.3862	5.9164e-08	5.9164
		SIP_5_Bin15	5mSIPHEX1_15_scaffold_207_c1	5mSIPHEX1	3136236	62034	5mSIPHEX1	15.2972	243158626	948947	4.51186e+07	14.3862	5.9164e-08	5.9164
		SIP_5_Bin15	5mSIPHEX1_15_scaffold_208_c1	5mSIPHEX1	3136236	61599	5mSIPHEX1	13.3577	243158626	822821	4.51186e+07	14.3862	5.9164e-08	5.9164
		SIP_5_Bin15	5mSIPHEX1_15_scaffold_172_c2	5mSIPHEX1	3136236	59752	5mSIPHEX1	13.6784	243158626	817312	4.51186e+07	14.3862	5.9164e-08	5.9164
		SIP_5_Bin15	5mSIPHEX1_15_scaffold_225_c1	5mSIPHEX1	3136236	58725	5mSIPHEX1	13.6352	243158626	800727	4.51186e+07	14.3862	5.9164e-08	5.9164
		SIP_5_Bin15	5mSIPHEX1_15_scaffold_246_c1	5mSIPHEX1	3136236	54325	5mSIPHEX1	14.5078	243158626	788136	4.51186e+07	14.3862	5.9164e-08	5.9164
		SIP_5_Bin15	5mSIPHEX1_15_scaffold_275_c1	5mSIPHEX1	3136236	48842	5mSIPHEX1	15.8333	243158626	773330	4.51186e+07	14.3862	5.9164e-08	5.9164
		SIP_5_Bin15	5mSIPHEX1_15_scaffold_278_c1	5mSIPHEX1	3136236	47658	5mSIPHEX1	12.6866	243158626	604618	4.51186e+07	14.3862	5.9164e-08	5.9164
		SIP_5_Bin15	5mSIPHEX1_15_scaffold_287_c1	5mSIPHEX1	3136236	46856	5mSIPHEX1	13.9247	243158626	652456	4.51186e+07	14.3862	5.9164e-08	5.9164
		SIP_5_Bin15	5mSIPHEX1_15_scaffold_291_c1	5mSIPHEX1	3136236	45891	5mSIPHEX1	14.2302	243158626	653038	4.51186e+07	14.3862	5.9164e-08	5.9164
		SIP_5_Bin15	5mSIPHEX1_15_scaffold_50_c2	5mSIPHEX1	3136236	39663	5mSIPHEX1	13.2592	243158626	525900	4.51186e+07	14.3862	5.9164e-08	5.9164
		SIP_5_Bin15	5mSIPHEX1_15_scaffold_85_c2	5mSIPHEX1	3136236	37961	5mSIPHEX1	12.2974	243158626	466822	4.51186e+07	14.3862	5.9164e-08	5.9164
		SIP_5_Bin15	5mSIPHEX1_15_scaffold_348_c1	5mSIPHEX1	3136236	37254	5mSIPHEX1	14.568	243158626	542716	4.51186e+07	14.3862	5.9164e-08	5.9164
		SIP_5_Bin15	5mSIPHEX1_15_scaffold_380_c1	5mSIPHEX1	3136236	33603	5mSIPHEX1	11.689	243158626	392785	4.51186e+07	14.3862	5.9164e-08	5.9164
		SIP_5_Bin15	5mSIPHEX1_15_scaffold_387_c1	5mSIPHEX1	3136236	33137	5mSIPHEX1	14.811	243158626	490792	4.51186e+07	14.3862	5.9164e-08	5.9164
		SIP_5_Bin15	5mSIPHEX1_15_scaffold_389_c1	5mSIPHEX1	3136236	33066	5mSIPHEX1	12.8041	243158626	423380	4.51186e+07	14.3862	5.9164e-08	5.9164
		SIP_5_Bin15	5mSIPHEX1_15_scaffold_398_c1	5mSIPHEX1	3136236	32056	5mSIPHEX1	15.2124	243158626	487649	4.51186e+07	14.3862	5.9164e-08	5.9164
		SIP_5_Bin15	5mSIPHEX1_15_scaffold_451_c1	5mSIPHEX1	3136236	27087	5mSIPHEX1	12.8581	243158626	348287	4.51186e+07	14.3862	5.9164e-08	5.9164
		SIP_5_Bin15	5mSIPHEX1_15_scaffold_477_c1	5mSIPHEX1	3136236	25745	5mSIPHEX1	24.5252	243158626	631401	4.51186e+07	14.3862	5.9164e-08	5.9164
		SIP_5_Bin15	5mSIPHEX1_15_scaffold_564_c1	5mSIPHEX1	3136236	21289	5mSIPHEX1	16.21	243158626	345095	4.51186e+07	14.3862	5.9164e-08	5.9164
		SIP_5_Bin15	5mSIPHEX1_15_scaffold_737_c1	5mSIPHEX1	3136236	16075	5mSIPHEX1	12.5885	243158626	202360	4.51186e+07	14.3862	5.9164e-08	5.9164
		SIP_5_Bin15	5mSIPHEX1_15_scaffold_816_c1	5mSIPHEX1	3136236	14395	5mSIPHEX1	11.8928	243158626	171197	4.51186e+07	14.3862	5.9164e-08	5.9164
		SIP_5_Bin15	5mSIPHEX1_15_scaffold_830_c1	5mSIPHEX1	3136236	14128	5mSIPHEX1	13.1306	243158626	185509	4.51186e+07	14.3862	5.9164e-08	5.9164
		SIP_5_Bin15	5mSIPHEX1_15_scaffold_172_c1	5mSIPHEX1	3136236	13890	5mSIPHEX1	14.194	243158626	197155	4.51186e+07	14.3862	5.9164e-08	5.9164
		SIP_5_Bin15	5mSIPHEX1_15_scaffold_877_c1	5mSIPHEX1	3136236	13282	5mSIPHEX1	13.0809	243158626	173741	4.51186e+07	14.3862	5.9164e-08	5.9164
		SIP_5_Bin15	5mSIPHEX1_15_scaffold_971_c1	5mSIPHEX1	3136236	11734	5mSIPHEX1	14.1493	243158626	166028	4.51186e+07	14.3862	5.9164e-08	5.9164
		SIP_5_Bin15	5mSIPHEX1_15_scaffold_1064_c1	5mSIPHEX1	3136236	10651	5mSIPHEX1	15.7092	243158626	167319	4.51186e+07	14.3862	5.9164e-08	5.9164
		SIP_5_Bin15	5mSIPHEX1_15_scaffold_1325_c2	5mSIPHEX1	3136236	7615	5mSIPHEX1	8.0063	243158626	60968	4.51186e+07	14.3862	5.9164e-08	5.9164
		SIP_5_Bin15	5mSIPHEX1_15_scaffold_1519_c1	5mSIPHEX1	3136236	7490	5mSIPHEX1	14.1447	243158626	105944	4.51186e+07	14.3862	5.9164e-08	5.9164
		SIP_5_Bin15	5mSIPHEX1_15_scaffold_2041_c1	5mSIPHEX1	3136236	5582	5mSIPHEX1	9.23711	243158626	51561.5	4.51186e+07	14.3862	5.9164e-08	5.9164
		SIP_5_Bin15	5mSIPHEX1_15_scaffold_2108_c1	5mSIPHEX1	3136236	5451	5mSIPHEX1	12.1311	243158626	66126.6	4.51186e+07	14.3862	5.9164e-08	5.9164
		SIP_5_Bin15	5mSIPHEX1_15_scaffold_4654_c1	5mSIPHEX1	3136236	2967	5mSIPHEX1	8.17146	243158626	24244.7	4.51186e+07	14.3862	5.9164e-08	5.9164
		SIP_5_Bin15	5mSIPHEX1_15_scaffold_50_c3	5mSIPHEX1	3136236	2837	5mSIPHEX1	11.4239	243158626	32409.6	4.51186e+07	14.3862	5.9164e-08	5.9164
		SIP_5_Bin15	5mSIPHEX1_15_scaffold_5628_c1	5mSIPHEX1	3136236	2569	5mSIPHEX1	11.5597	243158626	29696.9	4.51186e+07	14.3862	5.9164e-08	5.9164
		SIP_5_Bin15	5mSIPHEX1_15_scaffold_6262_c1	5mSIPHEX1	3136236	2380	5mSIPHEX1	11.2466	243158626	26766.9	4.51186e+07	14.3862	5.9164e-08	5.9164
		SIP_5_Bin15	5mSIPHEX1_15_scaffold_6278_c1	5mSIPHEX1	3136236	2376	5mSIPHEX1	15.5768	243158626	37010.5	4.51186e+07	14.3862	5.9164e-08	5.9164
		SIP1_5_Bin18	5mSIPHEX1_18_scaffold_31_c1	5mSIPHEX1	2912263	289701	5mSIPHEX1	1562.36	243158626	4.52617e+08	4.30651e+09	1478.75	6.08143e-06	608.143
		SIP1_5_Bin18	5mSIPHEX1_18_scaffold_270_c1	5mSIPHEX1	2912263	46575	5mSIPHEX1	1858	243158626	86536350	4.30651e+09	1478.75	6.08143e-06	608.143
		SIP1_5_Bin18	5mSIPHEX1_18_scaffold_294_c1	5mSIPHEX1	2912263	45660	5mSIPHEX1	1766.34	243158626	8.06511e+07	4.30651e+09	1478.75	6.08143e-06	608.143
		SIP1_5_Bin18	5mSIPHEX1_18_scaffold_272_c2	5mSIPHEX1	2912263	42932	5mSIPHEX1	1649.35	243158626	7.08099e+07	4.30651e+09	1478.75	6.08143e-06	608.143
		SIP1_5_Bin18	5mSIPHEX1_18_scaffold_299_c2	5mSIPHEX1	2912263	42383	5mSIPHEX1	1586.91	243158626	6.7258e+07	4.30651e+09	1478.75	6.08143e-06	608.143
		SIP1_5_Bin18	5mSIPHEX1_18_scaffold_274_c2	5mSIPHEX1	2912263	38091	5mSIPHEX1	1517.57	243158626	5.78058e+07	4.30651e+09	1478.75	6.08143e-06	608.143
		SIP1_5_Bin18	5mSIPHEX1_18_scaffold_166_c4	5mSIPHEX1	2912263	37552	5mSIPHEX1	1449.3	243158626	5.44241e+07	4.30651e+09	1478.75	6.08143e-06	608.143
		SIP1_5_Bin18	5mSIPHEX1_18_scaffold_353_c1	5mSIPHEX1	2912263	36610	5mSIPHEX1	1552.84	243158626	5.68495e+07	4.30651e+09	1478.75	6.08143e-06	608.143
		SIP1_5_Bin18	5mSIPHEX1_18_scaffold_359_c1	5mSIPHEX1	2912263	35869	5mSIPHEX1	1448.72	243158626	5.19641e+07	4.30651e+09	1478.75	6.08143e-06	608.143
		SIP1_5_Bin18	5mSIPHEX1_18_scaffold_205_c4	5mSIPHEX1	2912263	34146	5mSIPHEX1	1466.41	243158626	5.0072e+07	4.30651e+09	1478.75	6.08143e-06	608.143
		SIP1_5_Bin18	5mSIPHEX1_18_scaffold_385_c1	5mSIPHEX1	2912263	33260	5mSIPHEX1	1279.07	243158626	4.25419e+07	4.30651e+09	1478.75	6.08143e-06	608.143
		SIP1_5_Bin18	5mSIPHEX1_18_scaffold_395_c1	5mSIPHEX1	2912263	32181	5mSIPHEX1	1471.14	243158626	4.73428e+07	4.30651e+09	1478.75	6.08143e-06	608.143
		SIP1_5_Bin18	5mSIPHEX1_18_scaffold_187_c1	5mSIPHEX1	2912263	31892	5mSIPHEX1	1475.74	243158626	4.70643e+07	4.30651e+09	1478.75	6.08143e-06	608.143
		SIP1_5_Bin18	5mSIPHEX1_18_scaffold_193_c2	5mSIPHEX1	2912263	30363	5mSIPHEX1	1892.13	243158626	5.74507e+07	4.30651e+09	1478.75	6.08143e-06	608.143
		SIP1_5_Bin18	5mSIPHEX1_18_scaffold_334_c1	5mSIPHEX1	2912263	29359	5mSIPHEX1	1659.63	243158626	4.87251e+07	4.30651e+09	1478.75	6.08143e-06	608.143
		SIP1_5_Bin18	5mSIPHEX1_18_scaffold_241_c3	5mSIPHEX1	2912263	27115	5mSIPHEX1	1371.17	243158626	3.71793e+07	4.30651e+09	1478.75	6.08143e-06	608.143
		SIP1_5_Bin18	5mSIPHEX1_18_scaffold_315_c2	5mSIPHEX1	2912263	26696	5mSIPHEX1	1863.3	243158626	4.97427e+07	4.30651e+09	1478.75	6.08143e-06	608.143
		SIP1_5_Bin18	5mSIPHEX1_18_scaffold_458_c1	5mSIPHEX1	2912263	26658	5mSIPHEX1	1226.5	243158626	32696037	4.30651e+09	1478.75	6.08143e-06	608.143
		SIP1_5_Bin18	5mSIPHEX1_18_scaffold_469_c1	5mSIPHEX1	2912263	26097	5mSIPHEX1	1880.89	243158626	4.90856e+07	4.30651e+09	1478.75	6.08143e-06	608.143
		SIP1_5_Bin18	5mSIPHEX1_18_scaffold_471_c1	5mSIPHEX1	2912263	26094	5mSIPHEX1	1597.2	243158626	4.16773e+07	4.30651e+09	1478.75	6.08143e-06	608.143
		SIP1_5_Bin18	5mSIPHEX1_18_scaffold_484_c1	5mSIPHEX1	2912263	25442	5mSIPHEX1	1706.1	243158626	4.34066e+07	4.30651e+09	1478.75	6.08143e-06	608.143
		SIP1_5_Bin18	5mSIPHEX1_18_scaffold_489_c1	5mSIPHEX1	2912263	25067	5mSIPHEX1	1779.96	243158626	4.46183e+07	4.30651e+09	1478.75	6.08143e-06	608.143
		SIP1_5_Bin18	5mSIPHEX1_18_scaffold_187_c3	5mSIPHEX1	2912263	24631	5mSIPHEX1	1791.73	243158626	4.41321e+07	4.30651e+09	1478.75	6.08143e-06	608.143
		SIP1_5_Bin18	5mSIPHEX1_18_scaffold_512_c1	5mSIPHEX1	2912263	24055	5mSIPHEX1	2108.39	243158626	5.07173e+07	4.30651e+09	1478.75	6.08143e-06	608.143
		SIP1_5_Bin18	5mSIPHEX1_18_scaffold_284_c1	5mSIPHEX1	2912263	23829	5mSIPHEX1	1386.02	243158626	3.30275e+07	4.30651e+09	1478.75	6.08143e-06	608.143
		SIP1_5_Bin18	5mSIPHEX1_18_scaffold_520_c1	5mSIPHEX1	2912263	23581	5mSIPHEX1	1746.55	243158626	4.11854e+07	4.30651e+09	1478.75	6.08143e-06	608.143
		SIP1_5_Bin18	5mSIPHEX1_18_scaffold_241_c2	5mSIPHEX1	2912263	22953	5mSIPHEX1	1472.4	243158626	3.3796e+07	4.30651e+09	1478.75	6.08143e-06	608.143
		SIP1_5_Bin18	5mSIPHEX1_18_scaffold_537_c1	5mSIPHEX1	2912263	22600	5mSIPHEX1	1372.43	243158626	31016918	4.30651e+09	1478.75	6.08143e-06	608.143
		SIP1_5_Bin18	5mSIPHEX1_18_scaffold_562_c1	5mSIPHEX1	2912263	21299	5mSIPHEX1	1219.64	243158626	2.59771e+07	4.30651e+09	1478.75	6.08143e-06	608.143
		SIP1_5_Bin18	5mSIPHEX1_18_scaffold_571_c1	5mSIPHEX1	2912263	21250	5mSIPHEX1	1734.87	243158626	3.6866e+07	4.30651e+09	1478.75	6.08143e-06	608.143
		SIP1_5_Bin18	5mSIPHEX1_18_scaffold_542_c1	5mSIPHEX1	2912263	19698	5mSIPHEX1	1464.09	243158626	2.88396e+07	4.30651e+09	1478.75	6.08143e-06	608.143
		SIP1_5_Bin18	5mSIPHEX1_18_scaffold_444_c2	5mSIPHEX1	2912263	19101	5mSIPHEX1	1726.69	243158626	3.29815e+07	4.30651e+09	1478.75	6.08143e-06	608.143
		SIP1_5_Bin18	5mSIPHEX1_18_scaffold_166_c2	5mSIPHEX1	2912263	18785	5mSIPHEX1	2014.02	243158626	3.78334e+07	4.30651e+09	1478.75	6.08143e-06	608.143
		SIP1_5_Bin18	5mSIPHEX1_18_scaffold_644_c1	5mSIPHEX1	2912263	18539	5mSIPHEX1	1486.52	243158626	2.75586e+07	4.30651e+09	1478.75	6.08143e-06	608.143
		SIP1_5_Bin18	5mSIPHEX1_18_scaffold_454_c2	5mSIPHEX1	2912263	18375	5mSIPHEX1	1155.29	243158626	2.12285e+07	4.30651e+09	1478.75	6.08143e-06	608.143
		SIP1_5_Bin18	5mSIPHEX1_18_scaffold_496_c2	5mSIPHEX1	2912263	18088	5mSIPHEX1	1507.47	243158626	2.72671e+07	4.30651e+09	1478.75	6.08143e-06	608.143
		SIP1_5_Bin18	5mSIPHEX1_18_scaffold_663_c1	5mSIPHEX1	2912263	17900	5mSIPHEX1	1195.25	243158626	21394975	4.30651e+09	1478.75	6.08143e-06	608.143
		SIP1_5_Bin18	5mSIPHEX1_18_scaffold_665_c1	5mSIPHEX1	2912263	17865	5mSIPHEX1	1709.36	243158626	3.05377e+07	4.30651e+09	1478.75	6.08143e-06	608.143
		SIP1_5_Bin18	5mSIPHEX1_18_scaffold_396_c2	5mSIPHEX1	2912263	17634	5mSIPHEX1	1577.57	243158626	2.78189e+07	4.30651e+09	1478.75	6.08143e-06	608.143
		SIP1_5_Bin18	5mSIPHEX1_18_scaffold_614_c1	5mSIPHEX1	2912263	17465	5mSIPHEX1	1094.68	243158626	1.91186e+07	4.30651e+09	1478.75	6.08143e-06	608.143
		SIP1_5_Bin18	5mSIPHEX1_18_scaffold_265_c3	5mSIPHEX1	2912263	17326	5mSIPHEX1	1452.98	243158626	2.51743e+07	4.30651e+09	1478.75	6.08143e-06	608.143
		SIP1_5_Bin18	5mSIPHEX1_18_scaffold_682_c1	5mSIPHEX1	2912263	17319	5mSIPHEX1	1549.73	243158626	2.68398e+07	4.30651e+09	1478.75	6.08143e-06	608.143
		SIP1_5_Bin18	5mSIPHEX1_18_scaffold_685_c1	5mSIPHEX1	2912263	17276	5mSIPHEX1	1745.14	243158626	3.0149e+07	4.30651e+09	1478.75	6.08143e-06	608.143
		SIP1_5_Bin18	5mSIPHEX1_18_scaffold_284_c2	5mSIPHEX1	2912263	16913	5mSIPHEX1	1495.13	243158626	2.52871e+07	4.30651e+09	1478.75	6.08143e-06	608.143
		SIP1_5_Bin18	5mSIPHEX1_18_scaffold_605_c2	5mSIPHEX1	2912263	16809	5mSIPHEX1	2045.96	243158626	3.43905e+07	4.30651e+09	1478.75	6.08143e-06	608.143
		SIP1_5_Bin18	5mSIPHEX1_18_scaffold_708_c1	5mSIPHEX1	2912263	16723	5mSIPHEX1	1245.14	243158626	2.08225e+07	4.30651e+09	1478.75	6.08143e-06	608.143
		SIP1_5_Bin18	5mSIPHEX1_18_scaffold_719_c1	5mSIPHEX1	2912263	16447	5mSIPHEX1	1251.63	243158626	2.05856e+07	4.30651e+09	1478.75	6.08143e-06	608.143
		SIP1_5_Bin18	5mSIPHEX1_18_scaffold_265_c4	5mSIPHEX1	2912263	16201	5mSIPHEX1	1536.42	243158626	2.48915e+07	4.30651e+09	1478.75	6.08143e-06	608.143
		SIP1_5_Bin18	5mSIPHEX1_18_scaffold_731_c1	5mSIPHEX1	2912263	16199	5mSIPHEX1	1762.74	243158626	2.85546e+07	4.30651e+09	1478.75	6.08143e-06	608.143
		SIP1_5_Bin18	5mSIPHEX1_18_scaffold_742_c1	5mSIPHEX1	2912263	16003	5mSIPHEX1	1301.59	243158626	2.08293e+07	4.30651e+09	1478.75	6.08143e-06	608.143
		SIP1_5_Bin18	5mSIPHEX1_18_scaffold_205_c1	5mSIPHEX1	2912263	15848	5mSIPHEX1	1077.84	243158626	1.70816e+07	4.30651e+09	1478.75	6.08143e-06	608.143
		SIP1_5_Bin18	5mSIPHEX1_18_scaffold_753_c1	5mSIPHEX1	2912263	15697	5mSIPHEX1	1519.94	243158626	2.38585e+07	4.30651e+09	1478.75	6.08143e-06	608.143
		SIP1_5_Bin18	5mSIPHEX1_18_scaffold_193_c5	5mSIPHEX1	2912263	15666	5mSIPHEX1	1388.9	243158626	2.17585e+07	4.30651e+09	1478.75	6.08143e-06	608.143
		SIP1_5_Bin18	5mSIPHEX1_18_scaffold_528_c1	5mSIPHEX1	2912263	15514	5mSIPHEX1	1120.26	243158626	1.73797e+07	4.30651e+09	1478.75	6.08143e-06	608.143
		SIP1_5_Bin18	5mSIPHEX1_18_scaffold_765_c1	5mSIPHEX1	2912263	15501	5mSIPHEX1	1371.67	243158626	2.12623e+07	4.30651e+09	1478.75	6.08143e-06	608.143
		SIP1_5_Bin18	5mSIPHEX1_18_scaffold_535_c3	5mSIPHEX1	2912263	14914	5mSIPHEX1	1576.54	243158626	2.35125e+07	4.30651e+09	1478.75	6.08143e-06	608.143
		SIP1_5_Bin18	5mSIPHEX1_18_scaffold_796_c1	5mSIPHEX1	2912263	14790	5mSIPHEX1	1503.39	243158626	2.22351e+07	4.30651e+09	1478.75	6.08143e-06	608.143
		SIP1_5_Bin18	5mSIPHEX1_18_scaffold_800_c1	5mSIPHEX1	2912263	14690	5mSIPHEX1	1207.4	243158626	17736706	4.30651e+09	1478.75	6.08143e-06	608.143
		SIP1_5_Bin18	5mSIPHEX1_18_scaffold_804_c1	5mSIPHEX1	2912263	14629	5mSIPHEX1	1225.57	243158626	1.79289e+07	4.30651e+09	1478.75	6.08143e-06	608.143
		SIP1_5_Bin18	5mSIPHEX1_18_scaffold_809_c1	5mSIPHEX1	2912263	14496	5mSIPHEX1	1587.9	243158626	2.30182e+07	4.30651e+09	1478.75	6.08143e-06	608.143
		SIP1_5_Bin18	5mSIPHEX1_18_scaffold_811_c1	5mSIPHEX1	2912263	14452	5mSIPHEX1	923.403	243158626	1.3345e+07	4.30651e+09	1478.75	6.08143e-06	608.143
		SIP1_5_Bin18	5mSIPHEX1_18_scaffold_822_c1	5mSIPHEX1	2912263	14284	5mSIPHEX1	1610.84	243158626	2.30092e+07	4.30651e+09	1478.75	6.08143e-06	608.143
		SIP1_5_Bin18	5mSIPHEX1_18_scaffold_828_c1	5mSIPHEX1	2912263	14179	5mSIPHEX1	990.488	243158626	1.40441e+07	4.30651e+09	1478.75	6.08143e-06	608.143
		SIP1_5_Bin18	5mSIPHEX1_18_scaffold_529_c2	5mSIPHEX1	2912263	14134	5mSIPHEX1	1117.32	243158626	1.57922e+07	4.30651e+09	1478.75	6.08143e-06	608.143
		SIP1_5_Bin18	5mSIPHEX1_18_scaffold_831_c1	5mSIPHEX1	2912263	14099	5mSIPHEX1	1765.48	243158626	2.48915e+07	4.30651e+09	1478.75	6.08143e-06	608.143
		SIP1_5_Bin18	5mSIPHEX1_18_scaffold_833_c1	5mSIPHEX1	2912263	14083	5mSIPHEX1	1984.3	243158626	2.79449e+07	4.30651e+09	1478.75	6.08143e-06	608.143
		SIP1_5_Bin18	5mSIPHEX1_18_scaffold_835_c1	5mSIPHEX1	2912263	14051	5mSIPHEX1	1246.8	243158626	1.75188e+07	4.30651e+09	1478.75	6.08143e-06	608.143
		SIP1_5_Bin18	5mSIPHEX1_18_scaffold_193_c1	5mSIPHEX1	2912263	13821	5mSIPHEX1	1920.01	243158626	2.65365e+07	4.30651e+09	1478.75	6.08143e-06	608.143
		SIP1_5_Bin18	5mSIPHEX1_18_scaffold_419_c3	5mSIPHEX1	2912263	13702	5mSIPHEX1	1470.17	243158626	2.01443e+07	4.30651e+09	1478.75	6.08143e-06	608.143
		SIP1_5_Bin18	5mSIPHEX1_18_scaffold_457_c3	5mSIPHEX1	2912263	13671	5mSIPHEX1	1689.37	243158626	2.30954e+07	4.30651e+09	1478.75	6.08143e-06	608.143
		SIP1_5_Bin18	5mSIPHEX1_18_scaffold_852_c1	5mSIPHEX1	2912263	13662	5mSIPHEX1	853.313	243158626	1.1658e+07	4.30651e+09	1478.75	6.08143e-06	608.143
		SIP1_5_Bin18	5mSIPHEX1_18_scaffold_579_c1	5mSIPHEX1	2912263	13632	5mSIPHEX1	2119.12	243158626	2.88878e+07	4.30651e+09	1478.75	6.08143e-06	608.143
		SIP1_5_Bin18	5mSIPHEX1_18_scaffold_856_c1	5mSIPHEX1	2912263	13602	5mSIPHEX1	1758.64	243158626	2.3921e+07	4.30651e+09	1478.75	6.08143e-06	608.143
		SIP1_5_Bin18	5mSIPHEX1_18_scaffold_862_c1	5mSIPHEX1	2912263	13511	5mSIPHEX1	1619.74	243158626	2.18843e+07	4.30651e+09	1478.75	6.08143e-06	608.143
		SIP1_5_Bin18	5mSIPHEX1_18_scaffold_769_c2	5mSIPHEX1	2912263	13493	5mSIPHEX1	1608.56	243158626	2.17043e+07	4.30651e+09	1478.75	6.08143e-06	608.143
		SIP1_5_Bin18	5mSIPHEX1_18_scaffold_187_c2	5mSIPHEX1	2912263	13390	5mSIPHEX1	1347.76	243158626	1.80465e+07	4.30651e+09	1478.75	6.08143e-06	608.143
		SIP1_5_Bin18	5mSIPHEX1_18_scaffold_166_c1	5mSIPHEX1	2912263	13274	5mSIPHEX1	1221.62	243158626	1.62158e+07	4.30651e+09	1478.75	6.08143e-06	608.143
		SIP1_5_Bin18	5mSIPHEX1_18_scaffold_880_c1	5mSIPHEX1	2912263	13170	5mSIPHEX1	1503.42	243158626	1.98e+07	4.30651e+09	1478.75	6.08143e-06	608.143
		SIP1_5_Bin18	5mSIPHEX1_18_scaffold_522_c2	5mSIPHEX1	2912263	12981	5mSIPHEX1	1309.85	243158626	1.70032e+07	4.30651e+09	1478.75	6.08143e-06	608.143
		SIP1_5_Bin18	5mSIPHEX1_18_scaffold_895_c1	5mSIPHEX1	2912263	12964	5mSIPHEX1	1072.87	243158626	1.39087e+07	4.30651e+09	1478.75	6.08143e-06	608.143
		SIP1_5_Bin18	5mSIPHEX1_18_scaffold_899_c1	5mSIPHEX1	2912263	12931	5mSIPHEX1	650.881	243158626	8.41654e+06	4.30651e+09	1478.75	6.08143e-06	608.143
		SIP1_5_Bin18	5mSIPHEX1_18_scaffold_924_c1	5mSIPHEX1	2912263	12534	5mSIPHEX1	1005.34	243158626	1.26009e+07	4.30651e+09	1478.75	6.08143e-06	608.143
		SIP1_5_Bin18	5mSIPHEX1_18_scaffold_937_c1	5mSIPHEX1	2912263	12306	5mSIPHEX1	782.704	243158626	9.63196e+06	4.30651e+09	1478.75	6.08143e-06	608.143
		SIP1_5_Bin18	5mSIPHEX1_18_scaffold_939_c1	5mSIPHEX1	2912263	12279	5mSIPHEX1	1763.46	243158626	2.16535e+07	4.30651e+09	1478.75	6.08143e-06	608.143
		SIP1_5_Bin18	5mSIPHEX1_18_scaffold_771_c2	5mSIPHEX1	2912263	11689	5mSIPHEX1	1955.15	243158626	2.28537e+07	4.30651e+09	1478.75	6.08143e-06	608.143
		SIP1_5_Bin18	5mSIPHEX1_18_scaffold_981_c1	5mSIPHEX1	2912263	11642	5mSIPHEX1	1018.3	243158626	1.1855e+07	4.30651e+09	1478.75	6.08143e-06	608.143
		SIP1_5_Bin18	5mSIPHEX1_18_scaffold_531_c1	5mSIPHEX1	2912263	11463	5mSIPHEX1	884.389	243158626	1.01378e+07	4.30651e+09	1478.75	6.08143e-06	608.143
		SIP1_5_Bin18	5mSIPHEX1_18_scaffold_998_c1	5mSIPHEX1	2912263	11446	5mSIPHEX1	1229.27	243158626	1.40702e+07	4.30651e+09	1478.75	6.08143e-06	608.143
		SIP1_5_Bin18	5mSIPHEX1_18_scaffold_531_c2	5mSIPHEX1	2912263	11386	5mSIPHEX1	1171.43	243158626	1.33379e+07	4.30651e+09	1478.75	6.08143e-06	608.143
		SIP1_5_Bin18	5mSIPHEX1_18_scaffold_1002_c1	5mSIPHEX1	2912263	11329	5mSIPHEX1	1429.29	243158626	1.61924e+07	4.30651e+09	1478.75	6.08143e-06	608.143
		SIP1_5_Bin18	5mSIPHEX1_18_scaffold_315_c1	5mSIPHEX1	2912263	11201	5mSIPHEX1	1771.19	243158626	1.98391e+07	4.30651e+09	1478.75	6.08143e-06	608.143
		SIP1_5_Bin18	5mSIPHEX1_18_scaffold_1029_c1	5mSIPHEX1	2912263	11006	5mSIPHEX1	1435.26	243158626	1.57965e+07	4.30651e+09	1478.75	6.08143e-06	608.143
		SIP1_5_Bin18	5mSIPHEX1_18_scaffold_1062_c1	5mSIPHEX1	2912263	10673	5mSIPHEX1	1330.89	243158626	1.42046e+07	4.30651e+09	1478.75	6.08143e-06	608.143
		SIP1_5_Bin18	5mSIPHEX1_18_scaffold_1085_c1	5mSIPHEX1	2912263	10444	5mSIPHEX1	1225.54	243158626	1.27995e+07	4.30651e+09	1478.75	6.08143e-06	608.143
		SIP1_5_Bin18	5mSIPHEX1_18_scaffold_1087_c1	5mSIPHEX1	2912263	10430	5mSIPHEX1	1290.26	243158626	1.34574e+07	4.30651e+09	1478.75	6.08143e-06	608.143
		SIP1_5_Bin18	5mSIPHEX1_18_scaffold_522_c1	5mSIPHEX1	2912263	10197	5mSIPHEX1	1217.36	243158626	1.24134e+07	4.30651e+09	1478.75	6.08143e-06	608.143
		SIP1_5_Bin18	5mSIPHEX1_18_scaffold_705_c2	5mSIPHEX1	2912263	10168	5mSIPHEX1	1671.06	243158626	1.69913e+07	4.30651e+09	1478.75	6.08143e-06	608.143
		SIP1_5_Bin18	5mSIPHEX1_18_scaffold_1132_c1	5mSIPHEX1	2912263	10063	5mSIPHEX1	1391.84	243158626	1.40061e+07	4.30651e+09	1478.75	6.08143e-06	608.143
		SIP1_5_Bin18	5mSIPHEX1_18_scaffold_1142_c1	5mSIPHEX1	2912263	10027	5mSIPHEX1	1436.09	243158626	1.43997e+07	4.30651e+09	1478.75	6.08143e-06	608.143
		SIP1_5_Bin18	5mSIPHEX1_18_scaffold_1164_c1	5mSIPHEX1	2912263	9810	5mSIPHEX1	1570.98	243158626	1.54113e+07	4.30651e+09	1478.75	6.08143e-06	608.143
		SIP1_5_Bin18	5mSIPHEX1_18_scaffold_1168_c1	5mSIPHEX1	2912263	9788	5mSIPHEX1	1503.68	243158626	1.4718e+07	4.30651e+09	1478.75	6.08143e-06	608.143
		SIP1_5_Bin18	5mSIPHEX1_18_scaffold_1173_c1	5mSIPHEX1	2912263	9712	5mSIPHEX1	1246.53	243158626	1.21063e+07	4.30651e+09	1478.75	6.08143e-06	608.143
		SIP1_5_Bin18	5mSIPHEX1_18_scaffold_1177_c1	5mSIPHEX1	2912263	9676	5mSIPHEX1	1474.68	243158626	1.4269e+07	4.30651e+09	1478.75	6.08143e-06	608.143
		SIP1_5_Bin18	5mSIPHEX1_18_scaffold_1197_c1	5mSIPHEX1	2912263	9499	5mSIPHEX1	1163.33	243158626	1.10505e+07	4.30651e+09	1478.75	6.08143e-06	608.143
		SIP1_5_Bin18	5mSIPHEX1_18_scaffold_1221_c1	5mSIPHEX1	2912263	9337	5mSIPHEX1	1541.48	243158626	1.43928e+07	4.30651e+09	1478.75	6.08143e-06	608.143
		SIP1_5_Bin18	5mSIPHEX1_18_scaffold_396_c3	5mSIPHEX1	2912263	9335	5mSIPHEX1	1356.24	243158626	1.26605e+07	4.30651e+09	1478.75	6.08143e-06	608.143
		SIP1_5_Bin18	5mSIPHEX1_18_scaffold_1223_c1	5mSIPHEX1	2912263	9331	5mSIPHEX1	1343.82	243158626	1.25392e+07	4.30651e+09	1478.75	6.08143e-06	608.143
		SIP1_5_Bin18	5mSIPHEX1_18_scaffold_1231_c1	5mSIPHEX1	2912263	9291	5mSIPHEX1	1970.65	243158626	1.83093e+07	4.30651e+09	1478.75	6.08143e-06	608.143
		SIP1_5_Bin18	5mSIPHEX1_18_scaffold_265_c2	5mSIPHEX1	2912263	9280	5mSIPHEX1	1065.86	243158626	9.89118e+06	4.30651e+09	1478.75	6.08143e-06	608.143
		SIP1_5_Bin18	5mSIPHEX1_18_scaffold_764_c2	5mSIPHEX1	2912263	9141	5mSIPHEX1	1576.59	243158626	1.44116e+07	4.30651e+09	1478.75	6.08143e-06	608.143
		SIP1_5_Bin18	5mSIPHEX1_18_scaffold_1264_c1	5mSIPHEX1	2912263	9041	5mSIPHEX1	1054.95	243158626	9.5378e+06	4.30651e+09	1478.75	6.08143e-06	608.143
		SIP1_5_Bin18	5mSIPHEX1_18_scaffold_1294_c1	5mSIPHEX1	2912263	8884	5mSIPHEX1	1227.37	243158626	1.0904e+07	4.30651e+09	1478.75	6.08143e-06	608.143
		SIP1_5_Bin18	5mSIPHEX1_18_scaffold_1305_c1	5mSIPHEX1	2912263	8803	5mSIPHEX1	1395.2	243158626	1.22819e+07	4.30651e+09	1478.75	6.08143e-06	608.143
		SIP1_5_Bin18	5mSIPHEX1_18_scaffold_529_c1	5mSIPHEX1	2912263	8795	5mSIPHEX1	1340.66	243158626	1.17911e+07	4.30651e+09	1478.75	6.08143e-06	608.143
		SIP1_5_Bin18	5mSIPHEX1_18_scaffold_1312_c1	5mSIPHEX1	2912263	8771	5mSIPHEX1	1272.25	243158626	1.11589e+07	4.30651e+09	1478.75	6.08143e-06	608.143
		SIP1_5_Bin18	5mSIPHEX1_18_scaffold_457_c1	5mSIPHEX1	2912263	8707	5mSIPHEX1	1581.15	243158626	1.37671e+07	4.30651e+09	1478.75	6.08143e-06	608.143
		SIP1_5_Bin18	5mSIPHEX1_18_scaffold_1320_c1	5mSIPHEX1	2912263	8692	5mSIPHEX1	1282.98	243158626	1.11517e+07	4.30651e+09	1478.75	6.08143e-06	608.143
		SIP1_5_Bin18	5mSIPHEX1_18_scaffold_551_c1	5mSIPHEX1	2912263	8621	5mSIPHEX1	1254.85	243158626	1.08181e+07	4.30651e+09	1478.75	6.08143e-06	608.143
		SIP1_5_Bin18	5mSIPHEX1_18_scaffold_1344_c1	5mSIPHEX1	2912263	8551	5mSIPHEX1	1495.45	243158626	1.27876e+07	4.30651e+09	1478.75	6.08143e-06	608.143
		SIP1_5_Bin18	5mSIPHEX1_18_scaffold_454_c1	5mSIPHEX1	2912263	8499	5mSIPHEX1	1205.23	243158626	1.02432e+07	4.30651e+09	1478.75	6.08143e-06	608.143
		SIP1_5_Bin18	5mSIPHEX1_18_scaffold_1373_c1	5mSIPHEX1	2912263	8394	5mSIPHEX1	1134.01	243158626	9.51888e+06	4.30651e+09	1478.75	6.08143e-06	608.143
		SIP1_5_Bin18	5mSIPHEX1_18_scaffold_1375_c1	5mSIPHEX1	2912263	8382	5mSIPHEX1	998.674	243158626	8.37089e+06	4.30651e+09	1478.75	6.08143e-06	608.143
		SIP1_5_Bin18	5mSIPHEX1_18_scaffold_991_c1	5mSIPHEX1	2912263	8366	5mSIPHEX1	1844.18	243158626	1.54284e+07	4.30651e+09	1478.75	6.08143e-06	608.143
		SIP1_5_Bin18	5mSIPHEX1_18_scaffold_1397_c1	5mSIPHEX1	2912263	8241	5mSIPHEX1	1195.71	243158626	9.85385e+06	4.30651e+09	1478.75	6.08143e-06	608.143
		SIP1_5_Bin18	5mSIPHEX1_18_scaffold_913_c2	5mSIPHEX1	2912263	8193	5mSIPHEX1	1120.55	243158626	9.18067e+06	4.30651e+09	1478.75	6.08143e-06	608.143
		SIP1_5_Bin18	5mSIPHEX1_18_scaffold_1418_c1	5mSIPHEX1	2912263	8072	5mSIPHEX1	830.327	243158626	6.7024e+06	4.30651e+09	1478.75	6.08143e-06	608.143
		SIP1_5_Bin18	5mSIPHEX1_18_scaffold_1243_c1	5mSIPHEX1	2912263	7941	5mSIPHEX1	1260.19	243158626	1.00072e+07	4.30651e+09	1478.75	6.08143e-06	608.143
		SIP1_5_Bin18	5mSIPHEX1_18_scaffold_1441_c1	5mSIPHEX1	2912263	7906	5mSIPHEX1	1012.27	243158626	8.00301e+06	4.30651e+09	1478.75	6.08143e-06	608.143
		SIP1_5_Bin18	5mSIPHEX1_18_scaffold_738_c3	5mSIPHEX1	2912263	7847	5mSIPHEX1	1544.26	243158626	1.21178e+07	4.30651e+09	1478.75	6.08143e-06	608.143
		SIP1_5_Bin18	5mSIPHEX1_18_scaffold_1475_c1	5mSIPHEX1	2912263	7713	5mSIPHEX1	1005.06	243158626	7.75203e+06	4.30651e+09	1478.75	6.08143e-06	608.143
		SIP1_5_Bin18	5mSIPHEX1_18_scaffold_265_c1	5mSIPHEX1	2912263	7704	5mSIPHEX1	1155.23	243158626	8.89989e+06	4.30651e+09	1478.75	6.08143e-06	608.143
		SIP1_5_Bin18	5mSIPHEX1_18_scaffold_1492_c1	5mSIPHEX1	2912263	7618	5mSIPHEX1	1120.27	243158626	8.53422e+06	4.30651e+09	1478.75	6.08143e-06	608.143
		SIP1_5_Bin18	5mSIPHEX1_18_scaffold_1522_c1	5mSIPHEX1	2912263	7476	5mSIPHEX1	1601.55	243158626	1.19732e+07	4.30651e+09	1478.75	6.08143e-06	608.143
		SIP1_5_Bin18	5mSIPHEX1_18_scaffold_528_c2	5mSIPHEX1	2912263	7436	5mSIPHEX1	998.295	243158626	7.42332e+06	4.30651e+09	1478.75	6.08143e-06	608.143
		SIP1_5_Bin18	5mSIPHEX1_18_scaffold_1540_c1	5mSIPHEX1	2912263	7412	5mSIPHEX1	1598.46	243158626	1.18478e+07	4.30651e+09	1478.75	6.08143e-06	608.143
		SIP1_5_Bin18	5mSIPHEX1_18_scaffold_1548_c1	5mSIPHEX1	2912263	7350	5mSIPHEX1	1409.31	243158626	1.03584e+07	4.30651e+09	1478.75	6.08143e-06	608.143
		SIP1_5_Bin18	5mSIPHEX1_18_scaffold_579_c2	5mSIPHEX1	2912263	7177	5mSIPHEX1	1257.53	243158626	9.02529e+06	4.30651e+09	1478.75	6.08143e-06	608.143
		SIP1_5_Bin18	5mSIPHEX1_18_scaffold_928_c1	5mSIPHEX1	2912263	7150	5mSIPHEX1	1669.01	243158626	1.19334e+07	4.30651e+09	1478.75	6.08143e-06	608.143
		SIP1_5_Bin18	5mSIPHEX1_18_scaffold_1598_c1	5mSIPHEX1	2912263	7054	5mSIPHEX1	2007.03	243158626	1.41576e+07	4.30651e+09	1478.75	6.08143e-06	608.143
		SIP1_5_Bin18	5mSIPHEX1_18_scaffold_419_c1	5mSIPHEX1	2912263	7016	5mSIPHEX1	1790.11	243158626	1.25594e+07	4.30651e+09	1478.75	6.08143e-06	608.143
		SIP1_5_Bin18	5mSIPHEX1_18_scaffold_272_c1	5mSIPHEX1	2912263	6967	5mSIPHEX1	998.998	243158626	6.96002e+06	4.30651e+09	1478.75	6.08143e-06	608.143
		SIP1_5_Bin18	5mSIPHEX1_18_scaffold_1626_c1	5mSIPHEX1	2912263	6938	5mSIPHEX1	1513.02	243158626	1.04973e+07	4.30651e+09	1478.75	6.08143e-06	608.143
		SIP1_5_Bin18	5mSIPHEX1_18_scaffold_1632_c1	5mSIPHEX1	2912263	6910	5mSIPHEX1	1601.42	243158626	1.10658e+07	4.30651e+09	1478.75	6.08143e-06	608.143
		SIP1_5_Bin18	5mSIPHEX1_18_scaffold_1341_c2	5mSIPHEX1	2912263	6759	5mSIPHEX1	1836.15	243158626	1.24105e+07	4.30651e+09	1478.75	6.08143e-06	608.143
		SIP1_5_Bin18	5mSIPHEX1_18_scaffold_705_c1	5mSIPHEX1	2912263	6573	5mSIPHEX1	1582.9	243158626	1.04044e+07	4.30651e+09	1478.75	6.08143e-06	608.143
		SIP1_5_Bin18	5mSIPHEX1_18_scaffold_1704_c1	5mSIPHEX1	2912263	6535	5mSIPHEX1	1360.53	243158626	8.89106e+06	4.30651e+09	1478.75	6.08143e-06	608.143
		SIP1_5_Bin18	5mSIPHEX1_18_scaffold_496_c1	5mSIPHEX1	2912263	6481	5mSIPHEX1	1335.49	243158626	8.65531e+06	4.30651e+09	1478.75	6.08143e-06	608.143
		SIP1_5_Bin18	5mSIPHEX1_18_scaffold_1722_c1	5mSIPHEX1	2912263	6459	5mSIPHEX1	1458.76	243158626	9.42213e+06	4.30651e+09	1478.75	6.08143e-06	608.143
		SIP1_5_Bin18	5mSIPHEX1_18_scaffold_1741_c1	5mSIPHEX1	2912263	6412	5mSIPHEX1	1032.75	243158626	6621993	4.30651e+09	1478.75	6.08143e-06	608.143
		SIP1_5_Bin18	5mSIPHEX1_18_scaffold_1747_c1	5mSIPHEX1	2912263	6389	5mSIPHEX1	1150.56	243158626	7.35093e+06	4.30651e+09	1478.75	6.08143e-06	608.143
		SIP1_5_Bin18	5mSIPHEX1_18_scaffold_1780_c1	5mSIPHEX1	2912263	6299	5mSIPHEX1	1360.4	243158626	8.56916e+06	4.30651e+09	1478.75	6.08143e-06	608.143
		SIP1_5_Bin18	5mSIPHEX1_18_scaffold_764_c1	5mSIPHEX1	2912263	6273	5mSIPHEX1	1767.04	243158626	1.10846e+07	4.30651e+09	1478.75	6.08143e-06	608.143
		SIP1_5_Bin18	5mSIPHEX1_18_scaffold_1791_c1	5mSIPHEX1	2912263	6262	5mSIPHEX1	1272.12	243158626	7.96602e+06	4.30651e+09	1478.75	6.08143e-06	608.143
		SIP1_5_Bin18	5mSIPHEX1_18_scaffold_1797_c1	5mSIPHEX1	2912263	6240	5mSIPHEX1	1649.3	243158626	10291632	4.30651e+09	1478.75	6.08143e-06	608.143
		SIP1_5_Bin18	5mSIPHEX1_18_scaffold_1803_c1	5mSIPHEX1	2912263	6228	5mSIPHEX1	1358.89	243158626	8.46317e+06	4.30651e+09	1478.75	6.08143e-06	608.143
		SIP1_5_Bin18	5mSIPHEX1_18_scaffold_1810_c1	5mSIPHEX1	2912263	6219	5mSIPHEX1	1354.26	243158626	8.42214e+06	4.30651e+09	1478.75	6.08143e-06	608.143
		SIP1_5_Bin18	5mSIPHEX1_18_scaffold_284_c3	5mSIPHEX1	2912263	6203	5mSIPHEX1	1732.46	243158626	1.07464e+07	4.30651e+09	1478.75	6.08143e-06	608.143
		SIP1_5_Bin18	5mSIPHEX1_18_scaffold_1844_c1	5mSIPHEX1	2912263	6114	5mSIPHEX1	1998.94	243158626	1.22215e+07	4.30651e+09	1478.75	6.08143e-06	608.143
		SIP1_5_Bin18	5mSIPHEX1_18_scaffold_1891_c1	5mSIPHEX1	2912263	5952	5mSIPHEX1	1286.52	243158626	7.65737e+06	4.30651e+09	1478.75	6.08143e-06	608.143
		SIP1_5_Bin18	5mSIPHEX1_18_scaffold_1088_c1	5mSIPHEX1	2912263	5942	5mSIPHEX1	866.309	243158626	5.14761e+06	4.30651e+09	1478.75	6.08143e-06	608.143
		SIP1_5_Bin18	5mSIPHEX1_18_scaffold_274_c3	5mSIPHEX1	2912263	5901	5mSIPHEX1	1417.99	243158626	8.36756e+06	4.30651e+09	1478.75	6.08143e-06	608.143
		SIP1_5_Bin18	5mSIPHEX1_18_scaffold_1963_c1	5mSIPHEX1	2912263	5771	5mSIPHEX1	1426.11	243158626	8.23008e+06	4.30651e+09	1478.75	6.08143e-06	608.143
		SIP1_5_Bin18	5mSIPHEX1_18_scaffold_2001_c1	5mSIPHEX1	2912263	5672	5mSIPHEX1	1333.6	243158626	7.56418e+06	4.30651e+09	1478.75	6.08143e-06	608.143
		SIP1_5_Bin18	5mSIPHEX1_18_scaffold_925_c1	5mSIPHEX1	2912263	5417	5mSIPHEX1	994.826	243158626	5.38897e+06	4.30651e+09	1478.75	6.08143e-06	608.143
		SIP1_5_Bin18	5mSIPHEX1_18_scaffold_2146_c1	5mSIPHEX1	2912263	5378	5mSIPHEX1	1796.08	243158626	9.65932e+06	4.30651e+09	1478.75	6.08143e-06	608.143
		SIP1_5_Bin18	5mSIPHEX1_18_scaffold_1687_c2	5mSIPHEX1	2912263	5332	5mSIPHEX1	1712.8	243158626	9.13265e+06	4.30651e+09	1478.75	6.08143e-06	608.143
		SIP1_5_Bin18	5mSIPHEX1_18_scaffold_1315_c3	5mSIPHEX1	2912263	5326	5mSIPHEX1	1291.72	243158626	6.8797e+06	4.30651e+09	1478.75	6.08143e-06	608.143
		SIP1_5_Bin18	5mSIPHEX1_18_scaffold_205_c3	5mSIPHEX1	2912263	5265	5mSIPHEX1	1457.53	243158626	7.6739e+06	4.30651e+09	1478.75	6.08143e-06	608.143
		SIP1_5_Bin18	5mSIPHEX1_18_scaffold_2253_c1	5mSIPHEX1	2912263	5185	5mSIPHEX1	1443.27	243158626	7.48335e+06	4.30651e+09	1478.75	6.08143e-06	608.143
		SIP1_5_Bin18	5mSIPHEX1_18_scaffold_928_c2	5mSIPHEX1	2912263	5177	5mSIPHEX1	1467.37	243158626	7.59657e+06	4.30651e+09	1478.75	6.08143e-06	608.143
		SIP1_5_Bin18	5mSIPHEX1_18_scaffold_2292_c1	5mSIPHEX1	2912263	5126	5mSIPHEX1	1176.69	243158626	6.03171e+06	4.30651e+09	1478.75	6.08143e-06	608.143
		SIP1_5_Bin18	5mSIPHEX1_18_scaffold_2301_c1	5mSIPHEX1	2912263	5103	5mSIPHEX1	1460.72	243158626	7.45405e+06	4.30651e+09	1478.75	6.08143e-06	608.143
		SIP1_5_Bin18	5mSIPHEX1_18_scaffold_2371_c1	5mSIPHEX1	2912263	4987	5mSIPHEX1	1716.97	243158626	8.56253e+06	4.30651e+09	1478.75	6.08143e-06	608.143
		SIP1_5_Bin18	5mSIPHEX1_18_scaffold_2418_c1	5mSIPHEX1	2912263	4906	5mSIPHEX1	1550.2	243158626	7.60528e+06	4.30651e+09	1478.75	6.08143e-06	608.143
		SIP1_5_Bin18	5mSIPHEX1_18_scaffold_2430_c1	5mSIPHEX1	2912263	4885	5mSIPHEX1	1703.96	243158626	8.32384e+06	4.30651e+09	1478.75	6.08143e-06	608.143
		SIP1_5_Bin18	5mSIPHEX1_18_scaffold_2456_c1	5mSIPHEX1	2912263	4844	5mSIPHEX1	1449.54	243158626	7.02157e+06	4.30651e+09	1478.75	6.08143e-06	608.143
		SIP1_5_Bin18	5mSIPHEX1_18_scaffold_2455_c1	5mSIPHEX1	2912263	4844	5mSIPHEX1	867.8	243158626	4.20362e+06	4.30651e+09	1478.75	6.08143e-06	608.143
		SIP1_5_Bin18	5mSIPHEX1_18_scaffold_241_c1	5mSIPHEX1	2912263	4674	5mSIPHEX1	1385.4	243158626	6.47536e+06	4.30651e+09	1478.75	6.08143e-06	608.143
		SIP1_5_Bin18	5mSIPHEX1_18_scaffold_2576_c1	5mSIPHEX1	2912263	4641	5mSIPHEX1	1108.81	243158626	5.14599e+06	4.30651e+09	1478.75	6.08143e-06	608.143
		SIP1_5_Bin18	5mSIPHEX1_18_scaffold_205_c5	5mSIPHEX1	2912263	4632	5mSIPHEX1	1860.02	243158626	8.61561e+06	4.30651e+09	1478.75	6.08143e-06	608.143
		SIP1_5_Bin18	5mSIPHEX1_18_scaffold_444_c1	5mSIPHEX1	2912263	4579	5mSIPHEX1	1202.21	243158626	5.50492e+06	4.30651e+09	1478.75	6.08143e-06	608.143
		SIP1_5_Bin18	5mSIPHEX1_18_scaffold_2616_c1	5mSIPHEX1	2912263	4567	5mSIPHEX1	1670.15	243158626	7.62758e+06	4.30651e+09	1478.75	6.08143e-06	608.143
		SIP1_5_Bin18	5mSIPHEX1_18_scaffold_2640_c1	5mSIPHEX1	2912263	4526	5mSIPHEX1	825.473	243158626	3.73609e+06	4.30651e+09	1478.75	6.08143e-06	608.143
		SIP1_5_Bin18	5mSIPHEX1_18_scaffold_2696_c1	5mSIPHEX1	2912263	4453	5mSIPHEX1	1953.98	243158626	8.70107e+06	4.30651e+09	1478.75	6.08143e-06	608.143
		SIP1_5_Bin18	5mSIPHEX1_18_scaffold_193_c4	5mSIPHEX1	2912263	4433	5mSIPHEX1	1270.38	243158626	5.63159e+06	4.30651e+09	1478.75	6.08143e-06	608.143
		SIP1_5_Bin18	5mSIPHEX1_18_scaffold_913_c1	5mSIPHEX1	2912263	4417	5mSIPHEX1	1335.89	243158626	5.90063e+06	4.30651e+09	1478.75	6.08143e-06	608.143
		SIP1_5_Bin18	5mSIPHEX1_18_scaffold_535_c2	5mSIPHEX1	2912263	4354	5mSIPHEX1	1453.21	243158626	6.32728e+06	4.30651e+09	1478.75	6.08143e-06	608.143
		SIP1_5_Bin18	5mSIPHEX1_18_scaffold_2832_c1	5mSIPHEX1	2912263	4308	5mSIPHEX1	2079.08	243158626	8.95668e+06	4.30651e+09	1478.75	6.08143e-06	608.143
		SIP1_5_Bin18	5mSIPHEX1_18_scaffold_2843_c1	5mSIPHEX1	2912263	4296	5mSIPHEX1	1621.3	243158626	6.9651e+06	4.30651e+09	1478.75	6.08143e-06	608.143
		SIP1_5_Bin18	5mSIPHEX1_18_scaffold_2887_c1	5mSIPHEX1	2912263	4238	5mSIPHEX1	1481.29	243158626	6.27771e+06	4.30651e+09	1478.75	6.08143e-06	608.143
		SIP1_5_Bin18	5mSIPHEX1_18_scaffold_419_c4	5mSIPHEX1	2912263	4200	5mSIPHEX1	1301.17	243158626	5464914	4.30651e+09	1478.75	6.08143e-06	608.143
		SIP1_5_Bin18	5mSIPHEX1_18_scaffold_457_c2	5mSIPHEX1	2912263	4180	5mSIPHEX1	1136.89	243158626	4.7522e+06	4.30651e+09	1478.75	6.08143e-06	608.143
		SIP1_5_Bin18	5mSIPHEX1_18_scaffold_2938_c1	5mSIPHEX1	2912263	4171	5mSIPHEX1	1401.45	243158626	5.84545e+06	4.30651e+09	1478.75	6.08143e-06	608.143
		SIP1_5_Bin18	5mSIPHEX1_18_scaffold_738_c1	5mSIPHEX1	2912263	4161	5mSIPHEX1	1129.87	243158626	4.70139e+06	4.30651e+09	1478.75	6.08143e-06	608.143
		SIP1_5_Bin18	5mSIPHEX1_18_scaffold_2962_c1	5mSIPHEX1	2912263	4149	5mSIPHEX1	1181.5	243158626	4.90204e+06	4.30651e+09	1478.75	6.08143e-06	608.143
		SIP1_5_Bin18	5mSIPHEX1_18_scaffold_2981_c1	5mSIPHEX1	2912263	4135	5mSIPHEX1	1341.04	243158626	5.5452e+06	4.30651e+09	1478.75	6.08143e-06	608.143
		SIP1_5_Bin18	5mSIPHEX1_18_scaffold_3007_c1	5mSIPHEX1	2912263	4107	5mSIPHEX1	1491.65	243158626	6.12621e+06	4.30651e+09	1478.75	6.08143e-06	608.143
		SIP1_5_Bin18	5mSIPHEX1_18_scaffold_315_c3	5mSIPHEX1	2912263	4005	5mSIPHEX1	1475.17	243158626	5.90806e+06	4.30651e+09	1478.75	6.08143e-06	608.143
		SIP1_5_Bin18	5mSIPHEX1_18_scaffold_1811_c2	5mSIPHEX1	2912263	3993	5mSIPHEX1	879.538	243158626	3.512e+06	4.30651e+09	1478.75	6.08143e-06	608.143
		SIP1_5_Bin18	5mSIPHEX1_18_scaffold_1515_c2	5mSIPHEX1	2912263	3930	5mSIPHEX1	1252.78	243158626	4.92343e+06	4.30651e+09	1478.75	6.08143e-06	608.143
		SIP1_5_Bin18	5mSIPHEX1_18_scaffold_738_c2	5mSIPHEX1	2912263	3847	5mSIPHEX1	1171.34	243158626	4.50614e+06	4.30651e+09	1478.75	6.08143e-06	608.143
		SIP1_5_Bin18	5mSIPHEX1_18_scaffold_3364_c1	5mSIPHEX1	2912263	3762	5mSIPHEX1	775.153	243158626	2.91613e+06	4.30651e+09	1478.75	6.08143e-06	608.143
		SIP1_5_Bin18	5mSIPHEX1_18_scaffold_3408_c1	5mSIPHEX1	2912263	3721	5mSIPHEX1	1103.59	243158626	4.10646e+06	4.30651e+09	1478.75	6.08143e-06	608.143
		SIP1_5_Bin18	5mSIPHEX1_18_scaffold_3430_c1	5mSIPHEX1	2912263	3702	5mSIPHEX1	1549.43	243158626	5.73599e+06	4.30651e+09	1478.75	6.08143e-06	608.143
		SIP1_5_Bin18	5mSIPHEX1_18_scaffold_771_c1	5mSIPHEX1	2912263	3557	5mSIPHEX1	1664.92	243158626	5.92212e+06	4.30651e+09	1478.75	6.08143e-06	608.143
		SIP1_5_Bin18	5mSIPHEX1_18_scaffold_270_c2	5mSIPHEX1	2912263	3530	5mSIPHEX1	1285.84	243158626	4.53902e+06	4.30651e+09	1478.75	6.08143e-06	608.143
		SIP1_5_Bin18	5mSIPHEX1_18_scaffold_444_c3	5mSIPHEX1	2912263	3496	5mSIPHEX1	1437.79	243158626	5.02651e+06	4.30651e+09	1478.75	6.08143e-06	608.143
		SIP1_5_Bin18	5mSIPHEX1_18_scaffold_1515_c1	5mSIPHEX1	2912263	3483	5mSIPHEX1	1130.8	243158626	3.93858e+06	4.30651e+09	1478.75	6.08143e-06	608.143
		SIP1_5_Bin18	5mSIPHEX1_18_scaffold_274_c1	5mSIPHEX1	2912263	3475	5mSIPHEX1	1212.82	243158626	4.21455e+06	4.30651e+09	1478.75	6.08143e-06	608.143
		SIP1_5_Bin18	5mSIPHEX1_18_scaffold_1649_c1	5mSIPHEX1	2912263	3461	5mSIPHEX1	1570.42	243158626	5.43522e+06	4.30651e+09	1478.75	6.08143e-06	608.143
		SIP1_5_Bin18	5mSIPHEX1_18_scaffold_3816_c1	5mSIPHEX1	2912263	3424	5mSIPHEX1	1719.5	243158626	5887568	4.30651e+09	1478.75	6.08143e-06	608.143
		SIP1_5_Bin18	5mSIPHEX1_18_scaffold_3945_c1	5mSIPHEX1	2912263	3333	5mSIPHEX1	1455.5	243158626	4.85118e+06	4.30651e+09	1478.75	6.08143e-06	608.143
		SIP1_5_Bin18	5mSIPHEX1_18_scaffold_396_c4	5mSIPHEX1	2912263	3284	5mSIPHEX1	1278.98	243158626	4.20017e+06	4.30651e+09	1478.75	6.08143e-06	608.143
		SIP1_5_Bin18	5mSIPHEX1_18_scaffold_205_c2	5mSIPHEX1	2912263	3259	5mSIPHEX1	1138.01	243158626	3.70877e+06	4.30651e+09	1478.75	6.08143e-06	608.143
		SIP1_5_Bin18	5mSIPHEX1_18_scaffold_991_c2	5mSIPHEX1	2912263	3032	5mSIPHEX1	1640.01	243158626	4.97251e+06	4.30651e+09	1478.75	6.08143e-06	608.143
		SIP1_5_Bin18	5mSIPHEX1_18_scaffold_605_c1	5mSIPHEX1	2912263	2987	5mSIPHEX1	1773.11	243158626	5.29628e+06	4.30651e+09	1478.75	6.08143e-06	608.143
		SIP1_5_Bin18	5mSIPHEX1_18_scaffold_4774_c1	5mSIPHEX1	2912263	2916	5mSIPHEX1	1061.7	243158626	3.09592e+06	4.30651e+09	1478.75	6.08143e-06	608.143
		SIP1_5_Bin18	5mSIPHEX1_18_scaffold_193_c3	5mSIPHEX1	2912263	2859	5mSIPHEX1	1451.99	243158626	4.15124e+06	4.30651e+09	1478.75	6.08143e-06	608.143
		SIP1_5_Bin18	5mSIPHEX1_18_scaffold_4926_c1	5mSIPHEX1	2912263	2841	5mSIPHEX1	1537.05	243158626	4.36676e+06	4.30651e+09	1478.75	6.08143e-06	608.143
		SIP1_5_Bin18	5mSIPHEX1_18_scaffold_4992_c1	5mSIPHEX1	2912263	2815	5mSIPHEX1	1283.28	243158626	3.61243e+06	4.30651e+09	1478.75	6.08143e-06	608.143
		SIP1_5_Bin18	5mSIPHEX1_18_scaffold_5204_c1	5mSIPHEX1	2912263	2731	5mSIPHEX1	582.023	243158626	1.5895e+06	4.30651e+09	1478.75	6.08143e-06	608.143
		SIP1_5_Bin18	5mSIPHEX1_18_scaffold_5593_c1	5mSIPHEX1	2912263	2579	5mSIPHEX1	1504.09	243158626	3.87905e+06	4.30651e+09	1478.75	6.08143e-06	608.143
		SIP1_5_Bin18	5mSIPHEX1_18_scaffold_542_c2	5mSIPHEX1	2912263	2460	5mSIPHEX1	1195.17	243158626	2.94012e+06	4.30651e+09	1478.75	6.08143e-06	608.143
		SIP1_5_Bin18	5mSIPHEX1_18_scaffold_6080_c1	5mSIPHEX1	2912263	2432	5mSIPHEX1	957.566	243158626	2.3288e+06	4.30651e+09	1478.75	6.08143e-06	608.143
		SIP1_5_Bin18	5mSIPHEX1_18_scaffold_6209_c1	5mSIPHEX1	2912263	2395	5mSIPHEX1	1473.47	243158626	3.52896e+06	4.30651e+09	1478.75	6.08143e-06	608.143
		SIP1_5_Bin18	5mSIPHEX1_18_scaffold_419_c5	5mSIPHEX1	2912263	2340	5mSIPHEX1	1018.03	243158626	2.38219e+06	4.30651e+09	1478.75	6.08143e-06	608.143
		SIP1_5_Bin18	5mSIPHEX1_18_scaffold_6707_c1	5mSIPHEX1	2912263	2261	5mSIPHEX1	980.839	243158626	2.21768e+06	4.30651e+09	1478.75	6.08143e-06	608.143
		SIP1_5_Bin18	5mSIPHEX1_18_scaffold_1811_c1	5mSIPHEX1	2912263	2125	5mSIPHEX1	1233.04	243158626	2620210	4.30651e+09	1478.75	6.08143e-06	608.143
		SIP_5_Bin2	5mSIPHEX1_2_scaffold_34_c1	5mSIPHEX1	2677491	274942	5mSIPHEX1	122.835	243158626	3.37725e+07	2.76056e+08	103.103	4.24014e-07	42.4014
		SIP_5_Bin2	5mSIPHEX1_2_scaffold_35_c2	5mSIPHEX1	2677491	270387	5mSIPHEX1	98.8502	243158626	2.67278e+07	2.76056e+08	103.103	4.24014e-07	42.4014
		SIP_5_Bin2	5mSIPHEX1_2_scaffold_40_c1	5mSIPHEX1	2677491	266801	5mSIPHEX1	98.1282	243158626	2.61807e+07	2.76056e+08	103.103	4.24014e-07	42.4014
		SIP_5_Bin2	5mSIPHEX1_2_scaffold_22_c1	5mSIPHEX1	2677491	185233	5mSIPHEX1	100.092	243158626	1.85403e+07	2.76056e+08	103.103	4.24014e-07	42.4014
		SIP_5_Bin2	5mSIPHEX1_2_scaffold_65_c2	5mSIPHEX1	2677491	172905	5mSIPHEX1	110.087	243158626	1.90346e+07	2.76056e+08	103.103	4.24014e-07	42.4014
		SIP_5_Bin2	5mSIPHEX1_2_scaffold_19_c4	5mSIPHEX1	2677491	164387	5mSIPHEX1	108.303	243158626	1.78036e+07	2.76056e+08	103.103	4.24014e-07	42.4014
		SIP_5_Bin2	5mSIPHEX1_2_scaffold_39_c2	5mSIPHEX1	2677491	159184	5mSIPHEX1	87.2202	243158626	1.38841e+07	2.76056e+08	103.103	4.24014e-07	42.4014
		SIP_5_Bin2	5mSIPHEX1_2_scaffold_22_c2	5mSIPHEX1	2677491	150843	5mSIPHEX1	111.245	243158626	1.67805e+07	2.76056e+08	103.103	4.24014e-07	42.4014
		SIP_5_Bin2	5mSIPHEX1_2_scaffold_86_c1	5mSIPHEX1	2677491	146194	5mSIPHEX1	94.4253	243158626	1.38044e+07	2.76056e+08	103.103	4.24014e-07	42.4014
		SIP_5_Bin2	5mSIPHEX1_2_scaffold_39_c1	5mSIPHEX1	2677491	107963	5mSIPHEX1	92.4688	243158626	9.98321e+06	2.76056e+08	103.103	4.24014e-07	42.4014
		SIP_5_Bin2	5mSIPHEX1_2_scaffold_123_c1	5mSIPHEX1	2677491	105499	5mSIPHEX1	113.156	243158626	1.19378e+07	2.76056e+08	103.103	4.24014e-07	42.4014
		SIP_5_Bin2	5mSIPHEX1_2_scaffold_125_c1	5mSIPHEX1	2677491	102776	5mSIPHEX1	110.282	243158626	1.13343e+07	2.76056e+08	103.103	4.24014e-07	42.4014
		SIP_5_Bin2	5mSIPHEX1_2_scaffold_122_c2	5mSIPHEX1	2677491	86406	5mSIPHEX1	113.029	243158626	9.76638e+06	2.76056e+08	103.103	4.24014e-07	42.4014
		SIP_5_Bin2	5mSIPHEX1_2_scaffold_19_c1	5mSIPHEX1	2677491	74870	5mSIPHEX1	100.826	243158626	7.54884e+06	2.76056e+08	103.103	4.24014e-07	42.4014
		SIP_5_Bin2	5mSIPHEX1_2_scaffold_19_c3	5mSIPHEX1	2677491	73604	5mSIPHEX1	111.404	243158626	8.19978e+06	2.76056e+08	103.103	4.24014e-07	42.4014
		SIP_5_Bin2	5mSIPHEX1_2_scaffold_169_c2	5mSIPHEX1	2677491	61791	5mSIPHEX1	85.7663	243158626	5.29959e+06	2.76056e+08	103.103	4.24014e-07	42.4014
		SIP_5_Bin2	5mSIPHEX1_2_scaffold_235_c1	5mSIPHEX1	2677491	56070	5mSIPHEX1	95.8245	243158626	5.37288e+06	2.76056e+08	103.103	4.24014e-07	42.4014
		SIP_5_Bin2	5mSIPHEX1_2_scaffold_19_c2	5mSIPHEX1	2677491	52976	5mSIPHEX1	109.284	243158626	5.78943e+06	2.76056e+08	103.103	4.24014e-07	42.4014
		SIP_5_Bin2	5mSIPHEX1_2_scaffold_338_c1	5mSIPHEX1	2677491	38065	5mSIPHEX1	120.439	243158626	4.58451e+06	2.76056e+08	103.103	4.24014e-07	42.4014
		SIP_5_Bin2	5mSIPHEX1_2_scaffold_405_c1	5mSIPHEX1	2677491	31558	5mSIPHEX1	81.082	243158626	2.55879e+06	2.76056e+08	103.103	4.24014e-07	42.4014
		SIP_5_Bin2	5mSIPHEX1_2_scaffold_122_c1	5mSIPHEX1	2677491	20958	5mSIPHEX1	108.839	243158626	2.28105e+06	2.76056e+08	103.103	4.24014e-07	42.4014
		SIP_5_Bin2	5mSIPHEX1_2_scaffold_621_c1	5mSIPHEX1	2677491	19269	5mSIPHEX1	75.9877	243158626	1.46421e+06	2.76056e+08	103.103	4.24014e-07	42.4014
		SIP_5_Bin2	5mSIPHEX1_2_scaffold_65_c1	5mSIPHEX1	2677491	17893	5mSIPHEX1	93.1055	243158626	1.66594e+06	2.76056e+08	103.103	4.24014e-07	42.4014
		SIP_5_Bin2	5mSIPHEX1_2_scaffold_169_c1	5mSIPHEX1	2677491	13184	5mSIPHEX1	90.3345	243158626	1.19097e+06	2.76056e+08	103.103	4.24014e-07	42.4014
		SIP_5_Bin2	5mSIPHEX1_2_scaffold_946_c1	5mSIPHEX1	2677491	12177	5mSIPHEX1	12.9083	243158626	157184	2.76056e+08	103.103	4.24014e-07	42.4014
		SIP_5_Bin2	5mSIPHEX1_2_scaffold_989_c1	5mSIPHEX1	2677491	11556	5mSIPHEX1	34.0053	243158626	392965	2.76056e+08	103.103	4.24014e-07	42.4014
		SIP_5_Bin37	5mSIPHEX1_37_scaffold_14_c3	5mSIPHEX1	4467123	172143	5mSIPHEX1	176.916	243158626	3.04549e+07	7.24085e+08	162.092	6.6661e-07	66.661
		SIP_5_Bin37	5mSIPHEX1_37_scaffold_84_c1	5mSIPHEX1	4467123	149162	5mSIPHEX1	189.717	243158626	2.82986e+07	7.24085e+08	162.092	6.6661e-07	66.661
		SIP_5_Bin37	5mSIPHEX1_37_scaffold_87_c1	5mSIPHEX1	4467123	144794	5mSIPHEX1	186.615	243158626	2.70207e+07	7.24085e+08	162.092	6.6661e-07	66.661
		SIP_5_Bin37	5mSIPHEX1_37_scaffold_97_c1	5mSIPHEX1	4467123	133505	5mSIPHEX1	176.687	243158626	2.35886e+07	7.24085e+08	162.092	6.6661e-07	66.661
		SIP_5_Bin37	5mSIPHEX1_37_scaffold_99_c1	5mSIPHEX1	4467123	133284	5mSIPHEX1	170.857	243158626	2.27725e+07	7.24085e+08	162.092	6.6661e-07	66.661
		SIP_5_Bin37	5mSIPHEX1_37_scaffold_52_c2	5mSIPHEX1	4467123	127888	5mSIPHEX1	171.75	243158626	21964764	7.24085e+08	162.092	6.6661e-07	66.661
		SIP_5_Bin37	5mSIPHEX1_37_scaffold_77_c1	5mSIPHEX1	4467123	124151	5mSIPHEX1	180.451	243158626	2.24032e+07	7.24085e+08	162.092	6.6661e-07	66.661
		SIP_5_Bin37	5mSIPHEX1_37_scaffold_111_c1	5mSIPHEX1	4467123	121023	5mSIPHEX1	105.268	243158626	1.27398e+07	7.24085e+08	162.092	6.6661e-07	66.661
		SIP_5_Bin37	5mSIPHEX1_37_scaffold_51_c2	5mSIPHEX1	4467123	115058	5mSIPHEX1	184.372	243158626	2.12135e+07	7.24085e+08	162.092	6.6661e-07	66.661
		SIP_5_Bin37	5mSIPHEX1_37_scaffold_120_c1	5mSIPHEX1	4467123	108620	5mSIPHEX1	199.705	243158626	2.1692e+07	7.24085e+08	162.092	6.6661e-07	66.661
		SIP_5_Bin37	5mSIPHEX1_37_scaffold_114_c2	5mSIPHEX1	4467123	98720	5mSIPHEX1	176.699	243158626	1.74437e+07	7.24085e+08	162.092	6.6661e-07	66.661
		SIP_5_Bin37	5mSIPHEX1_37_scaffold_82_c2	5mSIPHEX1	4467123	97664	5mSIPHEX1	195.808	243158626	1.91234e+07	7.24085e+08	162.092	6.6661e-07	66.661
		SIP_5_Bin37	5mSIPHEX1_37_scaffold_51_c1	5mSIPHEX1	4467123	92964	5mSIPHEX1	186.735	243158626	1.73596e+07	7.24085e+08	162.092	6.6661e-07	66.661
		SIP_5_Bin37	5mSIPHEX1_37_scaffold_52_c1	5mSIPHEX1	4467123	92633	5mSIPHEX1	180.357	243158626	1.6707e+07	7.24085e+08	162.092	6.6661e-07	66.661
		SIP_5_Bin37	5mSIPHEX1_37_scaffold_14_c5	5mSIPHEX1	4467123	88477	5mSIPHEX1	179.876	243158626	1.59149e+07	7.24085e+08	162.092	6.6661e-07	66.661
		SIP_5_Bin37	5mSIPHEX1_37_scaffold_153_c1	5mSIPHEX1	4467123	83834	5mSIPHEX1	97.798	243158626	8.1988e+06	7.24085e+08	162.092	6.6661e-07	66.661
		SIP_5_Bin37	5mSIPHEX1_37_scaffold_89_c2	5mSIPHEX1	4467123	83032	5mSIPHEX1	159.931	243158626	1.32794e+07	7.24085e+08	162.092	6.6661e-07	66.661
		SIP_5_Bin37	5mSIPHEX1_37_scaffold_156_c1	5mSIPHEX1	4467123	82793	5mSIPHEX1	79.0189	243158626	6.54221e+06	7.24085e+08	162.092	6.6661e-07	66.661
		SIP_5_Bin37	5mSIPHEX1_37_scaffold_176_c1	5mSIPHEX1	4467123	72869	5mSIPHEX1	179.237	243158626	1.30608e+07	7.24085e+08	162.092	6.6661e-07	66.661
		SIP_5_Bin37	5mSIPHEX1_37_scaffold_107_c1	5mSIPHEX1	4467123	68984	5mSIPHEX1	140.621	243158626	9.7006e+06	7.24085e+08	162.092	6.6661e-07	66.661
		SIP_5_Bin37	5mSIPHEX1_37_scaffold_14_c4	5mSIPHEX1	4467123	65165	5mSIPHEX1	158.167	243158626	1.0307e+07	7.24085e+08	162.092	6.6661e-07	66.661
		SIP_5_Bin37	5mSIPHEX1_37_scaffold_89_c1	5mSIPHEX1	4467123	60873	5mSIPHEX1	160.673	243158626	9.78065e+06	7.24085e+08	162.092	6.6661e-07	66.661
		SIP_5_Bin37	5mSIPHEX1_37_scaffold_231_c1	5mSIPHEX1	4467123	57085	5mSIPHEX1	180.194	243158626	1.02864e+07	7.24085e+08	162.092	6.6661e-07	66.661
		SIP_5_Bin37	5mSIPHEX1_37_scaffold_236_c1	5mSIPHEX1	4467123	56005	5mSIPHEX1	166.959	243158626	9.35054e+06	7.24085e+08	162.092	6.6661e-07	66.661
		SIP_5_Bin37	5mSIPHEX1_37_scaffold_107_c2	5mSIPHEX1	4467123	53347	5mSIPHEX1	147.993	243158626	7.89498e+06	7.24085e+08	162.092	6.6661e-07	66.661
		SIP_5_Bin37	5mSIPHEX1_37_scaffold_249_c1	5mSIPHEX1	4467123	53270	5mSIPHEX1	142.982	243158626	7.61665e+06	7.24085e+08	162.092	6.6661e-07	66.661
		SIP_5_Bin37	5mSIPHEX1_37_scaffold_14_c1	5mSIPHEX1	4467123	52624	5mSIPHEX1	186.549	243158626	9.81695e+06	7.24085e+08	162.092	6.6661e-07	66.661
		SIP_5_Bin37	5mSIPHEX1_37_scaffold_254_c1	5mSIPHEX1	4467123	52522	5mSIPHEX1	124.919	243158626	6.561e+06	7.24085e+08	162.092	6.6661e-07	66.661
		SIP_5_Bin37	5mSIPHEX1_37_scaffold_263_c1	5mSIPHEX1	4467123	51261	5mSIPHEX1	161.849	243158626	8.29654e+06	7.24085e+08	162.092	6.6661e-07	66.661
		SIP_5_Bin37	5mSIPHEX1_37_scaffold_159_c2	5mSIPHEX1	4467123	48733	5mSIPHEX1	202.702	243158626	9.87828e+06	7.24085e+08	162.092	6.6661e-07	66.661
		SIP_5_Bin37	5mSIPHEX1_37_scaffold_186_c1	5mSIPHEX1	4467123	47357	5mSIPHEX1	165.452	243158626	7.83531e+06	7.24085e+08	162.092	6.6661e-07	66.661
		SIP_5_Bin37	5mSIPHEX1_37_scaffold_283_c1	5mSIPHEX1	4467123	47295	5mSIPHEX1	92.4825	243158626	4.37396e+06	7.24085e+08	162.092	6.6661e-07	66.661
		SIP_5_Bin37	5mSIPHEX1_37_scaffold_245_c1	5mSIPHEX1	4467123	43222	5mSIPHEX1	164.753	243158626	7.12095e+06	7.24085e+08	162.092	6.6661e-07	66.661
		SIP_5_Bin37	5mSIPHEX1_37_scaffold_308_c1	5mSIPHEX1	4467123	43159	5mSIPHEX1	120.733	243158626	5.21072e+06	7.24085e+08	162.092	6.6661e-07	66.661
		SIP_5_Bin37	5mSIPHEX1_37_scaffold_240_c2	5mSIPHEX1	4467123	42811	5mSIPHEX1	159.708	243158626	6.83726e+06	7.24085e+08	162.092	6.6661e-07	66.661
		SIP_5_Bin37	5mSIPHEX1_37_scaffold_323_c1	5mSIPHEX1	4467123	40234	5mSIPHEX1	160.482	243158626	6.45683e+06	7.24085e+08	162.092	6.6661e-07	66.661
		SIP_5_Bin37	5mSIPHEX1_37_scaffold_206_c3	5mSIPHEX1	4467123	39471	5mSIPHEX1	139.298	243158626	5.49823e+06	7.24085e+08	162.092	6.6661e-07	66.661
		SIP_5_Bin37	5mSIPHEX1_37_scaffold_333_c1	5mSIPHEX1	4467123	38720	5mSIPHEX1	121.618	243158626	4.70905e+06	7.24085e+08	162.092	6.6661e-07	66.661
		SIP_5_Bin37	5mSIPHEX1_37_scaffold_77_c2	5mSIPHEX1	4467123	35759	5mSIPHEX1	172.399	243158626	6.16482e+06	7.24085e+08	162.092	6.6661e-07	66.661
		SIP_5_Bin37	5mSIPHEX1_37_scaffold_140_c5	5mSIPHEX1	4467123	33311	5mSIPHEX1	207.75	243158626	6.92036e+06	7.24085e+08	162.092	6.6661e-07	66.661
		SIP_5_Bin37	5mSIPHEX1_37_scaffold_160_c2	5mSIPHEX1	4467123	33295	5mSIPHEX1	167.559	243158626	5.57888e+06	7.24085e+08	162.092	6.6661e-07	66.661
		SIP_5_Bin37	5mSIPHEX1_37_scaffold_160_c1	5mSIPHEX1	4467123	33092	5mSIPHEX1	167.233	243158626	5.53407e+06	7.24085e+08	162.092	6.6661e-07	66.661
		SIP_5_Bin37	5mSIPHEX1_37_scaffold_82_c1	5mSIPHEX1	4467123	32854	5mSIPHEX1	214.296	243158626	7.04048e+06	7.24085e+08	162.092	6.6661e-07	66.661
		SIP_5_Bin37	5mSIPHEX1_37_scaffold_393_c1	5mSIPHEX1	4467123	32400	5mSIPHEX1	166.883	243158626	5.40701e+06	7.24085e+08	162.092	6.6661e-07	66.661
		SIP_5_Bin37	5mSIPHEX1_37_scaffold_397_c1	5mSIPHEX1	4467123	32074	5mSIPHEX1	79.847	243158626	2.56101e+06	7.24085e+08	162.092	6.6661e-07	66.661
		SIP_5_Bin37	5mSIPHEX1_37_scaffold_399_c1	5mSIPHEX1	4467123	32052	5mSIPHEX1	166.014	243158626	5.32108e+06	7.24085e+08	162.092	6.6661e-07	66.661
		SIP_5_Bin37	5mSIPHEX1_37_scaffold_401_c1	5mSIPHEX1	4467123	31882	5mSIPHEX1	163.328	243158626	5.20722e+06	7.24085e+08	162.092	6.6661e-07	66.661
		SIP_5_Bin37	5mSIPHEX1_37_scaffold_159_c1	5mSIPHEX1	4467123	31626	5mSIPHEX1	240.682	243158626	7.61181e+06	7.24085e+08	162.092	6.6661e-07	66.661
		SIP_5_Bin37	5mSIPHEX1_37_scaffold_408_c1	5mSIPHEX1	4467123	31309	5mSIPHEX1	155.474	243158626	4.86774e+06	7.24085e+08	162.092	6.6661e-07	66.661
		SIP_5_Bin37	5mSIPHEX1_37_scaffold_195_c3	5mSIPHEX1	4467123	28569	5mSIPHEX1	221.489	243158626	6.32772e+06	7.24085e+08	162.092	6.6661e-07	66.661
		SIP_5_Bin37	5mSIPHEX1_37_scaffold_428_c1	5mSIPHEX1	4467123	28531	5mSIPHEX1	93.8038	243158626	2.67632e+06	7.24085e+08	162.092	6.6661e-07	66.661
		SIP_5_Bin37	5mSIPHEX1_37_scaffold_295_c2	5mSIPHEX1	4467123	28131	5mSIPHEX1	182.064	243158626	5.12164e+06	7.24085e+08	162.092	6.6661e-07	66.661
		SIP_5_Bin37	5mSIPHEX1_37_scaffold_441_c1	5mSIPHEX1	4467123	27500	5mSIPHEX1	195.738	243158626	5382795	7.24085e+08	162.092	6.6661e-07	66.661
		SIP_5_Bin37	5mSIPHEX1_37_scaffold_448_c1	5mSIPHEX1	4467123	27251	5mSIPHEX1	81.3828	243158626	2.21776e+06	7.24085e+08	162.092	6.6661e-07	66.661
		SIP_5_Bin37	5mSIPHEX1_37_scaffold_453_c1	5mSIPHEX1	4467123	27021	5mSIPHEX1	165.617	243158626	4.47514e+06	7.24085e+08	162.092	6.6661e-07	66.661
		SIP_5_Bin37	5mSIPHEX1_37_scaffold_461_c1	5mSIPHEX1	4467123	26457	5mSIPHEX1	167.754	243158626	4.43827e+06	7.24085e+08	162.092	6.6661e-07	66.661
		SIP_5_Bin37	5mSIPHEX1_37_scaffold_464_c1	5mSIPHEX1	4467123	26273	5mSIPHEX1	158.46	243158626	4.16322e+06	7.24085e+08	162.092	6.6661e-07	66.661
		SIP_5_Bin37	5mSIPHEX1_37_scaffold_467_c1	5mSIPHEX1	4467123	26222	5mSIPHEX1	69.2928	243158626	1.817e+06	7.24085e+08	162.092	6.6661e-07	66.661
		SIP_5_Bin37	5mSIPHEX1_37_scaffold_470_c1	5mSIPHEX1	4467123	26094	5mSIPHEX1	200.11	243158626	5.22167e+06	7.24085e+08	162.092	6.6661e-07	66.661
		SIP_5_Bin37	5mSIPHEX1_37_scaffold_195_c2	5mSIPHEX1	4467123	25914	5mSIPHEX1	217.394	243158626	5.63355e+06	7.24085e+08	162.092	6.6661e-07	66.661
		SIP_5_Bin37	5mSIPHEX1_37_scaffold_476_c1	5mSIPHEX1	4467123	25893	5mSIPHEX1	165.547	243158626	4.28651e+06	7.24085e+08	162.092	6.6661e-07	66.661
		SIP_5_Bin37	5mSIPHEX1_37_scaffold_433_c2	5mSIPHEX1	4467123	25418	5mSIPHEX1	158.425	243158626	4.02685e+06	7.24085e+08	162.092	6.6661e-07	66.661
		SIP_5_Bin37	5mSIPHEX1_37_scaffold_410_c2	5mSIPHEX1	4467123	24987	5mSIPHEX1	167.988	243158626	4.19752e+06	7.24085e+08	162.092	6.6661e-07	66.661
		SIP_5_Bin37	5mSIPHEX1_37_scaffold_492_c1	5mSIPHEX1	4467123	24877	5mSIPHEX1	172.271	243158626	4.28559e+06	7.24085e+08	162.092	6.6661e-07	66.661
		SIP_5_Bin37	5mSIPHEX1_37_scaffold_82_c3	5mSIPHEX1	4467123	23927	5mSIPHEX1	176.968	243158626	4.23431e+06	7.24085e+08	162.092	6.6661e-07	66.661
		SIP_5_Bin37	5mSIPHEX1_37_scaffold_532_c1	5mSIPHEX1	4467123	22923	5mSIPHEX1	107.794	243158626	2.47096e+06	7.24085e+08	162.092	6.6661e-07	66.661
		SIP_5_Bin37	5mSIPHEX1_37_scaffold_186_c2	5mSIPHEX1	4467123	22860	5mSIPHEX1	176.741	243158626	4.0403e+06	7.24085e+08	162.092	6.6661e-07	66.661
		SIP_5_Bin37	5mSIPHEX1_37_scaffold_561_c1	5mSIPHEX1	4467123	21453	5mSIPHEX1	67.4668	243158626	1.44737e+06	7.24085e+08	162.092	6.6661e-07	66.661
		SIP_5_Bin37	5mSIPHEX1_37_scaffold_140_c1	5mSIPHEX1	4467123	20965	5mSIPHEX1	176.319	243158626	3.69653e+06	7.24085e+08	162.092	6.6661e-07	66.661
		SIP_5_Bin37	5mSIPHEX1_37_scaffold_114_c1	5mSIPHEX1	4467123	19754	5mSIPHEX1	171.75	243158626	3.39275e+06	7.24085e+08	162.092	6.6661e-07	66.661
		SIP_5_Bin37	5mSIPHEX1_37_scaffold_609_c1	5mSIPHEX1	4467123	19638	5mSIPHEX1	161.901	243158626	3.17941e+06	7.24085e+08	162.092	6.6661e-07	66.661
		SIP_5_Bin37	5mSIPHEX1_37_scaffold_611_c1	5mSIPHEX1	4467123	19589	5mSIPHEX1	37.5056	243158626	734697	7.24085e+08	162.092	6.6661e-07	66.661
		SIP_5_Bin37	5mSIPHEX1_37_scaffold_619_c1	5mSIPHEX1	4467123	19355	5mSIPHEX1	194.434	243158626	3.76327e+06	7.24085e+08	162.092	6.6661e-07	66.661
		SIP_5_Bin37	5mSIPHEX1_37_scaffold_620_c1	5mSIPHEX1	4467123	19329	5mSIPHEX1	126.102	243158626	2.43743e+06	7.24085e+08	162.092	6.6661e-07	66.661
		SIP_5_Bin37	5mSIPHEX1_37_scaffold_140_c4	5mSIPHEX1	4467123	18358	5mSIPHEX1	202.787	243158626	3.72276e+06	7.24085e+08	162.092	6.6661e-07	66.661
		SIP_5_Bin37	5mSIPHEX1_37_scaffold_654_c1	5mSIPHEX1	4467123	18113	5mSIPHEX1	154.3	243158626	2.79484e+06	7.24085e+08	162.092	6.6661e-07	66.661
		SIP_5_Bin37	5mSIPHEX1_37_scaffold_687_c1	5mSIPHEX1	4467123	17224	5mSIPHEX1	151.642	243158626	2.61188e+06	7.24085e+08	162.092	6.6661e-07	66.661
		SIP_5_Bin37	5mSIPHEX1_37_scaffold_51_c3	5mSIPHEX1	4467123	16206	5mSIPHEX1	167.66	243158626	2.7171e+06	7.24085e+08	162.092	6.6661e-07	66.661
		SIP_5_Bin37	5mSIPHEX1_37_scaffold_744_c1	5mSIPHEX1	4467123	15956	5mSIPHEX1	103.428	243158626	1.6503e+06	7.24085e+08	162.092	6.6661e-07	66.661
		SIP_5_Bin37	5mSIPHEX1_37_scaffold_755_c1	5mSIPHEX1	4467123	15632	5mSIPHEX1	91.6224	243158626	1.43224e+06	7.24085e+08	162.092	6.6661e-07	66.661
		SIP_5_Bin37	5mSIPHEX1_37_scaffold_140_c2	5mSIPHEX1	4467123	14395	5mSIPHEX1	191.085	243158626	2.75067e+06	7.24085e+08	162.092	6.6661e-07	66.661
		SIP_5_Bin37	5mSIPHEX1_37_scaffold_655_c1	5mSIPHEX1	4467123	14366	5mSIPHEX1	180.579	243158626	2.5942e+06	7.24085e+08	162.092	6.6661e-07	66.661
		SIP_5_Bin37	5mSIPHEX1_37_scaffold_206_c1	5mSIPHEX1	4467123	14213	5mSIPHEX1	139.171	243158626	1.97804e+06	7.24085e+08	162.092	6.6661e-07	66.661
		SIP_5_Bin37	5mSIPHEX1_37_scaffold_14_c2	5mSIPHEX1	4467123	14189	5mSIPHEX1	204.617	243158626	2.90331e+06	7.24085e+08	162.092	6.6661e-07	66.661
		SIP_5_Bin37	5mSIPHEX1_37_scaffold_160_c3	5mSIPHEX1	4467123	13789	5mSIPHEX1	166.675	243158626	2.29828e+06	7.24085e+08	162.092	6.6661e-07	66.661
		SIP_5_Bin37	5mSIPHEX1_37_scaffold_240_c1	5mSIPHEX1	4467123	12283	5mSIPHEX1	156.473	243158626	1.92196e+06	7.24085e+08	162.092	6.6661e-07	66.661
		SIP_5_Bin37	5mSIPHEX1_37_scaffold_960_c1	5mSIPHEX1	4467123	11936	5mSIPHEX1	195.803	243158626	2.3371e+06	7.24085e+08	162.092	6.6661e-07	66.661
		SIP_5_Bin37	5mSIPHEX1_37_scaffold_969_c1	5mSIPHEX1	4467123	11742	5mSIPHEX1	79.7042	243158626	935887	7.24085e+08	162.092	6.6661e-07	66.661
		SIP_5_Bin37	5mSIPHEX1_37_scaffold_245_c2	5mSIPHEX1	4467123	11044	5mSIPHEX1	151.039	243158626	1.66807e+06	7.24085e+08	162.092	6.6661e-07	66.661
		SIP_5_Bin37	5mSIPHEX1_37_scaffold_295_c3	5mSIPHEX1	4467123	10748	5mSIPHEX1	167.172	243158626	1.79676e+06	7.24085e+08	162.092	6.6661e-07	66.661
		SIP_5_Bin37	5mSIPHEX1_37_scaffold_1056_c1	5mSIPHEX1	4467123	10696	5mSIPHEX1	135.693	243158626	1.45137e+06	7.24085e+08	162.092	6.6661e-07	66.661
		SIP_5_Bin37	5mSIPHEX1_37_scaffold_1078_c1	5mSIPHEX1	4467123	10517	5mSIPHEX1	185.581	243158626	1.95176e+06	7.24085e+08	162.092	6.6661e-07	66.661
		SIP_5_Bin37	5mSIPHEX1_37_scaffold_1100_c1	5mSIPHEX1	4467123	10302	5mSIPHEX1	133.329	243158626	1.37356e+06	7.24085e+08	162.092	6.6661e-07	66.661
		SIP_5_Bin37	5mSIPHEX1_37_scaffold_1185_c1	5mSIPHEX1	4467123	9614	5mSIPHEX1	91.6301	243158626	880932	7.24085e+08	162.092	6.6661e-07	66.661
		SIP_5_Bin37	5mSIPHEX1_37_scaffold_1220_c1	5mSIPHEX1	4467123	9340	5mSIPHEX1	59.8827	243158626	559304	7.24085e+08	162.092	6.6661e-07	66.661
		SIP_5_Bin37	5mSIPHEX1_37_scaffold_1248_c1	5mSIPHEX1	4467123	9127	5mSIPHEX1	82.8211	243158626	755908	7.24085e+08	162.092	6.6661e-07	66.661
		SIP_5_Bin37	5mSIPHEX1_37_scaffold_1353_c1	5mSIPHEX1	4467123	8483	5mSIPHEX1	77.6389	243158626	658611	7.24085e+08	162.092	6.6661e-07	66.661
		SIP_5_Bin37	5mSIPHEX1_37_scaffold_1357_c1	5mSIPHEX1	4467123	8467	5mSIPHEX1	67.1052	243158626	568180	7.24085e+08	162.092	6.6661e-07	66.661
		SIP_5_Bin37	5mSIPHEX1_37_scaffold_1360_c1	5mSIPHEX1	4467123	8446	5mSIPHEX1	207.659	243158626	1.75389e+06	7.24085e+08	162.092	6.6661e-07	66.661
		SIP_5_Bin37	5mSIPHEX1_37_scaffold_206_c2	5mSIPHEX1	4467123	8353	5mSIPHEX1	140.553	243158626	1.17404e+06	7.24085e+08	162.092	6.6661e-07	66.661
		SIP_5_Bin37	5mSIPHEX1_37_scaffold_1514_c1	5mSIPHEX1	4467123	7520	5mSIPHEX1	166.749	243158626	1.25395e+06	7.24085e+08	162.092	6.6661e-07	66.661
		SIP_5_Bin37	5mSIPHEX1_37_scaffold_195_c4	5mSIPHEX1	4467123	7275	5mSIPHEX1	217.418	243158626	1.58172e+06	7.24085e+08	162.092	6.6661e-07	66.661
		SIP_5_Bin37	5mSIPHEX1_37_scaffold_1139_c1	5mSIPHEX1	4467123	6886	5mSIPHEX1	181.967	243158626	1.25302e+06	7.24085e+08	162.092	6.6661e-07	66.661
		SIP_5_Bin37	5mSIPHEX1_37_scaffold_295_c1	5mSIPHEX1	4467123	6544	5mSIPHEX1	179.214	243158626	1.17278e+06	7.24085e+08	162.092	6.6661e-07	66.661
		SIP_5_Bin37	5mSIPHEX1_37_scaffold_140_c3	5mSIPHEX1	4467123	6376	5mSIPHEX1	184.464	243158626	1.17614e+06	7.24085e+08	162.092	6.6661e-07	66.661
		SIP_5_Bin37	5mSIPHEX1_37_scaffold_1836_c1	5mSIPHEX1	4467123	6132	5mSIPHEX1	89.9472	243158626	551556	7.24085e+08	162.092	6.6661e-07	66.661
		SIP_5_Bin37	5mSIPHEX1_37_scaffold_410_c1	5mSIPHEX1	4467123	6060	5mSIPHEX1	181.279	243158626	1.09855e+06	7.24085e+08	162.092	6.6661e-07	66.661
		SIP_5_Bin37	5mSIPHEX1_37_scaffold_2021_c1	5mSIPHEX1	4467123	5641	5mSIPHEX1	63.4606	243158626	357981	7.24085e+08	162.092	6.6661e-07	66.661
		SIP_5_Bin37	5mSIPHEX1_37_scaffold_2151_c1	5mSIPHEX1	4467123	5370	5mSIPHEX1	159.601	243158626	857057	7.24085e+08	162.092	6.6661e-07	66.661
		SIP_5_Bin37	5mSIPHEX1_37_scaffold_195_c1	5mSIPHEX1	4467123	5151	5mSIPHEX1	209.425	243158626	1.07875e+06	7.24085e+08	162.092	6.6661e-07	66.661
		SIP_5_Bin37	5mSIPHEX1_37_scaffold_2347_c1	5mSIPHEX1	4467123	5030	5mSIPHEX1	143.317	243158626	720885	7.24085e+08	162.092	6.6661e-07	66.661
		SIP_5_Bin37	5mSIPHEX1_37_scaffold_3159_c1	5mSIPHEX1	4467123	3971	5mSIPHEX1	108.157	243158626	429491	7.24085e+08	162.092	6.6661e-07	66.661
		SIP_5_Bin37	5mSIPHEX1_37_scaffold_3158_c1	5mSIPHEX1	4467123	3971	5mSIPHEX1	97.7077	243158626	387997	7.24085e+08	162.092	6.6661e-07	66.661
		SIP_5_Bin37	5mSIPHEX1_37_scaffold_3354_c1	5mSIPHEX1	4467123	3774	5mSIPHEX1	67.4277	243158626	254472	7.24085e+08	162.092	6.6661e-07	66.661
		SIP_5_Bin37	5mSIPHEX1_37_scaffold_3461_c1	5mSIPHEX1	4467123	3674	5mSIPHEX1	95.2023	243158626	349773	7.24085e+08	162.092	6.6661e-07	66.661
		SIP_5_Bin37	5mSIPHEX1_37_scaffold_655_c2	5mSIPHEX1	4467123	3623	5mSIPHEX1	183.67	243158626	665436	7.24085e+08	162.092	6.6661e-07	66.661
		SIP_5_Bin37	5mSIPHEX1_37_scaffold_4076_c1	5mSIPHEX1	4467123	3249	5mSIPHEX1	142.062	243158626	461559	7.24085e+08	162.092	6.6661e-07	66.661
		SIP_5_Bin8	5mSIPHEX1_8_scaffold_68_c2	5mSIPHEX1	4631884	170333	5mSIPHEX1	17.1943	243158626	2.92876e+06	6.76629e+07	14.6081	6.00763e-08	6.00763
		SIP_5_Bin8	5mSIPHEX1_8_scaffold_88_c1	5mSIPHEX1	4631884	144343	5mSIPHEX1	15.7127	243158626	2.26802e+06	6.76629e+07	14.6081	6.00763e-08	6.00763
		SIP_5_Bin8	5mSIPHEX1_8_scaffold_117_c1	5mSIPHEX1	4631884	115448	5mSIPHEX1	14.8983	243158626	1.71998e+06	6.76629e+07	14.6081	6.00763e-08	6.00763
		SIP_5_Bin8	5mSIPHEX1_8_scaffold_139_c1	5mSIPHEX1	4631884	94671	5mSIPHEX1	12.9883	243158626	1.22962e+06	6.76629e+07	14.6081	6.00763e-08	6.00763
		SIP_5_Bin8	5mSIPHEX1_8_scaffold_141_c1	5mSIPHEX1	4631884	92411	5mSIPHEX1	12.8677	243158626	1.18912e+06	6.76629e+07	14.6081	6.00763e-08	6.00763
		SIP_5_Bin8	5mSIPHEX1_8_scaffold_152_c1	5mSIPHEX1	4631884	83900	5mSIPHEX1	14.6839	243158626	1.23198e+06	6.76629e+07	14.6081	6.00763e-08	6.00763
		SIP_5_Bin8	5mSIPHEX1_8_scaffold_155_c1	5mSIPHEX1	4631884	82839	5mSIPHEX1	12.2116	243158626	1.0116e+06	6.76629e+07	14.6081	6.00763e-08	6.00763
		SIP_5_Bin8	5mSIPHEX1_8_scaffold_157_c1	5mSIPHEX1	4631884	81126	5mSIPHEX1	16.2759	243158626	1.3204e+06	6.76629e+07	14.6081	6.00763e-08	6.00763
		SIP_5_Bin8	5mSIPHEX1_8_scaffold_167_c1	5mSIPHEX1	4631884	77270	5mSIPHEX1	16.7747	243158626	1.29618e+06	6.76629e+07	14.6081	6.00763e-08	6.00763
		SIP_5_Bin8	5mSIPHEX1_8_scaffold_177_c1	5mSIPHEX1	4631884	72584	5mSIPHEX1	15.6984	243158626	1.13945e+06	6.76629e+07	14.6081	6.00763e-08	6.00763
		SIP_5_Bin8	5mSIPHEX1_8_scaffold_189_c1	5mSIPHEX1	4631884	68530	5mSIPHEX1	17.5398	243158626	1.202e+06	6.76629e+07	14.6081	6.00763e-08	6.00763
		SIP_5_Bin8	5mSIPHEX1_8_scaffold_192_c1	5mSIPHEX1	4631884	67793	5mSIPHEX1	13.0121	243158626	882129	6.76629e+07	14.6081	6.00763e-08	6.00763
		SIP_5_Bin8	5mSIPHEX1_8_scaffold_194_c1	5mSIPHEX1	4631884	67435	5mSIPHEX1	14.0061	243158626	944501	6.76629e+07	14.6081	6.00763e-08	6.00763
		SIP_5_Bin8	5mSIPHEX1_8_scaffold_196_c1	5mSIPHEX1	4631884	67118	5mSIPHEX1	17.8453	243158626	1.19774e+06	6.76629e+07	14.6081	6.00763e-08	6.00763
		SIP_5_Bin8	5mSIPHEX1_8_scaffold_203_c1	5mSIPHEX1	4631884	64971	5mSIPHEX1	16.1694	243158626	1.05054e+06	6.76629e+07	14.6081	6.00763e-08	6.00763
		SIP_5_Bin8	5mSIPHEX1_8_scaffold_212_c1	5mSIPHEX1	4631884	60987	5mSIPHEX1	14.8637	243158626	906492	6.76629e+07	14.6081	6.00763e-08	6.00763
		SIP_5_Bin8	5mSIPHEX1_8_scaffold_215_c1	5mSIPHEX1	4631884	60470	5mSIPHEX1	15.9691	243158626	965651	6.76629e+07	14.6081	6.00763e-08	6.00763
		SIP_5_Bin8	5mSIPHEX1_8_scaffold_220_c1	5mSIPHEX1	4631884	59413	5mSIPHEX1	16.7559	243158626	995518	6.76629e+07	14.6081	6.00763e-08	6.00763
		SIP_5_Bin8	5mSIPHEX1_8_scaffold_222_c1	5mSIPHEX1	4631884	59354	5mSIPHEX1	14.3042	243158626	849011	6.76629e+07	14.6081	6.00763e-08	6.00763
		SIP_5_Bin8	5mSIPHEX1_8_scaffold_224_c1	5mSIPHEX1	4631884	59255	5mSIPHEX1	15.6373	243158626	926588	6.76629e+07	14.6081	6.00763e-08	6.00763
		SIP_5_Bin8	5mSIPHEX1_8_scaffold_237_c1	5mSIPHEX1	4631884	55867	5mSIPHEX1	16.2421	243158626	907397	6.76629e+07	14.6081	6.00763e-08	6.00763
		SIP_5_Bin8	5mSIPHEX1_8_scaffold_238_c1	5mSIPHEX1	4631884	55587	5mSIPHEX1	14.4297	243158626	802104	6.76629e+07	14.6081	6.00763e-08	6.00763
		SIP_5_Bin8	5mSIPHEX1_8_scaffold_243_c1	5mSIPHEX1	4631884	54788	5mSIPHEX1	15.967	243158626	874800	6.76629e+07	14.6081	6.00763e-08	6.00763
		SIP_5_Bin8	5mSIPHEX1_8_scaffold_266_c1	5mSIPHEX1	4631884	50763	5mSIPHEX1	18.9201	243158626	960441	6.76629e+07	14.6081	6.00763e-08	6.00763
		SIP_5_Bin8	5mSIPHEX1_8_scaffold_268_c1	5mSIPHEX1	4631884	50458	5mSIPHEX1	13.8543	243158626	699060	6.76629e+07	14.6081	6.00763e-08	6.00763
		SIP_5_Bin8	5mSIPHEX1_8_scaffold_269_c1	5mSIPHEX1	4631884	50330	5mSIPHEX1	13.9358	243158626	701389	6.76629e+07	14.6081	6.00763e-08	6.00763
		SIP_5_Bin8	5mSIPHEX1_8_scaffold_277_c1	5mSIPHEX1	4631884	47809	5mSIPHEX1	18.0029	243158626	860701	6.76629e+07	14.6081	6.00763e-08	6.00763
		SIP_5_Bin8	5mSIPHEX1_8_scaffold_289_c1	5mSIPHEX1	4631884	46357	5mSIPHEX1	12.1084	243158626	561309	6.76629e+07	14.6081	6.00763e-08	6.00763
		SIP_5_Bin8	5mSIPHEX1_8_scaffold_297_c1	5mSIPHEX1	4631884	45145	5mSIPHEX1	14.8789	243158626	671708	6.76629e+07	14.6081	6.00763e-08	6.00763
		SIP_5_Bin8	5mSIPHEX1_8_scaffold_298_c1	5mSIPHEX1	4631884	44499	5mSIPHEX1	13.7115	243158626	610148	6.76629e+07	14.6081	6.00763e-08	6.00763
		SIP_5_Bin8	5mSIPHEX1_8_scaffold_301_c1	5mSIPHEX1	4631884	44170	5mSIPHEX1	14.3661	243158626	634551	6.76629e+07	14.6081	6.00763e-08	6.00763
		SIP_5_Bin8	5mSIPHEX1_8_scaffold_302_c1	5mSIPHEX1	4631884	43892	5mSIPHEX1	16.6949	243158626	732773	6.76629e+07	14.6081	6.00763e-08	6.00763
		SIP_5_Bin8	5mSIPHEX1_8_scaffold_305_c1	5mSIPHEX1	4631884	43695	5mSIPHEX1	14.8297	243158626	647984	6.76629e+07	14.6081	6.00763e-08	6.00763
		SIP_5_Bin8	5mSIPHEX1_8_scaffold_312_c1	5mSIPHEX1	4631884	42639	5mSIPHEX1	16.0173	243158626	682962	6.76629e+07	14.6081	6.00763e-08	6.00763
		SIP_5_Bin8	5mSIPHEX1_8_scaffold_313_c1	5mSIPHEX1	4631884	42625	5mSIPHEX1	14.1609	243158626	603608	6.76629e+07	14.6081	6.00763e-08	6.00763
		SIP_5_Bin8	5mSIPHEX1_8_scaffold_276_c1	5mSIPHEX1	4631884	38124	5mSIPHEX1	16.0657	243158626	612489	6.76629e+07	14.6081	6.00763e-08	6.00763
		SIP_5_Bin8	5mSIPHEX1_8_scaffold_344_c1	5mSIPHEX1	4631884	37462	5mSIPHEX1	16.6087	243158626	622195	6.76629e+07	14.6081	6.00763e-08	6.00763
		SIP_5_Bin8	5mSIPHEX1_8_scaffold_345_c1	5mSIPHEX1	4631884	37383	5mSIPHEX1	15.8241	243158626	591552	6.76629e+07	14.6081	6.00763e-08	6.00763
		SIP_5_Bin8	5mSIPHEX1_8_scaffold_347_c1	5mSIPHEX1	4631884	37272	5mSIPHEX1	12.6238	243158626	470514	6.76629e+07	14.6081	6.00763e-08	6.00763
		SIP_5_Bin8	5mSIPHEX1_8_scaffold_361_c1	5mSIPHEX1	4631884	35731	5mSIPHEX1	15.7278	243158626	561970	6.76629e+07	14.6081	6.00763e-08	6.00763
		SIP_5_Bin8	5mSIPHEX1_8_scaffold_362_c1	5mSIPHEX1	4631884	35717	5mSIPHEX1	17.8127	243158626	636216	6.76629e+07	14.6081	6.00763e-08	6.00763
		SIP_5_Bin8	5mSIPHEX1_8_scaffold_369_c1	5mSIPHEX1	4631884	34802	5mSIPHEX1	17.9313	243158626	624045	6.76629e+07	14.6081	6.00763e-08	6.00763
		SIP_5_Bin8	5mSIPHEX1_8_scaffold_373_c1	5mSIPHEX1	4631884	34437	5mSIPHEX1	16.4037	243158626	564894	6.76629e+07	14.6081	6.00763e-08	6.00763
		SIP_5_Bin8	5mSIPHEX1_8_scaffold_374_c1	5mSIPHEX1	4631884	34335	5mSIPHEX1	16.4555	243158626	565000	6.76629e+07	14.6081	6.00763e-08	6.00763
		SIP_5_Bin8	5mSIPHEX1_8_scaffold_377_c1	5mSIPHEX1	4631884	34039	5mSIPHEX1	14.1423	243158626	481390	6.76629e+07	14.6081	6.00763e-08	6.00763
		SIP_5_Bin8	5mSIPHEX1_8_scaffold_382_c1	5mSIPHEX1	4631884	33504	5mSIPHEX1	13.4542	243158626	450770	6.76629e+07	14.6081	6.00763e-08	6.00763
		SIP_5_Bin8	5mSIPHEX1_8_scaffold_383_c1	5mSIPHEX1	4631884	33466	5mSIPHEX1	16.4376	243158626	550101	6.76629e+07	14.6081	6.00763e-08	6.00763
		SIP_5_Bin8	5mSIPHEX1_8_scaffold_390_c1	5mSIPHEX1	4631884	32939	5mSIPHEX1	13.3262	243158626	438952	6.76629e+07	14.6081	6.00763e-08	6.00763
		SIP_5_Bin8	5mSIPHEX1_8_scaffold_400_c1	5mSIPHEX1	4631884	31996	5mSIPHEX1	11.3087	243158626	361833	6.76629e+07	14.6081	6.00763e-08	6.00763
		SIP_5_Bin8	5mSIPHEX1_8_scaffold_404_c1	5mSIPHEX1	4631884	31576	5mSIPHEX1	15.0321	243158626	474654	6.76629e+07	14.6081	6.00763e-08	6.00763
		SIP_5_Bin8	5mSIPHEX1_8_scaffold_411_c1	5mSIPHEX1	4631884	31134	5mSIPHEX1	15.8042	243158626	492048	6.76629e+07	14.6081	6.00763e-08	6.00763
		SIP_5_Bin8	5mSIPHEX1_8_scaffold_415_c1	5mSIPHEX1	4631884	30742	5mSIPHEX1	15.6403	243158626	480814	6.76629e+07	14.6081	6.00763e-08	6.00763
		SIP_5_Bin8	5mSIPHEX1_8_scaffold_420_c1	5mSIPHEX1	4631884	29654	5mSIPHEX1	13.5786	243158626	402660	6.76629e+07	14.6081	6.00763e-08	6.00763
		SIP_5_Bin8	5mSIPHEX1_8_scaffold_423_c1	5mSIPHEX1	4631884	29315	5mSIPHEX1	14.1352	243158626	414373	6.76629e+07	14.6081	6.00763e-08	6.00763
		SIP_5_Bin8	5mSIPHEX1_8_scaffold_426_c1	5mSIPHEX1	4631884	28836	5mSIPHEX1	11.6158	243158626	334953	6.76629e+07	14.6081	6.00763e-08	6.00763
		SIP_5_Bin8	5mSIPHEX1_8_scaffold_437_c1	5mSIPHEX1	4631884	27917	5mSIPHEX1	14.4176	243158626	402496	6.76629e+07	14.6081	6.00763e-08	6.00763
		SIP_5_Bin8	5mSIPHEX1_8_scaffold_447_c1	5mSIPHEX1	4631884	27261	5mSIPHEX1	13.75	243158626	374839	6.76629e+07	14.6081	6.00763e-08	6.00763
		SIP_5_Bin8	5mSIPHEX1_8_scaffold_452_c1	5mSIPHEX1	4631884	27045	5mSIPHEX1	14.4219	243158626	390040	6.76629e+07	14.6081	6.00763e-08	6.00763
		SIP_5_Bin8	5mSIPHEX1_8_scaffold_459_c1	5mSIPHEX1	4631884	26655	5mSIPHEX1	11.1288	243158626	296638	6.76629e+07	14.6081	6.00763e-08	6.00763
		SIP_5_Bin8	5mSIPHEX1_8_scaffold_465_c1	5mSIPHEX1	4631884	26266	5mSIPHEX1	14.5382	243158626	381860	6.76629e+07	14.6081	6.00763e-08	6.00763
		SIP_5_Bin8	5mSIPHEX1_8_scaffold_468_c1	5mSIPHEX1	4631884	26175	5mSIPHEX1	14.4239	243158626	377546	6.76629e+07	14.6081	6.00763e-08	6.00763
		SIP_5_Bin8	5mSIPHEX1_8_scaffold_472_c1	5mSIPHEX1	4631884	26035	5mSIPHEX1	12.5261	243158626	326117	6.76629e+07	14.6081	6.00763e-08	6.00763
		SIP_5_Bin8	5mSIPHEX1_8_scaffold_473_c1	5mSIPHEX1	4631884	25990	5mSIPHEX1	16.3486	243158626	424900	6.76629e+07	14.6081	6.00763e-08	6.00763
		SIP_5_Bin8	5mSIPHEX1_8_scaffold_474_c1	5mSIPHEX1	4631884	25969	5mSIPHEX1	15.6847	243158626	407316	6.76629e+07	14.6081	6.00763e-08	6.00763
		SIP_5_Bin8	5mSIPHEX1_8_scaffold_480_c1	5mSIPHEX1	4631884	25598	5mSIPHEX1	16.2656	243158626	416367	6.76629e+07	14.6081	6.00763e-08	6.00763
		SIP_5_Bin8	5mSIPHEX1_8_scaffold_486_c1	5mSIPHEX1	4631884	25299	5mSIPHEX1	13.0212	243158626	329423	6.76629e+07	14.6081	6.00763e-08	6.00763
		SIP_5_Bin8	5mSIPHEX1_8_scaffold_488_c1	5mSIPHEX1	4631884	25097	5mSIPHEX1	10.1205	243158626	253994	6.76629e+07	14.6081	6.00763e-08	6.00763
		SIP_5_Bin8	5mSIPHEX1_8_scaffold_494_c1	5mSIPHEX1	4631884	24821	5mSIPHEX1	10.893	243158626	270375	6.76629e+07	14.6081	6.00763e-08	6.00763
		SIP_5_Bin8	5mSIPHEX1_8_scaffold_502_c1	5mSIPHEX1	4631884	24420	5mSIPHEX1	11.467	243158626	280024	6.76629e+07	14.6081	6.00763e-08	6.00763
		SIP_5_Bin8	5mSIPHEX1_8_scaffold_503_c1	5mSIPHEX1	4631884	24381	5mSIPHEX1	12.4557	243158626	303682	6.76629e+07	14.6081	6.00763e-08	6.00763
		SIP_5_Bin8	5mSIPHEX1_8_scaffold_518_c1	5mSIPHEX1	4631884	23696	5mSIPHEX1	13.9008	243158626	329393	6.76629e+07	14.6081	6.00763e-08	6.00763
		SIP_5_Bin8	5mSIPHEX1_8_scaffold_536_c1	5mSIPHEX1	4631884	22641	5mSIPHEX1	16.629	243158626	376497	6.76629e+07	14.6081	6.00763e-08	6.00763
		SIP_5_Bin8	5mSIPHEX1_8_scaffold_557_c1	5mSIPHEX1	4631884	21602	5mSIPHEX1	14.3104	243158626	309133	6.76629e+07	14.6081	6.00763e-08	6.00763
		SIP_5_Bin8	5mSIPHEX1_8_scaffold_559_c1	5mSIPHEX1	4631884	21537	5mSIPHEX1	15.9387	243158626	343272	6.76629e+07	14.6081	6.00763e-08	6.00763
		SIP_5_Bin8	5mSIPHEX1_8_scaffold_563_c1	5mSIPHEX1	4631884	21290	5mSIPHEX1	13.1561	243158626	280093	6.76629e+07	14.6081	6.00763e-08	6.00763
		SIP_5_Bin8	5mSIPHEX1_8_scaffold_569_c1	5mSIPHEX1	4631884	21260	5mSIPHEX1	15.7232	243158626	334275	6.76629e+07	14.6081	6.00763e-08	6.00763
		SIP_5_Bin8	5mSIPHEX1_8_scaffold_570_c1	5mSIPHEX1	4631884	21250	5mSIPHEX1	13.8476	243158626	294262	6.76629e+07	14.6081	6.00763e-08	6.00763
		SIP_5_Bin8	5mSIPHEX1_8_scaffold_575_c1	5mSIPHEX1	4631884	21071	5mSIPHEX1	15.2736	243158626	321830	6.76629e+07	14.6081	6.00763e-08	6.00763
		SIP_5_Bin8	5mSIPHEX1_8_scaffold_577_c1	5mSIPHEX1	4631884	20993	5mSIPHEX1	13.9315	243158626	292464	6.76629e+07	14.6081	6.00763e-08	6.00763
		SIP_5_Bin8	5mSIPHEX1_8_scaffold_582_c1	5mSIPHEX1	4631884	20796	5mSIPHEX1	15.2664	243158626	317480	6.76629e+07	14.6081	6.00763e-08	6.00763
		SIP_5_Bin8	5mSIPHEX1_8_scaffold_589_c1	5mSIPHEX1	4631884	20342	5mSIPHEX1	15.0034	243158626	305199	6.76629e+07	14.6081	6.00763e-08	6.00763
		SIP_5_Bin8	5mSIPHEX1_8_scaffold_593_c1	5mSIPHEX1	4631884	20268	5mSIPHEX1	13.2373	243158626	268294	6.76629e+07	14.6081	6.00763e-08	6.00763
		SIP_5_Bin8	5mSIPHEX1_8_scaffold_600_c1	5mSIPHEX1	4631884	20024	5mSIPHEX1	14.2382	243158626	285106	6.76629e+07	14.6081	6.00763e-08	6.00763
		SIP_5_Bin8	5mSIPHEX1_8_scaffold_610_c1	5mSIPHEX1	4631884	19625	5mSIPHEX1	17.4872	243158626	343186	6.76629e+07	14.6081	6.00763e-08	6.00763
		SIP_5_Bin8	5mSIPHEX1_8_scaffold_636_c1	5mSIPHEX1	4631884	18839	5mSIPHEX1	11.2613	243158626	212152	6.76629e+07	14.6081	6.00763e-08	6.00763
		SIP_5_Bin8	5mSIPHEX1_8_scaffold_670_c1	5mSIPHEX1	4631884	17723	5mSIPHEX1	15.8046	243158626	280105	6.76629e+07	14.6081	6.00763e-08	6.00763
		SIP_5_Bin8	5mSIPHEX1_8_scaffold_683_c1	5mSIPHEX1	4631884	17284	5mSIPHEX1	16.1604	243158626	279316	6.76629e+07	14.6081	6.00763e-08	6.00763
		SIP_5_Bin8	5mSIPHEX1_8_scaffold_697_c1	5mSIPHEX1	4631884	17046	5mSIPHEX1	15.3845	243158626	262244	6.76629e+07	14.6081	6.00763e-08	6.00763
		SIP_5_Bin8	5mSIPHEX1_8_scaffold_710_c1	5mSIPHEX1	4631884	16696	5mSIPHEX1	11.8788	243158626	198328	6.76629e+07	14.6081	6.00763e-08	6.00763
		SIP_5_Bin8	5mSIPHEX1_8_scaffold_715_c1	5mSIPHEX1	4631884	16627	5mSIPHEX1	15.1772	243158626	252351	6.76629e+07	14.6081	6.00763e-08	6.00763
		SIP_5_Bin8	5mSIPHEX1_8_scaffold_716_c1	5mSIPHEX1	4631884	16583	5mSIPHEX1	11.8899	243158626	197170	6.76629e+07	14.6081	6.00763e-08	6.00763
		SIP_5_Bin8	5mSIPHEX1_8_scaffold_729_c1	5mSIPHEX1	4631884	16246	5mSIPHEX1	14.2311	243158626	231198	6.76629e+07	14.6081	6.00763e-08	6.00763
		SIP_5_Bin8	5mSIPHEX1_8_scaffold_739_c1	5mSIPHEX1	4631884	16038	5mSIPHEX1	13.1458	243158626	210832	6.76629e+07	14.6081	6.00763e-08	6.00763
		SIP_5_Bin8	5mSIPHEX1_8_scaffold_751_c1	5mSIPHEX1	4631884	15711	5mSIPHEX1	15.6597	243158626	246030	6.76629e+07	14.6081	6.00763e-08	6.00763
		SIP_5_Bin8	5mSIPHEX1_8_scaffold_756_c1	5mSIPHEX1	4631884	15629	5mSIPHEX1	10.5596	243158626	165036	6.76629e+07	14.6081	6.00763e-08	6.00763
		SIP_5_Bin8	5mSIPHEX1_8_scaffold_758_c1	5mSIPHEX1	4631884	15628	5mSIPHEX1	15.6239	243158626	244170	6.76629e+07	14.6081	6.00763e-08	6.00763
		SIP_5_Bin8	5mSIPHEX1_8_scaffold_759_c1	5mSIPHEX1	4631884	15615	5mSIPHEX1	15.1725	243158626	236919	6.76629e+07	14.6081	6.00763e-08	6.00763
		SIP_5_Bin8	5mSIPHEX1_8_scaffold_789_c1	5mSIPHEX1	4631884	14947	5mSIPHEX1	10.0936	243158626	150869	6.76629e+07	14.6081	6.00763e-08	6.00763
		SIP_5_Bin8	5mSIPHEX1_8_scaffold_793_c1	5mSIPHEX1	4631884	14899	5mSIPHEX1	12.6807	243158626	188930	6.76629e+07	14.6081	6.00763e-08	6.00763
		SIP_5_Bin8	5mSIPHEX1_8_scaffold_794_c1	5mSIPHEX1	4631884	14843	5mSIPHEX1	12.8942	243158626	191389	6.76629e+07	14.6081	6.00763e-08	6.00763
		SIP_5_Bin8	5mSIPHEX1_8_scaffold_813_c1	5mSIPHEX1	4631884	14438	5mSIPHEX1	11.4458	243158626	165254	6.76629e+07	14.6081	6.00763e-08	6.00763
		SIP_5_Bin8	5mSIPHEX1_8_scaffold_826_c1	5mSIPHEX1	4631884	14218	5mSIPHEX1	9.59369	243158626	136403	6.76629e+07	14.6081	6.00763e-08	6.00763
		SIP_5_Bin8	5mSIPHEX1_8_scaffold_897_c1	5mSIPHEX1	4631884	12940	5mSIPHEX1	11.9457	243158626	154577	6.76629e+07	14.6081	6.00763e-08	6.00763
		SIP_5_Bin8	5mSIPHEX1_8_scaffold_908_c1	5mSIPHEX1	4631884	12789	5mSIPHEX1	12.1996	243158626	156021	6.76629e+07	14.6081	6.00763e-08	6.00763
		SIP_5_Bin8	5mSIPHEX1_8_scaffold_938_c1	5mSIPHEX1	4631884	12281	5mSIPHEX1	12.1479	243158626	149188	6.76629e+07	14.6081	6.00763e-08	6.00763
		SIP_5_Bin8	5mSIPHEX1_8_scaffold_988_c1	5mSIPHEX1	4631884	11559	5mSIPHEX1	14.2731	243158626	164983	6.76629e+07	14.6081	6.00763e-08	6.00763
		SIP_5_Bin8	5mSIPHEX1_8_scaffold_1016_c1	5mSIPHEX1	4631884	11139	5mSIPHEX1	14.7892	243158626	164737	6.76629e+07	14.6081	6.00763e-08	6.00763
		SIP_5_Bin8	5mSIPHEX1_8_scaffold_1026_c1	5mSIPHEX1	4631884	11036	5mSIPHEX1	11.8033	243158626	130261	6.76629e+07	14.6081	6.00763e-08	6.00763
		SIP_5_Bin8	5mSIPHEX1_8_scaffold_1054_c1	5mSIPHEX1	4631884	10710	5mSIPHEX1	11.1525	243158626	119443	6.76629e+07	14.6081	6.00763e-08	6.00763
		SIP_5_Bin8	5mSIPHEX1_8_scaffold_1063_c1	5mSIPHEX1	4631884	10670	5mSIPHEX1	13.0216	243158626	138940	6.76629e+07	14.6081	6.00763e-08	6.00763
		SIP_5_Bin8	5mSIPHEX1_8_scaffold_1075_c1	5mSIPHEX1	4631884	10537	5mSIPHEX1	15.7107	243158626	165544	6.76629e+07	14.6081	6.00763e-08	6.00763
		SIP_5_Bin8	5mSIPHEX1_8_scaffold_1106_c1	5mSIPHEX1	4631884	10246	5mSIPHEX1	18.839	243158626	193024	6.76629e+07	14.6081	6.00763e-08	6.00763
		SIP_5_Bin8	5mSIPHEX1_8_scaffold_1146_c1	5mSIPHEX1	4631884	9988	5mSIPHEX1	13.7474	243158626	137309	6.76629e+07	14.6081	6.00763e-08	6.00763
		SIP_5_Bin8	5mSIPHEX1_8_scaffold_1148_c1	5mSIPHEX1	4631884	9980	5mSIPHEX1	10.9302	243158626	109083	6.76629e+07	14.6081	6.00763e-08	6.00763
		SIP_5_Bin8	5mSIPHEX1_8_scaffold_276_c2	5mSIPHEX1	4631884	9934	5mSIPHEX1	17.3734	243158626	172587	6.76629e+07	14.6081	6.00763e-08	6.00763
		SIP_5_Bin8	5mSIPHEX1_8_scaffold_1157_c1	5mSIPHEX1	4631884	9894	5mSIPHEX1	15.2753	243158626	151134	6.76629e+07	14.6081	6.00763e-08	6.00763
		SIP_5_Bin8	5mSIPHEX1_8_scaffold_1188_c1	5mSIPHEX1	4631884	9599	5mSIPHEX1	11.7167	243158626	112469	6.76629e+07	14.6081	6.00763e-08	6.00763
		SIP_5_Bin8	5mSIPHEX1_8_scaffold_1190_c1	5mSIPHEX1	4631884	9588	5mSIPHEX1	15.3522	243158626	147197	6.76629e+07	14.6081	6.00763e-08	6.00763
		SIP_5_Bin8	5mSIPHEX1_8_scaffold_1196_c1	5mSIPHEX1	4631884	9516	5mSIPHEX1	19.4391	243158626	184982	6.76629e+07	14.6081	6.00763e-08	6.00763
		SIP_5_Bin8	5mSIPHEX1_8_scaffold_1198_c1	5mSIPHEX1	4631884	9497	5mSIPHEX1	10.0127	243158626	95090.6	6.76629e+07	14.6081	6.00763e-08	6.00763
		SIP_5_Bin8	5mSIPHEX1_8_scaffold_1210_c1	5mSIPHEX1	4631884	9410	5mSIPHEX1	12.8525	243158626	120942	6.76629e+07	14.6081	6.00763e-08	6.00763
		SIP_5_Bin8	5mSIPHEX1_8_scaffold_1211_c1	5mSIPHEX1	4631884	9403	5mSIPHEX1	14.3671	243158626	135094	6.76629e+07	14.6081	6.00763e-08	6.00763
		SIP_5_Bin8	5mSIPHEX1_8_scaffold_1222_c1	5mSIPHEX1	4631884	9336	5mSIPHEX1	12.1176	243158626	113130	6.76629e+07	14.6081	6.00763e-08	6.00763
		SIP_5_Bin8	5mSIPHEX1_8_scaffold_1246_c1	5mSIPHEX1	4631884	9150	5mSIPHEX1	14.3279	243158626	131100	6.76629e+07	14.6081	6.00763e-08	6.00763
		SIP_5_Bin8	5mSIPHEX1_8_scaffold_1261_c1	5mSIPHEX1	4631884	9046	5mSIPHEX1	13.0083	243158626	117673	6.76629e+07	14.6081	6.00763e-08	6.00763
		SIP_5_Bin8	5mSIPHEX1_8_scaffold_1372_c1	5mSIPHEX1	4631884	8401	5mSIPHEX1	12.9931	243158626	109155	6.76629e+07	14.6081	6.00763e-08	6.00763
		SIP_5_Bin8	5mSIPHEX1_8_scaffold_1419_c1	5mSIPHEX1	4631884	8069	5mSIPHEX1	10.5266	243158626	84939.1	6.76629e+07	14.6081	6.00763e-08	6.00763
		SIP_5_Bin8	5mSIPHEX1_8_scaffold_1423_c1	5mSIPHEX1	4631884	8034	5mSIPHEX1	14.5856	243158626	117181	6.76629e+07	14.6081	6.00763e-08	6.00763
		SIP_5_Bin8	5mSIPHEX1_8_scaffold_1447_c1	5mSIPHEX1	4631884	7868	5mSIPHEX1	15.0728	243158626	118593	6.76629e+07	14.6081	6.00763e-08	6.00763
		SIP_5_Bin8	5mSIPHEX1_8_scaffold_1471_c1	5mSIPHEX1	4631884	7731	5mSIPHEX1	9.31935	243158626	72047.9	6.76629e+07	14.6081	6.00763e-08	6.00763
		SIP_5_Bin8	5mSIPHEX1_8_scaffold_1484_c1	5mSIPHEX1	4631884	7669	5mSIPHEX1	10.189	243158626	78139.4	6.76629e+07	14.6081	6.00763e-08	6.00763
		SIP_5_Bin8	5mSIPHEX1_8_scaffold_1485_c1	5mSIPHEX1	4631884	7664	5mSIPHEX1	11.6849	243158626	89553.1	6.76629e+07	14.6081	6.00763e-08	6.00763
		SIP_5_Bin8	5mSIPHEX1_8_scaffold_1493_c1	5mSIPHEX1	4631884	7612	5mSIPHEX1	13.979	243158626	106408	6.76629e+07	14.6081	6.00763e-08	6.00763
		SIP_5_Bin8	5mSIPHEX1_8_scaffold_1499_c1	5mSIPHEX1	4631884	7588	5mSIPHEX1	11.4156	243158626	86621.6	6.76629e+07	14.6081	6.00763e-08	6.00763
		SIP_5_Bin8	5mSIPHEX1_8_scaffold_1504_c1	5mSIPHEX1	4631884	7550	5mSIPHEX1	9.69824	243158626	73221.7	6.76629e+07	14.6081	6.00763e-08	6.00763
		SIP_5_Bin8	5mSIPHEX1_8_scaffold_1517_c1	5mSIPHEX1	4631884	7506	5mSIPHEX1	11.3033	243158626	84842.6	6.76629e+07	14.6081	6.00763e-08	6.00763
		SIP_5_Bin8	5mSIPHEX1_8_scaffold_1533_c1	5mSIPHEX1	4631884	7437	5mSIPHEX1	11.7151	243158626	87125.2	6.76629e+07	14.6081	6.00763e-08	6.00763
		SIP_5_Bin8	5mSIPHEX1_8_scaffold_1553_c1	5mSIPHEX1	4631884	7311	5mSIPHEX1	11.54	243158626	84368.9	6.76629e+07	14.6081	6.00763e-08	6.00763
		SIP_5_Bin8	5mSIPHEX1_8_scaffold_1587_c1	5mSIPHEX1	4631884	7115	5mSIPHEX1	10.7918	243158626	76783.7	6.76629e+07	14.6081	6.00763e-08	6.00763
		SIP_5_Bin8	5mSIPHEX1_8_scaffold_1661_c1	5mSIPHEX1	4631884	6747	5mSIPHEX1	14.5737	243158626	98328.8	6.76629e+07	14.6081	6.00763e-08	6.00763
		SIP_5_Bin8	5mSIPHEX1_8_scaffold_1665_c1	5mSIPHEX1	4631884	6720	5mSIPHEX1	13.0615	243158626	87773.3	6.76629e+07	14.6081	6.00763e-08	6.00763
		SIP_5_Bin8	5mSIPHEX1_8_scaffold_1669_c1	5mSIPHEX1	4631884	6705	5mSIPHEX1	11.0214	243158626	73898.5	6.76629e+07	14.6081	6.00763e-08	6.00763
		SIP_5_Bin8	5mSIPHEX1_8_scaffold_1672_c1	5mSIPHEX1	4631884	6678	5mSIPHEX1	9.89966	243158626	66109.9	6.76629e+07	14.6081	6.00763e-08	6.00763
		SIP_5_Bin8	5mSIPHEX1_8_scaffold_1697_c1	5mSIPHEX1	4631884	6547	5mSIPHEX1	10.3156	243158626	67536.2	6.76629e+07	14.6081	6.00763e-08	6.00763
		SIP_5_Bin8	5mSIPHEX1_8_scaffold_718_c2	5mSIPHEX1	4631884	6381	5mSIPHEX1	15.7185	243158626	100300	6.76629e+07	14.6081	6.00763e-08	6.00763
		SIP_5_Bin8	5mSIPHEX1_8_scaffold_1755_c1	5mSIPHEX1	4631884	6365	5mSIPHEX1	6.77442	243158626	43119.2	6.76629e+07	14.6081	6.00763e-08	6.00763
		SIP_5_Bin8	5mSIPHEX1_8_scaffold_1767_c1	5mSIPHEX1	4631884	6323	5mSIPHEX1	12.5905	243158626	79609.7	6.76629e+07	14.6081	6.00763e-08	6.00763
		SIP_5_Bin8	5mSIPHEX1_8_scaffold_1775_c1	5mSIPHEX1	4631884	6305	5mSIPHEX1	10.7394	243158626	67711.9	6.76629e+07	14.6081	6.00763e-08	6.00763
		SIP_5_Bin8	5mSIPHEX1_8_scaffold_1884_c1	5mSIPHEX1	4631884	5984	5mSIPHEX1	13.3104	243158626	79649.4	6.76629e+07	14.6081	6.00763e-08	6.00763
		SIP_5_Bin8	5mSIPHEX1_8_scaffold_1925_c1	5mSIPHEX1	4631884	5868	5mSIPHEX1	11.1306	243158626	65314.4	6.76629e+07	14.6081	6.00763e-08	6.00763
		SIP_5_Bin8	5mSIPHEX1_8_scaffold_1969_c1	5mSIPHEX1	4631884	5761	5mSIPHEX1	14.8576	243158626	85594.6	6.76629e+07	14.6081	6.00763e-08	6.00763
		SIP_5_Bin8	5mSIPHEX1_8_scaffold_68_c1	5mSIPHEX1	4631884	5725	5mSIPHEX1	14.7415	243158626	84395.1	6.76629e+07	14.6081	6.00763e-08	6.00763
		SIP_5_Bin8	5mSIPHEX1_8_scaffold_2005_c1	5mSIPHEX1	4631884	5665	5mSIPHEX1	10.2461	243158626	58044.2	6.76629e+07	14.6081	6.00763e-08	6.00763
		SIP_5_Bin8	5mSIPHEX1_8_scaffold_2130_c1	5mSIPHEX1	4631884	5407	5mSIPHEX1	13.4746	243158626	72857.2	6.76629e+07	14.6081	6.00763e-08	6.00763
		SIP_5_Bin8	5mSIPHEX1_8_scaffold_2176_c1	5mSIPHEX1	4631884	5325	5mSIPHEX1	19.4649	243158626	103651	6.76629e+07	14.6081	6.00763e-08	6.00763
		SIP_5_Bin8	5mSIPHEX1_8_scaffold_2322_c1	5mSIPHEX1	4631884	5069	5mSIPHEX1	9.73226	243158626	49332.8	6.76629e+07	14.6081	6.00763e-08	6.00763
		SIP_5_Bin8	5mSIPHEX1_8_scaffold_2340_c1	5mSIPHEX1	4631884	5034	5mSIPHEX1	12.8978	243158626	64927.5	6.76629e+07	14.6081	6.00763e-08	6.00763
		SIP_5_Bin8	5mSIPHEX1_8_scaffold_1814_c2	5mSIPHEX1	4631884	5002	5mSIPHEX1	12.5169	243158626	62609.5	6.76629e+07	14.6081	6.00763e-08	6.00763
		SIP_5_Bin8	5mSIPHEX1_8_scaffold_2392_c1	5mSIPHEX1	4631884	4951	5mSIPHEX1	18.5988	243158626	92082.7	6.76629e+07	14.6081	6.00763e-08	6.00763
		SIP_5_Bin8	5mSIPHEX1_8_scaffold_2447_c1	5mSIPHEX1	4631884	4858	5mSIPHEX1	13.4777	243158626	65474.7	6.76629e+07	14.6081	6.00763e-08	6.00763
		SIP_5_Bin8	5mSIPHEX1_8_scaffold_2583_c1	5mSIPHEX1	4631884	4630	5mSIPHEX1	10.135	243158626	46925.1	6.76629e+07	14.6081	6.00763e-08	6.00763
		SIP_5_Bin8	5mSIPHEX1_8_scaffold_2631_c1	5mSIPHEX1	4631884	4547	5mSIPHEX1	19.4667	243158626	88515.1	6.76629e+07	14.6081	6.00763e-08	6.00763
		SIP_5_Bin8	5mSIPHEX1_8_scaffold_2844_c1	5mSIPHEX1	4631884	4289	5mSIPHEX1	6.54409	243158626	28067.6	6.76629e+07	14.6081	6.00763e-08	6.00763
		SIP_5_Bin8	5mSIPHEX1_8_scaffold_2868_c1	5mSIPHEX1	4631884	4259	5mSIPHEX1	11.127	243158626	47389.9	6.76629e+07	14.6081	6.00763e-08	6.00763
		SIP_5_Bin8	5mSIPHEX1_8_scaffold_2891_c1	5mSIPHEX1	4631884	4230	5mSIPHEX1	13.225	243158626	55941.8	6.76629e+07	14.6081	6.00763e-08	6.00763
		SIP_5_Bin8	5mSIPHEX1_8_scaffold_2898_c1	5mSIPHEX1	4631884	4223	5mSIPHEX1	12.6909	243158626	53593.7	6.76629e+07	14.6081	6.00763e-08	6.00763
		SIP_5_Bin8	5mSIPHEX1_8_scaffold_2949_c1	5mSIPHEX1	4631884	4163	5mSIPHEX1	11.5896	243158626	48247.5	6.76629e+07	14.6081	6.00763e-08	6.00763
		SIP_5_Bin8	5mSIPHEX1_8_scaffold_2958_c1	5mSIPHEX1	4631884	4154	5mSIPHEX1	11.0729	243158626	45996.8	6.76629e+07	14.6081	6.00763e-08	6.00763
		SIP_5_Bin8	5mSIPHEX1_8_scaffold_2978_c1	5mSIPHEX1	4631884	4137	5mSIPHEX1	14.9528	243158626	61859.7	6.76629e+07	14.6081	6.00763e-08	6.00763
		SIP_5_Bin8	5mSIPHEX1_8_scaffold_2985_c1	5mSIPHEX1	4631884	4131	5mSIPHEX1	11.2102	243158626	46309.3	6.76629e+07	14.6081	6.00763e-08	6.00763
		SIP_5_Bin8	5mSIPHEX1_8_scaffold_2992_c1	5mSIPHEX1	4631884	4124	5mSIPHEX1	7.61777	243158626	31415.7	6.76629e+07	14.6081	6.00763e-08	6.00763
		SIP_5_Bin8	5mSIPHEX1_8_scaffold_2996_c1	5mSIPHEX1	4631884	4114	5mSIPHEX1	9.04137	243158626	37196.2	6.76629e+07	14.6081	6.00763e-08	6.00763
		SIP_5_Bin8	5mSIPHEX1_8_scaffold_3019_c1	5mSIPHEX1	4631884	4098	5mSIPHEX1	12.4329	243158626	50950	6.76629e+07	14.6081	6.00763e-08	6.00763
		SIP_5_Bin8	5mSIPHEX1_8_scaffold_3027_c1	5mSIPHEX1	4631884	4094	5mSIPHEX1	17.1159	243158626	70072.5	6.76629e+07	14.6081	6.00763e-08	6.00763
		SIP_5_Bin8	5mSIPHEX1_8_scaffold_3142_c1	5mSIPHEX1	4631884	3990	5mSIPHEX1	20.8768	243158626	83298.4	6.76629e+07	14.6081	6.00763e-08	6.00763
		SIP_5_Bin8	5mSIPHEX1_8_scaffold_3175_c1	5mSIPHEX1	4631884	3956	5mSIPHEX1	14.1019	243158626	55787.1	6.76629e+07	14.6081	6.00763e-08	6.00763
		SIP_5_Bin8	5mSIPHEX1_8_scaffold_3277_c1	5mSIPHEX1	4631884	3849	5mSIPHEX1	13.1306	243158626	50539.7	6.76629e+07	14.6081	6.00763e-08	6.00763
		SIP_5_Bin8	5mSIPHEX1_8_scaffold_3370_c1	5mSIPHEX1	4631884	3757	5mSIPHEX1	11.425	243158626	42923.7	6.76629e+07	14.6081	6.00763e-08	6.00763
		SIP_5_Bin8	5mSIPHEX1_8_scaffold_3429_c1	5mSIPHEX1	4631884	3702	5mSIPHEX1	9.54814	243158626	35347.2	6.76629e+07	14.6081	6.00763e-08	6.00763
		SIP_5_Bin8	5mSIPHEX1_8_scaffold_3485_c1	5mSIPHEX1	4631884	3650	5mSIPHEX1	16.5843	243158626	60532.7	6.76629e+07	14.6081	6.00763e-08	6.00763
		SIP_5_Bin8	5mSIPHEX1_8_scaffold_3772_c1	5mSIPHEX1	4631884	3454	5mSIPHEX1	17.7924	243158626	61454.9	6.76629e+07	14.6081	6.00763e-08	6.00763
		SIP_5_Bin8	5mSIPHEX1_8_scaffold_4024_c1	5mSIPHEX1	4631884	3281	5mSIPHEX1	13.9109	243158626	45641.7	6.76629e+07	14.6081	6.00763e-08	6.00763
		SIP_5_Bin8	5mSIPHEX1_8_scaffold_1622_c1	5mSIPHEX1	4631884	3215	5mSIPHEX1	7.54062	243158626	24243.1	6.76629e+07	14.6081	6.00763e-08	6.00763
		SIP_5_Bin8	5mSIPHEX1_8_scaffold_4422_c1	5mSIPHEX1	4631884	3084	5mSIPHEX1	9.14315	243158626	28197.5	6.76629e+07	14.6081	6.00763e-08	6.00763
		SIP_5_Bin8	5mSIPHEX1_8_scaffold_4756_c1	5mSIPHEX1	4631884	2925	5mSIPHEX1	9.03063	243158626	26414.6	6.76629e+07	14.6081	6.00763e-08	6.00763
		SIP_5_Bin8	5mSIPHEX1_8_scaffold_4896_c1	5mSIPHEX1	4631884	2855	5mSIPHEX1	13.0884	243158626	37367.4	6.76629e+07	14.6081	6.00763e-08	6.00763
		SIP_5_Bin8	5mSIPHEX1_8_scaffold_5228_c1	5mSIPHEX1	4631884	2723	5mSIPHEX1	8.38593	243158626	22834.9	6.76629e+07	14.6081	6.00763e-08	6.00763
		SIP_5_Bin8	5mSIPHEX1_8_scaffold_5381_c1	5mSIPHEX1	4631884	2656	5mSIPHEX1	15.2813	243158626	40587.1	6.76629e+07	14.6081	6.00763e-08	6.00763
		SIP_5_Bin8	5mSIPHEX1_8_scaffold_5407_c1	5mSIPHEX1	4631884	2644	5mSIPHEX1	16.8837	243158626	44640.5	6.76629e+07	14.6081	6.00763e-08	6.00763
		SIP_5_Bin8	5mSIPHEX1_8_scaffold_5524_c1	5mSIPHEX1	4631884	2604	5mSIPHEX1	8.12592	243158626	21159.9	6.76629e+07	14.6081	6.00763e-08	6.00763
		SIP_5_Bin8	5mSIPHEX1_8_scaffold_5611_c1	5mSIPHEX1	4631884	2571	5mSIPHEX1	9.64436	243158626	24795.6	6.76629e+07	14.6081	6.00763e-08	6.00763
		SIP_5_Bin8	5mSIPHEX1_8_scaffold_5740_c1	5mSIPHEX1	4631884	2537	5mSIPHEX1	9.59196	243158626	24334.8	6.76629e+07	14.6081	6.00763e-08	6.00763
		SIP_5_Bin8	5mSIPHEX1_8_scaffold_5812_c1	5mSIPHEX1	4631884	2513	5mSIPHEX1	6.52857	243158626	16406.3	6.76629e+07	14.6081	6.00763e-08	6.00763
		SIP_5_Bin8	5mSIPHEX1_8_scaffold_5838_c1	5mSIPHEX1	4631884	2505	5mSIPHEX1	9.44459	243158626	23658.7	6.76629e+07	14.6081	6.00763e-08	6.00763
		SIP_5_Bin8	5mSIPHEX1_8_scaffold_5867_c1	5mSIPHEX1	4631884	2493	5mSIPHEX1	8.43918	243158626	21038.9	6.76629e+07	14.6081	6.00763e-08	6.00763
		SIP_5_Bin8	5mSIPHEX1_8_scaffold_5902_c1	5mSIPHEX1	4631884	2484	5mSIPHEX1	5.78149	243158626	14361.2	6.76629e+07	14.6081	6.00763e-08	6.00763
		SIP_5_Bin8	5mSIPHEX1_8_scaffold_5965_c1	5mSIPHEX1	4631884	2465	5mSIPHEX1	8.16803	243158626	20134.2	6.76629e+07	14.6081	6.00763e-08	6.00763
		SIP_5_Bin8	5mSIPHEX1_8_scaffold_6011_c1	5mSIPHEX1	4631884	2454	5mSIPHEX1	10.4197	243158626	25569.9	6.76629e+07	14.6081	6.00763e-08	6.00763
		SIP_5_Bin8	5mSIPHEX1_8_scaffold_6309_c1	5mSIPHEX1	4631884	2366	5mSIPHEX1	11.093	243158626	26246	6.76629e+07	14.6081	6.00763e-08	6.00763
		SIP_5_Bin8	5mSIPHEX1_8_scaffold_6461_c1	5mSIPHEX1	4631884	2323	5mSIPHEX1	10.8748	243158626	25262.2	6.76629e+07	14.6081	6.00763e-08	6.00763
		SIP_5_Bin8	5mSIPHEX1_8_scaffold_6652_c1	5mSIPHEX1	4631884	2277	5mSIPHEX1	9.18054	243158626	20904.1	6.76629e+07	14.6081	6.00763e-08	6.00763
		SIP_5_Bin8	5mSIPHEX1_8_scaffold_7068_c1	5mSIPHEX1	4631884	2172	5mSIPHEX1	8.3457	243158626	18126.9	6.76629e+07	14.6081	6.00763e-08	6.00763
		SIP_5_Bin8	5mSIPHEX1_8_scaffold_7167_c1	5mSIPHEX1	4631884	2148	5mSIPHEX1	17.8664	243158626	38377	6.76629e+07	14.6081	6.00763e-08	6.00763
		SIP_5_Bin8	5mSIPHEX1_8_scaffold_7239_c1	5mSIPHEX1	4631884	2131	5mSIPHEX1	7.789	243158626	16598.4	6.76629e+07	14.6081	6.00763e-08	6.00763
		SIP_5_Bin8	5mSIPHEX1_8_scaffold_7845_c1	5mSIPHEX1	4631884	2011	5mSIPHEX1	14.5927	243158626	29345.9	6.76629e+07	14.6081	6.00763e-08	6.00763
		SIP_5_Bin32	5mSIPHEX1_32_scaffold_80_c1	5mSIPHEX1	3565054	155515	5mSIPHEX1	13.1046	243158626	2.03796e+06	4.61058e+07	12.9327	5.31863e-08	5.31863
		SIP_5_Bin32	5mSIPHEX1_32_scaffold_83_c1	5mSIPHEX1	3565054	150108	5mSIPHEX1	15.3295	243158626	2.30108e+06	4.61058e+07	12.9327	5.31863e-08	5.31863
		SIP_5_Bin32	5mSIPHEX1_32_scaffold_126_c1	5mSIPHEX1	3565054	102380	5mSIPHEX1	13.8803	243158626	1.42107e+06	4.61058e+07	12.9327	5.31863e-08	5.31863
		SIP_5_Bin32	5mSIPHEX1_32_scaffold_134_c1	5mSIPHEX1	3565054	96072	5mSIPHEX1	11.9785	243158626	1.1508e+06	4.61058e+07	12.9327	5.31863e-08	5.31863
		SIP_5_Bin32	5mSIPHEX1_32_scaffold_138_c1	5mSIPHEX1	3565054	95437	5mSIPHEX1	14.3602	243158626	1.37049e+06	4.61058e+07	12.9327	5.31863e-08	5.31863
		SIP_5_Bin32	5mSIPHEX1_32_scaffold_173_c1	5mSIPHEX1	3565054	73507	5mSIPHEX1	13.4732	243158626	990375	4.61058e+07	12.9327	5.31863e-08	5.31863
		SIP_5_Bin32	5mSIPHEX1_32_scaffold_144_c2	5mSIPHEX1	3565054	72872	5mSIPHEX1	13.2339	243158626	964381	4.61058e+07	12.9327	5.31863e-08	5.31863
		SIP_5_Bin32	5mSIPHEX1_32_scaffold_183_c1	5mSIPHEX1	3565054	70773	5mSIPHEX1	13.058	243158626	924154	4.61058e+07	12.9327	5.31863e-08	5.31863
		SIP_5_Bin32	5mSIPHEX1_32_scaffold_184_c1	5mSIPHEX1	3565054	70683	5mSIPHEX1	12.0353	243158626	850691	4.61058e+07	12.9327	5.31863e-08	5.31863
		SIP_5_Bin32	5mSIPHEX1_32_scaffold_163_c2	5mSIPHEX1	3565054	64099	5mSIPHEX1	13.1207	243158626	841024	4.61058e+07	12.9327	5.31863e-08	5.31863
		SIP_5_Bin32	5mSIPHEX1_32_scaffold_210_c1	5mSIPHEX1	3565054	61057	5mSIPHEX1	10.6205	243158626	648456	4.61058e+07	12.9327	5.31863e-08	5.31863
		SIP_5_Bin32	5mSIPHEX1_32_scaffold_213_c1	5mSIPHEX1	3565054	60864	5mSIPHEX1	11.6378	243158626	708323	4.61058e+07	12.9327	5.31863e-08	5.31863
		SIP_5_Bin32	5mSIPHEX1_32_scaffold_219_c1	5mSIPHEX1	3565054	59732	5mSIPHEX1	13.4116	243158626	801102	4.61058e+07	12.9327	5.31863e-08	5.31863
		SIP_5_Bin32	5mSIPHEX1_32_scaffold_234_c1	5mSIPHEX1	3565054	56389	5mSIPHEX1	12.7319	243158626	717939	4.61058e+07	12.9327	5.31863e-08	5.31863
		SIP_5_Bin32	5mSIPHEX1_32_scaffold_242_c1	5mSIPHEX1	3565054	54874	5mSIPHEX1	13.3257	243158626	731234	4.61058e+07	12.9327	5.31863e-08	5.31863
		SIP_5_Bin32	5mSIPHEX1_32_scaffold_257_c1	5mSIPHEX1	3565054	51890	5mSIPHEX1	15.0932	243158626	783186	4.61058e+07	12.9327	5.31863e-08	5.31863
		SIP_5_Bin32	5mSIPHEX1_32_scaffold_259_c1	5mSIPHEX1	3565054	51553	5mSIPHEX1	13.4685	243158626	694342	4.61058e+07	12.9327	5.31863e-08	5.31863
		SIP_5_Bin32	5mSIPHEX1_32_scaffold_260_c1	5mSIPHEX1	3565054	51454	5mSIPHEX1	14.6177	243158626	752139	4.61058e+07	12.9327	5.31863e-08	5.31863
		SIP_5_Bin32	5mSIPHEX1_32_scaffold_273_c1	5mSIPHEX1	3565054	49832	5mSIPHEX1	13.6865	243158626	682026	4.61058e+07	12.9327	5.31863e-08	5.31863
		SIP_5_Bin32	5mSIPHEX1_32_scaffold_280_c1	5mSIPHEX1	3565054	47522	5mSIPHEX1	14.4136	243158626	684963	4.61058e+07	12.9327	5.31863e-08	5.31863
		SIP_5_Bin32	5mSIPHEX1_32_scaffold_292_c1	5mSIPHEX1	3565054	45766	5mSIPHEX1	15.0816	243158626	690225	4.61058e+07	12.9327	5.31863e-08	5.31863
		SIP_5_Bin32	5mSIPHEX1_32_scaffold_293_c1	5mSIPHEX1	3565054	45687	5mSIPHEX1	14.5519	243158626	664833	4.61058e+07	12.9327	5.31863e-08	5.31863
		SIP_5_Bin32	5mSIPHEX1_32_scaffold_303_c1	5mSIPHEX1	3565054	43820	5mSIPHEX1	15.1877	243158626	665525	4.61058e+07	12.9327	5.31863e-08	5.31863
		SIP_5_Bin32	5mSIPHEX1_32_scaffold_306_c1	5mSIPHEX1	3565054	43692	5mSIPHEX1	13.137	243158626	573982	4.61058e+07	12.9327	5.31863e-08	5.31863
		SIP_5_Bin32	5mSIPHEX1_32_scaffold_310_c1	5mSIPHEX1	3565054	42729	5mSIPHEX1	13.0818	243158626	558972	4.61058e+07	12.9327	5.31863e-08	5.31863
		SIP_5_Bin32	5mSIPHEX1_32_scaffold_311_c1	5mSIPHEX1	3565054	42684	5mSIPHEX1	13.3602	243158626	570267	4.61058e+07	12.9327	5.31863e-08	5.31863
		SIP_5_Bin32	5mSIPHEX1_32_scaffold_321_c1	5mSIPHEX1	3565054	41095	5mSIPHEX1	13.0201	243158626	535061	4.61058e+07	12.9327	5.31863e-08	5.31863
		SIP_5_Bin32	5mSIPHEX1_32_scaffold_325_c1	5mSIPHEX1	3565054	39761	5mSIPHEX1	12.513	243158626	497529	4.61058e+07	12.9327	5.31863e-08	5.31863
		SIP_5_Bin32	5mSIPHEX1_32_scaffold_331_c1	5mSIPHEX1	3565054	38848	5mSIPHEX1	10.4296	243158626	405169	4.61058e+07	12.9327	5.31863e-08	5.31863
		SIP_5_Bin32	5mSIPHEX1_32_scaffold_218_c1	5mSIPHEX1	3565054	36457	5mSIPHEX1	10.5604	243158626	385001	4.61058e+07	12.9327	5.31863e-08	5.31863
		SIP_5_Bin32	5mSIPHEX1_32_scaffold_357_c1	5mSIPHEX1	3565054	36198	5mSIPHEX1	13.5592	243158626	490816	4.61058e+07	12.9327	5.31863e-08	5.31863
		SIP_5_Bin32	5mSIPHEX1_32_scaffold_363_c1	5mSIPHEX1	3565054	35716	5mSIPHEX1	14.7266	243158626	525975	4.61058e+07	12.9327	5.31863e-08	5.31863
		SIP_5_Bin32	5mSIPHEX1_32_scaffold_364_c1	5mSIPHEX1	3565054	35570	5mSIPHEX1	15.409	243158626	548098	4.61058e+07	12.9327	5.31863e-08	5.31863
		SIP_5_Bin32	5mSIPHEX1_32_scaffold_365_c1	5mSIPHEX1	3565054	35483	5mSIPHEX1	14.0957	243158626	500158	4.61058e+07	12.9327	5.31863e-08	5.31863
		SIP_5_Bin32	5mSIPHEX1_32_scaffold_367_c1	5mSIPHEX1	3565054	34872	5mSIPHEX1	14.9213	243158626	520336	4.61058e+07	12.9327	5.31863e-08	5.31863
		SIP_5_Bin32	5mSIPHEX1_32_scaffold_388_c1	5mSIPHEX1	3565054	33130	5mSIPHEX1	13.8458	243158626	458711	4.61058e+07	12.9327	5.31863e-08	5.31863
		SIP_5_Bin32	5mSIPHEX1_32_scaffold_407_c1	5mSIPHEX1	3565054	31405	5mSIPHEX1	10.3236	243158626	324213	4.61058e+07	12.9327	5.31863e-08	5.31863
		SIP_5_Bin32	5mSIPHEX1_32_scaffold_424_c1	5mSIPHEX1	3565054	29306	5mSIPHEX1	12.3737	243158626	362624	4.61058e+07	12.9327	5.31863e-08	5.31863
		SIP_5_Bin32	5mSIPHEX1_32_scaffold_436_c1	5mSIPHEX1	3565054	27946	5mSIPHEX1	13.6661	243158626	381913	4.61058e+07	12.9327	5.31863e-08	5.31863
		SIP_5_Bin32	5mSIPHEX1_32_scaffold_438_c1	5mSIPHEX1	3565054	27897	5mSIPHEX1	10.8827	243158626	303595	4.61058e+07	12.9327	5.31863e-08	5.31863
		SIP_5_Bin32	5mSIPHEX1_32_scaffold_439_c1	5mSIPHEX1	3565054	27775	5mSIPHEX1	15.0887	243158626	419089	4.61058e+07	12.9327	5.31863e-08	5.31863
		SIP_5_Bin32	5mSIPHEX1_32_scaffold_440_c1	5mSIPHEX1	3565054	27763	5mSIPHEX1	11.4251	243158626	317195	4.61058e+07	12.9327	5.31863e-08	5.31863
		SIP_5_Bin32	5mSIPHEX1_32_scaffold_446_c1	5mSIPHEX1	3565054	27261	5mSIPHEX1	12.9548	243158626	353161	4.61058e+07	12.9327	5.31863e-08	5.31863
		SIP_5_Bin32	5mSIPHEX1_32_scaffold_462_c1	5mSIPHEX1	3565054	26447	5mSIPHEX1	14.5517	243158626	384849	4.61058e+07	12.9327	5.31863e-08	5.31863
		SIP_5_Bin32	5mSIPHEX1_32_scaffold_493_c1	5mSIPHEX1	3565054	24826	5mSIPHEX1	10.8595	243158626	269598	4.61058e+07	12.9327	5.31863e-08	5.31863
		SIP_5_Bin32	5mSIPHEX1_32_scaffold_506_c1	5mSIPHEX1	3565054	24288	5mSIPHEX1	11.7446	243158626	285253	4.61058e+07	12.9327	5.31863e-08	5.31863
		SIP_5_Bin32	5mSIPHEX1_32_scaffold_507_c1	5mSIPHEX1	3565054	24276	5mSIPHEX1	13.9867	243158626	339541	4.61058e+07	12.9327	5.31863e-08	5.31863
		SIP_5_Bin32	5mSIPHEX1_32_scaffold_510_c1	5mSIPHEX1	3565054	24088	5mSIPHEX1	11.0316	243158626	265729	4.61058e+07	12.9327	5.31863e-08	5.31863
		SIP_5_Bin32	5mSIPHEX1_32_scaffold_517_c1	5mSIPHEX1	3565054	23766	5mSIPHEX1	12.6562	243158626	300787	4.61058e+07	12.9327	5.31863e-08	5.31863
		SIP_5_Bin32	5mSIPHEX1_32_scaffold_519_c1	5mSIPHEX1	3565054	23672	5mSIPHEX1	14.3889	243158626	340614	4.61058e+07	12.9327	5.31863e-08	5.31863
		SIP_5_Bin32	5mSIPHEX1_32_scaffold_218_c2	5mSIPHEX1	3565054	23525	5mSIPHEX1	11.8744	243158626	279345	4.61058e+07	12.9327	5.31863e-08	5.31863
		SIP_5_Bin32	5mSIPHEX1_32_scaffold_533_c1	5mSIPHEX1	3565054	22885	5mSIPHEX1	15.1163	243158626	345937	4.61058e+07	12.9327	5.31863e-08	5.31863
		SIP_5_Bin32	5mSIPHEX1_32_scaffold_552_c1	5mSIPHEX1	3565054	21739	5mSIPHEX1	11.8006	243158626	256533	4.61058e+07	12.9327	5.31863e-08	5.31863
		SIP_5_Bin32	5mSIPHEX1_32_scaffold_567_c1	5mSIPHEX1	3565054	21276	5mSIPHEX1	12.3658	243158626	263095	4.61058e+07	12.9327	5.31863e-08	5.31863
		SIP_5_Bin32	5mSIPHEX1_32_scaffold_566_c1	5mSIPHEX1	3565054	21276	5mSIPHEX1	11.9263	243158626	253744	4.61058e+07	12.9327	5.31863e-08	5.31863
		SIP_5_Bin32	5mSIPHEX1_32_scaffold_576_c1	5mSIPHEX1	3565054	21014	5mSIPHEX1	11.3149	243158626	237771	4.61058e+07	12.9327	5.31863e-08	5.31863
		SIP_5_Bin32	5mSIPHEX1_32_scaffold_581_c1	5mSIPHEX1	3565054	20859	5mSIPHEX1	10.8478	243158626	226274	4.61058e+07	12.9327	5.31863e-08	5.31863
		SIP_5_Bin32	5mSIPHEX1_32_scaffold_588_c1	5mSIPHEX1	3565054	20359	5mSIPHEX1	11.5903	243158626	235967	4.61058e+07	12.9327	5.31863e-08	5.31863
		SIP_5_Bin32	5mSIPHEX1_32_scaffold_595_c1	5mSIPHEX1	3565054	20160	5mSIPHEX1	12.718	243158626	256395	4.61058e+07	12.9327	5.31863e-08	5.31863
		SIP_5_Bin32	5mSIPHEX1_32_scaffold_596_c1	5mSIPHEX1	3565054	20143	5mSIPHEX1	10.9731	243158626	221031	4.61058e+07	12.9327	5.31863e-08	5.31863
		SIP_5_Bin32	5mSIPHEX1_32_scaffold_618_c1	5mSIPHEX1	3565054	19415	5mSIPHEX1	10.0598	243158626	195311	4.61058e+07	12.9327	5.31863e-08	5.31863
		SIP_5_Bin32	5mSIPHEX1_32_scaffold_628_c1	5mSIPHEX1	3565054	19167	5mSIPHEX1	13.0516	243158626	250160	4.61058e+07	12.9327	5.31863e-08	5.31863
		SIP_5_Bin32	5mSIPHEX1_32_scaffold_633_c1	5mSIPHEX1	3565054	18980	5mSIPHEX1	14.9955	243158626	284615	4.61058e+07	12.9327	5.31863e-08	5.31863
		SIP_5_Bin32	5mSIPHEX1_32_scaffold_637_c1	5mSIPHEX1	3565054	18787	5mSIPHEX1	11.4856	243158626	215780	4.61058e+07	12.9327	5.31863e-08	5.31863
		SIP_5_Bin32	5mSIPHEX1_32_scaffold_144_c1	5mSIPHEX1	3565054	17713	5mSIPHEX1	15.6481	243158626	277175	4.61058e+07	12.9327	5.31863e-08	5.31863
		SIP_5_Bin32	5mSIPHEX1_32_scaffold_681_c1	5mSIPHEX1	3565054	17360	5mSIPHEX1	13.4829	243158626	234063	4.61058e+07	12.9327	5.31863e-08	5.31863
		SIP_5_Bin32	5mSIPHEX1_32_scaffold_688_c1	5mSIPHEX1	3565054	17222	5mSIPHEX1	10.2701	243158626	176872	4.61058e+07	12.9327	5.31863e-08	5.31863
		SIP_5_Bin32	5mSIPHEX1_32_scaffold_694_c1	5mSIPHEX1	3565054	17098	5mSIPHEX1	11.5389	243158626	197292	4.61058e+07	12.9327	5.31863e-08	5.31863
		SIP_5_Bin32	5mSIPHEX1_32_scaffold_712_c1	5mSIPHEX1	3565054	16683	5mSIPHEX1	9.50566	243158626	158583	4.61058e+07	12.9327	5.31863e-08	5.31863
		SIP_5_Bin32	5mSIPHEX1_32_scaffold_721_c1	5mSIPHEX1	3565054	16408	5mSIPHEX1	10.6981	243158626	175534	4.61058e+07	12.9327	5.31863e-08	5.31863
		SIP_5_Bin32	5mSIPHEX1_32_scaffold_727_c1	5mSIPHEX1	3565054	16283	5mSIPHEX1	12.9542	243158626	210933	4.61058e+07	12.9327	5.31863e-08	5.31863
		SIP_5_Bin32	5mSIPHEX1_32_scaffold_741_c1	5mSIPHEX1	3565054	16029	5mSIPHEX1	12.1703	243158626	195078	4.61058e+07	12.9327	5.31863e-08	5.31863
		SIP_5_Bin32	5mSIPHEX1_32_scaffold_757_c1	5mSIPHEX1	3565054	15629	5mSIPHEX1	15.8172	243158626	247207	4.61058e+07	12.9327	5.31863e-08	5.31863
		SIP_5_Bin32	5mSIPHEX1_32_scaffold_760_c1	5mSIPHEX1	3565054	15613	5mSIPHEX1	13.2143	243158626	206315	4.61058e+07	12.9327	5.31863e-08	5.31863
		SIP_5_Bin32	5mSIPHEX1_32_scaffold_762_c1	5mSIPHEX1	3565054	15566	5mSIPHEX1	13.4185	243158626	208872	4.61058e+07	12.9327	5.31863e-08	5.31863
		SIP_5_Bin32	5mSIPHEX1_32_scaffold_781_c1	5mSIPHEX1	3565054	15120	5mSIPHEX1	12.5829	243158626	190253	4.61058e+07	12.9327	5.31863e-08	5.31863
		SIP_5_Bin32	5mSIPHEX1_32_scaffold_791_c1	5mSIPHEX1	3565054	14937	5mSIPHEX1	13.064	243158626	195137	4.61058e+07	12.9327	5.31863e-08	5.31863
		SIP_5_Bin32	5mSIPHEX1_32_scaffold_810_c1	5mSIPHEX1	3565054	14461	5mSIPHEX1	14.2139	243158626	205547	4.61058e+07	12.9327	5.31863e-08	5.31863
		SIP_5_Bin32	5mSIPHEX1_32_scaffold_623_c2	5mSIPHEX1	3565054	14295	5mSIPHEX1	11.7421	243158626	167853	4.61058e+07	12.9327	5.31863e-08	5.31863
		SIP_5_Bin32	5mSIPHEX1_32_scaffold_824_c1	5mSIPHEX1	3565054	14254	5mSIPHEX1	10.0688	243158626	143521	4.61058e+07	12.9327	5.31863e-08	5.31863
		SIP_5_Bin32	5mSIPHEX1_32_scaffold_827_c1	5mSIPHEX1	3565054	14191	5mSIPHEX1	13.1863	243158626	187127	4.61058e+07	12.9327	5.31863e-08	5.31863
		SIP_5_Bin32	5mSIPHEX1_32_scaffold_840_c1	5mSIPHEX1	3565054	13883	5mSIPHEX1	13.668	243158626	189753	4.61058e+07	12.9327	5.31863e-08	5.31863
		SIP_5_Bin32	5mSIPHEX1_32_scaffold_163_c1	5mSIPHEX1	3565054	13827	5mSIPHEX1	12.6983	243158626	175579	4.61058e+07	12.9327	5.31863e-08	5.31863
		SIP_5_Bin32	5mSIPHEX1_32_scaffold_645_c1	5mSIPHEX1	3565054	13234	5mSIPHEX1	11.0994	243158626	146889	4.61058e+07	12.9327	5.31863e-08	5.31863
		SIP_5_Bin32	5mSIPHEX1_32_scaffold_896_c1	5mSIPHEX1	3565054	12954	5mSIPHEX1	11.3293	243158626	146760	4.61058e+07	12.9327	5.31863e-08	5.31863
		SIP_5_Bin32	5mSIPHEX1_32_scaffold_904_c1	5mSIPHEX1	3565054	12843	5mSIPHEX1	10.1312	243158626	130115	4.61058e+07	12.9327	5.31863e-08	5.31863
		SIP_5_Bin32	5mSIPHEX1_32_scaffold_861_c1	5mSIPHEX1	3565054	12562	5mSIPHEX1	9.2496	243158626	116193	4.61058e+07	12.9327	5.31863e-08	5.31863
		SIP_5_Bin32	5mSIPHEX1_32_scaffold_934_c1	5mSIPHEX1	3565054	12344	5mSIPHEX1	11.6315	243158626	143579	4.61058e+07	12.9327	5.31863e-08	5.31863
		SIP_5_Bin32	5mSIPHEX1_32_scaffold_962_c1	5mSIPHEX1	3565054	11862	5mSIPHEX1	11.4777	243158626	136148	4.61058e+07	12.9327	5.31863e-08	5.31863
		SIP_5_Bin32	5mSIPHEX1_32_scaffold_963_c1	5mSIPHEX1	3565054	11834	5mSIPHEX1	11.9538	243158626	141461	4.61058e+07	12.9327	5.31863e-08	5.31863
		SIP_5_Bin32	5mSIPHEX1_32_scaffold_979_c1	5mSIPHEX1	3565054	11643	5mSIPHEX1	14.9695	243158626	174290	4.61058e+07	12.9327	5.31863e-08	5.31863
		SIP_5_Bin32	5mSIPHEX1_32_scaffold_863_c2	5mSIPHEX1	3565054	11624	5mSIPHEX1	13.7769	243158626	160143	4.61058e+07	12.9327	5.31863e-08	5.31863
		SIP_5_Bin32	5mSIPHEX1_32_scaffold_1001_c1	5mSIPHEX1	3565054	11360	5mSIPHEX1	10.7121	243158626	121689	4.61058e+07	12.9327	5.31863e-08	5.31863
		SIP_5_Bin32	5mSIPHEX1_32_scaffold_1006_c1	5mSIPHEX1	3565054	11285	5mSIPHEX1	10.6794	243158626	120517	4.61058e+07	12.9327	5.31863e-08	5.31863
		SIP_5_Bin32	5mSIPHEX1_32_scaffold_1014_c1	5mSIPHEX1	3565054	11158	5mSIPHEX1	8.10792	243158626	90468.2	4.61058e+07	12.9327	5.31863e-08	5.31863
		SIP_5_Bin32	5mSIPHEX1_32_scaffold_1028_c1	5mSIPHEX1	3565054	11018	5mSIPHEX1	13.2223	243158626	145683	4.61058e+07	12.9327	5.31863e-08	5.31863
		SIP_5_Bin32	5mSIPHEX1_32_scaffold_1092_c1	5mSIPHEX1	3565054	10350	5mSIPHEX1	11.1214	243158626	115106	4.61058e+07	12.9327	5.31863e-08	5.31863
		SIP_5_Bin32	5mSIPHEX1_32_scaffold_1102_c1	5mSIPHEX1	3565054	10283	5mSIPHEX1	14.092	243158626	144908	4.61058e+07	12.9327	5.31863e-08	5.31863
		SIP_5_Bin32	5mSIPHEX1_32_scaffold_1046_c1	5mSIPHEX1	3565054	9807	5mSIPHEX1	9.61085	243158626	94253.6	4.61058e+07	12.9327	5.31863e-08	5.31863
		SIP_5_Bin32	5mSIPHEX1_32_scaffold_1201_c1	5mSIPHEX1	3565054	9461	5mSIPHEX1	12.2203	243158626	115616	4.61058e+07	12.9327	5.31863e-08	5.31863
		SIP_5_Bin32	5mSIPHEX1_32_scaffold_1251_c1	5mSIPHEX1	3565054	9114	5mSIPHEX1	13.7275	243158626	125112	4.61058e+07	12.9327	5.31863e-08	5.31863
		SIP_5_Bin32	5mSIPHEX1_32_scaffold_1260_c1	5mSIPHEX1	3565054	9051	5mSIPHEX1	14.0385	243158626	127062	4.61058e+07	12.9327	5.31863e-08	5.31863
		SIP_5_Bin32	5mSIPHEX1_32_scaffold_1318_c1	5mSIPHEX1	3565054	8703	5mSIPHEX1	15.7673	243158626	137223	4.61058e+07	12.9327	5.31863e-08	5.31863
		SIP_5_Bin32	5mSIPHEX1_32_scaffold_1386_c1	5mSIPHEX1	3565054	8301	5mSIPHEX1	9.01411	243158626	74826.1	4.61058e+07	12.9327	5.31863e-08	5.31863
		SIP_5_Bin32	5mSIPHEX1_32_scaffold_1298_c1	5mSIPHEX1	3565054	8175	5mSIPHEX1	13.9954	243158626	114412	4.61058e+07	12.9327	5.31863e-08	5.31863
		SIP_5_Bin32	5mSIPHEX1_32_scaffold_1453_c1	5mSIPHEX1	3565054	7837	5mSIPHEX1	8.72824	243158626	68403.2	4.61058e+07	12.9327	5.31863e-08	5.31863
		SIP_5_Bin32	5mSIPHEX1_32_scaffold_1466_c1	5mSIPHEX1	3565054	7756	5mSIPHEX1	12.4879	243158626	96856.2	4.61058e+07	12.9327	5.31863e-08	5.31863
[truncated: 2,329 more rows]
