# Supplementary material for: Novel hydrocarbon-degradation pathways in uncultured bacteria in industrial-impacted ocean waters
Source: Research Square preprint supplement (doi:10.21203/rs.3.rs-2060586/v1), 2022-09-16
Supplement: Supplementary file 2 [file 2407e0e557b73b32c1b8e155.xlsx]

## Sheet: Sp2
	Supplementary Table 2. Sequencing data and reports from JGI. The first column indicates the site where the samples were taken, followed by the SIP experiment characteristics and each metagenome's sample name. The following columns indicate the type of file and its size. For some types of files, the number of sequences is also shown.
		Sampling site			SIP experiemnt	Sample name	Type of file	Size (Megabyte)	Number of sequences	JGI path
	1	Sea surface	5m depth	water	13C-hexadecane	5mSIP-HEX-1MG	RawRead	86000	247338200	https://img.jgi.doe.gov/cgi-bin/mer/main.cgi?section=TaxonDetail&page=taxonDetail&taxon_oid=3300039448
	2	Sea surface	5m depth	water	13C-hexadecane	5mSIP-HEX-1MG	Assembly	132	94698	https://img.jgi.doe.gov/cgi-bin/mer/main.cgi?section=TaxonDetail&page=taxonDetail&taxon_oid=3300039448
	3	Sea surface	5m depth	water	13C-hexadecane	5mSIP-HEX-1MG	QC report pdf	0.228	NA	https://img.jgi.doe.gov/cgi-bin/mer/main.cgi?section=TaxonDetail&page=taxonDetail&taxon_oid=3300039448
	4	Sea surface	5m depth	water	13C-hexadecane	5mSIP-HEX-1MG	Several files with the information about the filter of the raw reads	NA	NA	https://img.jgi.doe.gov/cgi-bin/mer/main.cgi?section=TaxonDetail&page=taxonDetail&taxon_oid=3300039448
	5	Sea surface	5m depth	water	13C-hexadecane	5mSIP-HEX-1MG	Several tables related to the quality of rawreads and the metagenome assembly	NA	NA	https://img.jgi.doe.gov/cgi-bin/mer/main.cgi?section=TaxonDetail&page=taxonDetail&taxon_oid=3300039448
	6	Sea surface	5m depth	water	13C-hexadecane	5mSIP-HEX-1MG	Filtered reads	84000	243158626	https://img.jgi.doe.gov/cgi-bin/mer/main.cgi?section=TaxonDetail&page=taxonDetail&taxon_oid=3300039448
	7	Sea surface	5m depth	water	13C-hexadecane	5mSIP-HEX-1MG	QC report pdf	NA	NA	https://img.jgi.doe.gov/cgi-bin/mer/main.cgi?section=TaxonDetail&page=taxonDetail&taxon_oid=3300039448
	8	Sea surface	5m depth	water	13C-hexadecane	5mSIP-HEX-1MG	Files associated with anotation	NA	NA	https://img.jgi.doe.gov/cgi-bin/mer/main.cgi?section=TaxonDetail&page=taxonDetail&taxon_oid=3300039448
	9	Sea surface	5m depth	water	13C-hexadecane	5mSIP-HEX-2MG	RawRead	135000	391091930	https://img.jgi.doe.gov/cgi-bin/mer/main.cgi?section=TaxonDetail&page=taxonDetail&taxon_oid=3300039456
	10	Sea surface	5m depth	water	13C-hexadecane	5mSIP-HEX-2MG	Assembly	107	86364	https://img.jgi.doe.gov/cgi-bin/mer/main.cgi?section=TaxonDetail&page=taxonDetail&taxon_oid=3300039456
	11	Sea surface	5m depth	water	13C-hexadecane	5mSIP-HEX-2MG	QC report pdf	NA	NA	https://img.jgi.doe.gov/cgi-bin/mer/main.cgi?section=TaxonDetail&page=taxonDetail&taxon_oid=3300039456
	12	Sea surface	5m depth	water	13C-hexadecane	5mSIP-HEX-2MG	QC report pdf	NA	NA	https://img.jgi.doe.gov/cgi-bin/mer/main.cgi?section=TaxonDetail&page=taxonDetail&taxon_oid=3300039456
	13	Sea surface	5m depth	water	13C-hexadecane	5mSIP-HEX-2MG	Several files with the information about the filter of the raw reads	NA	NA	https://img.jgi.doe.gov/cgi-bin/mer/main.cgi?section=TaxonDetail&page=taxonDetail&taxon_oid=3300039456
	14	Sea surface	5m depth	water	13C-hexadecane	5mSIP-HEX-2MG	Several tables related to the quality of rawreads and the metagenome assembly	NA	NA	https://img.jgi.doe.gov/cgi-bin/mer/main.cgi?section=TaxonDetail&page=taxonDetail&taxon_oid=3300039456
	15	Sea surface	5m depth	water	13C-hexadecane	5mSIP-HEX-2MG	Filtered reads	132000	382227582	https://img.jgi.doe.gov/cgi-bin/mer/main.cgi?section=TaxonDetail&page=taxonDetail&taxon_oid=3300039456
	16	Sea surface	5m depth	water	13C-hexadecane	5mSIP-HEX-2MG	Files associated with anotation	NA	NA	https://img.jgi.doe.gov/cgi-bin/mer/main.cgi?section=TaxonDetail&page=taxonDetail&taxon_oid=3300039456
	17	Subsurface	700m depth	water	13C-hexadecane	700mSIP-HEX-1MG	RawRead	84000	240663562	https://img.jgi.doe.gov/cgi-bin/mer/main.cgi?section=TaxonDetail&page=taxonDetail&taxon_oid=3300039449
	18	Subsurface	700m depth	water	13C-hexadecane	700mSIP-HEX-1MG	Assembly	96	44797	https://img.jgi.doe.gov/cgi-bin/mer/main.cgi?section=TaxonDetail&page=taxonDetail&taxon_oid=3300039449
	19	Subsurface	700m depth	water	13C-hexadecane	700mSIP-HEX-1MG	QC report pdf	NA	NA	https://img.jgi.doe.gov/cgi-bin/mer/main.cgi?section=TaxonDetail&page=taxonDetail&taxon_oid=3300039449
	20	Subsurface	700m depth	water	13C-hexadecane	700mSIP-HEX-1MG	QC report pdf	NA	NA	https://img.jgi.doe.gov/cgi-bin/mer/main.cgi?section=TaxonDetail&page=taxonDetail&taxon_oid=3300039449
	21	Subsurface	700m depth	water	13C-hexadecane	700mSIP-HEX-1MG	Several files with the information about the filter of the raw reads	NA	NA	https://img.jgi.doe.gov/cgi-bin/mer/main.cgi?section=TaxonDetail&page=taxonDetail&taxon_oid=3300039449
	22	Subsurface	700m depth	water	13C-hexadecane	700mSIP-HEX-1MG	Several tables related to the quality of rawreads and the metagenome assembly	NA	NA	https://img.jgi.doe.gov/cgi-bin/mer/main.cgi?section=TaxonDetail&page=taxonDetail&taxon_oid=3300039449
	23	Subsurface	700m depth	water	13C-hexadecane	700mSIP-HEX-1MG	Filtered reads	81000	235445848	https://img.jgi.doe.gov/cgi-bin/mer/main.cgi?section=TaxonDetail&page=taxonDetail&taxon_oid=3300039449
	24	Subsurface	701m depth	water	14C-hexadecane	701mSIP-HEX-1MG	Files associated with anotation	NA	NA	https://img.jgi.doe.gov/cgi-bin/mer/main.cgi?section=TaxonDetail&page=taxonDetail&taxon_oid=3300039449
	25	Subsurface	700m depth	water	13C-hexadecane	700mSIP-HEX-2MG	RawRead	116000	335328978	https://img.jgi.doe.gov/cgi-bin/mer/main.cgi?section=TaxonDetail&page=taxonDetail&taxon_oid=3300040958
	26	Subsurface	700m depth	water	13C-hexadecane	700mSIP-HEX-2MG	Assembly	92	44779	https://img.jgi.doe.gov/cgi-bin/mer/main.cgi?section=TaxonDetail&page=taxonDetail&taxon_oid=3300040958
	27	Subsurface	700m depth	water	13C-hexadecane	700mSIP-HEX-2MG	QC report pdf	NA	NA	https://img.jgi.doe.gov/cgi-bin/mer/main.cgi?section=TaxonDetail&page=taxonDetail&taxon_oid=3300040958
	28	Subsurface	700m depth	water	13C-hexadecane	700mSIP-HEX-2MG	QC report pdf	NA	NA	https://img.jgi.doe.gov/cgi-bin/mer/main.cgi?section=TaxonDetail&page=taxonDetail&taxon_oid=3300040958
	29	Subsurface	700m depth	water	13C-hexadecane	700mSIP-HEX-2MG	Several files with the information about the filter of the raw reads	NA	NA	https://img.jgi.doe.gov/cgi-bin/mer/main.cgi?section=TaxonDetail&page=taxonDetail&taxon_oid=3300040958
	30	Subsurface	700m depth	water	13C-hexadecane	700mSIP-HEX-2MG	Several tables related to the quality of rawreads and the metagenome assembly	NA	NA	https://img.jgi.doe.gov/cgi-bin/mer/main.cgi?section=TaxonDetail&page=taxonDetail&taxon_oid=3300040958
	31	Subsurface	700m depth	water	13C-hexadecane	700mSIP-HEX-2MG	Filtered reads	114000	330280538	https://img.jgi.doe.gov/cgi-bin/mer/main.cgi?section=TaxonDetail&page=taxonDetail&taxon_oid=3300040958
	32	Subsurface	700m depth	water	13C-hexadecane	700mSIP-HEX-2MG	Files associated with anotation	NA	NA	https://img.jgi.doe.gov/cgi-bin/mer/main.cgi?section=TaxonDetail&page=taxonDetail&taxon_oid=3300040958
