# Supplementary material for: Novel hydrocarbon-degradation pathways in uncultured bacteria in industrial-impacted ocean waters
Source: Research Square preprint supplement (doi:10.21203/rs.3.rs-2060586/v1), 2022-09-16
Supplement: Supplementary file 3 [file a2e84fae6fa0232426a70aaa.xlsx]

## Sheet: Sp3
			Supplementary Table 3. MAGs statistics. The first panel shows genome characteristics, such as genome size, GC content, the number of coding sequences predicted, and the depth from where the genome was obtained. In the second panel, we showed the CheckM results for each MAG. The first column indicates MAG ids; the rest represent the number of marker genes identified and the number of copies of the…
			Bin name	Genome size	GC	Number of coding sequences	Depth		Marker	Lineage	Number of genomes	Number of markers	Number of marker sets	0	1	2	3	4	5	Completeness	Contamination	Strain heterogeneity
		1	SIP2_5_Bin18	3658615	0.549987	3449	Depth_5_meters		c__Gammaproteobacteria	(UID4444)	263	505	231	108	349	48	0	0	0	82.06	8.66	22.92
		2	SIP2_5_Bin10	3135274	0.641681	2912	Depth_5_meters		c__Gammaproteobacteria	(UID4444)	263	506	232	1	503	2	0	0	0	99.89	0.22	0
		3	SIP1_5_Bin18	2912263	0.470416	2789	Depth_5_meters		c__Gammaproteobacteria	(UID4443)	356	448	269	45	384	19	0	0	0	96.31	5.29	84.21
		4	SIP1_5_Bin10	4313497	0.568622	3944	Depth_5_meters		f__Rhodobacteraceae	(UID3356)	67	616	330	25	589	2	0	0	0	97.58	0.45	0
		5	SIP_700_Bin9	3178790	0.679185	3132	Depth_700_meters		f__Rhodobacteraceae	(UID3340)	84	568	330	4	562	2	0	0	0	99.09	0.4	0
		6	SIP_700_Bin8	4061898	0.584441	3851	Depth_700_meters		f__Rhodobacteraceae	(UID3375)	32	625	283	6	619	0	0	0	0	99.02	0	0
		7	SIP_700_Bin3	4239060	0.570339	3875	Depth_700_meters		c__Gammaproteobacteria	(UID4444)	263	506	232	1	504	1	0	0	0	99.89	0.07	0
		8	SIP_700_Bin24	2571546	0.565181	2357	Depth_700_meters		c__Gammaproteobacteria	(UID4444)	263	506	232	130	375	1	0	0	0	68.53	0.07	0
		9	SIP_700_Bin23	3464572	0.405134	3133	Depth_700_meters		s__algicola	(UID2847)	33	496	263	4	492	0	0	0	0	98.48	0	0
		10	SIP_700_Bin22	3975403	0.44302	3487	Depth_700_meters		c__Gammaproteobacteria	(UID4761)	52	693	297	27	655	11	0	0	0	98.18	1.38	45.45
		11	SIP_700_Bin21	3786831	0.464415	3461	Depth_700_meters		c__Gammaproteobacteria	(UID4444)	263	505	231	24	475	6	0	0	0	98.33	1.73	0
		12	SIP_700_Bin20	3668711	0.56872	3362	Depth_700_meters		c__Gammaproteobacteria	(UID4443)	356	448	269	0	446	2	0	0	0	100	0.37	100
		13	SIP_700_Bin2	4000208	0.441717	3491	Depth_700_meters		c__Gammaproteobacteria	(UID4761)	52	693	297	37	649	7	0	0	0	98.47	1.01	42.86
		14	SIP_700_Bin18	4300731	0.423417	3823	Depth_700_meters		c__Gammaproteobacteria	(UID4761)	52	693	297	1	689	3	0	0	0	99.89	0.84	0
		15	SIP_700_Bin17	3544363	0.326459	3245	Depth_700_meters		s__algicola	(UID2846)	47	571	303	1	569	1	0	0	0	99.67	0.17	0
		16	SIP_700_Bin16	4292674	0.423825	3806	Depth_700_meters		c__Gammaproteobacteria	(UID4761)	52	693	297	1	689	3	0	0	0	99.89	0.84	0
		17	SIP_700_Bin15	3787977	0.464198	3460	Depth_700_meters		c__Gammaproteobacteria	(UID4444)	263	505	231	24	475	6	0	0	0	98.33	1.73	0
		18	SIP_700_Bin14	3545922	0.327054	3244	Depth_700_meters		s__algicola	(UID2846)	47	571	303	1	569	1	0	0	0	99.67	0.17	0
		19	SIP_700_Bin13	4051957	0.584312	3841	Depth_700_meters		f__Rhodobacteraceae	(UID3375)	32	625	283	6	619	0	0	0	0	99.02	0	0
		20	SIP_700_Bin12	3645291	0.405503	3285	Depth_700_meters		s__algicola	(UID2847)	33	496	263	4	492	0	0	0	0	98.48	0	0
		21	SIP_700_Bin1	3417584	0.67772	3325	Depth_700_meters		f__Rhodobacteraceae	(UID3340)	84	568	330	2	565	1	0	0	0	99.39	0.3	0
		22	SIP_700_Bin0	1881949	0.620787	2122	Depth_700_meters		f__Rhodobacteraceae	(UID3360)	56	582	313	281	294	7	0	0	0	51.99	1.49	71.43
		23	SIP_5_Bin9	2640130	0.429886	2625	Depth_5_meters		c__Gammaproteobacteria	(UID4761)	52	693	297	203	461	28	1	0	0	67.98	4.49	29.03
		24	SIP_5_Bin8	4631884	0.565655	4717	Depth_5_meters		f__Rhodobacteraceae	(UID3360)	56	582	313	3	561	18	0	0	0	99.5	3.25	11.11
		25	SIP_5_Bin7	2883122	0.556416	2867	Depth_5_meters		f__Rhodobacteraceae	(UID3360)	56	582	313	4	576	2	0	0	0	98.94	0.17	0
		26	SIP_5_Bin5	3352085	0.46903	3090	Depth_5_meters		c__Gammaproteobacteria	(UID4444)	263	505	231	47	428	30	0	0	0	89.96	5.35	10
		27	SIP_5_Bin37	4467123	0.586164	4304	Depth_5_meters		f__Rhodobacteraceae	(UID3375)	32	625	283	8	617	0	0	0	0	98.68	0	0
		28	SIP_5_Bin33	2704863	0.590269	2702	Depth_5_meters		c__Alphaproteobacteria	(UID3422)	26	529	308	144	380	5	0	0	0	80.33	0.87	60
		29	SIP_5_Bin32	3565054	0.599202	3473	Depth_5_meters		c__Alphaproteobacteria	(UID3422)	26	529	308	48	473	8	0	0	0	96.52	1.67	25
		30	SIP_5_Bin3	4374768	0.587911	4225	Depth_5_meters		f__Rhodobacteraceae	(UID3375)	32	625	283	25	600	0	0	0	0	97.98	0	0
		31	SIP_5_Bin26	1763553	0.305823	1999	Depth_5_meters		f__Flavobacteriaceae	(UID2817)	81	511	283	115	393	3	0	0	0	76.56	0.59	0
		32	SIP_5_Bin25_sub	3510082	0.546848	3259	Depth_5_meters		c__Gammaproteobacteria	(UID4443)	356	448	269	28	420	0	0	0	0	99.66	0	0
		33	SIP_5_Bin25	4021848	0.573667	4169	Depth_5_meters		f__Rhodobacteraceae	(UID3360)	56	582	313	4	559	19	0	0	0	99.33	2.84	26.32
		34	SIP_5_Bin2	2677491	0.49045	2455	Depth_5_meters		c__Gammaproteobacteria	(UID4443)	356	451	270	1	447	3	0	0	0	99.81	0.62	0
		35	SIP_5_Bin19	3431868	0.465413	3148	Depth_5_meters		c__Gammaproteobacteria	(UID4444)	263	505	231	67	432	6	0	0	0	90.82	1.41	0
		36	SIP_5_Bin16	2107131	0.301608	2143	Depth_5_meters		f__Flavobacteriaceae	(UID2817)	81	511	283	49	458	4	0	0	0	87.91	1.18	0
		37	SIP_5_Bin15	3136236	0.525934	3199	Depth_5_meters		c__Alphaproteobacteria	(UID3422)	26	529	308	9	520	0	0	0	0	97.99	0	0
		38	SIP_5_Bin13	2886452	0.553395	2854	Depth_5_meters		f__Rhodobacteraceae	(UID3360)	56	582	313	4	576	2	0	0	0	98.94	0.17	0
		39	SIP_5_Bin11	3514585	0.585717	3227	Depth_5_meters		c__Gammaproteobacteria	(UID4443)	356	448	269	0	447	1	0	0	0	100	0.37	0
		40	SIP_5_Bin1	1922336	0.553361	2170	Depth_5_meters		f__Rhodobacteraceae	(UID3356)	67	615	329	114	491	10	0	0	0	79.82	1.88	100
		41	SIP_5_Bin0	3292271	0.644882	3065	Depth_5_meters		f__Rhodobacteraceae	(UID3356)	67	616	330	5	607	4	0	0	0	98.48	0.76	0
		42	SIP_5_2.B14	4876121	0.567487	4512	Depth_5_meters		c__Gammaproteobacteria	(UID4444)	263	506	232	0	482	24	0	0	0	100	6.21	8.33
