# Supplementary material for: Novel hydrocarbon-degradation pathways in uncultured bacteria in industrial-impacted ocean waters
Source: Research Square preprint supplement (doi:10.21203/rs.3.rs-2060586/v1), 2022-09-16
Supplement: Supplementary file 4 [file a5fff65a3c2421993710d64d.xlsx]

## Sheet: Sp5
		Supplementary Table 5. GTDB-tk taxonomy output. The first column indicates the taxonomy inferred by the program. The following columns show each bin's relation with the closest reference genomes, including the classification method.
			Bin name	Domain	Phylum	Class	Order	Family	Genus	Species	Fastani reference	Fastani reference radius	Fastani taxonomy	Fastani ani	Fastani af	Closest placement reference	Closest placement taxonomy	Closest placement ani	Closest placement af	Pplacer taxonomy	Classification method	Note	Other related references	Aa percent	Translation table	Red value	Warnings
		1	SIP2_5_Bin18	d__Bacteria	p__Proteobacteria	c__Gammaproteobacteria	o__Pseudomonadales	f__Saccharospirillaceae	g__Oleibacter	s__Oleibacter sp002733645	GCA_002733645.1	95.0	d__Bacteria;p__Proteobacteria;c__Gammaproteobacteria;o__Pseudomonadales;f__Saccharospirillaceae;g__Oleibacter;s__Oleibacter sp002733645	98.71	0.81	GCA_002733645.1	d__Bacteria;p__Proteobacteria;c__Gammaproteobacteria;o__Pseudomonadales;f__Saccharospirillaceae;g__Oleibacter;s__Oleibacter sp002733645	98.71	0.81	d__Bacteria;p__Proteobacteria;c__Gammaproteobacteria;o__Pseudomonadales;f__Saccharospirillaceae;g__Oleibacter;s__	ANI/Placement	topological placement and ANI have congruent species assignments	---	71.98	11	---	Genome has more than 10.0% of markers with multiple hits
		2	SIP2_5_Bin10	d__Bacteria	p__Proteobacteria	c__Gammaproteobacteria	o__Pseudomonadales	f__Oleiphilaceae	g__Marinobacter	s__Marinobacter salarius	GCF_000831005.1	95.0	d__Bacteria;p__Proteobacteria;c__Gammaproteobacteria;o__Pseudomonadales;f__Oleiphilaceae;g__Marinobacter;s__Marinobacter salarius	98.74	0.93	GCF_000831005.1	d__Bacteria;p__Proteobacteria;c__Gammaproteobacteria;o__Pseudomonadales;f__Oleiphilaceae;g__Marinobacter;s__Marinobacter salarius	98.74	0.93	d__Bacteria;p__Proteobacteria;c__Gammaproteobacteria;o__Pseudomonadales;f__Oleiphilaceae;g__Marinobacter;s__	ANI/Placement	topological placement and ANI have congruent species assignments	GCA_002732725.1, s__Marinobacter sp002732725, 95.0, 92.77, 0.84; GCF_000170835.1, s__Marinobacter algicola, 95.0, 92.68, 0.83; GCA_002726615.1, s__Marinobacter sp002726615, 95.0, 92.07, 0.81; GCF_000686085.1, s__Marinobacter sp000686085, 95.0, 82.19, 0.59; GCF_000235625.1, s__Marinobacter manganoxydans, 96.59, 80.27, 0.4; GCA_003030785.1, s__Marinobacter sp003030785, 95.0, 80.27, 0.4; GCF_0016509…	99.21	11	---	---
		3	SIP1_5_Bin18	d__Bacteria	p__Proteobacteria	c__Gammaproteobacteria	o__Pseudomonadales	f__Alcanivoracaceae	g__Alcanivorax	s__	---	---	---	---	---	GCF_000009365.1	d__Bacteria;p__Proteobacteria;c__Gammaproteobacteria;o__Pseudomonadales;f__Alcanivoracaceae;g__Alcanivorax;s__Alcanivorax borkumensis	92.9	0.82	d__Bacteria;p__Proteobacteria;c__Gammaproteobacteria;o__Pseudomonadales;f__Alcanivoracaceae;g__Alcanivorax;s__	Placement	taxonomic classification fully defined by topology	GCF_000155615.1, s__Alcanivorax sp000155615, 95.0, 83.77, 0.72; GCA_002726155.1, s__Alcanivorax sp002726155, 95.0, 83.36, 0.66; GCA_002733835.1, s__Alcanivorax sp002733835, 95.0, 83.19, 0.66; GCF_900107995.1, s__Alcanivorax sp900107995, 95.0, 80.69, 0.49; GCF_000756655.1, s__Alcanivorax jadensis, 95.0, 80.08, 0.48; GCF_000300995.1, s__Alcanivorax hongdengensis, 95.0, 79.82, 0.39; GCF_000756665.1,…	80.1	11	0.995542788057	---
		4	SIP1_5_Bin10	d__Bacteria	p__Proteobacteria	c__Alphaproteobacteria	o__Rhodobacterales	f__Rhodobacteraceae	g__Celeribacter_B	s__	---	---	---	---	---	GCF_002504165.1	d__Bacteria;p__Proteobacteria;c__Alphaproteobacteria;o__Rhodobacterales;f__Rhodobacteraceae;g__Celeribacter_B;s__Celeribacter_B manganoxidans	87.29	0.85	d__Bacteria;p__Proteobacteria;c__Alphaproteobacteria;o__Rhodobacterales;f__Rhodobacteraceae;g__;s__	Placement	taxonomic novelty determined using RED	---	92.28	11	0.992067759596	---
		5	SIP_700_Bin9	d__Bacteria	p__Proteobacteria	c__Alphaproteobacteria	o__Rhodobacterales	f__Rhodobacteraceae	g__Paracoccus	s__Paracoccus sp000967825	GCF_000967825.1	95.0	d__Bacteria;p__Proteobacteria;c__Alphaproteobacteria;o__Rhodobacterales;f__Rhodobacteraceae;g__Paracoccus;s__Paracoccus sp000967825	97.73	0.98	GCF_000967825.1	d__Bacteria;p__Proteobacteria;c__Alphaproteobacteria;o__Rhodobacterales;f__Rhodobacteraceae;g__Paracoccus;s__Paracoccus sp000967825	97.73	0.98	d__Bacteria;p__Proteobacteria;c__Alphaproteobacteria;o__Rhodobacterales;f__Rhodobacteraceae;g__Paracoccus;s__	ANI/Placement	topological placement and ANI have congruent species assignments	GCF_000787695.1, s__Paracoccus sp000787695, 95.0, 91.8, 0.81; GCA_001724535.1, s__Paracoccus sp001724535, 95.0, 88.47, 0.8; GCF_001887735.1, s__Paracoccus sp001887735, 95.0, 84.29, 0.74; GCF_003255745.1, s__Paracoccus saliphilus_A, 95.0, 84.08, 0.72; GCF_000420145.1, s__Paracoccus zeaxanthinifaciens, 95.0, 83.76, 0.7; GCF_003056335.1, s__Paracoccus sp003056335, 95.0, 83.53, 0.74; GCF_900102505.1,…	97.88	11	---	---
		6	SIP_700_Bin8	d__Bacteria	p__Proteobacteria	c__Alphaproteobacteria	o__Rhodobacterales	f__Rhodobacteraceae	g__Pseudophaeobacter	s__	---	---	---	---	---	GCF_000473205.1	d__Bacteria;p__Proteobacteria;c__Alphaproteobacteria;o__Rhodobacterales;f__Rhodobacteraceae;g__Pseudophaeobacter;s__Pseudophaeobacter arcticus	89.66	0.87	d__Bacteria;p__Proteobacteria;c__Alphaproteobacteria;o__Rhodobacterales;f__Rhodobacteraceae;g__Pseudophaeobacter;s__	Placement	taxonomic classification fully defined by topology	GCA_900313025.1, s__Pseudophaeobacter sp900313025, 95.0, 84.94, 0.77; GCF_000152965.1, s__Pseudophaeobacter sp000152965, 95.0, 83.88, 0.74; GCF_001294455.1, s__Pseudophaeobacter sp001294455, 95.0, 83.85, 0.74; GCF_002087335.1, s__Pseudophaeobacter leonis, 95.0, 82.13, 0.67; GCF_001457775.1, s__Pseudophaeobacter sp001457775, 95.0, 81.71, 0.65; GCF_000169455.1, s__Pseudophaeobacter sp000169455, 95.…	97.1	11	0.997193193903	---
		7	SIP_700_Bin3	d__Bacteria	p__Proteobacteria	c__Gammaproteobacteria	o__Pseudomonadales	f__Oleiphilaceae	g__Marinobacter	s__Marinobacter salarius	GCF_000831005.1	95.0	d__Bacteria;p__Proteobacteria;c__Gammaproteobacteria;o__Pseudomonadales;f__Oleiphilaceae;g__Marinobacter;s__Marinobacter salarius	98.74	0.95	GCF_000831005.1	d__Bacteria;p__Proteobacteria;c__Gammaproteobacteria;o__Pseudomonadales;f__Oleiphilaceae;g__Marinobacter;s__Marinobacter salarius	98.74	0.95	d__Bacteria;p__Proteobacteria;c__Gammaproteobacteria;o__Pseudomonadales;f__Oleiphilaceae;g__Marinobacter;s__	ANI/Placement	topological placement and ANI have congruent species assignments	GCA_002732725.1, s__Marinobacter sp002732725, 95.0, 92.8, 0.84; GCF_000170835.1, s__Marinobacter algicola, 95.0, 92.64, 0.84; GCA_002726615.1, s__Marinobacter sp002726615, 95.0, 92.07, 0.81; GCF_000686085.1, s__Marinobacter sp000686085, 95.0, 82.24, 0.59; GCA_003030785.1, s__Marinobacter sp003030785, 95.0, 80.27, 0.4; GCF_000235625.1, s__Marinobacter manganoxydans, 96.59, 80.15, 0.42; GCF_0016509…	99.21	11	---	---
		8	SIP_700_Bin24	d__Bacteria	p__Proteobacteria	c__Gammaproteobacteria	o__Pseudomonadales	f__Oleiphilaceae	g__Marinobacter	s__Marinobacter salarius	GCF_000831005.1	95.0	d__Bacteria;p__Proteobacteria;c__Gammaproteobacteria;o__Pseudomonadales;f__Oleiphilaceae;g__Marinobacter;s__Marinobacter salarius	98.87	0.95	GCF_000831005.1	d__Bacteria;p__Proteobacteria;c__Gammaproteobacteria;o__Pseudomonadales;f__Oleiphilaceae;g__Marinobacter;s__Marinobacter salarius	98.87	0.95	d__Bacteria;p__Proteobacteria;c__Gammaproteobacteria;o__Pseudomonadales;f__Oleiphilaceae;g__Marinobacter;s__	ANI/Placement	topological placement and ANI have congruent species assignments	GCF_000170835.1, s__Marinobacter algicola, 95.0, 92.68, 0.84; GCA_002732725.1, s__Marinobacter sp002732725, 95.0, 92.06, 0.41; GCA_002726615.1, s__Marinobacter sp002726615, 95.0, 91.93, 0.5; GCF_000686085.1, s__Marinobacter sp000686085, 95.0, 82.16, 0.6; GCF_000235625.1, s__Marinobacter manganoxydans, 96.59, 80.3, 0.42; GCF_001650915.1, s__Marinobacter sp001650915, 95.0, 80.19, 0.43; GCA_00303078…	76.87	11	---	---
		9	SIP_700_Bin23	d__Bacteria	p__Bacteroidota	c__Bacteroidia	o__Flavobacteriales	f__Flavobacteriaceae	g__Dokdonia	s__Dokdonia sp002712765	GCA_002712765.1	95.0	d__Bacteria;p__Bacteroidota;c__Bacteroidia;o__Flavobacteriales;f__Flavobacteriaceae;g__Dokdonia;s__Dokdonia sp002712765	99.16	0.92	GCA_002712765.1	d__Bacteria;p__Bacteroidota;c__Bacteroidia;o__Flavobacteriales;f__Flavobacteriaceae;g__Dokdonia;s__Dokdonia sp002712765	99.16	0.92	d__Bacteria;p__Bacteroidota;c__Bacteroidia;o__Flavobacteriales;f__Flavobacteriaceae;g__Dokdonia;s__	ANI/Placement	topological placement and ANI have congruent species assignments	---	97.54	11	---	---
		10	SIP_700_Bin22	d__Bacteria	p__Proteobacteria	c__Gammaproteobacteria	o__Enterobacterales	f__Alteromonadaceae	g__Alteromonas	s__Alteromonas sp000753865	GCF_000753865.1	95.0	d__Bacteria;p__Proteobacteria;c__Gammaproteobacteria;o__Enterobacterales;f__Alteromonadaceae;g__Alteromonas;s__Alteromonas sp000753865	95.41	0.9	GCA_002691125.1	d__Bacteria;p__Proteobacteria;c__Gammaproteobacteria;o__Enterobacterales;f__Alteromonadaceae;g__Alteromonas;s__Alteromonas sp002691125	95.14	0.82	d__Bacteria;p__Proteobacteria;c__Gammaproteobacteria;o__Enterobacterales;f__Alteromonadaceae;g__Alteromonas;s__	ANI	topological placement and ANI have incongruent species assignments	GCF_002831605.1, s__Alteromonas sp002831605, 95.0, 82.57, 0.58; GCF_000597705.1, s__Alteromonas sp000597705, 95.0, 79.53, 0.33; GCF_002993325.1, s__Alteromonas gracilis, 95.0, 79.51, 0.32; GCF_000020585.3, s__Alteromonas mediterranea, 95.0, 79.34, 0.34; GCF_000172635.2, s__Alteromonas macleodii, 95.0, 79.32, 0.33; GCF_001953635.1, s__Alteromonas abrolhosensis, 95.0, 79.27, 0.33; GCF_000808575.1, …	88.69	11	---	---
		11	SIP_700_Bin21	d__Bacteria	p__Proteobacteria	c__Gammaproteobacteria	o__Pseudomonadales	f__Saccharospirillaceae	g__Oleibacter	s__Oleibacter sp002733645	GCA_002733645.1	95.0	d__Bacteria;p__Proteobacteria;c__Gammaproteobacteria;o__Pseudomonadales;f__Saccharospirillaceae;g__Oleibacter;s__Oleibacter sp002733645	98.26	0.84	GCA_002733645.1	d__Bacteria;p__Proteobacteria;c__Gammaproteobacteria;o__Pseudomonadales;f__Saccharospirillaceae;g__Oleibacter;s__Oleibacter sp002733645	98.26	0.84	d__Bacteria;p__Proteobacteria;c__Gammaproteobacteria;o__Pseudomonadales;f__Saccharospirillaceae;g__Oleibacter;s__	ANI/Placement	topological placement and ANI have congruent species assignments	GCF_900156675.1, s__Oleibacter marinus, 95.0, 78.1, 0.21; GCA_002331105.1, s__Oleibacter sp002331105, 95.0, 78.02, 0.18	91.69	11	---	---
		12	SIP_700_Bin20	d__Bacteria	p__Proteobacteria	c__Gammaproteobacteria	o__Pseudomonadales	f__Alcanivoracaceae	g__Alcanivorax	s__	---	---	---	---	---	---	---	---	---	d__Bacteria;p__Proteobacteria;c__Gammaproteobacteria;o__Pseudomonadales;f__Alcanivoracaceae;g__Alcanivorax;s__	Placement	taxonomic classification fully defined by topology	GCF_000155615.1, s__Alcanivorax sp000155615, 95.0, 89.1, 0.86; GCA_002726155.1, s__Alcanivorax sp002726155, 95.0, 88.24, 0.84; GCA_002733835.1, s__Alcanivorax sp002733835, 95.0, 88.02, 0.81; GCF_000009365.1, s__Alcanivorax borkumensis, 95.0, 82.76, 0.74; GCF_000756655.1, s__Alcanivorax jadensis, 95.0, 81.78, 0.63; GCF_900107995.1, s__Alcanivorax sp900107995, 95.0, 81.48, 0.61; GCA_002706085.1, s_…	99.27	11	0.99031807739	---
		13	SIP_700_Bin2	d__Bacteria	p__Proteobacteria	c__Gammaproteobacteria	o__Enterobacterales	f__Alteromonadaceae	g__Alteromonas	s__Alteromonas sp000753865	GCF_000753865.1	95.0	d__Bacteria;p__Proteobacteria;c__Gammaproteobacteria;o__Enterobacterales;f__Alteromonadaceae;g__Alteromonas;s__Alteromonas sp000753865	95.35	0.91	GCA_002691125.1	d__Bacteria;p__Proteobacteria;c__Gammaproteobacteria;o__Enterobacterales;f__Alteromonadaceae;g__Alteromonas;s__Alteromonas sp002691125	95.16	0.82	d__Bacteria;p__Proteobacteria;c__Gammaproteobacteria;o__Enterobacterales;f__Alteromonadaceae;g__Alteromonas;s__	ANI	topological placement and ANI have incongruent species assignments	GCF_002831605.1, s__Alteromonas sp002831605, 95.0, 82.41, 0.58; GCF_000597705.1, s__Alteromonas sp000597705, 95.0, 79.43, 0.34; GCF_002993325.1, s__Alteromonas gracilis, 95.0, 79.36, 0.32; GCF_000020585.3, s__Alteromonas mediterranea, 95.0, 79.33, 0.33; GCF_000172635.2, s__Alteromonas macleodii, 95.0, 79.19, 0.33; GCF_001953635.1, s__Alteromonas abrolhosensis, 95.0, 79.14, 0.33; GCF_000808575.1, …	83.49	11	---	---
		14	SIP_700_Bin18	d__Bacteria	p__Proteobacteria	c__Gammaproteobacteria	o__Enterobacterales	f__Alteromonadaceae	g__Glaciecola	s__	---	---	---	---	---	---	---	---	---	d__Bacteria;p__Proteobacteria;c__Gammaproteobacteria;o__Enterobacterales;f__Alteromonadaceae;g__Glaciecola;s__	Placement	taxonomic classification fully defined by topology	---	99.56	11	0.968938916831	---
		15	SIP_700_Bin17	d__Bacteria	p__Bacteroidota	c__Bacteroidia	o__Flavobacteriales	f__Flavobacteriaceae	g__Olleya	s__Olleya sp002323495	GCA_002323495.1	95.0	d__Bacteria;p__Bacteroidota;c__Bacteroidia;o__Flavobacteriales;f__Flavobacteriaceae;g__Olleya;s__Olleya sp002323495	96.78	0.91	GCA_002323495.1	d__Bacteria;p__Bacteroidota;c__Bacteroidia;o__Flavobacteriales;f__Flavobacteriaceae;g__Olleya;s__Olleya sp002323495	96.78	0.91	d__Bacteria;p__Bacteroidota;c__Bacteroidia;o__Flavobacteriales;f__Flavobacteriaceae;g__Olleya;s__	ANI/Placement	topological placement and ANI have congruent species assignments	GCF_000518485.1, s__Olleya marilimosa, 95.0, 91.39, 0.89; GCF_900114005.1, s__Olleya namhaensis, 95.0, 83.76, 0.7; GCF_000518525.1, s__Olleya sp000518525, 95.0, 82.94, 0.68; GCF_002831645.1, s__Olleya sp002831645, 95.0, 82.52, 0.67; GCF_003259525.1, s__Olleya aquimaris, 95.0, 80.99, 0.67	98.47	11	---	---
		16	SIP_700_Bin16	d__Bacteria	p__Proteobacteria	c__Gammaproteobacteria	o__Enterobacterales	f__Alteromonadaceae	g__Glaciecola	s__	---	---	---	---	---	---	---	---	---	d__Bacteria;p__Proteobacteria;c__Gammaproteobacteria;o__Enterobacterales;f__Alteromonadaceae;g__Glaciecola;s__	Placement	taxonomic classification fully defined by topology	---	99.56	11	0.968938916831	---
		17	SIP_700_Bin15	d__Bacteria	p__Proteobacteria	c__Gammaproteobacteria	o__Pseudomonadales	f__Saccharospirillaceae	g__Oleibacter	s__Oleibacter sp002733645	GCA_002733645.1	95.0	d__Bacteria;p__Proteobacteria;c__Gammaproteobacteria;o__Pseudomonadales;f__Saccharospirillaceae;g__Oleibacter;s__Oleibacter sp002733645	98.23	0.84	GCA_002733645.1	d__Bacteria;p__Proteobacteria;c__Gammaproteobacteria;o__Pseudomonadales;f__Saccharospirillaceae;g__Oleibacter;s__Oleibacter sp002733645	98.23	0.84	d__Bacteria;p__Proteobacteria;c__Gammaproteobacteria;o__Pseudomonadales;f__Saccharospirillaceae;g__Oleibacter;s__	ANI/Placement	topological placement and ANI have congruent species assignments	GCF_900156675.1, s__Oleibacter marinus, 95.0, 78.12, 0.2; GCA_002331105.1, s__Oleibacter sp002331105, 95.0, 77.98, 0.18	91.69	11	---	---
		18	SIP_700_Bin14	d__Bacteria	p__Bacteroidota	c__Bacteroidia	o__Flavobacteriales	f__Flavobacteriaceae	g__Olleya	s__Olleya sp002323495	GCA_002323495.1	95.0	d__Bacteria;p__Bacteroidota;c__Bacteroidia;o__Flavobacteriales;f__Flavobacteriaceae;g__Olleya;s__Olleya sp002323495	96.77	0.91	GCA_002323495.1	d__Bacteria;p__Bacteroidota;c__Bacteroidia;o__Flavobacteriales;f__Flavobacteriaceae;g__Olleya;s__Olleya sp002323495	96.77	0.91	d__Bacteria;p__Bacteroidota;c__Bacteroidia;o__Flavobacteriales;f__Flavobacteriaceae;g__Olleya;s__	ANI/Placement	topological placement and ANI have congruent species assignments	GCF_000518485.1, s__Olleya marilimosa, 95.0, 91.38, 0.9; GCF_900114005.1, s__Olleya namhaensis, 95.0, 83.78, 0.7; GCF_000518525.1, s__Olleya sp000518525, 95.0, 82.93, 0.68; GCF_002831645.1, s__Olleya sp002831645, 95.0, 82.5, 0.66; GCF_003259525.1, s__Olleya aquimaris, 95.0, 81.01, 0.66	98.47	11	---	---
		19	SIP_700_Bin13	d__Bacteria	p__Proteobacteria	c__Alphaproteobacteria	o__Rhodobacterales	f__Rhodobacteraceae	g__Pseudophaeobacter	s__	---	---	---	---	---	GCF_000473205.1	d__Bacteria;p__Proteobacteria;c__Alphaproteobacteria;o__Rhodobacterales;f__Rhodobacteraceae;g__Pseudophaeobacter;s__Pseudophaeobacter arcticus	89.64	0.87	d__Bacteria;p__Proteobacteria;c__Alphaproteobacteria;o__Rhodobacterales;f__Rhodobacteraceae;g__Pseudophaeobacter;s__	Placement	taxonomic classification fully defined by topology	GCA_900313025.1, s__Pseudophaeobacter sp900313025, 95.0, 84.97, 0.78; GCF_000152965.1, s__Pseudophaeobacter sp000152965, 95.0, 83.9, 0.75; GCF_001294455.1, s__Pseudophaeobacter sp001294455, 95.0, 83.87, 0.74; GCF_002087335.1, s__Pseudophaeobacter leonis, 95.0, 82.18, 0.67; GCF_001457775.1, s__Pseudophaeobacter sp001457775, 95.0, 81.64, 0.63; GCF_000169455.1, s__Pseudophaeobacter sp000169455, 95.0…	97.1	11	0.997193193903	---
		20	SIP_700_Bin12	d__Bacteria	p__Bacteroidota	c__Bacteroidia	o__Flavobacteriales	f__Flavobacteriaceae	g__Dokdonia	s__Dokdonia sp002712765	GCA_002712765.1	95.0	d__Bacteria;p__Bacteroidota;c__Bacteroidia;o__Flavobacteriales;f__Flavobacteriaceae;g__Dokdonia;s__Dokdonia sp002712765	99.15	0.93	GCA_002712765.1	d__Bacteria;p__Bacteroidota;c__Bacteroidia;o__Flavobacteriales;f__Flavobacteriaceae;g__Dokdonia;s__Dokdonia sp002712765	99.15	0.93	d__Bacteria;p__Bacteroidota;c__Bacteroidia;o__Flavobacteriales;f__Flavobacteriaceae;g__Dokdonia;s__	ANI/Placement	topological placement and ANI have congruent species assignments	---	97.6	11	---	---
		21	SIP_700_Bin1	d__Bacteria	p__Proteobacteria	c__Alphaproteobacteria	o__Rhodobacterales	f__Rhodobacteraceae	g__Paracoccus	s__Paracoccus sp000967825	GCF_000967825.1	95.0	d__Bacteria;p__Proteobacteria;c__Alphaproteobacteria;o__Rhodobacterales;f__Rhodobacteraceae;g__Paracoccus;s__Paracoccus sp000967825	97.7	0.98	GCF_000967825.1	d__Bacteria;p__Proteobacteria;c__Alphaproteobacteria;o__Rhodobacterales;f__Rhodobacteraceae;g__Paracoccus;s__Paracoccus sp000967825	97.7	0.98	d__Bacteria;p__Proteobacteria;c__Alphaproteobacteria;o__Rhodobacterales;f__Rhodobacteraceae;g__Paracoccus;s__	ANI/Placement	topological placement and ANI have congruent species assignments	GCF_000787695.1, s__Paracoccus sp000787695, 95.0, 91.78, 0.8; GCA_001724535.1, s__Paracoccus sp001724535, 95.0, 88.34, 0.8; GCF_001887735.1, s__Paracoccus sp001887735, 95.0, 84.21, 0.73; GCF_003255745.1, s__Paracoccus saliphilus_A, 95.0, 84.1, 0.69; GCF_000420145.1, s__Paracoccus zeaxanthinifaciens, 95.0, 83.69, 0.72; GCF_003056335.1, s__Paracoccus sp003056335, 95.0, 83.51, 0.69; GCF_900102505.1,…	97.88	11	---	---
		22	SIP_700_Bin0	d__Bacteria	p__Proteobacteria	c__Alphaproteobacteria	o__Rhodobacterales	f__Rhodobacteraceae	g__Sulfitobacter	s__Sulfitobacter sp001634775	GCF_001634775.1	95.0	d__Bacteria;p__Proteobacteria;c__Alphaproteobacteria;o__Rhodobacterales;f__Rhodobacteraceae;g__Sulfitobacter;s__Sulfitobacter sp001634775	96.36	0.87	GCF_001634775.1	d__Bacteria;p__Proteobacteria;c__Alphaproteobacteria;o__Rhodobacterales;f__Rhodobacteraceae;g__Sulfitobacter;s__Sulfitobacter sp001634775	96.36	0.87	d__Bacteria;p__Proteobacteria;c__Alphaproteobacteria;o__Rhodobacterales;f__Rhodobacteraceae;g__Sulfitobacter;s__	ANI/Placement	topological placement and ANI have congruent species assignments	GCF_900113435.1, s__Sulfitobacter dubius, 95.0, 89.74, 0.81; GCF_001635605.1, s__Sulfitobacter sp001635605, 95.0, 89.2, 0.8; GCF_000172095.1, s__Sulfitobacter indolifex, 95.0, 87.86, 0.81; GCF_900102535.1, s__Sulfitobacter delicatus, 95.0, 85.02, 0.76; GCF_900106935.1, s__Sulfitobacter pontiacus, 95.0, 79.69, 0.5; GCF_001650875.1, s__Sulfitobacter sp001650875, 95.0, 79.35, 0.53; GCF_900103185.1, …	54.6	11	---	---
		23	SIP_5_Bin9	d__Bacteria	p__Proteobacteria	c__Gammaproteobacteria	o__Enterobacterales	f__Alteromonadaceae	g__Glaciecola	s__	---	---	---	---	---	---	---	---	---	d__Bacteria;p__Proteobacteria;c__Gammaproteobacteria;o__Enterobacterales;f__Alteromonadaceae;g__Glaciecola;s__	Placement	taxonomic classification fully defined by topology	---	70.91	11	0.969064455747	---
		24	SIP_5_Bin8	d__Bacteria	p__Proteobacteria	c__Alphaproteobacteria	o__Rhodobacterales	f__Rhodobacteraceae	g__Tateyamaria	s__Tateyamaria sp900143535	GCF_900143535.1	95.0	d__Bacteria;p__Proteobacteria;c__Alphaproteobacteria;o__Rhodobacterales;f__Rhodobacteraceae;g__Tateyamaria;s__Tateyamaria sp900143535	97.51	0.85	GCF_900143535.1	d__Bacteria;p__Proteobacteria;c__Alphaproteobacteria;o__Rhodobacterales;f__Rhodobacteraceae;g__Tateyamaria;s__Tateyamaria sp900143535	97.51	0.85	d__Bacteria;p__Proteobacteria;c__Alphaproteobacteria;o__Rhodobacterales;f__Rhodobacteraceae;g__Tateyamaria;s__	ANI/Placement	topological placement and ANI have congruent species assignments	GCF_001969365.1, s__Tateyamaria omphalii, 95.0, 78.37, 0.36; GCF_000814025.1, s__Tateyamaria sp000814025, 95.0, 78.22, 0.36	98.13	11	---	---
		25	SIP_5_Bin7	d__Bacteria	p__Proteobacteria	c__Alphaproteobacteria	o__Rhodobacterales	f__Rhodobacteraceae	g__Lentibacter	s__Lentibacter algarum	GCF_900107355.1	95.0	d__Bacteria;p__Proteobacteria;c__Alphaproteobacteria;o__Rhodobacterales;f__Rhodobacteraceae;g__Lentibacter;s__Lentibacter algarum	99.78	0.98	GCF_900107355.1	d__Bacteria;p__Proteobacteria;c__Alphaproteobacteria;o__Rhodobacterales;f__Rhodobacteraceae;g__Lentibacter;s__Lentibacter algarum	99.78	0.98	d__Bacteria;p__Proteobacteria;c__Alphaproteobacteria;o__Rhodobacterales;f__Rhodobacteraceae;g__;s__	ANI/Placement	topological placement and ANI have congruent species assignments	---	98.59	11	---	---
		26	SIP_5_Bin5	d__Bacteria	p__Proteobacteria	c__Gammaproteobacteria	o__Pseudomonadales	f__Saccharospirillaceae	g__Thalassolituus	s__Thalassolituus oleivorans	GCF_000355675.1	95.0	d__Bacteria;p__Proteobacteria;c__Gammaproteobacteria;o__Pseudomonadales;f__Saccharospirillaceae;g__Thalassolituus;s__Thalassolituus oleivorans	98.51	0.92	GCF_000355675.1	d__Bacteria;p__Proteobacteria;c__Gammaproteobacteria;o__Pseudomonadales;f__Saccharospirillaceae;g__Thalassolituus;s__Thalassolituus oleivorans	98.51	0.92	d__Bacteria;p__Proteobacteria;c__Gammaproteobacteria;o__Pseudomonadales;f__Saccharospirillaceae;g__;s__	ANI/Placement	topological placement and ANI have congruent species assignments	---	90.42	11	---	---
		27	SIP_5_Bin37	d__Bacteria	p__Proteobacteria	c__Alphaproteobacteria	o__Rhodobacterales	f__Rhodobacteraceae	g__Pseudophaeobacter	s__	---	---	---	---	---	GCF_000473205.1	d__Bacteria;p__Proteobacteria;c__Alphaproteobacteria;o__Rhodobacterales;f__Rhodobacteraceae;g__Pseudophaeobacter;s__Pseudophaeobacter arcticus	89.65	0.82	d__Bacteria;p__Proteobacteria;c__Alphaproteobacteria;o__Rhodobacterales;f__Rhodobacteraceae;g__Pseudophaeobacter;s__	Placement	taxonomic classification fully defined by topology	GCA_900313025.1, s__Pseudophaeobacter sp900313025, 95.0, 84.89, 0.74; GCF_001294455.1, s__Pseudophaeobacter sp001294455, 95.0, 83.85, 0.72; GCF_000152965.1, s__Pseudophaeobacter sp000152965, 95.0, 83.83, 0.71; GCF_002087335.1, s__Pseudophaeobacter leonis, 95.0, 82.25, 0.64; GCF_001457775.1, s__Pseudophaeobacter sp001457775, 95.0, 81.72, 0.63; GCF_000169455.1, s__Pseudophaeobacter sp000169455, 95.…	94.58	11	0.997338456529	---
		28	SIP_5_Bin33	d__Bacteria	p__Proteobacteria	c__Alphaproteobacteria	o__Caulobacterales	f__Hyphomonadaceae	g__Hyphomonas	s__Hyphomonas sp000682775	GCF_000682775.1	95.0	d__Bacteria;p__Proteobacteria;c__Alphaproteobacteria;o__Caulobacterales;f__Hyphomonadaceae;g__Hyphomonas;s__Hyphomonas sp000682775	95.7	0.86	GCF_000682775.1	d__Bacteria;p__Proteobacteria;c__Alphaproteobacteria;o__Caulobacterales;f__Hyphomonadaceae;g__Hyphomonas;s__Hyphomonas sp000682775	95.7	0.86	d__Bacteria;p__Proteobacteria;c__Alphaproteobacteria;o__Caulobacterales;f__Hyphomonadaceae;g__Hyphomonas;s__	ANI/Placement	topological placement and ANI have congruent species assignments	GCA_002414505.1, s__Hyphomonas sp002414505, 95.0, 85.8, 0.62; GCF_000682715.1, s__Hyphomonas atlantica, 95.0, 81.95, 0.65; GCF_000682675.1, s__Hyphomonas sp000682675, 95.0, 79.98, 0.52; GCA_002695785.1, s__Hyphomonas sp002695785, 95.0, 79.81, 0.49; GCF_000682755.1, s__Hyphomonas beringensis, 95.0, 79.71, 0.52; GCF_000682735.1, s__Hyphomonas sp000682735, 95.0, 78.79, 0.4; GCA_000961695.1, s__Hypho…	69.5	11	---	---
		29	SIP_5_Bin32	d__Bacteria	p__Proteobacteria	c__Alphaproteobacteria	o__Caulobacterales	f__Hyphomonadaceae	g__Hyphomonas	s__	---	---	---	---	---	GCA_002414505.1	d__Bacteria;p__Proteobacteria;c__Alphaproteobacteria;o__Caulobacterales;f__Hyphomonadaceae;g__Hyphomonas;s__Hyphomonas sp002414505	92.64	0.79	d__Bacteria;p__Proteobacteria;c__Alphaproteobacteria;o__Caulobacterales;f__Hyphomonadaceae;g__Hyphomonas;s__	Placement	taxonomic classification fully defined by topology	GCF_000682775.1, s__Hyphomonas sp000682775, 95.0, 84.98, 0.72; GCF_000682715.1, s__Hyphomonas atlantica, 95.0, 81.72, 0.6; GCA_002695785.1, s__Hyphomonas sp002695785, 95.0, 80.47, 0.51; GCF_000682755.1, s__Hyphomonas beringensis, 95.0, 80.26, 0.52; GCF_000682675.1, s__Hyphomonas sp000682675, 95.0, 80.14, 0.5; GCF_000685275.1, s__Hyphomonas johnsonii, 95.0, 79.49, 0.4; GCF_000682695.1, s__Hyphomon…	83.61	11	0.996359019046	---
		30	SIP_5_Bin3	d__Bacteria	p__Proteobacteria	c__Alphaproteobacteria	o__Rhodobacterales	f__Rhodobacteraceae	g__Pseudophaeobacter	s__	---	---	---	---	---	GCF_000473205.1	d__Bacteria;p__Proteobacteria;c__Alphaproteobacteria;o__Rhodobacterales;f__Rhodobacteraceae;g__Pseudophaeobacter;s__Pseudophaeobacter arcticus	89.58	0.82	d__Bacteria;p__Proteobacteria;c__Alphaproteobacteria;o__Rhodobacterales;f__Rhodobacteraceae;g__Pseudophaeobacter;s__	Placement	taxonomic classification fully defined by topology	GCA_900313025.1, s__Pseudophaeobacter sp900313025, 95.0, 84.84, 0.76; GCF_000152965.1, s__Pseudophaeobacter sp000152965, 95.0, 83.75, 0.72; GCF_001294455.1, s__Pseudophaeobacter sp001294455, 95.0, 83.73, 0.73; GCF_002087335.1, s__Pseudophaeobacter leonis, 95.0, 82.16, 0.65; GCF_001457775.1, s__Pseudophaeobacter sp001457775, 95.0, 81.58, 0.63; GCF_000169455.1, s__Pseudophaeobacter sp000169455, 95.…	87.96	11	0.997413615838	---
		31	SIP_5_Bin26	d__Bacteria	p__Bacteroidota	c__Bacteroidia	o__Flavobacteriales	f__Flavobacteriaceae	g__Flavobacterium	s__	---	---	---	---	---	GCA_002862805.1	d__Bacteria;p__Bacteroidota;c__Bacteroidia;o__Flavobacteriales;f__Flavobacteriaceae;g__Flavobacterium;s__Flavobacterium sp002862805	86.17	0.84	d__Bacteria;p__Bacteroidota;c__Bacteroidia;o__Flavobacteriales;f__Flavobacteriaceae;g__Flavobacterium;s__	Placement	taxonomic classification fully defined by topology	GCF_000422685.1, s__Flavobacterium gelidilacus, 95.0, 79.27, 0.56; GCF_000967805.1, s__Flavobacterium sp000967805, 95.0, 79.25, 0.58; GCF_900142055.1, s__Flavobacterium haoranii, 95.0, 79.19, 0.52; GCA_003293845.1, s__Flavobacterium sp003293845, 95.0, 79.11, 0.46; GCF_000169355.1, s__Flavobacterium sp000169355, 95.0, 79.1, 0.52; GCA_003497625.1, s__Flavobacterium sp003497625, 95.0, 78.95, 0.5; GC…	67.1	11	0.981218752418	---
		32	SIP_5_Bin25_sub	d__Bacteria	p__Proteobacteria	c__Gammaproteobacteria	o__Pseudomonadales	f__Alcanivoracaceae	g__Alcanivorax	s__	---	---	---	---	---	GCF_000009365.1	d__Bacteria;p__Proteobacteria;c__Gammaproteobacteria;o__Pseudomonadales;f__Alcanivoracaceae;g__Alcanivorax;s__Alcanivorax borkumensis	93.01	0.88	d__Bacteria;p__Proteobacteria;c__Gammaproteobacteria;o__Pseudomonadales;f__Alcanivoracaceae;g__Alcanivorax;s__	Placement	taxonomic classification fully defined by topology	GCF_000155615.1, s__Alcanivorax sp000155615, 95.0, 83.7, 0.74; GCA_002733835.1, s__Alcanivorax sp002733835, 95.0, 83.44, 0.7; GCA_002726155.1, s__Alcanivorax sp002726155, 95.0, 83.23, 0.7; GCF_900107995.1, s__Alcanivorax sp900107995, 95.0, 80.76, 0.5; GCF_000300995.1, s__Alcanivorax hongdengensis, 95.0, 80.2, 0.43; GCF_000756655.1, s__Alcanivorax jadensis, 95.0, 80.15, 0.52; GCF_000756665.1, s__A…	87.76	11	0.99527501005	---
		33	SIP_5_Bin25	d__Bacteria	p__Proteobacteria	c__Alphaproteobacteria	o__Rhodobacterales	f__Rhodobacteraceae	g__Tateyamaria	s__Tateyamaria sp900143535	GCF_900143535.1	95.0	d__Bacteria;p__Proteobacteria;c__Alphaproteobacteria;o__Rhodobacterales;f__Rhodobacteraceae;g__Tateyamaria;s__Tateyamaria sp900143535	97.64	0.92	GCF_900143535.1	d__Bacteria;p__Proteobacteria;c__Alphaproteobacteria;o__Rhodobacterales;f__Rhodobacteraceae;g__Tateyamaria;s__Tateyamaria sp900143535	97.64	0.92	d__Bacteria;p__Proteobacteria;c__Alphaproteobacteria;o__Rhodobacterales;f__Rhodobacteraceae;g__Tateyamaria;s__	ANI/Placement	topological placement and ANI have congruent species assignments	GCF_001969365.1, s__Tateyamaria omphalii, 95.0, 78.45, 0.41; GCF_000814025.1, s__Tateyamaria sp000814025, 95.0, 78.26, 0.41	97.92	11	---	---
		34	SIP_5_Bin2	d__Bacteria	p__Proteobacteria	c__Gammaproteobacteria	o__Pseudomonadales	f__UBA7239	g__	s__	---	---	---	---	---	---	---	---	---	d__Bacteria;p__Proteobacteria;c__Gammaproteobacteria;o__Pseudomonadales;f__;g__;s__	Placement	taxonomic novelty determined using RED	---	99.03	11	0.776289044877	---
		35	SIP_5_Bin19	d__Bacteria	p__Proteobacteria	c__Gammaproteobacteria	o__Pseudomonadales	f__Saccharospirillaceae	g__Thalassolituus	s__Thalassolituus oleivorans	GCF_000355675.1	95.0	d__Bacteria;p__Proteobacteria;c__Gammaproteobacteria;o__Pseudomonadales;f__Saccharospirillaceae;g__Thalassolituus;s__Thalassolituus oleivorans	98.43	0.93	GCF_000355675.1	d__Bacteria;p__Proteobacteria;c__Gammaproteobacteria;o__Pseudomonadales;f__Saccharospirillaceae;g__Thalassolituus;s__Thalassolituus oleivorans	98.43	0.93	d__Bacteria;p__Proteobacteria;c__Gammaproteobacteria;o__Pseudomonadales;f__Saccharospirillaceae;g__;s__	ANI/Placement	topological placement and ANI have congruent species assignments	---	81.59	11	---	---
		36	SIP_5_Bin16	d__Bacteria	p__Bacteroidota	c__Bacteroidia	o__Flavobacteriales	f__Flavobacteriaceae	g__Flavobacterium	s__	---	---	---	---	---	GCA_002862805.1	d__Bacteria;p__Bacteroidota;c__Bacteroidia;o__Flavobacteriales;f__Flavobacteriaceae;g__Flavobacterium;s__Flavobacterium sp002862805	86.34	0.78	d__Bacteria;p__Bacteroidota;c__Bacteroidia;o__Flavobacteriales;f__Flavobacteriaceae;g__Flavobacterium;s__	Placement	taxonomic classification fully defined by topology	GCF_900142055.1, s__Flavobacterium haoranii, 95.0, 79.42, 0.51; GCF_000967805.1, s__Flavobacterium sp000967805, 95.0, 79.28, 0.57; GCF_000422685.1, s__Flavobacterium gelidilacus, 95.0, 79.17, 0.54; GCF_000169355.1, s__Flavobacterium sp000169355, 95.0, 79.05, 0.51; GCF_003259835.1, s__Flavobacterium aquaticum, 95.0, 79.05, 0.48; GCA_003293845.1, s__Flavobacterium sp003293845, 95.0, 78.99, 0.47; GC…	90.63	11	0.983243534442	---
		37	SIP_5_Bin15	d__Bacteria	p__Proteobacteria	c__Alphaproteobacteria	o__Caulobacterales	f__Hyphomonadaceae	g__Henriciella	s__	---	---	---	---	---	---	---	---	---	d__Bacteria;p__Proteobacteria;c__Alphaproteobacteria;o__Caulobacterales;f__Hyphomonadaceae;g__Henriciella;s__	Placement	taxonomic classification fully defined by topology	---	96.03	11	0.959279134206	---
		38	SIP_5_Bin13	d__Bacteria	p__Proteobacteria	c__Alphaproteobacteria	o__Rhodobacterales	f__Rhodobacteraceae	g__Lentibacter	s__Lentibacter algarum	GCF_900107355.1	95.0	d__Bacteria;p__Proteobacteria;c__Alphaproteobacteria;o__Rhodobacterales;f__Rhodobacteraceae;g__Lentibacter;s__Lentibacter algarum	99.84	0.99	GCF_900107355.1	d__Bacteria;p__Proteobacteria;c__Alphaproteobacteria;o__Rhodobacterales;f__Rhodobacteraceae;g__Lentibacter;s__Lentibacter algarum	99.84	0.99	d__Bacteria;p__Proteobacteria;c__Alphaproteobacteria;o__Rhodobacterales;f__Rhodobacteraceae;g__;s__	ANI/Placement	topological placement and ANI have congruent species assignments	---	98.59	11	---	---
		39	SIP_5_Bin11	d__Bacteria	p__Proteobacteria	c__Gammaproteobacteria	o__Pseudomonadales	f__Alcanivoracaceae	g__Alcanivorax	s__Alcanivorax jadensis	GCF_000756655.1	95.0	d__Bacteria;p__Proteobacteria;c__Gammaproteobacteria;o__Pseudomonadales;f__Alcanivoracaceae;g__Alcanivorax;s__Alcanivorax jadensis	97.89	0.93	GCF_000756655.1	d__Bacteria;p__Proteobacteria;c__Gammaproteobacteria;o__Pseudomonadales;f__Alcanivoracaceae;g__Alcanivorax;s__Alcanivorax jadensis	97.89	0.93	d__Bacteria;p__Proteobacteria;c__Gammaproteobacteria;o__Pseudomonadales;f__Alcanivoracaceae;g__Alcanivorax;s__	ANI/Placement	topological placement and ANI have congruent species assignments	GCF_900107995.1, s__Alcanivorax sp900107995, 95.0, 87.83, 0.88; GCF_000155615.1, s__Alcanivorax sp000155615, 95.0, 82.05, 0.71; GCA_002733835.1, s__Alcanivorax sp002733835, 95.0, 81.84, 0.66; GCA_002726155.1, s__Alcanivorax sp002726155, 95.0, 81.55, 0.64; GCF_000300995.1, s__Alcanivorax hongdengensis, 95.0, 81.43, 0.6; GCA_002706085.1, s__Alcanivorax sp002706085, 95.0, 80.88, 0.56; GCF_000756665.…	98.89	11	---	---
		40	SIP_5_Bin1	d__Bacteria	p__Proteobacteria	c__Alphaproteobacteria	o__Rhodobacterales	f__Rhodobacteraceae	g__Planktomarina	s__Planktomarina temperata	GCF_000738435.1	95.0	d__Bacteria;p__Proteobacteria;c__Alphaproteobacteria;o__Rhodobacterales;f__Rhodobacteraceae;g__Planktomarina;s__Planktomarina temperata	99.09	0.98	GCF_000738435.1	d__Bacteria;p__Proteobacteria;c__Alphaproteobacteria;o__Rhodobacterales;f__Rhodobacteraceae;g__Planktomarina;s__Planktomarina temperata	99.09	0.98	d__Bacteria;p__Proteobacteria;c__Alphaproteobacteria;o__Rhodobacterales;f__Rhodobacteraceae;g__Planktomarina;s__	ANI/Placement	topological placement and ANI have congruent species assignments	GCA_002683685.1, s__Planktomarina sp002683685, 95.0, 87.09, 0.72	79.13	11	---	---
		41	SIP_5_Bin0	d__Bacteria	p__Proteobacteria	c__Alphaproteobacteria	o__Rhodobacterales	f__Rhodobacteraceae	g__Celeribacter_B	s__	---	---	---	---	---	GCF_002504165.1	d__Bacteria;p__Proteobacteria;c__Alphaproteobacteria;o__Rhodobacterales;f__Rhodobacteraceae;g__Celeribacter_B;s__Celeribacter_B manganoxidans	87.47	0.85	d__Bacteria;p__Proteobacteria;c__Alphaproteobacteria;o__Rhodobacterales;f__Rhodobacteraceae;g__;s__	Placement	taxonomic novelty determined using RED	---	98.95	11	0.992210489761	---
		42	SIP_5_2.B14	d__Bacteria	p__Proteobacteria	c__Gammaproteobacteria	o__Pseudomonadales	f__Oleiphilaceae	g__Marinobacter	s__Marinobacter salarius	GCF_000831005.1	95.0	d__Bacteria;p__Proteobacteria;c__Gammaproteobacteria;o__Pseudomonadales;f__Oleiphilaceae;g__Marinobacter;s__Marinobacter salarius	98.73	0.86	GCF_000831005.1	d__Bacteria;p__Proteobacteria;c__Gammaproteobacteria;o__Pseudomonadales;f__Oleiphilaceae;g__Marinobacter;s__Marinobacter salarius	98.73	0.86	d__Bacteria;p__Proteobacteria;c__Gammaproteobacteria;o__Pseudomonadales;f__Oleiphilaceae;g__Marinobacter;s__	ANI/Placement	topological placement and ANI have congruent species assignments	GCA_002732725.1, s__Marinobacter sp002732725, 95.0, 92.7, 0.84; GCF_000170835.1, s__Marinobacter algicola, 95.0, 92.6, 0.83; GCA_002726615.1, s__Marinobacter sp002726615, 95.0, 92.04, 0.8; GCF_000686085.1, s__Marinobacter sp000686085, 95.0, 82.26, 0.58; GCF_000235625.1, s__Marinobacter manganoxydans, 96.59, 80.4, 0.4; GCA_003030785.1, s__Marinobacter sp003030785, 95.0, 80.29, 0.41; GCF_001717765.…	99.23	11	---	---
