# Supplementary material for: Novel hydrocarbon-degradation pathways in uncultured bacteria in industrial-impacted ocean waters
Source: Research Square preprint supplement (doi:10.21203/rs.3.rs-2060586/v1), 2022-09-16
Supplement: Supplementary file 5 [file adbb282ac4fff6f430e2add2.xlsx]

## Sheet: Sp6
		Supplementary Table 6. KEGG-based functional annotation of the forty-two MAGs from the n-hexadecane SIP enrichments. The first four columns represent the KEGG modules and pathways. The following three represent the main biogeochemical cycle categories described in the DiTings pipeline (https://github.com/xuechunxu/DiTing/blob/master/table/KO_affilated_to_biogeochemical_cycle.tab). The following f…
		Module	Module_description	Pathway	Pathway description	Cycle	Pathway cycle	Detail cycle	Genes	Gene description	Enzyme	KO	rbims pathway	rbims sub-pathway	SIP_5_Bin0-g_Celeribacter	SIP1_5_Bin10-s_Marinobacter salarius	SIP_5_Bin11-s_Alcanivorax jadensis	SIP_5_Bin13-s_Lentibacter algarum	SIP_5_Bin15-g_Henriciella	SIP1_5_Bin18-g_Oleibacter	SIP_5_Bin19-s_Thalassolituus oleivorans	SIP_5_Bin1-s_Planktomarina temperata	SIP_5_Bin25_sub-g_Alcanivorax	SIP_5_Bin26-g_Flavobacterium	SIP_5_Bin2-o_Pseudomonadales	SIP_5_Bin32-g_Hyphomonas	SIP_5_Bin33-g_Hyphomonas	SIP_5_Bin37-g_Pseudophaeobacter	SIP_5_Bin8-g_Tateyamaria	SIP_5_Bin9-g_Glaciecola	SIP2_5_Bin10-g_Celeribacter	SIP_5_2.B14-s_Marinobacter salarius	SIP_5_Bin16-g_Flavobacterium	SIP2_5_Bin18-g_Alcanivorax	SIP_5_Bin25-g_Tateyamaria	SIP_5_Bin3-g_Pseudophaeobacter	SIP_5_Bin5-s_Thalassolituus oleivorans	SIP_5_Bin7-s_Lentibacter algarum	SIP_700_Bin0-g_Sulfitobacter	SIP_700_Bin12-g_Dokdonia	SIP_700_Bin15-g_Oleibacter	SIP_700_Bin17-g_Olleya	SIP_700_Bin18-g_Glaciecola	SIP_700_Bin1-g_Paracoccus	SIP_700_Bin20-g_Alcanivorax	SIP_700_Bin2-g_Alteromonas	SIP_700_Bin3-s_Marinobacter salarius	SIP_700_Bin8-g_Pseudophaeobacter	SIP_700_Bin13-g_Pseudophaeobacter
	1	M00936	Melatonin biosynthesis, plants, tryptophan => serotonin => melatonin	map00350	Tyrosine metabolism	---	---	---	DDC, TDC	aromatic-L-amino-acid/L-tryptophan decarboxylase [EC:4.1.1.28 4.1.1.105]	ec:4.1.1.28	K01593	---	---	0	0	0	1	1	0	0	1	0	0	0	1	1	1	1	0	0	0	0	0	1	1	0	1	0	1	0	0	0	0	0	0	0	1	1
	2	M00936	Melatonin biosynthesis, plants, tryptophan => serotonin => melatonin	map00350	Tyrosine metabolism	---	---	---	DDC, TDC	aromatic-L-amino-acid/L-tryptophan decarboxylase [EC:4.1.1.28 4.1.1.105]	ec:4.1.1.105	K01593	---	---	0	0	0	1	1	0	0	1	0	0	0	1	1	1	1	0	0	0	0	0	1	1	0	1	0	1	0	0	0	0	0	0	0	1	1
	3	M00936	Melatonin biosynthesis, plants, tryptophan => serotonin => melatonin	map00360	Phenylalanine metabolism	---	---	---	DDC, TDC	aromatic-L-amino-acid/L-tryptophan decarboxylase [EC:4.1.1.28 4.1.1.105]	ec:4.1.1.28	K01593	---	---	0	0	0	1	1	0	0	1	0	0	0	1	1	1	1	0	0	0	0	0	1	1	0	1	0	1	0	0	0	0	0	0	0	1	1
	4	M00936	Melatonin biosynthesis, plants, tryptophan => serotonin => melatonin	map00360	Phenylalanine metabolism	---	---	---	DDC, TDC	aromatic-L-amino-acid/L-tryptophan decarboxylase [EC:4.1.1.28 4.1.1.105]	ec:4.1.1.105	K01593	---	---	0	0	0	1	1	0	0	1	0	0	0	1	1	1	1	0	0	0	0	0	1	1	0	1	0	1	0	0	0	0	0	0	0	1	1
	5	M00936	Melatonin biosynthesis, plants, tryptophan => serotonin => melatonin	map00380	Tryptophan metabolism	---	---	---	DDC, TDC	aromatic-L-amino-acid/L-tryptophan decarboxylase [EC:4.1.1.28 4.1.1.105]	ec:4.1.1.28	K01593	---	---	0	0	0	1	1	0	0	1	0	0	0	1	1	1	1	0	0	0	0	0	1	1	0	1	0	1	0	0	0	0	0	0	0	1	1
	6	M00936	Melatonin biosynthesis, plants, tryptophan => serotonin => melatonin	map00380	Tryptophan metabolism	---	---	---	DDC, TDC	aromatic-L-amino-acid/L-tryptophan decarboxylase [EC:4.1.1.28 4.1.1.105]	ec:4.1.1.105	K01593	---	---	0	0	0	1	1	0	0	1	0	0	0	1	1	1	1	0	0	0	0	0	1	1	0	1	0	1	0	0	0	0	0	0	0	1	1
	7	M00936	Melatonin biosynthesis, plants, tryptophan => serotonin => melatonin	map00901	Indole alkaloid biosynthesis	---	---	---	DDC, TDC	aromatic-L-amino-acid/L-tryptophan decarboxylase [EC:4.1.1.28 4.1.1.105]	ec:4.1.1.28	K01593	---	---	0	0	0	1	1	0	0	1	0	0	0	1	1	1	1	0	0	0	0	0	1	1	0	1	0	1	0	0	0	0	0	0	0	1	1
	8	M00936	Melatonin biosynthesis, plants, tryptophan => serotonin => melatonin	map00901	Indole alkaloid biosynthesis	---	---	---	DDC, TDC	aromatic-L-amino-acid/L-tryptophan decarboxylase [EC:4.1.1.28 4.1.1.105]	ec:4.1.1.105	K01593	---	---	0	0	0	1	1	0	0	1	0	0	0	1	1	1	1	0	0	0	0	0	1	1	0	1	0	1	0	0	0	0	0	0	0	1	1
	9	M00936	Melatonin biosynthesis, plants, tryptophan => serotonin => melatonin	map00950	Isoquinoline alkaloid biosynthesis	---	---	---	DDC, TDC	aromatic-L-amino-acid/L-tryptophan decarboxylase [EC:4.1.1.28 4.1.1.105]	ec:4.1.1.28	K01593	---	---	0	0	0	1	1	0	0	1	0	0	0	1	1	1	1	0	0	0	0	0	1	1	0	1	0	1	0	0	0	0	0	0	0	1	1
	10	M00936	Melatonin biosynthesis, plants, tryptophan => serotonin => melatonin	map00950	Isoquinoline alkaloid biosynthesis	---	---	---	DDC, TDC	aromatic-L-amino-acid/L-tryptophan decarboxylase [EC:4.1.1.28 4.1.1.105]	ec:4.1.1.105	K01593	---	---	0	0	0	1	1	0	0	1	0	0	0	1	1	1	1	0	0	0	0	0	1	1	0	1	0	1	0	0	0	0	0	0	0	1	1
	11	M00936	Melatonin biosynthesis, plants, tryptophan => serotonin => melatonin	map00965	Betalain biosynthesis	---	---	---	DDC, TDC	aromatic-L-amino-acid/L-tryptophan decarboxylase [EC:4.1.1.28 4.1.1.105]	ec:4.1.1.28	K01593	---	---	0	0	0	1	1	0	0	1	0	0	0	1	1	1	1	0	0	0	0	0	1	1	0	1	0	1	0	0	0	0	0	0	0	1	1
	12	M00936	Melatonin biosynthesis, plants, tryptophan => serotonin => melatonin	map00965	Betalain biosynthesis	---	---	---	DDC, TDC	aromatic-L-amino-acid/L-tryptophan decarboxylase [EC:4.1.1.28 4.1.1.105]	ec:4.1.1.105	K01593	---	---	0	0	0	1	1	0	0	1	0	0	0	1	1	1	1	0	0	0	0	0	1	1	0	1	0	1	0	0	0	0	0	0	0	1	1
	13	M00936	Melatonin biosynthesis, plants, tryptophan => serotonin => melatonin	map01100	Metabolic pathways	---	---	---	DDC, TDC	aromatic-L-amino-acid/L-tryptophan decarboxylase [EC:4.1.1.28 4.1.1.105]	ec:4.1.1.28	K01593	---	---	0	0	0	1	1	0	0	1	0	0	0	1	1	1	1	0	0	0	0	0	1	1	0	1	0	1	0	0	0	0	0	0	0	1	1
	14	M00936	Melatonin biosynthesis, plants, tryptophan => serotonin => melatonin	map01100	Metabolic pathways	---	---	---	DDC, TDC	aromatic-L-amino-acid/L-tryptophan decarboxylase [EC:4.1.1.28 4.1.1.105]	ec:4.1.1.105	K01593	---	---	0	0	0	1	1	0	0	1	0	0	0	1	1	1	1	0	0	0	0	0	1	1	0	1	0	1	0	0	0	0	0	0	0	1	1
	15	M00936	Melatonin biosynthesis, plants, tryptophan => serotonin => melatonin	map01110	Biosynthesis of secondary metabolites	---	---	---	DDC, TDC	aromatic-L-amino-acid/L-tryptophan decarboxylase [EC:4.1.1.28 4.1.1.105]	ec:4.1.1.28	K01593	---	---	0	0	0	1	1	0	0	1	0	0	0	1	1	1	1	0	0	0	0	0	1	1	0	1	0	1	0	0	0	0	0	0	0	1	1
	16	M00936	Melatonin biosynthesis, plants, tryptophan => serotonin => melatonin	map01110	Biosynthesis of secondary metabolites	---	---	---	DDC, TDC	aromatic-L-amino-acid/L-tryptophan decarboxylase [EC:4.1.1.28 4.1.1.105]	ec:4.1.1.105	K01593	---	---	0	0	0	1	1	0	0	1	0	0	0	1	1	1	1	0	0	0	0	0	1	1	0	1	0	1	0	0	0	0	0	0	0	1	1
	17	M00936	Melatonin biosynthesis, plants, tryptophan => serotonin => melatonin	map04361	Axon regeneration	---	---	---	DDC, TDC	aromatic-L-amino-acid/L-tryptophan decarboxylase [EC:4.1.1.28 4.1.1.105]	ec:4.1.1.28	K01593	---	---	0	0	0	1	1	0	0	1	0	0	0	1	1	1	1	0	0	0	0	0	1	1	0	1	0	1	0	0	0	0	0	0	0	1	1
	18	M00936	Melatonin biosynthesis, plants, tryptophan => serotonin => melatonin	map04361	Axon regeneration	---	---	---	DDC, TDC	aromatic-L-amino-acid/L-tryptophan decarboxylase [EC:4.1.1.28 4.1.1.105]	ec:4.1.1.105	K01593	---	---	0	0	0	1	1	0	0	1	0	0	0	1	1	1	1	0	0	0	0	0	1	1	0	1	0	1	0	0	0	0	0	0	0	1	1
	19	M00936	Melatonin biosynthesis, plants, tryptophan => serotonin => melatonin	map04726	Serotonergic synapse	---	---	---	DDC, TDC	aromatic-L-amino-acid/L-tryptophan decarboxylase [EC:4.1.1.28 4.1.1.105]	ec:4.1.1.28	K01593	---	---	0	0	0	1	1	0	0	1	0	0	0	1	1	1	1	0	0	0	0	0	1	1	0	1	0	1	0	0	0	0	0	0	0	1	1
	20	M00936	Melatonin biosynthesis, plants, tryptophan => serotonin => melatonin	map04726	Serotonergic synapse	---	---	---	DDC, TDC	aromatic-L-amino-acid/L-tryptophan decarboxylase [EC:4.1.1.28 4.1.1.105]	ec:4.1.1.105	K01593	---	---	0	0	0	1	1	0	0	1	0	0	0	1	1	1	1	0	0	0	0	0	1	1	0	1	0	1	0	0	0	0	0	0	0	1	1
	21	M00936	Melatonin biosynthesis, plants, tryptophan => serotonin => melatonin	map04728	Dopaminergic synapse	---	---	---	DDC, TDC	aromatic-L-amino-acid/L-tryptophan decarboxylase [EC:4.1.1.28 4.1.1.105]	ec:4.1.1.28	K01593	---	---	0	0	0	1	1	0	0	1	0	0	0	1	1	1	1	0	0	0	0	0	1	1	0	1	0	1	0	0	0	0	0	0	0	1	1
	22	M00936	Melatonin biosynthesis, plants, tryptophan => serotonin => melatonin	map04728	Dopaminergic synapse	---	---	---	DDC, TDC	aromatic-L-amino-acid/L-tryptophan decarboxylase [EC:4.1.1.28 4.1.1.105]	ec:4.1.1.105	K01593	---	---	0	0	0	1	1	0	0	1	0	0	0	1	1	1	1	0	0	0	0	0	1	1	0	1	0	1	0	0	0	0	0	0	0	1	1
	23	M00936	Melatonin biosynthesis, plants, tryptophan => serotonin => melatonin	map05030	Cocaine addiction	---	---	---	DDC, TDC	aromatic-L-amino-acid/L-tryptophan decarboxylase [EC:4.1.1.28 4.1.1.105]	ec:4.1.1.28	K01593	---	---	0	0	0	1	1	0	0	1	0	0	0	1	1	1	1	0	0	0	0	0	1	1	0	1	0	1	0	0	0	0	0	0	0	1	1
	24	M00936	Melatonin biosynthesis, plants, tryptophan => serotonin => melatonin	map05030	Cocaine addiction	---	---	---	DDC, TDC	aromatic-L-amino-acid/L-tryptophan decarboxylase [EC:4.1.1.28 4.1.1.105]	ec:4.1.1.105	K01593	---	---	0	0	0	1	1	0	0	1	0	0	0	1	1	1	1	0	0	0	0	0	1	1	0	1	0	1	0	0	0	0	0	0	0	1	1
	25	M00936	Melatonin biosynthesis, plants, tryptophan => serotonin => melatonin	map05031	Amphetamine addiction	---	---	---	DDC, TDC	aromatic-L-amino-acid/L-tryptophan decarboxylase [EC:4.1.1.28 4.1.1.105]	ec:4.1.1.28	K01593	---	---	0	0	0	1	1	0	0	1	0	0	0	1	1	1	1	0	0	0	0	0	1	1	0	1	0	1	0	0	0	0	0	0	0	1	1
	26	M00936	Melatonin biosynthesis, plants, tryptophan => serotonin => melatonin	map05031	Amphetamine addiction	---	---	---	DDC, TDC	aromatic-L-amino-acid/L-tryptophan decarboxylase [EC:4.1.1.28 4.1.1.105]	ec:4.1.1.105	K01593	---	---	0	0	0	1	1	0	0	1	0	0	0	1	1	1	1	0	0	0	0	0	1	1	0	1	0	1	0	0	0	0	0	0	0	1	1
	27	M00936	Melatonin biosynthesis, plants, tryptophan => serotonin => melatonin	map05034	Alcoholism	---	---	---	DDC, TDC	aromatic-L-amino-acid/L-tryptophan decarboxylase [EC:4.1.1.28 4.1.1.105]	ec:4.1.1.28	K01593	---	---	0	0	0	1	1	0	0	1	0	0	0	1	1	1	1	0	0	0	0	0	1	1	0	1	0	1	0	0	0	0	0	0	0	1	1
	28	M00936	Melatonin biosynthesis, plants, tryptophan => serotonin => melatonin	map05034	Alcoholism	---	---	---	DDC, TDC	aromatic-L-amino-acid/L-tryptophan decarboxylase [EC:4.1.1.28 4.1.1.105]	ec:4.1.1.105	K01593	---	---	0	0	0	1	1	0	0	1	0	0	0	1	1	1	1	0	0	0	0	0	1	1	0	1	0	1	0	0	0	0	0	0	0	1	1
	29	M00935	Methanofuran biosynthesis	map00350	Tyrosine metabolism	---	---	---	mfnA, adc	tyrosine decarboxylase / aspartate 1-decarboxylase [EC:4.1.1.25 4.1.1.11]	ec:4.1.1.25	K18933	---	---	0	0	0	0	0	0	0	0	0	1	0	0	0	0	0	0	0	0	1	0	0	0	0	0	0	0	0	0	0	0	0	0	0	0	0
	30	M00935	Methanofuran biosynthesis	map00350	Tyrosine metabolism	---	---	---	mfnA, adc	tyrosine decarboxylase / aspartate 1-decarboxylase [EC:4.1.1.25 4.1.1.11]	ec:4.1.1.11	K18933	---	---	0	0	0	0	0	0	0	0	0	1	0	0	0	0	0	0	0	0	1	0	0	0	0	0	0	0	0	0	0	0	0	0	0	0	0
	31	M00935	Methanofuran biosynthesis	map00410	beta-Alanine metabolism	---	---	---	mfnA, adc	tyrosine decarboxylase / aspartate 1-decarboxylase [EC:4.1.1.25 4.1.1.11]	ec:4.1.1.25	K18933	---	---	0	0	0	0	0	0	0	0	0	1	0	0	0	0	0	0	0	0	1	0	0	0	0	0	0	0	0	0	0	0	0	0	0	0	0
	32	M00935	Methanofuran biosynthesis	map00410	beta-Alanine metabolism	---	---	---	mfnA, adc	tyrosine decarboxylase / aspartate 1-decarboxylase [EC:4.1.1.25 4.1.1.11]	ec:4.1.1.11	K18933	---	---	0	0	0	0	0	0	0	0	0	1	0	0	0	0	0	0	0	0	1	0	0	0	0	0	0	0	0	0	0	0	0	0	0	0	0
	33	M00935	Methanofuran biosynthesis	map00680	Methane metabolism	---	---	---	mfnA, adc	tyrosine decarboxylase / aspartate 1-decarboxylase [EC:4.1.1.25 4.1.1.11]	ec:4.1.1.25	K18933	---	---	0	0	0	0	0	0	0	0	0	1	0	0	0	0	0	0	0	0	1	0	0	0	0	0	0	0	0	0	0	0	0	0	0	0	0
	34	M00935	Methanofuran biosynthesis	map00680	Methane metabolism	---	---	---	mfnA, adc	tyrosine decarboxylase / aspartate 1-decarboxylase [EC:4.1.1.25 4.1.1.11]	ec:4.1.1.11	K18933	---	---	0	0	0	0	0	0	0	0	0	1	0	0	0	0	0	0	0	0	1	0	0	0	0	0	0	0	0	0	0	0	0	0	0	0	0
	35	M00935	Methanofuran biosynthesis	map00770	Pantothenate and CoA biosynthesis	---	---	---	mfnA, adc	tyrosine decarboxylase / aspartate 1-decarboxylase [EC:4.1.1.25 4.1.1.11]	ec:4.1.1.25	K18933	---	---	0	0	0	0	0	0	0	0	0	1	0	0	0	0	0	0	0	0	1	0	0	0	0	0	0	0	0	0	0	0	0	0	0	0	0
	36	M00935	Methanofuran biosynthesis	map00770	Pantothenate and CoA biosynthesis	---	---	---	mfnA, adc	tyrosine decarboxylase / aspartate 1-decarboxylase [EC:4.1.1.25 4.1.1.11]	ec:4.1.1.11	K18933	---	---	0	0	0	0	0	0	0	0	0	1	0	0	0	0	0	0	0	0	1	0	0	0	0	0	0	0	0	0	0	0	0	0	0	0	0
	37	M00935	Methanofuran biosynthesis	map01100	Metabolic pathways	---	---	---	mfnA, adc	tyrosine decarboxylase / aspartate 1-decarboxylase [EC:4.1.1.25 4.1.1.11]	ec:4.1.1.25	K18933	---	---	0	0	0	0	0	0	0	0	0	1	0	0	0	0	0	0	0	0	1	0	0	0	0	0	0	0	0	0	0	0	0	0	0	0	0
	38	M00935	Methanofuran biosynthesis	map01100	Metabolic pathways	---	---	---	mfnA, adc	tyrosine decarboxylase / aspartate 1-decarboxylase [EC:4.1.1.25 4.1.1.11]	ec:4.1.1.11	K18933	---	---	0	0	0	0	0	0	0	0	0	1	0	0	0	0	0	0	0	0	1	0	0	0	0	0	0	0	0	0	0	0	0	0	0	0	0
	39	M00935	Methanofuran biosynthesis	map01110	Biosynthesis of secondary metabolites	---	---	---	mfnA, adc	tyrosine decarboxylase / aspartate 1-decarboxylase [EC:4.1.1.25 4.1.1.11]	ec:4.1.1.25	K18933	---	---	0	0	0	0	0	0	0	0	0	1	0	0	0	0	0	0	0	0	1	0	0	0	0	0	0	0	0	0	0	0	0	0	0	0	0
	40	M00935	Methanofuran biosynthesis	map01110	Biosynthesis of secondary metabolites	---	---	---	mfnA, adc	tyrosine decarboxylase / aspartate 1-decarboxylase [EC:4.1.1.25 4.1.1.11]	ec:4.1.1.11	K18933	---	---	0	0	0	0	0	0	0	0	0	1	0	0	0	0	0	0	0	0	1	0	0	0	0	0	0	0	0	0	0	0	0	0	0	0	0
	41	M00935	Methanofuran biosynthesis	map01240	Biosynthesis of cofactors	---	---	---	mfnA, adc	tyrosine decarboxylase / aspartate 1-decarboxylase [EC:4.1.1.25 4.1.1.11]	ec:4.1.1.25	K18933	---	---	0	0	0	0	0	0	0	0	0	1	0	0	0	0	0	0	0	0	1	0	0	0	0	0	0	0	0	0	0	0	0	0	0	0	0
	42	M00935	Methanofuran biosynthesis	map01240	Biosynthesis of cofactors	---	---	---	mfnA, adc	tyrosine decarboxylase / aspartate 1-decarboxylase [EC:4.1.1.25 4.1.1.11]	ec:4.1.1.11	K18933	---	---	0	0	0	0	0	0	0	0	0	1	0	0	0	0	0	0	0	0	1	0	0	0	0	0	0	0	0	0	0	0	0	0	0	0	0
	43	M00932	Phylloquinone biosynthesis, chorismate (+ phytyl-PP) => phylloquinol	map00130	Ubiquinone and other terpenoid-quinone biosynthesis	---	---	---	menI, DHNAT	1,4-dihydroxy-2-naphthoyl-CoA hydrolase [EC:3.1.2.28]	ec:3.1.2.28	K19222	---	---	0	1	0	0	1	1	0	0	0	1	0	1	1	0	0	0	0	1	1	0	0	0	0	0	0	1	1	1	0	0	0	0	1	0	0
	44	M00932	Phylloquinone biosynthesis, chorismate (+ phytyl-PP) => phylloquinol	map01100	Metabolic pathways	---	---	---	menI, DHNAT	1,4-dihydroxy-2-naphthoyl-CoA hydrolase [EC:3.1.2.28]	ec:3.1.2.28	K19222	---	---	0	1	0	0	1	1	0	0	0	1	0	1	1	0	0	0	0	1	1	0	0	0	0	0	0	1	1	1	0	0	0	0	1	0	0
	45	M00932	Phylloquinone biosynthesis, chorismate (+ phytyl-PP) => phylloquinol	map01110	Biosynthesis of secondary metabolites	---	---	---	menI, DHNAT	1,4-dihydroxy-2-naphthoyl-CoA hydrolase [EC:3.1.2.28]	ec:3.1.2.28	K19222	---	---	0	1	0	0	1	1	0	0	0	1	0	1	1	0	0	0	0	1	1	0	0	0	0	0	0	1	1	1	0	0	0	0	1	0	0
	46	M00932	Phylloquinone biosynthesis, chorismate (+ phytyl-PP) => phylloquinol	map01240	Biosynthesis of cofactors	---	---	---	menI, DHNAT	1,4-dihydroxy-2-naphthoyl-CoA hydrolase [EC:3.1.2.28]	ec:3.1.2.28	K19222	---	---	0	1	0	0	1	1	0	0	0	1	0	1	1	0	0	0	0	1	1	0	0	0	0	0	0	1	1	1	0	0	0	0	1	0	0
	47	M00932	Phylloquinone biosynthesis, chorismate (+ phytyl-PP) => phylloquinol	map00130	Ubiquinone and other terpenoid-quinone biosynthesis	---	---	---	menB	naphthoate synthase [EC:4.1.3.36]	ec:4.1.3.36	K01661	---	---	0	0	0	0	0	0	0	0	0	1	0	0	0	0	0	0	0	0	1	0	0	0	0	0	0	1	0	1	0	0	0	0	0	0	0
	48	M00932	Phylloquinone biosynthesis, chorismate (+ phytyl-PP) => phylloquinol	map01100	Metabolic pathways	---	---	---	menB	naphthoate synthase [EC:4.1.3.36]	ec:4.1.3.36	K01661	---	---	0	0	0	0	0	0	0	0	0	1	0	0	0	0	0	0	0	0	1	0	0	0	0	0	0	1	0	1	0	0	0	0	0	0	0
	49	M00932	Phylloquinone biosynthesis, chorismate (+ phytyl-PP) => phylloquinol	map01110	Biosynthesis of secondary metabolites	---	---	---	menB	naphthoate synthase [EC:4.1.3.36]	ec:4.1.3.36	K01661	---	---	0	0	0	0	0	0	0	0	0	1	0	0	0	0	0	0	0	0	1	0	0	0	0	0	0	1	0	1	0	0	0	0	0	0	0
	50	M00932	Phylloquinone biosynthesis, chorismate (+ phytyl-PP) => phylloquinol	map01240	Biosynthesis of cofactors	---	---	---	menB	naphthoate synthase [EC:4.1.3.36]	ec:4.1.3.36	K01661	---	---	0	0	0	0	0	0	0	0	0	1	0	0	0	0	0	0	0	0	1	0	0	0	0	0	0	1	0	1	0	0	0	0	0	0	0
	51	M00932	Phylloquinone biosynthesis, chorismate (+ phytyl-PP) => phylloquinol	map00130	Ubiquinone and other terpenoid-quinone biosynthesis	---	---	---	menD	2-succinyl-5-enolpyruvyl-6-hydroxy-3-cyclohexene-1-carboxylate synthase [EC:2.2.1.9]	ec:2.2.1.9	K02551	---	---	0	0	0	0	0	0	0	0	0	0	0	0	0	0	0	0	0	0	0	0	0	0	0	0	0	1	0	1	0	0	0	0	0	0	0
	52	M00932	Phylloquinone biosynthesis, chorismate (+ phytyl-PP) => phylloquinol	map01100	Metabolic pathways	---	---	---	menD	2-succinyl-5-enolpyruvyl-6-hydroxy-3-cyclohexene-1-carboxylate synthase [EC:2.2.1.9]	ec:2.2.1.9	K02551	---	---	0	0	0	0	0	0	0	0	0	0	0	0	0	0	0	0	0	0	0	0	0	0	0	0	0	1	0	1	0	0	0	0	0	0	0
	53	M00932	Phylloquinone biosynthesis, chorismate (+ phytyl-PP) => phylloquinol	map01110	Biosynthesis of secondary metabolites	---	---	---	menD	2-succinyl-5-enolpyruvyl-6-hydroxy-3-cyclohexene-1-carboxylate synthase [EC:2.2.1.9]	ec:2.2.1.9	K02551	---	---	0	0	0	0	0	0	0	0	0	0	0	0	0	0	0	0	0	0	0	0	0	0	0	0	0	1	0	1	0	0	0	0	0	0	0
	54	M00932	Phylloquinone biosynthesis, chorismate (+ phytyl-PP) => phylloquinol	map01240	Biosynthesis of cofactors	---	---	---	menD	2-succinyl-5-enolpyruvyl-6-hydroxy-3-cyclohexene-1-carboxylate synthase [EC:2.2.1.9]	ec:2.2.1.9	K02551	---	---	0	0	0	0	0	0	0	0	0	0	0	0	0	0	0	0	0	0	0	0	0	0	0	0	0	1	0	1	0	0	0	0	0	0	0
	55	M00930	Menaquinone biosynthesis, futalosine pathway	map00130	Ubiquinone and other terpenoid-quinone biosynthesis	---	---	---	mqnX	aminodeoxyfutalosine deaminase [EC:3.5.4.40]	ec:3.5.4.40	K20810	---	---	0	0	1	0	0	0	0	0	0	0	0	0	0	0	0	0	0	0	0	0	0	0	0	0	0	0	0	0	0	0	1	0	0	0	0
	56	M00930	Menaquinone biosynthesis, futalosine pathway	map01100	Metabolic pathways	---	---	---	mqnX	aminodeoxyfutalosine deaminase [EC:3.5.4.40]	ec:3.5.4.40	K20810	---	---	0	0	1	0	0	0	0	0	0	0	0	0	0	0	0	0	0	0	0	0	0	0	0	0	0	0	0	0	0	0	1	0	0	0	0
	57	M00930	Menaquinone biosynthesis, futalosine pathway	map01110	Biosynthesis of secondary metabolites	---	---	---	mqnX	aminodeoxyfutalosine deaminase [EC:3.5.4.40]	ec:3.5.4.40	K20810	---	---	0	0	1	0	0	0	0	0	0	0	0	0	0	0	0	0	0	0	0	0	0	0	0	0	0	0	0	0	0	0	1	0	0	0	0
	58	M00930	Menaquinone biosynthesis, futalosine pathway	map01240	Biosynthesis of cofactors	---	---	---	mqnX	aminodeoxyfutalosine deaminase [EC:3.5.4.40]	ec:3.5.4.40	K20810	---	---	0	0	1	0	0	0	0	0	0	0	0	0	0	0	0	0	0	0	0	0	0	0	0	0	0	0	0	0	0	0	1	0	0	0	0
	59	M00926	Heme biosynthesis, bacteria, glutamyl-tRNA => coproporphyrin III => heme	map00860	Porphyrin and chlorophyll metabolism	---	---	---	hemC, HMBS	hydroxymethylbilane synthase [EC:2.5.1.61]	ec:2.5.1.61	K01749	---	---	1	1	1	1	1	1	1	1	1	1	1	1	1	1	2	1	1	1	1	1	1	1	2	1	1	1	1	1	1	1	1	1	1	1	1
	60	M00926	Heme biosynthesis, bacteria, glutamyl-tRNA => coproporphyrin III => heme	map01100	Metabolic pathways	---	---	---	hemC, HMBS	hydroxymethylbilane synthase [EC:2.5.1.61]	ec:2.5.1.61	K01749	---	---	1	1	1	1	1	1	1	1	1	1	1	1	1	1	2	1	1	1	1	1	1	1	2	1	1	1	1	1	1	1	1	1	1	1	1
	61	M00926	Heme biosynthesis, bacteria, glutamyl-tRNA => coproporphyrin III => heme	map01110	Biosynthesis of secondary metabolites	---	---	---	hemC, HMBS	hydroxymethylbilane synthase [EC:2.5.1.61]	ec:2.5.1.61	K01749	---	---	1	1	1	1	1	1	1	1	1	1	1	1	1	1	2	1	1	1	1	1	1	1	2	1	1	1	1	1	1	1	1	1	1	1	1
	62	M00926	Heme biosynthesis, bacteria, glutamyl-tRNA => coproporphyrin III => heme	map01120	Microbial metabolism in diverse environments	---	---	---	hemC, HMBS	hydroxymethylbilane synthase [EC:2.5.1.61]	ec:2.5.1.61	K01749	---	---	1	1	1	1	1	1	1	1	1	1	1	1	1	1	2	1	1	1	1	1	1	1	2	1	1	1	1	1	1	1	1	1	1	1	1
	63	M00926	Heme biosynthesis, bacteria, glutamyl-tRNA => coproporphyrin III => heme	map01240	Biosynthesis of cofactors	---	---	---	hemC, HMBS	hydroxymethylbilane synthase [EC:2.5.1.61]	ec:2.5.1.61	K01749	---	---	1	1	1	1	1	1	1	1	1	1	1	1	1	1	2	1	1	1	1	1	1	1	2	1	1	1	1	1	1	1	1	1	1	1	1
	64	M00926	Heme biosynthesis, bacteria, glutamyl-tRNA => coproporphyrin III => heme	map00860	Porphyrin and chlorophyll metabolism	---	---	---	hemE, UROD	uroporphyrinogen decarboxylase [EC:4.1.1.37]	ec:4.1.1.37	K01599	---	---	1	1	1	1	1	1	1	1	1	1	1	1	1	1	2	1	1	1	1	1	1	1	1	1	1	1	1	1	1	1	1	1	1	1	1
	65	M00926	Heme biosynthesis, bacteria, glutamyl-tRNA => coproporphyrin III => heme	map01100	Metabolic pathways	---	---	---	hemE, UROD	uroporphyrinogen decarboxylase [EC:4.1.1.37]	ec:4.1.1.37	K01599	---	---	1	1	1	1	1	1	1	1	1	1	1	1	1	1	2	1	1	1	1	1	1	1	1	1	1	1	1	1	1	1	1	1	1	1	1
	66	M00926	Heme biosynthesis, bacteria, glutamyl-tRNA => coproporphyrin III => heme	map01110	Biosynthesis of secondary metabolites	---	---	---	hemE, UROD	uroporphyrinogen decarboxylase [EC:4.1.1.37]	ec:4.1.1.37	K01599	---	---	1	1	1	1	1	1	1	1	1	1	1	1	1	1	2	1	1	1	1	1	1	1	1	1	1	1	1	1	1	1	1	1	1	1	1
	67	M00926	Heme biosynthesis, bacteria, glutamyl-tRNA => coproporphyrin III => heme	map01240	Biosynthesis of cofactors	---	---	---	hemE, UROD	uroporphyrinogen decarboxylase [EC:4.1.1.37]	ec:4.1.1.37	K01599	---	---	1	1	1	1	1	1	1	1	1	1	1	1	1	1	2	1	1	1	1	1	1	1	1	1	1	1	1	1	1	1	1	1	1	1	1
	68	M00926	Heme biosynthesis, bacteria, glutamyl-tRNA => coproporphyrin III => heme	map00860	Porphyrin and chlorophyll metabolism	---	---	---	hemD, UROS	uroporphyrinogen-III synthase [EC:4.2.1.75]	ec:4.2.1.75	K01719	---	---	1	1	1	1	1	1	1	1	1	2	1	1	1	1	1	1	1	1	2	1	1	1	2	1	0	2	1	2	1	1	1	1	1	1	1
	69	M00926	Heme biosynthesis, bacteria, glutamyl-tRNA => coproporphyrin III => heme	map01100	Metabolic pathways	---	---	---	hemD, UROS	uroporphyrinogen-III synthase [EC:4.2.1.75]	ec:4.2.1.75	K01719	---	---	1	1	1	1	1	1	1	1	1	2	1	1	1	1	1	1	1	1	2	1	1	1	2	1	0	2	1	2	1	1	1	1	1	1	1
	70	M00926	Heme biosynthesis, bacteria, glutamyl-tRNA => coproporphyrin III => heme	map01110	Biosynthesis of secondary metabolites	---	---	---	hemD, UROS	uroporphyrinogen-III synthase [EC:4.2.1.75]	ec:4.2.1.75	K01719	---	---	1	1	1	1	1	1	1	1	1	2	1	1	1	1	1	1	1	1	2	1	1	1	2	1	0	2	1	2	1	1	1	1	1	1	1
	71	M00926	Heme biosynthesis, bacteria, glutamyl-tRNA => coproporphyrin III => heme	map01120	Microbial metabolism in diverse environments	---	---	---	hemD, UROS	uroporphyrinogen-III synthase [EC:4.2.1.75]	ec:4.2.1.75	K01719	---	---	1	1	1	1	1	1	1	1	1	2	1	1	1	1	1	1	1	1	2	1	1	1	2	1	0	2	1	2	1	1	1	1	1	1	1
	72	M00926	Heme biosynthesis, bacteria, glutamyl-tRNA => coproporphyrin III => heme	map01240	Biosynthesis of cofactors	---	---	---	hemD, UROS	uroporphyrinogen-III synthase [EC:4.2.1.75]	ec:4.2.1.75	K01719	---	---	1	1	1	1	1	1	1	1	1	2	1	1	1	1	1	1	1	1	2	1	1	1	2	1	0	2	1	2	1	1	1	1	1	1	1
	73	M00926	Heme biosynthesis, bacteria, glutamyl-tRNA => coproporphyrin III => heme	map00860	Porphyrin and chlorophyll metabolism	---	---	---	hemH, FECH	protoporphyrin/coproporphyrin ferrochelatase [EC:4.99.1.1 4.99.1.9]	ec:4.99.1.1	K01772	---	---	1	1	1	1	1	1	1	1	1	1	1	1	1	1	1	1	1	1	1	1	1	1	1	1	1	1	1	1	1	1	1	1	1	1	1
	74	M00926	Heme biosynthesis, bacteria, glutamyl-tRNA => coproporphyrin III => heme	map00860	Porphyrin and chlorophyll metabolism	---	---	---	hemH, FECH	protoporphyrin/coproporphyrin ferrochelatase [EC:4.99.1.1 4.99.1.9]	ec:4.99.1.9	K01772	---	---	1	1	1	1	1	1	1	1	1	1	1	1	1	1	1	1	1	1	1	1	1	1	1	1	1	1	1	1	1	1	1	1	1	1	1
	75	M00926	Heme biosynthesis, bacteria, glutamyl-tRNA => coproporphyrin III => heme	map01100	Metabolic pathways	---	---	---	hemH, FECH	protoporphyrin/coproporphyrin ferrochelatase [EC:4.99.1.1 4.99.1.9]	ec:4.99.1.1	K01772	---	---	1	1	1	1	1	1	1	1	1	1	1	1	1	1	1	1	1	1	1	1	1	1	1	1	1	1	1	1	1	1	1	1	1	1	1
	76	M00926	Heme biosynthesis, bacteria, glutamyl-tRNA => coproporphyrin III => heme	map01100	Metabolic pathways	---	---	---	hemH, FECH	protoporphyrin/coproporphyrin ferrochelatase [EC:4.99.1.1 4.99.1.9]	ec:4.99.1.9	K01772	---	---	1	1	1	1	1	1	1	1	1	1	1	1	1	1	1	1	1	1	1	1	1	1	1	1	1	1	1	1	1	1	1	1	1	1	1
	77	M00926	Heme biosynthesis, bacteria, glutamyl-tRNA => coproporphyrin III => heme	map01110	Biosynthesis of secondary metabolites	---	---	---	hemH, FECH	protoporphyrin/coproporphyrin ferrochelatase [EC:4.99.1.1 4.99.1.9]	ec:4.99.1.1	K01772	---	---	1	1	1	1	1	1	1	1	1	1	1	1	1	1	1	1	1	1	1	1	1	1	1	1	1	1	1	1	1	1	1	1	1	1	1
	78	M00926	Heme biosynthesis, bacteria, glutamyl-tRNA => coproporphyrin III => heme	map01110	Biosynthesis of secondary metabolites	---	---	---	hemH, FECH	protoporphyrin/coproporphyrin ferrochelatase [EC:4.99.1.1 4.99.1.9]	ec:4.99.1.9	K01772	---	---	1	1	1	1	1	1	1	1	1	1	1	1	1	1	1	1	1	1	1	1	1	1	1	1	1	1	1	1	1	1	1	1	1	1	1
	79	M00926	Heme biosynthesis, bacteria, glutamyl-tRNA => coproporphyrin III => heme	map01240	Biosynthesis of cofactors	---	---	---	hemH, FECH	protoporphyrin/coproporphyrin ferrochelatase [EC:4.99.1.1 4.99.1.9]	ec:4.99.1.1	K01772	---	---	1	1	1	1	1	1	1	1	1	1	1	1	1	1	1	1	1	1	1	1	1	1	1	1	1	1	1	1	1	1	1	1	1	1	1
	80	M00926	Heme biosynthesis, bacteria, glutamyl-tRNA => coproporphyrin III => heme	map01240	Biosynthesis of cofactors	---	---	---	hemH, FECH	protoporphyrin/coproporphyrin ferrochelatase [EC:4.99.1.1 4.99.1.9]	ec:4.99.1.9	K01772	---	---	1	1	1	1	1	1	1	1	1	1	1	1	1	1	1	1	1	1	1	1	1	1	1	1	1	1	1	1	1	1	1	1	1	1	1
	81	M00926	Heme biosynthesis, bacteria, glutamyl-tRNA => coproporphyrin III => heme	map00860	Porphyrin and chlorophyll metabolism	---	---	---	hemB, ALAD	porphobilinogen synthase [EC:4.2.1.24]	ec:4.2.1.24	K01698	---	---	1	1	1	1	1	0	1	1	1	1	1	1	1	1	1	1	1	1	1	1	1	1	1	1	1	1	1	1	1	1	1	1	1	1	1
	82	M00926	Heme biosynthesis, bacteria, glutamyl-tRNA => coproporphyrin III => heme	map01100	Metabolic pathways	---	---	---	hemB, ALAD	porphobilinogen synthase [EC:4.2.1.24]	ec:4.2.1.24	K01698	---	---	1	1	1	1	1	0	1	1	1	1	1	1	1	1	1	1	1	1	1	1	1	1	1	1	1	1	1	1	1	1	1	1	1	1	1
	83	M00926	Heme biosynthesis, bacteria, glutamyl-tRNA => coproporphyrin III => heme	map01110	Biosynthesis of secondary metabolites	---	---	---	hemB, ALAD	porphobilinogen synthase [EC:4.2.1.24]	ec:4.2.1.24	K01698	---	---	1	1	1	1	1	0	1	1	1	1	1	1	1	1	1	1	1	1	1	1	1	1	1	1	1	1	1	1	1	1	1	1	1	1	1
	84	M00926	Heme biosynthesis, bacteria, glutamyl-tRNA => coproporphyrin III => heme	map01120	Microbial metabolism in diverse environments	---	---	---	hemB, ALAD	porphobilinogen synthase [EC:4.2.1.24]	ec:4.2.1.24	K01698	---	---	1	1	1	1	1	0	1	1	1	1	1	1	1	1	1	1	1	1	1	1	1	1	1	1	1	1	1	1	1	1	1	1	1	1	1
	85	M00926	Heme biosynthesis, bacteria, glutamyl-tRNA => coproporphyrin III => heme	map01240	Biosynthesis of cofactors	---	---	---	hemB, ALAD	porphobilinogen synthase [EC:4.2.1.24]	ec:4.2.1.24	K01698	---	---	1	1	1	1	1	0	1	1	1	1	1	1	1	1	1	1	1	1	1	1	1	1	1	1	1	1	1	1	1	1	1	1	1	1	1
	86	M00926	Heme biosynthesis, bacteria, glutamyl-tRNA => coproporphyrin III => heme	map00860	Porphyrin and chlorophyll metabolism	---	---	---	hemL	glutamate-1-semialdehyde 2,1-aminomutase [EC:5.4.3.8]	ec:5.4.3.8	K01845	---	---	0	1	1	0	0	1	1	0	1	1	1	0	0	0	0	1	0	1	1	1	0	0	1	0	0	1	1	1	1	0	1	1	1	0	0
	87	M00926	Heme biosynthesis, bacteria, glutamyl-tRNA => coproporphyrin III => heme	map01100	Metabolic pathways	---	---	---	hemL	glutamate-1-semialdehyde 2,1-aminomutase [EC:5.4.3.8]	ec:5.4.3.8	K01845	---	---	0	1	1	0	0	1	1	0	1	1	1	0	0	0	0	1	0	1	1	1	0	0	1	0	0	1	1	1	1	0	1	1	1	0	0
	88	M00926	Heme biosynthesis, bacteria, glutamyl-tRNA => coproporphyrin III => heme	map01110	Biosynthesis of secondary metabolites	---	---	---	hemL	glutamate-1-semialdehyde 2,1-aminomutase [EC:5.4.3.8]	ec:5.4.3.8	K01845	---	---	0	1	1	0	0	1	1	0	1	1	1	0	0	0	0	1	0	1	1	1	0	0	1	0	0	1	1	1	1	0	1	1	1	0	0
	89	M00926	Heme biosynthesis, bacteria, glutamyl-tRNA => coproporphyrin III => heme	map01120	Microbial metabolism in diverse environments	---	---	---	hemL	glutamate-1-semialdehyde 2,1-aminomutase [EC:5.4.3.8]	ec:5.4.3.8	K01845	---	---	0	1	1	0	0	1	1	0	1	1	1	0	0	0	0	1	0	1	1	1	0	0	1	0	0	1	1	1	1	0	1	1	1	0	0
	90	M00926	Heme biosynthesis, bacteria, glutamyl-tRNA => coproporphyrin III => heme	map01240	Biosynthesis of cofactors	---	---	---	hemL	glutamate-1-semialdehyde 2,1-aminomutase [EC:5.4.3.8]	ec:5.4.3.8	K01845	---	---	0	1	1	0	0	1	1	0	1	1	1	0	0	0	0	1	0	1	1	1	0	0	1	0	0	1	1	1	1	0	1	1	1	0	0
	91	M00926	Heme biosynthesis, bacteria, glutamyl-tRNA => coproporphyrin III => heme	map00860	Porphyrin and chlorophyll metabolism	---	---	---	hemA	glutamyl-tRNA reductase [EC:1.2.1.70]	ec:1.2.1.70	K02492	---	---	0	1	1	0	0	1	1	0	1	1	1	0	0	0	0	0	0	1	1	1	0	0	1	0	0	1	1	1	1	0	1	2	1	0	0
	92	M00926	Heme biosynthesis, bacteria, glutamyl-tRNA => coproporphyrin III => heme	map01100	Metabolic pathways	---	---	---	hemA	glutamyl-tRNA reductase [EC:1.2.1.70]	ec:1.2.1.70	K02492	---	---	0	1	1	0	0	1	1	0	1	1	1	0	0	0	0	0	0	1	1	1	0	0	1	0	0	1	1	1	1	0	1	2	1	0	0
	93	M00926	Heme biosynthesis, bacteria, glutamyl-tRNA => coproporphyrin III => heme	map01110	Biosynthesis of secondary metabolites	---	---	---	hemA	glutamyl-tRNA reductase [EC:1.2.1.70]	ec:1.2.1.70	K02492	---	---	0	1	1	0	0	1	1	0	1	1	1	0	0	0	0	0	0	1	1	1	0	0	1	0	0	1	1	1	1	0	1	2	1	0	0
	94	M00926	Heme biosynthesis, bacteria, glutamyl-tRNA => coproporphyrin III => heme	map01120	Microbial metabolism in diverse environments	---	---	---	hemA	glutamyl-tRNA reductase [EC:1.2.1.70]	ec:1.2.1.70	K02492	---	---	0	1	1	0	0	1	1	0	1	1	1	0	0	0	0	0	0	1	1	1	0	0	1	0	0	1	1	1	1	0	1	2	1	0	0
	95	M00926	Heme biosynthesis, bacteria, glutamyl-tRNA => coproporphyrin III => heme	map01240	Biosynthesis of cofactors	---	---	---	hemA	glutamyl-tRNA reductase [EC:1.2.1.70]	ec:1.2.1.70	K02492	---	---	0	1	1	0	0	1	1	0	1	1	1	0	0	0	0	0	0	1	1	1	0	0	1	0	0	1	1	1	1	0	1	2	1	0	0
	96	M00925	Cobalamin biosynthesis, aerobic, uroporphyrinogen III => precorrin 2 => cobyrinate a,c-diamide	map00860	Porphyrin and chlorophyll metabolism	---	---	---	cobS	cobaltochelatase CobS [EC:6.6.1.2]	ec:6.6.1.2	K09882	---	---	1	0	0	1	1	0	0	1	0	0	0	1	1	1	1	0	1	0	0	0	1	1	0	1	0	0	0	0	0	1	0	0	0	1	1
	97	M00925	Cobalamin biosynthesis, aerobic, uroporphyrinogen III => precorrin 2 => cobyrinate a,c-diamide	map01100	Metabolic pathways	---	---	---	cobS	cobaltochelatase CobS [EC:6.6.1.2]	ec:6.6.1.2	K09882	---	---	1	0	0	1	1	0	0	1	0	0	0	1	1	1	1	0	1	0	0	0	1	1	0	1	0	0	0	0	0	1	0	0	0	1	1
	98	M00925	Cobalamin biosynthesis, aerobic, uroporphyrinogen III => precorrin 2 => cobyrinate a,c-diamide	map01240	Biosynthesis of cofactors	---	---	---	cobS	cobaltochelatase CobS [EC:6.6.1.2]	ec:6.6.1.2	K09882	---	---	1	0	0	1	1	0	0	1	0	0	0	1	1	1	1	0	1	0	0	0	1	1	0	1	0	0	0	0	0	1	0	0	0	1	1
	99	M00925	Cobalamin biosynthesis, aerobic, uroporphyrinogen III => precorrin 2 => cobyrinate a,c-diamide	map00860	Porphyrin and chlorophyll metabolism	---	---	---	cobA	uroporphyrin-III C-methyltransferase [EC:2.1.1.107]	ec:2.1.1.107	K02303	---	---	1	1	1	1	1	1	2	0	1	0	1	2	1	3	3	1	1	1	0	1	3	3	2	1	0	0	2	0	2	1	1	2	1	2	2
	100	M00925	Cobalamin biosynthesis, aerobic, uroporphyrinogen III => precorrin 2 => cobyrinate a,c-diamide	map01100	Metabolic pathways	---	---	---	cobA	uroporphyrin-III C-methyltransferase [EC:2.1.1.107]	ec:2.1.1.107	K02303	---	---	1	1	1	1	1	1	2	0	1	0	1	2	1	3	3	1	1	1	0	1	3	3	2	1	0	0	2	0	2	1	1	2	1	2	2
	101	M00925	Cobalamin biosynthesis, aerobic, uroporphyrinogen III => precorrin 2 => cobyrinate a,c-diamide	map01110	Biosynthesis of secondary metabolites	---	---	---	cobA	uroporphyrin-III C-methyltransferase [EC:2.1.1.107]	ec:2.1.1.107	K02303	---	---	1	1	1	1	1	1	2	0	1	0	1	2	1	3	3	1	1	1	0	1	3	3	2	1	0	0	2	0	2	1	1	2	1	2	2
	102	M00925	Cobalamin biosynthesis, aerobic, uroporphyrinogen III => precorrin 2 => cobyrinate a,c-diamide	map01120	Microbial metabolism in diverse environments	---	---	---	cobA	uroporphyrin-III C-methyltransferase [EC:2.1.1.107]	ec:2.1.1.107	K02303	---	---	1	1	1	1	1	1	2	0	1	0	1	2	1	3	3	1	1	1	0	1	3	3	2	1	0	0	2	0	2	1	1	2	1	2	2
	103	M00925	Cobalamin biosynthesis, aerobic, uroporphyrinogen III => precorrin 2 => cobyrinate a,c-diamide	map01240	Biosynthesis of cofactors	---	---	---	cobA	uroporphyrin-III C-methyltransferase [EC:2.1.1.107]	ec:2.1.1.107	K02303	---	---	1	1	1	1	1	1	2	0	1	0	1	2	1	3	3	1	1	1	0	1	3	3	2	1	0	0	2	0	2	1	1	2	1	2	2
	104	M00925	Cobalamin biosynthesis, aerobic, uroporphyrinogen III => precorrin 2 => cobyrinate a,c-diamide	map00860	Porphyrin and chlorophyll metabolism	---	---	---	cobT	cobaltochelatase CobT [EC:6.6.1.2]	ec:6.6.1.2	K09883	---	---	1	0	0	1	1	0	0	2	0	0	0	1	1	1	1	0	1	0	0	0	1	1	0	1	0	0	0	0	0	1	0	0	0	1	1
	105	M00925	Cobalamin biosynthesis, aerobic, uroporphyrinogen III => precorrin 2 => cobyrinate a,c-diamide	map01100	Metabolic pathways	---	---	---	cobT	cobaltochelatase CobT [EC:6.6.1.2]	ec:6.6.1.2	K09883	---	---	1	0	0	1	1	0	0	2	0	0	0	1	1	1	1	0	1	0	0	0	1	1	0	1	0	0	0	0	0	1	0	0	0	1	1
	106	M00925	Cobalamin biosynthesis, aerobic, uroporphyrinogen III => precorrin 2 => cobyrinate a,c-diamide	map01240	Biosynthesis of cofactors	---	---	---	cobT	cobaltochelatase CobT [EC:6.6.1.2]	ec:6.6.1.2	K09883	---	---	1	0	0	1	1	0	0	2	0	0	0	1	1	1	1	0	1	0	0	0	1	1	0	1	0	0	0	0	0	1	0	0	0	1	1
	107	M00925	Cobalamin biosynthesis, aerobic, uroporphyrinogen III => precorrin 2 => cobyrinate a,c-diamide	map00860	Porphyrin and chlorophyll metabolism	---	---	---	cobN	cobaltochelatase CobN [EC:6.6.1.2]	ec:6.6.1.2	K02230	---	---	0	1	0	0	0	0	0	1	0	0	0	0	0	1	1	0	0	1	0	0	1	1	0	0	0	0	0	0	0	0	0	0	1	0	0
	108	M00925	Cobalamin biosynthesis, aerobic, uroporphyrinogen III => precorrin 2 => cobyrinate a,c-diamide	map01100	Metabolic pathways	---	---	---	cobN	cobaltochelatase CobN [EC:6.6.1.2]	ec:6.6.1.2	K02230	---	---	0	1	0	0	0	0	0	1	0	0	0	0	0	1	1	0	0	1	0	0	1	1	0	0	0	0	0	0	0	0	0	0	1	0	0
	109	M00925	Cobalamin biosynthesis, aerobic, uroporphyrinogen III => precorrin 2 => cobyrinate a,c-diamide	map01240	Biosynthesis of cofactors	---	---	---	cobN	cobaltochelatase CobN [EC:6.6.1.2]	ec:6.6.1.2	K02230	---	---	0	1	0	0	0	0	0	1	0	0	0	0	0	1	1	0	0	1	0	0	1	1	0	0	0	0	0	0	0	0	0	0	1	0	0
	110	M00925	Cobalamin biosynthesis, aerobic, uroporphyrinogen III => precorrin 2 => cobyrinate a,c-diamide	map00860	Porphyrin and chlorophyll metabolism	---	---	---	cobB-cbiA	cobyrinic acid a,c-diamide synthase [EC:6.3.5.9 6.3.5.11]	ec:6.3.5.9	K02224	---	---	0	1	0	0	0	0	0	1	1	0	0	0	0	1	1	0	0	1	0	1	1	1	0	0	1	0	0	0	0	1	1	0	1	0	0
	111	M00925	Cobalamin biosynthesis, aerobic, uroporphyrinogen III => precorrin 2 => cobyrinate a,c-diamide	map00860	Porphyrin and chlorophyll metabolism	---	---	---	cobB-cbiA	cobyrinic acid a,c-diamide synthase [EC:6.3.5.9 6.3.5.11]	ec:6.3.5.11	K02224	---	---	0	1	0	0	0	0	0	1	1	0	0	0	0	1	1	0	0	1	0	1	1	1	0	0	1	0	0	0	0	1	1	0	1	0	0
	112	M00925	Cobalamin biosynthesis, aerobic, uroporphyrinogen III => precorrin 2 => cobyrinate a,c-diamide	map01100	Metabolic pathways	---	---	---	cobB-cbiA	cobyrinic acid a,c-diamide synthase [EC:6.3.5.9 6.3.5.11]	ec:6.3.5.9	K02224	---	---	0	1	0	0	0	0	0	1	1	0	0	0	0	1	1	0	0	1	0	1	1	1	0	0	1	0	0	0	0	1	1	0	1	0	0
	113	M00925	Cobalamin biosynthesis, aerobic, uroporphyrinogen III => precorrin 2 => cobyrinate a,c-diamide	map01100	Metabolic pathways	---	---	---	cobB-cbiA	cobyrinic acid a,c-diamide synthase [EC:6.3.5.9 6.3.5.11]	ec:6.3.5.11	K02224	---	---	0	1	0	0	0	0	0	1	1	0	0	0	0	1	1	0	0	1	0	1	1	1	0	0	1	0	0	0	0	1	1	0	1	0	0
	114	M00925	Cobalamin biosynthesis, aerobic, uroporphyrinogen III => precorrin 2 => cobyrinate a,c-diamide	map01240	Biosynthesis of cofactors	---	---	---	cobB-cbiA	cobyrinic acid a,c-diamide synthase [EC:6.3.5.9 6.3.5.11]	ec:6.3.5.9	K02224	---	---	0	1	0	0	0	0	0	1	1	0	0	0	0	1	1	0	0	1	0	1	1	1	0	0	1	0	0	0	0	1	1	0	1	0	0
	115	M00925	Cobalamin biosynthesis, aerobic, uroporphyrinogen III => precorrin 2 => cobyrinate a,c-diamide	map01240	Biosynthesis of cofactors	---	---	---	cobB-cbiA	cobyrinic acid a,c-diamide synthase [EC:6.3.5.9 6.3.5.11]	ec:6.3.5.11	K02224	---	---	0	1	0	0	0	0	0	1	1	0	0	0	0	1	1	0	0	1	0	1	1	1	0	0	1	0	0	0	0	1	1	0	1	0	0
	116	M00925	Cobalamin biosynthesis, aerobic, uroporphyrinogen III => precorrin 2 => cobyrinate a,c-diamide	map00860	Porphyrin and chlorophyll metabolism	---	---	---	cobK-cbiJ	precorrin-6A/cobalt-precorrin-6A reductase [EC:1.3.1.54 1.3.1.106]	ec:1.3.1.54	K05895	---	---	0	0	0	1	0	0	0	0	0	0	0	0	0	1	1	0	0	0	0	0	1	1	0	1	1	0	0	0	0	1	0	0	0	0	0
	117	M00925	Cobalamin biosynthesis, aerobic, uroporphyrinogen III => precorrin 2 => cobyrinate a,c-diamide	map00860	Porphyrin and chlorophyll metabolism	---	---	---	cobK-cbiJ	precorrin-6A/cobalt-precorrin-6A reductase [EC:1.3.1.54 1.3.1.106]	ec:1.3.1.106	K05895	---	---	0	0	0	1	0	0	0	0	0	0	0	0	0	1	1	0	0	0	0	0	1	1	0	1	1	0	0	0	0	1	0	0	0	0	0
	118	M00925	Cobalamin biosynthesis, aerobic, uroporphyrinogen III => precorrin 2 => cobyrinate a,c-diamide	map01100	Metabolic pathways	---	---	---	cobK-cbiJ	precorrin-6A/cobalt-precorrin-6A reductase [EC:1.3.1.54 1.3.1.106]	ec:1.3.1.54	K05895	---	---	0	0	0	1	0	0	0	0	0	0	0	0	0	1	1	0	0	0	0	0	1	1	0	1	1	0	0	0	0	1	0	0	0	0	0
	119	M00925	Cobalamin biosynthesis, aerobic, uroporphyrinogen III => precorrin 2 => cobyrinate a,c-diamide	map01100	Metabolic pathways	---	---	---	cobK-cbiJ	precorrin-6A/cobalt-precorrin-6A reductase [EC:1.3.1.54 1.3.1.106]	ec:1.3.1.106	K05895	---	---	0	0	0	1	0	0	0	0	0	0	0	0	0	1	1	0	0	0	0	0	1	1	0	1	1	0	0	0	0	1	0	0	0	0	0
	120	M00925	Cobalamin biosynthesis, aerobic, uroporphyrinogen III => precorrin 2 => cobyrinate a,c-diamide	map01240	Biosynthesis of cofactors	---	---	---	cobK-cbiJ	precorrin-6A/cobalt-precorrin-6A reductase [EC:1.3.1.54 1.3.1.106]	ec:1.3.1.54	K05895	---	---	0	0	0	1	0	0	0	0	0	0	0	0	0	1	1	0	0	0	0	0	1	1	0	1	1	0	0	0	0	1	0	0	0	0	0
	121	M00925	Cobalamin biosynthesis, aerobic, uroporphyrinogen III => precorrin 2 => cobyrinate a,c-diamide	map01240	Biosynthesis of cofactors	---	---	---	cobK-cbiJ	precorrin-6A/cobalt-precorrin-6A reductase [EC:1.3.1.54 1.3.1.106]	ec:1.3.1.106	K05895	---	---	0	0	0	1	0	0	0	0	0	0	0	0	0	1	1	0	0	0	0	0	1	1	0	1	1	0	0	0	0	1	0	0	0	0	0
	122	M00925	Cobalamin biosynthesis, aerobic, uroporphyrinogen III => precorrin 2 => cobyrinate a,c-diamide	map00860	Porphyrin and chlorophyll metabolism	---	---	---	cobM, cbiF	precorrin-4/cobalt-precorrin-4 C11-methyltransferase [EC:2.1.1.133 2.1.1.271]	ec:2.1.1.133	K05936	---	---	0	0	0	0	0	0	0	1	0	0	0	0	0	1	1	0	0	0	0	0	1	1	0	0	1	0	0	0	0	1	0	0	0	0	0
	123	M00925	Cobalamin biosynthesis, aerobic, uroporphyrinogen III => precorrin 2 => cobyrinate a,c-diamide	map00860	Porphyrin and chlorophyll metabolism	---	---	---	cobM, cbiF	precorrin-4/cobalt-precorrin-4 C11-methyltransferase [EC:2.1.1.133 2.1.1.271]	ec:2.1.1.271	K05936	---	---	0	0	0	0	0	0	0	1	0	0	0	0	0	1	1	0	0	0	0	0	1	1	0	0	1	0	0	0	0	1	0	0	0	0	0
	124	M00925	Cobalamin biosynthesis, aerobic, uroporphyrinogen III => precorrin 2 => cobyrinate a,c-diamide	map01100	Metabolic pathways	---	---	---	cobM, cbiF	precorrin-4/cobalt-precorrin-4 C11-methyltransferase [EC:2.1.1.133 2.1.1.271]	ec:2.1.1.133	K05936	---	---	0	0	0	0	0	0	0	1	0	0	0	0	0	1	1	0	0	0	0	0	1	1	0	0	1	0	0	0	0	1	0	0	0	0	0
	125	M00925	Cobalamin biosynthesis, aerobic, uroporphyrinogen III => precorrin 2 => cobyrinate a,c-diamide	map01100	Metabolic pathways	---	---	---	cobM, cbiF	precorrin-4/cobalt-precorrin-4 C11-methyltransferase [EC:2.1.1.133 2.1.1.271]	ec:2.1.1.271	K05936	---	---	0	0	0	0	0	0	0	1	0	0	0	0	0	1	1	0	0	0	0	0	1	1	0	0	1	0	0	0	0	1	0	0	0	0	0
	126	M00925	Cobalamin biosynthesis, aerobic, uroporphyrinogen III => precorrin 2 => cobyrinate a,c-diamide	map01240	Biosynthesis of cofactors	---	---	---	cobM, cbiF	precorrin-4/cobalt-precorrin-4 C11-methyltransferase [EC:2.1.1.133 2.1.1.271]	ec:2.1.1.133	K05936	---	---	0	0	0	0	0	0	0	1	0	0	0	0	0	1	1	0	0	0	0	0	1	1	0	0	1	0	0	0	0	1	0	0	0	0	0
	127	M00925	Cobalamin biosynthesis, aerobic, uroporphyrinogen III => precorrin 2 => cobyrinate a,c-diamide	map01240	Biosynthesis of cofactors	---	---	---	cobM, cbiF	precorrin-4/cobalt-precorrin-4 C11-methyltransferase [EC:2.1.1.133 2.1.1.271]	ec:2.1.1.271	K05936	---	---	0	0	0	0	0	0	0	1	0	0	0	0	0	1	1	0	0	0	0	0	1	1	0	0	1	0	0	0	0	1	0	0	0	0	0
	128	M00925	Cobalamin biosynthesis, aerobic, uroporphyrinogen III => precorrin 2 => cobyrinate a,c-diamide	map00860	Porphyrin and chlorophyll metabolism	---	---	---	cobI-cbiL	precorrin-2/cobalt-factor-2 C20-methyltransferase [EC:2.1.1.130 2.1.1.151]	ec:2.1.1.130	K03394	---	---	0	0	0	0	0	0	0	1	0	0	0	0	0	1	1	0	0	0	0	0	1	1	0	0	0	0	0	0	0	1	0	0	0	0	0
	129	M00925	Cobalamin biosynthesis, aerobic, uroporphyrinogen III => precorrin 2 => cobyrinate a,c-diamide	map00860	Porphyrin and chlorophyll metabolism	---	---	---	cobI-cbiL	precorrin-2/cobalt-factor-2 C20-methyltransferase [EC:2.1.1.130 2.1.1.151]	ec:2.1.1.151	K03394	---	---	0	0	0	0	0	0	0	1	0	0	0	0	0	1	1	0	0	0	0	0	1	1	0	0	0	0	0	0	0	1	0	0	0	0	0
	130	M00925	Cobalamin biosynthesis, aerobic, uroporphyrinogen III => precorrin 2 => cobyrinate a,c-diamide	map01100	Metabolic pathways	---	---	---	cobI-cbiL	precorrin-2/cobalt-factor-2 C20-methyltransferase [EC:2.1.1.130 2.1.1.151]	ec:2.1.1.130	K03394	---	---	0	0	0	0	0	0	0	1	0	0	0	0	0	1	1	0	0	0	0	0	1	1	0	0	0	0	0	0	0	1	0	0	0	0	0
	131	M00925	Cobalamin biosynthesis, aerobic, uroporphyrinogen III => precorrin 2 => cobyrinate a,c-diamide	map01100	Metabolic pathways	---	---	---	cobI-cbiL	precorrin-2/cobalt-factor-2 C20-methyltransferase [EC:2.1.1.130 2.1.1.151]	ec:2.1.1.151	K03394	---	---	0	0	0	0	0	0	0	1	0	0	0	0	0	1	1	0	0	0	0	0	1	1	0	0	0	0	0	0	0	1	0	0	0	0	0
	132	M00925	Cobalamin biosynthesis, aerobic, uroporphyrinogen III => precorrin 2 => cobyrinate a,c-diamide	map01240	Biosynthesis of cofactors	---	---	---	cobI-cbiL	precorrin-2/cobalt-factor-2 C20-methyltransferase [EC:2.1.1.130 2.1.1.151]	ec:2.1.1.130	K03394	---	---	0	0	0	0	0	0	0	1	0	0	0	0	0	1	1	0	0	0	0	0	1	1	0	0	0	0	0	0	0	1	0	0	0	0	0
	133	M00925	Cobalamin biosynthesis, aerobic, uroporphyrinogen III => precorrin 2 => cobyrinate a,c-diamide	map01240	Biosynthesis of cofactors	---	---	---	cobI-cbiL	precorrin-2/cobalt-factor-2 C20-methyltransferase [EC:2.1.1.130 2.1.1.151]	ec:2.1.1.151	K03394	---	---	0	0	0	0	0	0	0	1	0	0	0	0	0	1	1	0	0	0	0	0	1	1	0	0	0	0	0	0	0	1	0	0	0	0	0
	134	M00925	Cobalamin biosynthesis, aerobic, uroporphyrinogen III => precorrin 2 => cobyrinate a,c-diamide	map00860	Porphyrin and chlorophyll metabolism	---	---	---	cobF	precorrin-6A synthase [EC:2.1.1.152]	ec:2.1.1.152	K02228	---	---	0	0	0	0	0	0	0	0	0	0	0	0	0	1	1	0	0	0	0	0	1	1	0	0	1	0	0	0	0	1	0	0	0	0	0
	135	M00925	Cobalamin biosynthesis, aerobic, uroporphyrinogen III => precorrin 2 => cobyrinate a,c-diamide	map01100	Metabolic pathways	---	---	---	cobF	precorrin-6A synthase [EC:2.1.1.152]	ec:2.1.1.152	K02228	---	---	0	0	0	0	0	0	0	0	0	0	0	0	0	1	1	0	0	0	0	0	1	1	0	0	1	0	0	0	0	1	0	0	0	0	0
	136	M00925	Cobalamin biosynthesis, aerobic, uroporphyrinogen III => precorrin 2 => cobyrinate a,c-diamide	map01240	Biosynthesis of cofactors	---	---	---	cobF	precorrin-6A synthase [EC:2.1.1.152]	ec:2.1.1.152	K02228	---	---	0	0	0	0	0	0	0	0	0	0	0	0	0	1	1	0	0	0	0	0	1	1	0	0	1	0	0	0	0	1	0	0	0	0	0
	137	M00925	Cobalamin biosynthesis, aerobic, uroporphyrinogen III => precorrin 2 => cobyrinate a,c-diamide	map00860	Porphyrin and chlorophyll metabolism	---	---	---	cobL-cbiET	precorrin-6B C5,15-methyltransferase / cobalt-precorrin-6B C5,C15-methyltransferase [EC:2.1.1.132 2.1.1.289 2.1.1.196]	ec:2.1.1.132	K00595	---	---	0	0	0	0	0	0	0	0	0	0	0	0	0	1	1	0	0	0	0	0	1	1	0	0	1	0	0	0	0	1	0	0	0	0	0
	138	M00925	Cobalamin biosynthesis, aerobic, uroporphyrinogen III => precorrin 2 => cobyrinate a,c-diamide	map00860	Porphyrin and chlorophyll metabolism	---	---	---	cobL-cbiET	precorrin-6B C5,15-methyltransferase / cobalt-precorrin-6B C5,C15-methyltransferase [EC:2.1.1.132 2.1.1.289 2.1.1.196]	ec:2.1.1.289	K00595	---	---	0	0	0	0	0	0	0	0	0	0	0	0	0	1	1	0	0	0	0	0	1	1	0	0	1	0	0	0	0	1	0	0	0	0	0
	139	M00925	Cobalamin biosynthesis, aerobic, uroporphyrinogen III => precorrin 2 => cobyrinate a,c-diamide	map00860	Porphyrin and chlorophyll metabolism	---	---	---	cobL-cbiET	precorrin-6B C5,15-methyltransferase / cobalt-precorrin-6B C5,C15-methyltransferase [EC:2.1.1.132 2.1.1.289 2.1.1.196]	ec:2.1.1.196	K00595	---	---	0	0	0	0	0	0	0	0	0	0	0	0	0	1	1	0	0	0	0	0	1	1	0	0	1	0	0	0	0	1	0	0	0	0	0
	140	M00925	Cobalamin biosynthesis, aerobic, uroporphyrinogen III => precorrin 2 => cobyrinate a,c-diamide	map01100	Metabolic pathways	---	---	---	cobL-cbiET	precorrin-6B C5,15-methyltransferase / cobalt-precorrin-6B C5,C15-methyltransferase [EC:2.1.1.132 2.1.1.289 2.1.1.196]	ec:2.1.1.132	K00595	---	---	0	0	0	0	0	0	0	0	0	0	0	0	0	1	1	0	0	0	0	0	1	1	0	0	1	0	0	0	0	1	0	0	0	0	0
	141	M00925	Cobalamin biosynthesis, aerobic, uroporphyrinogen III => precorrin 2 => cobyrinate a,c-diamide	map01100	Metabolic pathways	---	---	---	cobL-cbiET	precorrin-6B C5,15-methyltransferase / cobalt-precorrin-6B C5,C15-methyltransferase [EC:2.1.1.132 2.1.1.289 2.1.1.196]	ec:2.1.1.289	K00595	---	---	0	0	0	0	0	0	0	0	0	0	0	0	0	1	1	0	0	0	0	0	1	1	0	0	1	0	0	0	0	1	0	0	0	0	0
	142	M00925	Cobalamin biosynthesis, aerobic, uroporphyrinogen III => precorrin 2 => cobyrinate a,c-diamide	map01100	Metabolic pathways	---	---	---	cobL-cbiET	precorrin-6B C5,15-methyltransferase / cobalt-precorrin-6B C5,C15-methyltransferase [EC:2.1.1.132 2.1.1.289 2.1.1.196]	ec:2.1.1.196	K00595	---	---	0	0	0	0	0	0	0	0	0	0	0	0	0	1	1	0	0	0	0	0	1	1	0	0	1	0	0	0	0	1	0	0	0	0	0
	143	M00925	Cobalamin biosynthesis, aerobic, uroporphyrinogen III => precorrin 2 => cobyrinate a,c-diamide	map01240	Biosynthesis of cofactors	---	---	---	cobL-cbiET	precorrin-6B C5,15-methyltransferase / cobalt-precorrin-6B C5,C15-methyltransferase [EC:2.1.1.132 2.1.1.289 2.1.1.196]	ec:2.1.1.132	K00595	---	---	0	0	0	0	0	0	0	0	0	0	0	0	0	1	1	0	0	0	0	0	1	1	0	0	1	0	0	0	0	1	0	0	0	0	0
	144	M00925	Cobalamin biosynthesis, aerobic, uroporphyrinogen III => precorrin 2 => cobyrinate a,c-diamide	map01240	Biosynthesis of cofactors	---	---	---	cobL-cbiET	precorrin-6B C5,15-methyltransferase / cobalt-precorrin-6B C5,C15-methyltransferase [EC:2.1.1.132 2.1.1.289 2.1.1.196]	ec:2.1.1.289	K00595	---	---	0	0	0	0	0	0	0	0	0	0	0	0	0	1	1	0	0	0	0	0	1	1	0	0	1	0	0	0	0	1	0	0	0	0	0
	145	M00925	Cobalamin biosynthesis, aerobic, uroporphyrinogen III => precorrin 2 => cobyrinate a,c-diamide	map01240	Biosynthesis of cofactors	---	---	---	cobL-cbiET	precorrin-6B C5,15-methyltransferase / cobalt-precorrin-6B C5,C15-methyltransferase [EC:2.1.1.132 2.1.1.289 2.1.1.196]	ec:2.1.1.196	K00595	---	---	0	0	0	0	0	0	0	0	0	0	0	0	0	1	1	0	0	0	0	0	1	1	0	0	1	0	0	0	0	1	0	0	0	0	0
	146	M00925	Cobalamin biosynthesis, aerobic, uroporphyrinogen III => precorrin 2 => cobyrinate a,c-diamide	map00860	Porphyrin and chlorophyll metabolism	---	---	---	cobH-cbiC	precorrin-8X/cobalt-precorrin-8 methylmutase [EC:5.4.99.61 5.4.99.60]	ec:5.4.99.61	K06042	---	---	0	0	0	0	0	0	0	0	0	0	0	0	0	1	1	0	0	0	0	0	1	1	0	0	0	0	0	0	0	1	0	0	0	0	0
	147	M00925	Cobalamin biosynthesis, aerobic, uroporphyrinogen III => precorrin 2 => cobyrinate a,c-diamide	map00860	Porphyrin and chlorophyll metabolism	---	---	---	cobH-cbiC	precorrin-8X/cobalt-precorrin-8 methylmutase [EC:5.4.99.61 5.4.99.60]	ec:5.4.99.60	K06042	---	---	0	0	0	0	0	0	0	0	0	0	0	0	0	1	1	0	0	0	0	0	1	1	0	0	0	0	0	0	0	1	0	0	0	0	0
	148	M00925	Cobalamin biosynthesis, aerobic, uroporphyrinogen III => precorrin 2 => cobyrinate a,c-diamide	map01100	Metabolic pathways	---	---	---	cobH-cbiC	precorrin-8X/cobalt-precorrin-8 methylmutase [EC:5.4.99.61 5.4.99.60]	ec:5.4.99.61	K06042	---	---	0	0	0	0	0	0	0	0	0	0	0	0	0	1	1	0	0	0	0	0	1	1	0	0	0	0	0	0	0	1	0	0	0	0	0
	149	M00925	Cobalamin biosynthesis, aerobic, uroporphyrinogen III => precorrin 2 => cobyrinate a,c-diamide	map01100	Metabolic pathways	---	---	---	cobH-cbiC	precorrin-8X/cobalt-precorrin-8 methylmutase [EC:5.4.99.61 5.4.99.60]	ec:5.4.99.60	K06042	---	---	0	0	0	0	0	0	0	0	0	0	0	0	0	1	1	0	0	0	0	0	1	1	0	0	0	0	0	0	0	1	0	0	0	0	0
	150	M00925	Cobalamin biosynthesis, aerobic, uroporphyrinogen III => precorrin 2 => cobyrinate a,c-diamide	map01240	Biosynthesis of cofactors	---	---	---	cobH-cbiC	precorrin-8X/cobalt-precorrin-8 methylmutase [EC:5.4.99.61 5.4.99.60]	ec:5.4.99.61	K06042	---	---	0	0	0	0	0	0	0	0	0	0	0	0	0	1	1	0	0	0	0	0	1	1	0	0	0	0	0	0	0	1	0	0	0	0	0
	151	M00925	Cobalamin biosynthesis, aerobic, uroporphyrinogen III => precorrin 2 => cobyrinate a,c-diamide	map01240	Biosynthesis of cofactors	---	---	---	cobH-cbiC	precorrin-8X/cobalt-precorrin-8 methylmutase [EC:5.4.99.61 5.4.99.60]	ec:5.4.99.60	K06042	---	---	0	0	0	0	0	0	0	0	0	0	0	0	0	1	1	0	0	0	0	0	1	1	0	0	0	0	0	0	0	1	0	0	0	0	0
	152	M00925	Cobalamin biosynthesis, aerobic, uroporphyrinogen III => precorrin 2 => cobyrinate a,c-diamide	map00860	Porphyrin and chlorophyll metabolism	---	---	---	cobG	precorrin-3B synthase [EC:1.14.13.83]	ec:1.14.13.83	K02229	---	---	0	0	0	0	0	0	0	0	0	0	0	0	0	1	1	0	0	0	0	0	1	1	0	0	1	0	0	0	0	1	0	0	0	0	0
	153	M00925	Cobalamin biosynthesis, aerobic, uroporphyrinogen III => precorrin 2 => cobyrinate a,c-diamide	map01100	Metabolic pathways	---	---	---	cobG	precorrin-3B synthase [EC:1.14.13.83]	ec:1.14.13.83	K02229	---	---	0	0	0	0	0	0	0	0	0	0	0	0	0	1	1	0	0	0	0	0	1	1	0	0	1	0	0	0	0	1	0	0	0	0	0
	154	M00925	Cobalamin biosynthesis, aerobic, uroporphyrinogen III => precorrin 2 => cobyrinate a,c-diamide	map01240	Biosynthesis of cofactors	---	---	---	cobG	precorrin-3B synthase [EC:1.14.13.83]	ec:1.14.13.83	K02229	---	---	0	0	0	0	0	0	0	0	0	0	0	0	0	1	1	0	0	0	0	0	1	1	0	0	1	0	0	0	0	1	0	0	0	0	0
	155	M00924	Cobalamin biosynthesis, anaerobic, uroporphyrinogen III => sirohydrochlorin => cobyrinate a,c-diamide	map00860	Porphyrin and chlorophyll metabolism	---	---	---	cysG	uroporphyrin-III C-methyltransferase / precorrin-2 dehydrogenase / sirohydrochlorin ferrochelatase [EC:2.1.1.107 1.3.1.76 4.99.1.4]	ec:2.1.1.107	K02302	---	---	1	0	1	1	1	0	1	0	1	0	1	1	1	0	2	0	1	0	0	1	2	0	1	1	0	0	1	0	1	0	1	1	0	0	0
	156	M00924	Cobalamin biosynthesis, anaerobic, uroporphyrinogen III => sirohydrochlorin => cobyrinate a,c-diamide	map00860	Porphyrin and chlorophyll metabolism	---	---	---	cysG	uroporphyrin-III C-methyltransferase / precorrin-2 dehydrogenase / sirohydrochlorin ferrochelatase [EC:2.1.1.107 1.3.1.76 4.99.1.4]	ec:1.3.1.76	K02302	---	---	1	0	1	1	1	0	1	0	1	0	1	1	1	0	2	0	1	0	0	1	2	0	1	1	0	0	1	0	1	0	1	1	0	0	0
	157	M00924	Cobalamin biosynthesis, anaerobic, uroporphyrinogen III => sirohydrochlorin => cobyrinate a,c-diamide	map00860	Porphyrin and chlorophyll metabolism	---	---	---	cysG	uroporphyrin-III C-methyltransferase / precorrin-2 dehydrogenase / sirohydrochlorin ferrochelatase [EC:2.1.1.107 1.3.1.76 4.99.1.4]	ec:4.99.1.4	K02302	---	---	1	0	1	1	1	0	1	0	1	0	1	1	1	0	2	0	1	0	0	1	2	0	1	1	0	0	1	0	1	0	1	1	0	0	0
	158	M00924	Cobalamin biosynthesis, anaerobic, uroporphyrinogen III => sirohydrochlorin => cobyrinate a,c-diamide	map01100	Metabolic pathways	---	---	---	cysG	uroporphyrin-III C-methyltransferase / precorrin-2 dehydrogenase / sirohydrochlorin ferrochelatase [EC:2.1.1.107 1.3.1.76 4.99.1.4]	ec:2.1.1.107	K02302	---	---	1	0	1	1	1	0	1	0	1	0	1	1	1	0	2	0	1	0	0	1	2	0	1	1	0	0	1	0	1	0	1	1	0	0	0
	159	M00924	Cobalamin biosynthesis, anaerobic, uroporphyrinogen III => sirohydrochlorin => cobyrinate a,c-diamide	map01100	Metabolic pathways	---	---	---	cysG	uroporphyrin-III C-methyltransferase / precorrin-2 dehydrogenase / sirohydrochlorin ferrochelatase [EC:2.1.1.107 1.3.1.76 4.99.1.4]	ec:1.3.1.76	K02302	---	---	1	0	1	1	1	0	1	0	1	0	1	1	1	0	2	0	1	0	0	1	2	0	1	1	0	0	1	0	1	0	1	1	0	0	0
	160	M00924	Cobalamin biosynthesis, anaerobic, uroporphyrinogen III => sirohydrochlorin => cobyrinate a,c-diamide	map01100	Metabolic pathways	---	---	---	cysG	uroporphyrin-III C-methyltransferase / precorrin-2 dehydrogenase / sirohydrochlorin ferrochelatase [EC:2.1.1.107 1.3.1.76 4.99.1.4]	ec:4.99.1.4	K02302	---	---	1	0	1	1	1	0	1	0	1	0	1	1	1	0	2	0	1	0	0	1	2	0	1	1	0	0	1	0	1	0	1	1	0	0	0
	161	M00924	Cobalamin biosynthesis, anaerobic, uroporphyrinogen III => sirohydrochlorin => cobyrinate a,c-diamide	map01110	Biosynthesis of secondary metabolites	---	---	---	cysG	uroporphyrin-III C-methyltransferase / precorrin-2 dehydrogenase / sirohydrochlorin ferrochelatase [EC:2.1.1.107 1.3.1.76 4.99.1.4]	ec:2.1.1.107	K02302	---	---	1	0	1	1	1	0	1	0	1	0	1	1	1	0	2	0	1	0	0	1	2	0	1	1	0	0	1	0	1	0	1	1	0	0	0
	162	M00924	Cobalamin biosynthesis, anaerobic, uroporphyrinogen III => sirohydrochlorin => cobyrinate a,c-diamide	map01110	Biosynthesis of secondary metabolites	---	---	---	cysG	uroporphyrin-III C-methyltransferase / precorrin-2 dehydrogenase / sirohydrochlorin ferrochelatase [EC:2.1.1.107 1.3.1.76 4.99.1.4]	ec:1.3.1.76	K02302	---	---	1	0	1	1	1	0	1	0	1	0	1	1	1	0	2	0	1	0	0	1	2	0	1	1	0	0	1	0	1	0	1	1	0	0	0
	163	M00924	Cobalamin biosynthesis, anaerobic, uroporphyrinogen III => sirohydrochlorin => cobyrinate a,c-diamide	map01110	Biosynthesis of secondary metabolites	---	---	---	cysG	uroporphyrin-III C-methyltransferase / precorrin-2 dehydrogenase / sirohydrochlorin ferrochelatase [EC:2.1.1.107 1.3.1.76 4.99.1.4]	ec:4.99.1.4	K02302	---	---	1	0	1	1	1	0	1	0	1	0	1	1	1	0	2	0	1	0	0	1	2	0	1	1	0	0	1	0	1	0	1	1	0	0	0
	164	M00924	Cobalamin biosynthesis, anaerobic, uroporphyrinogen III => sirohydrochlorin => cobyrinate a,c-diamide	map01120	Microbial metabolism in diverse environments	---	---	---	cysG	uroporphyrin-III C-methyltransferase / precorrin-2 dehydrogenase / sirohydrochlorin ferrochelatase [EC:2.1.1.107 1.3.1.76 4.99.1.4]	ec:2.1.1.107	K02302	---	---	1	0	1	1	1	0	1	0	1	0	1	1	1	0	2	0	1	0	0	1	2	0	1	1	0	0	1	0	1	0	1	1	0	0	0
	165	M00924	Cobalamin biosynthesis, anaerobic, uroporphyrinogen III => sirohydrochlorin => cobyrinate a,c-diamide	map01120	Microbial metabolism in diverse environments	---	---	---	cysG	uroporphyrin-III C-methyltransferase / precorrin-2 dehydrogenase / sirohydrochlorin ferrochelatase [EC:2.1.1.107 1.3.1.76 4.99.1.4]	ec:1.3.1.76	K02302	---	---	1	0	1	1	1	0	1	0	1	0	1	1	1	0	2	0	1	0	0	1	2	0	1	1	0	0	1	0	1	0	1	1	0	0	0
	166	M00924	Cobalamin biosynthesis, anaerobic, uroporphyrinogen III => sirohydrochlorin => cobyrinate a,c-diamide	map01120	Microbial metabolism in diverse environments	---	---	---	cysG	uroporphyrin-III C-methyltransferase / precorrin-2 dehydrogenase / sirohydrochlorin ferrochelatase [EC:2.1.1.107 1.3.1.76 4.99.1.4]	ec:4.99.1.4	K02302	---	---	1	0	1	1	1	0	1	0	1	0	1	1	1	0	2	0	1	0	0	1	2	0	1	1	0	0	1	0	1	0	1	1	0	0	0
	167	M00924	Cobalamin biosynthesis, anaerobic, uroporphyrinogen III => sirohydrochlorin => cobyrinate a,c-diamide	map01240	Biosynthesis of cofactors	---	---	---	cysG	uroporphyrin-III C-methyltransferase / precorrin-2 dehydrogenase / sirohydrochlorin ferrochelatase [EC:2.1.1.107 1.3.1.76 4.99.1.4]	ec:2.1.1.107	K02302	---	---	1	0	1	1	1	0	1	0	1	0	1	1	1	0	2	0	1	0	0	1	2	0	1	1	0	0	1	0	1	0	1	1	0	0	0
	168	M00924	Cobalamin biosynthesis, anaerobic, uroporphyrinogen III => sirohydrochlorin => cobyrinate a,c-diamide	map01240	Biosynthesis of cofactors	---	---	---	cysG	uroporphyrin-III C-methyltransferase / precorrin-2 dehydrogenase / sirohydrochlorin ferrochelatase [EC:2.1.1.107 1.3.1.76 4.99.1.4]	ec:1.3.1.76	K02302	---	---	1	0	1	1	1	0	1	0	1	0	1	1	1	0	2	0	1	0	0	1	2	0	1	1	0	0	1	0	1	0	1	1	0	0	0
	169	M00924	Cobalamin biosynthesis, anaerobic, uroporphyrinogen III => sirohydrochlorin => cobyrinate a,c-diamide	map01240	Biosynthesis of cofactors	---	---	---	cysG	uroporphyrin-III C-methyltransferase / precorrin-2 dehydrogenase / sirohydrochlorin ferrochelatase [EC:2.1.1.107 1.3.1.76 4.99.1.4]	ec:4.99.1.4	K02302	---	---	1	0	1	1	1	0	1	0	1	0	1	1	1	0	2	0	1	0	0	1	2	0	1	1	0	0	1	0	1	0	1	1	0	0	0
	170	M00924	Cobalamin biosynthesis, anaerobic, uroporphyrinogen III => sirohydrochlorin => cobyrinate a,c-diamide	map00860	Porphyrin and chlorophyll metabolism	---	---	---	cobA	uroporphyrin-III C-methyltransferase [EC:2.1.1.107]	ec:2.1.1.107	K02303	---	---	1	1	1	1	1	1	2	0	1	0	1	2	1	3	3	1	1	1	0	1	3	3	2	1	0	0	2	0	2	1	1	2	1	2	2
	171	M00924	Cobalamin biosynthesis, anaerobic, uroporphyrinogen III => sirohydrochlorin => cobyrinate a,c-diamide	map01100	Metabolic pathways	---	---	---	cobA	uroporphyrin-III C-methyltransferase [EC:2.1.1.107]	ec:2.1.1.107	K02303	---	---	1	1	1	1	1	1	2	0	1	0	1	2	1	3	3	1	1	1	0	1	3	3	2	1	0	0	2	0	2	1	1	2	1	2	2
	172	M00924	Cobalamin biosynthesis, anaerobic, uroporphyrinogen III => sirohydrochlorin => cobyrinate a,c-diamide	map01110	Biosynthesis of secondary metabolites	---	---	---	cobA	uroporphyrin-III C-methyltransferase [EC:2.1.1.107]	ec:2.1.1.107	K02303	---	---	1	1	1	1	1	1	2	0	1	0	1	2	1	3	3	1	1	1	0	1	3	3	2	1	0	0	2	0	2	1	1	2	1	2	2
	173	M00924	Cobalamin biosynthesis, anaerobic, uroporphyrinogen III => sirohydrochlorin => cobyrinate a,c-diamide	map01120	Microbial metabolism in diverse environments	---	---	---	cobA	uroporphyrin-III C-methyltransferase [EC:2.1.1.107]	ec:2.1.1.107	K02303	---	---	1	1	1	1	1	1	2	0	1	0	1	2	1	3	3	1	1	1	0	1	3	3	2	1	0	0	2	0	2	1	1	2	1	2	2
	174	M00924	Cobalamin biosynthesis, anaerobic, uroporphyrinogen III => sirohydrochlorin => cobyrinate a,c-diamide	map01240	Biosynthesis of cofactors	---	---	---	cobA	uroporphyrin-III C-methyltransferase [EC:2.1.1.107]	ec:2.1.1.107	K02303	---	---	1	1	1	1	1	1	2	0	1	0	1	2	1	3	3	1	1	1	0	1	3	3	2	1	0	0	2	0	2	1	1	2	1	2	2
	175	M00924	Cobalamin biosynthesis, anaerobic, uroporphyrinogen III => sirohydrochlorin => cobyrinate a,c-diamide	map00860	Porphyrin and chlorophyll metabolism	---	---	---	MET8	precorrin-2 dehydrogenase / sirohydrochlorin ferrochelatase [EC:1.3.1.76 4.99.1.4]	ec:1.3.1.76	K02304	---	---	1	0	1	1	0	0	1	0	1	0	1	1	1	0	2	0	1	0	0	1	2	0	1	1	0	0	1	0	1	0	1	1	0	0	0
	176	M00924	Cobalamin biosynthesis, anaerobic, uroporphyrinogen III => sirohydrochlorin => cobyrinate a,c-diamide	map00860	Porphyrin and chlorophyll metabolism	---	---	---	MET8	precorrin-2 dehydrogenase / sirohydrochlorin ferrochelatase [EC:1.3.1.76 4.99.1.4]	ec:4.99.1.4	K02304	---	---	1	0	1	1	0	0	1	0	1	0	1	1	1	0	2	0	1	0	0	1	2	0	1	1	0	0	1	0	1	0	1	1	0	0	0
	177	M00924	Cobalamin biosynthesis, anaerobic, uroporphyrinogen III => sirohydrochlorin => cobyrinate a,c-diamide	map01100	Metabolic pathways	---	---	---	MET8	precorrin-2 dehydrogenase / sirohydrochlorin ferrochelatase [EC:1.3.1.76 4.99.1.4]	ec:1.3.1.76	K02304	---	---	1	0	1	1	0	0	1	0	1	0	1	1	1	0	2	0	1	0	0	1	2	0	1	1	0	0	1	0	1	0	1	1	0	0	0
	178	M00924	Cobalamin biosynthesis, anaerobic, uroporphyrinogen III => sirohydrochlorin => cobyrinate a,c-diamide	map01100	Metabolic pathways	---	---	---	MET8	precorrin-2 dehydrogenase / sirohydrochlorin ferrochelatase [EC:1.3.1.76 4.99.1.4]	ec:4.99.1.4	K02304	---	---	1	0	1	1	0	0	1	0	1	0	1	1	1	0	2	0	1	0	0	1	2	0	1	1	0	0	1	0	1	0	1	1	0	0	0
	179	M00924	Cobalamin biosynthesis, anaerobic, uroporphyrinogen III => sirohydrochlorin => cobyrinate a,c-diamide	map01110	Biosynthesis of secondary metabolites	---	---	---	MET8	precorrin-2 dehydrogenase / sirohydrochlorin ferrochelatase [EC:1.3.1.76 4.99.1.4]	ec:1.3.1.76	K02304	---	---	1	0	1	1	0	0	1	0	1	0	1	1	1	0	2	0	1	0	0	1	2	0	1	1	0	0	1	0	1	0	1	1	0	0	0
	180	M00924	Cobalamin biosynthesis, anaerobic, uroporphyrinogen III => sirohydrochlorin => cobyrinate a,c-diamide	map01110	Biosynthesis of secondary metabolites	---	---	---	MET8	precorrin-2 dehydrogenase / sirohydrochlorin ferrochelatase [EC:1.3.1.76 4.99.1.4]	ec:4.99.1.4	K02304	---	---	1	0	1	1	0	0	1	0	1	0	1	1	1	0	2	0	1	0	0	1	2	0	1	1	0	0	1	0	1	0	1	1	0	0	0
	181	M00924	Cobalamin biosynthesis, anaerobic, uroporphyrinogen III => sirohydrochlorin => cobyrinate a,c-diamide	map01120	Microbial metabolism in diverse environments	---	---	---	MET8	precorrin-2 dehydrogenase / sirohydrochlorin ferrochelatase [EC:1.3.1.76 4.99.1.4]	ec:1.3.1.76	K02304	---	---	1	0	1	1	0	0	1	0	1	0	1	1	1	0	2	0	1	0	0	1	2	0	1	1	0	0	1	0	1	0	1	1	0	0	0
	182	M00924	Cobalamin biosynthesis, anaerobic, uroporphyrinogen III => sirohydrochlorin => cobyrinate a,c-diamide	map01120	Microbial metabolism in diverse environments	---	---	---	MET8	precorrin-2 dehydrogenase / sirohydrochlorin ferrochelatase [EC:1.3.1.76 4.99.1.4]	ec:4.99.1.4	K02304	---	---	1	0	1	1	0	0	1	0	1	0	1	1	1	0	2	0	1	0	0	1	2	0	1	1	0	0	1	0	1	0	1	1	0	0	0
	183	M00924	Cobalamin biosynthesis, anaerobic, uroporphyrinogen III => sirohydrochlorin => cobyrinate a,c-diamide	map01240	Biosynthesis of cofactors	---	---	---	MET8	precorrin-2 dehydrogenase / sirohydrochlorin ferrochelatase [EC:1.3.1.76 4.99.1.4]	ec:1.3.1.76	K02304	---	---	1	0	1	1	0	0	1	0	1	0	1	1	1	0	2	0	1	0	0	1	2	0	1	1	0	0	1	0	1	0	1	1	0	0	0
	184	M00924	Cobalamin biosynthesis, anaerobic, uroporphyrinogen III => sirohydrochlorin => cobyrinate a,c-diamide	map01240	Biosynthesis of cofactors	---	---	---	MET8	precorrin-2 dehydrogenase / sirohydrochlorin ferrochelatase [EC:1.3.1.76 4.99.1.4]	ec:4.99.1.4	K02304	---	---	1	0	1	1	0	0	1	0	1	0	1	1	1	0	2	0	1	0	0	1	2	0	1	1	0	0	1	0	1	0	1	1	0	0	0
	185	M00924	Cobalamin biosynthesis, anaerobic, uroporphyrinogen III => sirohydrochlorin => cobyrinate a,c-diamide	map00860	Porphyrin and chlorophyll metabolism	---	---	---	cobB-cbiA	cobyrinic acid a,c-diamide synthase [EC:6.3.5.9 6.3.5.11]	ec:6.3.5.9	K02224	---	---	0	1	0	0	0	0	0	1	1	0	0	0	0	1	1	0	0	1	0	1	1	1	0	0	1	0	0	0	0	1	1	0	1	0	0
	186	M00924	Cobalamin biosynthesis, anaerobic, uroporphyrinogen III => sirohydrochlorin => cobyrinate a,c-diamide	map00860	Porphyrin and chlorophyll metabolism	---	---	---	cobB-cbiA	cobyrinic acid a,c-diamide synthase [EC:6.3.5.9 6.3.5.11]	ec:6.3.5.11	K02224	---	---	0	1	0	0	0	0	0	1	1	0	0	0	0	1	1	0	0	1	0	1	1	1	0	0	1	0	0	0	0	1	1	0	1	0	0
	187	M00924	Cobalamin biosynthesis, anaerobic, uroporphyrinogen III => sirohydrochlorin => cobyrinate a,c-diamide	map01100	Metabolic pathways	---	---	---	cobB-cbiA	cobyrinic acid a,c-diamide synthase [EC:6.3.5.9 6.3.5.11]	ec:6.3.5.9	K02224	---	---	0	1	0	0	0	0	0	1	1	0	0	0	0	1	1	0	0	1	0	1	1	1	0	0	1	0	0	0	0	1	1	0	1	0	0
	188	M00924	Cobalamin biosynthesis, anaerobic, uroporphyrinogen III => sirohydrochlorin => cobyrinate a,c-diamide	map01100	Metabolic pathways	---	---	---	cobB-cbiA	cobyrinic acid a,c-diamide synthase [EC:6.3.5.9 6.3.5.11]	ec:6.3.5.11	K02224	---	---	0	1	0	0	0	0	0	1	1	0	0	0	0	1	1	0	0	1	0	1	1	1	0	0	1	0	0	0	0	1	1	0	1	0	0
	189	M00924	Cobalamin biosynthesis, anaerobic, uroporphyrinogen III => sirohydrochlorin => cobyrinate a,c-diamide	map01240	Biosynthesis of cofactors	---	---	---	cobB-cbiA	cobyrinic acid a,c-diamide synthase [EC:6.3.5.9 6.3.5.11]	ec:6.3.5.9	K02224	---	---	0	1	0	0	0	0	0	1	1	0	0	0	0	1	1	0	0	1	0	1	1	1	0	0	1	0	0	0	0	1	1	0	1	0	0
	190	M00924	Cobalamin biosynthesis, anaerobic, uroporphyrinogen III => sirohydrochlorin => cobyrinate a,c-diamide	map01240	Biosynthesis of cofactors	---	---	---	cobB-cbiA	cobyrinic acid a,c-diamide synthase [EC:6.3.5.9 6.3.5.11]	ec:6.3.5.11	K02224	---	---	0	1	0	0	0	0	0	1	1	0	0	0	0	1	1	0	0	1	0	1	1	1	0	0	1	0	0	0	0	1	1	0	1	0	0
	191	M00924	Cobalamin biosynthesis, anaerobic, uroporphyrinogen III => sirohydrochlorin => cobyrinate a,c-diamide	map00860	Porphyrin and chlorophyll metabolism	---	---	---	cobK-cbiJ	precorrin-6A/cobalt-precorrin-6A reductase [EC:1.3.1.54 1.3.1.106]	ec:1.3.1.54	K05895	---	---	0	0	0	1	0	0	0	0	0	0	0	0	0	1	1	0	0	0	0	0	1	1	0	1	1	0	0	0	0	1	0	0	0	0	0
	192	M00924	Cobalamin biosynthesis, anaerobic, uroporphyrinogen III => sirohydrochlorin => cobyrinate a,c-diamide	map00860	Porphyrin and chlorophyll metabolism	---	---	---	cobK-cbiJ	precorrin-6A/cobalt-precorrin-6A reductase [EC:1.3.1.54 1.3.1.106]	ec:1.3.1.106	K05895	---	---	0	0	0	1	0	0	0	0	0	0	0	0	0	1	1	0	0	0	0	0	1	1	0	1	1	0	0	0	0	1	0	0	0	0	0
	193	M00924	Cobalamin biosynthesis, anaerobic, uroporphyrinogen III => sirohydrochlorin => cobyrinate a,c-diamide	map01100	Metabolic pathways	---	---	---	cobK-cbiJ	precorrin-6A/cobalt-precorrin-6A reductase [EC:1.3.1.54 1.3.1.106]	ec:1.3.1.54	K05895	---	---	0	0	0	1	0	0	0	0	0	0	0	0	0	1	1	0	0	0	0	0	1	1	0	1	1	0	0	0	0	1	0	0	0	0	0
	194	M00924	Cobalamin biosynthesis, anaerobic, uroporphyrinogen III => sirohydrochlorin => cobyrinate a,c-diamide	map01100	Metabolic pathways	---	---	---	cobK-cbiJ	precorrin-6A/cobalt-precorrin-6A reductase [EC:1.3.1.54 1.3.1.106]	ec:1.3.1.106	K05895	---	---	0	0	0	1	0	0	0	0	0	0	0	0	0	1	1	0	0	0	0	0	1	1	0	1	1	0	0	0	0	1	0	0	0	0	0
	195	M00924	Cobalamin biosynthesis, anaerobic, uroporphyrinogen III => sirohydrochlorin => cobyrinate a,c-diamide	map01240	Biosynthesis of cofactors	---	---	---	cobK-cbiJ	precorrin-6A/cobalt-precorrin-6A reductase [EC:1.3.1.54 1.3.1.106]	ec:1.3.1.54	K05895	---	---	0	0	0	1	0	0	0	0	0	0	0	0	0	1	1	0	0	0	0	0	1	1	0	1	1	0	0	0	0	1	0	0	0	0	0
	196	M00924	Cobalamin biosynthesis, anaerobic, uroporphyrinogen III => sirohydrochlorin => cobyrinate a,c-diamide	map01240	Biosynthesis of cofactors	---	---	---	cobK-cbiJ	precorrin-6A/cobalt-precorrin-6A reductase [EC:1.3.1.54 1.3.1.106]	ec:1.3.1.106	K05895	---	---	0	0	0	1	0	0	0	0	0	0	0	0	0	1	1	0	0	0	0	0	1	1	0	1	1	0	0	0	0	1	0	0	0	0	0
	197	M00924	Cobalamin biosynthesis, anaerobic, uroporphyrinogen III => sirohydrochlorin => cobyrinate a,c-diamide	map00860	Porphyrin and chlorophyll metabolism	---	---	---	cobM, cbiF	precorrin-4/cobalt-precorrin-4 C11-methyltransferase [EC:2.1.1.133 2.1.1.271]	ec:2.1.1.133	K05936	---	---	0	0	0	0	0	0	0	1	0	0	0	0	0	1	1	0	0	0	0	0	1	1	0	0	1	0	0	0	0	1	0	0	0	0	0
	198	M00924	Cobalamin biosynthesis, anaerobic, uroporphyrinogen III => sirohydrochlorin => cobyrinate a,c-diamide	map00860	Porphyrin and chlorophyll metabolism	---	---	---	cobM, cbiF	precorrin-4/cobalt-precorrin-4 C11-methyltransferase [EC:2.1.1.133 2.1.1.271]	ec:2.1.1.271	K05936	---	---	0	0	0	0	0	0	0	1	0	0	0	0	0	1	1	0	0	0	0	0	1	1	0	0	1	0	0	0	0	1	0	0	0	0	0
	199	M00924	Cobalamin biosynthesis, anaerobic, uroporphyrinogen III => sirohydrochlorin => cobyrinate a,c-diamide	map01100	Metabolic pathways	---	---	---	cobM, cbiF	precorrin-4/cobalt-precorrin-4 C11-methyltransferase [EC:2.1.1.133 2.1.1.271]	ec:2.1.1.133	K05936	---	---	0	0	0	0	0	0	0	1	0	0	0	0	0	1	1	0	0	0	0	0	1	1	0	0	1	0	0	0	0	1	0	0	0	0	0
	200	M00924	Cobalamin biosynthesis, anaerobic, uroporphyrinogen III => sirohydrochlorin => cobyrinate a,c-diamide	map01100	Metabolic pathways	---	---	---	cobM, cbiF	precorrin-4/cobalt-precorrin-4 C11-methyltransferase [EC:2.1.1.133 2.1.1.271]	ec:2.1.1.271	K05936	---	---	0	0	0	0	0	0	0	1	0	0	0	0	0	1	1	0	0	0	0	0	1	1	0	0	1	0	0	0	0	1	0	0	0	0	0
	201	M00924	Cobalamin biosynthesis, anaerobic, uroporphyrinogen III => sirohydrochlorin => cobyrinate a,c-diamide	map01240	Biosynthesis of cofactors	---	---	---	cobM, cbiF	precorrin-4/cobalt-precorrin-4 C11-methyltransferase [EC:2.1.1.133 2.1.1.271]	ec:2.1.1.133	K05936	---	---	0	0	0	0	0	0	0	1	0	0	0	0	0	1	1	0	0	0	0	0	1	1	0	0	1	0	0	0	0	1	0	0	0	0	0
	202	M00924	Cobalamin biosynthesis, anaerobic, uroporphyrinogen III => sirohydrochlorin => cobyrinate a,c-diamide	map01240	Biosynthesis of cofactors	---	---	---	cobM, cbiF	precorrin-4/cobalt-precorrin-4 C11-methyltransferase [EC:2.1.1.133 2.1.1.271]	ec:2.1.1.271	K05936	---	---	0	0	0	0	0	0	0	1	0	0	0	0	0	1	1	0	0	0	0	0	1	1	0	0	1	0	0	0	0	1	0	0	0	0	0
	203	M00924	Cobalamin biosynthesis, anaerobic, uroporphyrinogen III => sirohydrochlorin => cobyrinate a,c-diamide	map00860	Porphyrin and chlorophyll metabolism	---	---	---	cbiG	cobalt-precorrin 5A hydrolase [EC:3.7.1.12]	ec:3.7.1.12	K02189	---	---	0	0	0	0	0	0	0	1	0	0	0	0	0	0	0	0	0	0	0	0	0	0	0	0	0	0	0	0	0	0	0	0	0	0	0
	204	M00924	Cobalamin biosynthesis, anaerobic, uroporphyrinogen III => sirohydrochlorin => cobyrinate a,c-diamide	map01100	Metabolic pathways	---	---	---	cbiG	cobalt-precorrin 5A hydrolase [EC:3.7.1.12]	ec:3.7.1.12	K02189	---	---	0	0	0	0	0	0	0	1	0	0	0	0	0	0	0	0	0	0	0	0	0	0	0	0	0	0	0	0	0	0	0	0	0	0	0
	205	M00924	Cobalamin biosynthesis, anaerobic, uroporphyrinogen III => sirohydrochlorin => cobyrinate a,c-diamide	map01240	Biosynthesis of cofactors	---	---	---	cbiG	cobalt-precorrin 5A hydrolase [EC:3.7.1.12]	ec:3.7.1.12	K02189	---	---	0	0	0	0	0	0	0	1	0	0	0	0	0	0	0	0	0	0	0	0	0	0	0	0	0	0	0	0	0	0	0	0	0	0	0
	206	M00924	Cobalamin biosynthesis, anaerobic, uroporphyrinogen III => sirohydrochlorin => cobyrinate a,c-diamide	map00860	Porphyrin and chlorophyll metabolism	---	---	---	cobI-cbiL	precorrin-2/cobalt-factor-2 C20-methyltransferase [EC:2.1.1.130 2.1.1.151]	ec:2.1.1.130	K03394	---	---	0	0	0	0	0	0	0	1	0	0	0	0	0	1	1	0	0	0	0	0	1	1	0	0	0	0	0	0	0	1	0	0	0	0	0
	207	M00924	Cobalamin biosynthesis, anaerobic, uroporphyrinogen III => sirohydrochlorin => cobyrinate a,c-diamide	map00860	Porphyrin and chlorophyll metabolism	---	---	---	cobI-cbiL	precorrin-2/cobalt-factor-2 C20-methyltransferase [EC:2.1.1.130 2.1.1.151]	ec:2.1.1.151	K03394	---	---	0	0	0	0	0	0	0	1	0	0	0	0	0	1	1	0	0	0	0	0	1	1	0	0	0	0	0	0	0	1	0	0	0	0	0
	208	M00924	Cobalamin biosynthesis, anaerobic, uroporphyrinogen III => sirohydrochlorin => cobyrinate a,c-diamide	map01100	Metabolic pathways	---	---	---	cobI-cbiL	precorrin-2/cobalt-factor-2 C20-methyltransferase [EC:2.1.1.130 2.1.1.151]	ec:2.1.1.130	K03394	---	---	0	0	0	0	0	0	0	1	0	0	0	0	0	1	1	0	0	0	0	0	1	1	0	0	0	0	0	0	0	1	0	0	0	0	0
	209	M00924	Cobalamin biosynthesis, anaerobic, uroporphyrinogen III => sirohydrochlorin => cobyrinate a,c-diamide	map01100	Metabolic pathways	---	---	---	cobI-cbiL	precorrin-2/cobalt-factor-2 C20-methyltransferase [EC:2.1.1.130 2.1.1.151]	ec:2.1.1.151	K03394	---	---	0	0	0	0	0	0	0	1	0	0	0	0	0	1	1	0	0	0	0	0	1	1	0	0	0	0	0	0	0	1	0	0	0	0	0
	210	M00924	Cobalamin biosynthesis, anaerobic, uroporphyrinogen III => sirohydrochlorin => cobyrinate a,c-diamide	map01240	Biosynthesis of cofactors	---	---	---	cobI-cbiL	precorrin-2/cobalt-factor-2 C20-methyltransferase [EC:2.1.1.130 2.1.1.151]	ec:2.1.1.130	K03394	---	---	0	0	0	0	0	0	0	1	0	0	0	0	0	1	1	0	0	0	0	0	1	1	0	0	0	0	0	0	0	1	0	0	0	0	0
	211	M00924	Cobalamin biosynthesis, anaerobic, uroporphyrinogen III => sirohydrochlorin => cobyrinate a,c-diamide	map01240	Biosynthesis of cofactors	---	---	---	cobI-cbiL	precorrin-2/cobalt-factor-2 C20-methyltransferase [EC:2.1.1.130 2.1.1.151]	ec:2.1.1.151	K03394	---	---	0	0	0	0	0	0	0	1	0	0	0	0	0	1	1	0	0	0	0	0	1	1	0	0	0	0	0	0	0	1	0	0	0	0	0
	212	M00924	Cobalamin biosynthesis, anaerobic, uroporphyrinogen III => sirohydrochlorin => cobyrinate a,c-diamide	map00860	Porphyrin and chlorophyll metabolism	---	---	---	cobL-cbiET	precorrin-6B C5,15-methyltransferase / cobalt-precorrin-6B C5,C15-methyltransferase [EC:2.1.1.132 2.1.1.289 2.1.1.196]	ec:2.1.1.132	K00595	---	---	0	0	0	0	0	0	0	0	0	0	0	0	0	1	1	0	0	0	0	0	1	1	0	0	1	0	0	0	0	1	0	0	0	0	0
	213	M00924	Cobalamin biosynthesis, anaerobic, uroporphyrinogen III => sirohydrochlorin => cobyrinate a,c-diamide	map00860	Porphyrin and chlorophyll metabolism	---	---	---	cobL-cbiET	precorrin-6B C5,15-methyltransferase / cobalt-precorrin-6B C5,C15-methyltransferase [EC:2.1.1.132 2.1.1.289 2.1.1.196]	ec:2.1.1.289	K00595	---	---	0	0	0	0	0	0	0	0	0	0	0	0	0	1	1	0	0	0	0	0	1	1	0	0	1	0	0	0	0	1	0	0	0	0	0
	214	M00924	Cobalamin biosynthesis, anaerobic, uroporphyrinogen III => sirohydrochlorin => cobyrinate a,c-diamide	map00860	Porphyrin and chlorophyll metabolism	---	---	---	cobL-cbiET	precorrin-6B C5,15-methyltransferase / cobalt-precorrin-6B C5,C15-methyltransferase [EC:2.1.1.132 2.1.1.289 2.1.1.196]	ec:2.1.1.196	K00595	---	---	0	0	0	0	0	0	0	0	0	0	0	0	0	1	1	0	0	0	0	0	1	1	0	0	1	0	0	0	0	1	0	0	0	0	0
	215	M00924	Cobalamin biosynthesis, anaerobic, uroporphyrinogen III => sirohydrochlorin => cobyrinate a,c-diamide	map01100	Metabolic pathways	---	---	---	cobL-cbiET	precorrin-6B C5,15-methyltransferase / cobalt-precorrin-6B C5,C15-methyltransferase [EC:2.1.1.132 2.1.1.289 2.1.1.196]	ec:2.1.1.132	K00595	---	---	0	0	0	0	0	0	0	0	0	0	0	0	0	1	1	0	0	0	0	0	1	1	0	0	1	0	0	0	0	1	0	0	0	0	0
	216	M00924	Cobalamin biosynthesis, anaerobic, uroporphyrinogen III => sirohydrochlorin => cobyrinate a,c-diamide	map01100	Metabolic pathways	---	---	---	cobL-cbiET	precorrin-6B C5,15-methyltransferase / cobalt-precorrin-6B C5,C15-methyltransferase [EC:2.1.1.132 2.1.1.289 2.1.1.196]	ec:2.1.1.289	K00595	---	---	0	0	0	0	0	0	0	0	0	0	0	0	0	1	1	0	0	0	0	0	1	1	0	0	1	0	0	0	0	1	0	0	0	0	0
	217	M00924	Cobalamin biosynthesis, anaerobic, uroporphyrinogen III => sirohydrochlorin => cobyrinate a,c-diamide	map01100	Metabolic pathways	---	---	---	cobL-cbiET	precorrin-6B C5,15-methyltransferase / cobalt-precorrin-6B C5,C15-methyltransferase [EC:2.1.1.132 2.1.1.289 2.1.1.196]	ec:2.1.1.196	K00595	---	---	0	0	0	0	0	0	0	0	0	0	0	0	0	1	1	0	0	0	0	0	1	1	0	0	1	0	0	0	0	1	0	0	0	0	0
	218	M00924	Cobalamin biosynthesis, anaerobic, uroporphyrinogen III => sirohydrochlorin => cobyrinate a,c-diamide	map01240	Biosynthesis of cofactors	---	---	---	cobL-cbiET	precorrin-6B C5,15-methyltransferase / cobalt-precorrin-6B C5,C15-methyltransferase [EC:2.1.1.132 2.1.1.289 2.1.1.196]	ec:2.1.1.132	K00595	---	---	0	0	0	0	0	0	0	0	0	0	0	0	0	1	1	0	0	0	0	0	1	1	0	0	1	0	0	0	0	1	0	0	0	0	0
	219	M00924	Cobalamin biosynthesis, anaerobic, uroporphyrinogen III => sirohydrochlorin => cobyrinate a,c-diamide	map01240	Biosynthesis of cofactors	---	---	---	cobL-cbiET	precorrin-6B C5,15-methyltransferase / cobalt-precorrin-6B C5,C15-methyltransferase [EC:2.1.1.132 2.1.1.289 2.1.1.196]	ec:2.1.1.289	K00595	---	---	0	0	0	0	0	0	0	0	0	0	0	0	0	1	1	0	0	0	0	0	1	1	0	0	1	0	0	0	0	1	0	0	0	0	0
	220	M00924	Cobalamin biosynthesis, anaerobic, uroporphyrinogen III => sirohydrochlorin => cobyrinate a,c-diamide	map01240	Biosynthesis of cofactors	---	---	---	cobL-cbiET	precorrin-6B C5,15-methyltransferase / cobalt-precorrin-6B C5,C15-methyltransferase [EC:2.1.1.132 2.1.1.289 2.1.1.196]	ec:2.1.1.196	K00595	---	---	0	0	0	0	0	0	0	0	0	0	0	0	0	1	1	0	0	0	0	0	1	1	0	0	1	0	0	0	0	1	0	0	0	0	0
	221	M00924	Cobalamin biosynthesis, anaerobic, uroporphyrinogen III => sirohydrochlorin => cobyrinate a,c-diamide	map00860	Porphyrin and chlorophyll metabolism	---	---	---	cobH-cbiC	precorrin-8X/cobalt-precorrin-8 methylmutase [EC:5.4.99.61 5.4.99.60]	ec:5.4.99.61	K06042	---	---	0	0	0	0	0	0	0	0	0	0	0	0	0	1	1	0	0	0	0	0	1	1	0	0	0	0	0	0	0	1	0	0	0	0	0
	222	M00924	Cobalamin biosynthesis, anaerobic, uroporphyrinogen III => sirohydrochlorin => cobyrinate a,c-diamide	map00860	Porphyrin and chlorophyll metabolism	---	---	---	cobH-cbiC	precorrin-8X/cobalt-precorrin-8 methylmutase [EC:5.4.99.61 5.4.99.60]	ec:5.4.99.60	K06042	---	---	0	0	0	0	0	0	0	0	0	0	0	0	0	1	1	0	0	0	0	0	1	1	0	0	0	0	0	0	0	1	0	0	0	0	0
	223	M00924	Cobalamin biosynthesis, anaerobic, uroporphyrinogen III => sirohydrochlorin => cobyrinate a,c-diamide	map01100	Metabolic pathways	---	---	---	cobH-cbiC	precorrin-8X/cobalt-precorrin-8 methylmutase [EC:5.4.99.61 5.4.99.60]	ec:5.4.99.61	K06042	---	---	0	0	0	0	0	0	0	0	0	0	0	0	0	1	1	0	0	0	0	0	1	1	0	0	0	0	0	0	0	1	0	0	0	0	0
	224	M00924	Cobalamin biosynthesis, anaerobic, uroporphyrinogen III => sirohydrochlorin => cobyrinate a,c-diamide	map01100	Metabolic pathways	---	---	---	cobH-cbiC	precorrin-8X/cobalt-precorrin-8 methylmutase [EC:5.4.99.61 5.4.99.60]	ec:5.4.99.60	K06042	---	---	0	0	0	0	0	0	0	0	0	0	0	0	0	1	1	0	0	0	0	0	1	1	0	0	0	0	0	0	0	1	0	0	0	0	0
	225	M00924	Cobalamin biosynthesis, anaerobic, uroporphyrinogen III => sirohydrochlorin => cobyrinate a,c-diamide	map01240	Biosynthesis of cofactors	---	---	---	cobH-cbiC	precorrin-8X/cobalt-precorrin-8 methylmutase [EC:5.4.99.61 5.4.99.60]	ec:5.4.99.61	K06042	---	---	0	0	0	0	0	0	0	0	0	0	0	0	0	1	1	0	0	0	0	0	1	1	0	0	0	0	0	0	0	1	0	0	0	0	0
	226	M00924	Cobalamin biosynthesis, anaerobic, uroporphyrinogen III => sirohydrochlorin => cobyrinate a,c-diamide	map01240	Biosynthesis of cofactors	---	---	---	cobH-cbiC	precorrin-8X/cobalt-precorrin-8 methylmutase [EC:5.4.99.61 5.4.99.60]	ec:5.4.99.60	K06042	---	---	0	0	0	0	0	0	0	0	0	0	0	0	0	1	1	0	0	0	0	0	1	1	0	0	0	0	0	0	0	1	0	0	0	0	0
	227	M00923	UDP-L-FucNAm biosynthesis	map00520	Amino sugar and nucleotide sugar metabolism	---	---	---	pseB, wbjB	UDP-N-acetylglucosamine 4,6-dehydratase/5-epimerase [EC:4.2.1.115 5.1.3.-]	ec:4.2.1.115	K15894	---	---	0	0	1	0	0	0	0	0	0	0	0	0	0	0	0	0	0	0	1	0	0	0	0	0	0	0	1	1	1	0	0	1	0	0	0
	228	M00923	UDP-L-FucNAm biosynthesis	map00541	O-Antigen nucleotide sugar biosynthesis	---	---	---	pseB, wbjB	UDP-N-acetylglucosamine 4,6-dehydratase/5-epimerase [EC:4.2.1.115 5.1.3.-]	ec:4.2.1.115	K15894	---	---	0	0	1	0	0	0	0	0	0	0	0	0	0	0	0	0	0	0	1	0	0	0	0	0	0	0	1	1	1	0	0	1	0	0	0
	229	M00923	UDP-L-FucNAm biosynthesis	map01100	Metabolic pathways	---	---	---	pseB, wbjB	UDP-N-acetylglucosamine 4,6-dehydratase/5-epimerase [EC:4.2.1.115 5.1.3.-]	ec:4.2.1.115	K15894	---	---	0	0	1	0	0	0	0	0	0	0	0	0	0	0	0	0	0	0	1	0	0	0	0	0	0	0	1	1	1	0	0	1	0	0	0
	230	M00923	UDP-L-FucNAm biosynthesis	map00541	O-Antigen nucleotide sugar biosynthesis	---	---	---	wbjD	UDP-N-acetyl-L-fucosamine synthase [EC:5.1.3.28]	ec:5.1.3.28	K24258	---	---	0	0	0	0	0	0	0	0	0	0	0	0	0	0	0	0	0	0	1	0	0	0	0	0	0	0	0	1	0	0	0	0	0	0	0
	231	M00923	UDP-L-FucNAm biosynthesis	map01100	Metabolic pathways	---	---	---	wbjD	UDP-N-acetyl-L-fucosamine synthase [EC:5.1.3.28]	ec:5.1.3.28	K24258	---	---	0	0	0	0	0	0	0	0	0	0	0	0	0	0	0	0	0	0	1	0	0	0	0	0	0	0	0	1	0	0	0	0	0	0	0
	232	M00923	UDP-L-FucNAm biosynthesis	map00541	O-Antigen nucleotide sugar biosynthesis	---	---	---	wbjC	UDP-2-acetamido-2,6-beta-L-arabino-hexul-4-ose reductase [EC:1.1.1.367]	ec:1.1.1.367	K19068	---	---	0	0	0	0	0	0	0	0	0	0	0	0	0	0	0	0	0	0	1	0	0	0	0	0	0	0	0	1	0	0	0	0	0	0	0
	233	M00923	UDP-L-FucNAm biosynthesis	map01100	Metabolic pathways	---	---	---	wbjC	UDP-2-acetamido-2,6-beta-L-arabino-hexul-4-ose reductase [EC:1.1.1.367]	ec:1.1.1.367	K19068	---	---	0	0	0	0	0	0	0	0	0	0	0	0	0	0	0	0	0	0	1	0	0	0	0	0	0	0	0	1	0	0	0	0	0	0	0
	234	M00921	Cyclooctatin biosynthesis, dimethylallyl-PP + isopentenyl-PP => cyclooctatin	map00900	Terpenoid backbone biosynthesis	---	---	---	idsA	geranylgeranyl diphosphate synthase, type I [EC:2.5.1.1 2.5.1.10 2.5.1.29]	ec:2.5.1.1	K13787	---	---	0	0	0	0	0	0	0	0	0	0	0	0	0	0	0	0	0	0	0	0	0	0	0	0	0	1	0	0	0	0	0	0	0	0	0
	235	M00921	Cyclooctatin biosynthesis, dimethylallyl-PP + isopentenyl-PP => cyclooctatin	map00900	Terpenoid backbone biosynthesis	---	---	---	idsA	geranylgeranyl diphosphate synthase, type I [EC:2.5.1.1 2.5.1.10 2.5.1.29]	ec:2.5.1.10	K13787	---	---	0	0	0	0	0	0	0	0	0	0	0	0	0	0	0	0	0	0	0	0	0	0	0	0	0	1	0	0	0	0	0	0	0	0	0
	236	M00921	Cyclooctatin biosynthesis, dimethylallyl-PP + isopentenyl-PP => cyclooctatin	map00900	Terpenoid backbone biosynthesis	---	---	---	idsA	geranylgeranyl diphosphate synthase, type I [EC:2.5.1.1 2.5.1.10 2.5.1.29]	ec:2.5.1.29	K13787	---	---	0	0	0	0	0	0	0	0	0	0	0	0	0	0	0	0	0	0	0	0	0	0	0	0	0	1	0	0	0	0	0	0	0	0	0
	237	M00921	Cyclooctatin biosynthesis, dimethylallyl-PP + isopentenyl-PP => cyclooctatin	map01100	Metabolic pathways	---	---	---	idsA	geranylgeranyl diphosphate synthase, type I [EC:2.5.1.1 2.5.1.10 2.5.1.29]	ec:2.5.1.1	K13787	---	---	0	0	0	0	0	0	0	0	0	0	0	0	0	0	0	0	0	0	0	0	0	0	0	0	0	1	0	0	0	0	0	0	0	0	0
	238	M00921	Cyclooctatin biosynthesis, dimethylallyl-PP + isopentenyl-PP => cyclooctatin	map01100	Metabolic pathways	---	---	---	idsA	geranylgeranyl diphosphate synthase, type I [EC:2.5.1.1 2.5.1.10 2.5.1.29]	ec:2.5.1.10	K13787	---	---	0	0	0	0	0	0	0	0	0	0	0	0	0	0	0	0	0	0	0	0	0	0	0	0	0	1	0	0	0	0	0	0	0	0	0
	239	M00921	Cyclooctatin biosynthesis, dimethylallyl-PP + isopentenyl-PP => cyclooctatin	map01100	Metabolic pathways	---	---	---	idsA	geranylgeranyl diphosphate synthase, type I [EC:2.5.1.1 2.5.1.10 2.5.1.29]	ec:2.5.1.29	K13787	---	---	0	0	0	0	0	0	0	0	0	0	0	0	0	0	0	0	0	0	0	0	0	0	0	0	0	1	0	0	0	0	0	0	0	0	0
	240	M00921	Cyclooctatin biosynthesis, dimethylallyl-PP + isopentenyl-PP => cyclooctatin	map01110	Biosynthesis of secondary metabolites	---	---	---	idsA	geranylgeranyl diphosphate synthase, type I [EC:2.5.1.1 2.5.1.10 2.5.1.29]	ec:2.5.1.1	K13787	---	---	0	0	0	0	0	0	0	0	0	0	0	0	0	0	0	0	0	0	0	0	0	0	0	0	0	1	0	0	0	0	0	0	0	0	0
	241	M00921	Cyclooctatin biosynthesis, dimethylallyl-PP + isopentenyl-PP => cyclooctatin	map01110	Biosynthesis of secondary metabolites	---	---	---	idsA	geranylgeranyl diphosphate synthase, type I [EC:2.5.1.1 2.5.1.10 2.5.1.29]	ec:2.5.1.10	K13787	---	---	0	0	0	0	0	0	0	0	0	0	0	0	0	0	0	0	0	0	0	0	0	0	0	0	0	1	0	0	0	0	0	0	0	0	0
	242	M00921	Cyclooctatin biosynthesis, dimethylallyl-PP + isopentenyl-PP => cyclooctatin	map01110	Biosynthesis of secondary metabolites	---	---	---	idsA	geranylgeranyl diphosphate synthase, type I [EC:2.5.1.1 2.5.1.10 2.5.1.29]	ec:2.5.1.29	K13787	---	---	0	0	0	0	0	0	0	0	0	0	0	0	0	0	0	0	0	0	0	0	0	0	0	0	0	1	0	0	0	0	0	0	0	0	0
	243	M00919	Ectoine degradation, ectoine => aspartate	map00260	Glycine, serine and threonine metabolism	---	---	---	doeA	ectoine hydrolase [EC:3.5.4.44]	ec:3.5.4.44	K15783	---	---	1	0	0	1	0	0	0	1	0	0	0	0	0	1	1	0	1	0	0	0	1	1	0	1	1	0	0	0	0	1	0	0	0	1	1
	244	M00919	Ectoine degradation, ectoine => aspartate	map01100	Metabolic pathways	---	---	---	doeA	ectoine hydrolase [EC:3.5.4.44]	ec:3.5.4.44	K15783	---	---	1	0	0	1	0	0	0	1	0	0	0	0	0	1	1	0	1	0	0	0	1	1	0	1	1	0	0	0	0	1	0	0	0	1	1
	245	M00919	Ectoine degradation, ectoine => aspartate	map01120	Microbial metabolism in diverse environments	---	---	---	doeA	ectoine hydrolase [EC:3.5.4.44]	ec:3.5.4.44	K15783	---	---	1	0	0	1	0	0	0	1	0	0	0	0	0	1	1	0	1	0	0	0	1	1	0	1	1	0	0	0	0	1	0	0	0	1	1
	246	M00919	Ectoine degradation, ectoine => aspartate	map00260	Glycine, serine and threonine metabolism	---	---	---	doeC	aspartate-semialdehyde dehydrogenase [EC:1.2.1.-]	---	K15786	---	---	1	0	0	0	0	0	0	0	0	0	0	0	0	0	0	0	1	0	0	0	0	0	0	0	1	0	0	0	0	0	0	0	0	0	0
	247	M00919	Ectoine degradation, ectoine => aspartate	map01100	Metabolic pathways	---	---	---	doeC	aspartate-semialdehyde dehydrogenase [EC:1.2.1.-]	---	K15786	---	---	1	0	0	0	0	0	0	0	0	0	0	0	0	0	0	0	1	0	0	0	0	0	0	0	1	0	0	0	0	0	0	0	0	0	0
	248	M00919	Ectoine degradation, ectoine => aspartate	map01120	Microbial metabolism in diverse environments	---	---	---	doeC	aspartate-semialdehyde dehydrogenase [EC:1.2.1.-]	---	K15786	---	---	1	0	0	0	0	0	0	0	0	0	0	0	0	0	0	0	1	0	0	0	0	0	0	0	1	0	0	0	0	0	0	0	0	0	0
	249	M00919	Ectoine degradation, ectoine => aspartate	map00260	Glycine, serine and threonine metabolism	---	---	---	doeD	L-2,4-diaminobutyrate transaminase [EC:2.6.1.76]	ec:2.6.1.76	K15785	---	---	1	0	0	1	0	0	0	1	0	0	0	0	0	1	0	0	1	0	0	0	0	1	0	1	1	0	0	0	0	1	0	0	0	1	1
	250	M00919	Ectoine degradation, ectoine => aspartate	map01100	Metabolic pathways	---	---	---	doeD	L-2,4-diaminobutyrate transaminase [EC:2.6.1.76]	ec:2.6.1.76	K15785	---	---	1	0	0	1	0	0	0	1	0	0	0	0	0	1	0	0	1	0	0	0	0	1	0	1	1	0	0	0	0	1	0	0	0	1	1
	251	M00919	Ectoine degradation, ectoine => aspartate	map01120	Microbial metabolism in diverse environments	---	---	---	doeD	L-2,4-diaminobutyrate transaminase [EC:2.6.1.76]	ec:2.6.1.76	K15785	---	---	1	0	0	1	0	0	0	1	0	0	0	0	0	1	0	0	1	0	0	0	0	1	0	1	1	0	0	0	0	1	0	0	0	1	1
	252	M00919	Ectoine degradation, ectoine => aspartate	map00260	Glycine, serine and threonine metabolism	---	---	---	doeB	N2-acetyl-L-2,4-diaminobutanoate deacetylase [EC:3.5.1.125]	ec:3.5.1.125	K15784	---	---	0	0	1	0	0	0	0	0	1	0	0	0	0	0	0	0	0	0	0	1	0	0	0	0	0	0	0	0	0	1	1	0	0	0	0
	253	M00919	Ectoine degradation, ectoine => aspartate	map01100	Metabolic pathways	---	---	---	doeB	N2-acetyl-L-2,4-diaminobutanoate deacetylase [EC:3.5.1.125]	ec:3.5.1.125	K15784	---	---	0	0	1	0	0	0	0	0	1	0	0	0	0	0	0	0	0	0	0	1	0	0	0	0	0	0	0	0	0	1	1	0	0	0	0
	254	M00919	Ectoine degradation, ectoine => aspartate	map01120	Microbial metabolism in diverse environments	---	---	---	doeB	N2-acetyl-L-2,4-diaminobutanoate deacetylase [EC:3.5.1.125]	ec:3.5.1.125	K15784	---	---	0	0	1	0	0	0	0	0	1	0	0	0	0	0	0	0	0	0	0	1	0	0	0	0	0	0	0	0	0	1	1	0	0	0	0
	255	M00918	Aerobactin biosynthesis, lysine => aerobactin	map00997	Biosynthesis of various secondary metabolites - part 3	---	---	---	iucB	acetyl CoA:N6-hydroxylysine acetyl transferase [EC:2.3.1.102]	ec:2.3.1.102	K03896	---	---	0	0	0	0	0	0	0	0	1	0	0	0	0	0	0	0	0	0	0	0	0	0	0	0	0	0	0	0	0	0	1	0	0	0	0
	256	M00918	Aerobactin biosynthesis, lysine => aerobactin	map01100	Metabolic pathways	---	---	---	iucB	acetyl CoA:N6-hydroxylysine acetyl transferase [EC:2.3.1.102]	ec:2.3.1.102	K03896	---	---	0	0	0	0	0	0	0	0	1	0	0	0	0	0	0	0	0	0	0	0	0	0	0	0	0	0	0	0	0	0	1	0	0	0	0
	257	M00918	Aerobactin biosynthesis, lysine => aerobactin	map01110	Biosynthesis of secondary metabolites	---	---	---	iucB	acetyl CoA:N6-hydroxylysine acetyl transferase [EC:2.3.1.102]	ec:2.3.1.102	K03896	---	---	0	0	0	0	0	0	0	0	1	0	0	0	0	0	0	0	0	0	0	0	0	0	0	0	0	0	0	0	0	0	1	0	0	0	0
	258	M00918	Aerobactin biosynthesis, lysine => aerobactin	map01120	Microbial metabolism in diverse environments	---	---	---	iucB	acetyl CoA:N6-hydroxylysine acetyl transferase [EC:2.3.1.102]	ec:2.3.1.102	K03896	---	---	0	0	0	0	0	0	0	0	1	0	0	0	0	0	0	0	0	0	0	0	0	0	0	0	0	0	0	0	0	0	1	0	0	0	0
	259	M00917	Phytosterol biosynthesis, squalene 2,3-epoxide => campesterol/sitosterol	map00100	Steroid biosynthesis	---	---	---	SC5DL, ERG3	Delta7-sterol 5-desaturase [EC:1.14.19.20]	ec:1.14.19.20	K00227	---	---	0	0	0	0	1	0	0	0	0	0	0	0	0	0	2	0	0	0	0	0	2	0	0	0	0	0	0	0	0	0	0	0	0	0	0
	260	M00917	Phytosterol biosynthesis, squalene 2,3-epoxide => campesterol/sitosterol	map01100	Metabolic pathways	---	---	---	SC5DL, ERG3	Delta7-sterol 5-desaturase [EC:1.14.19.20]	ec:1.14.19.20	K00227	---	---	0	0	0	0	1	0	0	0	0	0	0	0	0	0	2	0	0	0	0	0	2	0	0	0	0	0	0	0	0	0	0	0	0	0	0
	261	M00917	Phytosterol biosynthesis, squalene 2,3-epoxide => campesterol/sitosterol	map01110	Biosynthesis of secondary metabolites	---	---	---	SC5DL, ERG3	Delta7-sterol 5-desaturase [EC:1.14.19.20]	ec:1.14.19.20	K00227	---	---	0	0	0	0	1	0	0	0	0	0	0	0	0	0	2	0	0	0	0	0	2	0	0	0	0	0	0	0	0	0	0	0	0	0	0
	262	M00914	Coenzyme A biosynthesis, archaea, 2-oxoisovalerate => 4-phosphopantoate => CoA	map00770	Pantothenate and CoA biosynthesis	---	---	---	coaBC, dfp	phosphopantothenoylcysteine decarboxylase / phosphopantothenate---cysteine ligase [EC:4.1.1.36 6.3.2.5]	ec:4.1.1.36	K13038	---	---	1	1	1	1	1	1	1	1	1	1	1	1	1	1	1	1	1	1	1	1	1	1	1	1	1	1	1	1	1	1	1	1	1	1	1
	263	M00914	Coenzyme A biosynthesis, archaea, 2-oxoisovalerate => 4-phosphopantoate => CoA	map00770	Pantothenate and CoA biosynthesis	---	---	---	coaBC, dfp	phosphopantothenoylcysteine decarboxylase / phosphopantothenate---cysteine ligase [EC:4.1.1.36 6.3.2.5]	ec:6.3.2.5	K13038	---	---	1	1	1	1	1	1	1	1	1	1	1	1	1	1	1	1	1	1	1	1	1	1	1	1	1	1	1	1	1	1	1	1	1	1	1
	264	M00914	Coenzyme A biosynthesis, archaea, 2-oxoisovalerate => 4-phosphopantoate => CoA	map01100	Metabolic pathways	---	---	---	coaBC, dfp	phosphopantothenoylcysteine decarboxylase / phosphopantothenate---cysteine ligase [EC:4.1.1.36 6.3.2.5]	ec:4.1.1.36	K13038	---	---	1	1	1	1	1	1	1	1	1	1	1	1	1	1	1	1	1	1	1	1	1	1	1	1	1	1	1	1	1	1	1	1	1	1	1
	265	M00914	Coenzyme A biosynthesis, archaea, 2-oxoisovalerate => 4-phosphopantoate => CoA	map01100	Metabolic pathways	---	---	---	coaBC, dfp	phosphopantothenoylcysteine decarboxylase / phosphopantothenate---cysteine ligase [EC:4.1.1.36 6.3.2.5]	ec:6.3.2.5	K13038	---	---	1	1	1	1	1	1	1	1	1	1	1	1	1	1	1	1	1	1	1	1	1	1	1	1	1	1	1	1	1	1	1	1	1	1	1
	266	M00914	Coenzyme A biosynthesis, archaea, 2-oxoisovalerate => 4-phosphopantoate => CoA	map01240	Biosynthesis of cofactors	---	---	---	coaBC, dfp	phosphopantothenoylcysteine decarboxylase / phosphopantothenate---cysteine ligase [EC:4.1.1.36 6.3.2.5]	ec:4.1.1.36	K13038	---	---	1	1	1	1	1	1	1	1	1	1	1	1	1	1	1	1	1	1	1	1	1	1	1	1	1	1	1	1	1	1	1	1	1	1	1
	267	M00914	Coenzyme A biosynthesis, archaea, 2-oxoisovalerate => 4-phosphopantoate => CoA	map01240	Biosynthesis of cofactors	---	---	---	coaBC, dfp	phosphopantothenoylcysteine decarboxylase / phosphopantothenate---cysteine ligase [EC:4.1.1.36 6.3.2.5]	ec:6.3.2.5	K13038	---	---	1	1	1	1	1	1	1	1	1	1	1	1	1	1	1	1	1	1	1	1	1	1	1	1	1	1	1	1	1	1	1	1	1	1	1
	268	M00914	Coenzyme A biosynthesis, archaea, 2-oxoisovalerate => 4-phosphopantoate => CoA	map00770	Pantothenate and CoA biosynthesis	---	---	---	panB	3-methyl-2-oxobutanoate hydroxymethyltransferase [EC:2.1.2.11]	ec:2.1.2.11	K00606	---	---	1	1	1	0	1	1	1	1	1	0	1	1	1	1	0	1	1	1	1	1	0	1	1	0	0	1	1	1	1	1	1	1	1	1	1
	269	M00914	Coenzyme A biosynthesis, archaea, 2-oxoisovalerate => 4-phosphopantoate => CoA	map01100	Metabolic pathways	---	---	---	panB	3-methyl-2-oxobutanoate hydroxymethyltransferase [EC:2.1.2.11]	ec:2.1.2.11	K00606	---	---	1	1	1	0	1	1	1	1	1	0	1	1	1	1	0	1	1	1	1	1	0	1	1	0	0	1	1	1	1	1	1	1	1	1	1
	270	M00914	Coenzyme A biosynthesis, archaea, 2-oxoisovalerate => 4-phosphopantoate => CoA	map01110	Biosynthesis of secondary metabolites	---	---	---	panB	3-methyl-2-oxobutanoate hydroxymethyltransferase [EC:2.1.2.11]	ec:2.1.2.11	K00606	---	---	1	1	1	0	1	1	1	1	1	0	1	1	1	1	0	1	1	1	1	1	0	1	1	0	0	1	1	1	1	1	1	1	1	1	1
	271	M00914	Coenzyme A biosynthesis, archaea, 2-oxoisovalerate => 4-phosphopantoate => CoA	map01240	Biosynthesis of cofactors	---	---	---	panB	3-methyl-2-oxobutanoate hydroxymethyltransferase [EC:2.1.2.11]	ec:2.1.2.11	K00606	---	---	1	1	1	0	1	1	1	1	1	0	1	1	1	1	0	1	1	1	1	1	0	1	1	0	0	1	1	1	1	1	1	1	1	1	1
	272	M00914	Coenzyme A biosynthesis, archaea, 2-oxoisovalerate => 4-phosphopantoate => CoA	map00770	Pantothenate and CoA biosynthesis	---	---	---	panE, apbA	2-dehydropantoate 2-reductase [EC:1.1.1.169]	ec:1.1.1.169	K00077	---	---	0	3	2	0	0	2	2	0	2	0	0	1	0	1	2	0	0	5	0	2	2	1	2	0	1	0	2	0	3	1	2	2	3	1	1
	273	M00914	Coenzyme A biosynthesis, archaea, 2-oxoisovalerate => 4-phosphopantoate => CoA	map01100	Metabolic pathways	---	---	---	panE, apbA	2-dehydropantoate 2-reductase [EC:1.1.1.169]	ec:1.1.1.169	K00077	---	---	0	3	2	0	0	2	2	0	2	0	0	1	0	1	2	0	0	5	0	2	2	1	2	0	1	0	2	0	3	1	2	2	3	1	1
	274	M00914	Coenzyme A biosynthesis, archaea, 2-oxoisovalerate => 4-phosphopantoate => CoA	map01110	Biosynthesis of secondary metabolites	---	---	---	panE, apbA	2-dehydropantoate 2-reductase [EC:1.1.1.169]	ec:1.1.1.169	K00077	---	---	0	3	2	0	0	2	2	0	2	0	0	1	0	1	2	0	0	5	0	2	2	1	2	0	1	0	2	0	3	1	2	2	3	1	1
	275	M00914	Coenzyme A biosynthesis, archaea, 2-oxoisovalerate => 4-phosphopantoate => CoA	map01240	Biosynthesis of cofactors	---	---	---	panE, apbA	2-dehydropantoate 2-reductase [EC:1.1.1.169]	ec:1.1.1.169	K00077	---	---	0	3	2	0	0	2	2	0	2	0	0	1	0	1	2	0	0	5	0	2	2	1	2	0	1	0	2	0	3	1	2	2	3	1	1
	276	M00913	Pantothenate biosynthesis, 2-oxoisovalerate/spermine => pantothenate	map00010	Glycolysis / Gluconeogenesis	Fermentation	Mixed acid: ethanol, acetate to acetylaldehyde	aldehyde dehydrogenase (NAD+)	ALDH	aldehyde dehydrogenase (NAD+) [EC:1.2.1.3]	ec:1.2.1.3	K00128	---	---	1	0	0	1	0	0	0	0	0	0	0	0	0	0	1	0	0	0	0	0	1	0	0	1	1	0	0	0	0	1	0	0	0	1	1
	277	M00913	Pantothenate biosynthesis, 2-oxoisovalerate/spermine => pantothenate	map00053	Ascorbate and aldarate metabolism	Fermentation	Mixed acid: ethanol, acetate to acetylaldehyde	aldehyde dehydrogenase (NAD+)	ALDH	aldehyde dehydrogenase (NAD+) [EC:1.2.1.3]	ec:1.2.1.3	K00128	---	---	1	0	0	1	0	0	0	0	0	0	0	0	0	0	1	0	0	0	0	0	1	0	0	1	1	0	0	0	0	1	0	0	0	1	1
	278	M00913	Pantothenate biosynthesis, 2-oxoisovalerate/spermine => pantothenate	map00071	Fatty acid degradation	Fermentation	Mixed acid: ethanol, acetate to acetylaldehyde	aldehyde dehydrogenase (NAD+)	ALDH	aldehyde dehydrogenase (NAD+) [EC:1.2.1.3]	ec:1.2.1.3	K00128	---	---	1	0	0	1	0	0	0	0	0	0	0	0	0	0	1	0	0	0	0	0	1	0	0	1	1	0	0	0	0	1	0	0	0	1	1
	279	M00913	Pantothenate biosynthesis, 2-oxoisovalerate/spermine => pantothenate	map00280	Valine, leucine and isoleucine degradation	Fermentation	Mixed acid: ethanol, acetate to acetylaldehyde	aldehyde dehydrogenase (NAD+)	ALDH	aldehyde dehydrogenase (NAD+) [EC:1.2.1.3]	ec:1.2.1.3	K00128	---	---	1	0	0	1	0	0	0	0	0	0	0	0	0	0	1	0	0	0	0	0	1	0	0	1	1	0	0	0	0	1	0	0	0	1	1
	280	M00913	Pantothenate biosynthesis, 2-oxoisovalerate/spermine => pantothenate	map00310	Lysine degradation	Fermentation	Mixed acid: ethanol, acetate to acetylaldehyde	aldehyde dehydrogenase (NAD+)	ALDH	aldehyde dehydrogenase (NAD+) [EC:1.2.1.3]	ec:1.2.1.3	K00128	---	---	1	0	0	1	0	0	0	0	0	0	0	0	0	0	1	0	0	0	0	0	1	0	0	1	1	0	0	0	0	1	0	0	0	1	1
	281	M00913	Pantothenate biosynthesis, 2-oxoisovalerate/spermine => pantothenate	map00330	Arginine and proline metabolism	Fermentation	Mixed acid: ethanol, acetate to acetylaldehyde	aldehyde dehydrogenase (NAD+)	ALDH	aldehyde dehydrogenase (NAD+) [EC:1.2.1.3]	ec:1.2.1.3	K00128	---	---	1	0	0	1	0	0	0	0	0	0	0	0	0	0	1	0	0	0	0	0	1	0	0	1	1	0	0	0	0	1	0	0	0	1	1
	282	M00913	Pantothenate biosynthesis, 2-oxoisovalerate/spermine => pantothenate	map00340	Histidine metabolism	Fermentation	Mixed acid: ethanol, acetate to acetylaldehyde	aldehyde dehydrogenase (NAD+)	ALDH	aldehyde dehydrogenase (NAD+) [EC:1.2.1.3]	ec:1.2.1.3	K00128	---	---	1	0	0	1	0	0	0	0	0	0	0	0	0	0	1	0	0	0	0	0	1	0	0	1	1	0	0	0	0	1	0	0	0	1	1
	283	M00913	Pantothenate biosynthesis, 2-oxoisovalerate/spermine => pantothenate	map00380	Tryptophan metabolism	Fermentation	Mixed acid: ethanol, acetate to acetylaldehyde	aldehyde dehydrogenase (NAD+)	ALDH	aldehyde dehydrogenase (NAD+) [EC:1.2.1.3]	ec:1.2.1.3	K00128	---	---	1	0	0	1	0	0	0	0	0	0	0	0	0	0	1	0	0	0	0	0	1	0	0	1	1	0	0	0	0	1	0	0	0	1	1
	284	M00913	Pantothenate biosynthesis, 2-oxoisovalerate/spermine => pantothenate	map00410	beta-Alanine metabolism	Fermentation	Mixed acid: ethanol, acetate to acetylaldehyde	aldehyde dehydrogenase (NAD+)	ALDH	aldehyde dehydrogenase (NAD+) [EC:1.2.1.3]	ec:1.2.1.3	K00128	---	---	1	0	0	1	0	0	0	0	0	0	0	0	0	0	1	0	0	0	0	0	1	0	0	1	1	0	0	0	0	1	0	0	0	1	1
	285	M00913	Pantothenate biosynthesis, 2-oxoisovalerate/spermine => pantothenate	map00561	Glycerolipid metabolism	Fermentation	Mixed acid: ethanol, acetate to acetylaldehyde	aldehyde dehydrogenase (NAD+)	ALDH	aldehyde dehydrogenase (NAD+) [EC:1.2.1.3]	ec:1.2.1.3	K00128	---	---	1	0	0	1	0	0	0	0	0	0	0	0	0	0	1	0	0	0	0	0	1	0	0	1	1	0	0	0	0	1	0	0	0	1	1
	286	M00913	Pantothenate biosynthesis, 2-oxoisovalerate/spermine => pantothenate	map00620	Pyruvate metabolism	Fermentation	Mixed acid: ethanol, acetate to acetylaldehyde	aldehyde dehydrogenase (NAD+)	ALDH	aldehyde dehydrogenase (NAD+) [EC:1.2.1.3]	ec:1.2.1.3	K00128	---	---	1	0	0	1	0	0	0	0	0	0	0	0	0	0	1	0	0	0	0	0	1	0	0	1	1	0	0	0	0	1	0	0	0	1	1
	287	M00913	Pantothenate biosynthesis, 2-oxoisovalerate/spermine => pantothenate	map00625	Chloroalkane and chloroalkene degradation	Fermentation	Mixed acid: ethanol, acetate to acetylaldehyde	aldehyde dehydrogenase (NAD+)	ALDH	aldehyde dehydrogenase (NAD+) [EC:1.2.1.3]	ec:1.2.1.3	K00128	---	---	1	0	0	1	0	0	0	0	0	0	0	0	0	0	1	0	0	0	0	0	1	0	0	1	1	0	0	0	0	1	0	0	0	1	1
	288	M00913	Pantothenate biosynthesis, 2-oxoisovalerate/spermine => pantothenate	map00770	Pantothenate and CoA biosynthesis	Fermentation	Mixed acid: ethanol, acetate to acetylaldehyde	aldehyde dehydrogenase (NAD+)	ALDH	aldehyde dehydrogenase (NAD+) [EC:1.2.1.3]	ec:1.2.1.3	K00128	---	---	1	0	0	1	0	0	0	0	0	0	0	0	0	0	1	0	0	0	0	0	1	0	0	1	1	0	0	0	0	1	0	0	0	1	1
	289	M00913	Pantothenate biosynthesis, 2-oxoisovalerate/spermine => pantothenate	map00903	Limonene and pinene degradation	Fermentation	Mixed acid: ethanol, acetate to acetylaldehyde	aldehyde dehydrogenase (NAD+)	ALDH	aldehyde dehydrogenase (NAD+) [EC:1.2.1.3]	ec:1.2.1.3	K00128	---	---	1	0	0	1	0	0	0	0	0	0	0	0	0	0	1	0	0	0	0	0	1	0	0	1	1	0	0	0	0	1	0	0	0	1	1
	290	M00913	Pantothenate biosynthesis, 2-oxoisovalerate/spermine => pantothenate	map00981	Insect hormone biosynthesis	Fermentation	Mixed acid: ethanol, acetate to acetylaldehyde	aldehyde dehydrogenase (NAD+)	ALDH	aldehyde dehydrogenase (NAD+) [EC:1.2.1.3]	ec:1.2.1.3	K00128	---	---	1	0	0	1	0	0	0	0	0	0	0	0	0	0	1	0	0	0	0	0	1	0	0	1	1	0	0	0	0	1	0	0	0	1	1
	291	M00913	Pantothenate biosynthesis, 2-oxoisovalerate/spermine => pantothenate	map01100	Metabolic pathways	Fermentation	Mixed acid: ethanol, acetate to acetylaldehyde	aldehyde dehydrogenase (NAD+)	ALDH	aldehyde dehydrogenase (NAD+) [EC:1.2.1.3]	ec:1.2.1.3	K00128	---	---	1	0	0	1	0	0	0	0	0	0	0	0	0	0	1	0	0	0	0	0	1	0	0	1	1	0	0	0	0	1	0	0	0	1	1
	292	M00913	Pantothenate biosynthesis, 2-oxoisovalerate/spermine => pantothenate	map01110	Biosynthesis of secondary metabolites	Fermentation	Mixed acid: ethanol, acetate to acetylaldehyde	aldehyde dehydrogenase (NAD+)	ALDH	aldehyde dehydrogenase (NAD+) [EC:1.2.1.3]	ec:1.2.1.3	K00128	---	---	1	0	0	1	0	0	0	0	0	0	0	0	0	0	1	0	0	0	0	0	1	0	0	1	1	0	0	0	0	1	0	0	0	1	1
	293	M00913	Pantothenate biosynthesis, 2-oxoisovalerate/spermine => pantothenate	map01120	Microbial metabolism in diverse environments	Fermentation	Mixed acid: ethanol, acetate to acetylaldehyde	aldehyde dehydrogenase (NAD+)	ALDH	aldehyde dehydrogenase (NAD+) [EC:1.2.1.3]	ec:1.2.1.3	K00128	---	---	1	0	0	1	0	0	0	0	0	0	0	0	0	0	1	0	0	0	0	0	1	0	0	1	1	0	0	0	0	1	0	0	0	1	1
	294	M00913	Pantothenate biosynthesis, 2-oxoisovalerate/spermine => pantothenate	map01240	Biosynthesis of cofactors	Fermentation	Mixed acid: ethanol, acetate to acetylaldehyde	aldehyde dehydrogenase (NAD+)	ALDH	aldehyde dehydrogenase (NAD+) [EC:1.2.1.3]	ec:1.2.1.3	K00128	---	---	1	0	0	1	0	0	0	0	0	0	0	0	0	0	1	0	0	0	0	0	1	0	0	1	1	0	0	0	0	1	0	0	0	1	1
	295	M00913	Pantothenate biosynthesis, 2-oxoisovalerate/spermine => pantothenate	map00770	Pantothenate and CoA biosynthesis	---	---	---	panB	3-methyl-2-oxobutanoate hydroxymethyltransferase [EC:2.1.2.11]	ec:2.1.2.11	K00606	---	---	1	1	1	0	1	1	1	1	1	0	1	1	1	1	0	1	1	1	1	1	0	1	1	0	0	1	1	1	1	1	1	1	1	1	1
	296	M00913	Pantothenate biosynthesis, 2-oxoisovalerate/spermine => pantothenate	map01100	Metabolic pathways	---	---	---	panB	3-methyl-2-oxobutanoate hydroxymethyltransferase [EC:2.1.2.11]	ec:2.1.2.11	K00606	---	---	1	1	1	0	1	1	1	1	1	0	1	1	1	1	0	1	1	1	1	1	0	1	1	0	0	1	1	1	1	1	1	1	1	1	1
	297	M00913	Pantothenate biosynthesis, 2-oxoisovalerate/spermine => pantothenate	map01110	Biosynthesis of secondary metabolites	---	---	---	panB	3-methyl-2-oxobutanoate hydroxymethyltransferase [EC:2.1.2.11]	ec:2.1.2.11	K00606	---	---	1	1	1	0	1	1	1	1	1	0	1	1	1	1	0	1	1	1	1	1	0	1	1	0	0	1	1	1	1	1	1	1	1	1	1
	298	M00913	Pantothenate biosynthesis, 2-oxoisovalerate/spermine => pantothenate	map01240	Biosynthesis of cofactors	---	---	---	panB	3-methyl-2-oxobutanoate hydroxymethyltransferase [EC:2.1.2.11]	ec:2.1.2.11	K00606	---	---	1	1	1	0	1	1	1	1	1	0	1	1	1	1	0	1	1	1	1	1	0	1	1	0	0	1	1	1	1	1	1	1	1	1	1
	299	M00913	Pantothenate biosynthesis, 2-oxoisovalerate/spermine => pantothenate	map00410	beta-Alanine metabolism	---	---	---	panC	pantoate--beta-alanine ligase [EC:6.3.2.1]	ec:6.3.2.1	K01918	---	---	1	1	1	0	1	1	1	2	1	0	1	1	0	1	0	1	1	1	1	1	0	1	1	0	0	1	1	1	1	1	1	1	1	1	1
	300	M00913	Pantothenate biosynthesis, 2-oxoisovalerate/spermine => pantothenate	map00770	Pantothenate and CoA biosynthesis	---	---	---	panC	pantoate--beta-alanine ligase [EC:6.3.2.1]	ec:6.3.2.1	K01918	---	---	1	1	1	0	1	1	1	2	1	0	1	1	0	1	0	1	1	1	1	1	0	1	1	0	0	1	1	1	1	1	1	1	1	1	1
	301	M00913	Pantothenate biosynthesis, 2-oxoisovalerate/spermine => pantothenate	map01100	Metabolic pathways	---	---	---	panC	pantoate--beta-alanine ligase [EC:6.3.2.1]	ec:6.3.2.1	K01918	---	---	1	1	1	0	1	1	1	2	1	0	1	1	0	1	0	1	1	1	1	1	0	1	1	0	0	1	1	1	1	1	1	1	1	1	1
	302	M00913	Pantothenate biosynthesis, 2-oxoisovalerate/spermine => pantothenate	map01110	Biosynthesis of secondary metabolites	---	---	---	panC	pantoate--beta-alanine ligase [EC:6.3.2.1]	ec:6.3.2.1	K01918	---	---	1	1	1	0	1	1	1	2	1	0	1	1	0	1	0	1	1	1	1	1	0	1	1	0	0	1	1	1	1	1	1	1	1	1	1
	303	M00913	Pantothenate biosynthesis, 2-oxoisovalerate/spermine => pantothenate	map01240	Biosynthesis of cofactors	---	---	---	panC	pantoate--beta-alanine ligase [EC:6.3.2.1]	ec:6.3.2.1	K01918	---	---	1	1	1	0	1	1	1	2	1	0	1	1	0	1	0	1	1	1	1	1	0	1	1	0	0	1	1	1	1	1	1	1	1	1	1
	304	M00913	Pantothenate biosynthesis, 2-oxoisovalerate/spermine => pantothenate	map00770	Pantothenate and CoA biosynthesis	---	---	---	panE, apbA	2-dehydropantoate 2-reductase [EC:1.1.1.169]	ec:1.1.1.169	K00077	---	---	0	3	2	0	0	2	2	0	2	0	0	1	0	1	2	0	0	5	0	2	2	1	2	0	1	0	2	0	3	1	2	2	3	1	1
	305	M00913	Pantothenate biosynthesis, 2-oxoisovalerate/spermine => pantothenate	map01100	Metabolic pathways	---	---	---	panE, apbA	2-dehydropantoate 2-reductase [EC:1.1.1.169]	ec:1.1.1.169	K00077	---	---	0	3	2	0	0	2	2	0	2	0	0	1	0	1	2	0	0	5	0	2	2	1	2	0	1	0	2	0	3	1	2	2	3	1	1
	306	M00913	Pantothenate biosynthesis, 2-oxoisovalerate/spermine => pantothenate	map01110	Biosynthesis of secondary metabolites	---	---	---	panE, apbA	2-dehydropantoate 2-reductase [EC:1.1.1.169]	ec:1.1.1.169	K00077	---	---	0	3	2	0	0	2	2	0	2	0	0	1	0	1	2	0	0	5	0	2	2	1	2	0	1	0	2	0	3	1	2	2	3	1	1
	307	M00913	Pantothenate biosynthesis, 2-oxoisovalerate/spermine => pantothenate	map01240	Biosynthesis of cofactors	---	---	---	panE, apbA	2-dehydropantoate 2-reductase [EC:1.1.1.169]	ec:1.1.1.169	K00077	---	---	0	3	2	0	0	2	2	0	2	0	0	1	0	1	2	0	0	5	0	2	2	1	2	0	1	0	2	0	3	1	2	2	3	1	1
	308	M00912	NAD biosynthesis, tryptophan => quinolinate => NAD	map00760	Nicotinate and nicotinamide metabolism	---	---	---	nadD	nicotinate-nucleotide adenylyltransferase [EC:2.7.7.18]	ec:2.7.7.18	K00969	---	---	1	1	1	1	1	1	1	1	1	1	1	0	2	1	1	1	1	1	1	1	1	1	1	1	1	1	1	1	1	1	1	1	1	1	1
	309	M00912	NAD biosynthesis, tryptophan => quinolinate => NAD	map01100	Metabolic pathways	---	---	---	nadD	nicotinate-nucleotide adenylyltransferase [EC:2.7.7.18]	ec:2.7.7.18	K00969	---	---	1	1	1	1	1	1	1	1	1	1	1	0	2	1	1	1	1	1	1	1	1	1	1	1	1	1	1	1	1	1	1	1	1	1	1
	310	M00912	NAD biosynthesis, tryptophan => quinolinate => NAD	map01240	Biosynthesis of cofactors	---	---	---	nadD	nicotinate-nucleotide adenylyltransferase [EC:2.7.7.18]	ec:2.7.7.18	K00969	---	---	1	1	1	1	1	1	1	1	1	1	1	0	2	1	1	1	1	1	1	1	1	1	1	1	1	1	1	1	1	1	1	1	1	1	1
	311	M00912	NAD biosynthesis, tryptophan => quinolinate => NAD	map00760	Nicotinate and nicotinamide metabolism	---	---	---	nadE	NAD+ synthase [EC:6.3.1.5]	ec:6.3.1.5	K01916	---	---	1	0	0	1	1	0	0	0	0	0	0	0	1	0	1	0	1	0	0	0	1	0	0	1	0	0	0	0	1	1	0	1	0	0	0
	312	M00912	NAD biosynthesis, tryptophan => quinolinate => NAD	map01100	Metabolic pathways	---	---	---	nadE	NAD+ synthase [EC:6.3.1.5]	ec:6.3.1.5	K01916	---	---	1	0	0	1	1	0	0	0	0	0	0	0	1	0	1	0	1	0	0	0	1	0	0	1	0	0	0	0	1	1	0	1	0	0	0
	313	M00912	NAD biosynthesis, tryptophan => quinolinate => NAD	map01240	Biosynthesis of cofactors	---	---	---	nadE	NAD+ synthase [EC:6.3.1.5]	ec:6.3.1.5	K01916	---	---	1	0	0	1	1	0	0	0	0	0	0	0	1	0	1	0	1	0	0	0	1	0	0	1	0	0	0	0	1	1	0	1	0	0	0
	314	M00912	NAD biosynthesis, tryptophan => quinolinate => NAD	map00760	Nicotinate and nicotinamide metabolism	---	---	---	nadC, QPRT	nicotinate-nucleotide pyrophosphorylase (carboxylating) [EC:2.4.2.19]	ec:2.4.2.19	K00767	---	---	1	1	1	0	1	0	1	0	1	0	1	1	1	1	0	0	0	2	0	1	0	1	1	0	0	1	1	1	1	0	1	1	1	1	1
	315	M00912	NAD biosynthesis, tryptophan => quinolinate => NAD	map01100	Metabolic pathways	---	---	---	nadC, QPRT	nicotinate-nucleotide pyrophosphorylase (carboxylating) [EC:2.4.2.19]	ec:2.4.2.19	K00767	---	---	1	1	1	0	1	0	1	0	1	0	1	1	1	1	0	0	0	2	0	1	0	1	1	0	0	1	1	1	1	0	1	1	1	1	1
	316	M00912	NAD biosynthesis, tryptophan => quinolinate => NAD	map01240	Biosynthesis of cofactors	---	---	---	nadC, QPRT	nicotinate-nucleotide pyrophosphorylase (carboxylating) [EC:2.4.2.19]	ec:2.4.2.19	K00767	---	---	1	1	1	0	1	0	1	0	1	0	1	1	1	1	0	0	0	2	0	1	0	1	1	0	0	1	1	1	1	0	1	1	1	1	1
	317	M00912	NAD biosynthesis, tryptophan => quinolinate => NAD	map00760	Nicotinate and nicotinamide metabolism	---	---	---	E6.3.5.1, NADSYN1, QNS1, nadE	NAD+ synthase (glutamine-hydrolysing) [EC:6.3.5.1]	ec:6.3.5.1	K01950	---	---	0	1	1	0	0	1	1	0	1	0	1	0	0	0	0	0	0	1	0	1	0	0	1	0	0	0	1	0	0	0	1	0	1	0	0
	318	M00912	NAD biosynthesis, tryptophan => quinolinate => NAD	map01100	Metabolic pathways	---	---	---	E6.3.5.1, NADSYN1, QNS1, nadE	NAD+ synthase (glutamine-hydrolysing) [EC:6.3.5.1]	ec:6.3.5.1	K01950	---	---	0	1	1	0	0	1	1	0	1	0	1	0	0	0	0	0	0	1	0	1	0	0	1	0	0	0	1	0	0	0	1	0	1	0	0
	319	M00912	NAD biosynthesis, tryptophan => quinolinate => NAD	map01240	Biosynthesis of cofactors	---	---	---	E6.3.5.1, NADSYN1, QNS1, nadE	NAD+ synthase (glutamine-hydrolysing) [EC:6.3.5.1]	ec:6.3.5.1	K01950	---	---	0	1	1	0	0	1	1	0	1	0	1	0	0	0	0	0	0	1	0	1	0	0	1	0	0	0	1	0	0	0	1	0	1	0	0
	320	M00912	NAD biosynthesis, tryptophan => quinolinate => NAD	map00380	Tryptophan metabolism	---	---	---	KYNU, kynU	kynureninase [EC:3.7.1.3]	ec:3.7.1.3	K01556	---	---	0	0	0	1	1	0	0	1	0	1	2	0	1	1	1	0	0	0	1	0	1	1	0	1	1	1	0	1	2	1	0	1	0	1	1
	321	M00912	NAD biosynthesis, tryptophan => quinolinate => NAD	map01100	Metabolic pathways	---	---	---	KYNU, kynU	kynureninase [EC:3.7.1.3]	ec:3.7.1.3	K01556	---	---	0	0	0	1	1	0	0	1	0	1	2	0	1	1	1	0	0	0	1	0	1	1	0	1	1	1	0	1	2	1	0	1	0	1	1
	322	M00912	NAD biosynthesis, tryptophan => quinolinate => NAD	map01240	Biosynthesis of cofactors	---	---	---	KYNU, kynU	kynureninase [EC:3.7.1.3]	ec:3.7.1.3	K01556	---	---	0	0	0	1	1	0	0	1	0	1	2	0	1	1	1	0	0	0	1	0	1	1	0	1	1	1	0	1	2	1	0	1	0	1	1
	323	M00912	NAD biosynthesis, tryptophan => quinolinate => NAD	map00380	Tryptophan metabolism	---	---	---	TDO2, kynA	tryptophan 2,3-dioxygenase [EC:1.13.11.11]	ec:1.13.11.11	K00453	---	---	0	0	0	1	0	0	0	0	0	1	0	0	0	1	1	0	0	0	1	0	1	1	0	1	1	1	0	1	1	1	0	1	0	1	1
	324	M00912	NAD biosynthesis, tryptophan => quinolinate => NAD	map01100	Metabolic pathways	---	---	---	TDO2, kynA	tryptophan 2,3-dioxygenase [EC:1.13.11.11]	ec:1.13.11.11	K00453	---	---	0	0	0	1	0	0	0	0	0	1	0	0	0	1	1	0	0	0	1	0	1	1	0	1	1	1	0	1	1	1	0	1	0	1	1
	325	M00912	NAD biosynthesis, tryptophan => quinolinate => NAD	map01240	Biosynthesis of cofactors	---	---	---	TDO2, kynA	tryptophan 2,3-dioxygenase [EC:1.13.11.11]	ec:1.13.11.11	K00453	---	---	0	0	0	1	0	0	0	0	0	1	0	0	0	1	1	0	0	0	1	0	1	1	0	1	1	1	0	1	1	1	0	1	0	1	1
	326	M00912	NAD biosynthesis, tryptophan => quinolinate => NAD	map00380	Tryptophan metabolism	---	---	---	AFMID	arylformamidase [EC:3.5.1.9]	ec:3.5.1.9	K01432	---	---	0	0	0	1	0	0	0	0	0	0	0	0	0	2	1	0	0	0	0	0	1	2	0	1	0	0	0	0	0	1	0	0	0	2	2
	327	M00912	NAD biosynthesis, tryptophan => quinolinate => NAD	map00630	Glyoxylate and dicarboxylate metabolism	---	---	---	AFMID	arylformamidase [EC:3.5.1.9]	ec:3.5.1.9	K01432	---	---	0	0	0	1	0	0	0	0	0	0	0	0	0	2	1	0	0	0	0	0	1	2	0	1	0	0	0	0	0	1	0	0	0	2	2
	328	M00912	NAD biosynthesis, tryptophan => quinolinate => NAD	map01100	Metabolic pathways	---	---	---	AFMID	arylformamidase [EC:3.5.1.9]	ec:3.5.1.9	K01432	---	---	0	0	0	1	0	0	0	0	0	0	0	0	0	2	1	0	0	0	0	0	1	2	0	1	0	0	0	0	0	1	0	0	0	2	2
	329	M00912	NAD biosynthesis, tryptophan => quinolinate => NAD	map01240	Biosynthesis of cofactors	---	---	---	AFMID	arylformamidase [EC:3.5.1.9]	ec:3.5.1.9	K01432	---	---	0	0	0	1	0	0	0	0	0	0	0	0	0	2	1	0	0	0	0	0	1	2	0	1	0	0	0	0	0	1	0	0	0	2	2
	330	M00912	NAD biosynthesis, tryptophan => quinolinate => NAD	map00380	Tryptophan metabolism	---	---	---	IDO, INDO	indoleamine 2,3-dioxygenase [EC:1.13.11.52]	ec:1.13.11.52	K00463	---	---	0	0	0	0	1	0	0	0	0	0	0	0	0	0	0	0	0	0	0	0	0	0	0	0	0	0	0	0	0	0	0	0	0	0	0
	331	M00912	NAD biosynthesis, tryptophan => quinolinate => NAD	map01100	Metabolic pathways	---	---	---	IDO, INDO	indoleamine 2,3-dioxygenase [EC:1.13.11.52]	ec:1.13.11.52	K00463	---	---	0	0	0	0	1	0	0	0	0	0	0	0	0	0	0	0	0	0	0	0	0	0	0	0	0	0	0	0	0	0	0	0	0	0	0
	332	M00912	NAD biosynthesis, tryptophan => quinolinate => NAD	map01240	Biosynthesis of cofactors	---	---	---	IDO, INDO	indoleamine 2,3-dioxygenase [EC:1.13.11.52]	ec:1.13.11.52	K00463	---	---	0	0	0	0	1	0	0	0	0	0	0	0	0	0	0	0	0	0	0	0	0	0	0	0	0	0	0	0	0	0	0	0	0	0	0
	333	M00912	NAD biosynthesis, tryptophan => quinolinate => NAD	map05143	African trypanosomiasis	---	---	---	IDO, INDO	indoleamine 2,3-dioxygenase [EC:1.13.11.52]	ec:1.13.11.52	K00463	---	---	0	0	0	0	1	0	0	0	0	0	0	0	0	0	0	0	0	0	0	0	0	0	0	0	0	0	0	0	0	0	0	0	0	0	0
	334	M00912	NAD biosynthesis, tryptophan => quinolinate => NAD	map00380	Tryptophan metabolism	---	---	---	kynB	arylformamidase [EC:3.5.1.9]	ec:3.5.1.9	K07130	---	---	0	0	0	0	0	0	0	0	0	1	0	0	0	0	1	0	0	0	1	0	1	0	0	0	0	0	0	1	0	0	0	0	0	0	0
	335	M00912	NAD biosynthesis, tryptophan => quinolinate => NAD	map00630	Glyoxylate and dicarboxylate metabolism	---	---	---	kynB	arylformamidase [EC:3.5.1.9]	ec:3.5.1.9	K07130	---	---	0	0	0	0	0	0	0	0	0	1	0	0	0	0	1	0	0	0	1	0	1	0	0	0	0	0	0	1	0	0	0	0	0	0	0
	336	M00912	NAD biosynthesis, tryptophan => quinolinate => NAD	map01100	Metabolic pathways	---	---	---	kynB	arylformamidase [EC:3.5.1.9]	ec:3.5.1.9	K07130	---	---	0	0	0	0	0	0	0	0	0	1	0	0	0	0	1	0	0	0	1	0	1	0	0	0	0	0	0	1	0	0	0	0	0	0	0
	337	M00912	NAD biosynthesis, tryptophan => quinolinate => NAD	map01240	Biosynthesis of cofactors	---	---	---	kynB	arylformamidase [EC:3.5.1.9]	ec:3.5.1.9	K07130	---	---	0	0	0	0	0	0	0	0	0	1	0	0	0	0	1	0	0	0	1	0	1	0	0	0	0	0	0	1	0	0	0	0	0	0	0
	338	M00912	NAD biosynthesis, tryptophan => quinolinate => NAD	map00380	Tryptophan metabolism	---	---	---	HAAO	3-hydroxyanthranilate 3,4-dioxygenase [EC:1.13.11.6]	ec:1.13.11.6	K00452	---	---	0	0	0	0	0	0	0	0	0	1	0	0	0	0	1	0	0	0	1	0	1	0	0	0	0	1	0	1	0	0	0	0	0	0	0
	339	M00912	NAD biosynthesis, tryptophan => quinolinate => NAD	map01100	Metabolic pathways	---	---	---	HAAO	3-hydroxyanthranilate 3,4-dioxygenase [EC:1.13.11.6]	ec:1.13.11.6	K00452	---	---	0	0	0	0	0	0	0	0	0	1	0	0	0	0	1	0	0	0	1	0	1	0	0	0	0	1	0	1	0	0	0	0	0	0	0
	340	M00912	NAD biosynthesis, tryptophan => quinolinate => NAD	map01240	Biosynthesis of cofactors	---	---	---	HAAO	3-hydroxyanthranilate 3,4-dioxygenase [EC:1.13.11.6]	ec:1.13.11.6	K00452	---	---	0	0	0	0	0	0	0	0	0	1	0	0	0	0	1	0	0	0	1	0	1	0	0	0	0	1	0	1	0	0	0	0	0	0	0
	341	M00912	NAD biosynthesis, tryptophan => quinolinate => NAD	map00380	Tryptophan metabolism	---	---	---	KMO	kynurenine 3-monooxygenase [EC:1.14.13.9]	ec:1.14.13.9	K00486	---	---	0	0	0	0	0	0	0	0	0	0	0	0	0	0	0	0	0	0	1	0	0	0	0	0	0	1	0	1	0	0	0	0	0	0	0
	342	M00912	NAD biosynthesis, tryptophan => quinolinate => NAD	map01100	Metabolic pathways	---	---	---	KMO	kynurenine 3-monooxygenase [EC:1.14.13.9]	ec:1.14.13.9	K00486	---	---	0	0	0	0	0	0	0	0	0	0	0	0	0	0	0	0	0	0	1	0	0	0	0	0	0	1	0	1	0	0	0	0	0	0	0
	343	M00912	NAD biosynthesis, tryptophan => quinolinate => NAD	map01240	Biosynthesis of cofactors	---	---	---	KMO	kynurenine 3-monooxygenase [EC:1.14.13.9]	ec:1.14.13.9	K00486	---	---	0	0	0	0	0	0	0	0	0	0	0	0	0	0	0	0	0	0	1	0	0	0	0	0	0	1	0	1	0	0	0	0	0	0	0
	344	M00911	Riboflavin biosynthesis, fungi, GTP => riboflavin/FMN/FAD	map00740	Riboflavin metabolism	---	---	---	ribA, RIB1	GTP cyclohydrolase II [EC:3.5.4.25]	ec:3.5.4.25	K01497	---	---	1	1	0	1	0	1	1	0	0	0	1	0	0	1	1	1	1	1	0	0	1	1	1	1	0	0	1	0	1	2	0	1	1	1	1
	345	M00911	Riboflavin biosynthesis, fungi, GTP => riboflavin/FMN/FAD	map00790	Folate biosynthesis	---	---	---	ribA, RIB1	GTP cyclohydrolase II [EC:3.5.4.25]	ec:3.5.4.25	K01497	---	---	1	1	0	1	0	1	1	0	0	0	1	0	0	1	1	1	1	1	0	0	1	1	1	1	0	0	1	0	1	2	0	1	1	1	1
	346	M00911	Riboflavin biosynthesis, fungi, GTP => riboflavin/FMN/FAD	map01100	Metabolic pathways	---	---	---	ribA, RIB1	GTP cyclohydrolase II [EC:3.5.4.25]	ec:3.5.4.25	K01497	---	---	1	1	0	1	0	1	1	0	0	0	1	0	0	1	1	1	1	1	0	0	1	1	1	1	0	0	1	0	1	2	0	1	1	1	1
	347	M00911	Riboflavin biosynthesis, fungi, GTP => riboflavin/FMN/FAD	map01110	Biosynthesis of secondary metabolites	---	---	---	ribA, RIB1	GTP cyclohydrolase II [EC:3.5.4.25]	ec:3.5.4.25	K01497	---	---	1	1	0	1	0	1	1	0	0	0	1	0	0	1	1	1	1	1	0	0	1	1	1	1	0	0	1	0	1	2	0	1	1	1	1
	348	M00911	Riboflavin biosynthesis, fungi, GTP => riboflavin/FMN/FAD	map01240	Biosynthesis of cofactors	---	---	---	ribA, RIB1	GTP cyclohydrolase II [EC:3.5.4.25]	ec:3.5.4.25	K01497	---	---	1	1	0	1	0	1	1	0	0	0	1	0	0	1	1	1	1	1	0	0	1	1	1	1	0	0	1	0	1	2	0	1	1	1	1
	349	M00911	Riboflavin biosynthesis, fungi, GTP => riboflavin/FMN/FAD	map02024	Quorum sensing	---	---	---	ribA, RIB1	GTP cyclohydrolase II [EC:3.5.4.25]	ec:3.5.4.25	K01497	---	---	1	1	0	1	0	1	1	0	0	0	1	0	0	1	1	1	1	1	0	0	1	1	1	1	0	0	1	0	1	2	0	1	1	1	1
	350	M00911	Riboflavin biosynthesis, fungi, GTP => riboflavin/FMN/FAD	map00740	Riboflavin metabolism	---	---	---	ribH, RIB4	6,7-dimethyl-8-ribityllumazine synthase [EC:2.5.1.78]	ec:2.5.1.78	K00794	---	---	2	1	1	2	1	1	2	0	1	1	1	1	0	2	2	1	2	1	1	2	2	2	3	2	2	1	2	1	1	2	1	1	1	2	2
	351	M00911	Riboflavin biosynthesis, fungi, GTP => riboflavin/FMN/FAD	map01100	Metabolic pathways	---	---	---	ribH, RIB4	6,7-dimethyl-8-ribityllumazine synthase [EC:2.5.1.78]	ec:2.5.1.78	K00794	---	---	2	1	1	2	1	1	2	0	1	1	1	1	0	2	2	1	2	1	1	2	2	2	3	2	2	1	2	1	1	2	1	1	1	2	2
	352	M00911	Riboflavin biosynthesis, fungi, GTP => riboflavin/FMN/FAD	map01110	Biosynthesis of secondary metabolites	---	---	---	ribH, RIB4	6,7-dimethyl-8-ribityllumazine synthase [EC:2.5.1.78]	ec:2.5.1.78	K00794	---	---	2	1	1	2	1	1	2	0	1	1	1	1	0	2	2	1	2	1	1	2	2	2	3	2	2	1	2	1	1	2	1	1	1	2	2
	353	M00911	Riboflavin biosynthesis, fungi, GTP => riboflavin/FMN/FAD	map01240	Biosynthesis of cofactors	---	---	---	ribH, RIB4	6,7-dimethyl-8-ribityllumazine synthase [EC:2.5.1.78]	ec:2.5.1.78	K00794	---	---	2	1	1	2	1	1	2	0	1	1	1	1	0	2	2	1	2	1	1	2	2	2	3	2	2	1	2	1	1	2	1	1	1	2	2
	354	M00911	Riboflavin biosynthesis, fungi, GTP => riboflavin/FMN/FAD	map00740	Riboflavin metabolism	---	---	---	ribE, RIB5	riboflavin synthase [EC:2.5.1.9]	ec:2.5.1.9	K00793	---	---	1	1	1	1	1	2	2	1	1	1	2	1	0	1	1	1	1	1	1	3	1	1	3	1	1	1	2	1	1	1	1	1	1	1	1
	355	M00911	Riboflavin biosynthesis, fungi, GTP => riboflavin/FMN/FAD	map01100	Metabolic pathways	---	---	---	ribE, RIB5	riboflavin synthase [EC:2.5.1.9]	ec:2.5.1.9	K00793	---	---	1	1	1	1	1	2	2	1	1	1	2	1	0	1	1	1	1	1	1	3	1	1	3	1	1	1	2	1	1	1	1	1	1	1	1
	356	M00911	Riboflavin biosynthesis, fungi, GTP => riboflavin/FMN/FAD	map01110	Biosynthesis of secondary metabolites	---	---	---	ribE, RIB5	riboflavin synthase [EC:2.5.1.9]	ec:2.5.1.9	K00793	---	---	1	1	1	1	1	2	2	1	1	1	2	1	0	1	1	1	1	1	1	3	1	1	3	1	1	1	2	1	1	1	1	1	1	1	1
	357	M00911	Riboflavin biosynthesis, fungi, GTP => riboflavin/FMN/FAD	map01240	Biosynthesis of cofactors	---	---	---	ribE, RIB5	riboflavin synthase [EC:2.5.1.9]	ec:2.5.1.9	K00793	---	---	1	1	1	1	1	2	2	1	1	1	2	1	0	1	1	1	1	1	1	3	1	1	3	1	1	1	2	1	1	1	1	1	1	1	1
	358	M00911	Riboflavin biosynthesis, fungi, GTP => riboflavin/FMN/FAD	map00740	Riboflavin metabolism	---	---	---	ribB, RIB3	3,4-dihydroxy 2-butanone 4-phosphate synthase [EC:4.1.99.12]	ec:4.1.99.12	K02858	---	---	0	0	0	0	0	0	0	0	0	0	0	0	0	0	0	0	0	0	0	0	0	0	0	0	0	0	0	0	0	0	0	1	0	0	0
	359	M00911	Riboflavin biosynthesis, fungi, GTP => riboflavin/FMN/FAD	map01100	Metabolic pathways	---	---	---	ribB, RIB3	3,4-dihydroxy 2-butanone 4-phosphate synthase [EC:4.1.99.12]	ec:4.1.99.12	K02858	---	---	0	0	0	0	0	0	0	0	0	0	0	0	0	0	0	0	0	0	0	0	0	0	0	0	0	0	0	0	0	0	0	1	0	0	0
	360	M00911	Riboflavin biosynthesis, fungi, GTP => riboflavin/FMN/FAD	map01110	Biosynthesis of secondary metabolites	---	---	---	ribB, RIB3	3,4-dihydroxy 2-butanone 4-phosphate synthase [EC:4.1.99.12]	ec:4.1.99.12	K02858	---	---	0	0	0	0	0	0	0	0	0	0	0	0	0	0	0	0	0	0	0	0	0	0	0	0	0	0	0	0	0	0	0	1	0	0	0
	361	M00911	Riboflavin biosynthesis, fungi, GTP => riboflavin/FMN/FAD	map01240	Biosynthesis of cofactors	---	---	---	ribB, RIB3	3,4-dihydroxy 2-butanone 4-phosphate synthase [EC:4.1.99.12]	ec:4.1.99.12	K02858	---	---	0	0	0	0	0	0	0	0	0	0	0	0	0	0	0	0	0	0	0	0	0	0	0	0	0	0	0	0	0	0	0	1	0	0	0
	362	M00909	UDP-N-acetyl-D-glucosamine biosynthesis, prokaryotes, glucose => UDP-GlcNAc	map00520	Amino sugar and nucleotide sugar metabolism	---	---	---	glmM	phosphoglucosamine mutase [EC:5.4.2.10]	ec:5.4.2.10	K03431	---	---	1	1	1	1	1	1	1	0	1	0	1	1	1	2	1	0	1	1	0	1	1	2	1	1	1	0	1	0	1	1	1	2	1	1	1
	363	M00909	UDP-N-acetyl-D-glucosamine biosynthesis, prokaryotes, glucose => UDP-GlcNAc	map01100	Metabolic pathways	---	---	---	glmM	phosphoglucosamine mutase [EC:5.4.2.10]	ec:5.4.2.10	K03431	---	---	1	1	1	1	1	1	1	0	1	0	1	1	1	2	1	0	1	1	0	1	1	2	1	1	1	0	1	0	1	1	1	2	1	1	1
	364	M00909	UDP-N-acetyl-D-glucosamine biosynthesis, prokaryotes, glucose => UDP-GlcNAc	map00250	Alanine, aspartate and glutamate metabolism	---	---	---	glmS, GFPT	glutamine---fructose-6-phosphate transaminase (isomerizing) [EC:2.6.1.16]	ec:2.6.1.16	K00820	---	---	1	1	1	1	1	1	1	1	1	1	2	1	1	1	2	1	1	1	1	1	2	1	1	1	1	1	1	1	1	1	1	2	1	1	1
	365	M00909	UDP-N-acetyl-D-glucosamine biosynthesis, prokaryotes, glucose => UDP-GlcNAc	map00520	Amino sugar and nucleotide sugar metabolism	---	---	---	glmS, GFPT	glutamine---fructose-6-phosphate transaminase (isomerizing) [EC:2.6.1.16]	ec:2.6.1.16	K00820	---	---	1	1	1	1	1	1	1	1	1	1	2	1	1	1	2	1	1	1	1	1	2	1	1	1	1	1	1	1	1	1	1	2	1	1	1
	366	M00909	UDP-N-acetyl-D-glucosamine biosynthesis, prokaryotes, glucose => UDP-GlcNAc	map01100	Metabolic pathways	---	---	---	glmS, GFPT	glutamine---fructose-6-phosphate transaminase (isomerizing) [EC:2.6.1.16]	ec:2.6.1.16	K00820	---	---	1	1	1	1	1	1	1	1	1	1	2	1	1	1	2	1	1	1	1	1	2	1	1	1	1	1	1	1	1	1	1	2	1	1	1
	367	M00909	UDP-N-acetyl-D-glucosamine biosynthesis, prokaryotes, glucose => UDP-GlcNAc	map04931	Insulin resistance	---	---	---	glmS, GFPT	glutamine---fructose-6-phosphate transaminase (isomerizing) [EC:2.6.1.16]	ec:2.6.1.16	K00820	---	---	1	1	1	1	1	1	1	1	1	1	2	1	1	1	2	1	1	1	1	1	2	1	1	1	1	1	1	1	1	1	1	2	1	1	1
	368	M00909	UDP-N-acetyl-D-glucosamine biosynthesis, prokaryotes, glucose => UDP-GlcNAc	map05415	Diabetic cardiomyopathy	---	---	---	glmS, GFPT	glutamine---fructose-6-phosphate transaminase (isomerizing) [EC:2.6.1.16]	ec:2.6.1.16	K00820	---	---	1	1	1	1	1	1	1	1	1	1	2	1	1	1	2	1	1	1	1	1	2	1	1	1	1	1	1	1	1	1	1	2	1	1	1
	369	M00909	UDP-N-acetyl-D-glucosamine biosynthesis, prokaryotes, glucose => UDP-GlcNAc	map00520	Amino sugar and nucleotide sugar metabolism	---	---	---	glmU	bifunctional UDP-N-acetylglucosamine pyrophosphorylase / glucosamine-1-phosphate N-acetyltransferase [EC:2.7.7.23 2.3.1.157]	ec:2.7.7.23	K04042	---	---	1	1	1	1	1	1	1	1	1	0	1	1	1	1	1	0	1	1	0	1	1	1	1	1	0	0	1	0	1	1	1	1	1	1	1
	370	M00909	UDP-N-acetyl-D-glucosamine biosynthesis, prokaryotes, glucose => UDP-GlcNAc	map00520	Amino sugar and nucleotide sugar metabolism	---	---	---	glmU	bifunctional UDP-N-acetylglucosamine pyrophosphorylase / glucosamine-1-phosphate N-acetyltransferase [EC:2.7.7.23 2.3.1.157]	ec:2.3.1.157	K04042	---	---	1	1	1	1	1	1	1	1	1	0	1	1	1	1	1	0	1	1	0	1	1	1	1	1	0	0	1	0	1	1	1	1	1	1	1
	371	M00909	UDP-N-acetyl-D-glucosamine biosynthesis, prokaryotes, glucose => UDP-GlcNAc	map00541	O-Antigen nucleotide sugar biosynthesis	---	---	---	glmU	bifunctional UDP-N-acetylglucosamine pyrophosphorylase / glucosamine-1-phosphate N-acetyltransferase [EC:2.7.7.23 2.3.1.157]	ec:2.7.7.23	K04042	---	---	1	1	1	1	1	1	1	1	1	0	1	1	1	1	1	0	1	1	0	1	1	1	1	1	0	0	1	0	1	1	1	1	1	1	1
	372	M00909	UDP-N-acetyl-D-glucosamine biosynthesis, prokaryotes, glucose => UDP-GlcNAc	map00541	O-Antigen nucleotide sugar biosynthesis	---	---	---	glmU	bifunctional UDP-N-acetylglucosamine pyrophosphorylase / glucosamine-1-phosphate N-acetyltransferase [EC:2.7.7.23 2.3.1.157]	ec:2.3.1.157	K04042	---	---	1	1	1	1	1	1	1	1	1	0	1	1	1	1	1	0	1	1	0	1	1	1	1	1	0	0	1	0	1	1	1	1	1	1	1
	373	M00909	UDP-N-acetyl-D-glucosamine biosynthesis, prokaryotes, glucose => UDP-GlcNAc	map01100	Metabolic pathways	---	---	---	glmU	bifunctional UDP-N-acetylglucosamine pyrophosphorylase / glucosamine-1-phosphate N-acetyltransferase [EC:2.7.7.23 2.3.1.157]	ec:2.7.7.23	K04042	---	---	1	1	1	1	1	1	1	1	1	0	1	1	1	1	1	0	1	1	0	1	1	1	1	1	0	0	1	0	1	1	1	1	1	1	1
	374	M00909	UDP-N-acetyl-D-glucosamine biosynthesis, prokaryotes, glucose => UDP-GlcNAc	map01100	Metabolic pathways	---	---	---	glmU	bifunctional UDP-N-acetylglucosamine pyrophosphorylase / glucosamine-1-phosphate N-acetyltransferase [EC:2.7.7.23 2.3.1.157]	ec:2.3.1.157	K04042	---	---	1	1	1	1	1	1	1	1	1	0	1	1	1	1	1	0	1	1	0	1	1	1	1	1	0	0	1	0	1	1	1	1	1	1	1
	375	M00909	UDP-N-acetyl-D-glucosamine biosynthesis, prokaryotes, glucose => UDP-GlcNAc	map00010	Glycolysis / Gluconeogenesis	Central metabolism	Glycolysis (Embden-Meyerhof pathway), glucose => pyruvate	GPI, pgi; glucose-6-phosphate isomerase [EC:5.3.1.9]	GPI, pgi	glucose-6-phosphate isomerase [EC:5.3.1.9]	ec:5.3.1.9	K01810	---	---	1	2	1	1	1	1	1	1	1	1	1	1	0	1	1	1	1	2	1	1	1	1	1	1	0	1	1	1	1	1	1	1	2	1	1
	376	M00909	UDP-N-acetyl-D-glucosamine biosynthesis, prokaryotes, glucose => UDP-GlcNAc	map00030	Pentose phosphate pathway	Central metabolism	Glycolysis (Embden-Meyerhof pathway), glucose => pyruvate	GPI, pgi; glucose-6-phosphate isomerase [EC:5.3.1.9]	GPI, pgi	glucose-6-phosphate isomerase [EC:5.3.1.9]	ec:5.3.1.9	K01810	---	---	1	2	1	1	1	1	1	1	1	1	1	1	0	1	1	1	1	2	1	1	1	1	1	1	0	1	1	1	1	1	1	1	2	1	1
	377	M00909	UDP-N-acetyl-D-glucosamine biosynthesis, prokaryotes, glucose => UDP-GlcNAc	map00500	Starch and sucrose metabolism	Central metabolism	Glycolysis (Embden-Meyerhof pathway), glucose => pyruvate	GPI, pgi; glucose-6-phosphate isomerase [EC:5.3.1.9]	GPI, pgi	glucose-6-phosphate isomerase [EC:5.3.1.9]	ec:5.3.1.9	K01810	---	---	1	2	1	1	1	1	1	1	1	1	1	1	0	1	1	1	1	2	1	1	1	1	1	1	0	1	1	1	1	1	1	1	2	1	1
	378	M00909	UDP-N-acetyl-D-glucosamine biosynthesis, prokaryotes, glucose => UDP-GlcNAc	map00520	Amino sugar and nucleotide sugar metabolism	Central metabolism	Glycolysis (Embden-Meyerhof pathway), glucose => pyruvate	GPI, pgi; glucose-6-phosphate isomerase [EC:5.3.1.9]	GPI, pgi	glucose-6-phosphate isomerase [EC:5.3.1.9]	ec:5.3.1.9	K01810	---	---	1	2	1	1	1	1	1	1	1	1	1	1	0	1	1	1	1	2	1	1	1	1	1	1	0	1	1	1	1	1	1	1	2	1	1
	379	M00909	UDP-N-acetyl-D-glucosamine biosynthesis, prokaryotes, glucose => UDP-GlcNAc	map01100	Metabolic pathways	Central metabolism	Glycolysis (Embden-Meyerhof pathway), glucose => pyruvate	GPI, pgi; glucose-6-phosphate isomerase [EC:5.3.1.9]	GPI, pgi	glucose-6-phosphate isomerase [EC:5.3.1.9]	ec:5.3.1.9	K01810	---	---	1	2	1	1	1	1	1	1	1	1	1	1	0	1	1	1	1	2	1	1	1	1	1	1	0	1	1	1	1	1	1	1	2	1	1
	380	M00909	UDP-N-acetyl-D-glucosamine biosynthesis, prokaryotes, glucose => UDP-GlcNAc	map01110	Biosynthesis of secondary metabolites	Central metabolism	Glycolysis (Embden-Meyerhof pathway), glucose => pyruvate	GPI, pgi; glucose-6-phosphate isomerase [EC:5.3.1.9]	GPI, pgi	glucose-6-phosphate isomerase [EC:5.3.1.9]	ec:5.3.1.9	K01810	---	---	1	2	1	1	1	1	1	1	1	1	1	1	0	1	1	1	1	2	1	1	1	1	1	1	0	1	1	1	1	1	1	1	2	1	1
	381	M00909	UDP-N-acetyl-D-glucosamine biosynthesis, prokaryotes, glucose => UDP-GlcNAc	map01120	Microbial metabolism in diverse environments	Central metabolism	Glycolysis (Embden-Meyerhof pathway), glucose => pyruvate	GPI, pgi; glucose-6-phosphate isomerase [EC:5.3.1.9]	GPI, pgi	glucose-6-phosphate isomerase [EC:5.3.1.9]	ec:5.3.1.9	K01810	---	---	1	2	1	1	1	1	1	1	1	1	1	1	0	1	1	1	1	2	1	1	1	1	1	1	0	1	1	1	1	1	1	1	2	1	1
	382	M00909	UDP-N-acetyl-D-glucosamine biosynthesis, prokaryotes, glucose => UDP-GlcNAc	map01200	Carbon metabolism	Central metabolism	Glycolysis (Embden-Meyerhof pathway), glucose => pyruvate	GPI, pgi; glucose-6-phosphate isomerase [EC:5.3.1.9]	GPI, pgi	glucose-6-phosphate isomerase [EC:5.3.1.9]	ec:5.3.1.9	K01810	---	---	1	2	1	1	1	1	1	1	1	1	1	1	0	1	1	1	1	2	1	1	1	1	1	1	0	1	1	1	1	1	1	1	2	1	1
	383	M00903	Fosfomycin biosynthesis, phosphoenolpyruvate => fosfomycin	map00440	Phosphonate and phosphinate metabolism	---	---	---	fom1	phosphoenolpyruvate phosphomutase / 2-hydroxyethylphosphonate cytidylyltransferase [EC:5.4.2.9 2.7.7.104]	ec:5.4.2.9	K23999	---	---	0	0	0	0	0	0	0	0	0	0	0	0	0	0	0	1	0	0	0	0	0	0	0	0	0	0	0	0	1	0	0	0	0	0	0
	384	M00903	Fosfomycin biosynthesis, phosphoenolpyruvate => fosfomycin	map00440	Phosphonate and phosphinate metabolism	---	---	---	fom1	phosphoenolpyruvate phosphomutase / 2-hydroxyethylphosphonate cytidylyltransferase [EC:5.4.2.9 2.7.7.104]	ec:2.7.7.104	K23999	---	---	0	0	0	0	0	0	0	0	0	0	0	0	0	0	0	1	0	0	0	0	0	0	0	0	0	0	0	0	1	0	0	0	0	0	0
	385	M00903	Fosfomycin biosynthesis, phosphoenolpyruvate => fosfomycin	map00998	Biosynthesis of various secondary metabolites - part 2	---	---	---	fom1	phosphoenolpyruvate phosphomutase / 2-hydroxyethylphosphonate cytidylyltransferase [EC:5.4.2.9 2.7.7.104]	ec:5.4.2.9	K23999	---	---	0	0	0	0	0	0	0	0	0	0	0	0	0	0	0	1	0	0	0	0	0	0	0	0	0	0	0	0	1	0	0	0	0	0	0
	386	M00903	Fosfomycin biosynthesis, phosphoenolpyruvate => fosfomycin	map00998	Biosynthesis of various secondary metabolites - part 2	---	---	---	fom1	phosphoenolpyruvate phosphomutase / 2-hydroxyethylphosphonate cytidylyltransferase [EC:5.4.2.9 2.7.7.104]	ec:2.7.7.104	K23999	---	---	0	0	0	0	0	0	0	0	0	0	0	0	0	0	0	1	0	0	0	0	0	0	0	0	0	0	0	0	1	0	0	0	0	0	0
	387	M00903	Fosfomycin biosynthesis, phosphoenolpyruvate => fosfomycin	map01100	Metabolic pathways	---	---	---	fom1	phosphoenolpyruvate phosphomutase / 2-hydroxyethylphosphonate cytidylyltransferase [EC:5.4.2.9 2.7.7.104]	ec:5.4.2.9	K23999	---	---	0	0	0	0	0	0	0	0	0	0	0	0	0	0	0	1	0	0	0	0	0	0	0	0	0	0	0	0	1	0	0	0	0	0	0
	388	M00903	Fosfomycin biosynthesis, phosphoenolpyruvate => fosfomycin	map01100	Metabolic pathways	---	---	---	fom1	phosphoenolpyruvate phosphomutase / 2-hydroxyethylphosphonate cytidylyltransferase [EC:5.4.2.9 2.7.7.104]	ec:2.7.7.104	K23999	---	---	0	0	0	0	0	0	0	0	0	0	0	0	0	0	0	1	0	0	0	0	0	0	0	0	0	0	0	0	1	0	0	0	0	0	0
	389	M00903	Fosfomycin biosynthesis, phosphoenolpyruvate => fosfomycin	map01110	Biosynthesis of secondary metabolites	---	---	---	fom1	phosphoenolpyruvate phosphomutase / 2-hydroxyethylphosphonate cytidylyltransferase [EC:5.4.2.9 2.7.7.104]	ec:5.4.2.9	K23999	---	---	0	0	0	0	0	0	0	0	0	0	0	0	0	0	0	1	0	0	0	0	0	0	0	0	0	0	0	0	1	0	0	0	0	0	0
	390	M00903	Fosfomycin biosynthesis, phosphoenolpyruvate => fosfomycin	map01110	Biosynthesis of secondary metabolites	---	---	---	fom1	phosphoenolpyruvate phosphomutase / 2-hydroxyethylphosphonate cytidylyltransferase [EC:5.4.2.9 2.7.7.104]	ec:2.7.7.104	K23999	---	---	0	0	0	0	0	0	0	0	0	0	0	0	0	0	0	1	0	0	0	0	0	0	0	0	0	0	0	0	1	0	0	0	0	0	0
	391	M00903	Fosfomycin biosynthesis, phosphoenolpyruvate => fosfomycin	map00440	Phosphonate and phosphinate metabolism	---	---	---	E4.1.1.82	phosphonopyruvate decarboxylase [EC:4.1.1.82]	ec:4.1.1.82	K09459	---	---	0	0	0	0	0	0	0	0	0	0	0	0	0	0	0	1	0	0	0	0	0	0	0	0	0	0	0	0	1	0	0	0	0	0	0
	392	M00903	Fosfomycin biosynthesis, phosphoenolpyruvate => fosfomycin	map00998	Biosynthesis of various secondary metabolites - part 2	---	---	---	E4.1.1.82	phosphonopyruvate decarboxylase [EC:4.1.1.82]	ec:4.1.1.82	K09459	---	---	0	0	0	0	0	0	0	0	0	0	0	0	0	0	0	1	0	0	0	0	0	0	0	0	0	0	0	0	1	0	0	0	0	0	0
	393	M00903	Fosfomycin biosynthesis, phosphoenolpyruvate => fosfomycin	map01100	Metabolic pathways	---	---	---	E4.1.1.82	phosphonopyruvate decarboxylase [EC:4.1.1.82]	ec:4.1.1.82	K09459	---	---	0	0	0	0	0	0	0	0	0	0	0	0	0	0	0	1	0	0	0	0	0	0	0	0	0	0	0	0	1	0	0	0	0	0	0
	394	M00903	Fosfomycin biosynthesis, phosphoenolpyruvate => fosfomycin	map01110	Biosynthesis of secondary metabolites	---	---	---	E4.1.1.82	phosphonopyruvate decarboxylase [EC:4.1.1.82]	ec:4.1.1.82	K09459	---	---	0	0	0	0	0	0	0	0	0	0	0	0	0	0	0	1	0	0	0	0	0	0	0	0	0	0	0	0	1	0	0	0	0	0	0
	395	M00903	Fosfomycin biosynthesis, phosphoenolpyruvate => fosfomycin	map01120	Microbial metabolism in diverse environments	---	---	---	E4.1.1.82	phosphonopyruvate decarboxylase [EC:4.1.1.82]	ec:4.1.1.82	K09459	---	---	0	0	0	0	0	0	0	0	0	0	0	0	0	0	0	1	0	0	0	0	0	0	0	0	0	0	0	0	1	0	0	0	0	0	0
	396	M00899	Thiamine salvage pathway, HMP/HET => TMP	map00730	Thiamine metabolism	---	---	---	thiE	thiamine-phosphate pyrophosphorylase [EC:2.5.1.3]	ec:2.5.1.3	K00788	---	---	1	1	1	0	1	0	0	0	1	1	0	1	1	1	2	0	1	1	1	1	2	1	0	0	1	0	0	1	0	1	1	1	1	1	1
	397	M00899	Thiamine salvage pathway, HMP/HET => TMP	map01100	Metabolic pathways	---	---	---	thiE	thiamine-phosphate pyrophosphorylase [EC:2.5.1.3]	ec:2.5.1.3	K00788	---	---	1	1	1	0	1	0	0	0	1	1	0	1	1	1	2	0	1	1	1	1	2	1	0	0	1	0	0	1	0	1	1	1	1	1	1
	398	M00899	Thiamine salvage pathway, HMP/HET => TMP	map01240	Biosynthesis of cofactors	---	---	---	thiE	thiamine-phosphate pyrophosphorylase [EC:2.5.1.3]	ec:2.5.1.3	K00788	---	---	1	1	1	0	1	0	0	0	1	1	0	1	1	1	2	0	1	1	1	1	2	1	0	0	1	0	0	1	0	1	1	1	1	1	1
	399	M00899	Thiamine salvage pathway, HMP/HET => TMP	map00730	Thiamine metabolism	---	---	---	thiD	hydroxymethylpyrimidine/phosphomethylpyrimidine kinase [EC:2.7.1.49 2.7.4.7]	ec:2.7.1.49	K00941	---	---	1	0	0	0	1	0	0	0	0	0	0	1	1	0	2	0	1	0	0	0	2	0	0	0	1	0	0	1	0	1	0	0	0	0	0
	400	M00899	Thiamine salvage pathway, HMP/HET => TMP	map00730	Thiamine metabolism	---	---	---	thiD	hydroxymethylpyrimidine/phosphomethylpyrimidine kinase [EC:2.7.1.49 2.7.4.7]	ec:2.7.4.7	K00941	---	---	1	0	0	0	1	0	0	0	0	0	0	1	1	0	2	0	1	0	0	0	2	0	0	0	1	0	0	1	0	1	0	0	0	0	0
	401	M00899	Thiamine salvage pathway, HMP/HET => TMP	map01100	Metabolic pathways	---	---	---	thiD	hydroxymethylpyrimidine/phosphomethylpyrimidine kinase [EC:2.7.1.49 2.7.4.7]	ec:2.7.1.49	K00941	---	---	1	0	0	0	1	0	0	0	0	0	0	1	1	0	2	0	1	0	0	0	2	0	0	0	1	0	0	1	0	1	0	0	0	0	0
	402	M00899	Thiamine salvage pathway, HMP/HET => TMP	map01100	Metabolic pathways	---	---	---	thiD	hydroxymethylpyrimidine/phosphomethylpyrimidine kinase [EC:2.7.1.49 2.7.4.7]	ec:2.7.4.7	K00941	---	---	1	0	0	0	1	0	0	0	0	0	0	1	1	0	2	0	1	0	0	0	2	0	0	0	1	0	0	1	0	1	0	0	0	0	0
	403	M00899	Thiamine salvage pathway, HMP/HET => TMP	map01240	Biosynthesis of cofactors	---	---	---	thiD	hydroxymethylpyrimidine/phosphomethylpyrimidine kinase [EC:2.7.1.49 2.7.4.7]	ec:2.7.1.49	K00941	---	---	1	0	0	0	1	0	0	0	0	0	0	1	1	0	2	0	1	0	0	0	2	0	0	0	1	0	0	1	0	1	0	0	0	0	0
	404	M00899	Thiamine salvage pathway, HMP/HET => TMP	map01240	Biosynthesis of cofactors	---	---	---	thiD	hydroxymethylpyrimidine/phosphomethylpyrimidine kinase [EC:2.7.1.49 2.7.4.7]	ec:2.7.4.7	K00941	---	---	1	0	0	0	1	0	0	0	0	0	0	1	1	0	2	0	1	0	0	0	2	0	0	0	1	0	0	1	0	1	0	0	0	0	0
	405	M00899	Thiamine salvage pathway, HMP/HET => TMP	map00730	Thiamine metabolism	---	---	---	thiDE	hydroxymethylpyrimidine kinase / phosphomethylpyrimidine kinase / thiamine-phosphate diphosphorylase [EC:2.7.1.49 2.7.4.7 2.5.1.3]	ec:2.7.1.49	K14153	---	---	0	0	0	0	0	0	1	0	0	0	0	0	0	0	0	0	0	0	0	0	0	0	0	0	0	0	1	0	0	0	0	1	0	0	0
	406	M00899	Thiamine salvage pathway, HMP/HET => TMP	map00730	Thiamine metabolism	---	---	---	thiDE	hydroxymethylpyrimidine kinase / phosphomethylpyrimidine kinase / thiamine-phosphate diphosphorylase [EC:2.7.1.49 2.7.4.7 2.5.1.3]	ec:2.7.4.7	K14153	---	---	0	0	0	0	0	0	1	0	0	0	0	0	0	0	0	0	0	0	0	0	0	0	0	0	0	0	1	0	0	0	0	1	0	0	0
	407	M00899	Thiamine salvage pathway, HMP/HET => TMP	map00730	Thiamine metabolism	---	---	---	thiDE	hydroxymethylpyrimidine kinase / phosphomethylpyrimidine kinase / thiamine-phosphate diphosphorylase [EC:2.7.1.49 2.7.4.7 2.5.1.3]	ec:2.5.1.3	K14153	---	---	0	0	0	0	0	0	1	0	0	0	0	0	0	0	0	0	0	0	0	0	0	0	0	0	0	0	1	0	0	0	0	1	0	0	0
	408	M00899	Thiamine salvage pathway, HMP/HET => TMP	map01100	Metabolic pathways	---	---	---	thiDE	hydroxymethylpyrimidine kinase / phosphomethylpyrimidine kinase / thiamine-phosphate diphosphorylase [EC:2.7.1.49 2.7.4.7 2.5.1.3]	ec:2.7.1.49	K14153	---	---	0	0	0	0	0	0	1	0	0	0	0	0	0	0	0	0	0	0	0	0	0	0	0	0	0	0	1	0	0	0	0	1	0	0	0
	409	M00899	Thiamine salvage pathway, HMP/HET => TMP	map01100	Metabolic pathways	---	---	---	thiDE	hydroxymethylpyrimidine kinase / phosphomethylpyrimidine kinase / thiamine-phosphate diphosphorylase [EC:2.7.1.49 2.7.4.7 2.5.1.3]	ec:2.7.4.7	K14153	---	---	0	0	0	0	0	0	1	0	0	0	0	0	0	0	0	0	0	0	0	0	0	0	0	0	0	0	1	0	0	0	0	1	0	0	0
	410	M00899	Thiamine salvage pathway, HMP/HET => TMP	map01100	Metabolic pathways	---	---	---	thiDE	hydroxymethylpyrimidine kinase / phosphomethylpyrimidine kinase / thiamine-phosphate diphosphorylase [EC:2.7.1.49 2.7.4.7 2.5.1.3]	ec:2.5.1.3	K14153	---	---	0	0	0	0	0	0	1	0	0	0	0	0	0	0	0	0	0	0	0	0	0	0	0	0	0	0	1	0	0	0	0	1	0	0	0
	411	M00899	Thiamine salvage pathway, HMP/HET => TMP	map01240	Biosynthesis of cofactors	---	---	---	thiDE	hydroxymethylpyrimidine kinase / phosphomethylpyrimidine kinase / thiamine-phosphate diphosphorylase [EC:2.7.1.49 2.7.4.7 2.5.1.3]	ec:2.7.1.49	K14153	---	---	0	0	0	0	0	0	1	0	0	0	0	0	0	0	0	0	0	0	0	0	0	0	0	0	0	0	1	0	0	0	0	1	0	0	0
	412	M00899	Thiamine salvage pathway, HMP/HET => TMP	map01240	Biosynthesis of cofactors	---	---	---	thiDE	hydroxymethylpyrimidine kinase / phosphomethylpyrimidine kinase / thiamine-phosphate diphosphorylase [EC:2.7.1.49 2.7.4.7 2.5.1.3]	ec:2.7.4.7	K14153	---	---	0	0	0	0	0	0	1	0	0	0	0	0	0	0	0	0	0	0	0	0	0	0	0	0	0	0	1	0	0	0	0	1	0	0	0
	413	M00899	Thiamine salvage pathway, HMP/HET => TMP	map01240	Biosynthesis of cofactors	---	---	---	thiDE	hydroxymethylpyrimidine kinase / phosphomethylpyrimidine kinase / thiamine-phosphate diphosphorylase [EC:2.7.1.49 2.7.4.7 2.5.1.3]	ec:2.5.1.3	K14153	---	---	0	0	0	0	0	0	1	0	0	0	0	0	0	0	0	0	0	0	0	0	0	0	0	0	0	0	1	0	0	0	0	1	0	0	0
	414	M00899	Thiamine salvage pathway, HMP/HET => TMP	map00730	Thiamine metabolism	---	---	---	thiM	hydroxyethylthiazole kinase [EC:2.7.1.50]	ec:2.7.1.50	K00878	---	---	0	0	0	0	0	0	0	0	0	0	0	0	0	0	1	0	0	0	0	0	1	0	0	0	0	0	0	1	0	0	0	0	0	0	0
	415	M00899	Thiamine salvage pathway, HMP/HET => TMP	map01100	Metabolic pathways	---	---	---	thiM	hydroxyethylthiazole kinase [EC:2.7.1.50]	ec:2.7.1.50	K00878	---	---	0	0	0	0	0	0	0	0	0	0	0	0	0	0	1	0	0	0	0	0	1	0	0	0	0	0	0	1	0	0	0	0	0	0	0
	416	M00899	Thiamine salvage pathway, HMP/HET => TMP	map01240	Biosynthesis of cofactors	---	---	---	thiM	hydroxyethylthiazole kinase [EC:2.7.1.50]	ec:2.7.1.50	K00878	---	---	0	0	0	0	0	0	0	0	0	0	0	0	0	0	1	0	0	0	0	0	1	0	0	0	0	0	0	1	0	0	0	0	0	0	0
	417	M00898	Thiamine biosynthesis, pyridoxal-5P => TMP/thiamine/TPP	map00730	Thiamine metabolism	---	---	---	thiN, TPK1, THI80	thiamine pyrophosphokinase [EC:2.7.6.2]	ec:2.7.6.2	K00949	---	---	1	0	0	1	0	0	0	1	0	1	0	0	0	1	1	0	1	0	1	0	1	1	0	1	0	0	0	0	0	1	0	0	0	1	1
	418	M00898	Thiamine biosynthesis, pyridoxal-5P => TMP/thiamine/TPP	map01100	Metabolic pathways	---	---	---	thiN, TPK1, THI80	thiamine pyrophosphokinase [EC:2.7.6.2]	ec:2.7.6.2	K00949	---	---	1	0	0	1	0	0	0	1	0	1	0	0	0	1	1	0	1	0	1	0	1	1	0	1	0	0	0	0	0	1	0	0	0	1	1
	419	M00898	Thiamine biosynthesis, pyridoxal-5P => TMP/thiamine/TPP	map01240	Biosynthesis of cofactors	---	---	---	thiN, TPK1, THI80	thiamine pyrophosphokinase [EC:2.7.6.2]	ec:2.7.6.2	K00949	---	---	1	0	0	1	0	0	0	1	0	1	0	0	0	1	1	0	1	0	1	0	1	1	0	1	0	0	0	0	0	1	0	0	0	1	1
	420	M00897	Thiamine biosynthesis, plants, AIR (+ NAD+) => TMP/thiamine/TPP	map00730	Thiamine metabolism	---	---	---	thiN, TPK1, THI80	thiamine pyrophosphokinase [EC:2.7.6.2]	ec:2.7.6.2	K00949	---	---	1	0	0	1	0	0	0	1	0	1	0	0	0	1	1	0	1	0	1	0	1	1	0	1	0	0	0	0	0	1	0	0	0	1	1
	421	M00897	Thiamine biosynthesis, plants, AIR (+ NAD+) => TMP/thiamine/TPP	map01100	Metabolic pathways	---	---	---	thiN, TPK1, THI80	thiamine pyrophosphokinase [EC:2.7.6.2]	ec:2.7.6.2	K00949	---	---	1	0	0	1	0	0	0	1	0	1	0	0	0	1	1	0	1	0	1	0	1	1	0	1	0	0	0	0	0	1	0	0	0	1	1
	422	M00897	Thiamine biosynthesis, plants, AIR (+ NAD+) => TMP/thiamine/TPP	map01240	Biosynthesis of cofactors	---	---	---	thiN, TPK1, THI80	thiamine pyrophosphokinase [EC:2.7.6.2]	ec:2.7.6.2	K00949	---	---	1	0	0	1	0	0	0	1	0	1	0	0	0	1	1	0	1	0	1	0	1	1	0	1	0	0	0	0	0	1	0	0	0	1	1
	423	M00897	Thiamine biosynthesis, plants, AIR (+ NAD+) => TMP/thiamine/TPP	map00730	Thiamine metabolism	---	---	---	thiC	phosphomethylpyrimidine synthase [EC:4.1.99.17]	ec:4.1.99.17	K03147	---	---	0	1	1	0	1	1	1	0	1	1	0	1	1	1	1	0	0	1	1	0	1	1	0	0	0	0	1	0	0	0	1	1	1	1	1
	424	M00897	Thiamine biosynthesis, plants, AIR (+ NAD+) => TMP/thiamine/TPP	map01100	Metabolic pathways	---	---	---	thiC	phosphomethylpyrimidine synthase [EC:4.1.99.17]	ec:4.1.99.17	K03147	---	---	0	1	1	0	1	1	1	0	1	1	0	1	1	1	1	0	0	1	1	0	1	1	0	0	0	0	1	0	0	0	1	1	1	1	1
	425	M00897	Thiamine biosynthesis, plants, AIR (+ NAD+) => TMP/thiamine/TPP	map01240	Biosynthesis of cofactors	---	---	---	thiC	phosphomethylpyrimidine synthase [EC:4.1.99.17]	ec:4.1.99.17	K03147	---	---	0	1	1	0	1	1	1	0	1	1	0	1	1	1	1	0	0	1	1	0	1	1	0	0	0	0	1	0	0	0	1	1	1	1	1
	426	M00897	Thiamine biosynthesis, plants, AIR (+ NAD+) => TMP/thiamine/TPP	map00730	Thiamine metabolism	---	---	---	thiDE	hydroxymethylpyrimidine kinase / phosphomethylpyrimidine kinase / thiamine-phosphate diphosphorylase [EC:2.7.1.49 2.7.4.7 2.5.1.3]	ec:2.7.1.49	K14153	---	---	0	0	0	0	0	0	1	0	0	0	0	0	0	0	0	0	0	0	0	0	0	0	0	0	0	0	1	0	0	0	0	1	0	0	0
	427	M00897	Thiamine biosynthesis, plants, AIR (+ NAD+) => TMP/thiamine/TPP	map00730	Thiamine metabolism	---	---	---	thiDE	hydroxymethylpyrimidine kinase / phosphomethylpyrimidine kinase / thiamine-phosphate diphosphorylase [EC:2.7.1.49 2.7.4.7 2.5.1.3]	ec:2.7.4.7	K14153	---	---	0	0	0	0	0	0	1	0	0	0	0	0	0	0	0	0	0	0	0	0	0	0	0	0	0	0	1	0	0	0	0	1	0	0	0
	428	M00897	Thiamine biosynthesis, plants, AIR (+ NAD+) => TMP/thiamine/TPP	map00730	Thiamine metabolism	---	---	---	thiDE	hydroxymethylpyrimidine kinase / phosphomethylpyrimidine kinase / thiamine-phosphate diphosphorylase [EC:2.7.1.49 2.7.4.7 2.5.1.3]	ec:2.5.1.3	K14153	---	---	0	0	0	0	0	0	1	0	0	0	0	0	0	0	0	0	0	0	0	0	0	0	0	0	0	0	1	0	0	0	0	1	0	0	0
	429	M00897	Thiamine biosynthesis, plants, AIR (+ NAD+) => TMP/thiamine/TPP	map01100	Metabolic pathways	---	---	---	thiDE	hydroxymethylpyrimidine kinase / phosphomethylpyrimidine kinase / thiamine-phosphate diphosphorylase [EC:2.7.1.49 2.7.4.7 2.5.1.3]	ec:2.7.1.49	K14153	---	---	0	0	0	0	0	0	1	0	0	0	0	0	0	0	0	0	0	0	0	0	0	0	0	0	0	0	1	0	0	0	0	1	0	0	0
	430	M00897	Thiamine biosynthesis, plants, AIR (+ NAD+) => TMP/thiamine/TPP	map01100	Metabolic pathways	---	---	---	thiDE	hydroxymethylpyrimidine kinase / phosphomethylpyrimidine kinase / thiamine-phosphate diphosphorylase [EC:2.7.1.49 2.7.4.7 2.5.1.3]	ec:2.7.4.7	K14153	---	---	0	0	0	0	0	0	1	0	0	0	0	0	0	0	0	0	0	0	0	0	0	0	0	0	0	0	1	0	0	0	0	1	0	0	0
	431	M00897	Thiamine biosynthesis, plants, AIR (+ NAD+) => TMP/thiamine/TPP	map01100	Metabolic pathways	---	---	---	thiDE	hydroxymethylpyrimidine kinase / phosphomethylpyrimidine kinase / thiamine-phosphate diphosphorylase [EC:2.7.1.49 2.7.4.7 2.5.1.3]	ec:2.5.1.3	K14153	---	---	0	0	0	0	0	0	1	0	0	0	0	0	0	0	0	0	0	0	0	0	0	0	0	0	0	0	1	0	0	0	0	1	0	0	0
	432	M00897	Thiamine biosynthesis, plants, AIR (+ NAD+) => TMP/thiamine/TPP	map01240	Biosynthesis of cofactors	---	---	---	thiDE	hydroxymethylpyrimidine kinase / phosphomethylpyrimidine kinase / thiamine-phosphate diphosphorylase [EC:2.7.1.49 2.7.4.7 2.5.1.3]	ec:2.7.1.49	K14153	---	---	0	0	0	0	0	0	1	0	0	0	0	0	0	0	0	0	0	0	0	0	0	0	0	0	0	0	1	0	0	0	0	1	0	0	0
	433	M00897	Thiamine biosynthesis, plants, AIR (+ NAD+) => TMP/thiamine/TPP	map01240	Biosynthesis of cofactors	---	---	---	thiDE	hydroxymethylpyrimidine kinase / phosphomethylpyrimidine kinase / thiamine-phosphate diphosphorylase [EC:2.7.1.49 2.7.4.7 2.5.1.3]	ec:2.7.4.7	K14153	---	---	0	0	0	0	0	0	1	0	0	0	0	0	0	0	0	0	0	0	0	0	0	0	0	0	0	0	1	0	0	0	0	1	0	0	0
	434	M00897	Thiamine biosynthesis, plants, AIR (+ NAD+) => TMP/thiamine/TPP	map01240	Biosynthesis of cofactors	---	---	---	thiDE	hydroxymethylpyrimidine kinase / phosphomethylpyrimidine kinase / thiamine-phosphate diphosphorylase [EC:2.7.1.49 2.7.4.7 2.5.1.3]	ec:2.5.1.3	K14153	---	---	0	0	0	0	0	0	1	0	0	0	0	0	0	0	0	0	0	0	0	0	0	0	0	0	0	0	1	0	0	0	0	1	0	0	0
	435	M00896	Thiamine biosynthesis, archaea, AIR (+ NAD+) => TMP/TPP	map00730	Thiamine metabolism	---	---	---	thiE	thiamine-phosphate pyrophosphorylase [EC:2.5.1.3]	ec:2.5.1.3	K00788	---	---	1	1	1	0	1	0	0	0	1	1	0	1	1	1	2	0	1	1	1	1	2	1	0	0	1	0	0	1	0	1	1	1	1	1	1
	436	M00896	Thiamine biosynthesis, archaea, AIR (+ NAD+) => TMP/TPP	map01100	Metabolic pathways	---	---	---	thiE	thiamine-phosphate pyrophosphorylase [EC:2.5.1.3]	ec:2.5.1.3	K00788	---	---	1	1	1	0	1	0	0	0	1	1	0	1	1	1	2	0	1	1	1	1	2	1	0	0	1	0	0	1	0	1	1	1	1	1	1
	437	M00896	Thiamine biosynthesis, archaea, AIR (+ NAD+) => TMP/TPP	map01240	Biosynthesis of cofactors	---	---	---	thiE	thiamine-phosphate pyrophosphorylase [EC:2.5.1.3]	ec:2.5.1.3	K00788	---	---	1	1	1	0	1	0	0	0	1	1	0	1	1	1	2	0	1	1	1	1	2	1	0	0	1	0	0	1	0	1	1	1	1	1	1
	438	M00896	Thiamine biosynthesis, archaea, AIR (+ NAD+) => TMP/TPP	map00730	Thiamine metabolism	---	---	---	thiD	hydroxymethylpyrimidine/phosphomethylpyrimidine kinase [EC:2.7.1.49 2.7.4.7]	ec:2.7.1.49	K00941	---	---	1	0	0	0	1	0	0	0	0	0	0	1	1	0	2	0	1	0	0	0	2	0	0	0	1	0	0	1	0	1	0	0	0	0	0
	439	M00896	Thiamine biosynthesis, archaea, AIR (+ NAD+) => TMP/TPP	map00730	Thiamine metabolism	---	---	---	thiD	hydroxymethylpyrimidine/phosphomethylpyrimidine kinase [EC:2.7.1.49 2.7.4.7]	ec:2.7.4.7	K00941	---	---	1	0	0	0	1	0	0	0	0	0	0	1	1	0	2	0	1	0	0	0	2	0	0	0	1	0	0	1	0	1	0	0	0	0	0
	440	M00896	Thiamine biosynthesis, archaea, AIR (+ NAD+) => TMP/TPP	map01100	Metabolic pathways	---	---	---	thiD	hydroxymethylpyrimidine/phosphomethylpyrimidine kinase [EC:2.7.1.49 2.7.4.7]	ec:2.7.1.49	K00941	---	---	1	0	0	0	1	0	0	0	0	0	0	1	1	0	2	0	1	0	0	0	2	0	0	0	1	0	0	1	0	1	0	0	0	0	0
	441	M00896	Thiamine biosynthesis, archaea, AIR (+ NAD+) => TMP/TPP	map01100	Metabolic pathways	---	---	---	thiD	hydroxymethylpyrimidine/phosphomethylpyrimidine kinase [EC:2.7.1.49 2.7.4.7]	ec:2.7.4.7	K00941	---	---	1	0	0	0	1	0	0	0	0	0	0	1	1	0	2	0	1	0	0	0	2	0	0	0	1	0	0	1	0	1	0	0	0	0	0
	442	M00896	Thiamine biosynthesis, archaea, AIR (+ NAD+) => TMP/TPP	map01240	Biosynthesis of cofactors	---	---	---	thiD	hydroxymethylpyrimidine/phosphomethylpyrimidine kinase [EC:2.7.1.49 2.7.4.7]	ec:2.7.1.49	K00941	---	---	1	0	0	0	1	0	0	0	0	0	0	1	1	0	2	0	1	0	0	0	2	0	0	0	1	0	0	1	0	1	0	0	0	0	0
	443	M00896	Thiamine biosynthesis, archaea, AIR (+ NAD+) => TMP/TPP	map01240	Biosynthesis of cofactors	---	---	---	thiD	hydroxymethylpyrimidine/phosphomethylpyrimidine kinase [EC:2.7.1.49 2.7.4.7]	ec:2.7.4.7	K00941	---	---	1	0	0	0	1	0	0	0	0	0	0	1	1	0	2	0	1	0	0	0	2	0	0	0	1	0	0	1	0	1	0	0	0	0	0
	444	M00896	Thiamine biosynthesis, archaea, AIR (+ NAD+) => TMP/TPP	map00730	Thiamine metabolism	---	---	---	thiL	thiamine-monophosphate kinase [EC:2.7.4.16]	ec:2.7.4.16	K00946	---	---	0	1	1	0	1	1	1	0	1	1	1	1	0	0	0	1	0	1	1	2	0	0	2	0	0	1	1	1	1	0	1	1	1	0	0
	445	M00896	Thiamine biosynthesis, archaea, AIR (+ NAD+) => TMP/TPP	map01100	Metabolic pathways	---	---	---	thiL	thiamine-monophosphate kinase [EC:2.7.4.16]	ec:2.7.4.16	K00946	---	---	0	1	1	0	1	1	1	0	1	1	1	1	0	0	0	1	0	1	1	2	0	0	2	0	0	1	1	1	1	0	1	1	1	0	0
	446	M00896	Thiamine biosynthesis, archaea, AIR (+ NAD+) => TMP/TPP	map01240	Biosynthesis of cofactors	---	---	---	thiL	thiamine-monophosphate kinase [EC:2.7.4.16]	ec:2.7.4.16	K00946	---	---	0	1	1	0	1	1	1	0	1	1	1	1	0	0	0	1	0	1	1	2	0	0	2	0	0	1	1	1	1	0	1	1	1	0	0
	447	M00896	Thiamine biosynthesis, archaea, AIR (+ NAD+) => TMP/TPP	map00730	Thiamine metabolism	---	---	---	thiC	phosphomethylpyrimidine synthase [EC:4.1.99.17]	ec:4.1.99.17	K03147	---	---	0	1	1	0	1	1	1	0	1	1	0	1	1	1	1	0	0	1	1	0	1	1	0	0	0	0	1	0	0	0	1	1	1	1	1
	448	M00896	Thiamine biosynthesis, archaea, AIR (+ NAD+) => TMP/TPP	map01100	Metabolic pathways	---	---	---	thiC	phosphomethylpyrimidine synthase [EC:4.1.99.17]	ec:4.1.99.17	K03147	---	---	0	1	1	0	1	1	1	0	1	1	0	1	1	1	1	0	0	1	1	0	1	1	0	0	0	0	1	0	0	0	1	1	1	1	1
	449	M00896	Thiamine biosynthesis, archaea, AIR (+ NAD+) => TMP/TPP	map01240	Biosynthesis of cofactors	---	---	---	thiC	phosphomethylpyrimidine synthase [EC:4.1.99.17]	ec:4.1.99.17	K03147	---	---	0	1	1	0	1	1	1	0	1	1	0	1	1	1	1	0	0	1	1	0	1	1	0	0	0	0	1	0	0	0	1	1	1	1	1
	450	M00895	Thiamine biosynthesis, prokaryotes, AIR (+ DXP/glycine) => TMP/TPP	map00730	Thiamine metabolism	---	---	---	thiE	thiamine-phosphate pyrophosphorylase [EC:2.5.1.3]	ec:2.5.1.3	K00788	---	---	1	1	1	0	1	0	0	0	1	1	0	1	1	1	2	0	1	1	1	1	2	1	0	0	1	0	0	1	0	1	1	1	1	1	1
	451	M00895	Thiamine biosynthesis, prokaryotes, AIR (+ DXP/glycine) => TMP/TPP	map01100	Metabolic pathways	---	---	---	thiE	thiamine-phosphate pyrophosphorylase [EC:2.5.1.3]	ec:2.5.1.3	K00788	---	---	1	1	1	0	1	0	0	0	1	1	0	1	1	1	2	0	1	1	1	1	2	1	0	0	1	0	0	1	0	1	1	1	1	1	1
	452	M00895	Thiamine biosynthesis, prokaryotes, AIR (+ DXP/glycine) => TMP/TPP	map01240	Biosynthesis of cofactors	---	---	---	thiE	thiamine-phosphate pyrophosphorylase [EC:2.5.1.3]	ec:2.5.1.3	K00788	---	---	1	1	1	0	1	0	0	0	1	1	0	1	1	1	2	0	1	1	1	1	2	1	0	0	1	0	0	1	0	1	1	1	1	1	1
	453	M00895	Thiamine biosynthesis, prokaryotes, AIR (+ DXP/glycine) => TMP/TPP	map00730	Thiamine metabolism	Secretion system	Type IV Secretion	virB1; type IV secretion system protein VirB1	thiG	thiazole synthase [EC:2.8.1.10]	ec:2.8.1.10	K03149	---	---	1	1	1	0	1	1	1	0	1	1	0	1	0	1	1	0	1	1	1	1	1	1	0	0	1	0	1	0	0	1	1	1	1	1	1
	454	M00895	Thiamine biosynthesis, prokaryotes, AIR (+ DXP/glycine) => TMP/TPP	map01100	Metabolic pathways	Secretion system	Type IV Secretion	virB1; type IV secretion system protein VirB1	thiG	thiazole synthase [EC:2.8.1.10]	ec:2.8.1.10	K03149	---	---	1	1	1	0	1	1	1	0	1	1	0	1	0	1	1	0	1	1	1	1	1	1	0	0	1	0	1	0	0	1	1	1	1	1	1
	455	M00895	Thiamine biosynthesis, prokaryotes, AIR (+ DXP/glycine) => TMP/TPP	map01240	Biosynthesis of cofactors	Secretion system	Type IV Secretion	virB1; type IV secretion system protein VirB1	thiG	thiazole synthase [EC:2.8.1.10]	ec:2.8.1.10	K03149	---	---	1	1	1	0	1	1	1	0	1	1	0	1	0	1	1	0	1	1	1	1	1	1	0	0	1	0	1	0	0	1	1	1	1	1	1
	456	M00895	Thiamine biosynthesis, prokaryotes, AIR (+ DXP/glycine) => TMP/TPP	map04122	Sulfur relay system	---	---	---	thiS	sulfur carrier protein	---	K03154	---	---	1	1	1	0	1	1	1	0	1	1	0	1	0	1	1	0	1	1	1	1	1	1	0	0	1	0	1	0	0	1	1	1	1	1	1
	457	M00895	Thiamine biosynthesis, prokaryotes, AIR (+ DXP/glycine) => TMP/TPP	map00730	Thiamine metabolism	---	---	---	thiO	glycine oxidase [EC:1.4.3.19]	ec:1.4.3.19	K03153	---	---	1	0	1	0	1	1	1	0	0	0	0	1	1	1	1	0	1	0	0	1	0	1	0	0	1	0	1	0	0	1	1	0	0	1	1
	458	M00895	Thiamine biosynthesis, prokaryotes, AIR (+ DXP/glycine) => TMP/TPP	map01100	Metabolic pathways	---	---	---	thiO	glycine oxidase [EC:1.4.3.19]	ec:1.4.3.19	K03153	---	---	1	0	1	0	1	1	1	0	0	0	0	1	1	1	1	0	1	0	0	1	0	1	0	0	1	0	1	0	0	1	1	0	0	1	1
	459	M00895	Thiamine biosynthesis, prokaryotes, AIR (+ DXP/glycine) => TMP/TPP	map01240	Biosynthesis of cofactors	---	---	---	thiO	glycine oxidase [EC:1.4.3.19]	ec:1.4.3.19	K03153	---	---	1	0	1	0	1	1	1	0	0	0	0	1	1	1	1	0	1	0	0	1	0	1	0	0	1	0	1	0	0	1	1	0	0	1	1
	460	M00895	Thiamine biosynthesis, prokaryotes, AIR (+ DXP/glycine) => TMP/TPP	map00730	Thiamine metabolism	---	---	---	thiD	hydroxymethylpyrimidine/phosphomethylpyrimidine kinase [EC:2.7.1.49 2.7.4.7]	ec:2.7.1.49	K00941	---	---	1	0	0	0	1	0	0	0	0	0	0	1	1	0	2	0	1	0	0	0	2	0	0	0	1	0	0	1	0	1	0	0	0	0	0
	461	M00895	Thiamine biosynthesis, prokaryotes, AIR (+ DXP/glycine) => TMP/TPP	map00730	Thiamine metabolism	---	---	---	thiD	hydroxymethylpyrimidine/phosphomethylpyrimidine kinase [EC:2.7.1.49 2.7.4.7]	ec:2.7.4.7	K00941	---	---	1	0	0	0	1	0	0	0	0	0	0	1	1	0	2	0	1	0	0	0	2	0	0	0	1	0	0	1	0	1	0	0	0	0	0
	462	M00895	Thiamine biosynthesis, prokaryotes, AIR (+ DXP/glycine) => TMP/TPP	map01100	Metabolic pathways	---	---	---	thiD	hydroxymethylpyrimidine/phosphomethylpyrimidine kinase [EC:2.7.1.49 2.7.4.7]	ec:2.7.1.49	K00941	---	---	1	0	0	0	1	0	0	0	0	0	0	1	1	0	2	0	1	0	0	0	2	0	0	0	1	0	0	1	0	1	0	0	0	0	0
	463	M00895	Thiamine biosynthesis, prokaryotes, AIR (+ DXP/glycine) => TMP/TPP	map01100	Metabolic pathways	---	---	---	thiD	hydroxymethylpyrimidine/phosphomethylpyrimidine kinase [EC:2.7.1.49 2.7.4.7]	ec:2.7.4.7	K00941	---	---	1	0	0	0	1	0	0	0	0	0	0	1	1	0	2	0	1	0	0	0	2	0	0	0	1	0	0	1	0	1	0	0	0	0	0
	464	M00895	Thiamine biosynthesis, prokaryotes, AIR (+ DXP/glycine) => TMP/TPP	map01240	Biosynthesis of cofactors	---	---	---	thiD	hydroxymethylpyrimidine/phosphomethylpyrimidine kinase [EC:2.7.1.49 2.7.4.7]	ec:2.7.1.49	K00941	---	---	1	0	0	0	1	0	0	0	0	0	0	1	1	0	2	0	1	0	0	0	2	0	0	0	1	0	0	1	0	1	0	0	0	0	0
	465	M00895	Thiamine biosynthesis, prokaryotes, AIR (+ DXP/glycine) => TMP/TPP	map01240	Biosynthesis of cofactors	---	---	---	thiD	hydroxymethylpyrimidine/phosphomethylpyrimidine kinase [EC:2.7.1.49 2.7.4.7]	ec:2.7.4.7	K00941	---	---	1	0	0	0	1	0	0	0	0	0	0	1	1	0	2	0	1	0	0	0	2	0	0	0	1	0	0	1	0	1	0	0	0	0	0
	466	M00895	Thiamine biosynthesis, prokaryotes, AIR (+ DXP/glycine) => TMP/TPP	map00730	Thiamine metabolism	---	---	---	thiL	thiamine-monophosphate kinase [EC:2.7.4.16]	ec:2.7.4.16	K00946	---	---	0	1	1	0	1	1	1	0	1	1	1	1	0	0	0	1	0	1	1	2	0	0	2	0	0	1	1	1	1	0	1	1	1	0	0
	467	M00895	Thiamine biosynthesis, prokaryotes, AIR (+ DXP/glycine) => TMP/TPP	map01100	Metabolic pathways	---	---	---	thiL	thiamine-monophosphate kinase [EC:2.7.4.16]	ec:2.7.4.16	K00946	---	---	0	1	1	0	1	1	1	0	1	1	1	1	0	0	0	1	0	1	1	2	0	0	2	0	0	1	1	1	1	0	1	1	1	0	0
	468	M00895	Thiamine biosynthesis, prokaryotes, AIR (+ DXP/glycine) => TMP/TPP	map01240	Biosynthesis of cofactors	---	---	---	thiL	thiamine-monophosphate kinase [EC:2.7.4.16]	ec:2.7.4.16	K00946	---	---	0	1	1	0	1	1	1	0	1	1	1	1	0	0	0	1	0	1	1	2	0	0	2	0	0	1	1	1	1	0	1	1	1	0	0
	469	M00895	Thiamine biosynthesis, prokaryotes, AIR (+ DXP/glycine) => TMP/TPP	map00730	Thiamine metabolism	---	---	---	thiC	phosphomethylpyrimidine synthase [EC:4.1.99.17]	ec:4.1.99.17	K03147	---	---	0	1	1	0	1	1	1	0	1	1	0	1	1	1	1	0	0	1	1	0	1	1	0	0	0	0	1	0	0	0	1	1	1	1	1
	470	M00895	Thiamine biosynthesis, prokaryotes, AIR (+ DXP/glycine) => TMP/TPP	map01100	Metabolic pathways	---	---	---	thiC	phosphomethylpyrimidine synthase [EC:4.1.99.17]	ec:4.1.99.17	K03147	---	---	0	1	1	0	1	1	1	0	1	1	0	1	1	1	1	0	0	1	1	0	1	1	0	0	0	0	1	0	0	0	1	1	1	1	1
	471	M00895	Thiamine biosynthesis, prokaryotes, AIR (+ DXP/glycine) => TMP/TPP	map01240	Biosynthesis of cofactors	---	---	---	thiC	phosphomethylpyrimidine synthase [EC:4.1.99.17]	ec:4.1.99.17	K03147	---	---	0	1	1	0	1	1	1	0	1	1	0	1	1	1	1	0	0	1	1	0	1	1	0	0	0	0	1	0	0	0	1	1	1	1	1
	472	M00895	Thiamine biosynthesis, prokaryotes, AIR (+ DXP/glycine) => TMP/TPP	map00730	Thiamine metabolism	---	---	---	thiI	tRNA uracil 4-sulfurtransferase [EC:2.8.1.4]	ec:2.8.1.4	K03151	---	---	0	1	0	0	0	1	1	0	0	0	1	0	0	0	0	0	0	1	0	0	0	0	1	0	0	0	1	0	0	0	0	0	1	0	0
	473	M00895	Thiamine biosynthesis, prokaryotes, AIR (+ DXP/glycine) => TMP/TPP	map01100	Metabolic pathways	---	---	---	thiI	tRNA uracil 4-sulfurtransferase [EC:2.8.1.4]	ec:2.8.1.4	K03151	---	---	0	1	0	0	0	1	1	0	0	0	1	0	0	0	0	0	0	1	0	0	0	0	1	0	0	0	1	0	0	0	0	0	1	0	0
	474	M00895	Thiamine biosynthesis, prokaryotes, AIR (+ DXP/glycine) => TMP/TPP	map01240	Biosynthesis of cofactors	---	---	---	thiI	tRNA uracil 4-sulfurtransferase [EC:2.8.1.4]	ec:2.8.1.4	K03151	---	---	0	1	0	0	0	1	1	0	0	0	1	0	0	0	0	0	0	1	0	0	0	0	1	0	0	0	1	0	0	0	0	0	1	0	0
	475	M00895	Thiamine biosynthesis, prokaryotes, AIR (+ DXP/glycine) => TMP/TPP	map04122	Sulfur relay system	---	---	---	thiI	tRNA uracil 4-sulfurtransferase [EC:2.8.1.4]	ec:2.8.1.4	K03151	---	---	0	1	0	0	0	1	1	0	0	0	1	0	0	0	0	0	0	1	0	0	0	0	1	0	0	0	1	0	0	0	0	0	1	0	0
	476	M00892	UDP-N-acetyl-D-glucosamine biosynthesis, eukaryotes, glucose => UDP-GlcNAc	map00250	Alanine, aspartate and glutamate metabolism	---	---	---	glmS, GFPT	glutamine---fructose-6-phosphate transaminase (isomerizing) [EC:2.6.1.16]	ec:2.6.1.16	K00820	---	---	1	1	1	1	1	1	1	1	1	1	2	1	1	1	2	1	1	1	1	1	2	1	1	1	1	1	1	1	1	1	1	2	1	1	1
	477	M00892	UDP-N-acetyl-D-glucosamine biosynthesis, eukaryotes, glucose => UDP-GlcNAc	map00520	Amino sugar and nucleotide sugar metabolism	---	---	---	glmS, GFPT	glutamine---fructose-6-phosphate transaminase (isomerizing) [EC:2.6.1.16]	ec:2.6.1.16	K00820	---	---	1	1	1	1	1	1	1	1	1	1	2	1	1	1	2	1	1	1	1	1	2	1	1	1	1	1	1	1	1	1	1	2	1	1	1
	478	M00892	UDP-N-acetyl-D-glucosamine biosynthesis, eukaryotes, glucose => UDP-GlcNAc	map01100	Metabolic pathways	---	---	---	glmS, GFPT	glutamine---fructose-6-phosphate transaminase (isomerizing) [EC:2.6.1.16]	ec:2.6.1.16	K00820	---	---	1	1	1	1	1	1	1	1	1	1	2	1	1	1	2	1	1	1	1	1	2	1	1	1	1	1	1	1	1	1	1	2	1	1	1
	479	M00892	UDP-N-acetyl-D-glucosamine biosynthesis, eukaryotes, glucose => UDP-GlcNAc	map04931	Insulin resistance	---	---	---	glmS, GFPT	glutamine---fructose-6-phosphate transaminase (isomerizing) [EC:2.6.1.16]	ec:2.6.1.16	K00820	---	---	1	1	1	1	1	1	1	1	1	1	2	1	1	1	2	1	1	1	1	1	2	1	1	1	1	1	1	1	1	1	1	2	1	1	1
	480	M00892	UDP-N-acetyl-D-glucosamine biosynthesis, eukaryotes, glucose => UDP-GlcNAc	map05415	Diabetic cardiomyopathy	---	---	---	glmS, GFPT	glutamine---fructose-6-phosphate transaminase (isomerizing) [EC:2.6.1.16]	ec:2.6.1.16	K00820	---	---	1	1	1	1	1	1	1	1	1	1	2	1	1	1	2	1	1	1	1	1	2	1	1	1	1	1	1	1	1	1	1	2	1	1	1
	481	M00892	UDP-N-acetyl-D-glucosamine biosynthesis, eukaryotes, glucose => UDP-GlcNAc	map00010	Glycolysis / Gluconeogenesis	Central metabolism	Glycolysis (Embden-Meyerhof pathway), glucose => pyruvate	GPI, pgi; glucose-6-phosphate isomerase [EC:5.3.1.9]	GPI, pgi	glucose-6-phosphate isomerase [EC:5.3.1.9]	ec:5.3.1.9	K01810	---	---	1	2	1	1	1	1	1	1	1	1	1	1	0	1	1	1	1	2	1	1	1	1	1	1	0	1	1	1	1	1	1	1	2	1	1
	482	M00892	UDP-N-acetyl-D-glucosamine biosynthesis, eukaryotes, glucose => UDP-GlcNAc	map00030	Pentose phosphate pathway	Central metabolism	Glycolysis (Embden-Meyerhof pathway), glucose => pyruvate	GPI, pgi; glucose-6-phosphate isomerase [EC:5.3.1.9]	GPI, pgi	glucose-6-phosphate isomerase [EC:5.3.1.9]	ec:5.3.1.9	K01810	---	---	1	2	1	1	1	1	1	1	1	1	1	1	0	1	1	1	1	2	1	1	1	1	1	1	0	1	1	1	1	1	1	1	2	1	1
	483	M00892	UDP-N-acetyl-D-glucosamine biosynthesis, eukaryotes, glucose => UDP-GlcNAc	map00500	Starch and sucrose metabolism	Central metabolism	Glycolysis (Embden-Meyerhof pathway), glucose => pyruvate	GPI, pgi; glucose-6-phosphate isomerase [EC:5.3.1.9]	GPI, pgi	glucose-6-phosphate isomerase [EC:5.3.1.9]	ec:5.3.1.9	K01810	---	---	1	2	1	1	1	1	1	1	1	1	1	1	0	1	1	1	1	2	1	1	1	1	1	1	0	1	1	1	1	1	1	1	2	1	1
	484	M00892	UDP-N-acetyl-D-glucosamine biosynthesis, eukaryotes, glucose => UDP-GlcNAc	map00520	Amino sugar and nucleotide sugar metabolism	Central metabolism	Glycolysis (Embden-Meyerhof pathway), glucose => pyruvate	GPI, pgi; glucose-6-phosphate isomerase [EC:5.3.1.9]	GPI, pgi	glucose-6-phosphate isomerase [EC:5.3.1.9]	ec:5.3.1.9	K01810	---	---	1	2	1	1	1	1	1	1	1	1	1	1	0	1	1	1	1	2	1	1	1	1	1	1	0	1	1	1	1	1	1	1	2	1	1
	485	M00892	UDP-N-acetyl-D-glucosamine biosynthesis, eukaryotes, glucose => UDP-GlcNAc	map01100	Metabolic pathways	Central metabolism	Glycolysis (Embden-Meyerhof pathway), glucose => pyruvate	GPI, pgi; glucose-6-phosphate isomerase [EC:5.3.1.9]	GPI, pgi	glucose-6-phosphate isomerase [EC:5.3.1.9]	ec:5.3.1.9	K01810	---	---	1	2	1	1	1	1	1	1	1	1	1	1	0	1	1	1	1	2	1	1	1	1	1	1	0	1	1	1	1	1	1	1	2	1	1
	486	M00892	UDP-N-acetyl-D-glucosamine biosynthesis, eukaryotes, glucose => UDP-GlcNAc	map01110	Biosynthesis of secondary metabolites	Central metabolism	Glycolysis (Embden-Meyerhof pathway), glucose => pyruvate	GPI, pgi; glucose-6-phosphate isomerase [EC:5.3.1.9]	GPI, pgi	glucose-6-phosphate isomerase [EC:5.3.1.9]	ec:5.3.1.9	K01810	---	---	1	2	1	1	1	1	1	1	1	1	1	1	0	1	1	1	1	2	1	1	1	1	1	1	0	1	1	1	1	1	1	1	2	1	1
	487	M00892	UDP-N-acetyl-D-glucosamine biosynthesis, eukaryotes, glucose => UDP-GlcNAc	map01120	Microbial metabolism in diverse environments	Central metabolism	Glycolysis (Embden-Meyerhof pathway), glucose => pyruvate	GPI, pgi; glucose-6-phosphate isomerase [EC:5.3.1.9]	GPI, pgi	glucose-6-phosphate isomerase [EC:5.3.1.9]	ec:5.3.1.9	K01810	---	---	1	2	1	1	1	1	1	1	1	1	1	1	0	1	1	1	1	2	1	1	1	1	1	1	0	1	1	1	1	1	1	1	2	1	1
	488	M00892	UDP-N-acetyl-D-glucosamine biosynthesis, eukaryotes, glucose => UDP-GlcNAc	map01200	Carbon metabolism	Central metabolism	Glycolysis (Embden-Meyerhof pathway), glucose => pyruvate	GPI, pgi; glucose-6-phosphate isomerase [EC:5.3.1.9]	GPI, pgi	glucose-6-phosphate isomerase [EC:5.3.1.9]	ec:5.3.1.9	K01810	---	---	1	2	1	1	1	1	1	1	1	1	1	1	0	1	1	1	1	2	1	1	1	1	1	1	0	1	1	1	1	1	1	1	2	1	1
	489	M00884	Lipoic acid biosynthesis, octanoyl-CoA => dihydrolipoyl-E2	map00785	Lipoic acid metabolism	---	---	---	lipA, LIAS, LIP1, LIP5	lipoyl synthase [EC:2.8.1.8]	ec:2.8.1.8	K03644	---	---	1	1	1	1	1	1	1	0	1	1	1	1	0	1	1	1	1	1	1	1	1	1	1	1	0	1	1	1	1	1	1	1	1	1	1
	490	M00884	Lipoic acid biosynthesis, octanoyl-CoA => dihydrolipoyl-E2	map01100	Metabolic pathways	---	---	---	lipA, LIAS, LIP1, LIP5	lipoyl synthase [EC:2.8.1.8]	ec:2.8.1.8	K03644	---	---	1	1	1	1	1	1	1	0	1	1	1	1	0	1	1	1	1	1	1	1	1	1	1	1	0	1	1	1	1	1	1	1	1	1	1
	491	M00884	Lipoic acid biosynthesis, octanoyl-CoA => dihydrolipoyl-E2	map01240	Biosynthesis of cofactors	---	---	---	lipA, LIAS, LIP1, LIP5	lipoyl synthase [EC:2.8.1.8]	ec:2.8.1.8	K03644	---	---	1	1	1	1	1	1	1	0	1	1	1	1	0	1	1	1	1	1	1	1	1	1	1	1	0	1	1	1	1	1	1	1	1	1	1
	492	M00883	Lipoic acid biosynthesis, animals and bacteria, octanoyl-ACP => dihydrolipoyl-H => dihydrolipoyl-E2	map00785	Lipoic acid metabolism	---	---	---	lipA, LIAS, LIP1, LIP5	lipoyl synthase [EC:2.8.1.8]	ec:2.8.1.8	K03644	---	---	1	1	1	1	1	1	1	0	1	1	1	1	0	1	1	1	1	1	1	1	1	1	1	1	0	1	1	1	1	1	1	1	1	1	1
	493	M00883	Lipoic acid biosynthesis, animals and bacteria, octanoyl-ACP => dihydrolipoyl-H => dihydrolipoyl-E2	map01100	Metabolic pathways	---	---	---	lipA, LIAS, LIP1, LIP5	lipoyl synthase [EC:2.8.1.8]	ec:2.8.1.8	K03644	---	---	1	1	1	1	1	1	1	0	1	1	1	1	0	1	1	1	1	1	1	1	1	1	1	1	0	1	1	1	1	1	1	1	1	1	1
	494	M00883	Lipoic acid biosynthesis, animals and bacteria, octanoyl-ACP => dihydrolipoyl-H => dihydrolipoyl-E2	map01240	Biosynthesis of cofactors	---	---	---	lipA, LIAS, LIP1, LIP5	lipoyl synthase [EC:2.8.1.8]	ec:2.8.1.8	K03644	---	---	1	1	1	1	1	1	1	0	1	1	1	1	0	1	1	1	1	1	1	1	1	1	1	1	0	1	1	1	1	1	1	1	1	1	1
	495	M00882	Lipoic acid biosynthesis, eukaryotes, octanoyl-ACP => dihydrolipoyl-H	map00785	Lipoic acid metabolism	---	---	---	lipA, LIAS, LIP1, LIP5	lipoyl synthase [EC:2.8.1.8]	ec:2.8.1.8	K03644	---	---	1	1	1	1	1	1	1	0	1	1	1	1	0	1	1	1	1	1	1	1	1	1	1	1	0	1	1	1	1	1	1	1	1	1	1
	496	M00882	Lipoic acid biosynthesis, eukaryotes, octanoyl-ACP => dihydrolipoyl-H	map01100	Metabolic pathways	---	---	---	lipA, LIAS, LIP1, LIP5	lipoyl synthase [EC:2.8.1.8]	ec:2.8.1.8	K03644	---	---	1	1	1	1	1	1	1	0	1	1	1	1	0	1	1	1	1	1	1	1	1	1	1	1	0	1	1	1	1	1	1	1	1	1	1
	497	M00882	Lipoic acid biosynthesis, eukaryotes, octanoyl-ACP => dihydrolipoyl-H	map01240	Biosynthesis of cofactors	---	---	---	lipA, LIAS, LIP1, LIP5	lipoyl synthase [EC:2.8.1.8]	ec:2.8.1.8	K03644	---	---	1	1	1	1	1	1	1	0	1	1	1	1	0	1	1	1	1	1	1	1	1	1	1	1	0	1	1	1	1	1	1	1	1	1	1
	498	M00881	Lipoic acid biosynthesis, plants and bacteria, octanoyl-ACP => dihydrolipoyl-E2/H	map00785	Lipoic acid metabolism	---	---	---	lipA, LIAS, LIP1, LIP5	lipoyl synthase [EC:2.8.1.8]	ec:2.8.1.8	K03644	---	---	1	1	1	1	1	1	1	0	1	1	1	1	0	1	1	1	1	1	1	1	1	1	1	1	0	1	1	1	1	1	1	1	1	1	1
	499	M00881	Lipoic acid biosynthesis, plants and bacteria, octanoyl-ACP => dihydrolipoyl-E2/H	map01100	Metabolic pathways	---	---	---	lipA, LIAS, LIP1, LIP5	lipoyl synthase [EC:2.8.1.8]	ec:2.8.1.8	K03644	---	---	1	1	1	1	1	1	1	0	1	1	1	1	0	1	1	1	1	1	1	1	1	1	1	1	0	1	1	1	1	1	1	1	1	1	1
	500	M00881	Lipoic acid biosynthesis, plants and bacteria, octanoyl-ACP => dihydrolipoyl-E2/H	map01240	Biosynthesis of cofactors	---	---	---	lipA, LIAS, LIP1, LIP5	lipoyl synthase [EC:2.8.1.8]	ec:2.8.1.8	K03644	---	---	1	1	1	1	1	1	1	0	1	1	1	1	0	1	1	1	1	1	1	1	1	1	1	1	0	1	1	1	1	1	1	1	1	1	1
	501	M00881	Lipoic acid biosynthesis, plants and bacteria, octanoyl-ACP => dihydrolipoyl-E2/H	map00785	Lipoic acid metabolism	---	---	---	lipB	lipoyl(octanoyl) transferase [EC:2.3.1.181]	ec:2.3.1.181	K03801	---	---	1	1	1	1	1	1	0	1	1	0	1	1	1	1	1	1	1	1	1	1	1	1	0	1	0	1	1	1	1	1	1	1	1	1	1
	502	M00881	Lipoic acid biosynthesis, plants and bacteria, octanoyl-ACP => dihydrolipoyl-E2/H	map01100	Metabolic pathways	---	---	---	lipB	lipoyl(octanoyl) transferase [EC:2.3.1.181]	ec:2.3.1.181	K03801	---	---	1	1	1	1	1	1	0	1	1	0	1	1	1	1	1	1	1	1	1	1	1	1	0	1	0	1	1	1	1	1	1	1	1	1	1
	503	M00881	Lipoic acid biosynthesis, plants and bacteria, octanoyl-ACP => dihydrolipoyl-E2/H	map01240	Biosynthesis of cofactors	---	---	---	lipB	lipoyl(octanoyl) transferase [EC:2.3.1.181]	ec:2.3.1.181	K03801	---	---	1	1	1	1	1	1	0	1	1	0	1	1	1	1	1	1	1	1	1	1	1	1	0	1	0	1	1	1	1	1	1	1	1	1	1
	504	M00880	Molybdenum cofactor biosynthesis, GTP => molybdenum cofactor	map00790	Folate biosynthesis	---	---	---	MOCS2B, moaE	molybdopterin synthase catalytic subunit [EC:2.8.1.12]	ec:2.8.1.12	K03635	---	---	1	1	1	1	1	1	1	1	1	0	0	1	0	1	1	1	1	1	0	1	1	1	1	1	0	1	1	0	2	1	1	1	1	1	1
	505	M00880	Molybdenum cofactor biosynthesis, GTP => molybdenum cofactor	map01100	Metabolic pathways	---	---	---	MOCS2B, moaE	molybdopterin synthase catalytic subunit [EC:2.8.1.12]	ec:2.8.1.12	K03635	---	---	1	1	1	1	1	1	1	1	1	0	0	1	0	1	1	1	1	1	0	1	1	1	1	1	0	1	1	0	2	1	1	1	1	1	1
	506	M00880	Molybdenum cofactor biosynthesis, GTP => molybdenum cofactor	map01240	Biosynthesis of cofactors	---	---	---	MOCS2B, moaE	molybdopterin synthase catalytic subunit [EC:2.8.1.12]	ec:2.8.1.12	K03635	---	---	1	1	1	1	1	1	1	1	1	0	0	1	0	1	1	1	1	1	0	1	1	1	1	1	0	1	1	0	2	1	1	1	1	1	1
	507	M00880	Molybdenum cofactor biosynthesis, GTP => molybdenum cofactor	map04122	Sulfur relay system	---	---	---	MOCS2B, moaE	molybdopterin synthase catalytic subunit [EC:2.8.1.12]	ec:2.8.1.12	K03635	---	---	1	1	1	1	1	1	1	1	1	0	0	1	0	1	1	1	1	1	0	1	1	1	1	1	0	1	1	0	2	1	1	1	1	1	1
	508	M00880	Molybdenum cofactor biosynthesis, GTP => molybdenum cofactor	map00790	Folate biosynthesis	---	---	---	moaB	molybdopterin adenylyltransferase [EC:2.7.7.75]	ec:2.7.7.75	K03638	---	---	1	1	1	1	1	1	1	0	1	0	0	1	0	1	1	1	1	1	0	1	1	1	1	1	1	0	1	0	2	0	1	1	1	1	1
	509	M00880	Molybdenum cofactor biosynthesis, GTP => molybdenum cofactor	map01100	Metabolic pathways	---	---	---	moaB	molybdopterin adenylyltransferase [EC:2.7.7.75]	ec:2.7.7.75	K03638	---	---	1	1	1	1	1	1	1	0	1	0	0	1	0	1	1	1	1	1	0	1	1	1	1	1	1	0	1	0	2	0	1	1	1	1	1
	510	M00880	Molybdenum cofactor biosynthesis, GTP => molybdenum cofactor	map01240	Biosynthesis of cofactors	---	---	---	moaB	molybdopterin adenylyltransferase [EC:2.7.7.75]	ec:2.7.7.75	K03638	---	---	1	1	1	1	1	1	1	0	1	0	0	1	0	1	1	1	1	1	0	1	1	1	1	1	1	0	1	0	2	0	1	1	1	1	1
	511	M00880	Molybdenum cofactor biosynthesis, GTP => molybdenum cofactor	map04122	Sulfur relay system	---	---	---	moaB	molybdopterin adenylyltransferase [EC:2.7.7.75]	ec:2.7.7.75	K03638	---	---	1	1	1	1	1	1	1	0	1	0	0	1	0	1	1	1	1	1	0	1	1	1	1	1	1	0	1	0	2	0	1	1	1	1	1
	512	M00880	Molybdenum cofactor biosynthesis, GTP => molybdenum cofactor	map00790	Folate biosynthesis	---	---	---	moaA, CNX2	GTP 3',8-cyclase [EC:4.1.99.22]	ec:4.1.99.22	K03639	---	---	1	1	1	1	1	1	1	1	1	0	0	2	0	1	1	0	1	1	0	1	1	1	1	1	1	1	1	0	2	1	1	1	1	1	1
	513	M00880	Molybdenum cofactor biosynthesis, GTP => molybdenum cofactor	map01100	Metabolic pathways	---	---	---	moaA, CNX2	GTP 3',8-cyclase [EC:4.1.99.22]	ec:4.1.99.22	K03639	---	---	1	1	1	1	1	1	1	1	1	0	0	2	0	1	1	0	1	1	0	1	1	1	1	1	1	1	1	0	2	1	1	1	1	1	1
	514	M00880	Molybdenum cofactor biosynthesis, GTP => molybdenum cofactor	map01240	Biosynthesis of cofactors	---	---	---	moaA, CNX2	GTP 3',8-cyclase [EC:4.1.99.22]	ec:4.1.99.22	K03639	---	---	1	1	1	1	1	1	1	1	1	0	0	2	0	1	1	0	1	1	0	1	1	1	1	1	1	1	1	0	2	1	1	1	1	1	1
	515	M00880	Molybdenum cofactor biosynthesis, GTP => molybdenum cofactor	map04122	Sulfur relay system	---	---	---	moaA, CNX2	GTP 3',8-cyclase [EC:4.1.99.22]	ec:4.1.99.22	K03639	---	---	1	1	1	1	1	1	1	1	1	0	0	2	0	1	1	0	1	1	0	1	1	1	1	1	1	1	1	0	2	1	1	1	1	1	1
	516	M00880	Molybdenum cofactor biosynthesis, GTP => molybdenum cofactor	map00790	Folate biosynthesis	---	---	---	moaC, CNX3	cyclic pyranopterin monophosphate synthase [EC:4.6.1.17]	ec:4.6.1.17	K03637	---	---	1	1	1	1	1	1	1	1	1	0	0	1	0	1	1	1	1	1	0	1	1	1	1	1	1	1	1	0	2	1	1	1	1	1	1
	517	M00880	Molybdenum cofactor biosynthesis, GTP => molybdenum cofactor	map01100	Metabolic pathways	---	---	---	moaC, CNX3	cyclic pyranopterin monophosphate synthase [EC:4.6.1.17]	ec:4.6.1.17	K03637	---	---	1	1	1	1	1	1	1	1	1	0	0	1	0	1	1	1	1	1	0	1	1	1	1	1	1	1	1	0	2	1	1	1	1	1	1
	518	M00880	Molybdenum cofactor biosynthesis, GTP => molybdenum cofactor	map01240	Biosynthesis of cofactors	---	---	---	moaC, CNX3	cyclic pyranopterin monophosphate synthase [EC:4.6.1.17]	ec:4.6.1.17	K03637	---	---	1	1	1	1	1	1	1	1	1	0	0	1	0	1	1	1	1	1	0	1	1	1	1	1	1	1	1	0	2	1	1	1	1	1	1
	519	M00880	Molybdenum cofactor biosynthesis, GTP => molybdenum cofactor	map04122	Sulfur relay system	---	---	---	moaC, CNX3	cyclic pyranopterin monophosphate synthase [EC:4.6.1.17]	ec:4.6.1.17	K03637	---	---	1	1	1	1	1	1	1	1	1	0	0	1	0	1	1	1	1	1	0	1	1	1	1	1	1	1	1	0	2	1	1	1	1	1	1
	520	M00880	Molybdenum cofactor biosynthesis, GTP => molybdenum cofactor	map00790	Folate biosynthesis	---	---	---	moeA	molybdopterin molybdotransferase [EC:2.10.1.1]	ec:2.10.1.1	K03750	---	---	1	2	1	2	1	1	1	2	1	0	0	1	0	4	2	1	1	3	0	1	2	4	1	2	3	1	1	0	2	1	1	1	2	2	2
	521	M00880	Molybdenum cofactor biosynthesis, GTP => molybdenum cofactor	map01100	Metabolic pathways	---	---	---	moeA	molybdopterin molybdotransferase [EC:2.10.1.1]	ec:2.10.1.1	K03750	---	---	1	2	1	2	1	1	1	2	1	0	0	1	0	4	2	1	1	3	0	1	2	4	1	2	3	1	1	0	2	1	1	1	2	2	2
	522	M00880	Molybdenum cofactor biosynthesis, GTP => molybdenum cofactor	map01240	Biosynthesis of cofactors	---	---	---	moeA	molybdopterin molybdotransferase [EC:2.10.1.1]	ec:2.10.1.1	K03750	---	---	1	2	1	2	1	1	1	2	1	0	0	1	0	4	2	1	1	3	0	1	2	4	1	2	3	1	1	0	2	1	1	1	2	2	2
	523	M00880	Molybdenum cofactor biosynthesis, GTP => molybdenum cofactor	map00790	Folate biosynthesis	---	---	---	mogA	molybdopterin adenylyltransferase [EC:2.7.7.75]	ec:2.7.7.75	K03831	---	---	0	0	0	0	0	0	0	0	0	0	0	0	0	0	0	0	0	0	0	0	0	0	0	0	0	0	0	0	0	1	0	0	0	0	0
	524	M00880	Molybdenum cofactor biosynthesis, GTP => molybdenum cofactor	map01100	Metabolic pathways	---	---	---	mogA	molybdopterin adenylyltransferase [EC:2.7.7.75]	ec:2.7.7.75	K03831	---	---	0	0	0	0	0	0	0	0	0	0	0	0	0	0	0	0	0	0	0	0	0	0	0	0	0	0	0	0	0	1	0	0	0	0	0
	525	M00880	Molybdenum cofactor biosynthesis, GTP => molybdenum cofactor	map01240	Biosynthesis of cofactors	---	---	---	mogA	molybdopterin adenylyltransferase [EC:2.7.7.75]	ec:2.7.7.75	K03831	---	---	0	0	0	0	0	0	0	0	0	0	0	0	0	0	0	0	0	0	0	0	0	0	0	0	0	0	0	0	0	1	0	0	0	0	0
	526	M00880	Molybdenum cofactor biosynthesis, GTP => molybdenum cofactor	map04122	Sulfur relay system	---	---	---	mogA	molybdopterin adenylyltransferase [EC:2.7.7.75]	ec:2.7.7.75	K03831	---	---	0	0	0	0	0	0	0	0	0	0	0	0	0	0	0	0	0	0	0	0	0	0	0	0	0	0	0	0	0	1	0	0	0	0	0
	527	M00879	Arginine succinyltransferase pathway, arginine => glutamate	map00330	Arginine and proline metabolism	---	---	---	astE	succinylglutamate desuccinylase [EC:3.5.1.96]	ec:3.5.1.96	K05526	---	---	0	1	0	0	0	0	0	0	0	0	0	0	0	0	0	0	0	1	0	0	0	0	0	0	0	0	0	0	1	0	0	1	1	0	0
	528	M00879	Arginine succinyltransferase pathway, arginine => glutamate	map01100	Metabolic pathways	---	---	---	astE	succinylglutamate desuccinylase [EC:3.5.1.96]	ec:3.5.1.96	K05526	---	---	0	1	0	0	0	0	0	0	0	0	0	0	0	0	0	0	0	1	0	0	0	0	0	0	0	0	0	0	1	0	0	1	1	0	0
	529	M00879	Arginine succinyltransferase pathway, arginine => glutamate	map00330	Arginine and proline metabolism	---	---	---	astB	succinylarginine dihydrolase [EC:3.5.3.23]	ec:3.5.3.23	K01484	---	---	0	1	0	0	1	0	0	0	0	0	1	1	0	0	0	1	0	1	0	0	0	0	0	0	0	0	0	0	1	0	0	1	1	0	0
	530	M00879	Arginine succinyltransferase pathway, arginine => glutamate	map01100	Metabolic pathways	---	---	---	astB	succinylarginine dihydrolase [EC:3.5.3.23]	ec:3.5.3.23	K01484	---	---	0	1	0	0	1	0	0	0	0	0	1	1	0	0	0	1	0	1	0	0	0	0	0	0	0	0	0	0	1	0	0	1	1	0	0
	531	M00879	Arginine succinyltransferase pathway, arginine => glutamate	map00330	Arginine and proline metabolism	---	---	---	astD	succinylglutamic semialdehyde dehydrogenase [EC:1.2.1.71]	ec:1.2.1.71	K06447	---	---	0	1	0	0	1	0	0	0	0	0	1	1	0	0	0	1	0	1	0	0	0	0	0	0	0	0	0	0	1	0	0	1	1	0	0
	532	M00879	Arginine succinyltransferase pathway, arginine => glutamate	map01100	Metabolic pathways	---	---	---	astD	succinylglutamic semialdehyde dehydrogenase [EC:1.2.1.71]	ec:1.2.1.71	K06447	---	---	0	1	0	0	1	0	0	0	0	0	1	1	0	0	0	1	0	1	0	0	0	0	0	0	0	0	0	0	1	0	0	1	1	0	0
	533	M00879	Arginine succinyltransferase pathway, arginine => glutamate	map00330	Arginine and proline metabolism	---	---	---	astA	arginine N-succinyltransferase [EC:2.3.1.109]	ec:2.3.1.109	K00673	---	---	0	3	0	0	1	0	0	0	0	0	1	1	0	0	0	1	0	3	0	0	0	0	0	0	0	0	0	0	1	0	0	1	3	0	0
	534	M00879	Arginine succinyltransferase pathway, arginine => glutamate	map01100	Metabolic pathways	---	---	---	astA	arginine N-succinyltransferase [EC:2.3.1.109]	ec:2.3.1.109	K00673	---	---	0	3	0	0	1	0	0	0	0	0	1	1	0	0	0	1	0	3	0	0	0	0	0	0	0	0	0	0	1	0	0	1	3	0	0
	535	M00878	Phenylacetate degradation, phenylaxetate => acetyl-CoA/succinyl-CoA	map00360	Phenylalanine metabolism	---	---	---	paaH, hbd, fadB, mmgB	3-hydroxybutyryl-CoA dehydrogenase [EC:1.1.1.157]	ec:1.1.1.157	K00074	---	---	1	2	1	1	1	0	0	0	0	1	0	1	1	1	1	0	1	2	1	0	1	1	0	1	1	2	0	1	0	1	1	0	2	1	1
	536	M00878	Phenylacetate degradation, phenylaxetate => acetyl-CoA/succinyl-CoA	map00362	Benzoate degradation	---	---	---	paaH, hbd, fadB, mmgB	3-hydroxybutyryl-CoA dehydrogenase [EC:1.1.1.157]	ec:1.1.1.157	K00074	---	---	1	2	1	1	1	0	0	0	0	1	0	1	1	1	1	0	1	2	1	0	1	1	0	1	1	2	0	1	0	1	1	0	2	1	1
	537	M00878	Phenylacetate degradation, phenylaxetate => acetyl-CoA/succinyl-CoA	map00650	Butanoate metabolism	---	---	---	paaH, hbd, fadB, mmgB	3-hydroxybutyryl-CoA dehydrogenase [EC:1.1.1.157]	ec:1.1.1.157	K00074	---	---	1	2	1	1	1	0	0	0	0	1	0	1	1	1	1	0	1	2	1	0	1	1	0	1	1	2	0	1	0	1	1	0	2	1	1
	538	M00878	Phenylacetate degradation, phenylaxetate => acetyl-CoA/succinyl-CoA	map01100	Metabolic pathways	---	---	---	paaH, hbd, fadB, mmgB	3-hydroxybutyryl-CoA dehydrogenase [EC:1.1.1.157]	ec:1.1.1.157	K00074	---	---	1	2	1	1	1	0	0	0	0	1	0	1	1	1	1	0	1	2	1	0	1	1	0	1	1	2	0	1	0	1	1	0	2	1	1
	539	M00878	Phenylacetate degradation, phenylaxetate => acetyl-CoA/succinyl-CoA	map01120	Microbial metabolism in diverse environments	---	---	---	paaH, hbd, fadB, mmgB	3-hydroxybutyryl-CoA dehydrogenase [EC:1.1.1.157]	ec:1.1.1.157	K00074	---	---	1	2	1	1	1	0	0	0	0	1	0	1	1	1	1	0	1	2	1	0	1	1	0	1	1	2	0	1	0	1	1	0	2	1	1
	540	M00878	Phenylacetate degradation, phenylaxetate => acetyl-CoA/succinyl-CoA	map01200	Carbon metabolism	---	---	---	paaH, hbd, fadB, mmgB	3-hydroxybutyryl-CoA dehydrogenase [EC:1.1.1.157]	ec:1.1.1.157	K00074	---	---	1	2	1	1	1	0	0	0	0	1	0	1	1	1	1	0	1	2	1	0	1	1	0	1	1	2	0	1	0	1	1	0	2	1	1
	541	M00878	Phenylacetate degradation, phenylaxetate => acetyl-CoA/succinyl-CoA	map00071	Fatty acid degradation	---	---	---	paaF, echA	enoyl-CoA hydratase [EC:4.2.1.17]	ec:4.2.1.17	K01692	Hexadecane	Fatty acid-beta-oxidation	1	4	1	4	6	1	1	5	0	1	0	9	7	5	7	1	1	4	1	0	4	4	1	4	3	2	1	1	1	2	1	0	4	8	8
	542	M00878	Phenylacetate degradation, phenylaxetate => acetyl-CoA/succinyl-CoA	map00280	Valine, leucine and isoleucine degradation	---	---	---	paaF, echA	enoyl-CoA hydratase [EC:4.2.1.17]	ec:4.2.1.17	K01692	Hexadecane	Fatty acid-beta-oxidation	1	4	1	4	6	1	1	5	0	1	0	9	7	5	7	1	1	4	1	0	4	4	1	4	3	2	1	1	1	2	1	0	4	8	8
	543	M00878	Phenylacetate degradation, phenylaxetate => acetyl-CoA/succinyl-CoA	map00281	Geraniol degradation	---	---	---	paaF, echA	enoyl-CoA hydratase [EC:4.2.1.17]	ec:4.2.1.17	K01692	Hexadecane	Fatty acid-beta-oxidation	1	4	1	4	6	1	1	5	0	1	0	9	7	5	7	1	1	4	1	0	4	4	1	4	3	2	1	1	1	2	1	0	4	8	8
	544	M00878	Phenylacetate degradation, phenylaxetate => acetyl-CoA/succinyl-CoA	map00310	Lysine degradation	---	---	---	paaF, echA	enoyl-CoA hydratase [EC:4.2.1.17]	ec:4.2.1.17	K01692	Hexadecane	Fatty acid-beta-oxidation	1	4	1	4	6	1	1	5	0	1	0	9	7	5	7	1	1	4	1	0	4	4	1	4	3	2	1	1	1	2	1	0	4	8	8
	545	M00878	Phenylacetate degradation, phenylaxetate => acetyl-CoA/succinyl-CoA	map00360	Phenylalanine metabolism	---	---	---	paaF, echA	enoyl-CoA hydratase [EC:4.2.1.17]	ec:4.2.1.17	K01692	Hexadecane	Fatty acid-beta-oxidation	1	4	1	4	6	1	1	5	0	1	0	9	7	5	7	1	1	4	1	0	4	4	1	4	3	2	1	1	1	2	1	0	4	8	8
	546	M00878	Phenylacetate degradation, phenylaxetate => acetyl-CoA/succinyl-CoA	map00362	Benzoate degradation	---	---	---	paaF, echA	enoyl-CoA hydratase [EC:4.2.1.17]	ec:4.2.1.17	K01692	Hexadecane	Fatty acid-beta-oxidation	1	4	1	4	6	1	1	5	0	1	0	9	7	5	7	1	1	4	1	0	4	4	1	4	3	2	1	1	1	2	1	0	4	8	8
	547	M00878	Phenylacetate degradation, phenylaxetate => acetyl-CoA/succinyl-CoA	map00380	Tryptophan metabolism	---	---	---	paaF, echA	enoyl-CoA hydratase [EC:4.2.1.17]	ec:4.2.1.17	K01692	Hexadecane	Fatty acid-beta-oxidation	1	4	1	4	6	1	1	5	0	1	0	9	7	5	7	1	1	4	1	0	4	4	1	4	3	2	1	1	1	2	1	0	4	8	8
	548	M00878	Phenylacetate degradation, phenylaxetate => acetyl-CoA/succinyl-CoA	map00410	beta-Alanine metabolism	---	---	---	paaF, echA	enoyl-CoA hydratase [EC:4.2.1.17]	ec:4.2.1.17	K01692	Hexadecane	Fatty acid-beta-oxidation	1	4	1	4	6	1	1	5	0	1	0	9	7	5	7	1	1	4	1	0	4	4	1	4	3	2	1	1	1	2	1	0	4	8	8
	549	M00878	Phenylacetate degradation, phenylaxetate => acetyl-CoA/succinyl-CoA	map00627	Aminobenzoate degradation	---	---	---	paaF, echA	enoyl-CoA hydratase [EC:4.2.1.17]	ec:4.2.1.17	K01692	Hexadecane	Fatty acid-beta-oxidation	1	4	1	4	6	1	1	5	0	1	0	9	7	5	7	1	1	4	1	0	4	4	1	4	3	2	1	1	1	2	1	0	4	8	8
	550	M00878	Phenylacetate degradation, phenylaxetate => acetyl-CoA/succinyl-CoA	map00640	Propanoate metabolism	---	---	---	paaF, echA	enoyl-CoA hydratase [EC:4.2.1.17]	ec:4.2.1.17	K01692	Hexadecane	Fatty acid-beta-oxidation	1	4	1	4	6	1	1	5	0	1	0	9	7	5	7	1	1	4	1	0	4	4	1	4	3	2	1	1	1	2	1	0	4	8	8
	551	M00878	Phenylacetate degradation, phenylaxetate => acetyl-CoA/succinyl-CoA	map00650	Butanoate metabolism	---	---	---	paaF, echA	enoyl-CoA hydratase [EC:4.2.1.17]	ec:4.2.1.17	K01692	Hexadecane	Fatty acid-beta-oxidation	1	4	1	4	6	1	1	5	0	1	0	9	7	5	7	1	1	4	1	0	4	4	1	4	3	2	1	1	1	2	1	0	4	8	8
	552	M00878	Phenylacetate degradation, phenylaxetate => acetyl-CoA/succinyl-CoA	map00903	Limonene and pinene degradation	---	---	---	paaF, echA	enoyl-CoA hydratase [EC:4.2.1.17]	ec:4.2.1.17	K01692	Hexadecane	Fatty acid-beta-oxidation	1	4	1	4	6	1	1	5	0	1	0	9	7	5	7	1	1	4	1	0	4	4	1	4	3	2	1	1	1	2	1	0	4	8	8
	553	M00878	Phenylacetate degradation, phenylaxetate => acetyl-CoA/succinyl-CoA	map00930	Caprolactam degradation	---	---	---	paaF, echA	enoyl-CoA hydratase [EC:4.2.1.17]	ec:4.2.1.17	K01692	Hexadecane	Fatty acid-beta-oxidation	1	4	1	4	6	1	1	5	0	1	0	9	7	5	7	1	1	4	1	0	4	4	1	4	3	2	1	1	1	2	1	0	4	8	8
	554	M00878	Phenylacetate degradation, phenylaxetate => acetyl-CoA/succinyl-CoA	map01100	Metabolic pathways	---	---	---	paaF, echA	enoyl-CoA hydratase [EC:4.2.1.17]	ec:4.2.1.17	K01692	Hexadecane	Fatty acid-beta-oxidation	1	4	1	4	6	1	1	5	0	1	0	9	7	5	7	1	1	4	1	0	4	4	1	4	3	2	1	1	1	2	1	0	4	8	8
	555	M00878	Phenylacetate degradation, phenylaxetate => acetyl-CoA/succinyl-CoA	map01110	Biosynthesis of secondary metabolites	---	---	---	paaF, echA	enoyl-CoA hydratase [EC:4.2.1.17]	ec:4.2.1.17	K01692	Hexadecane	Fatty acid-beta-oxidation	1	4	1	4	6	1	1	5	0	1	0	9	7	5	7	1	1	4	1	0	4	4	1	4	3	2	1	1	1	2	1	0	4	8	8
	556	M00878	Phenylacetate degradation, phenylaxetate => acetyl-CoA/succinyl-CoA	map01120	Microbial metabolism in diverse environments	---	---	---	paaF, echA	enoyl-CoA hydratase [EC:4.2.1.17]	ec:4.2.1.17	K01692	Hexadecane	Fatty acid-beta-oxidation	1	4	1	4	6	1	1	5	0	1	0	9	7	5	7	1	1	4	1	0	4	4	1	4	3	2	1	1	1	2	1	0	4	8	8
	557	M00878	Phenylacetate degradation, phenylaxetate => acetyl-CoA/succinyl-CoA	map01212	Fatty acid metabolism	---	---	---	paaF, echA	enoyl-CoA hydratase [EC:4.2.1.17]	ec:4.2.1.17	K01692	Hexadecane	Fatty acid-beta-oxidation	1	4	1	4	6	1	1	5	0	1	0	9	7	5	7	1	1	4	1	0	4	4	1	4	3	2	1	1	1	2	1	0	4	8	8
	558	M00878	Phenylacetate degradation, phenylaxetate => acetyl-CoA/succinyl-CoA	map00360	Phenylalanine metabolism	---	---	---	paaG	2-(1,2-epoxy-1,2-dihydrophenyl)acetyl-CoA isomerase [EC:5.3.3.18]	ec:5.3.3.18	K15866	---	---	1	1	0	2	2	0	0	1	0	0	0	3	1	2	2	0	1	1	0	0	1	2	0	2	1	1	0	0	0	1	0	0	1	3	3
	559	M00878	Phenylacetate degradation, phenylaxetate => acetyl-CoA/succinyl-CoA	map01100	Metabolic pathways	---	---	---	paaG	2-(1,2-epoxy-1,2-dihydrophenyl)acetyl-CoA isomerase [EC:5.3.3.18]	ec:5.3.3.18	K15866	---	---	1	1	0	2	2	0	0	1	0	0	0	3	1	2	2	0	1	1	0	0	1	2	0	2	1	1	0	0	0	1	0	0	1	3	3
	560	M00878	Phenylacetate degradation, phenylaxetate => acetyl-CoA/succinyl-CoA	map01120	Microbial metabolism in diverse environments	---	---	---	paaG	2-(1,2-epoxy-1,2-dihydrophenyl)acetyl-CoA isomerase [EC:5.3.3.18]	ec:5.3.3.18	K15866	---	---	1	1	0	2	2	0	0	1	0	0	0	3	1	2	2	0	1	1	0	0	1	2	0	2	1	1	0	0	0	1	0	0	1	3	3
	561	M00878	Phenylacetate degradation, phenylaxetate => acetyl-CoA/succinyl-CoA	map00360	Phenylalanine metabolism	---	---	---	paaK	phenylacetate-CoA ligase [EC:6.2.1.30]	ec:6.2.1.30	K01912	---	---	0	2	0	2	0	0	2	1	0	2	0	0	0	2	2	0	0	2	2	0	2	2	1	2	2	2	0	1	0	1	0	0	2	2	2
	562	M00878	Phenylacetate degradation, phenylaxetate => acetyl-CoA/succinyl-CoA	map01100	Metabolic pathways	---	---	---	paaK	phenylacetate-CoA ligase [EC:6.2.1.30]	ec:6.2.1.30	K01912	---	---	0	2	0	2	0	0	2	1	0	2	0	0	0	2	2	0	0	2	2	0	2	2	1	2	2	2	0	1	0	1	0	0	2	2	2
	563	M00878	Phenylacetate degradation, phenylaxetate => acetyl-CoA/succinyl-CoA	map01120	Microbial metabolism in diverse environments	---	---	---	paaK	phenylacetate-CoA ligase [EC:6.2.1.30]	ec:6.2.1.30	K01912	---	---	0	2	0	2	0	0	2	1	0	2	0	0	0	2	2	0	0	2	2	0	2	2	1	2	2	2	0	1	0	1	0	0	2	2	2
	564	M00878	Phenylacetate degradation, phenylaxetate => acetyl-CoA/succinyl-CoA	map05111	Biofilm formation - Vibrio cholerae	---	---	---	paaK	phenylacetate-CoA ligase [EC:6.2.1.30]	ec:6.2.1.30	K01912	---	---	0	2	0	2	0	0	2	1	0	2	0	0	0	2	2	0	0	2	2	0	2	2	1	2	2	2	0	1	0	1	0	0	2	2	2
	565	M00878	Phenylacetate degradation, phenylaxetate => acetyl-CoA/succinyl-CoA	map00360	Phenylalanine metabolism	---	---	---	paaZ	oxepin-CoA hydrolase / 3-oxo-5,6-dehydrosuberyl-CoA semialdehyde dehydrogenase [EC:3.3.2.12 1.2.1.91]	ec:3.3.2.12	K02618	---	---	0	0	0	1	0	0	0	1	0	0	0	0	0	1	1	0	0	0	0	0	1	1	0	1	1	1	0	0	0	0	0	0	0	1	1
	566	M00878	Phenylacetate degradation, phenylaxetate => acetyl-CoA/succinyl-CoA	map00360	Phenylalanine metabolism	---	---	---	paaZ	oxepin-CoA hydrolase / 3-oxo-5,6-dehydrosuberyl-CoA semialdehyde dehydrogenase [EC:3.3.2.12 1.2.1.91]	ec:1.2.1.91	K02618	---	---	0	0	0	1	0	0	0	1	0	0	0	0	0	1	1	0	0	0	0	0	1	1	0	1	1	1	0	0	0	0	0	0	0	1	1
	567	M00878	Phenylacetate degradation, phenylaxetate => acetyl-CoA/succinyl-CoA	map01100	Metabolic pathways	---	---	---	paaZ	oxepin-CoA hydrolase / 3-oxo-5,6-dehydrosuberyl-CoA semialdehyde dehydrogenase [EC:3.3.2.12 1.2.1.91]	ec:3.3.2.12	K02618	---	---	0	0	0	1	0	0	0	1	0	0	0	0	0	1	1	0	0	0	0	0	1	1	0	1	1	1	0	0	0	0	0	0	0	1	1
	568	M00878	Phenylacetate degradation, phenylaxetate => acetyl-CoA/succinyl-CoA	map01100	Metabolic pathways	---	---	---	paaZ	oxepin-CoA hydrolase / 3-oxo-5,6-dehydrosuberyl-CoA semialdehyde dehydrogenase [EC:3.3.2.12 1.2.1.91]	ec:1.2.1.91	K02618	---	---	0	0	0	1	0	0	0	1	0	0	0	0	0	1	1	0	0	0	0	0	1	1	0	1	1	1	0	0	0	0	0	0	0	1	1
	569	M00878	Phenylacetate degradation, phenylaxetate => acetyl-CoA/succinyl-CoA	map01120	Microbial metabolism in diverse environments	---	---	---	paaZ	oxepin-CoA hydrolase / 3-oxo-5,6-dehydrosuberyl-CoA semialdehyde dehydrogenase [EC:3.3.2.12 1.2.1.91]	ec:3.3.2.12	K02618	---	---	0	0	0	1	0	0	0	1	0	0	0	0	0	1	1	0	0	0	0	0	1	1	0	1	1	1	0	0	0	0	0	0	0	1	1
	570	M00878	Phenylacetate degradation, phenylaxetate => acetyl-CoA/succinyl-CoA	map01120	Microbial metabolism in diverse environments	---	---	---	paaZ	oxepin-CoA hydrolase / 3-oxo-5,6-dehydrosuberyl-CoA semialdehyde dehydrogenase [EC:3.3.2.12 1.2.1.91]	ec:1.2.1.91	K02618	---	---	0	0	0	1	0	0	0	1	0	0	0	0	0	1	1	0	0	0	0	0	1	1	0	1	1	1	0	0	0	0	0	0	0	1	1
	571	M00878	Phenylacetate degradation, phenylaxetate => acetyl-CoA/succinyl-CoA	map00360	Phenylalanine metabolism	---	---	---	paaA	ring-1,2-phenylacetyl-CoA epoxidase subunit PaaA [EC:1.14.13.149]	ec:1.14.13.149	K02609	---	---	0	0	0	1	0	0	0	1	0	0	0	0	0	2	1	0	0	0	0	0	1	2	0	1	0	1	0	0	0	0	0	0	0	2	2
	572	M00878	Phenylacetate degradation, phenylaxetate => acetyl-CoA/succinyl-CoA	map01100	Metabolic pathways	---	---	---	paaA	ring-1,2-phenylacetyl-CoA epoxidase subunit PaaA [EC:1.14.13.149]	ec:1.14.13.149	K02609	---	---	0	0	0	1	0	0	0	1	0	0	0	0	0	2	1	0	0	0	0	0	1	2	0	1	0	1	0	0	0	0	0	0	0	2	2
	573	M00878	Phenylacetate degradation, phenylaxetate => acetyl-CoA/succinyl-CoA	map01120	Microbial metabolism in diverse environments	---	---	---	paaA	ring-1,2-phenylacetyl-CoA epoxidase subunit PaaA [EC:1.14.13.149]	ec:1.14.13.149	K02609	---	---	0	0	0	1	0	0	0	1	0	0	0	0	0	2	1	0	0	0	0	0	1	2	0	1	0	1	0	0	0	0	0	0	0	2	2
	574	M00878	Phenylacetate degradation, phenylaxetate => acetyl-CoA/succinyl-CoA	map00360	Phenylalanine metabolism	---	---	---	paaB	ring-1,2-phenylacetyl-CoA epoxidase subunit PaaB	---	K02610	---	---	0	0	0	1	0	0	0	1	0	0	0	0	0	1	1	0	0	0	0	0	1	1	0	1	0	1	0	0	0	0	0	0	0	1	1
	575	M00878	Phenylacetate degradation, phenylaxetate => acetyl-CoA/succinyl-CoA	map01100	Metabolic pathways	---	---	---	paaB	ring-1,2-phenylacetyl-CoA epoxidase subunit PaaB	---	K02610	---	---	0	0	0	1	0	0	0	1	0	0	0	0	0	1	1	0	0	0	0	0	1	1	0	1	0	1	0	0	0	0	0	0	0	1	1
	576	M00878	Phenylacetate degradation, phenylaxetate => acetyl-CoA/succinyl-CoA	map01120	Microbial metabolism in diverse environments	---	---	---	paaB	ring-1,2-phenylacetyl-CoA epoxidase subunit PaaB	---	K02610	---	---	0	0	0	1	0	0	0	1	0	0	0	0	0	1	1	0	0	0	0	0	1	1	0	1	0	1	0	0	0	0	0	0	0	1	1
	577	M00878	Phenylacetate degradation, phenylaxetate => acetyl-CoA/succinyl-CoA	map00360	Phenylalanine metabolism	---	---	---	paaC	ring-1,2-phenylacetyl-CoA epoxidase subunit PaaC [EC:1.14.13.149]	ec:1.14.13.149	K02611	---	---	0	0	0	1	0	0	0	1	0	0	0	0	0	1	1	0	0	0	0	0	1	1	0	1	0	1	0	0	0	0	0	0	0	1	1
	578	M00878	Phenylacetate degradation, phenylaxetate => acetyl-CoA/succinyl-CoA	map01100	Metabolic pathways	---	---	---	paaC	ring-1,2-phenylacetyl-CoA epoxidase subunit PaaC [EC:1.14.13.149]	ec:1.14.13.149	K02611	---	---	0	0	0	1	0	0	0	1	0	0	0	0	0	1	1	0	0	0	0	0	1	1	0	1	0	1	0	0	0	0	0	0	0	1	1
	579	M00878	Phenylacetate degradation, phenylaxetate => acetyl-CoA/succinyl-CoA	map01120	Microbial metabolism in diverse environments	---	---	---	paaC	ring-1,2-phenylacetyl-CoA epoxidase subunit PaaC [EC:1.14.13.149]	ec:1.14.13.149	K02611	---	---	0	0	0	1	0	0	0	1	0	0	0	0	0	1	1	0	0	0	0	0	1	1	0	1	0	1	0	0	0	0	0	0	0	1	1
	580	M00878	Phenylacetate degradation, phenylaxetate => acetyl-CoA/succinyl-CoA	map00360	Phenylalanine metabolism	---	---	---	paaD	ring-1,2-phenylacetyl-CoA epoxidase subunit PaaD	---	K02612	---	---	0	0	0	1	0	0	0	1	0	0	0	0	0	1	1	0	0	0	0	0	1	1	0	1	0	1	0	0	0	0	0	0	0	1	1
	581	M00878	Phenylacetate degradation, phenylaxetate => acetyl-CoA/succinyl-CoA	map01100	Metabolic pathways	---	---	---	paaD	ring-1,2-phenylacetyl-CoA epoxidase subunit PaaD	---	K02612	---	---	0	0	0	1	0	0	0	1	0	0	0	0	0	1	1	0	0	0	0	0	1	1	0	1	0	1	0	0	0	0	0	0	0	1	1
	582	M00878	Phenylacetate degradation, phenylaxetate => acetyl-CoA/succinyl-CoA	map01120	Microbial metabolism in diverse environments	---	---	---	paaD	ring-1,2-phenylacetyl-CoA epoxidase subunit PaaD	---	K02612	---	---	0	0	0	1	0	0	0	1	0	0	0	0	0	1	1	0	0	0	0	0	1	1	0	1	0	1	0	0	0	0	0	0	0	1	1
	583	M00878	Phenylacetate degradation, phenylaxetate => acetyl-CoA/succinyl-CoA	map00360	Phenylalanine metabolism	---	---	---	paaE	ring-1,2-phenylacetyl-CoA epoxidase subunit PaaE	---	K02613	---	---	0	0	0	1	0	0	0	1	0	1	0	0	0	1	1	0	0	0	1	0	1	1	0	1	0	2	0	1	0	0	0	0	0	1	1
	584	M00878	Phenylacetate degradation, phenylaxetate => acetyl-CoA/succinyl-CoA	map01100	Metabolic pathways	---	---	---	paaE	ring-1,2-phenylacetyl-CoA epoxidase subunit PaaE	---	K02613	---	---	0	0	0	1	0	0	0	1	0	1	0	0	0	1	1	0	0	0	1	0	1	1	0	1	0	2	0	1	0	0	0	0	0	1	1
	585	M00878	Phenylacetate degradation, phenylaxetate => acetyl-CoA/succinyl-CoA	map01120	Microbial metabolism in diverse environments	---	---	---	paaE	ring-1,2-phenylacetyl-CoA epoxidase subunit PaaE	---	K02613	---	---	0	0	0	1	0	0	0	1	0	1	0	0	0	1	1	0	0	0	1	0	1	1	0	1	0	2	0	1	0	0	0	0	0	1	1
	586	M00876	Staphyloferrin A biosynthesis, L-ornithine => staphyloferrin A	map00472	D-Arginine and D-ornithine metabolism	---	---	---	orr	ornithine racemase [EC:5.1.1.12]	ec:5.1.1.12	K21898	---	---	0	0	0	0	0	0	0	0	0	1	0	0	0	0	0	0	0	0	1	0	0	0	0	0	0	0	0	0	0	0	0	0	0	1	1
	587	M00876	Staphyloferrin A biosynthesis, L-ornithine => staphyloferrin A	map00997	Biosynthesis of various secondary metabolites - part 3	---	---	---	orr	ornithine racemase [EC:5.1.1.12]	ec:5.1.1.12	K21898	---	---	0	0	0	0	0	0	0	0	0	1	0	0	0	0	0	0	0	0	1	0	0	0	0	0	0	0	0	0	0	0	0	0	0	1	1
	588	M00876	Staphyloferrin A biosynthesis, L-ornithine => staphyloferrin A	map01100	Metabolic pathways	---	---	---	orr	ornithine racemase [EC:5.1.1.12]	ec:5.1.1.12	K21898	---	---	0	0	0	0	0	0	0	0	0	1	0	0	0	0	0	0	0	0	1	0	0	0	0	0	0	0	0	0	0	0	0	0	0	1	1
	589	M00876	Staphyloferrin A biosynthesis, L-ornithine => staphyloferrin A	map01110	Biosynthesis of secondary metabolites	---	---	---	orr	ornithine racemase [EC:5.1.1.12]	ec:5.1.1.12	K21898	---	---	0	0	0	0	0	0	0	0	0	1	0	0	0	0	0	0	0	0	1	0	0	0	0	0	0	0	0	0	0	0	0	0	0	1	1
	590	M00875	Staphyloferrin B biosynthesis, L-serine => staphyloferrin B	map00997	Biosynthesis of various secondary metabolites - part 3	---	---	---	sbnH	2-[(L-alanin-3-ylcarbamoyl)methyl]-2-hydroxybutanedioate decarboxylase [EC:4.1.1.117]	ec:4.1.1.117	K23373	---	---	0	1	0	0	0	0	0	0	0	0	0	0	0	0	0	0	0	1	0	0	0	0	0	0	0	0	0	0	0	0	0	0	1	0	0
	591	M00875	Staphyloferrin B biosynthesis, L-serine => staphyloferrin B	map01100	Metabolic pathways	---	---	---	sbnH	2-[(L-alanin-3-ylcarbamoyl)methyl]-2-hydroxybutanedioate decarboxylase [EC:4.1.1.117]	ec:4.1.1.117	K23373	---	---	0	1	0	0	0	0	0	0	0	0	0	0	0	0	0	0	0	1	0	0	0	0	0	0	0	0	0	0	0	0	0	0	1	0	0
	592	M00875	Staphyloferrin B biosynthesis, L-serine => staphyloferrin B	map01110	Biosynthesis of secondary metabolites	---	---	---	sbnH	2-[(L-alanin-3-ylcarbamoyl)methyl]-2-hydroxybutanedioate decarboxylase [EC:4.1.1.117]	ec:4.1.1.117	K23373	---	---	0	1	0	0	0	0	0	0	0	0	0	0	0	0	0	0	0	1	0	0	0	0	0	0	0	0	0	0	0	0	0	0	1	0	0
	593	M00875	Staphyloferrin B biosynthesis, L-serine => staphyloferrin B	map00997	Biosynthesis of various secondary metabolites - part 3	---	---	---	sbnA	N-(2-amino-2-carboxyethyl)-L-glutamate synthase [EC:2.5.1.140]	ec:2.5.1.140	K21949	---	---	0	0	0	0	0	0	0	0	0	0	0	0	0	0	0	0	0	0	0	1	0	0	0	0	0	0	0	0	0	0	0	0	0	0	0
	594	M00875	Staphyloferrin B biosynthesis, L-serine => staphyloferrin B	map01100	Metabolic pathways	---	---	---	sbnA	N-(2-amino-2-carboxyethyl)-L-glutamate synthase [EC:2.5.1.140]	ec:2.5.1.140	K21949	---	---	0	0	0	0	0	0	0	0	0	0	0	0	0	0	0	0	0	0	0	1	0	0	0	0	0	0	0	0	0	0	0	0	0	0	0
	595	M00875	Staphyloferrin B biosynthesis, L-serine => staphyloferrin B	map01110	Biosynthesis of secondary metabolites	---	---	---	sbnA	N-(2-amino-2-carboxyethyl)-L-glutamate synthase [EC:2.5.1.140]	ec:2.5.1.140	K21949	---	---	0	0	0	0	0	0	0	0	0	0	0	0	0	0	0	0	0	0	0	1	0	0	0	0	0	0	0	0	0	0	0	0	0	0	0
	596	M00874	Fatty acid biosynthesis in mitochondria, fungi	map00061	Fatty acid biosynthesis	---	---	---	fabG, OAR1	3-oxoacyl-[acyl-carrier protein] reductase [EC:1.1.1.100]	ec:1.1.1.100	K00059	---	---	5	5	2	2	4	1	3	1	1	2	2	7	2	3	6	3	3	5	2	1	4	3	3	2	1	1	2	2	4	3	3	2	5	3	3
	597	M00874	Fatty acid biosynthesis in mitochondria, fungi	map00333	Prodigiosin biosynthesis	---	---	---	fabG, OAR1	3-oxoacyl-[acyl-carrier protein] reductase [EC:1.1.1.100]	ec:1.1.1.100	K00059	---	---	5	5	2	2	4	1	3	1	1	2	2	7	2	3	6	3	3	5	2	1	4	3	3	2	1	1	2	2	4	3	3	2	5	3	3
	598	M00874	Fatty acid biosynthesis in mitochondria, fungi	map00780	Biotin metabolism	---	---	---	fabG, OAR1	3-oxoacyl-[acyl-carrier protein] reductase [EC:1.1.1.100]	ec:1.1.1.100	K00059	---	---	5	5	2	2	4	1	3	1	1	2	2	7	2	3	6	3	3	5	2	1	4	3	3	2	1	1	2	2	4	3	3	2	5	3	3
	599	M00874	Fatty acid biosynthesis in mitochondria, fungi	map01100	Metabolic pathways	---	---	---	fabG, OAR1	3-oxoacyl-[acyl-carrier protein] reductase [EC:1.1.1.100]	ec:1.1.1.100	K00059	---	---	5	5	2	2	4	1	3	1	1	2	2	7	2	3	6	3	3	5	2	1	4	3	3	2	1	1	2	2	4	3	3	2	5	3	3
	600	M00874	Fatty acid biosynthesis in mitochondria, fungi	map01110	Biosynthesis of secondary metabolites	---	---	---	fabG, OAR1	3-oxoacyl-[acyl-carrier protein] reductase [EC:1.1.1.100]	ec:1.1.1.100	K00059	---	---	5	5	2	2	4	1	3	1	1	2	2	7	2	3	6	3	3	5	2	1	4	3	3	2	1	1	2	2	4	3	3	2	5	3	3
	601	M00874	Fatty acid biosynthesis in mitochondria, fungi	map01212	Fatty acid metabolism	---	---	---	fabG, OAR1	3-oxoacyl-[acyl-carrier protein] reductase [EC:1.1.1.100]	ec:1.1.1.100	K00059	---	---	5	5	2	2	4	1	3	1	1	2	2	7	2	3	6	3	3	5	2	1	4	3	3	2	1	1	2	2	4	3	3	2	5	3	3
	602	M00874	Fatty acid biosynthesis in mitochondria, fungi	map01240	Biosynthesis of cofactors	---	---	---	fabG, OAR1	3-oxoacyl-[acyl-carrier protein] reductase [EC:1.1.1.100]	ec:1.1.1.100	K00059	---	---	5	5	2	2	4	1	3	1	1	2	2	7	2	3	6	3	3	5	2	1	4	3	3	2	1	1	2	2	4	3	3	2	5	3	3
	603	M00874	Fatty acid biosynthesis in mitochondria, fungi	map00061	Fatty acid biosynthesis	---	---	---	fabD, MCAT, MCT1	[acyl-carrier-protein] S-malonyltransferase [EC:2.3.1.39]	ec:2.3.1.39	K00645	---	---	1	1	1	1	1	0	1	1	1	0	1	1	0	1	1	0	1	1	1	1	1	1	1	1	0	1	1	1	1	1	1	1	1	1	1
	604	M00874	Fatty acid biosynthesis in mitochondria, fungi	map00333	Prodigiosin biosynthesis	---	---	---	fabD, MCAT, MCT1	[acyl-carrier-protein] S-malonyltransferase [EC:2.3.1.39]	ec:2.3.1.39	K00645	---	---	1	1	1	1	1	0	1	1	1	0	1	1	0	1	1	0	1	1	1	1	1	1	1	1	0	1	1	1	1	1	1	1	1	1	1
	605	M00874	Fatty acid biosynthesis in mitochondria, fungi	map01100	Metabolic pathways	---	---	---	fabD, MCAT, MCT1	[acyl-carrier-protein] S-malonyltransferase [EC:2.3.1.39]	ec:2.3.1.39	K00645	---	---	1	1	1	1	1	0	1	1	1	0	1	1	0	1	1	0	1	1	1	1	1	1	1	1	0	1	1	1	1	1	1	1	1	1	1
	606	M00874	Fatty acid biosynthesis in mitochondria, fungi	map01110	Biosynthesis of secondary metabolites	---	---	---	fabD, MCAT, MCT1	[acyl-carrier-protein] S-malonyltransferase [EC:2.3.1.39]	ec:2.3.1.39	K00645	---	---	1	1	1	1	1	0	1	1	1	0	1	1	0	1	1	0	1	1	1	1	1	1	1	1	0	1	1	1	1	1	1	1	1	1	1
	607	M00874	Fatty acid biosynthesis in mitochondria, fungi	map01212	Fatty acid metabolism	---	---	---	fabD, MCAT, MCT1	[acyl-carrier-protein] S-malonyltransferase [EC:2.3.1.39]	ec:2.3.1.39	K00645	---	---	1	1	1	1	1	0	1	1	1	0	1	1	0	1	1	0	1	1	1	1	1	1	1	1	0	1	1	1	1	1	1	1	1	1	1
	608	M00874	Fatty acid biosynthesis in mitochondria, fungi	map00061	Fatty acid biosynthesis	---	---	---	fabF, OXSM, CEM1	3-oxoacyl-[acyl-carrier-protein] synthase II [EC:2.3.1.179]	ec:2.3.1.179	K09458	---	---	1	1	1	1	1	0	0	1	1	1	1	0	0	1	1	0	1	1	0	1	1	1	0	1	1	1	0	1	1	1	1	1	1	1	1
	609	M00874	Fatty acid biosynthesis in mitochondria, fungi	map00780	Biotin metabolism	---	---	---	fabF, OXSM, CEM1	3-oxoacyl-[acyl-carrier-protein] synthase II [EC:2.3.1.179]	ec:2.3.1.179	K09458	---	---	1	1	1	1	1	0	0	1	1	1	1	0	0	1	1	0	1	1	0	1	1	1	0	1	1	1	0	1	1	1	1	1	1	1	1
	610	M00874	Fatty acid biosynthesis in mitochondria, fungi	map01100	Metabolic pathways	---	---	---	fabF, OXSM, CEM1	3-oxoacyl-[acyl-carrier-protein] synthase II [EC:2.3.1.179]	ec:2.3.1.179	K09458	---	---	1	1	1	1	1	0	0	1	1	1	1	0	0	1	1	0	1	1	0	1	1	1	0	1	1	1	0	1	1	1	1	1	1	1	1
	611	M00874	Fatty acid biosynthesis in mitochondria, fungi	map01212	Fatty acid metabolism	---	---	---	fabF, OXSM, CEM1	3-oxoacyl-[acyl-carrier-protein] synthase II [EC:2.3.1.179]	ec:2.3.1.179	K09458	---	---	1	1	1	1	1	0	0	1	1	1	1	0	0	1	1	0	1	1	0	1	1	1	0	1	1	1	0	1	1	1	1	1	1	1	1
	612	M00874	Fatty acid biosynthesis in mitochondria, fungi	map01240	Biosynthesis of cofactors	---	---	---	fabF, OXSM, CEM1	3-oxoacyl-[acyl-carrier-protein] synthase II [EC:2.3.1.179]	ec:2.3.1.179	K09458	---	---	1	1	1	1	1	0	0	1	1	1	1	0	0	1	1	0	1	1	0	1	1	1	0	1	1	1	0	1	1	1	1	1	1	1	1
	613	M00873	Fatty acid biosynthesis in mitochondria, animals	map00061	Fatty acid biosynthesis	---	---	---	fabD, MCAT, MCT1	[acyl-carrier-protein] S-malonyltransferase [EC:2.3.1.39]	ec:2.3.1.39	K00645	---	---	1	1	1	1	1	0	1	1	1	0	1	1	0	1	1	0	1	1	1	1	1	1	1	1	0	1	1	1	1	1	1	1	1	1	1
	614	M00873	Fatty acid biosynthesis in mitochondria, animals	map00333	Prodigiosin biosynthesis	---	---	---	fabD, MCAT, MCT1	[acyl-carrier-protein] S-malonyltransferase [EC:2.3.1.39]	ec:2.3.1.39	K00645	---	---	1	1	1	1	1	0	1	1	1	0	1	1	0	1	1	0	1	1	1	1	1	1	1	1	0	1	1	1	1	1	1	1	1	1	1
	615	M00873	Fatty acid biosynthesis in mitochondria, animals	map01100	Metabolic pathways	---	---	---	fabD, MCAT, MCT1	[acyl-carrier-protein] S-malonyltransferase [EC:2.3.1.39]	ec:2.3.1.39	K00645	---	---	1	1	1	1	1	0	1	1	1	0	1	1	0	1	1	0	1	1	1	1	1	1	1	1	0	1	1	1	1	1	1	1	1	1	1
	616	M00873	Fatty acid biosynthesis in mitochondria, animals	map01110	Biosynthesis of secondary metabolites	---	---	---	fabD, MCAT, MCT1	[acyl-carrier-protein] S-malonyltransferase [EC:2.3.1.39]	ec:2.3.1.39	K00645	---	---	1	1	1	1	1	0	1	1	1	0	1	1	0	1	1	0	1	1	1	1	1	1	1	1	0	1	1	1	1	1	1	1	1	1	1
	617	M00873	Fatty acid biosynthesis in mitochondria, animals	map01212	Fatty acid metabolism	---	---	---	fabD, MCAT, MCT1	[acyl-carrier-protein] S-malonyltransferase [EC:2.3.1.39]	ec:2.3.1.39	K00645	---	---	1	1	1	1	1	0	1	1	1	0	1	1	0	1	1	0	1	1	1	1	1	1	1	1	0	1	1	1	1	1	1	1	1	1	1
	618	M00873	Fatty acid biosynthesis in mitochondria, animals	map00061	Fatty acid biosynthesis	---	---	---	fabF, OXSM, CEM1	3-oxoacyl-[acyl-carrier-protein] synthase II [EC:2.3.1.179]	ec:2.3.1.179	K09458	---	---	1	1	1	1	1	0	0	1	1	1	1	0	0	1	1	0	1	1	0	1	1	1	0	1	1	1	0	1	1	1	1	1	1	1	1
	619	M00873	Fatty acid biosynthesis in mitochondria, animals	map00780	Biotin metabolism	---	---	---	fabF, OXSM, CEM1	3-oxoacyl-[acyl-carrier-protein] synthase II [EC:2.3.1.179]	ec:2.3.1.179	K09458	---	---	1	1	1	1	1	0	0	1	1	1	1	0	0	1	1	0	1	1	0	1	1	1	0	1	1	1	0	1	1	1	1	1	1	1	1
	620	M00873	Fatty acid biosynthesis in mitochondria, animals	map01100	Metabolic pathways	---	---	---	fabF, OXSM, CEM1	3-oxoacyl-[acyl-carrier-protein] synthase II [EC:2.3.1.179]	ec:2.3.1.179	K09458	---	---	1	1	1	1	1	0	0	1	1	1	1	0	0	1	1	0	1	1	0	1	1	1	0	1	1	1	0	1	1	1	1	1	1	1	1
	621	M00873	Fatty acid biosynthesis in mitochondria, animals	map01212	Fatty acid metabolism	---	---	---	fabF, OXSM, CEM1	3-oxoacyl-[acyl-carrier-protein] synthase II [EC:2.3.1.179]	ec:2.3.1.179	K09458	---	---	1	1	1	1	1	0	0	1	1	1	1	0	0	1	1	0	1	1	0	1	1	1	0	1	1	1	0	1	1	1	1	1	1	1	1
	622	M00873	Fatty acid biosynthesis in mitochondria, animals	map01240	Biosynthesis of cofactors	---	---	---	fabF, OXSM, CEM1	3-oxoacyl-[acyl-carrier-protein] synthase II [EC:2.3.1.179]	ec:2.3.1.179	K09458	---	---	1	1	1	1	1	0	0	1	1	1	1	0	0	1	1	0	1	1	0	1	1	1	0	1	1	1	0	1	1	1	1	1	1	1	1
	623	M00868	Heme biosynthesis, animals and fungi, glycine => heme	map00860	Porphyrin and chlorophyll metabolism	---	---	---	hemC, HMBS	hydroxymethylbilane synthase [EC:2.5.1.61]	ec:2.5.1.61	K01749	---	---	1	1	1	1	1	1	1	1	1	1	1	1	1	1	2	1	1	1	1	1	1	1	2	1	1	1	1	1	1	1	1	1	1	1	1
	624	M00868	Heme biosynthesis, animals and fungi, glycine => heme	map01100	Metabolic pathways	---	---	---	hemC, HMBS	hydroxymethylbilane synthase [EC:2.5.1.61]	ec:2.5.1.61	K01749	---	---	1	1	1	1	1	1	1	1	1	1	1	1	1	1	2	1	1	1	1	1	1	1	2	1	1	1	1	1	1	1	1	1	1	1	1
	625	M00868	Heme biosynthesis, animals and fungi, glycine => heme	map01110	Biosynthesis of secondary metabolites	---	---	---	hemC, HMBS	hydroxymethylbilane synthase [EC:2.5.1.61]	ec:2.5.1.61	K01749	---	---	1	1	1	1	1	1	1	1	1	1	1	1	1	1	2	1	1	1	1	1	1	1	2	1	1	1	1	1	1	1	1	1	1	1	1
	626	M00868	Heme biosynthesis, animals and fungi, glycine => heme	map01120	Microbial metabolism in diverse environments	---	---	---	hemC, HMBS	hydroxymethylbilane synthase [EC:2.5.1.61]	ec:2.5.1.61	K01749	---	---	1	1	1	1	1	1	1	1	1	1	1	1	1	1	2	1	1	1	1	1	1	1	2	1	1	1	1	1	1	1	1	1	1	1	1
	627	M00868	Heme biosynthesis, animals and fungi, glycine => heme	map01240	Biosynthesis of cofactors	---	---	---	hemC, HMBS	hydroxymethylbilane synthase [EC:2.5.1.61]	ec:2.5.1.61	K01749	---	---	1	1	1	1	1	1	1	1	1	1	1	1	1	1	2	1	1	1	1	1	1	1	2	1	1	1	1	1	1	1	1	1	1	1	1
	628	M00868	Heme biosynthesis, animals and fungi, glycine => heme	map00860	Porphyrin and chlorophyll metabolism	---	---	---	hemE, UROD	uroporphyrinogen decarboxylase [EC:4.1.1.37]	ec:4.1.1.37	K01599	---	---	1	1	1	1	1	1	1	1	1	1	1	1	1	1	2	1	1	1	1	1	1	1	1	1	1	1	1	1	1	1	1	1	1	1	1
	629	M00868	Heme biosynthesis, animals and fungi, glycine => heme	map01100	Metabolic pathways	---	---	---	hemE, UROD	uroporphyrinogen decarboxylase [EC:4.1.1.37]	ec:4.1.1.37	K01599	---	---	1	1	1	1	1	1	1	1	1	1	1	1	1	1	2	1	1	1	1	1	1	1	1	1	1	1	1	1	1	1	1	1	1	1	1
	630	M00868	Heme biosynthesis, animals and fungi, glycine => heme	map01110	Biosynthesis of secondary metabolites	---	---	---	hemE, UROD	uroporphyrinogen decarboxylase [EC:4.1.1.37]	ec:4.1.1.37	K01599	---	---	1	1	1	1	1	1	1	1	1	1	1	1	1	1	2	1	1	1	1	1	1	1	1	1	1	1	1	1	1	1	1	1	1	1	1
	631	M00868	Heme biosynthesis, animals and fungi, glycine => heme	map01240	Biosynthesis of cofactors	---	---	---	hemE, UROD	uroporphyrinogen decarboxylase [EC:4.1.1.37]	ec:4.1.1.37	K01599	---	---	1	1	1	1	1	1	1	1	1	1	1	1	1	1	2	1	1	1	1	1	1	1	1	1	1	1	1	1	1	1	1	1	1	1	1
	632	M00868	Heme biosynthesis, animals and fungi, glycine => heme	map00860	Porphyrin and chlorophyll metabolism	---	---	---	hemD, UROS	uroporphyrinogen-III synthase [EC:4.2.1.75]	ec:4.2.1.75	K01719	---	---	1	1	1	1	1	1	1	1	1	2	1	1	1	1	1	1	1	1	2	1	1	1	2	1	0	2	1	2	1	1	1	1	1	1	1
	633	M00868	Heme biosynthesis, animals and fungi, glycine => heme	map01100	Metabolic pathways	---	---	---	hemD, UROS	uroporphyrinogen-III synthase [EC:4.2.1.75]	ec:4.2.1.75	K01719	---	---	1	1	1	1	1	1	1	1	1	2	1	1	1	1	1	1	1	1	2	1	1	1	2	1	0	2	1	2	1	1	1	1	1	1	1
	634	M00868	Heme biosynthesis, animals and fungi, glycine => heme	map01110	Biosynthesis of secondary metabolites	---	---	---	hemD, UROS	uroporphyrinogen-III synthase [EC:4.2.1.75]	ec:4.2.1.75	K01719	---	---	1	1	1	1	1	1	1	1	1	2	1	1	1	1	1	1	1	1	2	1	1	1	2	1	0	2	1	2	1	1	1	1	1	1	1
	635	M00868	Heme biosynthesis, animals and fungi, glycine => heme	map01120	Microbial metabolism in diverse environments	---	---	---	hemD, UROS	uroporphyrinogen-III synthase [EC:4.2.1.75]	ec:4.2.1.75	K01719	---	---	1	1	1	1	1	1	1	1	1	2	1	1	1	1	1	1	1	1	2	1	1	1	2	1	0	2	1	2	1	1	1	1	1	1	1
	636	M00868	Heme biosynthesis, animals and fungi, glycine => heme	map01240	Biosynthesis of cofactors	---	---	---	hemD, UROS	uroporphyrinogen-III synthase [EC:4.2.1.75]	ec:4.2.1.75	K01719	---	---	1	1	1	1	1	1	1	1	1	2	1	1	1	1	1	1	1	1	2	1	1	1	2	1	0	2	1	2	1	1	1	1	1	1	1
	637	M00868	Heme biosynthesis, animals and fungi, glycine => heme	map00860	Porphyrin and chlorophyll metabolism	---	---	---	hemH, FECH	protoporphyrin/coproporphyrin ferrochelatase [EC:4.99.1.1 4.99.1.9]	ec:4.99.1.1	K01772	---	---	1	1	1	1	1	1	1	1	1	1	1	1	1	1	1	1	1	1	1	1	1	1	1	1	1	1	1	1	1	1	1	1	1	1	1
	638	M00868	Heme biosynthesis, animals and fungi, glycine => heme	map00860	Porphyrin and chlorophyll metabolism	---	---	---	hemH, FECH	protoporphyrin/coproporphyrin ferrochelatase [EC:4.99.1.1 4.99.1.9]	ec:4.99.1.9	K01772	---	---	1	1	1	1	1	1	1	1	1	1	1	1	1	1	1	1	1	1	1	1	1	1	1	1	1	1	1	1	1	1	1	1	1	1	1
	639	M00868	Heme biosynthesis, animals and fungi, glycine => heme	map01100	Metabolic pathways	---	---	---	hemH, FECH	protoporphyrin/coproporphyrin ferrochelatase [EC:4.99.1.1 4.99.1.9]	ec:4.99.1.1	K01772	---	---	1	1	1	1	1	1	1	1	1	1	1	1	1	1	1	1	1	1	1	1	1	1	1	1	1	1	1	1	1	1	1	1	1	1	1
	640	M00868	Heme biosynthesis, animals and fungi, glycine => heme	map01100	Metabolic pathways	---	---	---	hemH, FECH	protoporphyrin/coproporphyrin ferrochelatase [EC:4.99.1.1 4.99.1.9]	ec:4.99.1.9	K01772	---	---	1	1	1	1	1	1	1	1	1	1	1	1	1	1	1	1	1	1	1	1	1	1	1	1	1	1	1	1	1	1	1	1	1	1	1
	641	M00868	Heme biosynthesis, animals and fungi, glycine => heme	map01110	Biosynthesis of secondary metabolites	---	---	---	hemH, FECH	protoporphyrin/coproporphyrin ferrochelatase [EC:4.99.1.1 4.99.1.9]	ec:4.99.1.1	K01772	---	---	1	1	1	1	1	1	1	1	1	1	1	1	1	1	1	1	1	1	1	1	1	1	1	1	1	1	1	1	1	1	1	1	1	1	1
	642	M00868	Heme biosynthesis, animals and fungi, glycine => heme	map01110	Biosynthesis of secondary metabolites	---	---	---	hemH, FECH	protoporphyrin/coproporphyrin ferrochelatase [EC:4.99.1.1 4.99.1.9]	ec:4.99.1.9	K01772	---	---	1	1	1	1	1	1	1	1	1	1	1	1	1	1	1	1	1	1	1	1	1	1	1	1	1	1	1	1	1	1	1	1	1	1	1
	643	M00868	Heme biosynthesis, animals and fungi, glycine => heme	map01240	Biosynthesis of cofactors	---	---	---	hemH, FECH	protoporphyrin/coproporphyrin ferrochelatase [EC:4.99.1.1 4.99.1.9]	ec:4.99.1.1	K01772	---	---	1	1	1	1	1	1	1	1	1	1	1	1	1	1	1	1	1	1	1	1	1	1	1	1	1	1	1	1	1	1	1	1	1	1	1
	644	M00868	Heme biosynthesis, animals and fungi, glycine => heme	map01240	Biosynthesis of cofactors	---	---	---	hemH, FECH	protoporphyrin/coproporphyrin ferrochelatase [EC:4.99.1.1 4.99.1.9]	ec:4.99.1.9	K01772	---	---	1	1	1	1	1	1	1	1	1	1	1	1	1	1	1	1	1	1	1	1	1	1	1	1	1	1	1	1	1	1	1	1	1	1	1
	645	M00868	Heme biosynthesis, animals and fungi, glycine => heme	map00860	Porphyrin and chlorophyll metabolism	---	---	---	CPOX, hemF	coproporphyrinogen III oxidase [EC:1.3.3.3]	ec:1.3.3.3	K00228	---	---	1	1	1	1	1	0	1	1	1	1	1	1	1	1	1	1	1	1	2	1	1	1	1	1	1	1	1	1	1	1	1	1	1	1	1
	646	M00868	Heme biosynthesis, animals and fungi, glycine => heme	map01100	Metabolic pathways	---	---	---	CPOX, hemF	coproporphyrinogen III oxidase [EC:1.3.3.3]	ec:1.3.3.3	K00228	---	---	1	1	1	1	1	0	1	1	1	1	1	1	1	1	1	1	1	1	2	1	1	1	1	1	1	1	1	1	1	1	1	1	1	1	1
	647	M00868	Heme biosynthesis, animals and fungi, glycine => heme	map01110	Biosynthesis of secondary metabolites	---	---	---	CPOX, hemF	coproporphyrinogen III oxidase [EC:1.3.3.3]	ec:1.3.3.3	K00228	---	---	1	1	1	1	1	0	1	1	1	1	1	1	1	1	1	1	1	1	2	1	1	1	1	1	1	1	1	1	1	1	1	1	1	1	1
	648	M00868	Heme biosynthesis, animals and fungi, glycine => heme	map01240	Biosynthesis of cofactors	---	---	---	CPOX, hemF	coproporphyrinogen III oxidase [EC:1.3.3.3]	ec:1.3.3.3	K00228	---	---	1	1	1	1	1	0	1	1	1	1	1	1	1	1	1	1	1	1	2	1	1	1	1	1	1	1	1	1	1	1	1	1	1	1	1
	649	M00868	Heme biosynthesis, animals and fungi, glycine => heme	map00260	Glycine, serine and threonine metabolism	---	---	---	E2.3.1.37, ALAS	5-aminolevulinate synthase [EC:2.3.1.37]	ec:2.3.1.37	K00643	---	---	1	0	0	1	1	0	0	2	0	0	0	1	0	1	3	0	1	0	0	0	2	1	0	1	0	0	0	0	0	1	0	0	0	1	1
	650	M00868	Heme biosynthesis, animals and fungi, glycine => heme	map00860	Porphyrin and chlorophyll metabolism	---	---	---	E2.3.1.37, ALAS	5-aminolevulinate synthase [EC:2.3.1.37]	ec:2.3.1.37	K00643	---	---	1	0	0	1	1	0	0	2	0	0	0	1	0	1	3	0	1	0	0	0	2	1	0	1	0	0	0	0	0	1	0	0	0	1	1
	651	M00868	Heme biosynthesis, animals and fungi, glycine => heme	map01100	Metabolic pathways	---	---	---	E2.3.1.37, ALAS	5-aminolevulinate synthase [EC:2.3.1.37]	ec:2.3.1.37	K00643	---	---	1	0	0	1	1	0	0	2	0	0	0	1	0	1	3	0	1	0	0	0	2	1	0	1	0	0	0	0	0	1	0	0	0	1	1
	652	M00868	Heme biosynthesis, animals and fungi, glycine => heme	map01110	Biosynthesis of secondary metabolites	---	---	---	E2.3.1.37, ALAS	5-aminolevulinate synthase [EC:2.3.1.37]	ec:2.3.1.37	K00643	---	---	1	0	0	1	1	0	0	2	0	0	0	1	0	1	3	0	1	0	0	0	2	1	0	1	0	0	0	0	0	1	0	0	0	1	1
	653	M00868	Heme biosynthesis, animals and fungi, glycine => heme	map01240	Biosynthesis of cofactors	---	---	---	E2.3.1.37, ALAS	5-aminolevulinate synthase [EC:2.3.1.37]	ec:2.3.1.37	K00643	---	---	1	0	0	1	1	0	0	2	0	0	0	1	0	1	3	0	1	0	0	0	2	1	0	1	0	0	0	0	0	1	0	0	0	1	1
	654	M00868	Heme biosynthesis, animals and fungi, glycine => heme	map00860	Porphyrin and chlorophyll metabolism	---	---	---	hemB, ALAD	porphobilinogen synthase [EC:4.2.1.24]	ec:4.2.1.24	K01698	---	---	1	1	1	1	1	0	1	1	1	1	1	1	1	1	1	1	1	1	1	1	1	1	1	1	1	1	1	1	1	1	1	1	1	1	1
	655	M00868	Heme biosynthesis, animals and fungi, glycine => heme	map01100	Metabolic pathways	---	---	---	hemB, ALAD	porphobilinogen synthase [EC:4.2.1.24]	ec:4.2.1.24	K01698	---	---	1	1	1	1	1	0	1	1	1	1	1	1	1	1	1	1	1	1	1	1	1	1	1	1	1	1	1	1	1	1	1	1	1	1	1
	656	M00868	Heme biosynthesis, animals and fungi, glycine => heme	map01110	Biosynthesis of secondary metabolites	---	---	---	hemB, ALAD	porphobilinogen synthase [EC:4.2.1.24]	ec:4.2.1.24	K01698	---	---	1	1	1	1	1	0	1	1	1	1	1	1	1	1	1	1	1	1	1	1	1	1	1	1	1	1	1	1	1	1	1	1	1	1	1
	657	M00868	Heme biosynthesis, animals and fungi, glycine => heme	map01120	Microbial metabolism in diverse environments	---	---	---	hemB, ALAD	porphobilinogen synthase [EC:4.2.1.24]	ec:4.2.1.24	K01698	---	---	1	1	1	1	1	0	1	1	1	1	1	1	1	1	1	1	1	1	1	1	1	1	1	1	1	1	1	1	1	1	1	1	1	1	1
	658	M00868	Heme biosynthesis, animals and fungi, glycine => heme	map01240	Biosynthesis of cofactors	---	---	---	hemB, ALAD	porphobilinogen synthase [EC:4.2.1.24]	ec:4.2.1.24	K01698	---	---	1	1	1	1	1	0	1	1	1	1	1	1	1	1	1	1	1	1	1	1	1	1	1	1	1	1	1	1	1	1	1	1	1	1	1
	659	M00867	KDO2-lipid A modification pathway	map00540	Lipopolysaccharide biosynthesis	---	---	---	lpxR	lipid A 3-O-deacylase [EC:3.1.1.-]	---	K09953	---	---	0	2	1	0	1	0	0	0	1	0	0	1	1	0	0	0	0	3	0	1	0	0	0	0	0	1	0	0	0	0	1	0	2	0	0
	660	M00867	KDO2-lipid A modification pathway	map01100	Metabolic pathways	---	---	---	lpxR	lipid A 3-O-deacylase [EC:3.1.1.-]	---	K09953	---	---	0	2	1	0	1	0	0	0	1	0	0	1	1	0	0	0	0	3	0	1	0	0	0	0	0	1	0	0	0	0	1	0	2	0	0
	661	M00867	KDO2-lipid A modification pathway	map00540	Lipopolysaccharide biosynthesis	---	---	---	kdoH2	3-deoxy-D-manno-octulosonic acid-hydrolase	---	K23083	---	---	0	0	1	0	0	0	0	0	1	0	0	0	0	0	0	0	0	0	0	1	0	0	0	0	0	0	0	0	0	0	1	0	0	0	0
	662	M00867	KDO2-lipid A modification pathway	map01100	Metabolic pathways	---	---	---	kdoH2	3-deoxy-D-manno-octulosonic acid-hydrolase	---	K23083	---	---	0	0	1	0	0	0	0	0	1	0	0	0	0	0	0	0	0	0	0	1	0	0	0	0	0	0	0	0	0	0	1	0	0	0	0
	663	M00867	KDO2-lipid A modification pathway	map00540	Lipopolysaccharide biosynthesis	---	---	---	eptA, pmrC	lipid A ethanolaminephosphotransferase [EC:2.7.8.43]	ec:2.7.8.43	K03760	---	---	0	0	0	3	0	0	0	1	0	0	0	0	0	0	1	0	0	0	1	0	0	0	0	3	0	0	0	0	1	0	0	0	0	0	0
	664	M00867	KDO2-lipid A modification pathway	map01100	Metabolic pathways	---	---	---	eptA, pmrC	lipid A ethanolaminephosphotransferase [EC:2.7.8.43]	ec:2.7.8.43	K03760	---	---	0	0	0	3	0	0	0	1	0	0	0	0	0	0	1	0	0	0	1	0	0	0	0	3	0	0	0	0	1	0	0	0	0	0	0
	665	M00867	KDO2-lipid A modification pathway	map01503	Cationic antimicrobial peptide (CAMP) resistance	---	---	---	eptA, pmrC	lipid A ethanolaminephosphotransferase [EC:2.7.8.43]	ec:2.7.8.43	K03760	---	---	0	0	0	3	0	0	0	1	0	0	0	0	0	0	1	0	0	0	1	0	0	0	0	3	0	0	0	0	1	0	0	0	0	0	0
	666	M00867	KDO2-lipid A modification pathway	map00540	Lipopolysaccharide biosynthesis	---	---	---	lpxF	lipid A 4'-phosphatase [EC:3.1.3.-]	---	K23159	---	---	0	0	0	0	0	0	0	0	0	1	1	0	0	0	0	0	0	0	1	0	0	0	0	0	0	0	0	0	0	1	0	0	0	0	0
	667	M00867	KDO2-lipid A modification pathway	map01100	Metabolic pathways	---	---	---	lpxF	lipid A 4'-phosphatase [EC:3.1.3.-]	---	K23159	---	---	0	0	0	0	0	0	0	0	0	1	1	0	0	0	0	0	0	0	1	0	0	0	0	0	0	0	0	0	0	1	0	0	0	0	0
	668	M00866	KDO2-lipid A biosynthesis, Raetz pathway, non-LpxL-LpxM type	map00540	Lipopolysaccharide biosynthesis	---	---	---	lpxC	UDP-3-O-[3-hydroxymyristoyl] N-acetylglucosamine deacetylase [EC:3.5.1.108]	ec:3.5.1.108	K02535	---	---	1	1	1	1	1	1	1	1	1	0	1	1	1	1	1	1	1	1	0	1	1	1	1	1	0	0	1	0	1	1	1	1	1	1	1
	669	M00866	KDO2-lipid A biosynthesis, Raetz pathway, non-LpxL-LpxM type	map01100	Metabolic pathways	---	---	---	lpxC	UDP-3-O-[3-hydroxymyristoyl] N-acetylglucosamine deacetylase [EC:3.5.1.108]	ec:3.5.1.108	K02535	---	---	1	1	1	1	1	1	1	1	1	0	1	1	1	1	1	1	1	1	0	1	1	1	1	1	0	0	1	0	1	1	1	1	1	1	1
	670	M00866	KDO2-lipid A biosynthesis, Raetz pathway, non-LpxL-LpxM type	map00540	Lipopolysaccharide biosynthesis	---	---	---	lpxK	tetraacyldisaccharide 4'-kinase [EC:2.7.1.130]	ec:2.7.1.130	K00912	---	---	1	1	1	1	1	1	1	1	1	1	1	1	1	1	1	0	1	1	1	1	1	1	1	1	1	1	1	1	1	1	1	1	1	1	1
	671	M00866	KDO2-lipid A biosynthesis, Raetz pathway, non-LpxL-LpxM type	map01100	Metabolic pathways	---	---	---	lpxK	tetraacyldisaccharide 4'-kinase [EC:2.7.1.130]	ec:2.7.1.130	K00912	---	---	1	1	1	1	1	1	1	1	1	1	1	1	1	1	1	0	1	1	1	1	1	1	1	1	1	1	1	1	1	1	1	1	1	1	1
	672	M00866	KDO2-lipid A biosynthesis, Raetz pathway, non-LpxL-LpxM type	map00540	Lipopolysaccharide biosynthesis	---	---	---	kdtA, waaA	3-deoxy-D-manno-octulosonic-acid transferase [EC:2.4.99.12 2.4.99.13 2.4.99.14 2.4.99.15]	ec:2.4.99.12	K02527	---	---	2	1	1	2	1	1	1	3	1	1	1	1	1	2	3	1	2	1	1	0	4	2	1	2	1	1	1	1	1	2	1	1	1	2	2
	673	M00866	KDO2-lipid A biosynthesis, Raetz pathway, non-LpxL-LpxM type	map00540	Lipopolysaccharide biosynthesis	---	---	---	kdtA, waaA	3-deoxy-D-manno-octulosonic-acid transferase [EC:2.4.99.12 2.4.99.13 2.4.99.14 2.4.99.15]	ec:2.4.99.13	K02527	---	---	2	1	1	2	1	1	1	3	1	1	1	1	1	2	3	1	2	1	1	0	4	2	1	2	1	1	1	1	1	2	1	1	1	2	2
	674	M00866	KDO2-lipid A biosynthesis, Raetz pathway, non-LpxL-LpxM type	map00540	Lipopolysaccharide biosynthesis	---	---	---	kdtA, waaA	3-deoxy-D-manno-octulosonic-acid transferase [EC:2.4.99.12 2.4.99.13 2.4.99.14 2.4.99.15]	ec:2.4.99.14	K02527	---	---	2	1	1	2	1	1	1	3	1	1	1	1	1	2	3	1	2	1	1	0	4	2	1	2	1	1	1	1	1	2	1	1	1	2	2
	675	M00866	KDO2-lipid A biosynthesis, Raetz pathway, non-LpxL-LpxM type	map00540	Lipopolysaccharide biosynthesis	---	---	---	kdtA, waaA	3-deoxy-D-manno-octulosonic-acid transferase [EC:2.4.99.12 2.4.99.13 2.4.99.14 2.4.99.15]	ec:2.4.99.15	K02527	---	---	2	1	1	2	1	1	1	3	1	1	1	1	1	2	3	1	2	1	1	0	4	2	1	2	1	1	1	1	1	2	1	1	1	2	2
	676	M00866	KDO2-lipid A biosynthesis, Raetz pathway, non-LpxL-LpxM type	map01100	Metabolic pathways	---	---	---	kdtA, waaA	3-deoxy-D-manno-octulosonic-acid transferase [EC:2.4.99.12 2.4.99.13 2.4.99.14 2.4.99.15]	ec:2.4.99.12	K02527	---	---	2	1	1	2	1	1	1	3	1	1	1	1	1	2	3	1	2	1	1	0	4	2	1	2	1	1	1	1	1	2	1	1	1	2	2
	677	M00866	KDO2-lipid A biosynthesis, Raetz pathway, non-LpxL-LpxM type	map01100	Metabolic pathways	---	---	---	kdtA, waaA	3-deoxy-D-manno-octulosonic-acid transferase [EC:2.4.99.12 2.4.99.13 2.4.99.14 2.4.99.15]	ec:2.4.99.13	K02527	---	---	2	1	1	2	1	1	1	3	1	1	1	1	1	2	3	1	2	1	1	0	4	2	1	2	1	1	1	1	1	2	1	1	1	2	2
	678	M00866	KDO2-lipid A biosynthesis, Raetz pathway, non-LpxL-LpxM type	map01100	Metabolic pathways	---	---	---	kdtA, waaA	3-deoxy-D-manno-octulosonic-acid transferase [EC:2.4.99.12 2.4.99.13 2.4.99.14 2.4.99.15]	ec:2.4.99.14	K02527	---	---	2	1	1	2	1	1	1	3	1	1	1	1	1	2	3	1	2	1	1	0	4	2	1	2	1	1	1	1	1	2	1	1	1	2	2
	679	M00866	KDO2-lipid A biosynthesis, Raetz pathway, non-LpxL-LpxM type	map01100	Metabolic pathways	---	---	---	kdtA, waaA	3-deoxy-D-manno-octulosonic-acid transferase [EC:2.4.99.12 2.4.99.13 2.4.99.14 2.4.99.15]	ec:2.4.99.15	K02527	---	---	2	1	1	2	1	1	1	3	1	1	1	1	1	2	3	1	2	1	1	0	4	2	1	2	1	1	1	1	1	2	1	1	1	2	2
	680	M00866	KDO2-lipid A biosynthesis, Raetz pathway, non-LpxL-LpxM type	map00540	Lipopolysaccharide biosynthesis	---	---	---	lpxL, htrB	Kdo2-lipid IVA lauroyltransferase/acyltransferase [EC:2.3.1.241 2.3.1.-]	ec:2.3.1.241	K02517	---	---	1	3	3	1	1	2	2	0	3	0	1	1	1	1	1	1	1	3	0	3	1	1	2	1	1	0	2	1	1	1	3	1	3	1	1
	681	M00866	KDO2-lipid A biosynthesis, Raetz pathway, non-LpxL-LpxM type	map01100	Metabolic pathways	---	---	---	lpxL, htrB	Kdo2-lipid IVA lauroyltransferase/acyltransferase [EC:2.3.1.241 2.3.1.-]	ec:2.3.1.241	K02517	---	---	1	3	3	1	1	2	2	0	3	0	1	1	1	1	1	1	1	3	0	3	1	1	2	1	1	0	2	1	1	1	3	1	3	1	1
	682	M00866	KDO2-lipid A biosynthesis, Raetz pathway, non-LpxL-LpxM type	map00540	Lipopolysaccharide biosynthesis	---	---	---	lpxD	UDP-3-O-[3-hydroxymyristoyl] glucosamine N-acyltransferase [EC:2.3.1.191]	ec:2.3.1.191	K02536	---	---	1	1	1	1	1	2	0	1	1	2	1	1	0	1	1	1	1	1	1	1	1	1	1	1	1	2	1	2	1	1	1	1	1	1	1
	683	M00866	KDO2-lipid A biosynthesis, Raetz pathway, non-LpxL-LpxM type	map01100	Metabolic pathways	---	---	---	lpxD	UDP-3-O-[3-hydroxymyristoyl] glucosamine N-acyltransferase [EC:2.3.1.191]	ec:2.3.1.191	K02536	---	---	1	1	1	1	1	2	0	1	1	2	1	1	0	1	1	1	1	1	1	1	1	1	1	1	1	2	1	2	1	1	1	1	1	1	1
	684	M00866	KDO2-lipid A biosynthesis, Raetz pathway, non-LpxL-LpxM type	map00540	Lipopolysaccharide biosynthesis	---	---	---	lpxA	UDP-N-acetylglucosamine acyltransferase [EC:2.3.1.129]	ec:2.3.1.129	K00677	---	---	1	1	1	1	1	2	0	0	1	1	1	1	0	1	1	0	1	1	1	1	1	1	1	1	1	1	1	1	1	1	1	1	1	1	1
	685	M00866	KDO2-lipid A biosynthesis, Raetz pathway, non-LpxL-LpxM type	map01100	Metabolic pathways	---	---	---	lpxA	UDP-N-acetylglucosamine acyltransferase [EC:2.3.1.129]	ec:2.3.1.129	K00677	---	---	1	1	1	1	1	2	0	0	1	1	1	1	0	1	1	0	1	1	1	1	1	1	1	1	1	1	1	1	1	1	1	1	1	1	1
	686	M00866	KDO2-lipid A biosynthesis, Raetz pathway, non-LpxL-LpxM type	map01503	Cationic antimicrobial peptide (CAMP) resistance	---	---	---	lpxA	UDP-N-acetylglucosamine acyltransferase [EC:2.3.1.129]	ec:2.3.1.129	K00677	---	---	1	1	1	1	1	2	0	0	1	1	1	1	0	1	1	0	1	1	1	1	1	1	1	1	1	1	1	1	1	1	1	1	1	1	1
	687	M00866	KDO2-lipid A biosynthesis, Raetz pathway, non-LpxL-LpxM type	map00540	Lipopolysaccharide biosynthesis	---	---	---	lpxI	UDP-2,3-diacylglucosamine hydrolase [EC:3.6.1.54]	ec:3.6.1.54	K09949	---	---	1	0	0	1	1	0	0	0	0	0	0	1	0	1	1	0	1	0	0	0	1	1	0	1	1	0	0	0	0	1	0	0	0	1	1
	688	M00866	KDO2-lipid A biosynthesis, Raetz pathway, non-LpxL-LpxM type	map01100	Metabolic pathways	---	---	---	lpxI	UDP-2,3-diacylglucosamine hydrolase [EC:3.6.1.54]	ec:3.6.1.54	K09949	---	---	1	0	0	1	1	0	0	0	0	0	0	1	0	1	1	0	1	0	0	0	1	1	0	1	1	0	0	0	0	1	0	0	0	1	1
	689	M00866	KDO2-lipid A biosynthesis, Raetz pathway, non-LpxL-LpxM type	map00540	Lipopolysaccharide biosynthesis	---	---	---	lpxB	lipid-A-disaccharide synthase [EC:2.4.1.182]	ec:2.4.1.182	K00748	---	---	1	1	1	1	1	2	0	0	1	0	1	1	0	1	1	0	1	1	1	1	1	1	1	1	0	1	1	1	1	1	1	1	1	1	1
	690	M00866	KDO2-lipid A biosynthesis, Raetz pathway, non-LpxL-LpxM type	map01100	Metabolic pathways	---	---	---	lpxB	lipid-A-disaccharide synthase [EC:2.4.1.182]	ec:2.4.1.182	K00748	---	---	1	1	1	1	1	2	0	0	1	0	1	1	0	1	1	0	1	1	1	1	1	1	1	1	0	1	1	1	1	1	1	1	1	1	1
	691	M00866	KDO2-lipid A biosynthesis, Raetz pathway, non-LpxL-LpxM type	map00540	Lipopolysaccharide biosynthesis	---	---	---	lpxH	UDP-2,3-diacylglucosamine hydrolase [EC:3.6.1.54]	ec:3.6.1.54	K03269	---	---	0	2	1	0	0	0	1	0	1	1	1	1	1	1	0	1	0	2	2	1	0	1	1	0	0	1	1	2	2	0	1	2	2	1	1
	692	M00866	KDO2-lipid A biosynthesis, Raetz pathway, non-LpxL-LpxM type	map01100	Metabolic pathways	---	---	---	lpxH	UDP-2,3-diacylglucosamine hydrolase [EC:3.6.1.54]	ec:3.6.1.54	K03269	---	---	0	2	1	0	0	0	1	0	1	1	1	1	1	1	0	1	0	2	2	1	0	1	1	0	0	1	1	2	2	0	1	2	2	1	1
	693	M00866	KDO2-lipid A biosynthesis, Raetz pathway, non-LpxL-LpxM type	map00540	Lipopolysaccharide biosynthesis	---	---	---	lpxJ	Kdo2-lipid IVA 3' secondary acyltransferase [EC:2.3.1.-]	---	K09778	---	---	0	0	0	0	1	0	0	0	0	0	0	1	1	0	0	0	0	0	0	0	0	0	0	0	0	0	0	0	0	0	0	0	0	0	0
	694	M00866	KDO2-lipid A biosynthesis, Raetz pathway, non-LpxL-LpxM type	map01100	Metabolic pathways	---	---	---	lpxJ	Kdo2-lipid IVA 3' secondary acyltransferase [EC:2.3.1.-]	---	K09778	---	---	0	0	0	0	1	0	0	0	0	0	0	1	1	0	0	0	0	0	0	0	0	0	0	0	0	0	0	0	0	0	0	0	0	0	0
	695	M00866	KDO2-lipid A biosynthesis, Raetz pathway, non-LpxL-LpxM type	map00061	Fatty acid biosynthesis	---	---	---	lpxC-fabZ	UDP-3-O-[3-hydroxymyristoyl] N-acetylglucosamine deacetylase / 3-hydroxyacyl-[acyl-carrier-protein] dehydratase [EC:3.5.1.108 4.2.1.59]	ec:3.5.1.108	K16363	---	---	0	0	0	0	0	0	0	0	0	1	0	0	0	0	0	0	0	0	1	0	0	0	0	0	0	1	0	1	0	0	0	0	0	0	0
	696	M00866	KDO2-lipid A biosynthesis, Raetz pathway, non-LpxL-LpxM type	map00061	Fatty acid biosynthesis	---	---	---	lpxC-fabZ	UDP-3-O-[3-hydroxymyristoyl] N-acetylglucosamine deacetylase / 3-hydroxyacyl-[acyl-carrier-protein] dehydratase [EC:3.5.1.108 4.2.1.59]	ec:4.2.1.59	K16363	---	---	0	0	0	0	0	0	0	0	0	1	0	0	0	0	0	0	0	0	1	0	0	0	0	0	0	1	0	1	0	0	0	0	0	0	0
	697	M00866	KDO2-lipid A biosynthesis, Raetz pathway, non-LpxL-LpxM type	map00540	Lipopolysaccharide biosynthesis	---	---	---	lpxC-fabZ	UDP-3-O-[3-hydroxymyristoyl] N-acetylglucosamine deacetylase / 3-hydroxyacyl-[acyl-carrier-protein] dehydratase [EC:3.5.1.108 4.2.1.59]	ec:3.5.1.108	K16363	---	---	0	0	0	0	0	0	0	0	0	1	0	0	0	0	0	0	0	0	1	0	0	0	0	0	0	1	0	1	0	0	0	0	0	0	0
	698	M00866	KDO2-lipid A biosynthesis, Raetz pathway, non-LpxL-LpxM type	map00540	Lipopolysaccharide biosynthesis	---	---	---	lpxC-fabZ	UDP-3-O-[3-hydroxymyristoyl] N-acetylglucosamine deacetylase / 3-hydroxyacyl-[acyl-carrier-protein] dehydratase [EC:3.5.1.108 4.2.1.59]	ec:4.2.1.59	K16363	---	---	0	0	0	0	0	0	0	0	0	1	0	0	0	0	0	0	0	0	1	0	0	0	0	0	0	1	0	1	0	0	0	0	0	0	0
	699	M00866	KDO2-lipid A biosynthesis, Raetz pathway, non-LpxL-LpxM type	map01100	Metabolic pathways	---	---	---	lpxC-fabZ	UDP-3-O-[3-hydroxymyristoyl] N-acetylglucosamine deacetylase / 3-hydroxyacyl-[acyl-carrier-protein] dehydratase [EC:3.5.1.108 4.2.1.59]	ec:3.5.1.108	K16363	---	---	0	0	0	0	0	0	0	0	0	1	0	0	0	0	0	0	0	0	1	0	0	0	0	0	0	1	0	1	0	0	0	0	0	0	0
	700	M00866	KDO2-lipid A biosynthesis, Raetz pathway, non-LpxL-LpxM type	map01100	Metabolic pathways	---	---	---	lpxC-fabZ	UDP-3-O-[3-hydroxymyristoyl] N-acetylglucosamine deacetylase / 3-hydroxyacyl-[acyl-carrier-protein] dehydratase [EC:3.5.1.108 4.2.1.59]	ec:4.2.1.59	K16363	---	---	0	0	0	0	0	0	0	0	0	1	0	0	0	0	0	0	0	0	1	0	0	0	0	0	0	1	0	1	0	0	0	0	0	0	0
	701	M00866	KDO2-lipid A biosynthesis, Raetz pathway, non-LpxL-LpxM type	map01212	Fatty acid metabolism	---	---	---	lpxC-fabZ	UDP-3-O-[3-hydroxymyristoyl] N-acetylglucosamine deacetylase / 3-hydroxyacyl-[acyl-carrier-protein] dehydratase [EC:3.5.1.108 4.2.1.59]	ec:3.5.1.108	K16363	---	---	0	0	0	0	0	0	0	0	0	1	0	0	0	0	0	0	0	0	1	0	0	0	0	0	0	1	0	1	0	0	0	0	0	0	0
	702	M00866	KDO2-lipid A biosynthesis, Raetz pathway, non-LpxL-LpxM type	map01212	Fatty acid metabolism	---	---	---	lpxC-fabZ	UDP-3-O-[3-hydroxymyristoyl] N-acetylglucosamine deacetylase / 3-hydroxyacyl-[acyl-carrier-protein] dehydratase [EC:3.5.1.108 4.2.1.59]	ec:4.2.1.59	K16363	---	---	0	0	0	0	0	0	0	0	0	1	0	0	0	0	0	0	0	0	1	0	0	0	0	0	0	1	0	1	0	0	0	0	0	0	0
	703	M00862	beta-Oxidation, peroxisome, tri/dihydroxycholestanoyl-CoA => choloyl/chenodeoxycholoyl-CoA	map00120	Primary bile acid biosynthesis	---	---	---	SCP2, SCPX	sterol carrier protein 2 [EC:2.3.1.176]	ec:2.3.1.176	K08764	---	---	0	0	1	0	0	0	0	0	0	0	0	0	0	0	0	0	0	0	0	0	0	0	0	0	0	0	0	0	0	0	0	0	0	0	0
	704	M00862	beta-Oxidation, peroxisome, tri/dihydroxycholestanoyl-CoA => choloyl/chenodeoxycholoyl-CoA	map01040	Biosynthesis of unsaturated fatty acids	---	---	---	SCP2, SCPX	sterol carrier protein 2 [EC:2.3.1.176]	ec:2.3.1.176	K08764	---	---	0	0	1	0	0	0	0	0	0	0	0	0	0	0	0	0	0	0	0	0	0	0	0	0	0	0	0	0	0	0	0	0	0	0	0
	705	M00862	beta-Oxidation, peroxisome, tri/dihydroxycholestanoyl-CoA => choloyl/chenodeoxycholoyl-CoA	map01100	Metabolic pathways	---	---	---	SCP2, SCPX	sterol carrier protein 2 [EC:2.3.1.176]	ec:2.3.1.176	K08764	---	---	0	0	1	0	0	0	0	0	0	0	0	0	0	0	0	0	0	0	0	0	0	0	0	0	0	0	0	0	0	0	0	0	0	0	0
	706	M00862	beta-Oxidation, peroxisome, tri/dihydroxycholestanoyl-CoA => choloyl/chenodeoxycholoyl-CoA	map01212	Fatty acid metabolism	---	---	---	SCP2, SCPX	sterol carrier protein 2 [EC:2.3.1.176]	ec:2.3.1.176	K08764	---	---	0	0	1	0	0	0	0	0	0	0	0	0	0	0	0	0	0	0	0	0	0	0	0	0	0	0	0	0	0	0	0	0	0	0	0
	707	M00862	beta-Oxidation, peroxisome, tri/dihydroxycholestanoyl-CoA => choloyl/chenodeoxycholoyl-CoA	map03320	PPAR signaling pathway	---	---	---	SCP2, SCPX	sterol carrier protein 2 [EC:2.3.1.176]	ec:2.3.1.176	K08764	---	---	0	0	1	0	0	0	0	0	0	0	0	0	0	0	0	0	0	0	0	0	0	0	0	0	0	0	0	0	0	0	0	0	0	0	0
	708	M00862	beta-Oxidation, peroxisome, tri/dihydroxycholestanoyl-CoA => choloyl/chenodeoxycholoyl-CoA	map04146	Peroxisome	---	---	---	SCP2, SCPX	sterol carrier protein 2 [EC:2.3.1.176]	ec:2.3.1.176	K08764	---	---	0	0	1	0	0	0	0	0	0	0	0	0	0	0	0	0	0	0	0	0	0	0	0	0	0	0	0	0	0	0	0	0	0	0	0
	709	M00861	beta-Oxidation, peroxisome, VLCFA	map00120	Primary bile acid biosynthesis	---	---	---	SCP2, SCPX	sterol carrier protein 2 [EC:2.3.1.176]	ec:2.3.1.176	K08764	---	---	0	0	1	0	0	0	0	0	0	0	0	0	0	0	0	0	0	0	0	0	0	0	0	0	0	0	0	0	0	0	0	0	0	0	0
	710	M00861	beta-Oxidation, peroxisome, VLCFA	map01040	Biosynthesis of unsaturated fatty acids	---	---	---	SCP2, SCPX	sterol carrier protein 2 [EC:2.3.1.176]	ec:2.3.1.176	K08764	---	---	0	0	1	0	0	0	0	0	0	0	0	0	0	0	0	0	0	0	0	0	0	0	0	0	0	0	0	0	0	0	0	0	0	0	0
	711	M00861	beta-Oxidation, peroxisome, VLCFA	map01100	Metabolic pathways	---	---	---	SCP2, SCPX	sterol carrier protein 2 [EC:2.3.1.176]	ec:2.3.1.176	K08764	---	---	0	0	1	0	0	0	0	0	0	0	0	0	0	0	0	0	0	0	0	0	0	0	0	0	0	0	0	0	0	0	0	0	0	0	0
	712	M00861	beta-Oxidation, peroxisome, VLCFA	map01212	Fatty acid metabolism	---	---	---	SCP2, SCPX	sterol carrier protein 2 [EC:2.3.1.176]	ec:2.3.1.176	K08764	---	---	0	0	1	0	0	0	0	0	0	0	0	0	0	0	0	0	0	0	0	0	0	0	0	0	0	0	0	0	0	0	0	0	0	0	0
	713	M00861	beta-Oxidation, peroxisome, VLCFA	map03320	PPAR signaling pathway	---	---	---	SCP2, SCPX	sterol carrier protein 2 [EC:2.3.1.176]	ec:2.3.1.176	K08764	---	---	0	0	1	0	0	0	0	0	0	0	0	0	0	0	0	0	0	0	0	0	0	0	0	0	0	0	0	0	0	0	0	0	0	0	0
	714	M00861	beta-Oxidation, peroxisome, VLCFA	map04146	Peroxisome	---	---	---	SCP2, SCPX	sterol carrier protein 2 [EC:2.3.1.176]	ec:2.3.1.176	K08764	---	---	0	0	1	0	0	0	0	0	0	0	0	0	0	0	0	0	0	0	0	0	0	0	0	0	0	0	0	0	0	0	0	0	0	0	0
	715	M00855	Glycogen degradation, glycogen => glucose-6P	map00500	Starch and sucrose metabolism	---	---	---	PYG, glgP	glycogen phosphorylase [EC:2.4.1.1]	ec:2.4.1.1	K00688	---	---	1	0	0	0	0	1	0	0	0	0	0	0	0	0	0	0	1	0	0	0	0	0	0	0	0	0	1	0	1	1	0	1	0	0	0
	716	M00855	Glycogen degradation, glycogen => glucose-6P	map01100	Metabolic pathways	---	---	---	PYG, glgP	glycogen phosphorylase [EC:2.4.1.1]	ec:2.4.1.1	K00688	---	---	1	0	0	0	0	1	0	0	0	0	0	0	0	0	0	0	1	0	0	0	0	0	0	0	0	0	1	0	1	1	0	1	0	0	0
	717	M00855	Glycogen degradation, glycogen => glucose-6P	map01110	Biosynthesis of secondary metabolites	---	---	---	PYG, glgP	glycogen phosphorylase [EC:2.4.1.1]	ec:2.4.1.1	K00688	---	---	1	0	0	0	0	1	0	0	0	0	0	0	0	0	0	0	1	0	0	0	0	0	0	0	0	0	1	0	1	1	0	1	0	0	0
	718	M00855	Glycogen degradation, glycogen => glucose-6P	map02026	Biofilm formation - Escherichia coli	---	---	---	PYG, glgP	glycogen phosphorylase [EC:2.4.1.1]	ec:2.4.1.1	K00688	---	---	1	0	0	0	0	1	0	0	0	0	0	0	0	0	0	0	1	0	0	0	0	0	0	0	0	0	1	0	1	1	0	1	0	0	0
	719	M00855	Glycogen degradation, glycogen => glucose-6P	map04217	Necroptosis	---	---	---	PYG, glgP	glycogen phosphorylase [EC:2.4.1.1]	ec:2.4.1.1	K00688	---	---	1	0	0	0	0	1	0	0	0	0	0	0	0	0	0	0	1	0	0	0	0	0	0	0	0	0	1	0	1	1	0	1	0	0	0
	720	M00855	Glycogen degradation, glycogen => glucose-6P	map04910	Insulin signaling pathway	---	---	---	PYG, glgP	glycogen phosphorylase [EC:2.4.1.1]	ec:2.4.1.1	K00688	---	---	1	0	0	0	0	1	0	0	0	0	0	0	0	0	0	0	1	0	0	0	0	0	0	0	0	0	1	0	1	1	0	1	0	0	0
	721	M00855	Glycogen degradation, glycogen => glucose-6P	map04922	Glucagon signaling pathway	---	---	---	PYG, glgP	glycogen phosphorylase [EC:2.4.1.1]	ec:2.4.1.1	K00688	---	---	1	0	0	0	0	1	0	0	0	0	0	0	0	0	0	0	1	0	0	0	0	0	0	0	0	0	1	0	1	1	0	1	0	0	0
	722	M00855	Glycogen degradation, glycogen => glucose-6P	map04931	Insulin resistance	---	---	---	PYG, glgP	glycogen phosphorylase [EC:2.4.1.1]	ec:2.4.1.1	K00688	---	---	1	0	0	0	0	1	0	0	0	0	0	0	0	0	0	0	1	0	0	0	0	0	0	0	0	0	1	0	1	1	0	1	0	0	0
	723	M00855	Glycogen degradation, glycogen => glucose-6P	map00500	Starch and sucrose metabolism	---	---	---	pulA	pullulanase [EC:3.2.1.41]	ec:3.2.1.41	K01200	---	---	0	1	0	0	0	0	0	0	0	0	0	0	0	0	0	0	0	1	0	0	0	0	0	0	0	0	0	0	1	0	0	1	1	0	0
	724	M00855	Glycogen degradation, glycogen => glucose-6P	map01100	Metabolic pathways	---	---	---	pulA	pullulanase [EC:3.2.1.41]	ec:3.2.1.41	K01200	---	---	0	1	0	0	0	0	0	0	0	0	0	0	0	0	0	0	0	1	0	0	0	0	0	0	0	0	0	0	1	0	0	1	1	0	0
	725	M00855	Glycogen degradation, glycogen => glucose-6P	map01110	Biosynthesis of secondary metabolites	---	---	---	pulA	pullulanase [EC:3.2.1.41]	ec:3.2.1.41	K01200	---	---	0	1	0	0	0	0	0	0	0	0	0	0	0	0	0	0	0	1	0	0	0	0	0	0	0	0	0	0	1	0	0	1	1	0	0
	726	M00855	Glycogen degradation, glycogen => glucose-6P	map00010	Glycolysis / Gluconeogenesis	---	---	---	pmm-pgm	phosphomannomutase / phosphoglucomutase [EC:5.4.2.8 5.4.2.2]	ec:5.4.2.8	K15778	---	---	0	1	2	0	0	1	1	0	2	0	1	0	0	1	0	0	0	1	0	1	0	1	1	0	0	0	1	0	0	0	2	0	1	1	1
	727	M00855	Glycogen degradation, glycogen => glucose-6P	map00010	Glycolysis / Gluconeogenesis	---	---	---	pmm-pgm	phosphomannomutase / phosphoglucomutase [EC:5.4.2.8 5.4.2.2]	ec:5.4.2.2	K15778	---	---	0	1	2	0	0	1	1	0	2	0	1	0	0	1	0	0	0	1	0	1	0	1	1	0	0	0	1	0	0	0	2	0	1	1	1
	728	M00855	Glycogen degradation, glycogen => glucose-6P	map00030	Pentose phosphate pathway	---	---	---	pmm-pgm	phosphomannomutase / phosphoglucomutase [EC:5.4.2.8 5.4.2.2]	ec:5.4.2.8	K15778	---	---	0	1	2	0	0	1	1	0	2	0	1	0	0	1	0	0	0	1	0	1	0	1	1	0	0	0	1	0	0	0	2	0	1	1	1
	729	M00855	Glycogen degradation, glycogen => glucose-6P	map00030	Pentose phosphate pathway	---	---	---	pmm-pgm	phosphomannomutase / phosphoglucomutase [EC:5.4.2.8 5.4.2.2]	ec:5.4.2.2	K15778	---	---	0	1	2	0	0	1	1	0	2	0	1	0	0	1	0	0	0	1	0	1	0	1	1	0	0	0	1	0	0	0	2	0	1	1	1
	730	M00855	Glycogen degradation, glycogen => glucose-6P	map00051	Fructose and mannose metabolism	---	---	---	pmm-pgm	phosphomannomutase / phosphoglucomutase [EC:5.4.2.8 5.4.2.2]	ec:5.4.2.8	K15778	---	---	0	1	2	0	0	1	1	0	2	0	1	0	0	1	0	0	0	1	0	1	0	1	1	0	0	0	1	0	0	0	2	0	1	1	1
	731	M00855	Glycogen degradation, glycogen => glucose-6P	map00051	Fructose and mannose metabolism	---	---	---	pmm-pgm	phosphomannomutase / phosphoglucomutase [EC:5.4.2.8 5.4.2.2]	ec:5.4.2.2	K15778	---	---	0	1	2	0	0	1	1	0	2	0	1	0	0	1	0	0	0	1	0	1	0	1	1	0	0	0	1	0	0	0	2	0	1	1	1
	732	M00855	Glycogen degradation, glycogen => glucose-6P	map00052	Galactose metabolism	---	---	---	pmm-pgm	phosphomannomutase / phosphoglucomutase [EC:5.4.2.8 5.4.2.2]	ec:5.4.2.8	K15778	---	---	0	1	2	0	0	1	1	0	2	0	1	0	0	1	0	0	0	1	0	1	0	1	1	0	0	0	1	0	0	0	2	0	1	1	1
	733	M00855	Glycogen degradation, glycogen => glucose-6P	map00052	Galactose metabolism	---	---	---	pmm-pgm	phosphomannomutase / phosphoglucomutase [EC:5.4.2.8 5.4.2.2]	ec:5.4.2.2	K15778	---	---	0	1	2	0	0	1	1	0	2	0	1	0	0	1	0	0	0	1	0	1	0	1	1	0	0	0	1	0	0	0	2	0	1	1	1
	734	M00855	Glycogen degradation, glycogen => glucose-6P	map00230	Purine metabolism	---	---	---	pmm-pgm	phosphomannomutase / phosphoglucomutase [EC:5.4.2.8 5.4.2.2]	ec:5.4.2.8	K15778	---	---	0	1	2	0	0	1	1	0	2	0	1	0	0	1	0	0	0	1	0	1	0	1	1	0	0	0	1	0	0	0	2	0	1	1	1
	735	M00855	Glycogen degradation, glycogen => glucose-6P	map00230	Purine metabolism	---	---	---	pmm-pgm	phosphomannomutase / phosphoglucomutase [EC:5.4.2.8 5.4.2.2]	ec:5.4.2.2	K15778	---	---	0	1	2	0	0	1	1	0	2	0	1	0	0	1	0	0	0	1	0	1	0	1	1	0	0	0	1	0	0	0	2	0	1	1	1
	736	M00855	Glycogen degradation, glycogen => glucose-6P	map00500	Starch and sucrose metabolism	---	---	---	pmm-pgm	phosphomannomutase / phosphoglucomutase [EC:5.4.2.8 5.4.2.2]	ec:5.4.2.8	K15778	---	---	0	1	2	0	0	1	1	0	2	0	1	0	0	1	0	0	0	1	0	1	0	1	1	0	0	0	1	0	0	0	2	0	1	1	1
	737	M00855	Glycogen degradation, glycogen => glucose-6P	map00500	Starch and sucrose metabolism	---	---	---	pmm-pgm	phosphomannomutase / phosphoglucomutase [EC:5.4.2.8 5.4.2.2]	ec:5.4.2.2	K15778	---	---	0	1	2	0	0	1	1	0	2	0	1	0	0	1	0	0	0	1	0	1	0	1	1	0	0	0	1	0	0	0	2	0	1	1	1
	738	M00855	Glycogen degradation, glycogen => glucose-6P	map00520	Amino sugar and nucleotide sugar metabolism	---	---	---	pmm-pgm	phosphomannomutase / phosphoglucomutase [EC:5.4.2.8 5.4.2.2]	ec:5.4.2.8	K15778	---	---	0	1	2	0	0	1	1	0	2	0	1	0	0	1	0	0	0	1	0	1	0	1	1	0	0	0	1	0	0	0	2	0	1	1	1
	739	M00855	Glycogen degradation, glycogen => glucose-6P	map00520	Amino sugar and nucleotide sugar metabolism	---	---	---	pmm-pgm	phosphomannomutase / phosphoglucomutase [EC:5.4.2.8 5.4.2.2]	ec:5.4.2.2	K15778	---	---	0	1	2	0	0	1	1	0	2	0	1	0	0	1	0	0	0	1	0	1	0	1	1	0	0	0	1	0	0	0	2	0	1	1	1
	740	M00855	Glycogen degradation, glycogen => glucose-6P	map00521	Streptomycin biosynthesis	---	---	---	pmm-pgm	phosphomannomutase / phosphoglucomutase [EC:5.4.2.8 5.4.2.2]	ec:5.4.2.8	K15778	---	---	0	1	2	0	0	1	1	0	2	0	1	0	0	1	0	0	0	1	0	1	0	1	1	0	0	0	1	0	0	0	2	0	1	1	1
	741	M00855	Glycogen degradation, glycogen => glucose-6P	map00521	Streptomycin biosynthesis	---	---	---	pmm-pgm	phosphomannomutase / phosphoglucomutase [EC:5.4.2.8 5.4.2.2]	ec:5.4.2.2	K15778	---	---	0	1	2	0	0	1	1	0	2	0	1	0	0	1	0	0	0	1	0	1	0	1	1	0	0	0	1	0	0	0	2	0	1	1	1
	742	M00855	Glycogen degradation, glycogen => glucose-6P	map01100	Metabolic pathways	---	---	---	pmm-pgm	phosphomannomutase / phosphoglucomutase [EC:5.4.2.8 5.4.2.2]	ec:5.4.2.8	K15778	---	---	0	1	2	0	0	1	1	0	2	0	1	0	0	1	0	0	0	1	0	1	0	1	1	0	0	0	1	0	0	0	2	0	1	1	1
	743	M00855	Glycogen degradation, glycogen => glucose-6P	map01100	Metabolic pathways	---	---	---	pmm-pgm	phosphomannomutase / phosphoglucomutase [EC:5.4.2.8 5.4.2.2]	ec:5.4.2.2	K15778	---	---	0	1	2	0	0	1	1	0	2	0	1	0	0	1	0	0	0	1	0	1	0	1	1	0	0	0	1	0	0	0	2	0	1	1	1
	744	M00855	Glycogen degradation, glycogen => glucose-6P	map01110	Biosynthesis of secondary metabolites	---	---	---	pmm-pgm	phosphomannomutase / phosphoglucomutase [EC:5.4.2.8 5.4.2.2]	ec:5.4.2.8	K15778	---	---	0	1	2	0	0	1	1	0	2	0	1	0	0	1	0	0	0	1	0	1	0	1	1	0	0	0	1	0	0	0	2	0	1	1	1
	745	M00855	Glycogen degradation, glycogen => glucose-6P	map01110	Biosynthesis of secondary metabolites	---	---	---	pmm-pgm	phosphomannomutase / phosphoglucomutase [EC:5.4.2.8 5.4.2.2]	ec:5.4.2.2	K15778	---	---	0	1	2	0	0	1	1	0	2	0	1	0	0	1	0	0	0	1	0	1	0	1	1	0	0	0	1	0	0	0	2	0	1	1	1
	746	M00855	Glycogen degradation, glycogen => glucose-6P	map01120	Microbial metabolism in diverse environments	---	---	---	pmm-pgm	phosphomannomutase / phosphoglucomutase [EC:5.4.2.8 5.4.2.2]	ec:5.4.2.8	K15778	---	---	0	1	2	0	0	1	1	0	2	0	1	0	0	1	0	0	0	1	0	1	0	1	1	0	0	0	1	0	0	0	2	0	1	1	1
	747	M00855	Glycogen degradation, glycogen => glucose-6P	map01120	Microbial metabolism in diverse environments	---	---	---	pmm-pgm	phosphomannomutase / phosphoglucomutase [EC:5.4.2.8 5.4.2.2]	ec:5.4.2.2	K15778	---	---	0	1	2	0	0	1	1	0	2	0	1	0	0	1	0	0	0	1	0	1	0	1	1	0	0	0	1	0	0	0	2	0	1	1	1
	748	M00855	Glycogen degradation, glycogen => glucose-6P	map00010	Glycolysis / Gluconeogenesis	---	---	---	pgm	phosphoglucomutase [EC:5.4.2.2]	ec:5.4.2.2	K01835	---	---	0	0	0	0	0	1	1	0	0	0	0	0	0	0	1	0	0	0	0	0	1	0	1	0	0	0	1	0	1	0	0	0	0	0	0
	749	M00855	Glycogen degradation, glycogen => glucose-6P	map00030	Pentose phosphate pathway	---	---	---	pgm	phosphoglucomutase [EC:5.4.2.2]	ec:5.4.2.2	K01835	---	---	0	0	0	0	0	1	1	0	0	0	0	0	0	0	1	0	0	0	0	0	1	0	1	0	0	0	1	0	1	0	0	0	0	0	0
	750	M00855	Glycogen degradation, glycogen => glucose-6P	map00052	Galactose metabolism	---	---	---	pgm	phosphoglucomutase [EC:5.4.2.2]	ec:5.4.2.2	K01835	---	---	0	0	0	0	0	1	1	0	0	0	0	0	0	0	1	0	0	0	0	0	1	0	1	0	0	0	1	0	1	0	0	0	0	0	0
	751	M00855	Glycogen degradation, glycogen => glucose-6P	map00230	Purine metabolism	---	---	---	pgm	phosphoglucomutase [EC:5.4.2.2]	ec:5.4.2.2	K01835	---	---	0	0	0	0	0	1	1	0	0	0	0	0	0	0	1	0	0	0	0	0	1	0	1	0	0	0	1	0	1	0	0	0	0	0	0
	752	M00855	Glycogen degradation, glycogen => glucose-6P	map00500	Starch and sucrose metabolism	---	---	---	pgm	phosphoglucomutase [EC:5.4.2.2]	ec:5.4.2.2	K01835	---	---	0	0	0	0	0	1	1	0	0	0	0	0	0	0	1	0	0	0	0	0	1	0	1	0	0	0	1	0	1	0	0	0	0	0	0
	753	M00855	Glycogen degradation, glycogen => glucose-6P	map00520	Amino sugar and nucleotide sugar metabolism	---	---	---	pgm	phosphoglucomutase [EC:5.4.2.2]	ec:5.4.2.2	K01835	---	---	0	0	0	0	0	1	1	0	0	0	0	0	0	0	1	0	0	0	0	0	1	0	1	0	0	0	1	0	1	0	0	0	0	0	0
	754	M00855	Glycogen degradation, glycogen => glucose-6P	map00521	Streptomycin biosynthesis	---	---	---	pgm	phosphoglucomutase [EC:5.4.2.2]	ec:5.4.2.2	K01835	---	---	0	0	0	0	0	1	1	0	0	0	0	0	0	0	1	0	0	0	0	0	1	0	1	0	0	0	1	0	1	0	0	0	0	0	0
	755	M00855	Glycogen degradation, glycogen => glucose-6P	map01100	Metabolic pathways	---	---	---	pgm	phosphoglucomutase [EC:5.4.2.2]	ec:5.4.2.2	K01835	---	---	0	0	0	0	0	1	1	0	0	0	0	0	0	0	1	0	0	0	0	0	1	0	1	0	0	0	1	0	1	0	0	0	0	0	0
	756	M00855	Glycogen degradation, glycogen => glucose-6P	map01110	Biosynthesis of secondary metabolites	---	---	---	pgm	phosphoglucomutase [EC:5.4.2.2]	ec:5.4.2.2	K01835	---	---	0	0	0	0	0	1	1	0	0	0	0	0	0	0	1	0	0	0	0	0	1	0	1	0	0	0	1	0	1	0	0	0	0	0	0
	757	M00855	Glycogen degradation, glycogen => glucose-6P	map01120	Microbial metabolism in diverse environments	---	---	---	pgm	phosphoglucomutase [EC:5.4.2.2]	ec:5.4.2.2	K01835	---	---	0	0	0	0	0	1	1	0	0	0	0	0	0	0	1	0	0	0	0	0	1	0	1	0	0	0	1	0	1	0	0	0	0	0	0
	758	M00855	Glycogen degradation, glycogen => glucose-6P	map00500	Starch and sucrose metabolism	---	---	---	malQ	4-alpha-glucanotransferase [EC:2.4.1.25]	ec:2.4.1.25	K00705	---	---	0	0	0	0	0	0	0	0	0	0	0	0	0	0	0	1	0	0	0	0	0	0	0	0	0	0	0	0	1	1	0	1	0	0	0
	759	M00855	Glycogen degradation, glycogen => glucose-6P	map01100	Metabolic pathways	---	---	---	malQ	4-alpha-glucanotransferase [EC:2.4.1.25]	ec:2.4.1.25	K00705	---	---	0	0	0	0	0	0	0	0	0	0	0	0	0	0	0	1	0	0	0	0	0	0	0	0	0	0	0	0	1	1	0	1	0	0	0
	760	M00855	Glycogen degradation, glycogen => glucose-6P	map01110	Biosynthesis of secondary metabolites	---	---	---	malQ	4-alpha-glucanotransferase [EC:2.4.1.25]	ec:2.4.1.25	K00705	---	---	0	0	0	0	0	0	0	0	0	0	0	0	0	0	0	1	0	0	0	0	0	0	0	0	0	0	0	0	1	1	0	1	0	0	0
	761	M00854	Glycogen biosynthesis, glucose-1P => glycogen/starch	map00500	Starch and sucrose metabolism	---	---	---	glgC	glucose-1-phosphate adenylyltransferase [EC:2.7.7.27]	ec:2.7.7.27	K00975	---	---	2	0	0	0	0	0	0	0	0	0	0	0	0	0	1	1	2	0	0	0	1	0	0	0	0	1	0	1	1	2	0	1	0	0	0
	762	M00854	Glycogen biosynthesis, glucose-1P => glycogen/starch	map00520	Amino sugar and nucleotide sugar metabolism	---	---	---	glgC	glucose-1-phosphate adenylyltransferase [EC:2.7.7.27]	ec:2.7.7.27	K00975	---	---	2	0	0	0	0	0	0	0	0	0	0	0	0	0	1	1	2	0	0	0	1	0	0	0	0	1	0	1	1	2	0	1	0	0	0
	763	M00854	Glycogen biosynthesis, glucose-1P => glycogen/starch	map01100	Metabolic pathways	---	---	---	glgC	glucose-1-phosphate adenylyltransferase [EC:2.7.7.27]	ec:2.7.7.27	K00975	---	---	2	0	0	0	0	0	0	0	0	0	0	0	0	0	1	1	2	0	0	0	1	0	0	0	0	1	0	1	1	2	0	1	0	0	0
	764	M00854	Glycogen biosynthesis, glucose-1P => glycogen/starch	map01110	Biosynthesis of secondary metabolites	---	---	---	glgC	glucose-1-phosphate adenylyltransferase [EC:2.7.7.27]	ec:2.7.7.27	K00975	---	---	2	0	0	0	0	0	0	0	0	0	0	0	0	0	1	1	2	0	0	0	1	0	0	0	0	1	0	1	1	2	0	1	0	0	0
	765	M00854	Glycogen biosynthesis, glucose-1P => glycogen/starch	map02026	Biofilm formation - Escherichia coli	---	---	---	glgC	glucose-1-phosphate adenylyltransferase [EC:2.7.7.27]	ec:2.7.7.27	K00975	---	---	2	0	0	0	0	0	0	0	0	0	0	0	0	0	1	1	2	0	0	0	1	0	0	0	0	1	0	1	1	2	0	1	0	0	0
	766	M00854	Glycogen biosynthesis, glucose-1P => glycogen/starch	map00500	Starch and sucrose metabolism	---	---	---	glgA	starch synthase [EC:2.4.1.21]	ec:2.4.1.21	K00703	---	---	1	0	0	0	0	0	0	0	0	0	0	0	0	0	1	0	1	0	0	0	1	0	0	0	0	1	0	1	1	1	0	1	0	0	0
	767	M00854	Glycogen biosynthesis, glucose-1P => glycogen/starch	map01100	Metabolic pathways	---	---	---	glgA	starch synthase [EC:2.4.1.21]	ec:2.4.1.21	K00703	---	---	1	0	0	0	0	0	0	0	0	0	0	0	0	0	1	0	1	0	0	0	1	0	0	0	0	1	0	1	1	1	0	1	0	0	0
	768	M00854	Glycogen biosynthesis, glucose-1P => glycogen/starch	map01110	Biosynthesis of secondary metabolites	---	---	---	glgA	starch synthase [EC:2.4.1.21]	ec:2.4.1.21	K00703	---	---	1	0	0	0	0	0	0	0	0	0	0	0	0	0	1	0	1	0	0	0	1	0	0	0	0	1	0	1	1	1	0	1	0	0	0
	769	M00854	Glycogen biosynthesis, glucose-1P => glycogen/starch	map02026	Biofilm formation - Escherichia coli	---	---	---	glgA	starch synthase [EC:2.4.1.21]	ec:2.4.1.21	K00703	---	---	1	0	0	0	0	0	0	0	0	0	0	0	0	0	1	0	1	0	0	0	1	0	0	0	0	1	0	1	1	1	0	1	0	0	0
	770	M00854	Glycogen biosynthesis, glucose-1P => glycogen/starch	map00500	Starch and sucrose metabolism	---	---	---	GBE1, glgB	1,4-alpha-glucan branching enzyme [EC:2.4.1.18]	ec:2.4.1.18	K00700	---	---	1	0	0	0	0	0	0	0	0	0	0	0	0	0	1	1	1	0	0	0	1	0	0	0	0	1	0	1	1	2	0	1	0	0	0
	771	M00854	Glycogen biosynthesis, glucose-1P => glycogen/starch	map01100	Metabolic pathways	---	---	---	GBE1, glgB	1,4-alpha-glucan branching enzyme [EC:2.4.1.18]	ec:2.4.1.18	K00700	---	---	1	0	0	0	0	0	0	0	0	0	0	0	0	0	1	1	1	0	0	0	1	0	0	0	0	1	0	1	1	2	0	1	0	0	0
	772	M00854	Glycogen biosynthesis, glucose-1P => glycogen/starch	map01110	Biosynthesis of secondary metabolites	---	---	---	GBE1, glgB	1,4-alpha-glucan branching enzyme [EC:2.4.1.18]	ec:2.4.1.18	K00700	---	---	1	0	0	0	0	0	0	0	0	0	0	0	0	0	1	1	1	0	0	0	1	0	0	0	0	1	0	1	1	2	0	1	0	0	0
	773	M00854	Glycogen biosynthesis, glucose-1P => glycogen/starch	map00040	Pentose and glucuronate interconversions	---	---	---	UGP2, galU, galF	UTP--glucose-1-phosphate uridylyltransferase [EC:2.7.7.9]	ec:2.7.7.9	K00963	---	---	1	0	0	1	1	1	1	0	1	0	1	1	0	0	1	1	1	0	0	1	1	0	0	1	0	0	1	0	1	1	1	1	0	0	0
	774	M00854	Glycogen biosynthesis, glucose-1P => glycogen/starch	map00052	Galactose metabolism	---	---	---	UGP2, galU, galF	UTP--glucose-1-phosphate uridylyltransferase [EC:2.7.7.9]	ec:2.7.7.9	K00963	---	---	1	0	0	1	1	1	1	0	1	0	1	1	0	0	1	1	1	0	0	1	1	0	0	1	0	0	1	0	1	1	1	1	0	0	0
	775	M00854	Glycogen biosynthesis, glucose-1P => glycogen/starch	map00500	Starch and sucrose metabolism	---	---	---	UGP2, galU, galF	UTP--glucose-1-phosphate uridylyltransferase [EC:2.7.7.9]	ec:2.7.7.9	K00963	---	---	1	0	0	1	1	1	1	0	1	0	1	1	0	0	1	1	1	0	0	1	1	0	0	1	0	0	1	0	1	1	1	1	0	0	0
	776	M00854	Glycogen biosynthesis, glucose-1P => glycogen/starch	map00520	Amino sugar and nucleotide sugar metabolism	---	---	---	UGP2, galU, galF	UTP--glucose-1-phosphate uridylyltransferase [EC:2.7.7.9]	ec:2.7.7.9	K00963	---	---	1	0	0	1	1	1	1	0	1	0	1	1	0	0	1	1	1	0	0	1	1	0	0	1	0	0	1	0	1	1	1	1	0	0	0
	777	M00854	Glycogen biosynthesis, glucose-1P => glycogen/starch	map00541	O-Antigen nucleotide sugar biosynthesis	---	---	---	UGP2, galU, galF	UTP--glucose-1-phosphate uridylyltransferase [EC:2.7.7.9]	ec:2.7.7.9	K00963	---	---	1	0	0	1	1	1	1	0	1	0	1	1	0	0	1	1	1	0	0	1	1	0	0	1	0	0	1	0	1	1	1	1	0	0	0
	778	M00854	Glycogen biosynthesis, glucose-1P => glycogen/starch	map01100	Metabolic pathways	---	---	---	UGP2, galU, galF	UTP--glucose-1-phosphate uridylyltransferase [EC:2.7.7.9]	ec:2.7.7.9	K00963	---	---	1	0	0	1	1	1	1	0	1	0	1	1	0	0	1	1	1	0	0	1	1	0	0	1	0	0	1	0	1	1	1	1	0	0	0
	779	M00854	Glycogen biosynthesis, glucose-1P => glycogen/starch	map01110	Biosynthesis of secondary metabolites	---	---	---	UGP2, galU, galF	UTP--glucose-1-phosphate uridylyltransferase [EC:2.7.7.9]	ec:2.7.7.9	K00963	---	---	1	0	0	1	1	1	1	0	1	0	1	1	0	0	1	1	1	0	0	1	1	0	0	1	0	0	1	0	1	1	1	1	0	0	0
	780	M00854	Glycogen biosynthesis, glucose-1P => glycogen/starch	map01240	Biosynthesis of cofactors	---	---	---	UGP2, galU, galF	UTP--glucose-1-phosphate uridylyltransferase [EC:2.7.7.9]	ec:2.7.7.9	K00963	---	---	1	0	0	1	1	1	1	0	1	0	1	1	0	0	1	1	1	0	0	1	1	0	0	1	0	0	1	0	1	1	1	1	0	0	0
	781	M00854	Glycogen biosynthesis, glucose-1P => glycogen/starch	map00500	Starch and sucrose metabolism	---	---	---	K16150	glycogen synthase [EC:2.4.1.11]	ec:2.4.1.11	K16150	---	---	0	0	0	0	0	0	0	0	0	0	0	0	1	0	0	0	0	0	0	0	0	0	0	0	0	0	0	0	0	0	0	0	0	0	0
	782	M00854	Glycogen biosynthesis, glucose-1P => glycogen/starch	map01100	Metabolic pathways	---	---	---	K16150	glycogen synthase [EC:2.4.1.11]	ec:2.4.1.11	K16150	---	---	0	0	0	0	0	0	0	0	0	0	0	0	1	0	0	0	0	0	0	0	0	0	0	0	0	0	0	0	0	0	0	0	0	0	0
	783	M00854	Glycogen biosynthesis, glucose-1P => glycogen/starch	map01110	Biosynthesis of secondary metabolites	---	---	---	K16150	glycogen synthase [EC:2.4.1.11]	ec:2.4.1.11	K16150	---	---	0	0	0	0	0	0	0	0	0	0	0	0	1	0	0	0	0	0	0	0	0	0	0	0	0	0	0	0	0	0	0	0	0	0	0
	784	M00850	Vibrio cholerae pathogenicity signature, cholera toxins	map05110	Vibrio cholerae infection	---	---	---	zot	zona occludens toxin	---	K10954	---	---	0	0	0	0	0	0	0	0	0	0	0	0	0	0	0	0	0	0	0	0	0	0	0	0	0	0	1	0	0	0	1	0	0	0	0
	785	M00849	C5 isoprenoid biosynthesis, mevalonate pathway, archaea	map00071	Fatty acid degradation	Carbon fixation	Hydroxypropionate-hydroxybutylate cycle	E2.3.1.9, atoB; acetyl-CoA C-acetyltransferase [EC:2.3.1.9]	ACAT, atoB	acetyl-CoA C-acetyltransferase [EC:2.3.1.9]	ec:2.3.1.9	K00626	---	---	4	11	9	5	5	3	5	5	8	2	5	9	6	7	9	3	4	12	2	7	7	7	5	5	3	3	5	2	4	5	8	4	11	9	9
	786	M00849	C5 isoprenoid biosynthesis, mevalonate pathway, archaea	map00071	Fatty acid degradation	Carbon fixation	Dicarboxylate-hydroxybutyrate cycle	E2.3.1.9, atoB; acetyl-CoA C-acetyltransferase [EC:2.3.1.9]	ACAT, atoB	acetyl-CoA C-acetyltransferase [EC:2.3.1.9]	ec:2.3.1.9	K00626	---	---	4	11	9	5	5	3	5	5	8	2	5	9	6	7	9	3	4	12	2	7	7	7	5	5	3	3	5	2	4	5	8	4	11	9	9
	787	M00849	C5 isoprenoid biosynthesis, mevalonate pathway, archaea	map00072	Synthesis and degradation of ketone bodies	Carbon fixation	Hydroxypropionate-hydroxybutylate cycle	E2.3.1.9, atoB; acetyl-CoA C-acetyltransferase [EC:2.3.1.9]	ACAT, atoB	acetyl-CoA C-acetyltransferase [EC:2.3.1.9]	ec:2.3.1.9	K00626	---	---	4	11	9	5	5	3	5	5	8	2	5	9	6	7	9	3	4	12	2	7	7	7	5	5	3	3	5	2	4	5	8	4	11	9	9
	788	M00849	C5 isoprenoid biosynthesis, mevalonate pathway, archaea	map00072	Synthesis and degradation of ketone bodies	Carbon fixation	Dicarboxylate-hydroxybutyrate cycle	E2.3.1.9, atoB; acetyl-CoA C-acetyltransferase [EC:2.3.1.9]	ACAT, atoB	acetyl-CoA C-acetyltransferase [EC:2.3.1.9]	ec:2.3.1.9	K00626	---	---	4	11	9	5	5	3	5	5	8	2	5	9	6	7	9	3	4	12	2	7	7	7	5	5	3	3	5	2	4	5	8	4	11	9	9
	789	M00849	C5 isoprenoid biosynthesis, mevalonate pathway, archaea	map00280	Valine, leucine and isoleucine degradation	Carbon fixation	Hydroxypropionate-hydroxybutylate cycle	E2.3.1.9, atoB; acetyl-CoA C-acetyltransferase [EC:2.3.1.9]	ACAT, atoB	acetyl-CoA C-acetyltransferase [EC:2.3.1.9]	ec:2.3.1.9	K00626	---	---	4	11	9	5	5	3	5	5	8	2	5	9	6	7	9	3	4	12	2	7	7	7	5	5	3	3	5	2	4	5	8	4	11	9	9
	790	M00849	C5 isoprenoid biosynthesis, mevalonate pathway, archaea	map00280	Valine, leucine and isoleucine degradation	Carbon fixation	Dicarboxylate-hydroxybutyrate cycle	E2.3.1.9, atoB; acetyl-CoA C-acetyltransferase [EC:2.3.1.9]	ACAT, atoB	acetyl-CoA C-acetyltransferase [EC:2.3.1.9]	ec:2.3.1.9	K00626	---	---	4	11	9	5	5	3	5	5	8	2	5	9	6	7	9	3	4	12	2	7	7	7	5	5	3	3	5	2	4	5	8	4	11	9	9
	791	M00849	C5 isoprenoid biosynthesis, mevalonate pathway, archaea	map00310	Lysine degradation	Carbon fixation	Hydroxypropionate-hydroxybutylate cycle	E2.3.1.9, atoB; acetyl-CoA C-acetyltransferase [EC:2.3.1.9]	ACAT, atoB	acetyl-CoA C-acetyltransferase [EC:2.3.1.9]	ec:2.3.1.9	K00626	---	---	4	11	9	5	5	3	5	5	8	2	5	9	6	7	9	3	4	12	2	7	7	7	5	5	3	3	5	2	4	5	8	4	11	9	9
	792	M00849	C5 isoprenoid biosynthesis, mevalonate pathway, archaea	map00310	Lysine degradation	Carbon fixation	Dicarboxylate-hydroxybutyrate cycle	E2.3.1.9, atoB; acetyl-CoA C-acetyltransferase [EC:2.3.1.9]	ACAT, atoB	acetyl-CoA C-acetyltransferase [EC:2.3.1.9]	ec:2.3.1.9	K00626	---	---	4	11	9	5	5	3	5	5	8	2	5	9	6	7	9	3	4	12	2	7	7	7	5	5	3	3	5	2	4	5	8	4	11	9	9
	793	M00849	C5 isoprenoid biosynthesis, mevalonate pathway, archaea	map00362	Benzoate degradation	Carbon fixation	Hydroxypropionate-hydroxybutylate cycle	E2.3.1.9, atoB; acetyl-CoA C-acetyltransferase [EC:2.3.1.9]	ACAT, atoB	acetyl-CoA C-acetyltransferase [EC:2.3.1.9]	ec:2.3.1.9	K00626	---	---	4	11	9	5	5	3	5	5	8	2	5	9	6	7	9	3	4	12	2	7	7	7	5	5	3	3	5	2	4	5	8	4	11	9	9
	794	M00849	C5 isoprenoid biosynthesis, mevalonate pathway, archaea	map00362	Benzoate degradation	Carbon fixation	Dicarboxylate-hydroxybutyrate cycle	E2.3.1.9, atoB; acetyl-CoA C-acetyltransferase [EC:2.3.1.9]	ACAT, atoB	acetyl-CoA C-acetyltransferase [EC:2.3.1.9]	ec:2.3.1.9	K00626	---	---	4	11	9	5	5	3	5	5	8	2	5	9	6	7	9	3	4	12	2	7	7	7	5	5	3	3	5	2	4	5	8	4	11	9	9
	795	M00849	C5 isoprenoid biosynthesis, mevalonate pathway, archaea	map00380	Tryptophan metabolism	Carbon fixation	Hydroxypropionate-hydroxybutylate cycle	E2.3.1.9, atoB; acetyl-CoA C-acetyltransferase [EC:2.3.1.9]	ACAT, atoB	acetyl-CoA C-acetyltransferase [EC:2.3.1.9]	ec:2.3.1.9	K00626	---	---	4	11	9	5	5	3	5	5	8	2	5	9	6	7	9	3	4	12	2	7	7	7	5	5	3	3	5	2	4	5	8	4	11	9	9
	796	M00849	C5 isoprenoid biosynthesis, mevalonate pathway, archaea	map00380	Tryptophan metabolism	Carbon fixation	Dicarboxylate-hydroxybutyrate cycle	E2.3.1.9, atoB; acetyl-CoA C-acetyltransferase [EC:2.3.1.9]	ACAT, atoB	acetyl-CoA C-acetyltransferase [EC:2.3.1.9]	ec:2.3.1.9	K00626	---	---	4	11	9	5	5	3	5	5	8	2	5	9	6	7	9	3	4	12	2	7	7	7	5	5	3	3	5	2	4	5	8	4	11	9	9
	797	M00849	C5 isoprenoid biosynthesis, mevalonate pathway, archaea	map00620	Pyruvate metabolism	Carbon fixation	Hydroxypropionate-hydroxybutylate cycle	E2.3.1.9, atoB; acetyl-CoA C-acetyltransferase [EC:2.3.1.9]	ACAT, atoB	acetyl-CoA C-acetyltransferase [EC:2.3.1.9]	ec:2.3.1.9	K00626	---	---	4	11	9	5	5	3	5	5	8	2	5	9	6	7	9	3	4	12	2	7	7	7	5	5	3	3	5	2	4	5	8	4	11	9	9
	798	M00849	C5 isoprenoid biosynthesis, mevalonate pathway, archaea	map00620	Pyruvate metabolism	Carbon fixation	Dicarboxylate-hydroxybutyrate cycle	E2.3.1.9, atoB; acetyl-CoA C-acetyltransferase [EC:2.3.1.9]	ACAT, atoB	acetyl-CoA C-acetyltransferase [EC:2.3.1.9]	ec:2.3.1.9	K00626	---	---	4	11	9	5	5	3	5	5	8	2	5	9	6	7	9	3	4	12	2	7	7	7	5	5	3	3	5	2	4	5	8	4	11	9	9
	799	M00849	C5 isoprenoid biosynthesis, mevalonate pathway, archaea	map00630	Glyoxylate and dicarboxylate metabolism	Carbon fixation	Hydroxypropionate-hydroxybutylate cycle	E2.3.1.9, atoB; acetyl-CoA C-acetyltransferase [EC:2.3.1.9]	ACAT, atoB	acetyl-CoA C-acetyltransferase [EC:2.3.1.9]	ec:2.3.1.9	K00626	---	---	4	11	9	5	5	3	5	5	8	2	5	9	6	7	9	3	4	12	2	7	7	7	5	5	3	3	5	2	4	5	8	4	11	9	9
	800	M00849	C5 isoprenoid biosynthesis, mevalonate pathway, archaea	map00630	Glyoxylate and dicarboxylate metabolism	Carbon fixation	Dicarboxylate-hydroxybutyrate cycle	E2.3.1.9, atoB; acetyl-CoA C-acetyltransferase [EC:2.3.1.9]	ACAT, atoB	acetyl-CoA C-acetyltransferase [EC:2.3.1.9]	ec:2.3.1.9	K00626	---	---	4	11	9	5	5	3	5	5	8	2	5	9	6	7	9	3	4	12	2	7	7	7	5	5	3	3	5	2	4	5	8	4	11	9	9
	801	M00849	C5 isoprenoid biosynthesis, mevalonate pathway, archaea	map00640	Propanoate metabolism	Carbon fixation	Hydroxypropionate-hydroxybutylate cycle	E2.3.1.9, atoB; acetyl-CoA C-acetyltransferase [EC:2.3.1.9]	ACAT, atoB	acetyl-CoA C-acetyltransferase [EC:2.3.1.9]	ec:2.3.1.9	K00626	---	---	4	11	9	5	5	3	5	5	8	2	5	9	6	7	9	3	4	12	2	7	7	7	5	5	3	3	5	2	4	5	8	4	11	9	9
	802	M00849	C5 isoprenoid biosynthesis, mevalonate pathway, archaea	map00640	Propanoate metabolism	Carbon fixation	Dicarboxylate-hydroxybutyrate cycle	E2.3.1.9, atoB; acetyl-CoA C-acetyltransferase [EC:2.3.1.9]	ACAT, atoB	acetyl-CoA C-acetyltransferase [EC:2.3.1.9]	ec:2.3.1.9	K00626	---	---	4	11	9	5	5	3	5	5	8	2	5	9	6	7	9	3	4	12	2	7	7	7	5	5	3	3	5	2	4	5	8	4	11	9	9
	803	M00849	C5 isoprenoid biosynthesis, mevalonate pathway, archaea	map00650	Butanoate metabolism	Carbon fixation	Hydroxypropionate-hydroxybutylate cycle	E2.3.1.9, atoB; acetyl-CoA C-acetyltransferase [EC:2.3.1.9]	ACAT, atoB	acetyl-CoA C-acetyltransferase [EC:2.3.1.9]	ec:2.3.1.9	K00626	---	---	4	11	9	5	5	3	5	5	8	2	5	9	6	7	9	3	4	12	2	7	7	7	5	5	3	3	5	2	4	5	8	4	11	9	9
	804	M00849	C5 isoprenoid biosynthesis, mevalonate pathway, archaea	map00650	Butanoate metabolism	Carbon fixation	Dicarboxylate-hydroxybutyrate cycle	E2.3.1.9, atoB; acetyl-CoA C-acetyltransferase [EC:2.3.1.9]	ACAT, atoB	acetyl-CoA C-acetyltransferase [EC:2.3.1.9]	ec:2.3.1.9	K00626	---	---	4	11	9	5	5	3	5	5	8	2	5	9	6	7	9	3	4	12	2	7	7	7	5	5	3	3	5	2	4	5	8	4	11	9	9
	805	M00849	C5 isoprenoid biosynthesis, mevalonate pathway, archaea	map00720	Carbon fixation pathways in prokaryotes	Carbon fixation	Hydroxypropionate-hydroxybutylate cycle	E2.3.1.9, atoB; acetyl-CoA C-acetyltransferase [EC:2.3.1.9]	ACAT, atoB	acetyl-CoA C-acetyltransferase [EC:2.3.1.9]	ec:2.3.1.9	K00626	---	---	4	11	9	5	5	3	5	5	8	2	5	9	6	7	9	3	4	12	2	7	7	7	5	5	3	3	5	2	4	5	8	4	11	9	9
	806	M00849	C5 isoprenoid biosynthesis, mevalonate pathway, archaea	map00720	Carbon fixation pathways in prokaryotes	Carbon fixation	Dicarboxylate-hydroxybutyrate cycle	E2.3.1.9, atoB; acetyl-CoA C-acetyltransferase [EC:2.3.1.9]	ACAT, atoB	acetyl-CoA C-acetyltransferase [EC:2.3.1.9]	ec:2.3.1.9	K00626	---	---	4	11	9	5	5	3	5	5	8	2	5	9	6	7	9	3	4	12	2	7	7	7	5	5	3	3	5	2	4	5	8	4	11	9	9
	807	M00849	C5 isoprenoid biosynthesis, mevalonate pathway, archaea	map00900	Terpenoid backbone biosynthesis	Carbon fixation	Hydroxypropionate-hydroxybutylate cycle	E2.3.1.9, atoB; acetyl-CoA C-acetyltransferase [EC:2.3.1.9]	ACAT, atoB	acetyl-CoA C-acetyltransferase [EC:2.3.1.9]	ec:2.3.1.9	K00626	---	---	4	11	9	5	5	3	5	5	8	2	5	9	6	7	9	3	4	12	2	7	7	7	5	5	3	3	5	2	4	5	8	4	11	9	9
	808	M00849	C5 isoprenoid biosynthesis, mevalonate pathway, archaea	map00900	Terpenoid backbone biosynthesis	Carbon fixation	Dicarboxylate-hydroxybutyrate cycle	E2.3.1.9, atoB; acetyl-CoA C-acetyltransferase [EC:2.3.1.9]	ACAT, atoB	acetyl-CoA C-acetyltransferase [EC:2.3.1.9]	ec:2.3.1.9	K00626	---	---	4	11	9	5	5	3	5	5	8	2	5	9	6	7	9	3	4	12	2	7	7	7	5	5	3	3	5	2	4	5	8	4	11	9	9
	809	M00849	C5 isoprenoid biosynthesis, mevalonate pathway, archaea	map01100	Metabolic pathways	Carbon fixation	Hydroxypropionate-hydroxybutylate cycle	E2.3.1.9, atoB; acetyl-CoA C-acetyltransferase [EC:2.3.1.9]	ACAT, atoB	acetyl-CoA C-acetyltransferase [EC:2.3.1.9]	ec:2.3.1.9	K00626	---	---	4	11	9	5	5	3	5	5	8	2	5	9	6	7	9	3	4	12	2	7	7	7	5	5	3	3	5	2	4	5	8	4	11	9	9
	810	M00849	C5 isoprenoid biosynthesis, mevalonate pathway, archaea	map01100	Metabolic pathways	Carbon fixation	Dicarboxylate-hydroxybutyrate cycle	E2.3.1.9, atoB; acetyl-CoA C-acetyltransferase [EC:2.3.1.9]	ACAT, atoB	acetyl-CoA C-acetyltransferase [EC:2.3.1.9]	ec:2.3.1.9	K00626	---	---	4	11	9	5	5	3	5	5	8	2	5	9	6	7	9	3	4	12	2	7	7	7	5	5	3	3	5	2	4	5	8	4	11	9	9
	811	M00849	C5 isoprenoid biosynthesis, mevalonate pathway, archaea	map01110	Biosynthesis of secondary metabolites	Carbon fixation	Hydroxypropionate-hydroxybutylate cycle	E2.3.1.9, atoB; acetyl-CoA C-acetyltransferase [EC:2.3.1.9]	ACAT, atoB	acetyl-CoA C-acetyltransferase [EC:2.3.1.9]	ec:2.3.1.9	K00626	---	---	4	11	9	5	5	3	5	5	8	2	5	9	6	7	9	3	4	12	2	7	7	7	5	5	3	3	5	2	4	5	8	4	11	9	9
	812	M00849	C5 isoprenoid biosynthesis, mevalonate pathway, archaea	map01110	Biosynthesis of secondary metabolites	Carbon fixation	Dicarboxylate-hydroxybutyrate cycle	E2.3.1.9, atoB; acetyl-CoA C-acetyltransferase [EC:2.3.1.9]	ACAT, atoB	acetyl-CoA C-acetyltransferase [EC:2.3.1.9]	ec:2.3.1.9	K00626	---	---	4	11	9	5	5	3	5	5	8	2	5	9	6	7	9	3	4	12	2	7	7	7	5	5	3	3	5	2	4	5	8	4	11	9	9
	813	M00849	C5 isoprenoid biosynthesis, mevalonate pathway, archaea	map01120	Microbial metabolism in diverse environments	Carbon fixation	Hydroxypropionate-hydroxybutylate cycle	E2.3.1.9, atoB; acetyl-CoA C-acetyltransferase [EC:2.3.1.9]	ACAT, atoB	acetyl-CoA C-acetyltransferase [EC:2.3.1.9]	ec:2.3.1.9	K00626	---	---	4	11	9	5	5	3	5	5	8	2	5	9	6	7	9	3	4	12	2	7	7	7	5	5	3	3	5	2	4	5	8	4	11	9	9
	814	M00849	C5 isoprenoid biosynthesis, mevalonate pathway, archaea	map01120	Microbial metabolism in diverse environments	Carbon fixation	Dicarboxylate-hydroxybutyrate cycle	E2.3.1.9, atoB; acetyl-CoA C-acetyltransferase [EC:2.3.1.9]	ACAT, atoB	acetyl-CoA C-acetyltransferase [EC:2.3.1.9]	ec:2.3.1.9	K00626	---	---	4	11	9	5	5	3	5	5	8	2	5	9	6	7	9	3	4	12	2	7	7	7	5	5	3	3	5	2	4	5	8	4	11	9	9
	815	M00849	C5 isoprenoid biosynthesis, mevalonate pathway, archaea	map01200	Carbon metabolism	Carbon fixation	Hydroxypropionate-hydroxybutylate cycle	E2.3.1.9, atoB; acetyl-CoA C-acetyltransferase [EC:2.3.1.9]	ACAT, atoB	acetyl-CoA C-acetyltransferase [EC:2.3.1.9]	ec:2.3.1.9	K00626	---	---	4	11	9	5	5	3	5	5	8	2	5	9	6	7	9	3	4	12	2	7	7	7	5	5	3	3	5	2	4	5	8	4	11	9	9
	816	M00849	C5 isoprenoid biosynthesis, mevalonate pathway, archaea	map01200	Carbon metabolism	Carbon fixation	Dicarboxylate-hydroxybutyrate cycle	E2.3.1.9, atoB; acetyl-CoA C-acetyltransferase [EC:2.3.1.9]	ACAT, atoB	acetyl-CoA C-acetyltransferase [EC:2.3.1.9]	ec:2.3.1.9	K00626	---	---	4	11	9	5	5	3	5	5	8	2	5	9	6	7	9	3	4	12	2	7	7	7	5	5	3	3	5	2	4	5	8	4	11	9	9
	817	M00849	C5 isoprenoid biosynthesis, mevalonate pathway, archaea	map01212	Fatty acid metabolism	Carbon fixation	Hydroxypropionate-hydroxybutylate cycle	E2.3.1.9, atoB; acetyl-CoA C-acetyltransferase [EC:2.3.1.9]	ACAT, atoB	acetyl-CoA C-acetyltransferase [EC:2.3.1.9]	ec:2.3.1.9	K00626	---	---	4	11	9	5	5	3	5	5	8	2	5	9	6	7	9	3	4	12	2	7	7	7	5	5	3	3	5	2	4	5	8	4	11	9	9
	818	M00849	C5 isoprenoid biosynthesis, mevalonate pathway, archaea	map01212	Fatty acid metabolism	Carbon fixation	Dicarboxylate-hydroxybutyrate cycle	E2.3.1.9, atoB; acetyl-CoA C-acetyltransferase [EC:2.3.1.9]	ACAT, atoB	acetyl-CoA C-acetyltransferase [EC:2.3.1.9]	ec:2.3.1.9	K00626	---	---	4	11	9	5	5	3	5	5	8	2	5	9	6	7	9	3	4	12	2	7	7	7	5	5	3	3	5	2	4	5	8	4	11	9	9
	819	M00849	C5 isoprenoid biosynthesis, mevalonate pathway, archaea	map02020	Two-component system	Carbon fixation	Hydroxypropionate-hydroxybutylate cycle	E2.3.1.9, atoB; acetyl-CoA C-acetyltransferase [EC:2.3.1.9]	ACAT, atoB	acetyl-CoA C-acetyltransferase [EC:2.3.1.9]	ec:2.3.1.9	K00626	---	---	4	11	9	5	5	3	5	5	8	2	5	9	6	7	9	3	4	12	2	7	7	7	5	5	3	3	5	2	4	5	8	4	11	9	9
	820	M00849	C5 isoprenoid biosynthesis, mevalonate pathway, archaea	map02020	Two-component system	Carbon fixation	Dicarboxylate-hydroxybutyrate cycle	E2.3.1.9, atoB; acetyl-CoA C-acetyltransferase [EC:2.3.1.9]	ACAT, atoB	acetyl-CoA C-acetyltransferase [EC:2.3.1.9]	ec:2.3.1.9	K00626	---	---	4	11	9	5	5	3	5	5	8	2	5	9	6	7	9	3	4	12	2	7	7	7	5	5	3	3	5	2	4	5	8	4	11	9	9
	821	M00849	C5 isoprenoid biosynthesis, mevalonate pathway, archaea	map04975	Fat digestion and absorption	Carbon fixation	Hydroxypropionate-hydroxybutylate cycle	E2.3.1.9, atoB; acetyl-CoA C-acetyltransferase [EC:2.3.1.9]	ACAT, atoB	acetyl-CoA C-acetyltransferase [EC:2.3.1.9]	ec:2.3.1.9	K00626	---	---	4	11	9	5	5	3	5	5	8	2	5	9	6	7	9	3	4	12	2	7	7	7	5	5	3	3	5	2	4	5	8	4	11	9	9
	822	M00849	C5 isoprenoid biosynthesis, mevalonate pathway, archaea	map04975	Fat digestion and absorption	Carbon fixation	Dicarboxylate-hydroxybutyrate cycle	E2.3.1.9, atoB; acetyl-CoA C-acetyltransferase [EC:2.3.1.9]	ACAT, atoB	acetyl-CoA C-acetyltransferase [EC:2.3.1.9]	ec:2.3.1.9	K00626	---	---	4	11	9	5	5	3	5	5	8	2	5	9	6	7	9	3	4	12	2	7	7	7	5	5	3	3	5	2	4	5	8	4	11	9	9
	823	M00849	C5 isoprenoid biosynthesis, mevalonate pathway, archaea	map00900	Terpenoid backbone biosynthesis	---	---	---	idi, IDI	isopentenyl-diphosphate Delta-isomerase [EC:5.3.3.2]	ec:5.3.3.2	K01823	---	---	1	0	0	0	0	0	0	2	0	1	0	0	0	1	2	0	1	0	1	0	1	1	0	0	1	1	0	2	0	0	0	0	0	1	1
	824	M00849	C5 isoprenoid biosynthesis, mevalonate pathway, archaea	map01100	Metabolic pathways	---	---	---	idi, IDI	isopentenyl-diphosphate Delta-isomerase [EC:5.3.3.2]	ec:5.3.3.2	K01823	---	---	1	0	0	0	0	0	0	2	0	1	0	0	0	1	2	0	1	0	1	0	1	1	0	0	1	1	0	2	0	0	0	0	0	1	1
	825	M00849	C5 isoprenoid biosynthesis, mevalonate pathway, archaea	map01110	Biosynthesis of secondary metabolites	---	---	---	idi, IDI	isopentenyl-diphosphate Delta-isomerase [EC:5.3.3.2]	ec:5.3.3.2	K01823	---	---	1	0	0	0	0	0	0	2	0	1	0	0	0	1	2	0	1	0	1	0	1	1	0	0	1	1	0	2	0	0	0	0	0	1	1
	826	M00849	C5 isoprenoid biosynthesis, mevalonate pathway, archaea	map00900	Terpenoid backbone biosynthesis	---	---	---	mvaA	hydroxymethylglutaryl-CoA reductase [EC:1.1.1.88]	ec:1.1.1.88	K00054	---	---	0	0	0	1	0	0	0	0	0	1	0	0	0	1	0	0	0	0	1	0	0	1	0	1	0	1	0	1	0	0	0	0	0	1	1
	827	M00849	C5 isoprenoid biosynthesis, mevalonate pathway, archaea	map01110	Biosynthesis of secondary metabolites	---	---	---	mvaA	hydroxymethylglutaryl-CoA reductase [EC:1.1.1.88]	ec:1.1.1.88	K00054	---	---	0	0	0	1	0	0	0	0	0	1	0	0	0	1	0	0	0	0	1	0	0	1	0	1	0	1	0	1	0	0	0	0	0	1	1
	828	M00849	C5 isoprenoid biosynthesis, mevalonate pathway, archaea	map00900	Terpenoid backbone biosynthesis	---	---	---	HMGCR	hydroxymethylglutaryl-CoA reductase (NADPH) [EC:1.1.1.34]	ec:1.1.1.34	K00021	---	---	0	0	0	0	0	0	0	0	0	0	0	0	0	0	0	1	0	0	0	0	0	0	0	0	0	0	0	0	1	0	0	2	0	0	0
	829	M00849	C5 isoprenoid biosynthesis, mevalonate pathway, archaea	map01100	Metabolic pathways	---	---	---	HMGCR	hydroxymethylglutaryl-CoA reductase (NADPH) [EC:1.1.1.34]	ec:1.1.1.34	K00021	---	---	0	0	0	0	0	0	0	0	0	0	0	0	0	0	0	1	0	0	0	0	0	0	0	0	0	0	0	0	1	0	0	2	0	0	0
	830	M00849	C5 isoprenoid biosynthesis, mevalonate pathway, archaea	map01110	Biosynthesis of secondary metabolites	---	---	---	HMGCR	hydroxymethylglutaryl-CoA reductase (NADPH) [EC:1.1.1.34]	ec:1.1.1.34	K00021	---	---	0	0	0	0	0	0	0	0	0	0	0	0	0	0	0	1	0	0	0	0	0	0	0	0	0	0	0	0	1	0	0	2	0	0	0
	831	M00849	C5 isoprenoid biosynthesis, mevalonate pathway, archaea	map04152	AMPK signaling pathway	---	---	---	HMGCR	hydroxymethylglutaryl-CoA reductase (NADPH) [EC:1.1.1.34]	ec:1.1.1.34	K00021	---	---	0	0	0	0	0	0	0	0	0	0	0	0	0	0	0	1	0	0	0	0	0	0	0	0	0	0	0	0	1	0	0	2	0	0	0
	832	M00849	C5 isoprenoid biosynthesis, mevalonate pathway, archaea	map04976	Bile secretion	---	---	---	HMGCR	hydroxymethylglutaryl-CoA reductase (NADPH) [EC:1.1.1.34]	ec:1.1.1.34	K00021	---	---	0	0	0	0	0	0	0	0	0	0	0	0	0	0	0	1	0	0	0	0	0	0	0	0	0	0	0	0	1	0	0	2	0	0	0
	833	M00849	C5 isoprenoid biosynthesis, mevalonate pathway, archaea	map00900	Terpenoid backbone biosynthesis	---	---	---	E2.7.1.36, MVK, mvaK1	mevalonate kinase [EC:2.7.1.36]	ec:2.7.1.36	K00869	---	---	0	0	0	0	0	0	0	0	0	0	0	0	0	0	0	0	0	0	0	0	0	0	0	0	0	1	0	0	0	0	0	0	0	0	0
	834	M00849	C5 isoprenoid biosynthesis, mevalonate pathway, archaea	map01100	Metabolic pathways	---	---	---	E2.7.1.36, MVK, mvaK1	mevalonate kinase [EC:2.7.1.36]	ec:2.7.1.36	K00869	---	---	0	0	0	0	0	0	0	0	0	0	0	0	0	0	0	0	0	0	0	0	0	0	0	0	0	1	0	0	0	0	0	0	0	0	0
	835	M00849	C5 isoprenoid biosynthesis, mevalonate pathway, archaea	map01110	Biosynthesis of secondary metabolites	---	---	---	E2.7.1.36, MVK, mvaK1	mevalonate kinase [EC:2.7.1.36]	ec:2.7.1.36	K00869	---	---	0	0	0	0	0	0	0	0	0	0	0	0	0	0	0	0	0	0	0	0	0	0	0	0	0	1	0	0	0	0	0	0	0	0	0
	836	M00849	C5 isoprenoid biosynthesis, mevalonate pathway, archaea	map04146	Peroxisome	---	---	---	E2.7.1.36, MVK, mvaK1	mevalonate kinase [EC:2.7.1.36]	ec:2.7.1.36	K00869	---	---	0	0	0	0	0	0	0	0	0	0	0	0	0	0	0	0	0	0	0	0	0	0	0	0	0	1	0	0	0	0	0	0	0	0	0
	837	M00848	Aurachin biosynthesis, anthranilate => aurachin A	map00998	Biosynthesis of various secondary metabolites - part 2	---	---	---	acpP	acyl carrier protein	---	K02078	---	---	2	1	1	2	1	1	1	1	1	3	3	0	0	3	2	0	2	1	3	1	2	3	1	2	2	2	2	1	1	2	1	2	1	2	2
	838	M00848	Aurachin biosynthesis, anthranilate => aurachin A	map01100	Metabolic pathways	---	---	---	acpP	acyl carrier protein	---	K02078	---	---	2	1	1	2	1	1	1	1	1	3	3	0	0	3	2	0	2	1	3	1	2	3	1	2	2	2	2	1	1	2	1	2	1	2	2
	839	M00848	Aurachin biosynthesis, anthranilate => aurachin A	map01110	Biosynthesis of secondary metabolites	---	---	---	acpP	acyl carrier protein	---	K02078	---	---	2	1	1	2	1	1	1	1	1	3	3	0	0	3	2	0	2	1	3	1	2	3	1	2	2	2	2	1	1	2	1	2	1	2	2
	840	M00846	Siroheme biosynthesis, glutamyl-tRNA => siroheme	map00860	Porphyrin and chlorophyll metabolism	---	---	---	hemC, HMBS	hydroxymethylbilane synthase [EC:2.5.1.61]	ec:2.5.1.61	K01749	---	---	1	1	1	1	1	1	1	1	1	1	1	1	1	1	2	1	1	1	1	1	1	1	2	1	1	1	1	1	1	1	1	1	1	1	1
	841	M00846	Siroheme biosynthesis, glutamyl-tRNA => siroheme	map01100	Metabolic pathways	---	---	---	hemC, HMBS	hydroxymethylbilane synthase [EC:2.5.1.61]	ec:2.5.1.61	K01749	---	---	1	1	1	1	1	1	1	1	1	1	1	1	1	1	2	1	1	1	1	1	1	1	2	1	1	1	1	1	1	1	1	1	1	1	1
	842	M00846	Siroheme biosynthesis, glutamyl-tRNA => siroheme	map01110	Biosynthesis of secondary metabolites	---	---	---	hemC, HMBS	hydroxymethylbilane synthase [EC:2.5.1.61]	ec:2.5.1.61	K01749	---	---	1	1	1	1	1	1	1	1	1	1	1	1	1	1	2	1	1	1	1	1	1	1	2	1	1	1	1	1	1	1	1	1	1	1	1
	843	M00846	Siroheme biosynthesis, glutamyl-tRNA => siroheme	map01120	Microbial metabolism in diverse environments	---	---	---	hemC, HMBS	hydroxymethylbilane synthase [EC:2.5.1.61]	ec:2.5.1.61	K01749	---	---	1	1	1	1	1	1	1	1	1	1	1	1	1	1	2	1	1	1	1	1	1	1	2	1	1	1	1	1	1	1	1	1	1	1	1
	844	M00846	Siroheme biosynthesis, glutamyl-tRNA => siroheme	map01240	Biosynthesis of cofactors	---	---	---	hemC, HMBS	hydroxymethylbilane synthase [EC:2.5.1.61]	ec:2.5.1.61	K01749	---	---	1	1	1	1	1	1	1	1	1	1	1	1	1	1	2	1	1	1	1	1	1	1	2	1	1	1	1	1	1	1	1	1	1	1	1
	845	M00846	Siroheme biosynthesis, glutamyl-tRNA => siroheme	map00860	Porphyrin and chlorophyll metabolism	---	---	---	hemD, UROS	uroporphyrinogen-III synthase [EC:4.2.1.75]	ec:4.2.1.75	K01719	---	---	1	1	1	1	1	1	1	1	1	2	1	1	1	1	1	1	1	1	2	1	1	1	2	1	0	2	1	2	1	1	1	1	1	1	1
	846	M00846	Siroheme biosynthesis, glutamyl-tRNA => siroheme	map01100	Metabolic pathways	---	---	---	hemD, UROS	uroporphyrinogen-III synthase [EC:4.2.1.75]	ec:4.2.1.75	K01719	---	---	1	1	1	1	1	1	1	1	1	2	1	1	1	1	1	1	1	1	2	1	1	1	2	1	0	2	1	2	1	1	1	1	1	1	1
	847	M00846	Siroheme biosynthesis, glutamyl-tRNA => siroheme	map01110	Biosynthesis of secondary metabolites	---	---	---	hemD, UROS	uroporphyrinogen-III synthase [EC:4.2.1.75]	ec:4.2.1.75	K01719	---	---	1	1	1	1	1	1	1	1	1	2	1	1	1	1	1	1	1	1	2	1	1	1	2	1	0	2	1	2	1	1	1	1	1	1	1
	848	M00846	Siroheme biosynthesis, glutamyl-tRNA => siroheme	map01120	Microbial metabolism in diverse environments	---	---	---	hemD, UROS	uroporphyrinogen-III synthase [EC:4.2.1.75]	ec:4.2.1.75	K01719	---	---	1	1	1	1	1	1	1	1	1	2	1	1	1	1	1	1	1	1	2	1	1	1	2	1	0	2	1	2	1	1	1	1	1	1	1
	849	M00846	Siroheme biosynthesis, glutamyl-tRNA => siroheme	map01240	Biosynthesis of cofactors	---	---	---	hemD, UROS	uroporphyrinogen-III synthase [EC:4.2.1.75]	ec:4.2.1.75	K01719	---	---	1	1	1	1	1	1	1	1	1	2	1	1	1	1	1	1	1	1	2	1	1	1	2	1	0	2	1	2	1	1	1	1	1	1	1
	850	M00846	Siroheme biosynthesis, glutamyl-tRNA => siroheme	map00860	Porphyrin and chlorophyll metabolism	---	---	---	cysG	uroporphyrin-III C-methyltransferase / precorrin-2 dehydrogenase / sirohydrochlorin ferrochelatase [EC:2.1.1.107 1.3.1.76 4.99.1.4]	ec:2.1.1.107	K02302	---	---	1	0	1	1	1	0	1	0	1	0	1	1	1	0	2	0	1	0	0	1	2	0	1	1	0	0	1	0	1	0	1	1	0	0	0
	851	M00846	Siroheme biosynthesis, glutamyl-tRNA => siroheme	map00860	Porphyrin and chlorophyll metabolism	---	---	---	cysG	uroporphyrin-III C-methyltransferase / precorrin-2 dehydrogenase / sirohydrochlorin ferrochelatase [EC:2.1.1.107 1.3.1.76 4.99.1.4]	ec:1.3.1.76	K02302	---	---	1	0	1	1	1	0	1	0	1	0	1	1	1	0	2	0	1	0	0	1	2	0	1	1	0	0	1	0	1	0	1	1	0	0	0
	852	M00846	Siroheme biosynthesis, glutamyl-tRNA => siroheme	map00860	Porphyrin and chlorophyll metabolism	---	---	---	cysG	uroporphyrin-III C-methyltransferase / precorrin-2 dehydrogenase / sirohydrochlorin ferrochelatase [EC:2.1.1.107 1.3.1.76 4.99.1.4]	ec:4.99.1.4	K02302	---	---	1	0	1	1	1	0	1	0	1	0	1	1	1	0	2	0	1	0	0	1	2	0	1	1	0	0	1	0	1	0	1	1	0	0	0
	853	M00846	Siroheme biosynthesis, glutamyl-tRNA => siroheme	map01100	Metabolic pathways	---	---	---	cysG	uroporphyrin-III C-methyltransferase / precorrin-2 dehydrogenase / sirohydrochlorin ferrochelatase [EC:2.1.1.107 1.3.1.76 4.99.1.4]	ec:2.1.1.107	K02302	---	---	1	0	1	1	1	0	1	0	1	0	1	1	1	0	2	0	1	0	0	1	2	0	1	1	0	0	1	0	1	0	1	1	0	0	0
	854	M00846	Siroheme biosynthesis, glutamyl-tRNA => siroheme	map01100	Metabolic pathways	---	---	---	cysG	uroporphyrin-III C-methyltransferase / precorrin-2 dehydrogenase / sirohydrochlorin ferrochelatase [EC:2.1.1.107 1.3.1.76 4.99.1.4]	ec:1.3.1.76	K02302	---	---	1	0	1	1	1	0	1	0	1	0	1	1	1	0	2	0	1	0	0	1	2	0	1	1	0	0	1	0	1	0	1	1	0	0	0
	855	M00846	Siroheme biosynthesis, glutamyl-tRNA => siroheme	map01100	Metabolic pathways	---	---	---	cysG	uroporphyrin-III C-methyltransferase / precorrin-2 dehydrogenase / sirohydrochlorin ferrochelatase [EC:2.1.1.107 1.3.1.76 4.99.1.4]	ec:4.99.1.4	K02302	---	---	1	0	1	1	1	0	1	0	1	0	1	1	1	0	2	0	1	0	0	1	2	0	1	1	0	0	1	0	1	0	1	1	0	0	0
	856	M00846	Siroheme biosynthesis, glutamyl-tRNA => siroheme	map01110	Biosynthesis of secondary metabolites	---	---	---	cysG	uroporphyrin-III C-methyltransferase / precorrin-2 dehydrogenase / sirohydrochlorin ferrochelatase [EC:2.1.1.107 1.3.1.76 4.99.1.4]	ec:2.1.1.107	K02302	---	---	1	0	1	1	1	0	1	0	1	0	1	1	1	0	2	0	1	0	0	1	2	0	1	1	0	0	1	0	1	0	1	1	0	0	0
	857	M00846	Siroheme biosynthesis, glutamyl-tRNA => siroheme	map01110	Biosynthesis of secondary metabolites	---	---	---	cysG	uroporphyrin-III C-methyltransferase / precorrin-2 dehydrogenase / sirohydrochlorin ferrochelatase [EC:2.1.1.107 1.3.1.76 4.99.1.4]	ec:1.3.1.76	K02302	---	---	1	0	1	1	1	0	1	0	1	0	1	1	1	0	2	0	1	0	0	1	2	0	1	1	0	0	1	0	1	0	1	1	0	0	0
	858	M00846	Siroheme biosynthesis, glutamyl-tRNA => siroheme	map01110	Biosynthesis of secondary metabolites	---	---	---	cysG	uroporphyrin-III C-methyltransferase / precorrin-2 dehydrogenase / sirohydrochlorin ferrochelatase [EC:2.1.1.107 1.3.1.76 4.99.1.4]	ec:4.99.1.4	K02302	---	---	1	0	1	1	1	0	1	0	1	0	1	1	1	0	2	0	1	0	0	1	2	0	1	1	0	0	1	0	1	0	1	1	0	0	0
	859	M00846	Siroheme biosynthesis, glutamyl-tRNA => siroheme	map01120	Microbial metabolism in diverse environments	---	---	---	cysG	uroporphyrin-III C-methyltransferase / precorrin-2 dehydrogenase / sirohydrochlorin ferrochelatase [EC:2.1.1.107 1.3.1.76 4.99.1.4]	ec:2.1.1.107	K02302	---	---	1	0	1	1	1	0	1	0	1	0	1	1	1	0	2	0	1	0	0	1	2	0	1	1	0	0	1	0	1	0	1	1	0	0	0
	860	M00846	Siroheme biosynthesis, glutamyl-tRNA => siroheme	map01120	Microbial metabolism in diverse environments	---	---	---	cysG	uroporphyrin-III C-methyltransferase / precorrin-2 dehydrogenase / sirohydrochlorin ferrochelatase [EC:2.1.1.107 1.3.1.76 4.99.1.4]	ec:1.3.1.76	K02302	---	---	1	0	1	1	1	0	1	0	1	0	1	1	1	0	2	0	1	0	0	1	2	0	1	1	0	0	1	0	1	0	1	1	0	0	0
	861	M00846	Siroheme biosynthesis, glutamyl-tRNA => siroheme	map01120	Microbial metabolism in diverse environments	---	---	---	cysG	uroporphyrin-III C-methyltransferase / precorrin-2 dehydrogenase / sirohydrochlorin ferrochelatase [EC:2.1.1.107 1.3.1.76 4.99.1.4]	ec:4.99.1.4	K02302	---	---	1	0	1	1	1	0	1	0	1	0	1	1	1	0	2	0	1	0	0	1	2	0	1	1	0	0	1	0	1	0	1	1	0	0	0
	862	M00846	Siroheme biosynthesis, glutamyl-tRNA => siroheme	map01240	Biosynthesis of cofactors	---	---	---	cysG	uroporphyrin-III C-methyltransferase / precorrin-2 dehydrogenase / sirohydrochlorin ferrochelatase [EC:2.1.1.107 1.3.1.76 4.99.1.4]	ec:2.1.1.107	K02302	---	---	1	0	1	1	1	0	1	0	1	0	1	1	1	0	2	0	1	0	0	1	2	0	1	1	0	0	1	0	1	0	1	1	0	0	0
	863	M00846	Siroheme biosynthesis, glutamyl-tRNA => siroheme	map01240	Biosynthesis of cofactors	---	---	---	cysG	uroporphyrin-III C-methyltransferase / precorrin-2 dehydrogenase / sirohydrochlorin ferrochelatase [EC:2.1.1.107 1.3.1.76 4.99.1.4]	ec:1.3.1.76	K02302	---	---	1	0	1	1	1	0	1	0	1	0	1	1	1	0	2	0	1	0	0	1	2	0	1	1	0	0	1	0	1	0	1	1	0	0	0
	864	M00846	Siroheme biosynthesis, glutamyl-tRNA => siroheme	map01240	Biosynthesis of cofactors	---	---	---	cysG	uroporphyrin-III C-methyltransferase / precorrin-2 dehydrogenase / sirohydrochlorin ferrochelatase [EC:2.1.1.107 1.3.1.76 4.99.1.4]	ec:4.99.1.4	K02302	---	---	1	0	1	1	1	0	1	0	1	0	1	1	1	0	2	0	1	0	0	1	2	0	1	1	0	0	1	0	1	0	1	1	0	0	0
	865	M00846	Siroheme biosynthesis, glutamyl-tRNA => siroheme	map00860	Porphyrin and chlorophyll metabolism	---	---	---	cobA	uroporphyrin-III C-methyltransferase [EC:2.1.1.107]	ec:2.1.1.107	K02303	---	---	1	1	1	1	1	1	2	0	1	0	1	2	1	3	3	1	1	1	0	1	3	3	2	1	0	0	2	0	2	1	1	2	1	2	2
	866	M00846	Siroheme biosynthesis, glutamyl-tRNA => siroheme	map01100	Metabolic pathways	---	---	---	cobA	uroporphyrin-III C-methyltransferase [EC:2.1.1.107]	ec:2.1.1.107	K02303	---	---	1	1	1	1	1	1	2	0	1	0	1	2	1	3	3	1	1	1	0	1	3	3	2	1	0	0	2	0	2	1	1	2	1	2	2
	867	M00846	Siroheme biosynthesis, glutamyl-tRNA => siroheme	map01110	Biosynthesis of secondary metabolites	---	---	---	cobA	uroporphyrin-III C-methyltransferase [EC:2.1.1.107]	ec:2.1.1.107	K02303	---	---	1	1	1	1	1	1	2	0	1	0	1	2	1	3	3	1	1	1	0	1	3	3	2	1	0	0	2	0	2	1	1	2	1	2	2
	868	M00846	Siroheme biosynthesis, glutamyl-tRNA => siroheme	map01120	Microbial metabolism in diverse environments	---	---	---	cobA	uroporphyrin-III C-methyltransferase [EC:2.1.1.107]	ec:2.1.1.107	K02303	---	---	1	1	1	1	1	1	2	0	1	0	1	2	1	3	3	1	1	1	0	1	3	3	2	1	0	0	2	0	2	1	1	2	1	2	2
	869	M00846	Siroheme biosynthesis, glutamyl-tRNA => siroheme	map01240	Biosynthesis of cofactors	---	---	---	cobA	uroporphyrin-III C-methyltransferase [EC:2.1.1.107]	ec:2.1.1.107	K02303	---	---	1	1	1	1	1	1	2	0	1	0	1	2	1	3	3	1	1	1	0	1	3	3	2	1	0	0	2	0	2	1	1	2	1	2	2
	870	M00846	Siroheme biosynthesis, glutamyl-tRNA => siroheme	map00860	Porphyrin and chlorophyll metabolism	---	---	---	MET8	precorrin-2 dehydrogenase / sirohydrochlorin ferrochelatase [EC:1.3.1.76 4.99.1.4]	ec:1.3.1.76	K02304	---	---	1	0	1	1	0	0	1	0	1	0	1	1	1	0	2	0	1	0	0	1	2	0	1	1	0	0	1	0	1	0	1	1	0	0	0
	871	M00846	Siroheme biosynthesis, glutamyl-tRNA => siroheme	map00860	Porphyrin and chlorophyll metabolism	---	---	---	MET8	precorrin-2 dehydrogenase / sirohydrochlorin ferrochelatase [EC:1.3.1.76 4.99.1.4]	ec:4.99.1.4	K02304	---	---	1	0	1	1	0	0	1	0	1	0	1	1	1	0	2	0	1	0	0	1	2	0	1	1	0	0	1	0	1	0	1	1	0	0	0
	872	M00846	Siroheme biosynthesis, glutamyl-tRNA => siroheme	map01100	Metabolic pathways	---	---	---	MET8	precorrin-2 dehydrogenase / sirohydrochlorin ferrochelatase [EC:1.3.1.76 4.99.1.4]	ec:1.3.1.76	K02304	---	---	1	0	1	1	0	0	1	0	1	0	1	1	1	0	2	0	1	0	0	1	2	0	1	1	0	0	1	0	1	0	1	1	0	0	0
	873	M00846	Siroheme biosynthesis, glutamyl-tRNA => siroheme	map01100	Metabolic pathways	---	---	---	MET8	precorrin-2 dehydrogenase / sirohydrochlorin ferrochelatase [EC:1.3.1.76 4.99.1.4]	ec:4.99.1.4	K02304	---	---	1	0	1	1	0	0	1	0	1	0	1	1	1	0	2	0	1	0	0	1	2	0	1	1	0	0	1	0	1	0	1	1	0	0	0
	874	M00846	Siroheme biosynthesis, glutamyl-tRNA => siroheme	map01110	Biosynthesis of secondary metabolites	---	---	---	MET8	precorrin-2 dehydrogenase / sirohydrochlorin ferrochelatase [EC:1.3.1.76 4.99.1.4]	ec:1.3.1.76	K02304	---	---	1	0	1	1	0	0	1	0	1	0	1	1	1	0	2	0	1	0	0	1	2	0	1	1	0	0	1	0	1	0	1	1	0	0	0
	875	M00846	Siroheme biosynthesis, glutamyl-tRNA => siroheme	map01110	Biosynthesis of secondary metabolites	---	---	---	MET8	precorrin-2 dehydrogenase / sirohydrochlorin ferrochelatase [EC:1.3.1.76 4.99.1.4]	ec:4.99.1.4	K02304	---	---	1	0	1	1	0	0	1	0	1	0	1	1	1	0	2	0	1	0	0	1	2	0	1	1	0	0	1	0	1	0	1	1	0	0	0
	876	M00846	Siroheme biosynthesis, glutamyl-tRNA => siroheme	map01120	Microbial metabolism in diverse environments	---	---	---	MET8	precorrin-2 dehydrogenase / sirohydrochlorin ferrochelatase [EC:1.3.1.76 4.99.1.4]	ec:1.3.1.76	K02304	---	---	1	0	1	1	0	0	1	0	1	0	1	1	1	0	2	0	1	0	0	1	2	0	1	1	0	0	1	0	1	0	1	1	0	0	0
	877	M00846	Siroheme biosynthesis, glutamyl-tRNA => siroheme	map01120	Microbial metabolism in diverse environments	---	---	---	MET8	precorrin-2 dehydrogenase / sirohydrochlorin ferrochelatase [EC:1.3.1.76 4.99.1.4]	ec:4.99.1.4	K02304	---	---	1	0	1	1	0	0	1	0	1	0	1	1	1	0	2	0	1	0	0	1	2	0	1	1	0	0	1	0	1	0	1	1	0	0	0
	878	M00846	Siroheme biosynthesis, glutamyl-tRNA => siroheme	map01240	Biosynthesis of cofactors	---	---	---	MET8	precorrin-2 dehydrogenase / sirohydrochlorin ferrochelatase [EC:1.3.1.76 4.99.1.4]	ec:1.3.1.76	K02304	---	---	1	0	1	1	0	0	1	0	1	0	1	1	1	0	2	0	1	0	0	1	2	0	1	1	0	0	1	0	1	0	1	1	0	0	0
	879	M00846	Siroheme biosynthesis, glutamyl-tRNA => siroheme	map01240	Biosynthesis of cofactors	---	---	---	MET8	precorrin-2 dehydrogenase / sirohydrochlorin ferrochelatase [EC:1.3.1.76 4.99.1.4]	ec:4.99.1.4	K02304	---	---	1	0	1	1	0	0	1	0	1	0	1	1	1	0	2	0	1	0	0	1	2	0	1	1	0	0	1	0	1	0	1	1	0	0	0
	880	M00846	Siroheme biosynthesis, glutamyl-tRNA => siroheme	map00860	Porphyrin and chlorophyll metabolism	---	---	---	hemB, ALAD	porphobilinogen synthase [EC:4.2.1.24]	ec:4.2.1.24	K01698	---	---	1	1	1	1	1	0	1	1	1	1	1	1	1	1	1	1	1	1	1	1	1	1	1	1	1	1	1	1	1	1	1	1	1	1	1
	881	M00846	Siroheme biosynthesis, glutamyl-tRNA => siroheme	map01100	Metabolic pathways	---	---	---	hemB, ALAD	porphobilinogen synthase [EC:4.2.1.24]	ec:4.2.1.24	K01698	---	---	1	1	1	1	1	0	1	1	1	1	1	1	1	1	1	1	1	1	1	1	1	1	1	1	1	1	1	1	1	1	1	1	1	1	1
	882	M00846	Siroheme biosynthesis, glutamyl-tRNA => siroheme	map01110	Biosynthesis of secondary metabolites	---	---	---	hemB, ALAD	porphobilinogen synthase [EC:4.2.1.24]	ec:4.2.1.24	K01698	---	---	1	1	1	1	1	0	1	1	1	1	1	1	1	1	1	1	1	1	1	1	1	1	1	1	1	1	1	1	1	1	1	1	1	1	1
	883	M00846	Siroheme biosynthesis, glutamyl-tRNA => siroheme	map01120	Microbial metabolism in diverse environments	---	---	---	hemB, ALAD	porphobilinogen synthase [EC:4.2.1.24]	ec:4.2.1.24	K01698	---	---	1	1	1	1	1	0	1	1	1	1	1	1	1	1	1	1	1	1	1	1	1	1	1	1	1	1	1	1	1	1	1	1	1	1	1
	884	M00846	Siroheme biosynthesis, glutamyl-tRNA => siroheme	map01240	Biosynthesis of cofactors	---	---	---	hemB, ALAD	porphobilinogen synthase [EC:4.2.1.24]	ec:4.2.1.24	K01698	---	---	1	1	1	1	1	0	1	1	1	1	1	1	1	1	1	1	1	1	1	1	1	1	1	1	1	1	1	1	1	1	1	1	1	1	1
	885	M00846	Siroheme biosynthesis, glutamyl-tRNA => siroheme	map00860	Porphyrin and chlorophyll metabolism	---	---	---	hemL	glutamate-1-semialdehyde 2,1-aminomutase [EC:5.4.3.8]	ec:5.4.3.8	K01845	---	---	0	1	1	0	0	1	1	0	1	1	1	0	0	0	0	1	0	1	1	1	0	0	1	0	0	1	1	1	1	0	1	1	1	0	0
	886	M00846	Siroheme biosynthesis, glutamyl-tRNA => siroheme	map01100	Metabolic pathways	---	---	---	hemL	glutamate-1-semialdehyde 2,1-aminomutase [EC:5.4.3.8]	ec:5.4.3.8	K01845	---	---	0	1	1	0	0	1	1	0	1	1	1	0	0	0	0	1	0	1	1	1	0	0	1	0	0	1	1	1	1	0	1	1	1	0	0
	887	M00846	Siroheme biosynthesis, glutamyl-tRNA => siroheme	map01110	Biosynthesis of secondary metabolites	---	---	---	hemL	glutamate-1-semialdehyde 2,1-aminomutase [EC:5.4.3.8]	ec:5.4.3.8	K01845	---	---	0	1	1	0	0	1	1	0	1	1	1	0	0	0	0	1	0	1	1	1	0	0	1	0	0	1	1	1	1	0	1	1	1	0	0
	888	M00846	Siroheme biosynthesis, glutamyl-tRNA => siroheme	map01120	Microbial metabolism in diverse environments	---	---	---	hemL	glutamate-1-semialdehyde 2,1-aminomutase [EC:5.4.3.8]	ec:5.4.3.8	K01845	---	---	0	1	1	0	0	1	1	0	1	1	1	0	0	0	0	1	0	1	1	1	0	0	1	0	0	1	1	1	1	0	1	1	1	0	0
	889	M00846	Siroheme biosynthesis, glutamyl-tRNA => siroheme	map01240	Biosynthesis of cofactors	---	---	---	hemL	glutamate-1-semialdehyde 2,1-aminomutase [EC:5.4.3.8]	ec:5.4.3.8	K01845	---	---	0	1	1	0	0	1	1	0	1	1	1	0	0	0	0	1	0	1	1	1	0	0	1	0	0	1	1	1	1	0	1	1	1	0	0
	890	M00846	Siroheme biosynthesis, glutamyl-tRNA => siroheme	map00860	Porphyrin and chlorophyll metabolism	---	---	---	hemX	uroporphyrin-III C-methyltransferase [EC:2.1.1.107]	ec:2.1.1.107	K02496	---	---	0	1	1	0	0	1	1	0	1	0	1	0	0	0	0	1	0	1	0	1	0	0	2	0	0	0	1	0	1	0	1	1	1	0	0
	891	M00846	Siroheme biosynthesis, glutamyl-tRNA => siroheme	map01100	Metabolic pathways	---	---	---	hemX	uroporphyrin-III C-methyltransferase [EC:2.1.1.107]	ec:2.1.1.107	K02496	---	---	0	1	1	0	0	1	1	0	1	0	1	0	0	0	0	1	0	1	0	1	0	0	2	0	0	0	1	0	1	0	1	1	1	0	0
	892	M00846	Siroheme biosynthesis, glutamyl-tRNA => siroheme	map01110	Biosynthesis of secondary metabolites	---	---	---	hemX	uroporphyrin-III C-methyltransferase [EC:2.1.1.107]	ec:2.1.1.107	K02496	---	---	0	1	1	0	0	1	1	0	1	0	1	0	0	0	0	1	0	1	0	1	0	0	2	0	0	0	1	0	1	0	1	1	1	0	0
	893	M00846	Siroheme biosynthesis, glutamyl-tRNA => siroheme	map01120	Microbial metabolism in diverse environments	---	---	---	hemX	uroporphyrin-III C-methyltransferase [EC:2.1.1.107]	ec:2.1.1.107	K02496	---	---	0	1	1	0	0	1	1	0	1	0	1	0	0	0	0	1	0	1	0	1	0	0	2	0	0	0	1	0	1	0	1	1	1	0	0
	894	M00846	Siroheme biosynthesis, glutamyl-tRNA => siroheme	map01240	Biosynthesis of cofactors	---	---	---	hemX	uroporphyrin-III C-methyltransferase [EC:2.1.1.107]	ec:2.1.1.107	K02496	---	---	0	1	1	0	0	1	1	0	1	0	1	0	0	0	0	1	0	1	0	1	0	0	2	0	0	0	1	0	1	0	1	1	1	0	0
	895	M00846	Siroheme biosynthesis, glutamyl-tRNA => siroheme	map00860	Porphyrin and chlorophyll metabolism	---	---	---	hemA	glutamyl-tRNA reductase [EC:1.2.1.70]	ec:1.2.1.70	K02492	---	---	0	1	1	0	0	1	1	0	1	1	1	0	0	0	0	0	0	1	1	1	0	0	1	0	0	1	1	1	1	0	1	2	1	0	0
	896	M00846	Siroheme biosynthesis, glutamyl-tRNA => siroheme	map01100	Metabolic pathways	---	---	---	hemA	glutamyl-tRNA reductase [EC:1.2.1.70]	ec:1.2.1.70	K02492	---	---	0	1	1	0	0	1	1	0	1	1	1	0	0	0	0	0	0	1	1	1	0	0	1	0	0	1	1	1	1	0	1	2	1	0	0
	897	M00846	Siroheme biosynthesis, glutamyl-tRNA => siroheme	map01110	Biosynthesis of secondary metabolites	---	---	---	hemA	glutamyl-tRNA reductase [EC:1.2.1.70]	ec:1.2.1.70	K02492	---	---	0	1	1	0	0	1	1	0	1	1	1	0	0	0	0	0	0	1	1	1	0	0	1	0	0	1	1	1	1	0	1	2	1	0	0
	898	M00846	Siroheme biosynthesis, glutamyl-tRNA => siroheme	map01120	Microbial metabolism in diverse environments	---	---	---	hemA	glutamyl-tRNA reductase [EC:1.2.1.70]	ec:1.2.1.70	K02492	---	---	0	1	1	0	0	1	1	0	1	1	1	0	0	0	0	0	0	1	1	1	0	0	1	0	0	1	1	1	1	0	1	2	1	0	0
	899	M00846	Siroheme biosynthesis, glutamyl-tRNA => siroheme	map01240	Biosynthesis of cofactors	---	---	---	hemA	glutamyl-tRNA reductase [EC:1.2.1.70]	ec:1.2.1.70	K02492	---	---	0	1	1	0	0	1	1	0	1	1	1	0	0	0	0	0	0	1	1	1	0	0	1	0	0	1	1	1	1	0	1	2	1	0	0
	900	M00845	Arginine biosynthesis, glutamate => acetylcitrulline => arginine	map00220	Arginine biosynthesis	---	---	---	argD	acetylornithine/N-succinyldiaminopimelate aminotransferase [EC:2.6.1.11 2.6.1.17]	ec:2.6.1.11	K00821	---	---	1	1	1	1	1	1	1	1	1	0	1	0	1	1	1	1	1	2	0	1	1	1	1	1	0	0	1	0	1	1	1	1	1	1	1
	901	M00845	Arginine biosynthesis, glutamate => acetylcitrulline => arginine	map00220	Arginine biosynthesis	---	---	---	argD	acetylornithine/N-succinyldiaminopimelate aminotransferase [EC:2.6.1.11 2.6.1.17]	ec:2.6.1.17	K00821	---	---	1	1	1	1	1	1	1	1	1	0	1	0	1	1	1	1	1	2	0	1	1	1	1	1	0	0	1	0	1	1	1	1	1	1	1
	902	M00845	Arginine biosynthesis, glutamate => acetylcitrulline => arginine	map00300	Lysine biosynthesis	---	---	---	argD	acetylornithine/N-succinyldiaminopimelate aminotransferase [EC:2.6.1.11 2.6.1.17]	ec:2.6.1.11	K00821	---	---	1	1	1	1	1	1	1	1	1	0	1	0	1	1	1	1	1	2	0	1	1	1	1	1	0	0	1	0	1	1	1	1	1	1	1
	903	M00845	Arginine biosynthesis, glutamate => acetylcitrulline => arginine	map00300	Lysine biosynthesis	---	---	---	argD	acetylornithine/N-succinyldiaminopimelate aminotransferase [EC:2.6.1.11 2.6.1.17]	ec:2.6.1.17	K00821	---	---	1	1	1	1	1	1	1	1	1	0	1	0	1	1	1	1	1	2	0	1	1	1	1	1	0	0	1	0	1	1	1	1	1	1	1
	904	M00845	Arginine biosynthesis, glutamate => acetylcitrulline => arginine	map01100	Metabolic pathways	---	---	---	argD	acetylornithine/N-succinyldiaminopimelate aminotransferase [EC:2.6.1.11 2.6.1.17]	ec:2.6.1.11	K00821	---	---	1	1	1	1	1	1	1	1	1	0	1	0	1	1	1	1	1	2	0	1	1	1	1	1	0	0	1	0	1	1	1	1	1	1	1
	905	M00845	Arginine biosynthesis, glutamate => acetylcitrulline => arginine	map01100	Metabolic pathways	---	---	---	argD	acetylornithine/N-succinyldiaminopimelate aminotransferase [EC:2.6.1.11 2.6.1.17]	ec:2.6.1.17	K00821	---	---	1	1	1	1	1	1	1	1	1	0	1	0	1	1	1	1	1	2	0	1	1	1	1	1	0	0	1	0	1	1	1	1	1	1	1
	906	M00845	Arginine biosynthesis, glutamate => acetylcitrulline => arginine	map01110	Biosynthesis of secondary metabolites	---	---	---	argD	acetylornithine/N-succinyldiaminopimelate aminotransferase [EC:2.6.1.11 2.6.1.17]	ec:2.6.1.11	K00821	---	---	1	1	1	1	1	1	1	1	1	0	1	0	1	1	1	1	1	2	0	1	1	1	1	1	0	0	1	0	1	1	1	1	1	1	1
	907	M00845	Arginine biosynthesis, glutamate => acetylcitrulline => arginine	map01110	Biosynthesis of secondary metabolites	---	---	---	argD	acetylornithine/N-succinyldiaminopimelate aminotransferase [EC:2.6.1.11 2.6.1.17]	ec:2.6.1.17	K00821	---	---	1	1	1	1	1	1	1	1	1	0	1	0	1	1	1	1	1	2	0	1	1	1	1	1	0	0	1	0	1	1	1	1	1	1	1
	908	M00845	Arginine biosynthesis, glutamate => acetylcitrulline => arginine	map01120	Microbial metabolism in diverse environments	---	---	---	argD	acetylornithine/N-succinyldiaminopimelate aminotransferase [EC:2.6.1.11 2.6.1.17]	ec:2.6.1.11	K00821	---	---	1	1	1	1	1	1	1	1	1	0	1	0	1	1	1	1	1	2	0	1	1	1	1	1	0	0	1	0	1	1	1	1	1	1	1
	909	M00845	Arginine biosynthesis, glutamate => acetylcitrulline => arginine	map01120	Microbial metabolism in diverse environments	---	---	---	argD	acetylornithine/N-succinyldiaminopimelate aminotransferase [EC:2.6.1.11 2.6.1.17]	ec:2.6.1.17	K00821	---	---	1	1	1	1	1	1	1	1	1	0	1	0	1	1	1	1	1	2	0	1	1	1	1	1	0	0	1	0	1	1	1	1	1	1	1
	910	M00845	Arginine biosynthesis, glutamate => acetylcitrulline => arginine	map01210	2-Oxocarboxylic acid metabolism	---	---	---	argD	acetylornithine/N-succinyldiaminopimelate aminotransferase [EC:2.6.1.11 2.6.1.17]	ec:2.6.1.11	K00821	---	---	1	1	1	1	1	1	1	1	1	0	1	0	1	1	1	1	1	2	0	1	1	1	1	1	0	0	1	0	1	1	1	1	1	1	1
	911	M00845	Arginine biosynthesis, glutamate => acetylcitrulline => arginine	map01210	2-Oxocarboxylic acid metabolism	---	---	---	argD	acetylornithine/N-succinyldiaminopimelate aminotransferase [EC:2.6.1.11 2.6.1.17]	ec:2.6.1.17	K00821	---	---	1	1	1	1	1	1	1	1	1	0	1	0	1	1	1	1	1	2	0	1	1	1	1	1	0	0	1	0	1	1	1	1	1	1	1
	912	M00845	Arginine biosynthesis, glutamate => acetylcitrulline => arginine	map01230	Biosynthesis of amino acids	---	---	---	argD	acetylornithine/N-succinyldiaminopimelate aminotransferase [EC:2.6.1.11 2.6.1.17]	ec:2.6.1.11	K00821	---	---	1	1	1	1	1	1	1	1	1	0	1	0	1	1	1	1	1	2	0	1	1	1	1	1	0	0	1	0	1	1	1	1	1	1	1
	913	M00845	Arginine biosynthesis, glutamate => acetylcitrulline => arginine	map01230	Biosynthesis of amino acids	---	---	---	argD	acetylornithine/N-succinyldiaminopimelate aminotransferase [EC:2.6.1.11 2.6.1.17]	ec:2.6.1.17	K00821	---	---	1	1	1	1	1	1	1	1	1	0	1	0	1	1	1	1	1	2	0	1	1	1	1	1	0	0	1	0	1	1	1	1	1	1	1
	914	M00845	Arginine biosynthesis, glutamate => acetylcitrulline => arginine	map00220	Arginine biosynthesis	---	---	---	argH, ASL	argininosuccinate lyase [EC:4.3.2.1]	ec:4.3.2.1	K01755	---	---	1	1	1	1	1	1	1	1	1	0	1	1	1	1	1	1	1	1	0	1	1	1	2	1	1	0	1	1	1	2	1	1	1	1	1
	915	M00845	Arginine biosynthesis, glutamate => acetylcitrulline => arginine	map00250	Alanine, aspartate and glutamate metabolism	---	---	---	argH, ASL	argininosuccinate lyase [EC:4.3.2.1]	ec:4.3.2.1	K01755	---	---	1	1	1	1	1	1	1	1	1	0	1	1	1	1	1	1	1	1	0	1	1	1	2	1	1	0	1	1	1	2	1	1	1	1	1
	916	M00845	Arginine biosynthesis, glutamate => acetylcitrulline => arginine	map01100	Metabolic pathways	---	---	---	argH, ASL	argininosuccinate lyase [EC:4.3.2.1]	ec:4.3.2.1	K01755	---	---	1	1	1	1	1	1	1	1	1	0	1	1	1	1	1	1	1	1	0	1	1	1	2	1	1	0	1	1	1	2	1	1	1	1	1
	917	M00845	Arginine biosynthesis, glutamate => acetylcitrulline => arginine	map01110	Biosynthesis of secondary metabolites	---	---	---	argH, ASL	argininosuccinate lyase [EC:4.3.2.1]	ec:4.3.2.1	K01755	---	---	1	1	1	1	1	1	1	1	1	0	1	1	1	1	1	1	1	1	0	1	1	1	2	1	1	0	1	1	1	2	1	1	1	1	1
	918	M00845	Arginine biosynthesis, glutamate => acetylcitrulline => arginine	map01230	Biosynthesis of amino acids	---	---	---	argH, ASL	argininosuccinate lyase [EC:4.3.2.1]	ec:4.3.2.1	K01755	---	---	1	1	1	1	1	1	1	1	1	0	1	1	1	1	1	1	1	1	0	1	1	1	2	1	1	0	1	1	1	2	1	1	1	1	1
	919	M00845	Arginine biosynthesis, glutamate => acetylcitrulline => arginine	map00220	Arginine biosynthesis	---	---	---	argG, ASS1	argininosuccinate synthase [EC:6.3.4.5]	ec:6.3.4.5	K01940	---	---	1	1	1	1	1	2	0	0	1	0	1	1	1	1	1	1	1	1	0	1	1	1	0	1	0	0	1	1	1	1	1	1	1	1	1
	920	M00845	Arginine biosynthesis, glutamate => acetylcitrulline => arginine	map00250	Alanine, aspartate and glutamate metabolism	---	---	---	argG, ASS1	argininosuccinate synthase [EC:6.3.4.5]	ec:6.3.4.5	K01940	---	---	1	1	1	1	1	2	0	0	1	0	1	1	1	1	1	1	1	1	0	1	1	1	0	1	0	0	1	1	1	1	1	1	1	1	1
	921	M00845	Arginine biosynthesis, glutamate => acetylcitrulline => arginine	map01100	Metabolic pathways	---	---	---	argG, ASS1	argininosuccinate synthase [EC:6.3.4.5]	ec:6.3.4.5	K01940	---	---	1	1	1	1	1	2	0	0	1	0	1	1	1	1	1	1	1	1	0	1	1	1	0	1	0	0	1	1	1	1	1	1	1	1	1
	922	M00845	Arginine biosynthesis, glutamate => acetylcitrulline => arginine	map01110	Biosynthesis of secondary metabolites	---	---	---	argG, ASS1	argininosuccinate synthase [EC:6.3.4.5]	ec:6.3.4.5	K01940	---	---	1	1	1	1	1	2	0	0	1	0	1	1	1	1	1	1	1	1	0	1	1	1	0	1	0	0	1	1	1	1	1	1	1	1	1
	923	M00845	Arginine biosynthesis, glutamate => acetylcitrulline => arginine	map01230	Biosynthesis of amino acids	---	---	---	argG, ASS1	argininosuccinate synthase [EC:6.3.4.5]	ec:6.3.4.5	K01940	---	---	1	1	1	1	1	2	0	0	1	0	1	1	1	1	1	1	1	1	0	1	1	1	0	1	0	0	1	1	1	1	1	1	1	1	1
	924	M00845	Arginine biosynthesis, glutamate => acetylcitrulline => arginine	map05418	Fluid shear stress and atherosclerosis	---	---	---	argG, ASS1	argininosuccinate synthase [EC:6.3.4.5]	ec:6.3.4.5	K01940	---	---	1	1	1	1	1	2	0	0	1	0	1	1	1	1	1	1	1	1	0	1	1	1	0	1	0	0	1	1	1	1	1	1	1	1	1
	925	M00845	Arginine biosynthesis, glutamate => acetylcitrulline => arginine	map00220	Arginine biosynthesis	---	---	---	argE	acetylornithine deacetylase [EC:3.5.1.16]	ec:3.5.1.16	K01438	---	---	1	1	0	2	0	1	1	1	0	0	1	0	0	4	2	0	1	1	0	0	2	4	1	2	0	0	1	0	0	1	0	0	1	3	3
	926	M00845	Arginine biosynthesis, glutamate => acetylcitrulline => arginine	map01100	Metabolic pathways	---	---	---	argE	acetylornithine deacetylase [EC:3.5.1.16]	ec:3.5.1.16	K01438	---	---	1	1	0	2	0	1	1	1	0	0	1	0	0	4	2	0	1	1	0	0	2	4	1	2	0	0	1	0	0	1	0	0	1	3	3
	927	M00845	Arginine biosynthesis, glutamate => acetylcitrulline => arginine	map01110	Biosynthesis of secondary metabolites	---	---	---	argE	acetylornithine deacetylase [EC:3.5.1.16]	ec:3.5.1.16	K01438	---	---	1	1	0	2	0	1	1	1	0	0	1	0	0	4	2	0	1	1	0	0	2	4	1	2	0	0	1	0	0	1	0	0	1	3	3
	928	M00845	Arginine biosynthesis, glutamate => acetylcitrulline => arginine	map01210	2-Oxocarboxylic acid metabolism	---	---	---	argE	acetylornithine deacetylase [EC:3.5.1.16]	ec:3.5.1.16	K01438	---	---	1	1	0	2	0	1	1	1	0	0	1	0	0	4	2	0	1	1	0	0	2	4	1	2	0	0	1	0	0	1	0	0	1	3	3
	929	M00845	Arginine biosynthesis, glutamate => acetylcitrulline => arginine	map01230	Biosynthesis of amino acids	---	---	---	argE	acetylornithine deacetylase [EC:3.5.1.16]	ec:3.5.1.16	K01438	---	---	1	1	0	2	0	1	1	1	0	0	1	0	0	4	2	0	1	1	0	0	2	4	1	2	0	0	1	0	0	1	0	0	1	3	3
	930	M00845	Arginine biosynthesis, glutamate => acetylcitrulline => arginine	map00220	Arginine biosynthesis	---	---	---	argC	N-acetyl-gamma-glutamyl-phosphate reductase [EC:1.2.1.38]	ec:1.2.1.38	K00145	---	---	1	1	1	1	1	1	1	1	1	0	1	1	1	1	1	1	1	1	0	1	1	1	1	1	0	0	1	1	1	1	1	1	1	1	1
	931	M00845	Arginine biosynthesis, glutamate => acetylcitrulline => arginine	map01100	Metabolic pathways	---	---	---	argC	N-acetyl-gamma-glutamyl-phosphate reductase [EC:1.2.1.38]	ec:1.2.1.38	K00145	---	---	1	1	1	1	1	1	1	1	1	0	1	1	1	1	1	1	1	1	0	1	1	1	1	1	0	0	1	1	1	1	1	1	1	1	1
	932	M00845	Arginine biosynthesis, glutamate => acetylcitrulline => arginine	map01110	Biosynthesis of secondary metabolites	---	---	---	argC	N-acetyl-gamma-glutamyl-phosphate reductase [EC:1.2.1.38]	ec:1.2.1.38	K00145	---	---	1	1	1	1	1	1	1	1	1	0	1	1	1	1	1	1	1	1	0	1	1	1	1	1	0	0	1	1	1	1	1	1	1	1	1
	933	M00845	Arginine biosynthesis, glutamate => acetylcitrulline => arginine	map01210	2-Oxocarboxylic acid metabolism	---	---	---	argC	N-acetyl-gamma-glutamyl-phosphate reductase [EC:1.2.1.38]	ec:1.2.1.38	K00145	---	---	1	1	1	1	1	1	1	1	1	0	1	1	1	1	1	1	1	1	0	1	1	1	1	1	0	0	1	1	1	1	1	1	1	1	1
	934	M00845	Arginine biosynthesis, glutamate => acetylcitrulline => arginine	map01230	Biosynthesis of amino acids	---	---	---	argC	N-acetyl-gamma-glutamyl-phosphate reductase [EC:1.2.1.38]	ec:1.2.1.38	K00145	---	---	1	1	1	1	1	1	1	1	1	0	1	1	1	1	1	1	1	1	0	1	1	1	1	1	0	0	1	1	1	1	1	1	1	1	1
	935	M00844	Arginine biosynthesis, ornithine => arginine	map00220	Arginine biosynthesis	---	---	---	OTC, argF, argI	ornithine carbamoyltransferase [EC:2.1.3.3]	ec:2.1.3.3	K00611	---	---	1	1	2	1	1	1	1	0	1	0	1	1	1	1	1	1	1	2	0	1	1	1	1	1	1	0	1	0	1	1	1	1	1	1	1
	936	M00844	Arginine biosynthesis, ornithine => arginine	map01100	Metabolic pathways	---	---	---	OTC, argF, argI	ornithine carbamoyltransferase [EC:2.1.3.3]	ec:2.1.3.3	K00611	---	---	1	1	2	1	1	1	1	0	1	0	1	1	1	1	1	1	1	2	0	1	1	1	1	1	1	0	1	0	1	1	1	1	1	1	1
	937	M00844	Arginine biosynthesis, ornithine => arginine	map01110	Biosynthesis of secondary metabolites	---	---	---	OTC, argF, argI	ornithine carbamoyltransferase [EC:2.1.3.3]	ec:2.1.3.3	K00611	---	---	1	1	2	1	1	1	1	0	1	0	1	1	1	1	1	1	1	2	0	1	1	1	1	1	1	0	1	0	1	1	1	1	1	1	1
	938	M00844	Arginine biosynthesis, ornithine => arginine	map01230	Biosynthesis of amino acids	---	---	---	OTC, argF, argI	ornithine carbamoyltransferase [EC:2.1.3.3]	ec:2.1.3.3	K00611	---	---	1	1	2	1	1	1	1	0	1	0	1	1	1	1	1	1	1	2	0	1	1	1	1	1	1	0	1	0	1	1	1	1	1	1	1
	939	M00844	Arginine biosynthesis, ornithine => arginine	map00220	Arginine biosynthesis	---	---	---	argH, ASL	argininosuccinate lyase [EC:4.3.2.1]	ec:4.3.2.1	K01755	---	---	1	1	1	1	1	1	1	1	1	0	1	1	1	1	1	1	1	1	0	1	1	1	2	1	1	0	1	1	1	2	1	1	1	1	1
	940	M00844	Arginine biosynthesis, ornithine => arginine	map00250	Alanine, aspartate and glutamate metabolism	---	---	---	argH, ASL	argininosuccinate lyase [EC:4.3.2.1]	ec:4.3.2.1	K01755	---	---	1	1	1	1	1	1	1	1	1	0	1	1	1	1	1	1	1	1	0	1	1	1	2	1	1	0	1	1	1	2	1	1	1	1	1
	941	M00844	Arginine biosynthesis, ornithine => arginine	map01100	Metabolic pathways	---	---	---	argH, ASL	argininosuccinate lyase [EC:4.3.2.1]	ec:4.3.2.1	K01755	---	---	1	1	1	1	1	1	1	1	1	0	1	1	1	1	1	1	1	1	0	1	1	1	2	1	1	0	1	1	1	2	1	1	1	1	1
	942	M00844	Arginine biosynthesis, ornithine => arginine	map01110	Biosynthesis of secondary metabolites	---	---	---	argH, ASL	argininosuccinate lyase [EC:4.3.2.1]	ec:4.3.2.1	K01755	---	---	1	1	1	1	1	1	1	1	1	0	1	1	1	1	1	1	1	1	0	1	1	1	2	1	1	0	1	1	1	2	1	1	1	1	1
	943	M00844	Arginine biosynthesis, ornithine => arginine	map01230	Biosynthesis of amino acids	---	---	---	argH, ASL	argininosuccinate lyase [EC:4.3.2.1]	ec:4.3.2.1	K01755	---	---	1	1	1	1	1	1	1	1	1	0	1	1	1	1	1	1	1	1	0	1	1	1	2	1	1	0	1	1	1	2	1	1	1	1	1
	944	M00844	Arginine biosynthesis, ornithine => arginine	map00220	Arginine biosynthesis	---	---	---	argG, ASS1	argininosuccinate synthase [EC:6.3.4.5]	ec:6.3.4.5	K01940	---	---	1	1	1	1	1	2	0	0	1	0	1	1	1	1	1	1	1	1	0	1	1	1	0	1	0	0	1	1	1	1	1	1	1	1	1
	945	M00844	Arginine biosynthesis, ornithine => arginine	map00250	Alanine, aspartate and glutamate metabolism	---	---	---	argG, ASS1	argininosuccinate synthase [EC:6.3.4.5]	ec:6.3.4.5	K01940	---	---	1	1	1	1	1	2	0	0	1	0	1	1	1	1	1	1	1	1	0	1	1	1	0	1	0	0	1	1	1	1	1	1	1	1	1
	946	M00844	Arginine biosynthesis, ornithine => arginine	map01100	Metabolic pathways	---	---	---	argG, ASS1	argininosuccinate synthase [EC:6.3.4.5]	ec:6.3.4.5	K01940	---	---	1	1	1	1	1	2	0	0	1	0	1	1	1	1	1	1	1	1	0	1	1	1	0	1	0	0	1	1	1	1	1	1	1	1	1
	947	M00844	Arginine biosynthesis, ornithine => arginine	map01110	Biosynthesis of secondary metabolites	---	---	---	argG, ASS1	argininosuccinate synthase [EC:6.3.4.5]	ec:6.3.4.5	K01940	---	---	1	1	1	1	1	2	0	0	1	0	1	1	1	1	1	1	1	1	0	1	1	1	0	1	0	0	1	1	1	1	1	1	1	1	1
	948	M00844	Arginine biosynthesis, ornithine => arginine	map01230	Biosynthesis of amino acids	---	---	---	argG, ASS1	argininosuccinate synthase [EC:6.3.4.5]	ec:6.3.4.5	K01940	---	---	1	1	1	1	1	2	0	0	1	0	1	1	1	1	1	1	1	1	0	1	1	1	0	1	0	0	1	1	1	1	1	1	1	1	1
	949	M00844	Arginine biosynthesis, ornithine => arginine	map05418	Fluid shear stress and atherosclerosis	---	---	---	argG, ASS1	argininosuccinate synthase [EC:6.3.4.5]	ec:6.3.4.5	K01940	---	---	1	1	1	1	1	2	0	0	1	0	1	1	1	1	1	1	1	1	0	1	1	1	0	1	0	0	1	1	1	1	1	1	1	1	1
	950	M00843	L-threo-Tetrahydrobiopterin biosynthesis, GTP => L-threo-BH4	map00790	Folate biosynthesis	---	---	---	queD, ptpS, PTS	6-pyruvoyltetrahydropterin/6-carboxytetrahydropterin synthase [EC:4.2.3.12 4.1.2.50]	ec:4.2.3.12	K01737	---	---	0	2	1	0	1	1	1	0	1	2	1	1	1	0	0	1	0	2	2	1	0	0	1	0	0	3	1	2	1	2	1	1	2	0	0
	951	M00843	L-threo-Tetrahydrobiopterin biosynthesis, GTP => L-threo-BH4	map00790	Folate biosynthesis	---	---	---	queD, ptpS, PTS	6-pyruvoyltetrahydropterin/6-carboxytetrahydropterin synthase [EC:4.2.3.12 4.1.2.50]	ec:4.1.2.50	K01737	---	---	0	2	1	0	1	1	1	0	1	2	1	1	1	0	0	1	0	2	2	1	0	0	1	0	0	3	1	2	1	2	1	1	2	0	0
	952	M00843	L-threo-Tetrahydrobiopterin biosynthesis, GTP => L-threo-BH4	map01100	Metabolic pathways	---	---	---	queD, ptpS, PTS	6-pyruvoyltetrahydropterin/6-carboxytetrahydropterin synthase [EC:4.2.3.12 4.1.2.50]	ec:4.2.3.12	K01737	---	---	0	2	1	0	1	1	1	0	1	2	1	1	1	0	0	1	0	2	2	1	0	0	1	0	0	3	1	2	1	2	1	1	2	0	0
	953	M00843	L-threo-Tetrahydrobiopterin biosynthesis, GTP => L-threo-BH4	map01100	Metabolic pathways	---	---	---	queD, ptpS, PTS	6-pyruvoyltetrahydropterin/6-carboxytetrahydropterin synthase [EC:4.2.3.12 4.1.2.50]	ec:4.1.2.50	K01737	---	---	0	2	1	0	1	1	1	0	1	2	1	1	1	0	0	1	0	2	2	1	0	0	1	0	0	3	1	2	1	2	1	1	2	0	0
	954	M00843	L-threo-Tetrahydrobiopterin biosynthesis, GTP => L-threo-BH4	map01240	Biosynthesis of cofactors	---	---	---	queD, ptpS, PTS	6-pyruvoyltetrahydropterin/6-carboxytetrahydropterin synthase [EC:4.2.3.12 4.1.2.50]	ec:4.2.3.12	K01737	---	---	0	2	1	0	1	1	1	0	1	2	1	1	1	0	0	1	0	2	2	1	0	0	1	0	0	3	1	2	1	2	1	1	2	0	0
	955	M00843	L-threo-Tetrahydrobiopterin biosynthesis, GTP => L-threo-BH4	map01240	Biosynthesis of cofactors	---	---	---	queD, ptpS, PTS	6-pyruvoyltetrahydropterin/6-carboxytetrahydropterin synthase [EC:4.2.3.12 4.1.2.50]	ec:4.1.2.50	K01737	---	---	0	2	1	0	1	1	1	0	1	2	1	1	1	0	0	1	0	2	2	1	0	0	1	0	0	3	1	2	1	2	1	1	2	0	0
	956	M00843	L-threo-Tetrahydrobiopterin biosynthesis, GTP => L-threo-BH4	map00790	Folate biosynthesis	---	---	---	GCH1, folE	GTP cyclohydrolase IA [EC:3.5.4.16]	ec:3.5.4.16	K01495	---	---	0	1	0	0	1	1	1	0	0	1	1	1	1	0	0	1	0	1	1	0	0	0	0	0	0	3	1	3	1	0	0	1	1	0	0
	957	M00843	L-threo-Tetrahydrobiopterin biosynthesis, GTP => L-threo-BH4	map01100	Metabolic pathways	---	---	---	GCH1, folE	GTP cyclohydrolase IA [EC:3.5.4.16]	ec:3.5.4.16	K01495	---	---	0	1	0	0	1	1	1	0	0	1	1	1	1	0	0	1	0	1	1	0	0	0	0	0	0	3	1	3	1	0	0	1	1	0	0
	958	M00843	L-threo-Tetrahydrobiopterin biosynthesis, GTP => L-threo-BH4	map01240	Biosynthesis of cofactors	---	---	---	GCH1, folE	GTP cyclohydrolase IA [EC:3.5.4.16]	ec:3.5.4.16	K01495	---	---	0	1	0	0	1	1	1	0	0	1	1	1	1	0	0	1	0	1	1	0	0	0	0	0	0	3	1	3	1	0	0	1	1	0	0
	959	M00842	Tetrahydrobiopterin biosynthesis, GTP => BH4	map00790	Folate biosynthesis	---	---	---	queD, ptpS, PTS	6-pyruvoyltetrahydropterin/6-carboxytetrahydropterin synthase [EC:4.2.3.12 4.1.2.50]	ec:4.2.3.12	K01737	---	---	0	2	1	0	1	1	1	0	1	2	1	1	1	0	0	1	0	2	2	1	0	0	1	0	0	3	1	2	1	2	1	1	2	0	0
	960	M00842	Tetrahydrobiopterin biosynthesis, GTP => BH4	map00790	Folate biosynthesis	---	---	---	queD, ptpS, PTS	6-pyruvoyltetrahydropterin/6-carboxytetrahydropterin synthase [EC:4.2.3.12 4.1.2.50]	ec:4.1.2.50	K01737	---	---	0	2	1	0	1	1	1	0	1	2	1	1	1	0	0	1	0	2	2	1	0	0	1	0	0	3	1	2	1	2	1	1	2	0	0
	961	M00842	Tetrahydrobiopterin biosynthesis, GTP => BH4	map01100	Metabolic pathways	---	---	---	queD, ptpS, PTS	6-pyruvoyltetrahydropterin/6-carboxytetrahydropterin synthase [EC:4.2.3.12 4.1.2.50]	ec:4.2.3.12	K01737	---	---	0	2	1	0	1	1	1	0	1	2	1	1	1	0	0	1	0	2	2	1	0	0	1	0	0	3	1	2	1	2	1	1	2	0	0
	962	M00842	Tetrahydrobiopterin biosynthesis, GTP => BH4	map01100	Metabolic pathways	---	---	---	queD, ptpS, PTS	6-pyruvoyltetrahydropterin/6-carboxytetrahydropterin synthase [EC:4.2.3.12 4.1.2.50]	ec:4.1.2.50	K01737	---	---	0	2	1	0	1	1	1	0	1	2	1	1	1	0	0	1	0	2	2	1	0	0	1	0	0	3	1	2	1	2	1	1	2	0	0
	963	M00842	Tetrahydrobiopterin biosynthesis, GTP => BH4	map01240	Biosynthesis of cofactors	---	---	---	queD, ptpS, PTS	6-pyruvoyltetrahydropterin/6-carboxytetrahydropterin synthase [EC:4.2.3.12 4.1.2.50]	ec:4.2.3.12	K01737	---	---	0	2	1	0	1	1	1	0	1	2	1	1	1	0	0	1	0	2	2	1	0	0	1	0	0	3	1	2	1	2	1	1	2	0	0
	964	M00842	Tetrahydrobiopterin biosynthesis, GTP => BH4	map01240	Biosynthesis of cofactors	---	---	---	queD, ptpS, PTS	6-pyruvoyltetrahydropterin/6-carboxytetrahydropterin synthase [EC:4.2.3.12 4.1.2.50]	ec:4.1.2.50	K01737	---	---	0	2	1	0	1	1	1	0	1	2	1	1	1	0	0	1	0	2	2	1	0	0	1	0	0	3	1	2	1	2	1	1	2	0	0
	965	M00842	Tetrahydrobiopterin biosynthesis, GTP => BH4	map00790	Folate biosynthesis	---	---	---	GCH1, folE	GTP cyclohydrolase IA [EC:3.5.4.16]	ec:3.5.4.16	K01495	---	---	0	1	0	0	1	1	1	0	0	1	1	1	1	0	0	1	0	1	1	0	0	0	0	0	0	3	1	3	1	0	0	1	1	0	0
	966	M00842	Tetrahydrobiopterin biosynthesis, GTP => BH4	map01100	Metabolic pathways	---	---	---	GCH1, folE	GTP cyclohydrolase IA [EC:3.5.4.16]	ec:3.5.4.16	K01495	---	---	0	1	0	0	1	1	1	0	0	1	1	1	1	0	0	1	0	1	1	0	0	0	0	0	0	3	1	3	1	0	0	1	1	0	0
	967	M00842	Tetrahydrobiopterin biosynthesis, GTP => BH4	map01240	Biosynthesis of cofactors	---	---	---	GCH1, folE	GTP cyclohydrolase IA [EC:3.5.4.16]	ec:3.5.4.16	K01495	---	---	0	1	0	0	1	1	1	0	0	1	1	1	1	0	0	1	0	1	1	0	0	0	0	0	0	3	1	3	1	0	0	1	1	0	0
	968	M00841	Tetrahydrofolate biosynthesis, mediated by PTPS, GTP => THF	map00790	Folate biosynthesis	---	---	---	folC	dihydrofolate synthase / folylpolyglutamate synthase [EC:6.3.2.12 6.3.2.17]	ec:6.3.2.12	K11754	---	---	1	1	1	1	1	1	1	0	1	1	1	1	1	1	1	1	1	1	1	1	1	1	1	1	0	1	1	1	1	1	1	1	1	1	1
	969	M00841	Tetrahydrofolate biosynthesis, mediated by PTPS, GTP => THF	map00790	Folate biosynthesis	---	---	---	folC	dihydrofolate synthase / folylpolyglutamate synthase [EC:6.3.2.12 6.3.2.17]	ec:6.3.2.17	K11754	---	---	1	1	1	1	1	1	1	0	1	1	1	1	1	1	1	1	1	1	1	1	1	1	1	1	0	1	1	1	1	1	1	1	1	1	1
	970	M00841	Tetrahydrofolate biosynthesis, mediated by PTPS, GTP => THF	map01100	Metabolic pathways	---	---	---	folC	dihydrofolate synthase / folylpolyglutamate synthase [EC:6.3.2.12 6.3.2.17]	ec:6.3.2.12	K11754	---	---	1	1	1	1	1	1	1	0	1	1	1	1	1	1	1	1	1	1	1	1	1	1	1	1	0	1	1	1	1	1	1	1	1	1	1
	971	M00841	Tetrahydrofolate biosynthesis, mediated by PTPS, GTP => THF	map01100	Metabolic pathways	---	---	---	folC	dihydrofolate synthase / folylpolyglutamate synthase [EC:6.3.2.12 6.3.2.17]	ec:6.3.2.17	K11754	---	---	1	1	1	1	1	1	1	0	1	1	1	1	1	1	1	1	1	1	1	1	1	1	1	1	0	1	1	1	1	1	1	1	1	1	1
	972	M00841	Tetrahydrofolate biosynthesis, mediated by PTPS, GTP => THF	map01240	Biosynthesis of cofactors	---	---	---	folC	dihydrofolate synthase / folylpolyglutamate synthase [EC:6.3.2.12 6.3.2.17]	ec:6.3.2.12	K11754	---	---	1	1	1	1	1	1	1	0	1	1	1	1	1	1	1	1	1	1	1	1	1	1	1	1	0	1	1	1	1	1	1	1	1	1	1
	973	M00841	Tetrahydrofolate biosynthesis, mediated by PTPS, GTP => THF	map01240	Biosynthesis of cofactors	---	---	---	folC	dihydrofolate synthase / folylpolyglutamate synthase [EC:6.3.2.12 6.3.2.17]	ec:6.3.2.17	K11754	---	---	1	1	1	1	1	1	1	0	1	1	1	1	1	1	1	1	1	1	1	1	1	1	1	1	0	1	1	1	1	1	1	1	1	1	1
	974	M00841	Tetrahydrofolate biosynthesis, mediated by PTPS, GTP => THF	map00790	Folate biosynthesis	---	---	---	GCH1, folE	GTP cyclohydrolase IA [EC:3.5.4.16]	ec:3.5.4.16	K01495	---	---	0	1	0	0	1	1	1	0	0	1	1	1	1	0	0	1	0	1	1	0	0	0	0	0	0	3	1	3	1	0	0	1	1	0	0
	975	M00841	Tetrahydrofolate biosynthesis, mediated by PTPS, GTP => THF	map01100	Metabolic pathways	---	---	---	GCH1, folE	GTP cyclohydrolase IA [EC:3.5.4.16]	ec:3.5.4.16	K01495	---	---	0	1	0	0	1	1	1	0	0	1	1	1	1	0	0	1	0	1	1	0	0	0	0	0	0	3	1	3	1	0	0	1	1	0	0
	976	M00841	Tetrahydrofolate biosynthesis, mediated by PTPS, GTP => THF	map01240	Biosynthesis of cofactors	---	---	---	GCH1, folE	GTP cyclohydrolase IA [EC:3.5.4.16]	ec:3.5.4.16	K01495	---	---	0	1	0	0	1	1	1	0	0	1	1	1	1	0	0	1	0	1	1	0	0	0	0	0	0	3	1	3	1	0	0	1	1	0	0
	977	M00840	Tetrahydrofolate biosynthesis, mediated by ribA and trpF, GTP => THF	map00740	Riboflavin metabolism	---	---	---	ribBA	3,4-dihydroxy 2-butanone 4-phosphate synthase / GTP cyclohydrolase II [EC:4.1.99.12 3.5.4.25]	ec:4.1.99.12	K14652	---	---	2	1	1	1	1	1	1	0	1	0	1	1	0	1	1	1	2	1	1	2	1	1	2	1	1	1	1	1	1	1	1	1	1	1	1
	978	M00840	Tetrahydrofolate biosynthesis, mediated by ribA and trpF, GTP => THF	map00740	Riboflavin metabolism	---	---	---	ribBA	3,4-dihydroxy 2-butanone 4-phosphate synthase / GTP cyclohydrolase II [EC:4.1.99.12 3.5.4.25]	ec:3.5.4.25	K14652	---	---	2	1	1	1	1	1	1	0	1	0	1	1	0	1	1	1	2	1	1	2	1	1	2	1	1	1	1	1	1	1	1	1	1	1	1
	979	M00840	Tetrahydrofolate biosynthesis, mediated by ribA and trpF, GTP => THF	map00790	Folate biosynthesis	---	---	---	ribBA	3,4-dihydroxy 2-butanone 4-phosphate synthase / GTP cyclohydrolase II [EC:4.1.99.12 3.5.4.25]	ec:4.1.99.12	K14652	---	---	2	1	1	1	1	1	1	0	1	0	1	1	0	1	1	1	2	1	1	2	1	1	2	1	1	1	1	1	1	1	1	1	1	1	1
	980	M00840	Tetrahydrofolate biosynthesis, mediated by ribA and trpF, GTP => THF	map00790	Folate biosynthesis	---	---	---	ribBA	3,4-dihydroxy 2-butanone 4-phosphate synthase / GTP cyclohydrolase II [EC:4.1.99.12 3.5.4.25]	ec:3.5.4.25	K14652	---	---	2	1	1	1	1	1	1	0	1	0	1	1	0	1	1	1	2	1	1	2	1	1	2	1	1	1	1	1	1	1	1	1	1	1	1
	981	M00840	Tetrahydrofolate biosynthesis, mediated by ribA and trpF, GTP => THF	map01100	Metabolic pathways	---	---	---	ribBA	3,4-dihydroxy 2-butanone 4-phosphate synthase / GTP cyclohydrolase II [EC:4.1.99.12 3.5.4.25]	ec:4.1.99.12	K14652	---	---	2	1	1	1	1	1	1	0	1	0	1	1	0	1	1	1	2	1	1	2	1	1	2	1	1	1	1	1	1	1	1	1	1	1	1
	982	M00840	Tetrahydrofolate biosynthesis, mediated by ribA and trpF, GTP => THF	map01100	Metabolic pathways	---	---	---	ribBA	3,4-dihydroxy 2-butanone 4-phosphate synthase / GTP cyclohydrolase II [EC:4.1.99.12 3.5.4.25]	ec:3.5.4.25	K14652	---	---	2	1	1	1	1	1	1	0	1	0	1	1	0	1	1	1	2	1	1	2	1	1	2	1	1	1	1	1	1	1	1	1	1	1	1
	983	M00840	Tetrahydrofolate biosynthesis, mediated by ribA and trpF, GTP => THF	map01110	Biosynthesis of secondary metabolites	---	---	---	ribBA	3,4-dihydroxy 2-butanone 4-phosphate synthase / GTP cyclohydrolase II [EC:4.1.99.12 3.5.4.25]	ec:4.1.99.12	K14652	---	---	2	1	1	1	1	1	1	0	1	0	1	1	0	1	1	1	2	1	1	2	1	1	2	1	1	1	1	1	1	1	1	1	1	1	1
	984	M00840	Tetrahydrofolate biosynthesis, mediated by ribA and trpF, GTP => THF	map01110	Biosynthesis of secondary metabolites	---	---	---	ribBA	3,4-dihydroxy 2-butanone 4-phosphate synthase / GTP cyclohydrolase II [EC:4.1.99.12 3.5.4.25]	ec:3.5.4.25	K14652	---	---	2	1	1	1	1	1	1	0	1	0	1	1	0	1	1	1	2	1	1	2	1	1	2	1	1	1	1	1	1	1	1	1	1	1	1
	985	M00840	Tetrahydrofolate biosynthesis, mediated by ribA and trpF, GTP => THF	map01240	Biosynthesis of cofactors	---	---	---	ribBA	3,4-dihydroxy 2-butanone 4-phosphate synthase / GTP cyclohydrolase II [EC:4.1.99.12 3.5.4.25]	ec:4.1.99.12	K14652	---	---	2	1	1	1	1	1	1	0	1	0	1	1	0	1	1	1	2	1	1	2	1	1	2	1	1	1	1	1	1	1	1	1	1	1	1
	986	M00840	Tetrahydrofolate biosynthesis, mediated by ribA and trpF, GTP => THF	map01240	Biosynthesis of cofactors	---	---	---	ribBA	3,4-dihydroxy 2-butanone 4-phosphate synthase / GTP cyclohydrolase II [EC:4.1.99.12 3.5.4.25]	ec:3.5.4.25	K14652	---	---	2	1	1	1	1	1	1	0	1	0	1	1	0	1	1	1	2	1	1	2	1	1	2	1	1	1	1	1	1	1	1	1	1	1	1
	987	M00840	Tetrahydrofolate biosynthesis, mediated by ribA and trpF, GTP => THF	map00790	Folate biosynthesis	---	---	---	folB	7,8-dihydroneopterin aldolase/epimerase/oxygenase [EC:4.1.2.25 5.1.99.8 1.13.11.81]	ec:4.1.2.25	K01633	---	---	1	1	1	1	1	0	1	1	1	0	1	1	0	1	1	1	1	1	0	1	1	1	1	1	1	1	1	0	1	1	1	1	1	1	1
	988	M00840	Tetrahydrofolate biosynthesis, mediated by ribA and trpF, GTP => THF	map00790	Folate biosynthesis	---	---	---	folB	7,8-dihydroneopterin aldolase/epimerase/oxygenase [EC:4.1.2.25 5.1.99.8 1.13.11.81]	ec:5.1.99.8	K01633	---	---	1	1	1	1	1	0	1	1	1	0	1	1	0	1	1	1	1	1	0	1	1	1	1	1	1	1	1	0	1	1	1	1	1	1	1
	989	M00840	Tetrahydrofolate biosynthesis, mediated by ribA and trpF, GTP => THF	map00790	Folate biosynthesis	---	---	---	folB	7,8-dihydroneopterin aldolase/epimerase/oxygenase [EC:4.1.2.25 5.1.99.8 1.13.11.81]	ec:1.13.11.81	K01633	---	---	1	1	1	1	1	0	1	1	1	0	1	1	0	1	1	1	1	1	0	1	1	1	1	1	1	1	1	0	1	1	1	1	1	1	1
	990	M00840	Tetrahydrofolate biosynthesis, mediated by ribA and trpF, GTP => THF	map01100	Metabolic pathways	---	---	---	folB	7,8-dihydroneopterin aldolase/epimerase/oxygenase [EC:4.1.2.25 5.1.99.8 1.13.11.81]	ec:4.1.2.25	K01633	---	---	1	1	1	1	1	0	1	1	1	0	1	1	0	1	1	1	1	1	0	1	1	1	1	1	1	1	1	0	1	1	1	1	1	1	1
	991	M00840	Tetrahydrofolate biosynthesis, mediated by ribA and trpF, GTP => THF	map01100	Metabolic pathways	---	---	---	folB	7,8-dihydroneopterin aldolase/epimerase/oxygenase [EC:4.1.2.25 5.1.99.8 1.13.11.81]	ec:5.1.99.8	K01633	---	---	1	1	1	1	1	0	1	1	1	0	1	1	0	1	1	1	1	1	0	1	1	1	1	1	1	1	1	0	1	1	1	1	1	1	1
	992	M00840	Tetrahydrofolate biosynthesis, mediated by ribA and trpF, GTP => THF	map01100	Metabolic pathways	---	---	---	folB	7,8-dihydroneopterin aldolase/epimerase/oxygenase [EC:4.1.2.25 5.1.99.8 1.13.11.81]	ec:1.13.11.81	K01633	---	---	1	1	1	1	1	0	1	1	1	0	1	1	0	1	1	1	1	1	0	1	1	1	1	1	1	1	1	0	1	1	1	1	1	1	1
	993	M00840	Tetrahydrofolate biosynthesis, mediated by ribA and trpF, GTP => THF	map01240	Biosynthesis of cofactors	---	---	---	folB	7,8-dihydroneopterin aldolase/epimerase/oxygenase [EC:4.1.2.25 5.1.99.8 1.13.11.81]	ec:4.1.2.25	K01633	---	---	1	1	1	1	1	0	1	1	1	0	1	1	0	1	1	1	1	1	0	1	1	1	1	1	1	1	1	0	1	1	1	1	1	1	1
	994	M00840	Tetrahydrofolate biosynthesis, mediated by ribA and trpF, GTP => THF	map01240	Biosynthesis of cofactors	---	---	---	folB	7,8-dihydroneopterin aldolase/epimerase/oxygenase [EC:4.1.2.25 5.1.99.8 1.13.11.81]	ec:5.1.99.8	K01633	---	---	1	1	1	1	1	0	1	1	1	0	1	1	0	1	1	1	1	1	0	1	1	1	1	1	1	1	1	0	1	1	1	1	1	1	1
	995	M00840	Tetrahydrofolate biosynthesis, mediated by ribA and trpF, GTP => THF	map01240	Biosynthesis of cofactors	---	---	---	folB	7,8-dihydroneopterin aldolase/epimerase/oxygenase [EC:4.1.2.25 5.1.99.8 1.13.11.81]	ec:1.13.11.81	K01633	---	---	1	1	1	1	1	0	1	1	1	0	1	1	0	1	1	1	1	1	0	1	1	1	1	1	1	1	1	0	1	1	1	1	1	1	1
	996	M00840	Tetrahydrofolate biosynthesis, mediated by ribA and trpF, GTP => THF	map00670	One carbon pool by folate	---	---	---	DHFR, folA	dihydrofolate reductase [EC:1.5.1.3]	ec:1.5.1.3	K00287	---	---	0	1	1	0	1	1	1	0	1	1	1	1	1	1	0	0	0	1	0	1	0	1	1	0	1	1	1	1	1	0	1	1	1	1	1
	997	M00840	Tetrahydrofolate biosynthesis, mediated by ribA and trpF, GTP => THF	map00790	Folate biosynthesis	---	---	---	DHFR, folA	dihydrofolate reductase [EC:1.5.1.3]	ec:1.5.1.3	K00287	---	---	0	1	1	0	1	1	1	0	1	1	1	1	1	1	0	0	0	1	0	1	0	1	1	0	1	1	1	1	1	0	1	1	1	1	1
	998	M00840	Tetrahydrofolate biosynthesis, mediated by ribA and trpF, GTP => THF	map01100	Metabolic pathways	---	---	---	DHFR, folA	dihydrofolate reductase [EC:1.5.1.3]	ec:1.5.1.3	K00287	---	---	0	1	1	0	1	1	1	0	1	1	1	1	1	1	0	0	0	1	0	1	0	1	1	0	1	1	1	1	1	0	1	1	1	1	1
	999	M00840	Tetrahydrofolate biosynthesis, mediated by ribA and trpF, GTP => THF	map01240	Biosynthesis of cofactors	---	---	---	DHFR, folA	dihydrofolate reductase [EC:1.5.1.3]	ec:1.5.1.3	K00287	---	---	0	1	1	0	1	1	1	0	1	1	1	1	1	1	0	0	0	1	0	1	0	1	1	0	1	1	1	1	1	0	1	1	1	1	1
	1000	M00840	Tetrahydrofolate biosynthesis, mediated by ribA and trpF, GTP => THF	map01523	Antifolate resistance	---	---	---	DHFR, folA	dihydrofolate reductase [EC:1.5.1.3]	ec:1.5.1.3	K00287	---	---	0	1	1	0	1	1	1	0	1	1	1	1	1	1	0	0	0	1	0	1	0	1	1	0	1	1	1	1	1	0	1	1	1	1	1
	1001	M00835	Pyocyanine biosynthesis, chorismate => pyocyanine	map00405	Phenazine biosynthesis	---	---	---	phzF	trans-2,3-dihydro-3-hydroxyanthranilate isomerase [EC:5.3.3.17]	ec:5.3.3.17	K06998	---	---	0	1	0	1	1	1	1	0	2	0	0	1	1	2	1	0	0	1	0	2	1	2	1	1	0	0	1	0	0	1	2	0	1	2	2
	1002	M00835	Pyocyanine biosynthesis, chorismate => pyocyanine	map01100	Metabolic pathways	---	---	---	phzF	trans-2,3-dihydro-3-hydroxyanthranilate isomerase [EC:5.3.3.17]	ec:5.3.3.17	K06998	---	---	0	1	0	1	1	1	1	0	2	0	0	1	1	2	1	0	0	1	0	2	1	2	1	1	0	0	1	0	0	1	2	0	1	2	2
	1003	M00835	Pyocyanine biosynthesis, chorismate => pyocyanine	map01110	Biosynthesis of secondary metabolites	---	---	---	phzF	trans-2,3-dihydro-3-hydroxyanthranilate isomerase [EC:5.3.3.17]	ec:5.3.3.17	K06998	---	---	0	1	0	1	1	1	1	0	2	0	0	1	1	2	1	0	0	1	0	2	1	2	1	1	0	0	1	0	0	1	2	0	1	2	2
	1004	M00835	Pyocyanine biosynthesis, chorismate => pyocyanine	map02024	Quorum sensing	---	---	---	phzF	trans-2,3-dihydro-3-hydroxyanthranilate isomerase [EC:5.3.3.17]	ec:5.3.3.17	K06998	---	---	0	1	0	1	1	1	1	0	2	0	0	1	1	2	1	0	0	1	0	2	1	2	1	1	0	0	1	0	0	1	2	0	1	2	2
	1005	M00835	Pyocyanine biosynthesis, chorismate => pyocyanine	map00405	Phenazine biosynthesis	---	---	---	phzS	5-methylphenazine-1-carboxylate 1-monooxygenase [EC:1.14.13.218]	ec:1.14.13.218	K20940	---	---	0	0	0	1	0	0	0	0	0	0	0	0	0	1	0	0	0	0	0	0	0	1	0	1	0	0	0	0	0	0	0	0	0	1	1
	1006	M00835	Pyocyanine biosynthesis, chorismate => pyocyanine	map01100	Metabolic pathways	---	---	---	phzS	5-methylphenazine-1-carboxylate 1-monooxygenase [EC:1.14.13.218]	ec:1.14.13.218	K20940	---	---	0	0	0	1	0	0	0	0	0	0	0	0	0	1	0	0	0	0	0	0	0	1	0	1	0	0	0	0	0	0	0	0	0	1	1
	1007	M00835	Pyocyanine biosynthesis, chorismate => pyocyanine	map01110	Biosynthesis of secondary metabolites	---	---	---	phzS	5-methylphenazine-1-carboxylate 1-monooxygenase [EC:1.14.13.218]	ec:1.14.13.218	K20940	---	---	0	0	0	1	0	0	0	0	0	0	0	0	0	1	0	0	0	0	0	0	0	1	0	1	0	0	0	0	0	0	0	0	0	1	1
	1008	M00824	9-membered enediyne core biosynthesis, malonyl-CoA => 3-hydroxyhexadeca-4,6,8,10,12,14-hexaenoyl-ACP => 9-membered enediyne core	map01059	Biosynthesis of enediyne antibiotics	---	---	---	sgcE4, ncsE4, kedE4	enediyne biosynthesis protein E4	---	K21162	---	---	1	0	0	0	0	1	1	0	0	0	0	0	0	1	1	0	1	1	0	0	1	1	1	0	0	6	1	0	1	0	0	0	0	1	1
	1009	M00824	9-membered enediyne core biosynthesis, malonyl-CoA => 3-hydroxyhexadeca-4,6,8,10,12,14-hexaenoyl-ACP => 9-membered enediyne core	map01100	Metabolic pathways	---	---	---	sgcE4, ncsE4, kedE4	enediyne biosynthesis protein E4	---	K21162	---	---	1	0	0	0	0	1	1	0	0	0	0	0	0	1	1	0	1	1	0	0	1	1	1	0	0	6	1	0	1	0	0	0	0	1	1
	1010	M00824	9-membered enediyne core biosynthesis, malonyl-CoA => 3-hydroxyhexadeca-4,6,8,10,12,14-hexaenoyl-ACP => 9-membered enediyne core	map01110	Biosynthesis of secondary metabolites	---	---	---	sgcE4, ncsE4, kedE4	enediyne biosynthesis protein E4	---	K21162	---	---	1	0	0	0	0	1	1	0	0	0	0	0	0	1	1	0	1	1	0	0	1	1	1	0	0	6	1	0	1	0	0	0	0	1	1
	1011	M00823	Chlortetracycline biosynthesis, pretetramide => chlortetracycline	map00253	Tetracycline biosynthesis	---	---	---	ctcP, cts4, prnC	tetracycline 7-halogenase / FADH2 O2-dependent halogenase [EC:1.14.19.49 1.14.19.-]	ec:1.14.19.49	K14257	---	---	0	0	0	0	0	0	1	0	0	0	0	0	0	0	0	0	0	0	0	0	0	0	1	0	0	0	0	0	0	0	0	0	0	0	0
	1012	M00823	Chlortetracycline biosynthesis, pretetramide => chlortetracycline	map00404	Staurosporine biosynthesis	---	---	---	ctcP, cts4, prnC	tetracycline 7-halogenase / FADH2 O2-dependent halogenase [EC:1.14.19.49 1.14.19.-]	ec:1.14.19.49	K14257	---	---	0	0	0	0	0	0	1	0	0	0	0	0	0	0	0	0	0	0	0	0	0	0	1	0	0	0	0	0	0	0	0	0	0	0	0
	1013	M00823	Chlortetracycline biosynthesis, pretetramide => chlortetracycline	map01057	Biosynthesis of type II polyketide products	---	---	---	ctcP, cts4, prnC	tetracycline 7-halogenase / FADH2 O2-dependent halogenase [EC:1.14.19.49 1.14.19.-]	ec:1.14.19.49	K14257	---	---	0	0	0	0	0	0	1	0	0	0	0	0	0	0	0	0	0	0	0	0	0	0	1	0	0	0	0	0	0	0	0	0	0	0	0
	1014	M00823	Chlortetracycline biosynthesis, pretetramide => chlortetracycline	map01100	Metabolic pathways	---	---	---	ctcP, cts4, prnC	tetracycline 7-halogenase / FADH2 O2-dependent halogenase [EC:1.14.19.49 1.14.19.-]	ec:1.14.19.49	K14257	---	---	0	0	0	0	0	0	1	0	0	0	0	0	0	0	0	0	0	0	0	0	0	0	1	0	0	0	0	0	0	0	0	0	0	0	0
	1015	M00823	Chlortetracycline biosynthesis, pretetramide => chlortetracycline	map01110	Biosynthesis of secondary metabolites	---	---	---	ctcP, cts4, prnC	tetracycline 7-halogenase / FADH2 O2-dependent halogenase [EC:1.14.19.49 1.14.19.-]	ec:1.14.19.49	K14257	---	---	0	0	0	0	0	0	1	0	0	0	0	0	0	0	0	0	0	0	0	0	0	0	1	0	0	0	0	0	0	0	0	0	0	0	0
	1016	M00804	Complete nitrification, comammox, ammonia => nitrite => nitrate	map00910	Nitrogen metabolism	Nitrogen metabolism	Dissimilatory nitrate reduction, nitrate -> nitrite (narGHI or napAB)	narH, narY, nxrB; nitrate reductase / nitrite oxidoreductase, beta subunit [EC:1.7.5.1 1.7.99.-]	narH, narY, nxrB	nitrate reductase / nitrite oxidoreductase, beta subunit [EC:1.7.5.1 1.7.99.-]	ec:1.7.5.1	K00371	---	---	0	0	0	0	0	0	0	0	1	0	0	0	0	0	0	0	0	0	0	1	0	0	0	0	0	0	0	0	1	0	0	0	0	0	0
	1017	M00804	Complete nitrification, comammox, ammonia => nitrite => nitrate	map00910	Nitrogen metabolism	Nitrogen metabolism	Nitrification, nitrite -> nitrate (nxrAB)	narH, narY, nxrB; nitrate reductase / nitrite oxidoreductase, beta subunit [EC:1.7.5.1 1.7.99.-]	narH, narY, nxrB	nitrate reductase / nitrite oxidoreductase, beta subunit [EC:1.7.5.1 1.7.99.-]	ec:1.7.5.1	K00371	---	---	0	0	0	0	0	0	0	0	1	0	0	0	0	0	0	0	0	0	0	1	0	0	0	0	0	0	0	0	1	0	0	0	0	0	0
	1018	M00804	Complete nitrification, comammox, ammonia => nitrite => nitrate	map01100	Metabolic pathways	Nitrogen metabolism	Dissimilatory nitrate reduction, nitrate -> nitrite (narGHI or napAB)	narH, narY, nxrB; nitrate reductase / nitrite oxidoreductase, beta subunit [EC:1.7.5.1 1.7.99.-]	narH, narY, nxrB	nitrate reductase / nitrite oxidoreductase, beta subunit [EC:1.7.5.1 1.7.99.-]	ec:1.7.5.1	K00371	---	---	0	0	0	0	0	0	0	0	1	0	0	0	0	0	0	0	0	0	0	1	0	0	0	0	0	0	0	0	1	0	0	0	0	0	0
	1019	M00804	Complete nitrification, comammox, ammonia => nitrite => nitrate	map01100	Metabolic pathways	Nitrogen metabolism	Nitrification, nitrite -> nitrate (nxrAB)	narH, narY, nxrB; nitrate reductase / nitrite oxidoreductase, beta subunit [EC:1.7.5.1 1.7.99.-]	narH, narY, nxrB	nitrate reductase / nitrite oxidoreductase, beta subunit [EC:1.7.5.1 1.7.99.-]	ec:1.7.5.1	K00371	---	---	0	0	0	0	0	0	0	0	1	0	0	0	0	0	0	0	0	0	0	1	0	0	0	0	0	0	0	0	1	0	0	0	0	0	0
	1020	M00804	Complete nitrification, comammox, ammonia => nitrite => nitrate	map01120	Microbial metabolism in diverse environments	Nitrogen metabolism	Dissimilatory nitrate reduction, nitrate -> nitrite (narGHI or napAB)	narH, narY, nxrB; nitrate reductase / nitrite oxidoreductase, beta subunit [EC:1.7.5.1 1.7.99.-]	narH, narY, nxrB	nitrate reductase / nitrite oxidoreductase, beta subunit [EC:1.7.5.1 1.7.99.-]	ec:1.7.5.1	K00371	---	---	0	0	0	0	0	0	0	0	1	0	0	0	0	0	0	0	0	0	0	1	0	0	0	0	0	0	0	0	1	0	0	0	0	0	0
	1021	M00804	Complete nitrification, comammox, ammonia => nitrite => nitrate	map01120	Microbial metabolism in diverse environments	Nitrogen metabolism	Nitrification, nitrite -> nitrate (nxrAB)	narH, narY, nxrB; nitrate reductase / nitrite oxidoreductase, beta subunit [EC:1.7.5.1 1.7.99.-]	narH, narY, nxrB	nitrate reductase / nitrite oxidoreductase, beta subunit [EC:1.7.5.1 1.7.99.-]	ec:1.7.5.1	K00371	---	---	0	0	0	0	0	0	0	0	1	0	0	0	0	0	0	0	0	0	0	1	0	0	0	0	0	0	0	0	1	0	0	0	0	0	0
	1022	M00804	Complete nitrification, comammox, ammonia => nitrite => nitrate	map02020	Two-component system	Nitrogen metabolism	Dissimilatory nitrate reduction, nitrate -> nitrite (narGHI or napAB)	narH, narY, nxrB; nitrate reductase / nitrite oxidoreductase, beta subunit [EC:1.7.5.1 1.7.99.-]	narH, narY, nxrB	nitrate reductase / nitrite oxidoreductase, beta subunit [EC:1.7.5.1 1.7.99.-]	ec:1.7.5.1	K00371	---	---	0	0	0	0	0	0	0	0	1	0	0	0	0	0	0	0	0	0	0	1	0	0	0	0	0	0	0	0	1	0	0	0	0	0	0
	1023	M00804	Complete nitrification, comammox, ammonia => nitrite => nitrate	map02020	Two-component system	Nitrogen metabolism	Nitrification, nitrite -> nitrate (nxrAB)	narH, narY, nxrB; nitrate reductase / nitrite oxidoreductase, beta subunit [EC:1.7.5.1 1.7.99.-]	narH, narY, nxrB	nitrate reductase / nitrite oxidoreductase, beta subunit [EC:1.7.5.1 1.7.99.-]	ec:1.7.5.1	K00371	---	---	0	0	0	0	0	0	0	0	1	0	0	0	0	0	0	0	0	0	0	1	0	0	0	0	0	0	0	0	1	0	0	0	0	0	0
	1024	M00804	Complete nitrification, comammox, ammonia => nitrite => nitrate	map00910	Nitrogen metabolism	Nitrogen metabolism	Dissimilatory nitrate reduction, nitrate -> nitrite (narGHI or napAB)	narG, narZ, nxrA; nitrate reductase / nitrite oxidoreductase, alpha subunit [EC:1.7.5.1 1.7.99.-]	narG, narZ, nxrA	nitrate reductase / nitrite oxidoreductase, alpha subunit [EC:1.7.5.1 1.7.99.-]	ec:1.7.5.1	K00370	---	---	0	0	0	0	0	0	0	0	1	0	0	0	0	0	0	0	0	0	0	1	0	0	0	0	0	0	0	0	1	0	0	0	0	0	0
	1025	M00804	Complete nitrification, comammox, ammonia => nitrite => nitrate	map00910	Nitrogen metabolism	Nitrogen metabolism	Nitrification, nitrite -> nitrate (nxrAB)	narG, narZ, nxrA; nitrate reductase / nitrite oxidoreductase, alpha subunit [EC:1.7.5.1 1.7.99.-]	narG, narZ, nxrA	nitrate reductase / nitrite oxidoreductase, alpha subunit [EC:1.7.5.1 1.7.99.-]	ec:1.7.5.1	K00370	---	---	0	0	0	0	0	0	0	0	1	0	0	0	0	0	0	0	0	0	0	1	0	0	0	0	0	0	0	0	1	0	0	0	0	0	0
	1026	M00804	Complete nitrification, comammox, ammonia => nitrite => nitrate	map01100	Metabolic pathways	Nitrogen metabolism	Dissimilatory nitrate reduction, nitrate -> nitrite (narGHI or napAB)	narG, narZ, nxrA; nitrate reductase / nitrite oxidoreductase, alpha subunit [EC:1.7.5.1 1.7.99.-]	narG, narZ, nxrA	nitrate reductase / nitrite oxidoreductase, alpha subunit [EC:1.7.5.1 1.7.99.-]	ec:1.7.5.1	K00370	---	---	0	0	0	0	0	0	0	0	1	0	0	0	0	0	0	0	0	0	0	1	0	0	0	0	0	0	0	0	1	0	0	0	0	0	0
	1027	M00804	Complete nitrification, comammox, ammonia => nitrite => nitrate	map01100	Metabolic pathways	Nitrogen metabolism	Nitrification, nitrite -> nitrate (nxrAB)	narG, narZ, nxrA; nitrate reductase / nitrite oxidoreductase, alpha subunit [EC:1.7.5.1 1.7.99.-]	narG, narZ, nxrA	nitrate reductase / nitrite oxidoreductase, alpha subunit [EC:1.7.5.1 1.7.99.-]	ec:1.7.5.1	K00370	---	---	0	0	0	0	0	0	0	0	1	0	0	0	0	0	0	0	0	0	0	1	0	0	0	0	0	0	0	0	1	0	0	0	0	0	0
	1028	M00804	Complete nitrification, comammox, ammonia => nitrite => nitrate	map01120	Microbial metabolism in diverse environments	Nitrogen metabolism	Dissimilatory nitrate reduction, nitrate -> nitrite (narGHI or napAB)	narG, narZ, nxrA; nitrate reductase / nitrite oxidoreductase, alpha subunit [EC:1.7.5.1 1.7.99.-]	narG, narZ, nxrA	nitrate reductase / nitrite oxidoreductase, alpha subunit [EC:1.7.5.1 1.7.99.-]	ec:1.7.5.1	K00370	---	---	0	0	0	0	0	0	0	0	1	0	0	0	0	0	0	0	0	0	0	1	0	0	0	0	0	0	0	0	1	0	0	0	0	0	0
	1029	M00804	Complete nitrification, comammox, ammonia => nitrite => nitrate	map01120	Microbial metabolism in diverse environments	Nitrogen metabolism	Nitrification, nitrite -> nitrate (nxrAB)	narG, narZ, nxrA; nitrate reductase / nitrite oxidoreductase, alpha subunit [EC:1.7.5.1 1.7.99.-]	narG, narZ, nxrA	nitrate reductase / nitrite oxidoreductase, alpha subunit [EC:1.7.5.1 1.7.99.-]	ec:1.7.5.1	K00370	---	---	0	0	0	0	0	0	0	0	1	0	0	0	0	0	0	0	0	0	0	1	0	0	0	0	0	0	0	0	1	0	0	0	0	0	0
	1030	M00804	Complete nitrification, comammox, ammonia => nitrite => nitrate	map02020	Two-component system	Nitrogen metabolism	Dissimilatory nitrate reduction, nitrate -> nitrite (narGHI or napAB)	narG, narZ, nxrA; nitrate reductase / nitrite oxidoreductase, alpha subunit [EC:1.7.5.1 1.7.99.-]	narG, narZ, nxrA	nitrate reductase / nitrite oxidoreductase, alpha subunit [EC:1.7.5.1 1.7.99.-]	ec:1.7.5.1	K00370	---	---	0	0	0	0	0	0	0	0	1	0	0	0	0	0	0	0	0	0	0	1	0	0	0	0	0	0	0	0	1	0	0	0	0	0	0
	1031	M00804	Complete nitrification, comammox, ammonia => nitrite => nitrate	map02020	Two-component system	Nitrogen metabolism	Nitrification, nitrite -> nitrate (nxrAB)	narG, narZ, nxrA; nitrate reductase / nitrite oxidoreductase, alpha subunit [EC:1.7.5.1 1.7.99.-]	narG, narZ, nxrA	nitrate reductase / nitrite oxidoreductase, alpha subunit [EC:1.7.5.1 1.7.99.-]	ec:1.7.5.1	K00370	---	---	0	0	0	0	0	0	0	0	1	0	0	0	0	0	0	0	0	0	0	1	0	0	0	0	0	0	0	0	1	0	0	0	0	0	0
	1032	M00793	dTDP-L-rhamnose biosynthesis	map00521	Streptomycin biosynthesis	---	---	---	rfbA, rmlA, rffH	glucose-1-phosphate thymidylyltransferase [EC:2.7.7.24]	ec:2.7.7.24	K00973	---	---	1	0	1	1	1	1	0	0	1	0	1	1	1	3	2	0	1	0	1	2	1	2	0	1	0	1	1	1	0	1	1	0	0	1	1
	1033	M00793	dTDP-L-rhamnose biosynthesis	map00523	Polyketide sugar unit biosynthesis	---	---	---	rfbA, rmlA, rffH	glucose-1-phosphate thymidylyltransferase [EC:2.7.7.24]	ec:2.7.7.24	K00973	---	---	1	0	1	1	1	1	0	0	1	0	1	1	1	3	2	0	1	0	1	2	1	2	0	1	0	1	1	1	0	1	1	0	0	1	1
	1034	M00793	dTDP-L-rhamnose biosynthesis	map00525	Acarbose and validamycin biosynthesis	---	---	---	rfbA, rmlA, rffH	glucose-1-phosphate thymidylyltransferase [EC:2.7.7.24]	ec:2.7.7.24	K00973	---	---	1	0	1	1	1	1	0	0	1	0	1	1	1	3	2	0	1	0	1	2	1	2	0	1	0	1	1	1	0	1	1	0	0	1	1
	1035	M00793	dTDP-L-rhamnose biosynthesis	map00541	O-Antigen nucleotide sugar biosynthesis	---	---	---	rfbA, rmlA, rffH	glucose-1-phosphate thymidylyltransferase [EC:2.7.7.24]	ec:2.7.7.24	K00973	---	---	1	0	1	1	1	1	0	0	1	0	1	1	1	3	2	0	1	0	1	2	1	2	0	1	0	1	1	1	0	1	1	0	0	1	1
	1036	M00793	dTDP-L-rhamnose biosynthesis	map01100	Metabolic pathways	---	---	---	rfbA, rmlA, rffH	glucose-1-phosphate thymidylyltransferase [EC:2.7.7.24]	ec:2.7.7.24	K00973	---	---	1	0	1	1	1	1	0	0	1	0	1	1	1	3	2	0	1	0	1	2	1	2	0	1	0	1	1	1	0	1	1	0	0	1	1
	1037	M00793	dTDP-L-rhamnose biosynthesis	map01110	Biosynthesis of secondary metabolites	---	---	---	rfbA, rmlA, rffH	glucose-1-phosphate thymidylyltransferase [EC:2.7.7.24]	ec:2.7.7.24	K00973	---	---	1	0	1	1	1	1	0	0	1	0	1	1	1	3	2	0	1	0	1	2	1	2	0	1	0	1	1	1	0	1	1	0	0	1	1
	1038	M00793	dTDP-L-rhamnose biosynthesis	map00521	Streptomycin biosynthesis	---	---	---	rfbD, rmlD	dTDP-4-dehydrorhamnose reductase [EC:1.1.1.133]	ec:1.1.1.133	K00067	---	---	1	0	0	1	1	2	1	0	1	1	1	1	1	3	1	0	1	0	1	1	1	2	0	1	0	1	1	1	0	1	0	0	0	1	1
	1039	M00793	dTDP-L-rhamnose biosynthesis	map00523	Polyketide sugar unit biosynthesis	---	---	---	rfbD, rmlD	dTDP-4-dehydrorhamnose reductase [EC:1.1.1.133]	ec:1.1.1.133	K00067	---	---	1	0	0	1	1	2	1	0	1	1	1	1	1	3	1	0	1	0	1	1	1	2	0	1	0	1	1	1	0	1	0	0	0	1	1
	1040	M00793	dTDP-L-rhamnose biosynthesis	map00541	O-Antigen nucleotide sugar biosynthesis	---	---	---	rfbD, rmlD	dTDP-4-dehydrorhamnose reductase [EC:1.1.1.133]	ec:1.1.1.133	K00067	---	---	1	0	0	1	1	2	1	0	1	1	1	1	1	3	1	0	1	0	1	1	1	2	0	1	0	1	1	1	0	1	0	0	0	1	1
	1041	M00793	dTDP-L-rhamnose biosynthesis	map01100	Metabolic pathways	---	---	---	rfbD, rmlD	dTDP-4-dehydrorhamnose reductase [EC:1.1.1.133]	ec:1.1.1.133	K00067	---	---	1	0	0	1	1	2	1	0	1	1	1	1	1	3	1	0	1	0	1	1	1	2	0	1	0	1	1	1	0	1	0	0	0	1	1
	1042	M00793	dTDP-L-rhamnose biosynthesis	map01110	Biosynthesis of secondary metabolites	---	---	---	rfbD, rmlD	dTDP-4-dehydrorhamnose reductase [EC:1.1.1.133]	ec:1.1.1.133	K00067	---	---	1	0	0	1	1	2	1	0	1	1	1	1	1	3	1	0	1	0	1	1	1	2	0	1	0	1	1	1	0	1	0	0	0	1	1
	1043	M00793	dTDP-L-rhamnose biosynthesis	map00521	Streptomycin biosynthesis	---	---	---	rfbB, rmlB, rffG	dTDP-glucose 4,6-dehydratase [EC:4.2.1.46]	ec:4.2.1.46	K01710	---	---	1	0	0	1	1	1	1	0	1	0	1	1	1	3	1	0	1	0	1	2	1	2	0	1	0	1	1	1	0	1	1	0	0	1	1
	1044	M00793	dTDP-L-rhamnose biosynthesis	map00523	Polyketide sugar unit biosynthesis	---	---	---	rfbB, rmlB, rffG	dTDP-glucose 4,6-dehydratase [EC:4.2.1.46]	ec:4.2.1.46	K01710	---	---	1	0	0	1	1	1	1	0	1	0	1	1	1	3	1	0	1	0	1	2	1	2	0	1	0	1	1	1	0	1	1	0	0	1	1
	1045	M00793	dTDP-L-rhamnose biosynthesis	map00525	Acarbose and validamycin biosynthesis	---	---	---	rfbB, rmlB, rffG	dTDP-glucose 4,6-dehydratase [EC:4.2.1.46]	ec:4.2.1.46	K01710	---	---	1	0	0	1	1	1	1	0	1	0	1	1	1	3	1	0	1	0	1	2	1	2	0	1	0	1	1	1	0	1	1	0	0	1	1
	1046	M00793	dTDP-L-rhamnose biosynthesis	map00541	O-Antigen nucleotide sugar biosynthesis	---	---	---	rfbB, rmlB, rffG	dTDP-glucose 4,6-dehydratase [EC:4.2.1.46]	ec:4.2.1.46	K01710	---	---	1	0	0	1	1	1	1	0	1	0	1	1	1	3	1	0	1	0	1	2	1	2	0	1	0	1	1	1	0	1	1	0	0	1	1
	1047	M00793	dTDP-L-rhamnose biosynthesis	map01055	Biosynthesis of vancomycin group antibiotics	---	---	---	rfbB, rmlB, rffG	dTDP-glucose 4,6-dehydratase [EC:4.2.1.46]	ec:4.2.1.46	K01710	---	---	1	0	0	1	1	1	1	0	1	0	1	1	1	3	1	0	1	0	1	2	1	2	0	1	0	1	1	1	0	1	1	0	0	1	1
	1048	M00793	dTDP-L-rhamnose biosynthesis	map01100	Metabolic pathways	---	---	---	rfbB, rmlB, rffG	dTDP-glucose 4,6-dehydratase [EC:4.2.1.46]	ec:4.2.1.46	K01710	---	---	1	0	0	1	1	1	1	0	1	0	1	1	1	3	1	0	1	0	1	2	1	2	0	1	0	1	1	1	0	1	1	0	0	1	1
	1049	M00793	dTDP-L-rhamnose biosynthesis	map01110	Biosynthesis of secondary metabolites	---	---	---	rfbB, rmlB, rffG	dTDP-glucose 4,6-dehydratase [EC:4.2.1.46]	ec:4.2.1.46	K01710	---	---	1	0	0	1	1	1	1	0	1	0	1	1	1	3	1	0	1	0	1	2	1	2	0	1	0	1	1	1	0	1	1	0	0	1	1
	1050	M00793	dTDP-L-rhamnose biosynthesis	map00521	Streptomycin biosynthesis	---	---	---	rfbC, rmlC	dTDP-4-dehydrorhamnose 3,5-epimerase [EC:5.1.3.13]	ec:5.1.3.13	K01790	---	---	1	0	0	1	1	1	1	0	1	1	1	2	1	4	1	0	1	0	1	1	1	3	0	1	0	1	0	1	0	1	0	0	0	2	2
	1051	M00793	dTDP-L-rhamnose biosynthesis	map00523	Polyketide sugar unit biosynthesis	---	---	---	rfbC, rmlC	dTDP-4-dehydrorhamnose 3,5-epimerase [EC:5.1.3.13]	ec:5.1.3.13	K01790	---	---	1	0	0	1	1	1	1	0	1	1	1	2	1	4	1	0	1	0	1	1	1	3	0	1	0	1	0	1	0	1	0	0	0	2	2
	1052	M00793	dTDP-L-rhamnose biosynthesis	map00541	O-Antigen nucleotide sugar biosynthesis	---	---	---	rfbC, rmlC	dTDP-4-dehydrorhamnose 3,5-epimerase [EC:5.1.3.13]	ec:5.1.3.13	K01790	---	---	1	0	0	1	1	1	1	0	1	1	1	2	1	4	1	0	1	0	1	1	1	3	0	1	0	1	0	1	0	1	0	0	0	2	2
	1053	M00793	dTDP-L-rhamnose biosynthesis	map01100	Metabolic pathways	---	---	---	rfbC, rmlC	dTDP-4-dehydrorhamnose 3,5-epimerase [EC:5.1.3.13]	ec:5.1.3.13	K01790	---	---	1	0	0	1	1	1	1	0	1	1	1	2	1	4	1	0	1	0	1	1	1	3	0	1	0	1	0	1	0	1	0	0	0	2	2
	1054	M00793	dTDP-L-rhamnose biosynthesis	map01110	Biosynthesis of secondary metabolites	---	---	---	rfbC, rmlC	dTDP-4-dehydrorhamnose 3,5-epimerase [EC:5.1.3.13]	ec:5.1.3.13	K01790	---	---	1	0	0	1	1	1	1	0	1	1	1	2	1	4	1	0	1	0	1	1	1	3	0	1	0	1	0	1	0	1	0	0	0	2	2
	1055	M00790	Pyrrolnitrin biosynthesis, tryptophan => pyrrolnitrin	map00404	Staurosporine biosynthesis	---	---	---	prnA, rebH, ktzQ	tryptophan 7-halogenase [EC:1.14.19.9]	ec:1.14.19.9	K14266	---	---	0	0	0	0	4	0	0	0	0	0	1	2	1	0	0	6	0	0	0	0	0	0	0	0	0	0	0	0	7	0	0	3	0	0	0
	1056	M00790	Pyrrolnitrin biosynthesis, tryptophan => pyrrolnitrin	map01100	Metabolic pathways	---	---	---	prnA, rebH, ktzQ	tryptophan 7-halogenase [EC:1.14.19.9]	ec:1.14.19.9	K14266	---	---	0	0	0	0	4	0	0	0	0	0	1	2	1	0	0	6	0	0	0	0	0	0	0	0	0	0	0	0	7	0	0	3	0	0	0
	1057	M00790	Pyrrolnitrin biosynthesis, tryptophan => pyrrolnitrin	map01110	Biosynthesis of secondary metabolites	---	---	---	prnA, rebH, ktzQ	tryptophan 7-halogenase [EC:1.14.19.9]	ec:1.14.19.9	K14266	---	---	0	0	0	0	4	0	0	0	0	0	1	2	1	0	0	6	0	0	0	0	0	0	0	0	0	0	0	0	7	0	0	3	0	0	0
	1058	M00790	Pyrrolnitrin biosynthesis, tryptophan => pyrrolnitrin	map00253	Tetracycline biosynthesis	---	---	---	ctcP, cts4, prnC	tetracycline 7-halogenase / FADH2 O2-dependent halogenase [EC:1.14.19.49 1.14.19.-]	ec:1.14.19.49	K14257	---	---	0	0	0	0	0	0	1	0	0	0	0	0	0	0	0	0	0	0	0	0	0	0	1	0	0	0	0	0	0	0	0	0	0	0	0
	1059	M00790	Pyrrolnitrin biosynthesis, tryptophan => pyrrolnitrin	map00404	Staurosporine biosynthesis	---	---	---	ctcP, cts4, prnC	tetracycline 7-halogenase / FADH2 O2-dependent halogenase [EC:1.14.19.49 1.14.19.-]	ec:1.14.19.49	K14257	---	---	0	0	0	0	0	0	1	0	0	0	0	0	0	0	0	0	0	0	0	0	0	0	1	0	0	0	0	0	0	0	0	0	0	0	0
	1060	M00790	Pyrrolnitrin biosynthesis, tryptophan => pyrrolnitrin	map01057	Biosynthesis of type II polyketide products	---	---	---	ctcP, cts4, prnC	tetracycline 7-halogenase / FADH2 O2-dependent halogenase [EC:1.14.19.49 1.14.19.-]	ec:1.14.19.49	K14257	---	---	0	0	0	0	0	0	1	0	0	0	0	0	0	0	0	0	0	0	0	0	0	0	1	0	0	0	0	0	0	0	0	0	0	0	0
	1061	M00790	Pyrrolnitrin biosynthesis, tryptophan => pyrrolnitrin	map01100	Metabolic pathways	---	---	---	ctcP, cts4, prnC	tetracycline 7-halogenase / FADH2 O2-dependent halogenase [EC:1.14.19.49 1.14.19.-]	ec:1.14.19.49	K14257	---	---	0	0	0	0	0	0	1	0	0	0	0	0	0	0	0	0	0	0	0	0	0	0	1	0	0	0	0	0	0	0	0	0	0	0	0
	1062	M00790	Pyrrolnitrin biosynthesis, tryptophan => pyrrolnitrin	map01110	Biosynthesis of secondary metabolites	---	---	---	ctcP, cts4, prnC	tetracycline 7-halogenase / FADH2 O2-dependent halogenase [EC:1.14.19.49 1.14.19.-]	ec:1.14.19.49	K14257	---	---	0	0	0	0	0	0	1	0	0	0	0	0	0	0	0	0	0	0	0	0	0	0	1	0	0	0	0	0	0	0	0	0	0	0	0
	1063	M00789	Rebeccamycin biosynthesis, tryptophan => rebeccamycin	map00404	Staurosporine biosynthesis	---	---	---	prnA, rebH, ktzQ	tryptophan 7-halogenase [EC:1.14.19.9]	ec:1.14.19.9	K14266	---	---	0	0	0	0	4	0	0	0	0	0	1	2	1	0	0	6	0	0	0	0	0	0	0	0	0	0	0	0	7	0	0	3	0	0	0
	1064	M00789	Rebeccamycin biosynthesis, tryptophan => rebeccamycin	map01100	Metabolic pathways	---	---	---	prnA, rebH, ktzQ	tryptophan 7-halogenase [EC:1.14.19.9]	ec:1.14.19.9	K14266	---	---	0	0	0	0	4	0	0	0	0	0	1	2	1	0	0	6	0	0	0	0	0	0	0	0	0	0	0	0	7	0	0	3	0	0	0
	1065	M00789	Rebeccamycin biosynthesis, tryptophan => rebeccamycin	map01110	Biosynthesis of secondary metabolites	---	---	---	prnA, rebH, ktzQ	tryptophan 7-halogenase [EC:1.14.19.9]	ec:1.14.19.9	K14266	---	---	0	0	0	0	4	0	0	0	0	0	1	2	1	0	0	6	0	0	0	0	0	0	0	0	0	0	0	0	7	0	0	3	0	0	0
	1066	M00787	Bacilysin biosynthesis, prephenate => bacilysin	map00998	Biosynthesis of various secondary metabolites - part 2	---	---	---	bacC	dihydroanticapsin dehydrogenase [EC:1.1.1.385]	ec:1.1.1.385	K19548	---	---	0	1	0	0	0	0	0	0	0	0	0	0	0	0	0	1	0	1	0	0	0	0	0	0	0	0	0	0	1	0	0	0	1	0	0
	1067	M00787	Bacilysin biosynthesis, prephenate => bacilysin	map01100	Metabolic pathways	---	---	---	bacC	dihydroanticapsin dehydrogenase [EC:1.1.1.385]	ec:1.1.1.385	K19548	---	---	0	1	0	0	0	0	0	0	0	0	0	0	0	0	0	1	0	1	0	0	0	0	0	0	0	0	0	0	1	0	0	0	1	0	0
	1068	M00787	Bacilysin biosynthesis, prephenate => bacilysin	map01110	Biosynthesis of secondary metabolites	---	---	---	bacC	dihydroanticapsin dehydrogenase [EC:1.1.1.385]	ec:1.1.1.385	K19548	---	---	0	1	0	0	0	0	0	0	0	0	0	0	0	0	0	1	0	1	0	0	0	0	0	0	0	0	0	0	1	0	0	0	1	0	0
	1069	M00778	Type II polyketide backbone biosynthesis, acyl-CoA + malonyl-CoA => polyketide	map01057	Biosynthesis of type II polyketide products	---	---	---	actIV	cyclase [EC:4.-.-.-]	---	K05555	---	---	0	0	0	2	1	1	1	1	0	0	1	1	1	2	2	1	0	0	0	0	1	2	1	2	0	1	1	0	1	1	1	1	0	2	2
	1070	M00778	Type II polyketide backbone biosynthesis, acyl-CoA + malonyl-CoA => polyketide	map01100	Metabolic pathways	---	---	---	actIV	cyclase [EC:4.-.-.-]	---	K05555	---	---	0	0	0	2	1	1	1	1	0	0	1	1	1	2	2	1	0	0	0	0	1	2	1	2	0	1	1	0	1	1	1	1	0	2	2
	1071	M00778	Type II polyketide backbone biosynthesis, acyl-CoA + malonyl-CoA => polyketide	map01110	Biosynthesis of secondary metabolites	---	---	---	actIV	cyclase [EC:4.-.-.-]	---	K05555	---	---	0	0	0	2	1	1	1	1	0	0	1	1	1	2	2	1	0	0	0	0	1	2	1	2	0	1	1	0	1	1	1	1	0	2	2
	1072	M00769	Multidrug resistance, efflux pump MexPQ-OpmE	---	---	---	---	---	cueR	MerR family transcriptional regulator, copper efflux regulator	---	K19591	---	---	1	0	0	1	0	0	0	1	1	0	0	0	0	1	1	0	1	0	0	0	1	1	0	1	0	0	0	0	0	1	0	0	0	1	1
	1073	M00745	Imipenem resistance, repression of porin OprD	---	---	---	---	---	mexT	LysR family transcriptional regulator, mexEF-oprN operon transcriptional activator	---	K18297	---	---	0	2	2	0	0	3	1	0	1	0	0	0	0	0	0	1	0	2	0	0	0	0	1	0	0	0	2	0	1	0	2	0	2	0	0
	1074	M00745	Imipenem resistance, repression of porin OprD	map02020	Two-component system	---	---	---	cusR, copR, silR	two-component system, OmpR family, copper resistance phosphate regulon response regulator CusR	---	K07665	---	---	0	1	0	0	0	0	0	0	2	0	0	0	0	0	0	0	0	1	0	2	0	0	0	0	0	0	1	0	1	0	0	0	1	0	0
	1075	M00745	Imipenem resistance, repression of porin OprD	map02020	Two-component system	---	---	---	cusS, copS, silS	two-component system, OmpR family, heavy metal sensor histidine kinase CusS [EC:2.7.13.3]	ec:2.7.13.3	K07644	---	---	0	0	0	0	0	0	0	0	2	0	0	0	0	0	0	0	0	0	0	2	0	0	0	0	0	0	1	0	1	0	0	0	0	0	0
	1076	M00744	Cationic antimicrobial peptide (CAMP) resistance, protease PgtE	map01503	Cationic antimicrobial peptide (CAMP) resistance	---	---	---	phoQ	two-component system, OmpR family, sensor histidine kinase PhoQ [EC:2.7.13.3]	ec:2.7.13.3	K07637	---	---	0	2	1	0	1	0	1	0	1	0	0	1	1	0	0	1	0	2	0	1	0	0	1	0	0	0	0	0	1	2	1	1	2	0	0
	1077	M00744	Cationic antimicrobial peptide (CAMP) resistance, protease PgtE	map02020	Two-component system	---	---	---	phoQ	two-component system, OmpR family, sensor histidine kinase PhoQ [EC:2.7.13.3]	ec:2.7.13.3	K07637	---	---	0	2	1	0	1	0	1	0	1	0	0	1	1	0	0	1	0	2	0	1	0	0	1	0	0	0	0	0	1	2	1	1	2	0	0
	1078	M00744	Cationic antimicrobial peptide (CAMP) resistance, protease PgtE	map01503	Cationic antimicrobial peptide (CAMP) resistance	---	---	---	phoP	two-component system, OmpR family, response regulator PhoP	---	K07660	---	---	0	0	0	0	0	0	0	0	0	0	0	0	0	0	0	1	0	0	0	0	0	0	0	0	0	0	0	0	1	0	0	1	0	0	0
	1079	M00744	Cationic antimicrobial peptide (CAMP) resistance, protease PgtE	map02020	Two-component system	---	---	---	phoP	two-component system, OmpR family, response regulator PhoP	---	K07660	---	---	0	0	0	0	0	0	0	0	0	0	0	0	0	0	0	1	0	0	0	0	0	0	0	0	0	0	0	0	1	0	0	1	0	0	0
	1080	M00741	Propanoyl-CoA metabolism, propanoyl-CoA => succinyl-CoA	map00280	Valine, leucine and isoleucine degradation	---	---	---	PCCA, pccA	propionyl-CoA carboxylase alpha chain [EC:6.4.1.3]	ec:6.4.1.3	K01965	---	---	1	0	0	1	1	0	0	0	0	0	0	1	1	1	1	0	1	0	0	0	1	1	0	1	1	0	0	0	0	1	0	0	0	1	1
	1081	M00741	Propanoyl-CoA metabolism, propanoyl-CoA => succinyl-CoA	map00630	Glyoxylate and dicarboxylate metabolism	---	---	---	PCCA, pccA	propionyl-CoA carboxylase alpha chain [EC:6.4.1.3]	ec:6.4.1.3	K01965	---	---	1	0	0	1	1	0	0	0	0	0	0	1	1	1	1	0	1	0	0	0	1	1	0	1	1	0	0	0	0	1	0	0	0	1	1
	1082	M00741	Propanoyl-CoA metabolism, propanoyl-CoA => succinyl-CoA	map00640	Propanoate metabolism	---	---	---	PCCA, pccA	propionyl-CoA carboxylase alpha chain [EC:6.4.1.3]	ec:6.4.1.3	K01965	---	---	1	0	0	1	1	0	0	0	0	0	0	1	1	1	1	0	1	0	0	0	1	1	0	1	1	0	0	0	0	1	0	0	0	1	1
	1083	M00741	Propanoyl-CoA metabolism, propanoyl-CoA => succinyl-CoA	map01100	Metabolic pathways	---	---	---	PCCA, pccA	propionyl-CoA carboxylase alpha chain [EC:6.4.1.3]	ec:6.4.1.3	K01965	---	---	1	0	0	1	1	0	0	0	0	0	0	1	1	1	1	0	1	0	0	0	1	1	0	1	1	0	0	0	0	1	0	0	0	1	1
	1084	M00741	Propanoyl-CoA metabolism, propanoyl-CoA => succinyl-CoA	map01110	Biosynthesis of secondary metabolites	---	---	---	PCCA, pccA	propionyl-CoA carboxylase alpha chain [EC:6.4.1.3]	ec:6.4.1.3	K01965	---	---	1	0	0	1	1	0	0	0	0	0	0	1	1	1	1	0	1	0	0	0	1	1	0	1	1	0	0	0	0	1	0	0	0	1	1
	1085	M00741	Propanoyl-CoA metabolism, propanoyl-CoA => succinyl-CoA	map01120	Microbial metabolism in diverse environments	---	---	---	PCCA, pccA	propionyl-CoA carboxylase alpha chain [EC:6.4.1.3]	ec:6.4.1.3	K01965	---	---	1	0	0	1	1	0	0	0	0	0	0	1	1	1	1	0	1	0	0	0	1	1	0	1	1	0	0	0	0	1	0	0	0	1	1
	1086	M00741	Propanoyl-CoA metabolism, propanoyl-CoA => succinyl-CoA	map01200	Carbon metabolism	---	---	---	PCCA, pccA	propionyl-CoA carboxylase alpha chain [EC:6.4.1.3]	ec:6.4.1.3	K01965	---	---	1	0	0	1	1	0	0	0	0	0	0	1	1	1	1	0	1	0	0	0	1	1	0	1	1	0	0	0	0	1	0	0	0	1	1
	1087	M00741	Propanoyl-CoA metabolism, propanoyl-CoA => succinyl-CoA	map00280	Valine, leucine and isoleucine degradation	Carbon fixation	3-hydroxypropionate bicycle	MUT; methylmalonyl-CoA mutase [EC:5.4.99.2]	MUT	methylmalonyl-CoA mutase [EC:5.4.99.2]	ec:5.4.99.2	K01847	---	---	1	0	0	1	1	0	0	1	0	1	0	1	1	1	1	0	1	0	1	0	1	1	0	1	1	1	0	1	0	1	0	0	0	1	1
	1088	M00741	Propanoyl-CoA metabolism, propanoyl-CoA => succinyl-CoA	map00630	Glyoxylate and dicarboxylate metabolism	Carbon fixation	3-hydroxypropionate bicycle	MUT; methylmalonyl-CoA mutase [EC:5.4.99.2]	MUT	methylmalonyl-CoA mutase [EC:5.4.99.2]	ec:5.4.99.2	K01847	---	---	1	0	0	1	1	0	0	1	0	1	0	1	1	1	1	0	1	0	1	0	1	1	0	1	1	1	0	1	0	1	0	0	0	1	1
	1089	M00741	Propanoyl-CoA metabolism, propanoyl-CoA => succinyl-CoA	map00640	Propanoate metabolism	Carbon fixation	3-hydroxypropionate bicycle	MUT; methylmalonyl-CoA mutase [EC:5.4.99.2]	MUT	methylmalonyl-CoA mutase [EC:5.4.99.2]	ec:5.4.99.2	K01847	---	---	1	0	0	1	1	0	0	1	0	1	0	1	1	1	1	0	1	0	1	0	1	1	0	1	1	1	0	1	0	1	0	0	0	1	1
	1090	M00741	Propanoyl-CoA metabolism, propanoyl-CoA => succinyl-CoA	map00720	Carbon fixation pathways in prokaryotes	Carbon fixation	3-hydroxypropionate bicycle	MUT; methylmalonyl-CoA mutase [EC:5.4.99.2]	MUT	methylmalonyl-CoA mutase [EC:5.4.99.2]	ec:5.4.99.2	K01847	---	---	1	0	0	1	1	0	0	1	0	1	0	1	1	1	1	0	1	0	1	0	1	1	0	1	1	1	0	1	0	1	0	0	0	1	1
	1091	M00741	Propanoyl-CoA metabolism, propanoyl-CoA => succinyl-CoA	map01100	Metabolic pathways	Carbon fixation	3-hydroxypropionate bicycle	MUT; methylmalonyl-CoA mutase [EC:5.4.99.2]	MUT	methylmalonyl-CoA mutase [EC:5.4.99.2]	ec:5.4.99.2	K01847	---	---	1	0	0	1	1	0	0	1	0	1	0	1	1	1	1	0	1	0	1	0	1	1	0	1	1	1	0	1	0	1	0	0	0	1	1
	1092	M00741	Propanoyl-CoA metabolism, propanoyl-CoA => succinyl-CoA	map01120	Microbial metabolism in diverse environments	Carbon fixation	3-hydroxypropionate bicycle	MUT; methylmalonyl-CoA mutase [EC:5.4.99.2]	MUT	methylmalonyl-CoA mutase [EC:5.4.99.2]	ec:5.4.99.2	K01847	---	---	1	0	0	1	1	0	0	1	0	1	0	1	1	1	1	0	1	0	1	0	1	1	0	1	1	1	0	1	0	1	0	0	0	1	1
	1093	M00741	Propanoyl-CoA metabolism, propanoyl-CoA => succinyl-CoA	map01200	Carbon metabolism	Carbon fixation	3-hydroxypropionate bicycle	MUT; methylmalonyl-CoA mutase [EC:5.4.99.2]	MUT	methylmalonyl-CoA mutase [EC:5.4.99.2]	ec:5.4.99.2	K01847	---	---	1	0	0	1	1	0	0	1	0	1	0	1	1	1	1	0	1	0	1	0	1	1	0	1	1	1	0	1	0	1	0	0	0	1	1
	1094	M00741	Propanoyl-CoA metabolism, propanoyl-CoA => succinyl-CoA	map00280	Valine, leucine and isoleucine degradation	---	---	---	PCCB, pccB	propionyl-CoA carboxylase beta chain [EC:6.4.1.3 2.1.3.15]	ec:6.4.1.3	K01966	---	---	1	0	0	1	1	0	0	1	0	1	0	0	1	1	1	0	1	0	1	0	1	1	0	1	0	0	0	1	0	1	0	0	0	1	1
	1095	M00741	Propanoyl-CoA metabolism, propanoyl-CoA => succinyl-CoA	map00280	Valine, leucine and isoleucine degradation	---	---	---	PCCB, pccB	propionyl-CoA carboxylase beta chain [EC:6.4.1.3 2.1.3.15]	ec:2.1.3.15	K01966	---	---	1	0	0	1	1	0	0	1	0	1	0	0	1	1	1	0	1	0	1	0	1	1	0	1	0	0	0	1	0	1	0	0	0	1	1
	1096	M00741	Propanoyl-CoA metabolism, propanoyl-CoA => succinyl-CoA	map00630	Glyoxylate and dicarboxylate metabolism	---	---	---	PCCB, pccB	propionyl-CoA carboxylase beta chain [EC:6.4.1.3 2.1.3.15]	ec:6.4.1.3	K01966	---	---	1	0	0	1	1	0	0	1	0	1	0	0	1	1	1	0	1	0	1	0	1	1	0	1	0	0	0	1	0	1	0	0	0	1	1
	1097	M00741	Propanoyl-CoA metabolism, propanoyl-CoA => succinyl-CoA	map00630	Glyoxylate and dicarboxylate metabolism	---	---	---	PCCB, pccB	propionyl-CoA carboxylase beta chain [EC:6.4.1.3 2.1.3.15]	ec:2.1.3.15	K01966	---	---	1	0	0	1	1	0	0	1	0	1	0	0	1	1	1	0	1	0	1	0	1	1	0	1	0	0	0	1	0	1	0	0	0	1	1
	1098	M00741	Propanoyl-CoA metabolism, propanoyl-CoA => succinyl-CoA	map00640	Propanoate metabolism	---	---	---	PCCB, pccB	propionyl-CoA carboxylase beta chain [EC:6.4.1.3 2.1.3.15]	ec:6.4.1.3	K01966	---	---	1	0	0	1	1	0	0	1	0	1	0	0	1	1	1	0	1	0	1	0	1	1	0	1	0	0	0	1	0	1	0	0	0	1	1
	1099	M00741	Propanoyl-CoA metabolism, propanoyl-CoA => succinyl-CoA	map00640	Propanoate metabolism	---	---	---	PCCB, pccB	propionyl-CoA carboxylase beta chain [EC:6.4.1.3 2.1.3.15]	ec:2.1.3.15	K01966	---	---	1	0	0	1	1	0	0	1	0	1	0	0	1	1	1	0	1	0	1	0	1	1	0	1	0	0	0	1	0	1	0	0	0	1	1
	1100	M00741	Propanoyl-CoA metabolism, propanoyl-CoA => succinyl-CoA	map01100	Metabolic pathways	---	---	---	PCCB, pccB	propionyl-CoA carboxylase beta chain [EC:6.4.1.3 2.1.3.15]	ec:6.4.1.3	K01966	---	---	1	0	0	1	1	0	0	1	0	1	0	0	1	1	1	0	1	0	1	0	1	1	0	1	0	0	0	1	0	1	0	0	0	1	1
	1101	M00741	Propanoyl-CoA metabolism, propanoyl-CoA => succinyl-CoA	map01100	Metabolic pathways	---	---	---	PCCB, pccB	propionyl-CoA carboxylase beta chain [EC:6.4.1.3 2.1.3.15]	ec:2.1.3.15	K01966	---	---	1	0	0	1	1	0	0	1	0	1	0	0	1	1	1	0	1	0	1	0	1	1	0	1	0	0	0	1	0	1	0	0	0	1	1
	1102	M00741	Propanoyl-CoA metabolism, propanoyl-CoA => succinyl-CoA	map01110	Biosynthesis of secondary metabolites	---	---	---	PCCB, pccB	propionyl-CoA carboxylase beta chain [EC:6.4.1.3 2.1.3.15]	ec:6.4.1.3	K01966	---	---	1	0	0	1	1	0	0	1	0	1	0	0	1	1	1	0	1	0	1	0	1	1	0	1	0	0	0	1	0	1	0	0	0	1	1
	1103	M00741	Propanoyl-CoA metabolism, propanoyl-CoA => succinyl-CoA	map01110	Biosynthesis of secondary metabolites	---	---	---	PCCB, pccB	propionyl-CoA carboxylase beta chain [EC:6.4.1.3 2.1.3.15]	ec:2.1.3.15	K01966	---	---	1	0	0	1	1	0	0	1	0	1	0	0	1	1	1	0	1	0	1	0	1	1	0	1	0	0	0	1	0	1	0	0	0	1	1
	1104	M00741	Propanoyl-CoA metabolism, propanoyl-CoA => succinyl-CoA	map01120	Microbial metabolism in diverse environments	---	---	---	PCCB, pccB	propionyl-CoA carboxylase beta chain [EC:6.4.1.3 2.1.3.15]	ec:6.4.1.3	K01966	---	---	1	0	0	1	1	0	0	1	0	1	0	0	1	1	1	0	1	0	1	0	1	1	0	1	0	0	0	1	0	1	0	0	0	1	1
	1105	M00741	Propanoyl-CoA metabolism, propanoyl-CoA => succinyl-CoA	map01120	Microbial metabolism in diverse environments	---	---	---	PCCB, pccB	propionyl-CoA carboxylase beta chain [EC:6.4.1.3 2.1.3.15]	ec:2.1.3.15	K01966	---	---	1	0	0	1	1	0	0	1	0	1	0	0	1	1	1	0	1	0	1	0	1	1	0	1	0	0	0	1	0	1	0	0	0	1	1
	1106	M00741	Propanoyl-CoA metabolism, propanoyl-CoA => succinyl-CoA	map01200	Carbon metabolism	---	---	---	PCCB, pccB	propionyl-CoA carboxylase beta chain [EC:6.4.1.3 2.1.3.15]	ec:6.4.1.3	K01966	---	---	1	0	0	1	1	0	0	1	0	1	0	0	1	1	1	0	1	0	1	0	1	1	0	1	0	0	0	1	0	1	0	0	0	1	1
	1107	M00741	Propanoyl-CoA metabolism, propanoyl-CoA => succinyl-CoA	map01200	Carbon metabolism	---	---	---	PCCB, pccB	propionyl-CoA carboxylase beta chain [EC:6.4.1.3 2.1.3.15]	ec:2.1.3.15	K01966	---	---	1	0	0	1	1	0	0	1	0	1	0	0	1	1	1	0	1	0	1	0	1	1	0	1	0	0	0	1	0	1	0	0	0	1	1
	1108	M00741	Propanoyl-CoA metabolism, propanoyl-CoA => succinyl-CoA	map00280	Valine, leucine and isoleucine degradation	Carbon fixation	3-hydroxypropionate bicycle	MCEE, epi; methylmalonyl-CoA/ethylmalonyl-CoA epimerase [EC:5.1.99.1]	MCEE, epi	methylmalonyl-CoA/ethylmalonyl-CoA epimerase [EC:5.1.99.1]	ec:5.1.99.1	K05606	---	---	1	0	0	1	1	0	0	1	0	1	0	1	0	1	1	0	1	0	1	0	1	1	0	1	1	1	0	1	0	1	0	0	0	1	1
	1109	M00741	Propanoyl-CoA metabolism, propanoyl-CoA => succinyl-CoA	map00280	Valine, leucine and isoleucine degradation	Carbon fixation	Hydroxypropionate-hydroxybutylate cycle	MCEE, epi; methylmalonyl-CoA/ethylmalonyl-CoA epimerase [EC:5.1.99.1]	MCEE, epi	methylmalonyl-CoA/ethylmalonyl-CoA epimerase [EC:5.1.99.1]	ec:5.1.99.1	K05606	---	---	1	0	0	1	1	0	0	1	0	1	0	1	0	1	1	0	1	0	1	0	1	1	0	1	1	1	0	1	0	1	0	0	0	1	1
	1110	M00741	Propanoyl-CoA metabolism, propanoyl-CoA => succinyl-CoA	map00630	Glyoxylate and dicarboxylate metabolism	Carbon fixation	3-hydroxypropionate bicycle	MCEE, epi; methylmalonyl-CoA/ethylmalonyl-CoA epimerase [EC:5.1.99.1]	MCEE, epi	methylmalonyl-CoA/ethylmalonyl-CoA epimerase [EC:5.1.99.1]	ec:5.1.99.1	K05606	---	---	1	0	0	1	1	0	0	1	0	1	0	1	0	1	1	0	1	0	1	0	1	1	0	1	1	1	0	1	0	1	0	0	0	1	1
	1111	M00741	Propanoyl-CoA metabolism, propanoyl-CoA => succinyl-CoA	map00630	Glyoxylate and dicarboxylate metabolism	Carbon fixation	Hydroxypropionate-hydroxybutylate cycle	MCEE, epi; methylmalonyl-CoA/ethylmalonyl-CoA epimerase [EC:5.1.99.1]	MCEE, epi	methylmalonyl-CoA/ethylmalonyl-CoA epimerase [EC:5.1.99.1]	ec:5.1.99.1	K05606	---	---	1	0	0	1	1	0	0	1	0	1	0	1	0	1	1	0	1	0	1	0	1	1	0	1	1	1	0	1	0	1	0	0	0	1	1
	1112	M00741	Propanoyl-CoA metabolism, propanoyl-CoA => succinyl-CoA	map00640	Propanoate metabolism	Carbon fixation	3-hydroxypropionate bicycle	MCEE, epi; methylmalonyl-CoA/ethylmalonyl-CoA epimerase [EC:5.1.99.1]	MCEE, epi	methylmalonyl-CoA/ethylmalonyl-CoA epimerase [EC:5.1.99.1]	ec:5.1.99.1	K05606	---	---	1	0	0	1	1	0	0	1	0	1	0	1	0	1	1	0	1	0	1	0	1	1	0	1	1	1	0	1	0	1	0	0	0	1	1
	1113	M00741	Propanoyl-CoA metabolism, propanoyl-CoA => succinyl-CoA	map00640	Propanoate metabolism	Carbon fixation	Hydroxypropionate-hydroxybutylate cycle	MCEE, epi; methylmalonyl-CoA/ethylmalonyl-CoA epimerase [EC:5.1.99.1]	MCEE, epi	methylmalonyl-CoA/ethylmalonyl-CoA epimerase [EC:5.1.99.1]	ec:5.1.99.1	K05606	---	---	1	0	0	1	1	0	0	1	0	1	0	1	0	1	1	0	1	0	1	0	1	1	0	1	1	1	0	1	0	1	0	0	0	1	1
	1114	M00741	Propanoyl-CoA metabolism, propanoyl-CoA => succinyl-CoA	map00720	Carbon fixation pathways in prokaryotes	Carbon fixation	3-hydroxypropionate bicycle	MCEE, epi; methylmalonyl-CoA/ethylmalonyl-CoA epimerase [EC:5.1.99.1]	MCEE, epi	methylmalonyl-CoA/ethylmalonyl-CoA epimerase [EC:5.1.99.1]	ec:5.1.99.1	K05606	---	---	1	0	0	1	1	0	0	1	0	1	0	1	0	1	1	0	1	0	1	0	1	1	0	1	1	1	0	1	0	1	0	0	0	1	1
	1115	M00741	Propanoyl-CoA metabolism, propanoyl-CoA => succinyl-CoA	map00720	Carbon fixation pathways in prokaryotes	Carbon fixation	Hydroxypropionate-hydroxybutylate cycle	MCEE, epi; methylmalonyl-CoA/ethylmalonyl-CoA epimerase [EC:5.1.99.1]	MCEE, epi	methylmalonyl-CoA/ethylmalonyl-CoA epimerase [EC:5.1.99.1]	ec:5.1.99.1	K05606	---	---	1	0	0	1	1	0	0	1	0	1	0	1	0	1	1	0	1	0	1	0	1	1	0	1	1	1	0	1	0	1	0	0	0	1	1
	1116	M00741	Propanoyl-CoA metabolism, propanoyl-CoA => succinyl-CoA	map01100	Metabolic pathways	Carbon fixation	3-hydroxypropionate bicycle	MCEE, epi; methylmalonyl-CoA/ethylmalonyl-CoA epimerase [EC:5.1.99.1]	MCEE, epi	methylmalonyl-CoA/ethylmalonyl-CoA epimerase [EC:5.1.99.1]	ec:5.1.99.1	K05606	---	---	1	0	0	1	1	0	0	1	0	1	0	1	0	1	1	0	1	0	1	0	1	1	0	1	1	1	0	1	0	1	0	0	0	1	1
	1117	M00741	Propanoyl-CoA metabolism, propanoyl-CoA => succinyl-CoA	map01100	Metabolic pathways	Carbon fixation	Hydroxypropionate-hydroxybutylate cycle	MCEE, epi; methylmalonyl-CoA/ethylmalonyl-CoA epimerase [EC:5.1.99.1]	MCEE, epi	methylmalonyl-CoA/ethylmalonyl-CoA epimerase [EC:5.1.99.1]	ec:5.1.99.1	K05606	---	---	1	0	0	1	1	0	0	1	0	1	0	1	0	1	1	0	1	0	1	0	1	1	0	1	1	1	0	1	0	1	0	0	0	1	1
	1118	M00741	Propanoyl-CoA metabolism, propanoyl-CoA => succinyl-CoA	map01120	Microbial metabolism in diverse environments	Carbon fixation	3-hydroxypropionate bicycle	MCEE, epi; methylmalonyl-CoA/ethylmalonyl-CoA epimerase [EC:5.1.99.1]	MCEE, epi	methylmalonyl-CoA/ethylmalonyl-CoA epimerase [EC:5.1.99.1]	ec:5.1.99.1	K05606	---	---	1	0	0	1	1	0	0	1	0	1	0	1	0	1	1	0	1	0	1	0	1	1	0	1	1	1	0	1	0	1	0	0	0	1	1
	1119	M00741	Propanoyl-CoA metabolism, propanoyl-CoA => succinyl-CoA	map01120	Microbial metabolism in diverse environments	Carbon fixation	Hydroxypropionate-hydroxybutylate cycle	MCEE, epi; methylmalonyl-CoA/ethylmalonyl-CoA epimerase [EC:5.1.99.1]	MCEE, epi	methylmalonyl-CoA/ethylmalonyl-CoA epimerase [EC:5.1.99.1]	ec:5.1.99.1	K05606	---	---	1	0	0	1	1	0	0	1	0	1	0	1	0	1	1	0	1	0	1	0	1	1	0	1	1	1	0	1	0	1	0	0	0	1	1
	1120	M00741	Propanoyl-CoA metabolism, propanoyl-CoA => succinyl-CoA	map01200	Carbon metabolism	Carbon fixation	3-hydroxypropionate bicycle	MCEE, epi; methylmalonyl-CoA/ethylmalonyl-CoA epimerase [EC:5.1.99.1]	MCEE, epi	methylmalonyl-CoA/ethylmalonyl-CoA epimerase [EC:5.1.99.1]	ec:5.1.99.1	K05606	---	---	1	0	0	1	1	0	0	1	0	1	0	1	0	1	1	0	1	0	1	0	1	1	0	1	1	1	0	1	0	1	0	0	0	1	1
	1121	M00741	Propanoyl-CoA metabolism, propanoyl-CoA => succinyl-CoA	map01200	Carbon metabolism	Carbon fixation	Hydroxypropionate-hydroxybutylate cycle	MCEE, epi; methylmalonyl-CoA/ethylmalonyl-CoA epimerase [EC:5.1.99.1]	MCEE, epi	methylmalonyl-CoA/ethylmalonyl-CoA epimerase [EC:5.1.99.1]	ec:5.1.99.1	K05606	---	---	1	0	0	1	1	0	0	1	0	1	0	1	0	1	1	0	1	0	1	0	1	1	0	1	1	1	0	1	0	1	0	0	0	1	1
	1122	M00741	Propanoyl-CoA metabolism, propanoyl-CoA => succinyl-CoA	map00280	Valine, leucine and isoleucine degradation	Carbon fixation	3-hydroxypropionate bicycle	E5.4.99.2B, mcmA2; methylmalonyl-CoA mutase, C-terminal domain [EC:5.4.99.2]	E5.4.99.2B, mcmA2	methylmalonyl-CoA mutase, C-terminal domain [EC:5.4.99.2]	ec:5.4.99.2	K01849	---	---	0	1	0	0	0	0	0	0	0	0	0	0	0	0	0	0	0	1	0	0	0	0	0	0	0	0	0	0	0	0	0	0	1	0	0
	1123	M00741	Propanoyl-CoA metabolism, propanoyl-CoA => succinyl-CoA	map00280	Valine, leucine and isoleucine degradation	Carbon fixation	Hydroxypropionate-hydroxybutylate cycle	E5.4.99.2B, mcmA2; methylmalonyl-CoA mutase, C-terminal domain [EC:5.4.99.2]	E5.4.99.2B, mcmA2	methylmalonyl-CoA mutase, C-terminal domain [EC:5.4.99.2]	ec:5.4.99.2	K01849	---	---	0	1	0	0	0	0	0	0	0	0	0	0	0	0	0	0	0	1	0	0	0	0	0	0	0	0	0	0	0	0	0	0	1	0	0
	1124	M00741	Propanoyl-CoA metabolism, propanoyl-CoA => succinyl-CoA	map00630	Glyoxylate and dicarboxylate metabolism	Carbon fixation	3-hydroxypropionate bicycle	E5.4.99.2B, mcmA2; methylmalonyl-CoA mutase, C-terminal domain [EC:5.4.99.2]	E5.4.99.2B, mcmA2	methylmalonyl-CoA mutase, C-terminal domain [EC:5.4.99.2]	ec:5.4.99.2	K01849	---	---	0	1	0	0	0	0	0	0	0	0	0	0	0	0	0	0	0	1	0	0	0	0	0	0	0	0	0	0	0	0	0	0	1	0	0
	1125	M00741	Propanoyl-CoA metabolism, propanoyl-CoA => succinyl-CoA	map00630	Glyoxylate and dicarboxylate metabolism	Carbon fixation	Hydroxypropionate-hydroxybutylate cycle	E5.4.99.2B, mcmA2; methylmalonyl-CoA mutase, C-terminal domain [EC:5.4.99.2]	E5.4.99.2B, mcmA2	methylmalonyl-CoA mutase, C-terminal domain [EC:5.4.99.2]	ec:5.4.99.2	K01849	---	---	0	1	0	0	0	0	0	0	0	0	0	0	0	0	0	0	0	1	0	0	0	0	0	0	0	0	0	0	0	0	0	0	1	0	0
	1126	M00741	Propanoyl-CoA metabolism, propanoyl-CoA => succinyl-CoA	map00640	Propanoate metabolism	Carbon fixation	3-hydroxypropionate bicycle	E5.4.99.2B, mcmA2; methylmalonyl-CoA mutase, C-terminal domain [EC:5.4.99.2]	E5.4.99.2B, mcmA2	methylmalonyl-CoA mutase, C-terminal domain [EC:5.4.99.2]	ec:5.4.99.2	K01849	---	---	0	1	0	0	0	0	0	0	0	0	0	0	0	0	0	0	0	1	0	0	0	0	0	0	0	0	0	0	0	0	0	0	1	0	0
	1127	M00741	Propanoyl-CoA metabolism, propanoyl-CoA => succinyl-CoA	map00640	Propanoate metabolism	Carbon fixation	Hydroxypropionate-hydroxybutylate cycle	E5.4.99.2B, mcmA2; methylmalonyl-CoA mutase, C-terminal domain [EC:5.4.99.2]	E5.4.99.2B, mcmA2	methylmalonyl-CoA mutase, C-terminal domain [EC:5.4.99.2]	ec:5.4.99.2	K01849	---	---	0	1	0	0	0	0	0	0	0	0	0	0	0	0	0	0	0	1	0	0	0	0	0	0	0	0	0	0	0	0	0	0	1	0	0
	1128	M00741	Propanoyl-CoA metabolism, propanoyl-CoA => succinyl-CoA	map00720	Carbon fixation pathways in prokaryotes	Carbon fixation	3-hydroxypropionate bicycle	E5.4.99.2B, mcmA2; methylmalonyl-CoA mutase, C-terminal domain [EC:5.4.99.2]	E5.4.99.2B, mcmA2	methylmalonyl-CoA mutase, C-terminal domain [EC:5.4.99.2]	ec:5.4.99.2	K01849	---	---	0	1	0	0	0	0	0	0	0	0	0	0	0	0	0	0	0	1	0	0	0	0	0	0	0	0	0	0	0	0	0	0	1	0	0
	1129	M00741	Propanoyl-CoA metabolism, propanoyl-CoA => succinyl-CoA	map00720	Carbon fixation pathways in prokaryotes	Carbon fixation	Hydroxypropionate-hydroxybutylate cycle	E5.4.99.2B, mcmA2; methylmalonyl-CoA mutase, C-terminal domain [EC:5.4.99.2]	E5.4.99.2B, mcmA2	methylmalonyl-CoA mutase, C-terminal domain [EC:5.4.99.2]	ec:5.4.99.2	K01849	---	---	0	1	0	0	0	0	0	0	0	0	0	0	0	0	0	0	0	1	0	0	0	0	0	0	0	0	0	0	0	0	0	0	1	0	0
	1130	M00741	Propanoyl-CoA metabolism, propanoyl-CoA => succinyl-CoA	map01100	Metabolic pathways	Carbon fixation	3-hydroxypropionate bicycle	E5.4.99.2B, mcmA2; methylmalonyl-CoA mutase, C-terminal domain [EC:5.4.99.2]	E5.4.99.2B, mcmA2	methylmalonyl-CoA mutase, C-terminal domain [EC:5.4.99.2]	ec:5.4.99.2	K01849	---	---	0	1	0	0	0	0	0	0	0	0	0	0	0	0	0	0	0	1	0	0	0	0	0	0	0	0	0	0	0	0	0	0	1	0	0
	1131	M00741	Propanoyl-CoA metabolism, propanoyl-CoA => succinyl-CoA	map01100	Metabolic pathways	Carbon fixation	Hydroxypropionate-hydroxybutylate cycle	E5.4.99.2B, mcmA2; methylmalonyl-CoA mutase, C-terminal domain [EC:5.4.99.2]	E5.4.99.2B, mcmA2	methylmalonyl-CoA mutase, C-terminal domain [EC:5.4.99.2]	ec:5.4.99.2	K01849	---	---	0	1	0	0	0	0	0	0	0	0	0	0	0	0	0	0	0	1	0	0	0	0	0	0	0	0	0	0	0	0	0	0	1	0	0
	1132	M00741	Propanoyl-CoA metabolism, propanoyl-CoA => succinyl-CoA	map01120	Microbial metabolism in diverse environments	Carbon fixation	3-hydroxypropionate bicycle	E5.4.99.2B, mcmA2; methylmalonyl-CoA mutase, C-terminal domain [EC:5.4.99.2]	E5.4.99.2B, mcmA2	methylmalonyl-CoA mutase, C-terminal domain [EC:5.4.99.2]	ec:5.4.99.2	K01849	---	---	0	1	0	0	0	0	0	0	0	0	0	0	0	0	0	0	0	1	0	0	0	0	0	0	0	0	0	0	0	0	0	0	1	0	0
	1133	M00741	Propanoyl-CoA metabolism, propanoyl-CoA => succinyl-CoA	map01120	Microbial metabolism in diverse environments	Carbon fixation	Hydroxypropionate-hydroxybutylate cycle	E5.4.99.2B, mcmA2; methylmalonyl-CoA mutase, C-terminal domain [EC:5.4.99.2]	E5.4.99.2B, mcmA2	methylmalonyl-CoA mutase, C-terminal domain [EC:5.4.99.2]	ec:5.4.99.2	K01849	---	---	0	1	0	0	0	0	0	0	0	0	0	0	0	0	0	0	0	1	0	0	0	0	0	0	0	0	0	0	0	0	0	0	1	0	0
	1134	M00741	Propanoyl-CoA metabolism, propanoyl-CoA => succinyl-CoA	map01200	Carbon metabolism	Carbon fixation	3-hydroxypropionate bicycle	E5.4.99.2B, mcmA2; methylmalonyl-CoA mutase, C-terminal domain [EC:5.4.99.2]	E5.4.99.2B, mcmA2	methylmalonyl-CoA mutase, C-terminal domain [EC:5.4.99.2]	ec:5.4.99.2	K01849	---	---	0	1	0	0	0	0	0	0	0	0	0	0	0	0	0	0	0	1	0	0	0	0	0	0	0	0	0	0	0	0	0	0	1	0	0
	1135	M00741	Propanoyl-CoA metabolism, propanoyl-CoA => succinyl-CoA	map01200	Carbon metabolism	Carbon fixation	Hydroxypropionate-hydroxybutylate cycle	E5.4.99.2B, mcmA2; methylmalonyl-CoA mutase, C-terminal domain [EC:5.4.99.2]	E5.4.99.2B, mcmA2	methylmalonyl-CoA mutase, C-terminal domain [EC:5.4.99.2]	ec:5.4.99.2	K01849	---	---	0	1	0	0	0	0	0	0	0	0	0	0	0	0	0	0	0	1	0	0	0	0	0	0	0	0	0	0	0	0	0	0	1	0	0
	1136	M00741	Propanoyl-CoA metabolism, propanoyl-CoA => succinyl-CoA	map00280	Valine, leucine and isoleucine degradation	Carbon fixation	3-hydroxypropionate bicycle	E5.4.99.2A, mcmA1; methylmalonyl-CoA mutase, N-terminal domain [EC:5.4.99.2]	E5.4.99.2A, mcmA1	methylmalonyl-CoA mutase, N-terminal domain [EC:5.4.99.2]	ec:5.4.99.2	K01848	---	---	0	1	0	0	0	0	0	0	0	0	0	0	0	0	0	0	0	1	0	0	0	0	0	0	0	0	0	0	0	0	0	0	1	0	0
	1137	M00741	Propanoyl-CoA metabolism, propanoyl-CoA => succinyl-CoA	map00280	Valine, leucine and isoleucine degradation	Carbon fixation	Hydroxypropionate-hydroxybutylate cycle	E5.4.99.2A, mcmA1; methylmalonyl-CoA mutase, N-terminal domain [EC:5.4.99.2]	E5.4.99.2A, mcmA1	methylmalonyl-CoA mutase, N-terminal domain [EC:5.4.99.2]	ec:5.4.99.2	K01848	---	---	0	1	0	0	0	0	0	0	0	0	0	0	0	0	0	0	0	1	0	0	0	0	0	0	0	0	0	0	0	0	0	0	1	0	0
	1138	M00741	Propanoyl-CoA metabolism, propanoyl-CoA => succinyl-CoA	map00630	Glyoxylate and dicarboxylate metabolism	Carbon fixation	3-hydroxypropionate bicycle	E5.4.99.2A, mcmA1; methylmalonyl-CoA mutase, N-terminal domain [EC:5.4.99.2]	E5.4.99.2A, mcmA1	methylmalonyl-CoA mutase, N-terminal domain [EC:5.4.99.2]	ec:5.4.99.2	K01848	---	---	0	1	0	0	0	0	0	0	0	0	0	0	0	0	0	0	0	1	0	0	0	0	0	0	0	0	0	0	0	0	0	0	1	0	0
	1139	M00741	Propanoyl-CoA metabolism, propanoyl-CoA => succinyl-CoA	map00630	Glyoxylate and dicarboxylate metabolism	Carbon fixation	Hydroxypropionate-hydroxybutylate cycle	E5.4.99.2A, mcmA1; methylmalonyl-CoA mutase, N-terminal domain [EC:5.4.99.2]	E5.4.99.2A, mcmA1	methylmalonyl-CoA mutase, N-terminal domain [EC:5.4.99.2]	ec:5.4.99.2	K01848	---	---	0	1	0	0	0	0	0	0	0	0	0	0	0	0	0	0	0	1	0	0	0	0	0	0	0	0	0	0	0	0	0	0	1	0	0
	1140	M00741	Propanoyl-CoA metabolism, propanoyl-CoA => succinyl-CoA	map00640	Propanoate metabolism	Carbon fixation	3-hydroxypropionate bicycle	E5.4.99.2A, mcmA1; methylmalonyl-CoA mutase, N-terminal domain [EC:5.4.99.2]	E5.4.99.2A, mcmA1	methylmalonyl-CoA mutase, N-terminal domain [EC:5.4.99.2]	ec:5.4.99.2	K01848	---	---	0	1	0	0	0	0	0	0	0	0	0	0	0	0	0	0	0	1	0	0	0	0	0	0	0	0	0	0	0	0	0	0	1	0	0
	1141	M00741	Propanoyl-CoA metabolism, propanoyl-CoA => succinyl-CoA	map00640	Propanoate metabolism	Carbon fixation	Hydroxypropionate-hydroxybutylate cycle	E5.4.99.2A, mcmA1; methylmalonyl-CoA mutase, N-terminal domain [EC:5.4.99.2]	E5.4.99.2A, mcmA1	methylmalonyl-CoA mutase, N-terminal domain [EC:5.4.99.2]	ec:5.4.99.2	K01848	---	---	0	1	0	0	0	0	0	0	0	0	0	0	0	0	0	0	0	1	0	0	0	0	0	0	0	0	0	0	0	0	0	0	1	0	0
	1142	M00741	Propanoyl-CoA metabolism, propanoyl-CoA => succinyl-CoA	map00720	Carbon fixation pathways in prokaryotes	Carbon fixation	3-hydroxypropionate bicycle	E5.4.99.2A, mcmA1; methylmalonyl-CoA mutase, N-terminal domain [EC:5.4.99.2]	E5.4.99.2A, mcmA1	methylmalonyl-CoA mutase, N-terminal domain [EC:5.4.99.2]	ec:5.4.99.2	K01848	---	---	0	1	0	0	0	0	0	0	0	0	0	0	0	0	0	0	0	1	0	0	0	0	0	0	0	0	0	0	0	0	0	0	1	0	0
	1143	M00741	Propanoyl-CoA metabolism, propanoyl-CoA => succinyl-CoA	map00720	Carbon fixation pathways in prokaryotes	Carbon fixation	Hydroxypropionate-hydroxybutylate cycle	E5.4.99.2A, mcmA1; methylmalonyl-CoA mutase, N-terminal domain [EC:5.4.99.2]	E5.4.99.2A, mcmA1	methylmalonyl-CoA mutase, N-terminal domain [EC:5.4.99.2]	ec:5.4.99.2	K01848	---	---	0	1	0	0	0	0	0	0	0	0	0	0	0	0	0	0	0	1	0	0	0	0	0	0	0	0	0	0	0	0	0	0	1	0	0
	1144	M00741	Propanoyl-CoA metabolism, propanoyl-CoA => succinyl-CoA	map01100	Metabolic pathways	Carbon fixation	3-hydroxypropionate bicycle	E5.4.99.2A, mcmA1; methylmalonyl-CoA mutase, N-terminal domain [EC:5.4.99.2]	E5.4.99.2A, mcmA1	methylmalonyl-CoA mutase, N-terminal domain [EC:5.4.99.2]	ec:5.4.99.2	K01848	---	---	0	1	0	0	0	0	0	0	0	0	0	0	0	0	0	0	0	1	0	0	0	0	0	0	0	0	0	0	0	0	0	0	1	0	0
	1145	M00741	Propanoyl-CoA metabolism, propanoyl-CoA => succinyl-CoA	map01100	Metabolic pathways	Carbon fixation	Hydroxypropionate-hydroxybutylate cycle	E5.4.99.2A, mcmA1; methylmalonyl-CoA mutase, N-terminal domain [EC:5.4.99.2]	E5.4.99.2A, mcmA1	methylmalonyl-CoA mutase, N-terminal domain [EC:5.4.99.2]	ec:5.4.99.2	K01848	---	---	0	1	0	0	0	0	0	0	0	0	0	0	0	0	0	0	0	1	0	0	0	0	0	0	0	0	0	0	0	0	0	0	1	0	0
	1146	M00741	Propanoyl-CoA metabolism, propanoyl-CoA => succinyl-CoA	map01120	Microbial metabolism in diverse environments	Carbon fixation	3-hydroxypropionate bicycle	E5.4.99.2A, mcmA1; methylmalonyl-CoA mutase, N-terminal domain [EC:5.4.99.2]	E5.4.99.2A, mcmA1	methylmalonyl-CoA mutase, N-terminal domain [EC:5.4.99.2]	ec:5.4.99.2	K01848	---	---	0	1	0	0	0	0	0	0	0	0	0	0	0	0	0	0	0	1	0	0	0	0	0	0	0	0	0	0	0	0	0	0	1	0	0
	1147	M00741	Propanoyl-CoA metabolism, propanoyl-CoA => succinyl-CoA	map01120	Microbial metabolism in diverse environments	Carbon fixation	Hydroxypropionate-hydroxybutylate cycle	E5.4.99.2A, mcmA1; methylmalonyl-CoA mutase, N-terminal domain [EC:5.4.99.2]	E5.4.99.2A, mcmA1	methylmalonyl-CoA mutase, N-terminal domain [EC:5.4.99.2]	ec:5.4.99.2	K01848	---	---	0	1	0	0	0	0	0	0	0	0	0	0	0	0	0	0	0	1	0	0	0	0	0	0	0	0	0	0	0	0	0	0	1	0	0
	1148	M00741	Propanoyl-CoA metabolism, propanoyl-CoA => succinyl-CoA	map01200	Carbon metabolism	Carbon fixation	3-hydroxypropionate bicycle	E5.4.99.2A, mcmA1; methylmalonyl-CoA mutase, N-terminal domain [EC:5.4.99.2]	E5.4.99.2A, mcmA1	methylmalonyl-CoA mutase, N-terminal domain [EC:5.4.99.2]	ec:5.4.99.2	K01848	---	---	0	1	0	0	0	0	0	0	0	0	0	0	0	0	0	0	0	1	0	0	0	0	0	0	0	0	0	0	0	0	0	0	1	0	0
	1149	M00741	Propanoyl-CoA metabolism, propanoyl-CoA => succinyl-CoA	map01200	Carbon metabolism	Carbon fixation	Hydroxypropionate-hydroxybutylate cycle	E5.4.99.2A, mcmA1; methylmalonyl-CoA mutase, N-terminal domain [EC:5.4.99.2]	E5.4.99.2A, mcmA1	methylmalonyl-CoA mutase, N-terminal domain [EC:5.4.99.2]	ec:5.4.99.2	K01848	---	---	0	1	0	0	0	0	0	0	0	0	0	0	0	0	0	0	0	1	0	0	0	0	0	0	0	0	0	0	0	0	0	0	1	0	0
	1150	M00740	Methylaspartate cycle	map00220	Arginine biosynthesis	---	---	---	GLUD1_2, gdhA	glutamate dehydrogenase (NAD(P)+) [EC:1.4.1.3]	ec:1.4.1.3	K00261	---	---	1	0	1	1	0	0	0	0	0	1	0	0	0	1	0	0	1	0	0	0	1	1	0	1	0	0	0	1	0	1	0	0	0	1	1
	1151	M00740	Methylaspartate cycle	map00250	Alanine, aspartate and glutamate metabolism	---	---	---	GLUD1_2, gdhA	glutamate dehydrogenase (NAD(P)+) [EC:1.4.1.3]	ec:1.4.1.3	K00261	---	---	1	0	1	1	0	0	0	0	0	1	0	0	0	1	0	0	1	0	0	0	1	1	0	1	0	0	0	1	0	1	0	0	0	1	1
	1152	M00740	Methylaspartate cycle	map00471	D-Glutamine and D-glutamate metabolism	---	---	---	GLUD1_2, gdhA	glutamate dehydrogenase (NAD(P)+) [EC:1.4.1.3]	ec:1.4.1.3	K00261	---	---	1	0	1	1	0	0	0	0	0	1	0	0	0	1	0	0	1	0	0	0	1	1	0	1	0	0	0	1	0	1	0	0	0	1	1
	1153	M00740	Methylaspartate cycle	map00910	Nitrogen metabolism	---	---	---	GLUD1_2, gdhA	glutamate dehydrogenase (NAD(P)+) [EC:1.4.1.3]	ec:1.4.1.3	K00261	---	---	1	0	1	1	0	0	0	0	0	1	0	0	0	1	0	0	1	0	0	0	1	1	0	1	0	0	0	1	0	1	0	0	0	1	1
	1154	M00740	Methylaspartate cycle	map01100	Metabolic pathways	---	---	---	GLUD1_2, gdhA	glutamate dehydrogenase (NAD(P)+) [EC:1.4.1.3]	ec:1.4.1.3	K00261	---	---	1	0	1	1	0	0	0	0	0	1	0	0	0	1	0	0	1	0	0	0	1	1	0	1	0	0	0	1	0	1	0	0	0	1	1
	1155	M00740	Methylaspartate cycle	map01120	Microbial metabolism in diverse environments	---	---	---	GLUD1_2, gdhA	glutamate dehydrogenase (NAD(P)+) [EC:1.4.1.3]	ec:1.4.1.3	K00261	---	---	1	0	1	1	0	0	0	0	0	1	0	0	0	1	0	0	1	0	0	0	1	1	0	1	0	0	0	1	0	1	0	0	0	1	1
	1156	M00740	Methylaspartate cycle	map01200	Carbon metabolism	---	---	---	GLUD1_2, gdhA	glutamate dehydrogenase (NAD(P)+) [EC:1.4.1.3]	ec:1.4.1.3	K00261	---	---	1	0	1	1	0	0	0	0	0	1	0	0	0	1	0	0	1	0	0	0	1	1	0	1	0	0	0	1	0	1	0	0	0	1	1
	1157	M00740	Methylaspartate cycle	map04217	Necroptosis	---	---	---	GLUD1_2, gdhA	glutamate dehydrogenase (NAD(P)+) [EC:1.4.1.3]	ec:1.4.1.3	K00261	---	---	1	0	1	1	0	0	0	0	0	1	0	0	0	1	0	0	1	0	0	0	1	1	0	1	0	0	0	1	0	1	0	0	0	1	1
	1158	M00740	Methylaspartate cycle	map04964	Proximal tubule bicarbonate reclamation	---	---	---	GLUD1_2, gdhA	glutamate dehydrogenase (NAD(P)+) [EC:1.4.1.3]	ec:1.4.1.3	K00261	---	---	1	0	1	1	0	0	0	0	0	1	0	0	0	1	0	0	1	0	0	0	1	1	0	1	0	0	0	1	0	1	0	0	0	1	1
	1159	M00740	Methylaspartate cycle	map00020	Citrate cycle (TCA cycle)	Carbon fixation	Reductive citrate cycle	mdh; malate dehydrogenase [EC:1.1.1.37]	mdh	malate dehydrogenase [EC:1.1.1.37]	ec:1.1.1.37	K00024	---	---	1	0	1	1	1	0	0	0	1	1	1	1	1	1	1	0	1	0	1	0	1	1	0	1	1	1	0	1	0	1	1	0	0	1	1
	1160	M00740	Methylaspartate cycle	map00020	Citrate cycle (TCA cycle)	Carbon fixation	Dicarboxylate-hydroxybutyrate cycle	mdh; malate dehydrogenase [EC:1.1.1.37]	mdh	malate dehydrogenase [EC:1.1.1.37]	ec:1.1.1.37	K00024	---	---	1	0	1	1	1	0	0	0	1	1	1	1	1	1	1	0	1	0	1	0	1	1	0	1	1	1	0	1	0	1	1	0	0	1	1
	1161	M00740	Methylaspartate cycle	map00020	Citrate cycle (TCA cycle)	Central metabolism	TCA cycle	mdh; malate dehydrogenase [EC:1.1.1.37]	mdh	malate dehydrogenase [EC:1.1.1.37]	ec:1.1.1.37	K00024	---	---	1	0	1	1	1	0	0	0	1	1	1	1	1	1	1	0	1	0	1	0	1	1	0	1	1	1	0	1	0	1	1	0	0	1	1
	1162	M00740	Methylaspartate cycle	map00020	Citrate cycle (TCA cycle)	Fermentation	Mixed acid: succinate (phosphoenolpyruvate to succinate via oxaloacetate, malate & fumarate)	mdh; malate dehydrogenase	mdh	malate dehydrogenase [EC:1.1.1.37]	ec:1.1.1.37	K00024	---	---	1	0	1	1	1	0	0	0	1	1	1	1	1	1	1	0	1	0	1	0	1	1	0	1	1	1	0	1	0	1	1	0	0	1	1
	1163	M00740	Methylaspartate cycle	map00270	Cysteine and methionine metabolism	Carbon fixation	Reductive citrate cycle	mdh; malate dehydrogenase [EC:1.1.1.37]	mdh	malate dehydrogenase [EC:1.1.1.37]	ec:1.1.1.37	K00024	---	---	1	0	1	1	1	0	0	0	1	1	1	1	1	1	1	0	1	0	1	0	1	1	0	1	1	1	0	1	0	1	1	0	0	1	1
	1164	M00740	Methylaspartate cycle	map00270	Cysteine and methionine metabolism	Carbon fixation	Dicarboxylate-hydroxybutyrate cycle	mdh; malate dehydrogenase [EC:1.1.1.37]	mdh	malate dehydrogenase [EC:1.1.1.37]	ec:1.1.1.37	K00024	---	---	1	0	1	1	1	0	0	0	1	1	1	1	1	1	1	0	1	0	1	0	1	1	0	1	1	1	0	1	0	1	1	0	0	1	1
	1165	M00740	Methylaspartate cycle	map00270	Cysteine and methionine metabolism	Central metabolism	TCA cycle	mdh; malate dehydrogenase [EC:1.1.1.37]	mdh	malate dehydrogenase [EC:1.1.1.37]	ec:1.1.1.37	K00024	---	---	1	0	1	1	1	0	0	0	1	1	1	1	1	1	1	0	1	0	1	0	1	1	0	1	1	1	0	1	0	1	1	0	0	1	1
	1166	M00740	Methylaspartate cycle	map00270	Cysteine and methionine metabolism	Fermentation	Mixed acid: succinate (phosphoenolpyruvate to succinate via oxaloacetate, malate & fumarate)	mdh; malate dehydrogenase	mdh	malate dehydrogenase [EC:1.1.1.37]	ec:1.1.1.37	K00024	---	---	1	0	1	1	1	0	0	0	1	1	1	1	1	1	1	0	1	0	1	0	1	1	0	1	1	1	0	1	0	1	1	0	0	1	1
	1167	M00740	Methylaspartate cycle	map00620	Pyruvate metabolism	Carbon fixation	Reductive citrate cycle	mdh; malate dehydrogenase [EC:1.1.1.37]	mdh	malate dehydrogenase [EC:1.1.1.37]	ec:1.1.1.37	K00024	---	---	1	0	1	1	1	0	0	0	1	1	1	1	1	1	1	0	1	0	1	0	1	1	0	1	1	1	0	1	0	1	1	0	0	1	1
	1168	M00740	Methylaspartate cycle	map00620	Pyruvate metabolism	Carbon fixation	Dicarboxylate-hydroxybutyrate cycle	mdh; malate dehydrogenase [EC:1.1.1.37]	mdh	malate dehydrogenase [EC:1.1.1.37]	ec:1.1.1.37	K00024	---	---	1	0	1	1	1	0	0	0	1	1	1	1	1	1	1	0	1	0	1	0	1	1	0	1	1	1	0	1	0	1	1	0	0	1	1
	1169	M00740	Methylaspartate cycle	map00620	Pyruvate metabolism	Central metabolism	TCA cycle	mdh; malate dehydrogenase [EC:1.1.1.37]	mdh	malate dehydrogenase [EC:1.1.1.37]	ec:1.1.1.37	K00024	---	---	1	0	1	1	1	0	0	0	1	1	1	1	1	1	1	0	1	0	1	0	1	1	0	1	1	1	0	1	0	1	1	0	0	1	1
	1170	M00740	Methylaspartate cycle	map00620	Pyruvate metabolism	Fermentation	Mixed acid: succinate (phosphoenolpyruvate to succinate via oxaloacetate, malate & fumarate)	mdh; malate dehydrogenase	mdh	malate dehydrogenase [EC:1.1.1.37]	ec:1.1.1.37	K00024	---	---	1	0	1	1	1	0	0	0	1	1	1	1	1	1	1	0	1	0	1	0	1	1	0	1	1	1	0	1	0	1	1	0	0	1	1
	1171	M00740	Methylaspartate cycle	map00630	Glyoxylate and dicarboxylate metabolism	Carbon fixation	Reductive citrate cycle	mdh; malate dehydrogenase [EC:1.1.1.37]	mdh	malate dehydrogenase [EC:1.1.1.37]	ec:1.1.1.37	K00024	---	---	1	0	1	1	1	0	0	0	1	1	1	1	1	1	1	0	1	0	1	0	1	1	0	1	1	1	0	1	0	1	1	0	0	1	1
	1172	M00740	Methylaspartate cycle	map00630	Glyoxylate and dicarboxylate metabolism	Carbon fixation	Dicarboxylate-hydroxybutyrate cycle	mdh; malate dehydrogenase [EC:1.1.1.37]	mdh	malate dehydrogenase [EC:1.1.1.37]	ec:1.1.1.37	K00024	---	---	1	0	1	1	1	0	0	0	1	1	1	1	1	1	1	0	1	0	1	0	1	1	0	1	1	1	0	1	0	1	1	0	0	1	1
	1173	M00740	Methylaspartate cycle	map00630	Glyoxylate and dicarboxylate metabolism	Central metabolism	TCA cycle	mdh; malate dehydrogenase [EC:1.1.1.37]	mdh	malate dehydrogenase [EC:1.1.1.37]	ec:1.1.1.37	K00024	---	---	1	0	1	1	1	0	0	0	1	1	1	1	1	1	1	0	1	0	1	0	1	1	0	1	1	1	0	1	0	1	1	0	0	1	1
	1174	M00740	Methylaspartate cycle	map00630	Glyoxylate and dicarboxylate metabolism	Fermentation	Mixed acid: succinate (phosphoenolpyruvate to succinate via oxaloacetate, malate & fumarate)	mdh; malate dehydrogenase	mdh	malate dehydrogenase [EC:1.1.1.37]	ec:1.1.1.37	K00024	---	---	1	0	1	1	1	0	0	0	1	1	1	1	1	1	1	0	1	0	1	0	1	1	0	1	1	1	0	1	0	1	1	0	0	1	1
	1175	M00740	Methylaspartate cycle	map00680	Methane metabolism	Carbon fixation	Reductive citrate cycle	mdh; malate dehydrogenase [EC:1.1.1.37]	mdh	malate dehydrogenase [EC:1.1.1.37]	ec:1.1.1.37	K00024	---	---	1	0	1	1	1	0	0	0	1	1	1	1	1	1	1	0	1	0	1	0	1	1	0	1	1	1	0	1	0	1	1	0	0	1	1
	1176	M00740	Methylaspartate cycle	map00680	Methane metabolism	Carbon fixation	Dicarboxylate-hydroxybutyrate cycle	mdh; malate dehydrogenase [EC:1.1.1.37]	mdh	malate dehydrogenase [EC:1.1.1.37]	ec:1.1.1.37	K00024	---	---	1	0	1	1	1	0	0	0	1	1	1	1	1	1	1	0	1	0	1	0	1	1	0	1	1	1	0	1	0	1	1	0	0	1	1
	1177	M00740	Methylaspartate cycle	map00680	Methane metabolism	Central metabolism	TCA cycle	mdh; malate dehydrogenase [EC:1.1.1.37]	mdh	malate dehydrogenase [EC:1.1.1.37]	ec:1.1.1.37	K00024	---	---	1	0	1	1	1	0	0	0	1	1	1	1	1	1	1	0	1	0	1	0	1	1	0	1	1	1	0	1	0	1	1	0	0	1	1
	1178	M00740	Methylaspartate cycle	map00680	Methane metabolism	Fermentation	Mixed acid: succinate (phosphoenolpyruvate to succinate via oxaloacetate, malate & fumarate)	mdh; malate dehydrogenase	mdh	malate dehydrogenase [EC:1.1.1.37]	ec:1.1.1.37	K00024	---	---	1	0	1	1	1	0	0	0	1	1	1	1	1	1	1	0	1	0	1	0	1	1	0	1	1	1	0	1	0	1	1	0	0	1	1
	1179	M00740	Methylaspartate cycle	map00710	Carbon fixation in photosynthetic organisms	Carbon fixation	Reductive citrate cycle	mdh; malate dehydrogenase [EC:1.1.1.37]	mdh	malate dehydrogenase [EC:1.1.1.37]	ec:1.1.1.37	K00024	---	---	1	0	1	1	1	0	0	0	1	1	1	1	1	1	1	0	1	0	1	0	1	1	0	1	1	1	0	1	0	1	1	0	0	1	1
	1180	M00740	Methylaspartate cycle	map00710	Carbon fixation in photosynthetic organisms	Carbon fixation	Dicarboxylate-hydroxybutyrate cycle	mdh; malate dehydrogenase [EC:1.1.1.37]	mdh	malate dehydrogenase [EC:1.1.1.37]	ec:1.1.1.37	K00024	---	---	1	0	1	1	1	0	0	0	1	1	1	1	1	1	1	0	1	0	1	0	1	1	0	1	1	1	0	1	0	1	1	0	0	1	1
	1181	M00740	Methylaspartate cycle	map00710	Carbon fixation in photosynthetic organisms	Central metabolism	TCA cycle	mdh; malate dehydrogenase [EC:1.1.1.37]	mdh	malate dehydrogenase [EC:1.1.1.37]	ec:1.1.1.37	K00024	---	---	1	0	1	1	1	0	0	0	1	1	1	1	1	1	1	0	1	0	1	0	1	1	0	1	1	1	0	1	0	1	1	0	0	1	1
	1182	M00740	Methylaspartate cycle	map00710	Carbon fixation in photosynthetic organisms	Fermentation	Mixed acid: succinate (phosphoenolpyruvate to succinate via oxaloacetate, malate & fumarate)	mdh; malate dehydrogenase	mdh	malate dehydrogenase [EC:1.1.1.37]	ec:1.1.1.37	K00024	---	---	1	0	1	1	1	0	0	0	1	1	1	1	1	1	1	0	1	0	1	0	1	1	0	1	1	1	0	1	0	1	1	0	0	1	1
	1183	M00740	Methylaspartate cycle	map00720	Carbon fixation pathways in prokaryotes	Carbon fixation	Reductive citrate cycle	mdh; malate dehydrogenase [EC:1.1.1.37]	mdh	malate dehydrogenase [EC:1.1.1.37]	ec:1.1.1.37	K00024	---	---	1	0	1	1	1	0	0	0	1	1	1	1	1	1	1	0	1	0	1	0	1	1	0	1	1	1	0	1	0	1	1	0	0	1	1
	1184	M00740	Methylaspartate cycle	map00720	Carbon fixation pathways in prokaryotes	Carbon fixation	Dicarboxylate-hydroxybutyrate cycle	mdh; malate dehydrogenase [EC:1.1.1.37]	mdh	malate dehydrogenase [EC:1.1.1.37]	ec:1.1.1.37	K00024	---	---	1	0	1	1	1	0	0	0	1	1	1	1	1	1	1	0	1	0	1	0	1	1	0	1	1	1	0	1	0	1	1	0	0	1	1
	1185	M00740	Methylaspartate cycle	map00720	Carbon fixation pathways in prokaryotes	Central metabolism	TCA cycle	mdh; malate dehydrogenase [EC:1.1.1.37]	mdh	malate dehydrogenase [EC:1.1.1.37]	ec:1.1.1.37	K00024	---	---	1	0	1	1	1	0	0	0	1	1	1	1	1	1	1	0	1	0	1	0	1	1	0	1	1	1	0	1	0	1	1	0	0	1	1
	1186	M00740	Methylaspartate cycle	map00720	Carbon fixation pathways in prokaryotes	Fermentation	Mixed acid: succinate (phosphoenolpyruvate to succinate via oxaloacetate, malate & fumarate)	mdh; malate dehydrogenase	mdh	malate dehydrogenase [EC:1.1.1.37]	ec:1.1.1.37	K00024	---	---	1	0	1	1	1	0	0	0	1	1	1	1	1	1	1	0	1	0	1	0	1	1	0	1	1	1	0	1	0	1	1	0	0	1	1
	1187	M00740	Methylaspartate cycle	map01100	Metabolic pathways	Carbon fixation	Reductive citrate cycle	mdh; malate dehydrogenase [EC:1.1.1.37]	mdh	malate dehydrogenase [EC:1.1.1.37]	ec:1.1.1.37	K00024	---	---	1	0	1	1	1	0	0	0	1	1	1	1	1	1	1	0	1	0	1	0	1	1	0	1	1	1	0	1	0	1	1	0	0	1	1
	1188	M00740	Methylaspartate cycle	map01100	Metabolic pathways	Carbon fixation	Dicarboxylate-hydroxybutyrate cycle	mdh; malate dehydrogenase [EC:1.1.1.37]	mdh	malate dehydrogenase [EC:1.1.1.37]	ec:1.1.1.37	K00024	---	---	1	0	1	1	1	0	0	0	1	1	1	1	1	1	1	0	1	0	1	0	1	1	0	1	1	1	0	1	0	1	1	0	0	1	1
	1189	M00740	Methylaspartate cycle	map01100	Metabolic pathways	Central metabolism	TCA cycle	mdh; malate dehydrogenase [EC:1.1.1.37]	mdh	malate dehydrogenase [EC:1.1.1.37]	ec:1.1.1.37	K00024	---	---	1	0	1	1	1	0	0	0	1	1	1	1	1	1	1	0	1	0	1	0	1	1	0	1	1	1	0	1	0	1	1	0	0	1	1
	1190	M00740	Methylaspartate cycle	map01100	Metabolic pathways	Fermentation	Mixed acid: succinate (phosphoenolpyruvate to succinate via oxaloacetate, malate & fumarate)	mdh; malate dehydrogenase	mdh	malate dehydrogenase [EC:1.1.1.37]	ec:1.1.1.37	K00024	---	---	1	0	1	1	1	0	0	0	1	1	1	1	1	1	1	0	1	0	1	0	1	1	0	1	1	1	0	1	0	1	1	0	0	1	1
	1191	M00740	Methylaspartate cycle	map01110	Biosynthesis of secondary metabolites	Carbon fixation	Reductive citrate cycle	mdh; malate dehydrogenase [EC:1.1.1.37]	mdh	malate dehydrogenase [EC:1.1.1.37]	ec:1.1.1.37	K00024	---	---	1	0	1	1	1	0	0	0	1	1	1	1	1	1	1	0	1	0	1	0	1	1	0	1	1	1	0	1	0	1	1	0	0	1	1
	1192	M00740	Methylaspartate cycle	map01110	Biosynthesis of secondary metabolites	Carbon fixation	Dicarboxylate-hydroxybutyrate cycle	mdh; malate dehydrogenase [EC:1.1.1.37]	mdh	malate dehydrogenase [EC:1.1.1.37]	ec:1.1.1.37	K00024	---	---	1	0	1	1	1	0	0	0	1	1	1	1	1	1	1	0	1	0	1	0	1	1	0	1	1	1	0	1	0	1	1	0	0	1	1
	1193	M00740	Methylaspartate cycle	map01110	Biosynthesis of secondary metabolites	Central metabolism	TCA cycle	mdh; malate dehydrogenase [EC:1.1.1.37]	mdh	malate dehydrogenase [EC:1.1.1.37]	ec:1.1.1.37	K00024	---	---	1	0	1	1	1	0	0	0	1	1	1	1	1	1	1	0	1	0	1	0	1	1	0	1	1	1	0	1	0	1	1	0	0	1	1
	1194	M00740	Methylaspartate cycle	map01110	Biosynthesis of secondary metabolites	Fermentation	Mixed acid: succinate (phosphoenolpyruvate to succinate via oxaloacetate, malate & fumarate)	mdh; malate dehydrogenase	mdh	malate dehydrogenase [EC:1.1.1.37]	ec:1.1.1.37	K00024	---	---	1	0	1	1	1	0	0	0	1	1	1	1	1	1	1	0	1	0	1	0	1	1	0	1	1	1	0	1	0	1	1	0	0	1	1
	1195	M00740	Methylaspartate cycle	map01120	Microbial metabolism in diverse environments	Carbon fixation	Reductive citrate cycle	mdh; malate dehydrogenase [EC:1.1.1.37]	mdh	malate dehydrogenase [EC:1.1.1.37]	ec:1.1.1.37	K00024	---	---	1	0	1	1	1	0	0	0	1	1	1	1	1	1	1	0	1	0	1	0	1	1	0	1	1	1	0	1	0	1	1	0	0	1	1
	1196	M00740	Methylaspartate cycle	map01120	Microbial metabolism in diverse environments	Carbon fixation	Dicarboxylate-hydroxybutyrate cycle	mdh; malate dehydrogenase [EC:1.1.1.37]	mdh	malate dehydrogenase [EC:1.1.1.37]	ec:1.1.1.37	K00024	---	---	1	0	1	1	1	0	0	0	1	1	1	1	1	1	1	0	1	0	1	0	1	1	0	1	1	1	0	1	0	1	1	0	0	1	1
	1197	M00740	Methylaspartate cycle	map01120	Microbial metabolism in diverse environments	Central metabolism	TCA cycle	mdh; malate dehydrogenase [EC:1.1.1.37]	mdh	malate dehydrogenase [EC:1.1.1.37]	ec:1.1.1.37	K00024	---	---	1	0	1	1	1	0	0	0	1	1	1	1	1	1	1	0	1	0	1	0	1	1	0	1	1	1	0	1	0	1	1	0	0	1	1
	1198	M00740	Methylaspartate cycle	map01120	Microbial metabolism in diverse environments	Fermentation	Mixed acid: succinate (phosphoenolpyruvate to succinate via oxaloacetate, malate & fumarate)	mdh; malate dehydrogenase	mdh	malate dehydrogenase [EC:1.1.1.37]	ec:1.1.1.37	K00024	---	---	1	0	1	1	1	0	0	0	1	1	1	1	1	1	1	0	1	0	1	0	1	1	0	1	1	1	0	1	0	1	1	0	0	1	1
	1199	M00740	Methylaspartate cycle	map01200	Carbon metabolism	Carbon fixation	Reductive citrate cycle	mdh; malate dehydrogenase [EC:1.1.1.37]	mdh	malate dehydrogenase [EC:1.1.1.37]	ec:1.1.1.37	K00024	---	---	1	0	1	1	1	0	0	0	1	1	1	1	1	1	1	0	1	0	1	0	1	1	0	1	1	1	0	1	0	1	1	0	0	1	1
	1200	M00740	Methylaspartate cycle	map01200	Carbon metabolism	Carbon fixation	Dicarboxylate-hydroxybutyrate cycle	mdh; malate dehydrogenase [EC:1.1.1.37]	mdh	malate dehydrogenase [EC:1.1.1.37]	ec:1.1.1.37	K00024	---	---	1	0	1	1	1	0	0	0	1	1	1	1	1	1	1	0	1	0	1	0	1	1	0	1	1	1	0	1	0	1	1	0	0	1	1
	1201	M00740	Methylaspartate cycle	map01200	Carbon metabolism	Central metabolism	TCA cycle	mdh; malate dehydrogenase [EC:1.1.1.37]	mdh	malate dehydrogenase [EC:1.1.1.37]	ec:1.1.1.37	K00024	---	---	1	0	1	1	1	0	0	0	1	1	1	1	1	1	1	0	1	0	1	0	1	1	0	1	1	1	0	1	0	1	1	0	0	1	1
	1202	M00740	Methylaspartate cycle	map01200	Carbon metabolism	Fermentation	Mixed acid: succinate (phosphoenolpyruvate to succinate via oxaloacetate, malate & fumarate)	mdh; malate dehydrogenase	mdh	malate dehydrogenase [EC:1.1.1.37]	ec:1.1.1.37	K00024	---	---	1	0	1	1	1	0	0	0	1	1	1	1	1	1	1	0	1	0	1	0	1	1	0	1	1	1	0	1	0	1	1	0	0	1	1
	1203	M00740	Methylaspartate cycle	map00630	Glyoxylate and dicarboxylate metabolism	Carbon fixation	3-hydroxypropionate bicycle	mch, mcd; 2-methylfumaryl-CoA hydratase [EC:4.2.1.148]	mch, mcd	2-methylfumaryl-CoA hydratase [EC:4.2.1.148]	ec:4.2.1.148	K14449	---	---	1	0	0	1	1	0	0	1	0	0	0	1	1	1	1	0	1	0	0	0	1	1	0	1	1	0	0	0	0	1	0	0	0	1	1
	1204	M00740	Methylaspartate cycle	map00660	C5-Branched dibasic acid metabolism	Carbon fixation	3-hydroxypropionate bicycle	mch, mcd; 2-methylfumaryl-CoA hydratase [EC:4.2.1.148]	mch, mcd	2-methylfumaryl-CoA hydratase [EC:4.2.1.148]	ec:4.2.1.148	K14449	---	---	1	0	0	1	1	0	0	1	0	0	0	1	1	1	1	0	1	0	0	0	1	1	0	1	1	0	0	0	0	1	0	0	0	1	1
	1205	M00740	Methylaspartate cycle	map00720	Carbon fixation pathways in prokaryotes	Carbon fixation	3-hydroxypropionate bicycle	mch, mcd; 2-methylfumaryl-CoA hydratase [EC:4.2.1.148]	mch, mcd	2-methylfumaryl-CoA hydratase [EC:4.2.1.148]	ec:4.2.1.148	K14449	---	---	1	0	0	1	1	0	0	1	0	0	0	1	1	1	1	0	1	0	0	0	1	1	0	1	1	0	0	0	0	1	0	0	0	1	1
	1206	M00740	Methylaspartate cycle	map01100	Metabolic pathways	Carbon fixation	3-hydroxypropionate bicycle	mch, mcd; 2-methylfumaryl-CoA hydratase [EC:4.2.1.148]	mch, mcd	2-methylfumaryl-CoA hydratase [EC:4.2.1.148]	ec:4.2.1.148	K14449	---	---	1	0	0	1	1	0	0	1	0	0	0	1	1	1	1	0	1	0	0	0	1	1	0	1	1	0	0	0	0	1	0	0	0	1	1
	1207	M00740	Methylaspartate cycle	map01120	Microbial metabolism in diverse environments	Carbon fixation	3-hydroxypropionate bicycle	mch, mcd; 2-methylfumaryl-CoA hydratase [EC:4.2.1.148]	mch, mcd	2-methylfumaryl-CoA hydratase [EC:4.2.1.148]	ec:4.2.1.148	K14449	---	---	1	0	0	1	1	0	0	1	0	0	0	1	1	1	1	0	1	0	0	0	1	1	0	1	1	0	0	0	0	1	0	0	0	1	1
	1208	M00740	Methylaspartate cycle	map01200	Carbon metabolism	Carbon fixation	3-hydroxypropionate bicycle	mch, mcd; 2-methylfumaryl-CoA hydratase [EC:4.2.1.148]	mch, mcd	2-methylfumaryl-CoA hydratase [EC:4.2.1.148]	ec:4.2.1.148	K14449	---	---	1	0	0	1	1	0	0	1	0	0	0	1	1	1	1	0	1	0	0	0	1	1	0	1	1	0	0	0	0	1	0	0	0	1	1
	1209	M00740	Methylaspartate cycle	map00020	Citrate cycle (TCA cycle)	Carbon fixation	Reductive citrate cycle	IDH1, IDH2, icd; isocitrate dehydrogenase [EC:1.1.1.42]	IDH1, IDH2, icd	isocitrate dehydrogenase [EC:1.1.1.42]	ec:1.1.1.42	K00031	---	---	1	0	1	0	1	0	0	0	1	0	1	0	0	0	1	0	1	0	0	1	1	0	0	0	0	0	0	0	0	1	1	0	0	0	0
	1210	M00740	Methylaspartate cycle	map00020	Citrate cycle (TCA cycle)	Central metabolism	TCA cycle	IDH1, IDH2, icd; isocitrate dehydrogenase [EC:1.1.1.42]	IDH1, IDH2, icd	isocitrate dehydrogenase [EC:1.1.1.42]	ec:1.1.1.42	K00031	---	---	1	0	1	0	1	0	0	0	1	0	1	0	0	0	1	0	1	0	0	1	1	0	0	0	0	0	0	0	0	1	1	0	0	0	0
	1211	M00740	Methylaspartate cycle	map00480	Glutathione metabolism	Carbon fixation	Reductive citrate cycle	IDH1, IDH2, icd; isocitrate dehydrogenase [EC:1.1.1.42]	IDH1, IDH2, icd	isocitrate dehydrogenase [EC:1.1.1.42]	ec:1.1.1.42	K00031	---	---	1	0	1	0	1	0	0	0	1	0	1	0	0	0	1	0	1	0	0	1	1	0	0	0	0	0	0	0	0	1	1	0	0	0	0
	1212	M00740	Methylaspartate cycle	map00480	Glutathione metabolism	Central metabolism	TCA cycle	IDH1, IDH2, icd; isocitrate dehydrogenase [EC:1.1.1.42]	IDH1, IDH2, icd	isocitrate dehydrogenase [EC:1.1.1.42]	ec:1.1.1.42	K00031	---	---	1	0	1	0	1	0	0	0	1	0	1	0	0	0	1	0	1	0	0	1	1	0	0	0	0	0	0	0	0	1	1	0	0	0	0
	1213	M00740	Methylaspartate cycle	map00720	Carbon fixation pathways in prokaryotes	Carbon fixation	Reductive citrate cycle	IDH1, IDH2, icd; isocitrate dehydrogenase [EC:1.1.1.42]	IDH1, IDH2, icd	isocitrate dehydrogenase [EC:1.1.1.42]	ec:1.1.1.42	K00031	---	---	1	0	1	0	1	0	0	0	1	0	1	0	0	0	1	0	1	0	0	1	1	0	0	0	0	0	0	0	0	1	1	0	0	0	0
	1214	M00740	Methylaspartate cycle	map00720	Carbon fixation pathways in prokaryotes	Central metabolism	TCA cycle	IDH1, IDH2, icd; isocitrate dehydrogenase [EC:1.1.1.42]	IDH1, IDH2, icd	isocitrate dehydrogenase [EC:1.1.1.42]	ec:1.1.1.42	K00031	---	---	1	0	1	0	1	0	0	0	1	0	1	0	0	0	1	0	1	0	0	1	1	0	0	0	0	0	0	0	0	1	1	0	0	0	0
	1215	M00740	Methylaspartate cycle	map01100	Metabolic pathways	Carbon fixation	Reductive citrate cycle	IDH1, IDH2, icd; isocitrate dehydrogenase [EC:1.1.1.42]	IDH1, IDH2, icd	isocitrate dehydrogenase [EC:1.1.1.42]	ec:1.1.1.42	K00031	---	---	1	0	1	0	1	0	0	0	1	0	1	0	0	0	1	0	1	0	0	1	1	0	0	0	0	0	0	0	0	1	1	0	0	0	0
	1216	M00740	Methylaspartate cycle	map01100	Metabolic pathways	Central metabolism	TCA cycle	IDH1, IDH2, icd; isocitrate dehydrogenase [EC:1.1.1.42]	IDH1, IDH2, icd	isocitrate dehydrogenase [EC:1.1.1.42]	ec:1.1.1.42	K00031	---	---	1	0	1	0	1	0	0	0	1	0	1	0	0	0	1	0	1	0	0	1	1	0	0	0	0	0	0	0	0	1	1	0	0	0	0
	1217	M00740	Methylaspartate cycle	map01110	Biosynthesis of secondary metabolites	Carbon fixation	Reductive citrate cycle	IDH1, IDH2, icd; isocitrate dehydrogenase [EC:1.1.1.42]	IDH1, IDH2, icd	isocitrate dehydrogenase [EC:1.1.1.42]	ec:1.1.1.42	K00031	---	---	1	0	1	0	1	0	0	0	1	0	1	0	0	0	1	0	1	0	0	1	1	0	0	0	0	0	0	0	0	1	1	0	0	0	0
	1218	M00740	Methylaspartate cycle	map01110	Biosynthesis of secondary metabolites	Central metabolism	TCA cycle	IDH1, IDH2, icd; isocitrate dehydrogenase [EC:1.1.1.42]	IDH1, IDH2, icd	isocitrate dehydrogenase [EC:1.1.1.42]	ec:1.1.1.42	K00031	---	---	1	0	1	0	1	0	0	0	1	0	1	0	0	0	1	0	1	0	0	1	1	0	0	0	0	0	0	0	0	1	1	0	0	0	0
	1219	M00740	Methylaspartate cycle	map01120	Microbial metabolism in diverse environments	Carbon fixation	Reductive citrate cycle	IDH1, IDH2, icd; isocitrate dehydrogenase [EC:1.1.1.42]	IDH1, IDH2, icd	isocitrate dehydrogenase [EC:1.1.1.42]	ec:1.1.1.42	K00031	---	---	1	0	1	0	1	0	0	0	1	0	1	0	0	0	1	0	1	0	0	1	1	0	0	0	0	0	0	0	0	1	1	0	0	0	0
	1220	M00740	Methylaspartate cycle	map01120	Microbial metabolism in diverse environments	Central metabolism	TCA cycle	IDH1, IDH2, icd; isocitrate dehydrogenase [EC:1.1.1.42]	IDH1, IDH2, icd	isocitrate dehydrogenase [EC:1.1.1.42]	ec:1.1.1.42	K00031	---	---	1	0	1	0	1	0	0	0	1	0	1	0	0	0	1	0	1	0	0	1	1	0	0	0	0	0	0	0	0	1	1	0	0	0	0
	1221	M00740	Methylaspartate cycle	map01200	Carbon metabolism	Carbon fixation	Reductive citrate cycle	IDH1, IDH2, icd; isocitrate dehydrogenase [EC:1.1.1.42]	IDH1, IDH2, icd	isocitrate dehydrogenase [EC:1.1.1.42]	ec:1.1.1.42	K00031	---	---	1	0	1	0	1	0	0	0	1	0	1	0	0	0	1	0	1	0	0	1	1	0	0	0	0	0	0	0	0	1	1	0	0	0	0
	1222	M00740	Methylaspartate cycle	map01200	Carbon metabolism	Central metabolism	TCA cycle	IDH1, IDH2, icd; isocitrate dehydrogenase [EC:1.1.1.42]	IDH1, IDH2, icd	isocitrate dehydrogenase [EC:1.1.1.42]	ec:1.1.1.42	K00031	---	---	1	0	1	0	1	0	0	0	1	0	1	0	0	0	1	0	1	0	0	1	1	0	0	0	0	0	0	0	0	1	1	0	0	0	0
	1223	M00740	Methylaspartate cycle	map01210	2-Oxocarboxylic acid metabolism	Carbon fixation	Reductive citrate cycle	IDH1, IDH2, icd; isocitrate dehydrogenase [EC:1.1.1.42]	IDH1, IDH2, icd	isocitrate dehydrogenase [EC:1.1.1.42]	ec:1.1.1.42	K00031	---	---	1	0	1	0	1	0	0	0	1	0	1	0	0	0	1	0	1	0	0	1	1	0	0	0	0	0	0	0	0	1	1	0	0	0	0
	1224	M00740	Methylaspartate cycle	map01210	2-Oxocarboxylic acid metabolism	Central metabolism	TCA cycle	IDH1, IDH2, icd; isocitrate dehydrogenase [EC:1.1.1.42]	IDH1, IDH2, icd	isocitrate dehydrogenase [EC:1.1.1.42]	ec:1.1.1.42	K00031	---	---	1	0	1	0	1	0	0	0	1	0	1	0	0	0	1	0	1	0	0	1	1	0	0	0	0	0	0	0	0	1	1	0	0	0	0
	1225	M00740	Methylaspartate cycle	map01230	Biosynthesis of amino acids	Carbon fixation	Reductive citrate cycle	IDH1, IDH2, icd; isocitrate dehydrogenase [EC:1.1.1.42]	IDH1, IDH2, icd	isocitrate dehydrogenase [EC:1.1.1.42]	ec:1.1.1.42	K00031	---	---	1	0	1	0	1	0	0	0	1	0	1	0	0	0	1	0	1	0	0	1	1	0	0	0	0	0	0	0	0	1	1	0	0	0	0
	1226	M00740	Methylaspartate cycle	map01230	Biosynthesis of amino acids	Central metabolism	TCA cycle	IDH1, IDH2, icd; isocitrate dehydrogenase [EC:1.1.1.42]	IDH1, IDH2, icd	isocitrate dehydrogenase [EC:1.1.1.42]	ec:1.1.1.42	K00031	---	---	1	0	1	0	1	0	0	0	1	0	1	0	0	0	1	0	1	0	0	1	1	0	0	0	0	0	0	0	0	1	1	0	0	0	0
	1227	M00740	Methylaspartate cycle	map04146	Peroxisome	Carbon fixation	Reductive citrate cycle	IDH1, IDH2, icd; isocitrate dehydrogenase [EC:1.1.1.42]	IDH1, IDH2, icd	isocitrate dehydrogenase [EC:1.1.1.42]	ec:1.1.1.42	K00031	---	---	1	0	1	0	1	0	0	0	1	0	1	0	0	0	1	0	1	0	0	1	1	0	0	0	0	0	0	0	0	1	1	0	0	0	0
	1228	M00740	Methylaspartate cycle	map04146	Peroxisome	Central metabolism	TCA cycle	IDH1, IDH2, icd; isocitrate dehydrogenase [EC:1.1.1.42]	IDH1, IDH2, icd	isocitrate dehydrogenase [EC:1.1.1.42]	ec:1.1.1.42	K00031	---	---	1	0	1	0	1	0	0	0	1	0	1	0	0	0	1	0	1	0	0	1	1	0	0	0	0	0	0	0	0	1	1	0	0	0	0
	1229	M00740	Methylaspartate cycle	map05230	Central carbon metabolism in cancer	Carbon fixation	Reductive citrate cycle	IDH1, IDH2, icd; isocitrate dehydrogenase [EC:1.1.1.42]	IDH1, IDH2, icd	isocitrate dehydrogenase [EC:1.1.1.42]	ec:1.1.1.42	K00031	---	---	1	0	1	0	1	0	0	0	1	0	1	0	0	0	1	0	1	0	0	1	1	0	0	0	0	0	0	0	0	1	1	0	0	0	0
	1230	M00740	Methylaspartate cycle	map05230	Central carbon metabolism in cancer	Central metabolism	TCA cycle	IDH1, IDH2, icd; isocitrate dehydrogenase [EC:1.1.1.42]	IDH1, IDH2, icd	isocitrate dehydrogenase [EC:1.1.1.42]	ec:1.1.1.42	K00031	---	---	1	0	1	0	1	0	0	0	1	0	1	0	0	0	1	0	1	0	0	1	1	0	0	0	0	0	0	0	0	1	1	0	0	0	0
	1231	M00740	Methylaspartate cycle	map00020	Citrate cycle (TCA cycle)	Carbon fixation	Reductive citrate cycle	ACO, acnA; aconitate hydratase [EC:4.2.1.3]	ACO, acnA	aconitate hydratase [EC:4.2.1.3]	ec:4.2.1.3	K01681	---	---	1	2	1	1	1	0	1	1	1	0	0	1	1	1	1	1	1	1	0	2	1	1	1	1	0	0	0	0	1	1	1	1	1	1	1
	1232	M00740	Methylaspartate cycle	map00020	Citrate cycle (TCA cycle)	Central metabolism	TCA cycle	ACO, acnA; aconitate hydratase [EC:4.2.1.3]	ACO, acnA	aconitate hydratase [EC:4.2.1.3]	ec:4.2.1.3	K01681	---	---	1	2	1	1	1	0	1	1	1	0	0	1	1	1	1	1	1	1	0	2	1	1	1	1	0	0	0	0	1	1	1	1	1	1	1
	1233	M00740	Methylaspartate cycle	map00630	Glyoxylate and dicarboxylate metabolism	Carbon fixation	Reductive citrate cycle	ACO, acnA; aconitate hydratase [EC:4.2.1.3]	ACO, acnA	aconitate hydratase [EC:4.2.1.3]	ec:4.2.1.3	K01681	---	---	1	2	1	1	1	0	1	1	1	0	0	1	1	1	1	1	1	1	0	2	1	1	1	1	0	0	0	0	1	1	1	1	1	1	1
	1234	M00740	Methylaspartate cycle	map00630	Glyoxylate and dicarboxylate metabolism	Central metabolism	TCA cycle	ACO, acnA; aconitate hydratase [EC:4.2.1.3]	ACO, acnA	aconitate hydratase [EC:4.2.1.3]	ec:4.2.1.3	K01681	---	---	1	2	1	1	1	0	1	1	1	0	0	1	1	1	1	1	1	1	0	2	1	1	1	1	0	0	0	0	1	1	1	1	1	1	1
	1235	M00740	Methylaspartate cycle	map00720	Carbon fixation pathways in prokaryotes	Carbon fixation	Reductive citrate cycle	ACO, acnA; aconitate hydratase [EC:4.2.1.3]	ACO, acnA	aconitate hydratase [EC:4.2.1.3]	ec:4.2.1.3	K01681	---	---	1	2	1	1	1	0	1	1	1	0	0	1	1	1	1	1	1	1	0	2	1	1	1	1	0	0	0	0	1	1	1	1	1	1	1
	1236	M00740	Methylaspartate cycle	map00720	Carbon fixation pathways in prokaryotes	Central metabolism	TCA cycle	ACO, acnA; aconitate hydratase [EC:4.2.1.3]	ACO, acnA	aconitate hydratase [EC:4.2.1.3]	ec:4.2.1.3	K01681	---	---	1	2	1	1	1	0	1	1	1	0	0	1	1	1	1	1	1	1	0	2	1	1	1	1	0	0	0	0	1	1	1	1	1	1	1
	1237	M00740	Methylaspartate cycle	map01100	Metabolic pathways	Carbon fixation	Reductive citrate cycle	ACO, acnA; aconitate hydratase [EC:4.2.1.3]	ACO, acnA	aconitate hydratase [EC:4.2.1.3]	ec:4.2.1.3	K01681	---	---	1	2	1	1	1	0	1	1	1	0	0	1	1	1	1	1	1	1	0	2	1	1	1	1	0	0	0	0	1	1	1	1	1	1	1
	1238	M00740	Methylaspartate cycle	map01100	Metabolic pathways	Central metabolism	TCA cycle	ACO, acnA; aconitate hydratase [EC:4.2.1.3]	ACO, acnA	aconitate hydratase [EC:4.2.1.3]	ec:4.2.1.3	K01681	---	---	1	2	1	1	1	0	1	1	1	0	0	1	1	1	1	1	1	1	0	2	1	1	1	1	0	0	0	0	1	1	1	1	1	1	1
	1239	M00740	Methylaspartate cycle	map01110	Biosynthesis of secondary metabolites	Carbon fixation	Reductive citrate cycle	ACO, acnA; aconitate hydratase [EC:4.2.1.3]	ACO, acnA	aconitate hydratase [EC:4.2.1.3]	ec:4.2.1.3	K01681	---	---	1	2	1	1	1	0	1	1	1	0	0	1	1	1	1	1	1	1	0	2	1	1	1	1	0	0	0	0	1	1	1	1	1	1	1
	1240	M00740	Methylaspartate cycle	map01110	Biosynthesis of secondary metabolites	Central metabolism	TCA cycle	ACO, acnA; aconitate hydratase [EC:4.2.1.3]	ACO, acnA	aconitate hydratase [EC:4.2.1.3]	ec:4.2.1.3	K01681	---	---	1	2	1	1	1	0	1	1	1	0	0	1	1	1	1	1	1	1	0	2	1	1	1	1	0	0	0	0	1	1	1	1	1	1	1
	1241	M00740	Methylaspartate cycle	map01120	Microbial metabolism in diverse environments	Carbon fixation	Reductive citrate cycle	ACO, acnA; aconitate hydratase [EC:4.2.1.3]	ACO, acnA	aconitate hydratase [EC:4.2.1.3]	ec:4.2.1.3	K01681	---	---	1	2	1	1	1	0	1	1	1	0	0	1	1	1	1	1	1	1	0	2	1	1	1	1	0	0	0	0	1	1	1	1	1	1	1
	1242	M00740	Methylaspartate cycle	map01120	Microbial metabolism in diverse environments	Central metabolism	TCA cycle	ACO, acnA; aconitate hydratase [EC:4.2.1.3]	ACO, acnA	aconitate hydratase [EC:4.2.1.3]	ec:4.2.1.3	K01681	---	---	1	2	1	1	1	0	1	1	1	0	0	1	1	1	1	1	1	1	0	2	1	1	1	1	0	0	0	0	1	1	1	1	1	1	1
	1243	M00740	Methylaspartate cycle	map01200	Carbon metabolism	Carbon fixation	Reductive citrate cycle	ACO, acnA; aconitate hydratase [EC:4.2.1.3]	ACO, acnA	aconitate hydratase [EC:4.2.1.3]	ec:4.2.1.3	K01681	---	---	1	2	1	1	1	0	1	1	1	0	0	1	1	1	1	1	1	1	0	2	1	1	1	1	0	0	0	0	1	1	1	1	1	1	1
	1244	M00740	Methylaspartate cycle	map01200	Carbon metabolism	Central metabolism	TCA cycle	ACO, acnA; aconitate hydratase [EC:4.2.1.3]	ACO, acnA	aconitate hydratase [EC:4.2.1.3]	ec:4.2.1.3	K01681	---	---	1	2	1	1	1	0	1	1	1	0	0	1	1	1	1	1	1	1	0	2	1	1	1	1	0	0	0	0	1	1	1	1	1	1	1
	1245	M00740	Methylaspartate cycle	map01210	2-Oxocarboxylic acid metabolism	Carbon fixation	Reductive citrate cycle	ACO, acnA; aconitate hydratase [EC:4.2.1.3]	ACO, acnA	aconitate hydratase [EC:4.2.1.3]	ec:4.2.1.3	K01681	---	---	1	2	1	1	1	0	1	1	1	0	0	1	1	1	1	1	1	1	0	2	1	1	1	1	0	0	0	0	1	1	1	1	1	1	1
	1246	M00740	Methylaspartate cycle	map01210	2-Oxocarboxylic acid metabolism	Central metabolism	TCA cycle	ACO, acnA; aconitate hydratase [EC:4.2.1.3]	ACO, acnA	aconitate hydratase [EC:4.2.1.3]	ec:4.2.1.3	K01681	---	---	1	2	1	1	1	0	1	1	1	0	0	1	1	1	1	1	1	1	0	2	1	1	1	1	0	0	0	0	1	1	1	1	1	1	1
	1247	M00740	Methylaspartate cycle	map01230	Biosynthesis of amino acids	Carbon fixation	Reductive citrate cycle	ACO, acnA; aconitate hydratase [EC:4.2.1.3]	ACO, acnA	aconitate hydratase [EC:4.2.1.3]	ec:4.2.1.3	K01681	---	---	1	2	1	1	1	0	1	1	1	0	0	1	1	1	1	1	1	1	0	2	1	1	1	1	0	0	0	0	1	1	1	1	1	1	1
	1248	M00740	Methylaspartate cycle	map01230	Biosynthesis of amino acids	Central metabolism	TCA cycle	ACO, acnA; aconitate hydratase [EC:4.2.1.3]	ACO, acnA	aconitate hydratase [EC:4.2.1.3]	ec:4.2.1.3	K01681	---	---	1	2	1	1	1	0	1	1	1	0	0	1	1	1	1	1	1	1	0	2	1	1	1	1	0	0	0	0	1	1	1	1	1	1	1
	1249	M00740	Methylaspartate cycle	map00020	Citrate cycle (TCA cycle)	Central metabolism	TCA cycle	CS, gltA; citrate synthase [EC:2.3.3.1]	CS, gltA	citrate synthase [EC:2.3.3.1]	ec:2.3.3.1	K01647	---	---	1	1	1	1	1	2	0	0	1	1	1	1	1	1	1	1	1	1	0	1	1	1	0	1	1	1	1	1	1	1	1	1	1	1	1
	1250	M00740	Methylaspartate cycle	map00630	Glyoxylate and dicarboxylate metabolism	Central metabolism	TCA cycle	CS, gltA; citrate synthase [EC:2.3.3.1]	CS, gltA	citrate synthase [EC:2.3.3.1]	ec:2.3.3.1	K01647	---	---	1	1	1	1	1	2	0	0	1	1	1	1	1	1	1	1	1	1	0	1	1	1	0	1	1	1	1	1	1	1	1	1	1	1	1
	1251	M00740	Methylaspartate cycle	map01100	Metabolic pathways	Central metabolism	TCA cycle	CS, gltA; citrate synthase [EC:2.3.3.1]	CS, gltA	citrate synthase [EC:2.3.3.1]	ec:2.3.3.1	K01647	---	---	1	1	1	1	1	2	0	0	1	1	1	1	1	1	1	1	1	1	0	1	1	1	0	1	1	1	1	1	1	1	1	1	1	1	1
	1252	M00740	Methylaspartate cycle	map01110	Biosynthesis of secondary metabolites	Central metabolism	TCA cycle	CS, gltA; citrate synthase [EC:2.3.3.1]	CS, gltA	citrate synthase [EC:2.3.3.1]	ec:2.3.3.1	K01647	---	---	1	1	1	1	1	2	0	0	1	1	1	1	1	1	1	1	1	1	0	1	1	1	0	1	1	1	1	1	1	1	1	1	1	1	1
	1253	M00740	Methylaspartate cycle	map01120	Microbial metabolism in diverse environments	Central metabolism	TCA cycle	CS, gltA; citrate synthase [EC:2.3.3.1]	CS, gltA	citrate synthase [EC:2.3.3.1]	ec:2.3.3.1	K01647	---	---	1	1	1	1	1	2	0	0	1	1	1	1	1	1	1	1	1	1	0	1	1	1	0	1	1	1	1	1	1	1	1	1	1	1	1
	1254	M00740	Methylaspartate cycle	map01200	Carbon metabolism	Central metabolism	TCA cycle	CS, gltA; citrate synthase [EC:2.3.3.1]	CS, gltA	citrate synthase [EC:2.3.3.1]	ec:2.3.3.1	K01647	---	---	1	1	1	1	1	2	0	0	1	1	1	1	1	1	1	1	1	1	0	1	1	1	0	1	1	1	1	1	1	1	1	1	1	1	1
	1255	M00740	Methylaspartate cycle	map01210	2-Oxocarboxylic acid metabolism	Central metabolism	TCA cycle	CS, gltA; citrate synthase [EC:2.3.3.1]	CS, gltA	citrate synthase [EC:2.3.3.1]	ec:2.3.3.1	K01647	---	---	1	1	1	1	1	2	0	0	1	1	1	1	1	1	1	1	1	1	0	1	1	1	0	1	1	1	1	1	1	1	1	1	1	1	1
	1256	M00740	Methylaspartate cycle	map01230	Biosynthesis of amino acids	Central metabolism	TCA cycle	CS, gltA; citrate synthase [EC:2.3.3.1]	CS, gltA	citrate synthase [EC:2.3.3.1]	ec:2.3.3.1	K01647	---	---	1	1	1	1	1	2	0	0	1	1	1	1	1	1	1	1	1	1	0	1	1	1	0	1	1	1	1	1	1	1	1	1	1	1	1
	1257	M00736	Nocardicin A biosynthesis, L-pHPG + arginine + serine => nocardicin A	map00261	Monobactam biosynthesis	---	---	---	mbtH, nocI	MbtH protein	---	K05375	---	---	0	0	0	0	0	0	0	0	1	0	0	0	0	0	0	0	0	0	0	1	0	0	0	0	0	0	0	0	0	0	1	0	0	0	0
	1258	M00736	Nocardicin A biosynthesis, L-pHPG + arginine + serine => nocardicin A	map01100	Metabolic pathways	---	---	---	mbtH, nocI	MbtH protein	---	K05375	---	---	0	0	0	0	0	0	0	0	1	0	0	0	0	0	0	0	0	0	0	1	0	0	0	0	0	0	0	0	0	0	1	0	0	0	0
	1259	M00736	Nocardicin A biosynthesis, L-pHPG + arginine + serine => nocardicin A	map01110	Biosynthesis of secondary metabolites	---	---	---	mbtH, nocI	MbtH protein	---	K05375	---	---	0	0	0	0	0	0	0	0	1	0	0	0	0	0	0	0	0	0	0	1	0	0	0	0	0	0	0	0	0	0	1	0	0	0	0
	1260	M00726	Cationic antimicrobial peptide (CAMP) resistance, lysyl-phosphatidylglycerol (L-PG) synthase MprF	map01503	Cationic antimicrobial peptide (CAMP) resistance	---	---	---	mprF, fmtC	phosphatidylglycerol lysyltransferase [EC:2.3.2.3]	ec:2.3.2.3	K14205	---	---	0	0	0	0	0	0	0	0	0	0	0	0	0	1	0	0	0	0	0	0	0	1	0	0	0	0	0	0	0	0	0	0	0	1	1
	1261	M00726	Cationic antimicrobial peptide (CAMP) resistance, lysyl-phosphatidylglycerol (L-PG) synthase MprF	map02020	Two-component system	---	---	---	mprF, fmtC	phosphatidylglycerol lysyltransferase [EC:2.3.2.3]	ec:2.3.2.3	K14205	---	---	0	0	0	0	0	0	0	0	0	0	0	0	0	1	0	0	0	0	0	0	0	1	0	0	0	0	0	0	0	0	0	0	0	1	1
	1262	M00726	Cationic antimicrobial peptide (CAMP) resistance, lysyl-phosphatidylglycerol (L-PG) synthase MprF	map05150	Staphylococcus aureus infection	---	---	---	mprF, fmtC	phosphatidylglycerol lysyltransferase [EC:2.3.2.3]	ec:2.3.2.3	K14205	---	---	0	0	0	0	0	0	0	0	0	0	0	0	0	1	0	0	0	0	0	0	0	1	0	0	0	0	0	0	0	0	0	0	0	1	1
	1263	M00725	Cationic antimicrobial peptide (CAMP) resistance, dltABCD operon	map00473	D-Alanine metabolism	---	---	---	dltA	D-alanine--poly(phosphoribitol) ligase subunit 1 [EC:6.1.1.13]	ec:6.1.1.13	K03367	---	---	0	0	0	0	0	0	0	0	1	0	0	0	0	0	0	0	0	0	0	1	0	0	0	0	0	0	0	0	0	0	0	0	0	0	0
	1264	M00725	Cationic antimicrobial peptide (CAMP) resistance, dltABCD operon	map01100	Metabolic pathways	---	---	---	dltA	D-alanine--poly(phosphoribitol) ligase subunit 1 [EC:6.1.1.13]	ec:6.1.1.13	K03367	---	---	0	0	0	0	0	0	0	0	1	0	0	0	0	0	0	0	0	0	0	1	0	0	0	0	0	0	0	0	0	0	0	0	0	0	0
	1265	M00725	Cationic antimicrobial peptide (CAMP) resistance, dltABCD operon	map01503	Cationic antimicrobial peptide (CAMP) resistance	---	---	---	dltA	D-alanine--poly(phosphoribitol) ligase subunit 1 [EC:6.1.1.13]	ec:6.1.1.13	K03367	---	---	0	0	0	0	0	0	0	0	1	0	0	0	0	0	0	0	0	0	0	1	0	0	0	0	0	0	0	0	0	0	0	0	0	0	0
	1266	M00725	Cationic antimicrobial peptide (CAMP) resistance, dltABCD operon	map02020	Two-component system	---	---	---	dltA	D-alanine--poly(phosphoribitol) ligase subunit 1 [EC:6.1.1.13]	ec:6.1.1.13	K03367	---	---	0	0	0	0	0	0	0	0	1	0	0	0	0	0	0	0	0	0	0	1	0	0	0	0	0	0	0	0	0	0	0	0	0	0	0
	1267	M00725	Cationic antimicrobial peptide (CAMP) resistance, dltABCD operon	map05150	Staphylococcus aureus infection	---	---	---	dltA	D-alanine--poly(phosphoribitol) ligase subunit 1 [EC:6.1.1.13]	ec:6.1.1.13	K03367	---	---	0	0	0	0	0	0	0	0	1	0	0	0	0	0	0	0	0	0	0	1	0	0	0	0	0	0	0	0	0	0	0	0	0	0	0
	1268	M00718	Multidrug resistance, efflux pump MexAB-OprM	map01501	beta-Lactam resistance	---	---	---	acrA, mexA, adeI, smeD, mtrC, cmeA	membrane fusion protein, multidrug efflux system	---	K03585	---	---	0	4	3	0	1	1	1	0	2	0	1	2	0	0	1	1	0	4	1	2	1	0	1	0	0	1	1	4	3	2	5	5	4	0	0
	1269	M00718	Multidrug resistance, efflux pump MexAB-OprM	map01503	Cationic antimicrobial peptide (CAMP) resistance	---	---	---	acrA, mexA, adeI, smeD, mtrC, cmeA	membrane fusion protein, multidrug efflux system	---	K03585	---	---	0	4	3	0	1	1	1	0	2	0	1	2	0	0	1	1	0	4	1	2	1	0	1	0	0	1	1	4	3	2	5	5	4	0	0
	1270	M00718	Multidrug resistance, efflux pump MexAB-OprM	map01501	beta-Lactam resistance	---	---	---	acrB, mexB, adeJ, smeE, mtrD, cmeB	multidrug efflux pump	---	K18138	---	---	0	1	1	0	0	0	1	0	1	0	0	1	0	0	0	0	0	1	0	1	0	0	1	0	0	0	0	0	0	1	1	2	1	0	0
	1271	M00718	Multidrug resistance, efflux pump MexAB-OprM	map01503	Cationic antimicrobial peptide (CAMP) resistance	---	---	---	acrB, mexB, adeJ, smeE, mtrD, cmeB	multidrug efflux pump	---	K18138	---	---	0	1	1	0	0	0	1	0	1	0	0	1	0	0	0	0	0	1	0	1	0	0	1	0	0	0	0	0	0	1	1	2	1	0	0
	1272	M00718	Multidrug resistance, efflux pump MexAB-OprM	map01501	beta-Lactam resistance	---	---	---	oprM, emhC, ttgC, cusC, adeK, smeF, mtrE, cmeC, gesC	outer membrane protein, multidrug efflux system	---	K18139	---	---	0	1	0	0	0	0	0	0	2	0	0	1	0	0	0	0	0	1	0	2	0	0	0	0	0	0	0	2	0	0	2	0	1	0	0
	1273	M00718	Multidrug resistance, efflux pump MexAB-OprM	map02024	Quorum sensing	---	---	---	oprM, emhC, ttgC, cusC, adeK, smeF, mtrE, cmeC, gesC	outer membrane protein, multidrug efflux system	---	K18139	---	---	0	1	0	0	0	0	0	0	2	0	0	1	0	0	0	0	0	1	0	2	0	0	0	0	0	0	0	2	0	0	2	0	1	0	0
	1274	M00714	Multidrug resistance, efflux pump QacA	---	---	---	---	---	smvA, qacA, lfrA	MFS transporter, DHA2 family, multidrug resistance protein	---	K08167	---	---	0	0	1	0	0	0	0	0	0	0	0	0	0	0	0	0	0	0	0	0	0	0	0	0	0	0	0	0	0	0	1	0	0	0	0
	1275	M00698	Multidrug resistance, efflux pump BpeEF-OprC	---	---	---	---	---	bpeT	LysR family transcriptional regulator, regulator for bpeEF and oprC	---	K18900	---	---	0	3	1	0	0	1	2	0	0	0	0	0	0	0	0	0	0	3	0	0	0	0	1	0	0	0	1	0	0	0	1	0	3	0	0
	1276	M00697	Multidrug resistance, efflux pump MdtEF-TolC	map01501	beta-Lactam resistance	Secretion system	Type I Secretion	tolC; outer membrane protein	tolC, bepC, cyaE, raxC, sapF, rsaF, hasF	outer membrane protein	---	K12340	RaxAB-RaxC type I secretion system	outer membrane protein	1	2	1	1	1	1	1	0	2	0	1	1	0	1	1	0	1	2	1	1	1	1	1	1	0	1	1	3	1	1	3	0	2	1	1
	1277	M00697	Multidrug resistance, efflux pump MdtEF-TolC	map01503	Cationic antimicrobial peptide (CAMP) resistance	Secretion system	Type I Secretion	tolC; outer membrane protein	tolC, bepC, cyaE, raxC, sapF, rsaF, hasF	outer membrane protein	---	K12340	RaxAB-RaxC type I secretion system	outer membrane protein	1	2	1	1	1	1	1	0	2	0	1	1	0	1	1	0	1	2	1	1	1	1	1	1	0	1	1	3	1	1	3	0	2	1	1
	1278	M00697	Multidrug resistance, efflux pump MdtEF-TolC	map02020	Two-component system	Secretion system	Type I Secretion	tolC; outer membrane protein	tolC, bepC, cyaE, raxC, sapF, rsaF, hasF	outer membrane protein	---	K12340	RaxAB-RaxC type I secretion system	outer membrane protein	1	2	1	1	1	1	1	0	2	0	1	1	0	1	1	0	1	2	1	1	1	1	1	1	0	1	1	3	1	1	3	0	2	1	1
	1279	M00697	Multidrug resistance, efflux pump MdtEF-TolC	map03070	Bacterial secretion system	Secretion system	Type I Secretion	tolC; outer membrane protein	tolC, bepC, cyaE, raxC, sapF, rsaF, hasF	outer membrane protein	---	K12340	RaxAB-RaxC type I secretion system	outer membrane protein	1	2	1	1	1	1	1	0	2	0	1	1	0	1	1	0	1	2	1	1	1	1	1	1	0	1	1	3	1	1	3	0	2	1	1
	1280	M00697	Multidrug resistance, efflux pump MdtEF-TolC	map04626	Plant-pathogen interaction	Secretion system	Type I Secretion	tolC; outer membrane protein	tolC, bepC, cyaE, raxC, sapF, rsaF, hasF	outer membrane protein	---	K12340	RaxAB-RaxC type I secretion system	outer membrane protein	1	2	1	1	1	1	1	0	2	0	1	1	0	1	1	0	1	2	1	1	1	1	1	1	0	1	1	3	1	1	3	0	2	1	1
	1281	M00697	Multidrug resistance, efflux pump MdtEF-TolC	map05133	Pertussis	Secretion system	Type I Secretion	tolC; outer membrane protein	tolC, bepC, cyaE, raxC, sapF, rsaF, hasF	outer membrane protein	---	K12340	RaxAB-RaxC type I secretion system	outer membrane protein	1	2	1	1	1	1	1	0	2	0	1	1	0	1	1	0	1	2	1	1	1	1	1	1	0	1	1	3	1	1	3	0	2	1	1
	1282	M00696	Multidrug resistance, efflux pump AcrEF-TolC	map01501	beta-Lactam resistance	Secretion system	Type I Secretion	tolC; outer membrane protein	tolC, bepC, cyaE, raxC, sapF, rsaF, hasF	outer membrane protein	---	K12340	RaxAB-RaxC type I secretion system	outer membrane protein	1	2	1	1	1	1	1	0	2	0	1	1	0	1	1	0	1	2	1	1	1	1	1	1	0	1	1	3	1	1	3	0	2	1	1
	1283	M00696	Multidrug resistance, efflux pump AcrEF-TolC	map01503	Cationic antimicrobial peptide (CAMP) resistance	Secretion system	Type I Secretion	tolC; outer membrane protein	tolC, bepC, cyaE, raxC, sapF, rsaF, hasF	outer membrane protein	---	K12340	RaxAB-RaxC type I secretion system	outer membrane protein	1	2	1	1	1	1	1	0	2	0	1	1	0	1	1	0	1	2	1	1	1	1	1	1	0	1	1	3	1	1	3	0	2	1	1
	1284	M00696	Multidrug resistance, efflux pump AcrEF-TolC	map02020	Two-component system	Secretion system	Type I Secretion	tolC; outer membrane protein	tolC, bepC, cyaE, raxC, sapF, rsaF, hasF	outer membrane protein	---	K12340	RaxAB-RaxC type I secretion system	outer membrane protein	1	2	1	1	1	1	1	0	2	0	1	1	0	1	1	0	1	2	1	1	1	1	1	1	0	1	1	3	1	1	3	0	2	1	1
	1285	M00696	Multidrug resistance, efflux pump AcrEF-TolC	map03070	Bacterial secretion system	Secretion system	Type I Secretion	tolC; outer membrane protein	tolC, bepC, cyaE, raxC, sapF, rsaF, hasF	outer membrane protein	---	K12340	RaxAB-RaxC type I secretion system	outer membrane protein	1	2	1	1	1	1	1	0	2	0	1	1	0	1	1	0	1	2	1	1	1	1	1	1	0	1	1	3	1	1	3	0	2	1	1
	1286	M00696	Multidrug resistance, efflux pump AcrEF-TolC	map04626	Plant-pathogen interaction	Secretion system	Type I Secretion	tolC; outer membrane protein	tolC, bepC, cyaE, raxC, sapF, rsaF, hasF	outer membrane protein	---	K12340	RaxAB-RaxC type I secretion system	outer membrane protein	1	2	1	1	1	1	1	0	2	0	1	1	0	1	1	0	1	2	1	1	1	1	1	1	0	1	1	3	1	1	3	0	2	1	1
	1287	M00696	Multidrug resistance, efflux pump AcrEF-TolC	map05133	Pertussis	Secretion system	Type I Secretion	tolC; outer membrane protein	tolC, bepC, cyaE, raxC, sapF, rsaF, hasF	outer membrane protein	---	K12340	RaxAB-RaxC type I secretion system	outer membrane protein	1	2	1	1	1	1	1	0	2	0	1	1	0	1	1	0	1	2	1	1	1	1	1	1	0	1	1	3	1	1	3	0	2	1	1
	1288	M00673	Cephamycin C biosynthesis, aminoadipate + cycteine + valine => cephamycin C	map00311	Penicillin and cephalosporin biosynthesis	---	---	---	cefD	isopenicillin-N epimerase [EC:5.1.1.17]	ec:5.1.1.17	K04127	---	---	0	0	0	0	0	0	0	0	0	0	0	1	0	0	0	0	0	0	0	0	0	0	0	0	0	0	0	0	0	0	0	0	0	0	0
	1289	M00673	Cephamycin C biosynthesis, aminoadipate + cycteine + valine => cephamycin C	map01100	Metabolic pathways	---	---	---	cefD	isopenicillin-N epimerase [EC:5.1.1.17]	ec:5.1.1.17	K04127	---	---	0	0	0	0	0	0	0	0	0	0	0	1	0	0	0	0	0	0	0	0	0	0	0	0	0	0	0	0	0	0	0	0	0	0	0
	1290	M00673	Cephamycin C biosynthesis, aminoadipate + cycteine + valine => cephamycin C	map01110	Biosynthesis of secondary metabolites	---	---	---	cefD	isopenicillin-N epimerase [EC:5.1.1.17]	ec:5.1.1.17	K04127	---	---	0	0	0	0	0	0	0	0	0	0	0	1	0	0	0	0	0	0	0	0	0	0	0	0	0	0	0	0	0	0	0	0	0	0	0
	1291	M00651	Vancomycin resistance, D-Ala-D-Lac type	map01502	Vancomycin resistance	---	---	---	vanJ	vancomycin resistance protein VanJ	---	K18353	---	---	0	0	0	0	0	0	0	0	0	1	0	0	0	0	0	0	0	0	1	0	0	0	0	0	0	1	0	1	0	0	0	0	0	0	0
	1292	M00651	Vancomycin resistance, D-Ala-D-Lac type	map02020	Two-component system	---	---	---	vanJ	vancomycin resistance protein VanJ	---	K18353	---	---	0	0	0	0	0	0	0	0	0	1	0	0	0	0	0	0	0	0	1	0	0	0	0	0	0	1	0	1	0	0	0	0	0	0	0
	1293	M00651	Vancomycin resistance, D-Ala-D-Lac type	map00550	Peptidoglycan biosynthesis	---	---	---	vanY	zinc D-Ala-D-Ala carboxypeptidase [EC:3.4.17.14]	ec:3.4.17.14	K07260	---	---	0	0	0	0	0	0	0	0	0	0	1	0	0	0	0	0	0	0	0	0	0	0	0	0	0	1	0	1	1	0	0	1	0	0	0
	1294	M00651	Vancomycin resistance, D-Ala-D-Lac type	map01100	Metabolic pathways	---	---	---	vanY	zinc D-Ala-D-Ala carboxypeptidase [EC:3.4.17.14]	ec:3.4.17.14	K07260	---	---	0	0	0	0	0	0	0	0	0	0	1	0	0	0	0	0	0	0	0	0	0	0	0	0	0	1	0	1	1	0	0	1	0	0	0
	1295	M00651	Vancomycin resistance, D-Ala-D-Lac type	map01502	Vancomycin resistance	---	---	---	vanY	zinc D-Ala-D-Ala carboxypeptidase [EC:3.4.17.14]	ec:3.4.17.14	K07260	---	---	0	0	0	0	0	0	0	0	0	0	1	0	0	0	0	0	0	0	0	0	0	0	0	0	0	1	0	1	1	0	0	1	0	0	0
	1296	M00651	Vancomycin resistance, D-Ala-D-Lac type	map02020	Two-component system	---	---	---	vanY	zinc D-Ala-D-Ala carboxypeptidase [EC:3.4.17.14]	ec:3.4.17.14	K07260	---	---	0	0	0	0	0	0	0	0	0	0	1	0	0	0	0	0	0	0	0	0	0	0	0	0	0	1	0	1	1	0	0	1	0	0	0
	1297	M00651	Vancomycin resistance, D-Ala-D-Lac type	map01502	Vancomycin resistance	---	---	---	vanX	zinc D-Ala-D-Ala dipeptidase [EC:3.4.13.22]	ec:3.4.13.22	K08641	---	---	0	0	0	0	0	0	0	0	0	0	0	0	0	0	0	0	0	0	0	0	0	0	0	0	0	1	0	1	0	0	0	0	0	0	0
	1298	M00651	Vancomycin resistance, D-Ala-D-Lac type	map02020	Two-component system	---	---	---	vanX	zinc D-Ala-D-Ala dipeptidase [EC:3.4.13.22]	ec:3.4.13.22	K08641	---	---	0	0	0	0	0	0	0	0	0	0	0	0	0	0	0	0	0	0	0	0	0	0	0	0	0	1	0	1	0	0	0	0	0	0	0
[truncated: 14,559 more rows]
[truncated: 7 more columns]
