# Supplementary material for: Novel hydrocarbon-degradation pathways in uncultured bacteria in industrial-impacted ocean waters
Source: Research Square preprint supplement (doi:10.21203/rs.3.rs-2060586/v1), 2022-09-16
Supplement: Supplementary file 6 [file c2f02c08a8e29d2ea9501cb5.docx]

**Table 1.** Microbial diversity and abundance of 16S rRNA genes sequences from the SIP enrichments, based on PCR amplification and clone libraries.a

OTU No. Rep. seq.b Closest BLASTn matchc Accession No. Clones in library (%)d

*SIP using surface (5 m depth) seawater:*

2.14 HEX-5m-2.14 *Alcanivorax borkumensis* (99.32%) NR074890 31.9

2.6 HEX-5m-2.6 *Thalassolituus oleivorans* (99.67%) NR102806 22.3

1.1 HEX-5m-1.1 *Lentibacter algarum* (99.56%) NR108333 14.9

2.4 HEX-5m-2.4 *Oleibacter marinus* (96.23%) NR114287 8.5

*SIP using subsurface (700 m depth) seawater:*

3.27 HEX-700m-3.27 *Oleibacter marinus* (96.36%) NR114287 17

4.22 HEX-700m-4.22 *Alcanivorax borkumensis* (98.73%) NR074890 12.8

3.15 HEX-700m-3.15 *Marinobacter algicola* (98.77%) NR042807 9.6

4.3 HEX-700m-4.3 *Phaeobacter arcticus* (98.36%) NR043888 8.5

3.32 HEX-700m-3.32 *Glaciecola nitratireducens* (95.33%) NR074628 8.5

*Glaciecola pallidula* (95.33%) NR117119

4.12 HEX-700m-4.12 *Dokdonia genika* (95.42%) NR041272 5.3

a SIP with [U-13C] *n*-hexadecane.

b Representative sequence for each OTU.

c Results are to the closest type strain; percentage similarity shown in parentheses.

d Total number of sequences in each of the 13C-enriched DNA clone library from the two *n*-hexadecane SIP incubations was 48. A 97% cut-off was used to classify sequences to an OTU.
