# Supplementary material for: Novel hydrocarbon-degradation pathways in uncultured bacteria in industrial-impacted ocean waters
Source: Research Square preprint supplement (doi:10.21203/rs.3.rs-2060586/v1), 2022-09-16
Supplement: Supplementary file 7 [file c9783f3b8af7ca4cebf4fae0.xlsx]

## Sheet: Sp1
	Supplementary Table 1. Overview of the metagenome assembly. The first column indicates sample IDs, followed by the program name used for the assembly. The following columns show characteristics such as N50 and minimal contig length.
		Sample	Assembly tools used	Number of contigs after assembly	Total bases assembled	Contig n50	Minimal contig length	Percent of Sequences assembled	Percent of Sequences assembled gt10k	Number of singletons after assembly
	1	5mSIPHEX1MG	metaspades_3.14.1	94724	133637554	4515	200	99.3	87.6	1769007
	2	5mSIPHEX2MG	metaspades_3.14.1	86399	108635155	3483	200	99.4	85.9	2383780
	3	700mSIPHEX1MG	metaspades_3.14.1	44814	97974519	28123	200	99.6	96.0	1050798
	4	700mSIPHEX2MG	metaspades_3.14.1	44798	93037623	24526	200	99.5	95.6	1568671
